# Supplementary material for: Spatiotemporal dynamics of PIEZO1 localization controls keratinocyte migration during wound healing
Source: eLife journal article supplement (doi:10.7554/elife.65415), 2021-09-27
Supplement: fig2-data1 [file elife-65415-fig2-data1-v3.xlsx]

## Sheet: 2B - Con(cKO) Trajecto
Plotted Trajectories for Figure 2B and Supp Fig 3. Relative X and Relative Y are seen plotted for each trajectory
Cell 1					Cell 2					Cell 3					Cell 4					Cell 5					Cell 6					Cell 7					Cell 8					Cell 9					Cell 10
Frame	X Position	Y Position	relative X	relative Y	Frame	X Position	Y Position	relative X	relative Y	Frame	X Position	Y Position	relative X	relative Y	Frame	X Position	Y Position	relative X	relative Y	Frame	X Position	Y Position	relative X	relative Y	Frame	X Position	Y Position	relative X	relative Y	Frame	X Position	Y Position	relative X	relative Y	Frame	X Position	Y Position	relative X	relative Y	Frame	X Position	Y Position	relative X	relative Y	Frame	X Position	Y Position	relative X	relative Y
1	133	772			1	318	586	0	0	1	761	376	0	0	1	218	711	0	0	1	159	636	0	0	1	554	829	0	0	1	541	594	0	0	1	758	965	0	0	1	979	131	0	0	1	969	297	0	0
2	133	772	0	0	2	318	588	0	2	2	761	376	0	0	2	218	711	0	0	2	162	634	3	-2	2	555	828	1	-1	2	537	597	-4	3	2	755	966	-3	1	2	990	124	11	-7	2	969	295	0	-2
3	133	772	0	0	3	318	588	0	2	3	761	376	0	0	3	219	713	1	2	3	166	633	7	-3	3	555	828	1	-1	3	535	598	-6	4	3	753	965	-5	0	3	986	124	7	-7	3	969	289	0	-8
4	130	777	-3	5	4	317	588	-1	2	4	761	376	0	0	4	219	713	1	2	4	164	633	5	-3	4	554	828	0	-1	4	535	598	-6	4	4	753	967	-5	2	4	982	128	3	-3	4	966	286	-3	-11
5	130	778	-3	6	5	317	588	-1	2	5	761	376	0	0	5	219	715	1	4	5	159	626	0	-10	5	554	828	0	-1	5	536	597	-5	3	5	753	968	-5	3	5	981	129	2	-2	5	966	285	-3	-12
6	133	779	0	7	6	316	590	-2	4	6	763	376	2	0	6	219	715	1	4	6	158	623	-1	-13	6	554	828	0	-1	6	535	599	-6	5	6	749	970	-9	5	6	984	128	5	-3	6	961	288	-8	-9
7	137	783	4	11	7	316	589	-2	3	7	763	376	2	0	7	221	719	3	8	7	158	621	-1	-15	7	554	827	0	-2	7	535	599	-6	5	7	748	972	-10	7	7	983	129	4	-2	7	961	292	-8	-5
8	140	788	7	16	8	316	589	-2	3	8	765	376	4	0	8	221	719	3	8	8	161	618	2	-18	8	555	827	1	-2	8	535	599	-6	5	8	747	970	-11	5	8	982	128	3	-3	8	964	292	-5	-5
9	140	790	7	18	9	316	588	-2	2	9	765	379	4	3	9	222	720	4	9	9	162	618	3	-18	9	556	826	2	-3	9	536	598	-5	4	9	745	970	-13	5	9	980	129	1	-2	9	967	291	-2	-6
10	140	790	7	18	10	315	588	-3	2	10	766	381	5	5	10	227	720	9	9	10	164	618	5	-18	10	556	825	2	-4	10	537	597	-4	3	10	743	972	-15	7	10	978	129	-1	-2	10	967	291	-2	-6
11	140	791	7	19	11	315	589	-3	3	11	768	381	7	5	11	227	720	9	9	11	164	618	5	-18	11	559	824	5	-5	11	536	599	-5	5	11	738	973	-20	8	11	977	128	-2	-3	11	967	291	-2	-6
12	140	791	7	19	12	315	588	-3	2	12	768	381	7	5	12	228	720	10	9	12	164	618	5	-18	12	560	823	6	-6	12	536	598	-5	4	12	741	971	-17	6	12	977	128	-2	-3	12	967	291	-2	-6
13	144	792	11	20	13	315	588	-3	2	13	768	381	7	5	13	231	721	13	10	13	164	618	5	-18	13	561	822	7	-7	13	536	597	-5	3	13	739	971	-19	6	13	975	128	-4	-3	13	966	292	-3	-5
14	144	794	11	22	14	315	588	-3	2	14	768	379	7	3	14	236	723	18	12	14	163	613	4	-23	14	561	822	7	-7	14	536	596	-5	2	14	733	972	-25	7	14	973	128	-6	-3	14	966	292	-3	-5
15	144	794	11	22	15	315	587	-3	1	15	768	379	7	3	15	238	725	20	14	15	163	613	4	-23	15	563	822	9	-7	15	534	597	-7	3	15	735	969	-23	4	15	971	126	-8	-5	15	969	300	0	3
16	144	796	11	24	16	315	588	-3	2	16	768	379	7	3	16	239	725	21	14	16	163	615	4	-21	16	566	823	12	-6	16	534	595	-7	1	16	730	971	-28	6	16	970	127	-9	-4	16	970	300	1	3
17	144	796	11	24	17	316	586	-2	0	17	770	379	9	3	17	239	725	21	14	17	166	615	7	-21	17	567	823	13	-6	17	532	593	-9	-1	17	727	971	-31	6	17	968	126	-11	-5	17	970	300	1	3
18	144	796	11	24	18	318	583	0	-3	18	770	379	9	3	18	240	725	22	14	18	166	615	7	-21	18	568	823	14	-6	18	528	593	-13	-1	18	725	970	-33	5	18	966	125	-13	-6	18	970	300	1	3
19	144	788	11	16	19	320	578	2	-8	19	770	381	9	5	19	240	722	22	11	19	166	615	7	-21	19	569	823	15	-6	19	524	592	-17	-2	19	724	969	-34	4	19	966	122	-13	-9	19	969	300	0	3
20	143	797	10	25	20	323	574	5	-12	20	770	382	9	6	20	244	720	26	9	20	166	615	7	-21	20	570	822	16	-7	20	520	592	-21	-2	20	726	965	-32	0	20	963	123	-16	-8	20	969	301	0	4
21	142	802	9	30	21	324	572	6	-14	21	771	381	10	5	21	245	720	27	9	21	166	615	7	-21	21	572	823	18	-6	21	517	592	-24	-2	21	722	966	-36	1	21	962	124	-17	-7	21	969	302	0	5
22	142	802	9	30	22	326	569	8	-17	22	771	381	10	5	22	248	719	30	8	22	164	615	5	-21	22	573	823	19	-6	22	517	592	-24	-2	22	720	967	-38	2	22	960	124	-19	-7	22	969	302	0	5
23	142	802	9	30	23	329	567	11	-19	23	772	381	11	5	23	249	717	31	6	23	164	615	5	-21	23	574	823	20	-6	23	517	592	-24	-2	23	719	967	-39	2	23	959	124	-20	-7	23	969	302	0	5
24	142	802	9	30	24	331	566	13	-20	24	772	382	11	6	24	249	717	31	6	24	164	615	5	-21	24	574	824	20	-5	24	518	593	-23	-1	24	716	968	-42	3	24	957	125	-22	-6	24	967	302	-2	5
25	142	802	9	30	25	332	564	14	-22	25	772	383	11	7	25	250	717	32	6	25	164	615	5	-21	25	575	825	21	-4	25	518	594	-23	0	25	718	966	-40	1	25	956	125	-23	-6	25	967	302	-2	5
26	143	803	10	31	26	333	564	15	-22	26	772	384	11	8	26	251	717	33	6	26	164	613	5	-23	26	577	825	23	-4	26	515	596	-26	2	26	716	964	-42	-1	26	956	127	-23	-4	26	967	302	-2	5
27	144	803	11	31	27	333	563	15	-23	27	771	384	10	8	27	250	717	32	6	27	166	613	7	-23	27	577	826	23	-3	27	519	597	-22	3	27	715	964	-43	-1	27	955	123	-24	-8	27	967	302	-2	5
28	144	803	11	31	28	333	563	15	-23	28	771	384	10	8	28	250	719	32	8	28	167	613	8	-23	28	578	826	24	-3	28	519	598	-22	4	28	714	963	-44	-2	28	954	123	-25	-8	28	967	302	-2	5
29	153	805	20	33	29	333	562	15	-24	29	771	384	10	8	29	251	719	33	8	29	167	613	8	-23	29	578	828	24	-1	29	517	599	-24	5	29	713	963	-45	-2	29	952	122	-27	-9	29	970	302	1	5
30	153	806	20	34	30	333	562	15	-24	30	773	384	12	8	30	253	719	35	8	30	167	613	8	-23	30	578	829	24	0	30	517	598	-24	4	30	711	964	-47	-1	30	951	123	-28	-8	30	972	302	3	5
31	152	809	19	37	31	331	564	13	-22	31	777	384	16	8	31	254	719	36	8	31	167	613	8	-23	31	579	830	25	1	31	517	598	-24	4	31	708	968	-50	3	31	950	125	-29	-6	31	970	304	1	7
32	141	816	8	44	32	332	563	14	-23	32	778	382	17	6	32	255	719	37	8	32	167	613	8	-23	32	580	830	26	1	32	514	596	-27	2	32	709	961	-49	-4	32	949	124	-30	-7	32	970	304	1	7
33	130	830	-3	58	33	332	564	14	-22	33	779	382	18	6	33	257	720	39	9	33	168	613	9	-23	33	580	831	26	2	33	511	594	-30	0	33	707	961	-51	-4	33	947	124	-32	-7	33	970	305	1	8
34	126	838	-7	66	34	332	564	14	-22	34	779	381	18	5	34	260	720	42	9	34	168	613	9	-23	34	581	831	27	2	34	499	594	-42	0	34	705	961	-53	-4	34	945	124	-34	-7	34	961	311	-8	14
35	126	844	-7	72	35	332	564	14	-22	35	781	381	20	5	35	261	720	43	9	35	169	613	10	-23	35	580	832	26	3	35	504	594	-37	0	35	704	960	-54	-5	35	943	124	-36	-7	35	961	311	-8	14
36	108	849	-25	77	36	332	565	14	-21	36	781	381	20	5	36	261	720	43	9	36	164	613	5	-23	36	582	833	28	4	36	504	593	-37	-1	36	704	958	-54	-7	36	942	122	-37	-9	36	964	310	-5	13
37	107	851	-26	79	37	333	565	15	-21	37	784	381	23	5	37	259	723	41	12	37	164	615	5	-21	37	582	833	28	4	37	505	591	-36	-3	37	691	969	-67	4	37	941	121	-38	-10	37	964	308	-5	11
38	107	852	-26	80	38	335	564	17	-22	38	787	377	26	1	38	259	725	41	14	38	164	615	5	-21	38	582	834	28	5	38	506	588	-35	-6	38	690	967	-68	2	38	940	121	-39	-10	38	967	305	-2	8
39	103	856	-30	84	39	336	563	18	-23	39	788	376	27	0	39	259	727	41	16	39	164	615	5	-21	39	582	834	28	5	39	505	586	-36	-8	39	690	967	-68	2	39	937	121	-42	-10	39	967	304	-2	7
40	102	856	-31	84	40	336	563	18	-23	40	789	376	28	0	40	260	728	42	17	40	163	615	4	-21	40	581	835	27	6	40	503	588	-38	-6	40	690	963	-68	-2	40	936	120	-43	-11	40	967	304	-2	7
41	99	861	-34	89	41	337	564	19	-22	41	789	376	28	0	41	260	728	42	17	41	163	615	4	-21	41	583	835	29	6	41	501	589	-40	-5	41	688	965	-70	0	41	937	119	-42	-12	41	967	304	-2	7
42	97	862	-36	90	42	338	563	20	-23	42	789	376	28	0	42	257	732	39	21	42	163	615	4	-21	42	583	836	29	7	42	500	588	-41	-6	42	688	963	-70	-2	42	936	118	-43	-13	42	966	304	-3	7
43	95	868	-38	96	43	340	563	22	-23	43	791	376	30	0	43	253	736	35	25	43	163	613	4	-23	43	582	837	28	8	43	498	587	-43	-7	43	688	963	-70	-2	43	934	118	-45	-13	43	964	304	-5	7
44	95	873	-38	101	44	342	562	24	-24	44	792	376	31	0	44	250	740	32	29	44	163	613	4	-23	44	582	837	28	8	44	495	583	-46	-11	44	686	963	-72	-2	44	934	117	-45	-14	44	963	304	-6	7
45	95	875	-38	103	45	342	562	24	-24	45	793	376	32	0	45	253	750	35	39	45	164	613	5	-23	45	583	837	29	8	45	494	582	-47	-12	45	685	963	-73	-2	45	933	117	-46	-14	45	961	304	-8	7
46	99	877	-34	105	46	343	563	25	-23	46	796	376	35	0	46	253	751	35	40	46	164	613	5	-23	46	586	837	32	8	46	493	579	-48	-15	46	684	963	-74	-2	46	933	119	-46	-12	46	961	304	-8	7
47	109	876	-24	104	47	344	563	26	-23	47	797	376	36	0	47	253	754	35	43	47	164	615	5	-21	47	585	838	31	9	47	492	578	-49	-16	47	683	963	-75	-2	47	932	119	-47	-12	47	961	304	-8	7
48	107	871	-26	99	48	345	562	27	-24	48	798	376	37	0	48	254	749	36	38	48	164	616	5	-20	48	585	839	31	10	48	491	579	-50	-15	48	684	964	-74	-1	48	932	118	-47	-13	48	961	304	-8	7
49	102	871	-31	99	49	345	562	27	-24	49	798	376	37	0	49	256	748	38	37	49	164	616	5	-20	49	584	840	30	11	49	489	577	-52	-17	49	683	963	-75	-2	49	932	118	-47	-13	49	960	304	-9	7
50	101	872	-32	100	50	345	562	27	-24	50	798	376	37	0	50	260	746	42	35	50	164	616	5	-20	50	584	840	30	11	50	486	573	-55	-21	50	683	964	-75	-1	50	932	117	-47	-14	50	956	304	-13	7
51	101	872	-32	100	51	347	562	29	-24	51	798	376	37	0	51	262	744	44	33	51	164	616	5	-20	51	585	841	31	12	51	483	572	-58	-22	51	682	964	-76	-1	51	931	118	-48	-13	51	954	304	-15	7
52	97	873	-36	101	52	347	562	29	-24	52	802	373	41	-3	52	265	743	47	32	52	164	616	5	-20	52	584	841	30	12	52	480	569	-61	-25	52	681	964	-77	-1	52	930	119	-49	-12	52	954	304	-15	7
53	96	873	-37	101	53	346	562	28	-24	53	803	373	42	-3	53	265	742	47	31	53	164	616	5	-20	53	585	841	31	12	53	478	575	-63	-19	53	681	964	-77	-1	53	932	118	-47	-13	53	954	302	-15	5
54	96	870	-37	98	54	346	562	28	-24	54	802	373	41	-3	54	267	739	49	28	54	164	616	5	-20	54	583	841	29	12	54	478	575	-63	-19	54	681	963	-77	-2	54	930	120	-49	-11	54	953	301	-16	4
55	96	869	-37	97	55	346	562	28	-24	55	802	374	41	-2	55	268	738	50	27	55	164	616	5	-20	55	583	841	29	12	55	477	576	-64	-18	55	680	963	-78	-2	55	929	120	-50	-11	55	953	301	-16	4
56	100	869	-33	97	56	346	563	28	-23	56	802	374	41	-2	56	271	736	53	25	56	164	616	5	-20	56	585	842	31	13	56	476	577	-65	-17	56	679	962	-79	-3	56	929	118	-50	-13	56	953	301	-16	4
57	103	869	-30	97	57	345	563	27	-23	57	802	374	41	-2	57	272	734	54	23	57	170	619	11	-17	57	584	843	30	14	57	475	578	-66	-16	57	678	962	-80	-3	57	929	118	-50	-13	57	953	301	-16	4
58	103	866	-30	94	58	345	564	27	-22	58	802	374	41	-2	58	274	733	56	22	58	164	619	5	-17	58	584	843	30	14	58	475	579	-66	-15	58	679	964	-79	-1	58	929	118	-50	-13	58	953	301	-16	4
59	103	863	-30	91	59	345	564	27	-22	59	802	374	41	-2	59	267	739	49	28	59	164	622	5	-14	59	583	844	29	15	59	475	578	-66	-16	59	679	965	-79	0	59	929	118	-50	-13	59	954	301	-15	4
60	101	863	-32	91	60	346	565	28	-21	60	802	376	41	0	60	271	740	53	29	60	166	622	7	-14	60	583	844	29	15	60	474	577	-67	-17	60	679	964	-79	-1	60	929	118	-50	-13	60	957	301	-12	4
61	101	863	-32	91	61	348	566	30	-20	61	802	376	41	0	61	271	740	53	29	61	166	622	7	-14	61	584	845	30	16	61	474	575	-67	-19	61	678	962	-80	-3	61	929	116	-50	-15	61	959	301	-10	4
62	101	863	-32	91	62	349	566	31	-20	62	802	376	41	0	62	277	740	59	29	62	166	622	7	-14	62	583	846	29	17	62	474	575	-67	-19	62	677	961	-81	-4	62	928	115	-51	-16	62	959	301	-10	4
63	97	863	-36	91	63	350	566	32	-20	63	800	373	39	-3	63	278	740	60	29	63	166	622	7	-14	63	583	846	29	17	63	473	576	-68	-18	63	677	962	-81	-3	63	927	116	-52	-15	63	957	301	-12	4
64	102	861	-31	89	64	348	567	30	-19	64	799	372	38	-4	64	278	738	60	27	64	166	621	7	-15	64	582	846	28	17	64	473	576	-68	-18	64	677	961	-81	-4	64	927	115	-52	-16	64	957	301	-12	4
65	105	858	-28	86	65	348	568	30	-18	65	798	371	37	-5	65	277	736	59	25	65	167	621	8	-15	65	581	847	27	18	65	473	576	-68	-18	65	677	961	-81	-4	65	927	115	-52	-16	65	956	301	-13	4
66	105	856	-28	84	66	350	569	32	-17	66	796	369	35	-7	66	277	736	59	25	66	167	621	8	-15	66	580	850	26	21	66	473	575	-68	-19	66	676	959	-82	-6	66	928	112	-51	-19	66	951	300	-18	3
67	105	858	-28	86	67	351	569	33	-17	67	791	371	30	-5	67	277	736	59	25	67	166	619	7	-17	67	580	850	26	21	67	473	576	-68	-18	67	676	958	-82	-7	67	928	112	-51	-19	67	950	300	-19	3
68	106	862	-27	90	68	352	569	34	-17	68	789	372	28	-4	68	277	737	59	26	68	164	619	5	-17	68	581	849	27	20	68	472	577	-69	-17	68	675	958	-83	-7	68	929	111	-50	-20	68	950	300	-19	3
69	108	862	-25	90	69	354	569	36	-17	69	788	373	27	-3	69	279	737	61	26	69	164	619	5	-17	69	581	849	27	20	69	472	577	-69	-17	69	676	957	-82	-8	69	928	111	-51	-20	69	954	300	-15	3
70	108	862	-25	90	70	357	568	39	-18	70	791	371	30	-5	70	282	736	64	25	70	164	619	5	-17	70	580	849	26	20	70	472	574	-69	-20	70	676	960	-82	-5	70	927	112	-52	-19	70	951	302	-18	5
71	108	862	-25	90	71	359	567	41	-19	71	791	371	30	-5	71	284	734	66	23	71	164	619	5	-17	71	580	850	26	21	71	472	574	-69	-20	71	675	959	-83	-6	71	930	111	-49	-20	71	945	304	-24	7
72	108	862	-25	90	72	359	567	41	-19	72	791	371	30	-5	72	288	732	70	21	72	164	619	5	-17	72	580	850	26	21	72	472	575	-69	-19	72	675	958	-83	-7	72	929	112	-50	-19	72	945	304	-24	7
73	108	862	-25	90	73	359	567	41	-19	73	787	372	26	-4	73	289	732	71	21	73	168	619	9	-17	73	579	851	25	22	73	473	574	-68	-20	73	675	958	-83	-7	73	929	112	-50	-19	73	944	304	-25	7
74	108	862	-25	90	74	359	567	41	-19	74	783	373	22	-3	74	291	731	73	20	74	168	619	9	-17	74	579	851	25	22	74	472	574	-69	-20	74	674	957	-84	-8	74	929	112	-50	-19	74	943	304	-26	7
75	110	861	-23	89	75	360	567	42	-19	75	789	376	28	0	75	311	732	93	21	75	168	619	9	-17	75	578	852	24	23	75	472	577	-69	-17	75	674	956	-84	-9	75	928	111	-51	-20	75	941	304	-28	7
76	110	861	-23	89	76	362	567	44	-19	76	791	374	30	-2	76	300	736	82	25	76	167	619	8	-17	76	577	854	23	25	76	473	577	-68	-17	76	672	954	-86	-11	76	930	113	-49	-18	76	938	304	-31	7
77	110	859	-23	87	77	362	568	44	-18	77	791	372	30	-4	77	299	737	81	26	77	168	619	9	-17	77	576	854	22	25	77	473	576	-68	-18	77	674	957	-84	-8	77	932	109	-47	-22	77	938	304	-31	7
78	110	859	-23	87	78	363	569	45	-17	78	791	371	30	-5	78	299	737	81	26	78	168	622	9	-14	78	576	854	22	25	78	473	577	-68	-17	78	674	957	-84	-8	78	930	112	-49	-19	78	935	304	-34	7
79	110	859	-23	87	79	364	569	46	-17	79	791	374	30	-2	79	299	737	81	26	79	168	623	9	-13	79	575	855	21	26	79	473	577	-68	-17	79	674	957	-84	-8	79	929	107	-50	-24	79	934	304	-35	7
80	109	862	-24	90	80	365	569	47	-17	80	791	377	30	1	80	300	733	82	22	80	166	624	7	-12	80	574	856	20	27	80	472	577	-69	-17	80	673	956	-85	-9	80	929	106	-50	-25	80	934	304	-35	7
81	109	864	-24	92	81	368	569	50	-17	81	789	378	28	2	81	302	732	84	21	81	163	627	4	-9	81	572	859	18	30	81	470	579	-71	-15	81	673	954	-85	-11	81	930	105	-49	-26	81	934	304	-35	7
82	112	870	-21	98	82	370	569	52	-17	82	789	378	28	2	82	305	732	87	21	82	163	630	4	-6	82	571	860	17	31	82	471	576	-70	-18	82	672	955	-86	-10	82	928	105	-51	-26	82	934	304	-35	7
83	116	876	-17	104	83	371	569	53	-17	83	788	378	27	2	83	306	732	88	21	83	166	632	7	-4	83	570	861	16	32	83	470	578	-71	-16	83	671	952	-87	-13	83	928	106	-51	-25	83	931	304	-38	7
84	119	876	-14	104	84	371	570	53	-16	84	787	381	26	5	84	305	732	87	21	84	167	633	8	-3	84	568	863	14	34	84	470	576	-71	-18	84	670	952	-88	-13	84	926	107	-53	-24	84	931	304	-38	7
85	119	876	-14	104	85	372	570	54	-16	85	786	383	25	7	85	303	733	85	22	85	166	635	7	-1	85	569	862	15	33	85	469	578	-72	-16	85	670	953	-88	-12	85	923	105	-56	-26	85	931	305	-38	8
86	120	878	-13	106	86	375	570	57	-16	86	786	383	25	7	86	305	733	87	22	86	166	634	7	-2	86	568	865	14	36	86	468	580	-73	-14	86	668	952	-90	-13	86	924	103	-55	-28	86	931	307	-38	10
87	121	882	-12	110	87	375	571	57	-15	87	786	383	25	7	87	306	733	88	22	87	166	633	7	-3	87	568	865	14	36	87	467	580	-74	-14	87	667	952	-91	-13	87	924	103	-55	-28	87	931	307	-38	10
88	126	892	-7	120	88	375	571	57	-15	88	786	382	25	6	88	308	734	90	23	88	166	633	7	-3	88	568	866	14	37	88	466	580	-75	-14	88	667	951	-91	-14	88	920	103	-59	-28	88	929	307	-40	10
89	134	903	1	131	89	374	572	56	-14	89	786	382	25	6	89	309	739	91	28	89	164	632	5	-4	89	568	867	14	38	89	466	579	-75	-15	89	666	951	-92	-14	89	923	102	-56	-29	89	929	307	-40	10
90	137	903	4	131	90	375	571	57	-15	90	786	383	25	7	90	313	733	95	22	90	164	632	5	-4	90	568	867	14	38	90	466	575	-75	-19	90	665	950	-93	-15	90	918	103	-61	-28	90	929	307	-40	10
91	141	903	8	131	91	376	570	58	-16	91	786	385	25	9	91	313	732	95	21	91	164	632	5	-4	91	567	869	13	40	91	465	575	-76	-19	91	666	948	-92	-17	91	921	101	-58	-30	91	929	308	-40	11
92	141	905	8	133	92	376	570	58	-16	92	788	385	27	9	92	314	731	96	20	92	166	632	7	-4	92	566	869	12	40	92	465	575	-76	-19	92	665	947	-93	-18	92	918	101	-61	-30	92	928	308	-41	11
93	144	904	11	132	93	375	570	57	-16	93	791	385	30	9	93	314	730	96	19	93	167	632	8	-4	93	566	869	12	40	93	464	576	-77	-18	93	665	946	-93	-19	93	918	100	-61	-31	93	931	311	-38	14
94	159	905	26	133	94	375	569	57	-17	94	791	385	30	9	94	315	728	97	17	94	164	635	5	-1	94	566	868	12	39	94	464	576	-77	-18	94	664	945	-94	-20	94	918	100	-61	-31	94	934	313	-35	16
95	161	915	28	143	95	376	568	58	-18	95	791	385	30	9	95	318	723	100	12	95	163	634	4	-2	95	566	869	12	40	95	463	577	-78	-17	95	662	945	-96	-20	95	916	102	-63	-29	95	937	313	-32	16
96	156	925	23	153	96	378	567	60	-19	96	792	384	31	8	96	318	716	100	5	96	163	634	4	-2	96	566	871	12	42	96	463	575	-78	-19	96	662	944	-96	-21	96	916	102	-63	-29	96	940	314	-29	17
97	143	926	10	154	97	378	565	60	-21	97	792	379	31	3	97	320	710	102	-1	97	163	634	4	-2	97	567	871	13	42	97	462	574	-79	-20	97	662	942	-96	-23	97	915	102	-64	-29	97	943	314	-26	17
98	143	926	10	154	98	379	565	61	-21	98	791	379	30	3	98	326	697	108	-14	98	163	634	4	-2	98	567	872	13	43	98	462	572	-79	-22	98	661	941	-97	-24	98	913	103	-66	-28	98	948	315	-21	18
99	154	926	21	154	99	381	564	63	-22	99	788	383	27	7	99	330	691	112	-20	99	163	634	4	-2	99	568	871	14	42	99	462	571	-79	-23	99	660	942	-98	-23	99	914	101	-65	-30	99	950	315	-19	18
100	154	926	21	154	100	383	563	65	-23	100	788	383	27	7	100	337	690	119	-21	100	163	635	4	-1	100	568	871	14	42	100	462	570	-79	-24	100	659	940	-99	-25	100	910	103	-69	-28	100	951	315	-18	18
101	152	926	19	154	101	385	562	67	-24	101	782	385	21	9	101	342	686	124	-25	101	163	636	4	0	101	568	872	14	43	101	462	571	-79	-23	101	659	938	-99	-27	101	912	103	-67	-28	101	954	315	-15	18
102	150	926	17	154	102	390	561	72	-25	102	783	387	22	11	102	344	681	126	-30	102	163	638	4	2	102	569	872	15	43	102	461	570	-80	-24	102	659	938	-99	-27	102	912	103	-67	-28	102	957	315	-12	18
103	152	926	19	154	103	392	561	74	-25	103	784	383	23	7	103	348	679	130	-32	103	157	635	-2	-1	103	569	872	15	43	103	461	569	-80	-25	103	658	937	-100	-28	103	909	105	-70	-26	103	959	317	-10	20
104	150	936	17	164	104	393	560	75	-26	104	784	383	23	7	104	349	678	131	-33	104	158	635	-1	-1	104	570	872	16	43	104	460	569	-81	-25	104	657	938	-101	-27	104	910	103	-69	-28	104	963	317	-6	20
105	150	943	17	171	105	395	559	77	-27	105	784	383	23	7	105	349	678	131	-33	105	161	636	2	0	105	570	872	16	43	105	460	568	-81	-26	105	657	937	-101	-28	105	910	103	-69	-28	105	963	317	-6	20
106	150	946	17	174	106	396	559	78	-27	106	786	383	25	7	106	347	682	129	-29	106	159	638	0	2	106	570	874	16	45	106	459	568	-82	-26	106	656	935	-102	-30	106	909	105	-70	-26	106	963	318	-6	21
107	150	949	17	177	107	400	558	82	-28	107	786	388	25	12	107	349	684	131	-27	107	158	638	-1	2	107	570	874	16	45	107	458	568	-83	-26	107	657	934	-101	-31	107	910	104	-69	-27	107	959	320	-10	23
108	153	950	20	178	108	401	558	83	-28	108	788	392	27	16	108	355	684	137	-27	108	158	638	-1	2	108	570	874	16	45	108	457	568	-84	-26	108	656	934	-102	-31	108	909	104	-70	-27	108	957	323	-12	26
109	159	953	26	181	109	403	558	85	-28	109	789	392	28	16	109	357	684	139	-27	109	158	640	-1	4	109	570	874	16	45	109	457	566	-84	-28	109	655	934	-103	-31	109	908	104	-71	-27	109	956	326	-13	29
110	159	955	26	183	110	405	557	87	-29	110	789	390	28	14	110	359	684	141	-27	110	161	642	2	6	110	570	874	16	45	110	456	567	-85	-27	110	655	934	-103	-31	110	909	102	-70	-29	110	954	326	-15	29
111	159	957	26	185	111	407	558	89	-28	111	787	389	26	13	111	360	686	142	-25	111	159	642	0	6	111	569	876	15	47	111	456	567	-85	-27	111	654	936	-104	-29	111	908	104	-71	-27	111	954	327	-15	30
112	159	959	26	187	112	409	557	91	-29	112	787	388	26	12	112	360	686	142	-25	112	157	642	-2	6	112	569	875	15	46	112	456	566	-85	-28	112	654	935	-104	-30	112	908	104	-71	-27	112	951	330	-18	33
113	166	960	33	188	113	411	558	93	-28	113	787	388	26	12	113	364	686	146	-25	113	157	642	-2	6	113	567	875	13	46	113	455	567	-86	-27	113	654	934	-104	-31	113	908	103	-71	-28	113	950	330	-19	33
114	168	959	35	187	114	414	557	96	-29	114	784	387	23	11	114	348	688	130	-23	114	156	642	-3	6	114	568	875	14	46	114	455	566	-86	-28	114	653	934	-105	-31	114	908	102	-71	-29	114	948	330	-21	33
115	168	956	35	184	115	415	557	97	-29	115	784	387	23	11	115	348	690	130	-21	115	156	642	-3	6	115	568	875	14	46	115	455	565	-86	-29	115	653	934	-105	-31	115	908	102	-71	-29	115	948	330	-21	33
116	168	957	35	185	116	417	558	99	-28	116	786	387	25	11	116	350	690	132	-21	116	156	642	-3	6	116	568	877	14	48	116	455	565	-86	-29	116	651	933	-107	-32	116	906	102	-73	-29	116	947	330	-22	33
117	171	959	38	187	117	418	558	100	-28	117	787	384	26	8	117	355	699	137	-12	117	152	644	-7	8	117	568	876	14	47	117	455	565	-86	-29	117	651	933	-107	-32	117	905	102	-74	-29	117	945	330	-24	33
118	174	959	41	187	118	418	559	100	-27	118	791	383	30	7	118	355	705	137	-6	118	152	647	-7	11	118	551	851	-3	22	118	454	565	-87	-29	118	650	932	-108	-33	118	904	102	-75	-29	118	945	330	-24	33
119	174	959	41	187	119	417	560	99	-26	119	791	382	30	6	119	353	711	135	0	119	152	649	-7	13	119	550	850	-4	21	119	453	566	-88	-28	119	650	932	-108	-33	119	904	102	-75	-29	119	945	330	-24	33
120	174	958	41	186	120	418	561	100	-25	120	786	384	25	8	120	349	716	131	5	120	152	649	-7	13	120	550	850	-4	21	120	454	567	-87	-27	120	651	932	-107	-33	120	904	102	-75	-29	120	944	330	-25	33
121	174	958	41	186	121	420	561	102	-25	121	787	383	26	7	121	348	719	130	8	121	152	650	-7	14	121	549	851	-5	22	121	455	568	-86	-26	121	649	931	-109	-34	121	901	104	-78	-27	121	943	331	-26	34
122	174	958	41	186	122	421	562	103	-24	122	787	381	26	5	122	354	721	136	10	122	151	651	-8	15	122	549	851	-5	22	122	455	569	-86	-25	122	649	932	-109	-33	122	904	103	-75	-28	122	940	333	-29	36
123	174	959	41	187	123	420	562	102	-24	123	787	379	26	3	123	354	722	136	11	123	151	653	-8	17	123	549	851	-5	22	123	456	570	-85	-24	123	650	931	-108	-34	123	904	102	-75	-29	123	937	334	-32	37
124	174	963	41	191	124	419	562	101	-24	124	786	378	25	2	124	354	716	136	5	124	151	655	-8	19	124	548	852	-6	23	124	456	571	-85	-23	124	651	931	-107	-34	124	905	102	-74	-29	124	935	334	-34	37
125	174	973	41	201	125	419	563	101	-23	125	786	378	25	2	125	354	717	136	6	125	130	663	-29	27	125	548	853	-6	24	125	456	571	-85	-23	125	649	931	-109	-34	125	903	103	-76	-28	125	931	334	-38	37
126	169	979	36	207	126	421	563	103	-23	126	786	378	25	2	126	354	719	136	8	126	130	661	-29	25	126	549	854	-5	25	126	456	571	-85	-23	126	645	934	-113	-31	126	899	105	-80	-26	126	928	336	-41	39
127	159	979	26	207	127	422	563	104	-23	127	786	378	25	2	127	353	721	135	10	127	132	657	-27	21	127	550	854	-4	25	127	457	571	-84	-23	127	647	931	-111	-34	127	900	104	-79	-27	127	927	336	-42	39
128	159	983	26	211	128	422	563	104	-23	128	787	381	26	5	128	350	722	132	11	128	133	662	-26	26	128	550	854	-4	25	128	457	574	-84	-20	128	647	930	-111	-35	128	900	104	-79	-27	128	927	337	-42	40
129	154	986	21	214	129	423	563	105	-23	129	787	383	26	7	129	349	723	131	12	129	138	658	-21	22	129	550	855	-4	26	129	458	574	-83	-20	129	648	930	-110	-35	129	901	104	-78	-27	129	927	337	-42	40
130	148	990	15	218	130	423	563	105	-23	130	787	383	26	7	130	352	725	134	14	130	143	668	-16	32	130	550	856	-4	27	130	459	575	-82	-19	130	642	934	-116	-31	130	897	105	-82	-26	130	924	339	-45	42
131	135	992	2	220	131	422	564	104	-22	131	788	378	27	2	131	355	725	137	14	131	143	669	-16	33	131	550	859	-4	30	131	460	575	-81	-19	131	639	934	-119	-31	131	898	105	-81	-26	131	924	339	-45	42
132	132	994	-1	222	132	422	564	104	-22	132	788	378	27	2	132	357	725	139	14	132	149	671	-10	35	132	551	858	-3	29	132	460	574	-81	-20	132	640	934	-118	-31	132	897	105	-82	-26	132	924	339	-45	42
133	128	997	-5	225	133	425	565	107	-21	133	787	374	26	-2	133	359	725	141	14	133	145	669	-14	33	133	552	858	-2	29	133	459	575	-82	-19	133	639	934	-119	-31	133	897	105	-82	-26	133	924	339	-45	42
134	123	996	-10	224	134	425	566	107	-20	134	787	373	26	-3	134	361	726	143	15	134	146	669	-13	33	134	552	858	-2	29	134	461	574	-80	-20	134	640	934	-118	-31	134	896	105	-83	-26	134	924	339	-45	42
135	123	993	-10	221	135	425	567	107	-19	135	789	372	28	-4	135	365	726	147	15	135	141	669	-18	33	135	551	858	-3	29	135	461	574	-80	-20	135	640	934	-118	-31	135	895	106	-84	-25	135	927	337	-42	40
136	123	993	-10	221	136	427	568	109	-18	136	793	371	32	-5	136	365	726	147	15	136	137	669	-22	33	136	554	856	0	27	136	462	575	-79	-19	136	639	933	-119	-32	136	896	106	-83	-25	136	927	337	-42	40
137	120	996	-13	224	137	427	568	109	-18	137	793	368	32	-8	137	364	727	146	16	137	134	670	-25	34	137	555	854	1	25	137	463	575	-78	-19	137	640	932	-118	-33	137	896	105	-83	-26	137	927	337	-42	40
138	123	998	-10	226	138	422	568	104	-18	138	793	365	32	-11	138	364	730	146	19	138	135	671	-24	35	138	554	853	0	24	138	463	576	-78	-18	138	638	932	-120	-33	138	893	106	-86	-25	138	925	337	-44	40
139	127	998	-6	226	139	421	570	103	-16	139	794	362	33	-14	139	364	731	146	20	139	139	673	-20	37	139	552	853	-2	24	139	463	575	-78	-19	139	638	932	-120	-33	139	894	106	-85	-25	139	925	339	-44	42
140	127	997	-6	225	140	421	569	103	-17	140	794	361	33	-15	140	367	731	149	20	140	145	673	-14	37	140	553	853	-1	24	140	462	575	-79	-19	140	639	932	-119	-33	140	893	106	-86	-25	140	925	339	-44	42
141	127	997	-6	225	141	420	570	102	-16	141	794	361	33	-15	141	371	731	153	20	141	143	669	-16	33	141	551	854	-3	25	141	461	575	-80	-19	141	638	933	-120	-32	141	892	107	-87	-24	141	924	339	-45	42
142	127	997	-6	225	142	420	571	102	-15	142	794	361	33	-15	142	371	731	153	20	142	143	665	-16	29	142	551	853	-3	24	142	460	574	-81	-20	142	638	933	-120	-32	142	892	108	-87	-23	142	919	340	-50	43
143	128	997	-5	225	143	420	571	102	-15	143	794	360	33	-16	143	373	731	155	20	143	143	663	-16	27	143	550	853	-4	24	143	459	573	-82	-21	143	639	933	-119	-32	143	892	108	-87	-23	143	922	340	-47	43
144	135	999	2	227	144	422	572	104	-14	144	794	357	33	-19	144	375	730	157	19	144	134	665	-25	29	144	548	852	-6	23	144	458	573	-83	-21	144	639	933	-119	-32	144	892	108	-87	-23	144	918	336	-51	39
145	142	999	9	227	145	422	573	104	-13	145	794	357	33	-19	145	375	730	157	19	145	130	667	-29	31	145	546	850	-8	21	145	457	573	-84	-21	145	638	933	-120	-32	145	891	109	-88	-22	145	918	336	-51	39
146	144	999	11	227	146	422	573	104	-13	146	794	356	33	-20	146	377	730	159	19	146	132	664	-27	28	146	546	850	-8	21	146	458	571	-83	-23	146	636	935	-122	-30	146	892	108	-87	-23	146	918	334	-51	37
147	146	998	13	226	147	423	574	105	-12	147	794	353	33	-23	147	382	736	164	25	147	134	665	-25	29	147	546	849	-8	20	147	458	571	-83	-23	147	637	933	-121	-32	147	892	108	-87	-23	147	918	334	-51	37
148	140	996	7	224	148	423	575	105	-11	148	794	351	33	-25	148	386	733	168	22	148	135	669	-24	33	148	546	849	-8	20	148	457	572	-84	-22	148	636	935	-122	-30	148	892	108	-87	-23	148	919	334	-50	37
149	137	996	4	224	149	423	576	105	-10	149	796	349	35	-27	149	387	733	169	22	149	138	669	-21	33	149	545	849	-9	20	149	457	577	-84	-17	149	636	935	-122	-30	149	891	109	-88	-22	149	918	337	-51	40
150	135	996	2	224	150	421	576	103	-10	150	796	345	35	-31	150	389	733	171	22	150	138	670	-21	34	150	544	849	-10	20	150	456	576	-85	-18	150	638	934	-120	-31	150	891	110	-88	-21	150	918	337	-51	40
151	134	994	1	222	151	419	577	101	-9	151	796	345	35	-31	151	399	733	181	22	151	138	664	-21	28	151	543	850	-11	21	151	457	573	-84	-21	151	635	937	-123	-28	151	890	111	-89	-20	151	915	337	-54	40
152	135	993	2	221	152	418	579	100	-7	152	796	344	35	-32	152	399	733	181	22	152	138	662	-21	26	152	543	848	-11	19	152	456	573	-85	-21	152	635	937	-123	-28	152	890	110	-89	-21	152	914	337	-55	40
153	137	993	4	221	153	416	579	98	-7	153	796	342	35	-34	153	399	728	181	17	153	135	658	-24	22	153	543	847	-11	18	153	455	572	-86	-22	153	638	934	-120	-31	153	890	110	-89	-21	153	914	336	-55	39
154	137	994	4	222	154	415	580	97	-6	154	796	341	35	-35	154	400	728	182	17	154	137	655	-22	19	154	537	839	-17	10	154	456	571	-85	-23	154	636	936	-122	-29	154	889	111	-90	-20	154	916	336	-53	39
155	137	996	4	224	155	414	580	96	-6	155	796	341	35	-35	155	400	733	182	22	155	138	655	-21	19	155	531	838	-23	9	155	457	572	-84	-22	155	635	935	-123	-30	155	888	111	-91	-20	155	918	336	-51	39
156	140	996	7	224	156	413	580	95	-6	156	797	337	36	-39	156	402	734	184	23	156	143	659	-16	23	156	529	838	-25	9	156	457	571	-84	-23	156	633	936	-125	-29	156	888	112	-91	-19	156	918	336	-51	39
157	140	996	7	224	157	412	580	94	-6	157	797	336	36	-40	157	404	734	186	23	157	145	664	-14	28	157	532	837	-22	8	157	458	571	-83	-23	157	635	934	-123	-31	157	887	112	-92	-19	157	918	334	-51	37
158	139	996	6	224	158	412	580	94	-6	158	798	334	37	-42	158	404	736	186	25	158	146	664	-13	28	158	530	835	-24	6	158	457	571	-84	-23	158	632	936	-126	-29	158	887	111	-92	-20	158	918	333	-51	36
159	139	996	6	224	159	410	580	92	-6	159	796	333	35	-43	159	404	737	186	26	159	141	665	-18	29	159	529	834	-25	5	159	458	569	-83	-25	159	631	936	-127	-29	159	886	112	-93	-19	159	915	333	-54	36
160	137	996	4	224	160	409	581	91	-5	160	791	331	30	-45	160	401	738	183	27	160	143	663	-16	27	160	527	834	-27	5	160	458	570	-83	-24	160	631	936	-127	-29	160	885	112	-94	-19	160	912	336	-57	39
161	136	996	3	224	161	407	582	89	-4	161	783	328	22	-48	161	401	738	183	27	161	145	663	-14	27	161	527	834	-27	5	161	459	567	-82	-27	161	628	937	-130	-28	161	884	112	-95	-19	161	909	337	-60	40
162	137	992	4	220	162	406	583	88	-3	162	782	328	21	-48	162	401	738	183	27	162	145	664	-14	28	162	526	834	-28	5	162	459	567	-82	-27	162	629	937	-129	-28	162	885	112	-94	-19	162	909	337	-60	40
163	136	991	3	219	163	404	585	86	-1	163	782	328	21	-48	163	404	736	186	25	163	144	664	-15	28	163	525	833	-29	4	163	458	566	-83	-28	163	629	937	-129	-28	163	884	112	-95	-19	163	909	337	-60	40
164	139	991	6	219	164	404	585	86	-1	164	782	329	21	-47	164	405	732	187	21	164	139	663	-20	27	164	522	833	-32	4	164	458	566	-83	-28	164	630	937	-128	-28	164	885	111	-94	-20	164	909	337	-60	40
165	139	991	6	219	165	403	586	85	0	165	783	331	22	-45	165	407	730	189	19	165	139	663	-20	27	165	516	832	-38	3	165	458	566	-83	-28	165	631	936	-127	-29	165	884	113	-95	-18	165	908	337	-61	40
166	139	991	6	219	166	403	588	85	2	166	786	330	25	-46	166	409	727	191	16	166	137	665	-22	29	166	516	833	-38	4	166	458	565	-83	-29	166	629	936	-129	-29	166	883	113	-96	-18	166	902	337	-67	40
167	139	991	6	219	167	402	589	84	3	167	786	329	25	-47	167	409	727	191	16	167	138	668	-21	32	167	514	832	-40	3	167	458	565	-83	-29	167	630	936	-128	-29	167	884	111	-95	-20	167	902	337	-67	40
168	139	991	6	219	168	401	590	83	4	168	784	329	23	-47	168	409	727	191	16	168	138	668	-21	32	168	513	831	-41	2	168	458	565	-83	-29	168	630	935	-128	-30	168	883	112	-96	-19	168	903	336	-66	39
169	137	990	4	218	169	400	591	82	5	169	781	325	20	-51	169	405	727	187	16	169	138	669	-21	33	169	511	831	-43	2	169	458	565	-83	-29	169	630	936	-128	-29	169	883	112	-96	-19	169	903	336	-66	39
170	137	990	4	218	170	399	592	81	6	170	781	325	20	-51	170	404	727	186	16	170	135	667	-24	31	170	510	830	-44	1	170	457	565	-84	-29	170	629	937	-129	-28	170	882	114	-97	-17	170	900	336	-69	39
171	137	990	4	218	171	398	594	80	8	171	781	325	20	-51	171	404	727	186	16	171	138	665	-21	29	171	511	831	-43	2	171	457	565	-84	-29	171	628	938	-130	-27	171	880	114	-99	-17	171	898	336	-71	39
172	137	990	4	218	172	396	594	78	8	172	778	325	17	-51	172	404	727	186	16	172	140	664	-19	28	172	509	830	-45	1	172	457	565	-84	-29	172	628	938	-130	-27	172	876	114	-103	-17	172	898	336	-71	39
173	137	990	4	218	173	394	594	76	8	173	773	324	12	-52	173	404	725	186	14	173	141	662	-18	26	173	506	829	-48	0	173	457	565	-84	-29	173	627	938	-131	-27	173	875	113	-104	-18	173	898	336	-71	39
174	134	991	1	219	174	393	595	75	9	174	773	325	12	-51	174	405	725	187	14	174	143	658	-16	22	174	506	829	-48	0	174	457	564	-84	-30	174	627	937	-131	-28	174	873	113	-106	-18	174	898	336	-71	39
175	132	992	-1	220	175	391	596	73	10	175	772	326	11	-50	175	405	725	187	14	175	143	656	-16	20	175	502	828	-52	-1	175	457	562	-84	-32	175	626	937	-132	-28	175	872	112	-107	-19	175	896	336	-73	39
176	130	992	-3	220	176	390	598	72	12	176	770	326	9	-50	176	405	723	187	12	176	145	656	-14	20	176	503	828	-51	-1	176	457	561	-84	-33	176	625	938	-133	-27	176	871	112	-108	-19	176	895	336	-74	39
177	130	992	-3	220	177	390	598	72	12	177	770	326	9	-50	177	409	720	191	9	177	149	657	-10	21	177	502	828	-52	-1	177	456	560	-85	-34	177	625	938	-133	-27	177	870	113	-109	-18	177	893	336	-76	39
178	129	992	-4	220	178	389	599	71	13	178	771	326	10	-50	178	411	716	193	5	178	143	658	-16	22	178	501	827	-53	-2	178	457	559	-84	-35	178	624	937	-134	-28	178	869	112	-110	-19	178	893	334	-76	37
179	129	992	-4	220	179	389	599	71	13	179	772	326	11	-50	179	411	716	193	5	179	143	659	-16	23	179	500	827	-54	-2	179	458	560	-83	-34	179	624	937	-134	-28	179	868	111	-111	-20	179	895	331	-74	34
180	127	989	-6	217	180	387	600	69	14	180	772	325	11	-51	180	411	715	193	4	180	140	659	-19	23	180	499	827	-55	-2	180	459	559	-82	-35	180	625	937	-133	-28	180	867	110	-112	-21	180	898	327	-71	30
181	127	987	-6	215	181	386	601	68	15	181	772	321	11	-55	181	413	713	195	2	181	139	661	-20	25	181	499	828	-55	-1	181	459	559	-82	-35	181	624	938	-134	-27	181	867	110	-112	-21	181	899	324	-70	27
182	127	987	-6	215	182	385	600	67	14	182	772	320	11	-56	182	413	709	195	-2	182	139	663	-20	27	182	498	827	-56	-2	182	458	559	-83	-35	182	624	937	-134	-28	182	867	109	-112	-22	182	899	323	-70	26
183	126	987	-7	215	183	383	600	65	14	183	768	318	7	-58	183	413	705	195	-6	183	139	664	-20	28	183	497	827	-57	-2	183	460	557	-81	-37	183	622	937	-136	-28	183	865	108	-114	-23	183	902	321	-67	24
184	126	990	-7	218	184	382	600	64	14	184	768	315	7	-61	184	409	699	191	-12	184	138	664	-21	28	184	495	826	-59	-3	184	459	557	-82	-37	184	619	936	-139	-29	184	862	108	-117	-23	184	902	321	-67	24
185	121	991	-12	219	185	380	599	62	13	185	768	314	7	-62	185	407	698	189	-13	185	139	662	-20	26	185	493	826	-61	-3	185	460	554	-81	-40	185	621	936	-137	-29	185	855	107	-124	-24	185	902	323	-67	26
186	120	990	-13	218	186	379	600	61	14	186	770	313	9	-63	186	405	694	187	-17	186	140	662	-19	26	186	492	827	-62	-2	186	461	552	-80	-42	186	616	936	-142	-29	186	852	108	-127	-23	186	900	323	-69	26
187	119	987	-14	215	187	377	599	59	13	187	781	302	20	-74	187	404	693	186	-18	187	141	662	-18	26	187	492	826	-62	-3	187	462	552	-79	-42	187	607	943	-151	-22	187	848	107	-131	-24	187	895	323	-74	26
188	119	986	-14	214	188	376	599	58	13	188	781	298	20	-78	188	402	690	184	-21	188	134	662	-25	26	188	490	826	-64	-3	188	462	552	-79	-42	188	605	942	-153	-23	188	845	107	-134	-24	188	896	323	-73	26
189	117	986	-16	214	189	375	598	57	12	189	782	298	21	-78	189	401	690	183	-21	189	133	662	-26	26	189	490	825	-64	-4	189	461	551	-80	-43	189	602	943	-156	-22	189	842	106	-137	-25	189	902	327	-67	30
190	115	986	-18	214	190	374	598	56	12	190	786	294	25	-82	190	401	688	183	-23	190	130	661	-29	25	190	488	825	-66	-4	190	458	550	-83	-44	190	601	942	-157	-23	190	835	111	-144	-20	190	903	327	-66	30
191	114	986	-19	214	191	373	599	55	13	191	792	293	31	-83	191	401	687	183	-24	191	129	659	-30	23	191	488	826	-66	-3	191	460	551	-81	-43	191	599	942	-159	-23	191	836	110	-143	-21	191	902	327	-67	30
192	110	983	-23	211	192	372	598	54	12	192	809	301	48	-75	192	402	685	184	-26	192	129	658	-30	22	192	485	825	-69	-4	192	460	550	-81	-44	192	599	942	-159	-23	192	832	110	-147	-21	192	899	329	-70	32
193	110	984	-23	212	193	371	598	53	12	193	814	304	53	-72	193	402	684	184	-27	193	129	658	-30	22	193	484	825	-70	-4	193	460	550	-81	-44	193	588	949	-170	-16	193	829	109	-150	-22	193	899	330	-70	33
194	112	986	-21	214	194	369	598	51	12	194	814	304	53	-72	194	404	684	186	-27	194	115	657	-44	21	194	481	824	-73	-5	194	461	548	-80	-46	194	587	950	-171	-15	194	829	110	-150	-21	194	892	333	-77	36
195	112	986	-21	214	195	368	597	50	11	195	818	305	57	-71	195	406	682	188	-29	195	110	653	-49	17	195	477	824	-77	-5	195	461	549	-80	-45	195	599	942	-159	-23	195	827	110	-152	-21	195	889	336	-80	39
196	110	986	-23	214	196	366	598	48	12	196	819	305	58	-71	196	409	681	191	-30	196	110	652	-49	16	196	473	825	-81	-4	196	460	548	-81	-46	196	598	942	-160	-23	196	827	108	-152	-23	196	887	340	-82	43
197	110	986	-23	214	197	365	597	47	11	197	815	305	54	-71	197	413	681	195	-30	197	107	653	-52	17	197	473	825	-81	-4	197	460	548	-81	-46	197	598	942	-160	-23	197	827	108	-152	-23	197	887	344	-82	47
198	109	985	-24	213	198	364	597	46	11	198	815	307	54	-69	198	413	681	195	-30	198	104	653	-55	17	198	472	825	-82	-4	198	460	546	-81	-48	198	598	942	-160	-23	198	826	108	-153	-23	198	890	346	-79	49
199	109	985	-24	213	199	362	597	44	11	199	815	310	54	-66	199	413	678	195	-33	199	94	656	-65	20	199	471	825	-83	-4	199	460	546	-81	-48	199	598	942	-160	-23	199	826	108	-153	-23	199	896	346	-73	49
200	109	985	-24	213	200	361	597	43	11	200	816	310	55	-66	200	415	676	197	-35	200	87	657	-72	21	200	470	825	-84	-4	200	460	545	-81	-49	200	597	942	-161	-23	200	826	108	-153	-23	200	898	346	-71	49
[truncated: 130 more columns]

## Sheet: 2B - cKO Trajectories
Plotted Trajectories for Figure 2B and Supp Fig 3. Relative X and Relative Y are seen plotted for each trajectory
Cell 1					Cell 2					Cell 3					Cell 4					Cell 5					Cell 6					Cell 7					Cell 8					Cell 9					Cell 10
Frame	X Position	Y Position	relative X	relative Y	Frame	X Position	Y Position	relative X	relative Y	Frame	X Position	Y Position	relative X	relative Y	Frame	X Position	Y Position	relative X	relative Y	Frame	X Position	Y Position	relative X	relative Y	Frame	X Position	Y Position	relative X	relative Y	Frame	X Position	Y Position	relative X	relative Y	Frame	X Position	Y Position	relative X	relative Y	Frame	X Position	Y Position	relative X	relative Y	Frame	X Position	Y Position	relative X	relative Y
1	470	537			1	104	591	0	0	1	444	591	0	0	1	484	480	0	0	1	557	545	0	0	1	224	677	0	0	1	511	420	0	0	1	461	401	0	0	1	336	733	0	0	1	911	299	0	0
2	470	537	0	0	2	105	591	1	0	2	444	592	0	1	2	484	479	0	-1	2	556	545	-1	0	2	226	678	2	1	2	511	420	0	0	2	461	397	0	-4	2	338	732	2	-1	2	914	301	3	2
3	470	538	0	1	3	105	590	1	-1	3	444	593	0	2	3	485	483	1	3	3	555	546	-2	1	3	227	678	3	1	3	505	419	-6	-1	3	464	392	3	-9	3	338	731	2	-2	3	918	301	7	2
4	470	539	0	2	4	106	590	2	-1	4	444	596	0	5	4	483	488	-1	8	4	555	547	-2	2	4	233	688	9	11	4	503	419	-8	-1	4	468	390	7	-11	4	340	729	4	-4	4	918	301	7	2
5	470	540	0	3	5	106	590	2	-1	5	445	591	1	0	5	480	491	-4	11	5	554	547	-3	2	5	233	689	9	12	5	503	419	-8	-1	5	469	388	8	-13	5	338	734	2	1	5	922	300	11	1
6	469	543	-1	6	6	107	590	3	-1	6	444	591	0	0	6	477	494	-7	14	6	551	549	-6	4	6	230	691	6	14	6	499	419	-12	-1	6	463	382	2	-19	6	339	741	3	8	6	925	300	14	1
7	470	544	0	7	7	106	591	2	0	7	443	593	-1	2	7	471	493	-13	13	7	550	549	-7	4	7	229	690	5	13	7	493	421	-18	1	7	461	380	0	-21	7	338	746	2	13	7	928	303	17	4
8	471	545	1	8	8	106	592	2	1	8	443	595	-1	4	8	465	502	-19	22	8	547	549	-10	4	8	229	689	5	12	8	502	422	-9	2	8	461	375	0	-26	8	327	754	-9	21	8	932	305	21	6
9	471	547	1	10	9	105	593	1	2	9	444	596	0	5	9	456	505	-28	25	9	547	550	-10	5	9	230	687	6	10	9	495	424	-16	4	9	461	370	0	-31	9	325	757	-11	24	9	936	312	25	13
10	470	551	0	14	10	105	594	1	3	10	443	596	-1	5	10	453	506	-31	26	10	547	549	-10	4	10	230	686	6	9	10	491	422	-20	2	10	460	366	-1	-35	10	319	754	-17	21	10	936	312	25	13
11	468	554	-2	17	11	105	596	1	5	11	444	598	0	7	11	462	507	-22	27	11	549	549	-8	4	11	231	686	7	9	11	483	418	-28	-2	11	457	365	-4	-36	11	314	741	-22	8	11	930	303	19	4
12	467	557	-3	20	12	104	597	0	6	12	444	597	0	6	12	460	509	-24	29	12	546	549	-11	4	12	231	683	7	6	12	502	427	-9	7	12	456	362	-5	-39	12	314	738	-22	5	12	932	303	21	4
13	465	561	-5	24	13	104	598	0	7	13	443	597	-1	6	13	461	511	-23	31	13	547	549	-10	4	13	231	682	7	5	13	502	425	-9	5	13	458	352	-3	-49	13	315	736	-21	3	13	932	303	21	4
14	461	565	-9	28	14	104	598	0	7	14	443	597	-1	6	14	459	515	-25	35	14	548	549	-9	4	14	233	682	9	5	14	495	422	-16	2	14	453	341	-8	-60	14	315	733	-21	0	14	931	301	20	2
15	461	567	-9	30	15	104	599	0	8	15	442	597	-2	6	15	456	518	-28	38	15	550	549	-7	4	15	234	682	10	5	15	495	422	-16	2	15	449	333	-12	-68	15	319	733	-17	0	15	936	303	25	4
16	460	572	-10	35	16	103	599	-1	8	16	442	597	-2	6	16	455	522	-29	42	16	549	549	-8	4	16	235	681	11	4	16	484	420	-27	0	16	450	330	-11	-71	16	331	728	-5	-5	16	959	317	48	18
17	460	575	-10	38	17	103	600	-1	9	17	443	598	-1	7	17	455	527	-29	47	17	549	551	-8	6	17	237	681	13	4	17	484	418	-27	-2	17	449	327	-12	-74	17	334	725	-2	-8	17	961	317	50	18
18	460	577	-10	40	18	102	600	-2	9	18	442	598	-2	7	18	457	531	-27	51	18	550	550	-7	5	18	240	681	16	4	18	484	413	-27	-7	18	447	321	-14	-80	18	335	723	-1	-10	18	965	317	54	18
19	460	579	-10	42	19	102	601	-2	10	19	441	598	-3	7	19	462	529	-22	49	19	550	550	-7	5	19	243	680	19	3	19	483	406	-28	-14	19	444	317	-17	-84	19	336	717	0	-16	19	970	317	59	18
20	460	582	-10	45	20	102	601	-2	10	20	443	598	-1	7	20	467	525	-17	45	20	551	548	-6	3	20	245	680	21	3	20	507	416	-4	-4	20	443	312	-18	-89	20	355	711	19	-22	20	950	317	39	18
21	461	585	-9	48	21	101	602	-3	11	21	441	598	-3	7	21	472	525	-12	45	21	552	548	-5	3	21	248	680	24	3	21	510	422	-1	2	21	444	310	-17	-91	21	357	711	21	-22	21	949	317	38	18
22	461	586	-9	49	22	100	602	-4	11	22	441	600	-3	9	22	473	526	-11	46	22	551	551	-6	6	22	252	677	28	0	22	509	422	-2	2	22	442	306	-19	-95	22	376	716	40	-17	22	954	322	43	23
23	460	588	-10	51	23	99	604	-5	13	23	441	599	-3	8	23	476	524	-8	44	23	548	551	-9	6	23	254	677	30	0	23	495	415	-16	-5	23	441	305	-20	-96	23	369	708	33	-25	23	958	331	47	32
24	460	589	-10	52	24	98	608	-6	17	24	443	600	-1	9	24	478	522	-6	42	24	541	550	-16	5	24	256	678	32	1	24	483	410	-28	-10	24	440	307	-21	-94	24	360	696	24	-37	24	955	332	44	33
25	460	590	-10	53	25	97	609	-7	18	25	443	601	-1	10	25	478	522	-6	42	25	538	549	-19	4	25	258	679	34	2	25	476	404	-35	-16	25	438	306	-23	-95	25	361	686	25	-47	25	949	332	38	33
26	462	591	-8	54	26	97	611	-7	20	26	445	603	1	12	26	476	522	-8	42	26	535	548	-22	3	26	262	679	38	2	26	472	400	-39	-20	26	440	305	-21	-96	26	361	678	25	-55	26	942	323	31	24
27	462	591	-8	54	27	98	614	-6	23	27	445	603	1	12	27	470	521	-14	41	27	533	548	-24	3	27	261	683	37	6	27	472	400	-39	-20	27	440	305	-21	-96	27	347	670	11	-63	27	933	296	22	-3
28	461	591	-9	54	28	97	615	-7	24	28	443	604	-1	13	28	470	509	-14	29	28	530	549	-27	4	28	265	682	41	5	28	458	397	-53	-23	28	439	310	-22	-91	28	334	685	-2	-48	28	937	298	26	-1
29	462	591	-8	54	29	98	619	-6	28	29	442	600	-2	9	29	501	511	17	31	29	529	550	-28	5	29	267	683	43	6	29	458	397	-53	-23	29	436	312	-25	-89	29	331	690	-5	-43	29	937	299	26	0
30	461	591	-9	54	30	99	620	-5	29	30	442	604	-2	13	30	496	518	12	38	30	529	553	-28	8	30	270	680	46	3	30	458	397	-53	-23	30	433	312	-28	-89	30	330	699	-6	-34	30	939	300	28	1
31	462	593	-8	56	31	100	621	-4	30	31	442	604	-2	13	31	492	521	8	41	31	528	553	-29	8	31	273	679	49	2	31	458	397	-53	-23	31	433	308	-28	-93	31	327	700	-9	-33	31	940	298	29	-1
32	462	593	-8	56	32	103	624	-1	33	32	442	603	-2	12	32	487	528	3	48	32	527	552	-30	7	32	277	677	53	0	32	453	395	-58	-25	32	435	303	-26	-98	32	322	700	-14	-33	32	937	298	26	-1
33	461	594	-9	57	33	104	623	0	32	33	445	602	1	11	33	507	532	23	52	33	528	548	-29	3	33	279	678	55	1	33	444	389	-67	-31	33	435	300	-26	-101	33	342	700	6	-33	33	932	298	21	-1
34	461	594	-9	57	34	106	626	2	35	34	446	601	2	10	34	509	533	25	53	34	528	546	-29	1	34	282	679	58	2	34	444	389	-67	-31	34	434	298	-27	-103	34	346	698	10	-35	34	931	296	20	-3
35	460	594	-10	57	35	107	626	3	35	35	445	600	1	9	35	500	517	16	37	35	526	539	-31	-6	35	285	680	61	3	35	446	389	-65	-31	35	432	294	-29	-107	35	340	696	4	-37	35	930	296	19	-3
36	459	595	-11	58	36	109	627	5	36	36	444	601	0	10	36	500	517	16	37	36	524	535	-33	-10	36	288	683	64	6	36	446	389	-65	-31	36	427	292	-34	-109	36	329	696	-7	-37	36	928	300	17	1
37	459	595	-11	58	37	110	625	6	34	37	442	601	-2	10	37	501	518	17	38	37	523	535	-34	-10	37	290	686	66	9	37	447	389	-64	-31	37	425	288	-36	-113	37	325	702	-11	-31	37	930	312	19	13
38	459	596	-11	59	38	109	626	5	35	38	443	602	-1	11	38	501	516	17	36	38	524	534	-33	-11	38	292	687	68	10	38	448	390	-63	-30	38	425	285	-36	-116	38	327	702	-9	-31	38	932	318	21	19
39	458	596	-12	59	39	110	627	6	36	39	443	601	-1	10	39	502	516	18	36	39	524	532	-33	-13	39	295	687	71	10	39	450	390	-61	-30	39	426	280	-35	-121	39	344	702	8	-31	39	932	318	21	19
40	458	596	-12	59	40	111	627	7	36	40	447	603	3	12	40	502	516	18	36	40	523	531	-34	-14	40	300	684	76	7	40	450	390	-61	-30	40	424	278	-37	-123	40	340	704	4	-29	40	932	318	21	19
41	457	597	-13	60	41	110	630	6	39	41	446	605	2	14	41	500	518	16	38	41	520	531	-37	-14	41	303	685	79	8	41	450	389	-61	-31	41	421	275	-40	-126	41	334	707	-2	-26	41	931	319	20	20
42	458	596	-12	59	42	112	630	8	39	42	443	605	-1	14	42	500	516	16	36	42	520	530	-37	-15	42	308	678	84	1	42	450	389	-61	-31	42	417	276	-44	-125	42	335	714	-1	-19	42	925	319	14	20
43	457	597	-13	60	43	113	630	9	39	43	445	603	1	12	43	498	517	14	37	43	519	532	-38	-13	43	314	670	90	-7	43	450	389	-61	-31	43	413	279	-48	-122	43	335	716	-1	-17	43	918	319	7	20
44	457	597	-13	60	44	113	630	9	39	44	445	604	1	13	44	497	518	13	38	44	519	534	-38	-11	44	318	679	94	2	44	450	389	-61	-31	44	411	281	-50	-120	44	329	723	-7	-10	44	916	319	5	20
45	457	597	-13	60	45	114	631	10	40	45	445	603	1	12	45	523	526	39	46	45	519	534	-38	-11	45	315	692	91	15	45	450	389	-61	-31	45	408	280	-53	-121	45	298	748	-38	15	45	913	321	2	22
46	454	600	-16	63	46	117	632	13	41	46	445	603	1	12	46	523	524	39	44	46	520	525	-37	-20	46	318	691	94	14	46	450	389	-61	-31	46	404	281	-57	-120	46	297	750	-39	17	46	912	324	1	25
47	453	600	-17	63	47	116	635	12	44	47	444	602	0	11	47	524	524	40	44	47	521	523	-36	-22	47	322	690	98	13	47	450	389	-61	-31	47	402	280	-59	-121	47	296	757	-40	24	47	911	326	0	27
48	453	600	-17	63	48	117	634	13	43	48	442	605	-2	14	48	524	526	40	46	48	490	502	-67	-43	48	325	690	101	13	48	450	389	-61	-31	48	400	279	-61	-122	48	294	766	-42	33	48	908	323	-3	24
49	453	600	-17	63	49	118	632	14	41	49	444	605	0	14	49	535	515	51	35	49	458	516	-99	-29	49	329	691	105	14	49	450	385	-61	-35	49	397	277	-64	-124	49	294	772	-42	39	49	913	324	2	25
50	452	601	-18	64	50	118	635	14	44	50	448	603	4	12	50	567	527	83	47	50	448	501	-109	-44	50	332	692	108	15	50	450	383	-61	-37	50	394	272	-67	-129	50	302	779	-34	46	50	914	330	3	31
51	449	604	-21	67	51	120	634	16	43	51	448	603	4	12	51	533	493	49	13	51	450	500	-107	-45	51	335	691	111	14	51	448	379	-63	-41	51	390	268	-71	-133	51	294	787	-42	54	51	912	333	1	34
52	448	604	-22	67	52	121	633	17	42	52	448	602	4	11	52	504	514	20	34	52	449	501	-108	-44	52	338	693	114	16	52	430	370	-81	-50	52	382	263	-79	-138	52	276	782	-60	49	52	909	338	-2	39
53	448	604	-22	67	53	121	634	17	43	53	447	602	3	11	53	505	518	21	38	53	449	498	-108	-47	53	341	693	117	16	53	428	369	-83	-51	53	374	260	-87	-141	53	274	779	-62	46	53	909	338	-2	39
54	448	603	-22	66	54	122	634	18	43	54	446	601	2	10	54	513	522	29	42	54	447	496	-110	-49	54	344	691	120	14	54	422	363	-89	-57	54	368	256	-93	-145	54	279	774	-57	41	54	918	337	7	38
55	448	603	-22	66	55	123	633	19	42	55	447	601	3	10	55	519	521	35	41	55	443	495	-114	-50	55	346	688	122	11	55	422	363	-89	-57	55	366	246	-95	-155	55	285	769	-51	36	55	925	333	14	34
56	446	606	-24	69	56	124	630	20	39	56	447	604	3	13	56	518	526	34	46	56	440	495	-117	-50	56	348	690	124	13	56	430	359	-81	-61	56	366	240	-95	-161	56	292	763	-44	30	56	925	331	14	32
57	447	605	-23	68	57	126	630	22	39	57	446	605	2	14	57	518	527	34	47	57	439	494	-118	-51	57	349	688	125	11	57	428	352	-83	-68	57	370	232	-91	-169	57	292	761	-44	28	57	917	327	6	28
58	446	606	-24	69	58	127	630	23	39	58	445	604	1	13	58	518	530	34	50	58	439	492	-118	-53	58	348	688	124	11	58	427	351	-84	-69	58	372	226	-89	-175	58	292	761	-44	28	58	917	323	6	24
59	446	606	-24	69	59	127	630	23	39	59	446	605	2	14	59	518	531	34	51	59	440	490	-117	-55	59	345	687	121	10	59	425	351	-86	-69	59	373	220	-88	-181	59	287	755	-49	22	59	917	322	6	23
60	446	606	-24	69	60	122	632	18	41	60	446	605	2	14	60	517	531	33	51	60	436	496	-121	-49	60	346	685	122	8	60	428	346	-83	-74	60	375	214	-86	-187	60	287	755	-49	22	60	911	315	0	16
61	445	607	-25	70	61	124	635	20	44	61	447	605	3	14	61	521	529	37	49	61	431	504	-126	-41	61	346	683	122	6	61	429	344	-82	-76	61	377	211	-84	-190	61	283	750	-53	17	61	903	314	-8	15
62	444	608	-26	71	62	120	632	16	41	62	447	605	3	14	62	521	528	37	48	62	427	491	-130	-54	62	348	681	124	4	62	419	330	-92	-90	62	379	206	-82	-195	62	284	748	-52	15	62	900	314	-11	15
63	444	608	-26	71	63	120	632	16	41	63	446	606	2	15	63	521	528	37	48	63	421	490	-136	-55	63	347	678	123	1	63	439	336	-72	-84	63	380	200	-81	-201	63	302	748	-34	15	63	899	314	-12	15
64	444	607	-26	70	64	121	632	17	41	64	446	607	2	16	64	515	533	31	53	64	417	493	-140	-52	64	346	675	122	-2	64	439	333	-72	-87	64	377	195	-84	-206	64	302	744	-34	11	64	899	313	-12	14
65	443	608	-27	71	65	121	632	17	41	65	444	605	0	14	65	511	535	27	55	65	415	492	-142	-53	65	344	674	120	-3	65	437	328	-74	-92	65	379	188	-82	-213	65	300	734	-36	1	65	902	313	-9	14
66	442	610	-28	73	66	120	634	16	43	66	443	606	-1	15	66	511	536	27	56	66	413	489	-144	-56	66	347	673	123	-4	66	440	326	-71	-94	66	380	181	-81	-220	66	294	717	-42	-16	66	908	313	-3	14
67	443	609	-27	72	67	120	632	16	41	67	441	608	-3	17	67	511	536	27	56	67	411	487	-146	-58	67	348	671	124	-6	67	443	326	-68	-94	67	379	174	-82	-227	67	293	704	-43	-29	67	907	312	-4	13
68	442	610	-28	73	68	119	631	15	40	68	441	609	-3	18	68	511	534	27	54	68	409	484	-148	-61	68	348	671	124	-6	68	443	332	-68	-88	68	378	167	-83	-234	68	288	695	-48	-38	68	905	310	-6	11
69	442	611	-28	74	69	122	629	18	38	69	440	608	-4	17	69	502	541	18	61	69	407	481	-150	-64	69	348	670	124	-7	69	441	332	-70	-88	69	376	161	-85	-240	69	281	691	-55	-42	69	903	310	-8	11
70	442	611	-28	74	70	121	631	17	40	70	443	610	-1	19	70	503	541	19	61	70	405	478	-152	-67	70	349	669	125	-8	70	439	334	-72	-86	70	377	156	-84	-245	70	281	691	-55	-42	70	903	313	-8	14
71	442	612	-28	75	71	121	632	17	41	71	444	613	0	22	71	503	540	19	60	71	407	474	-150	-71	71	348	669	124	-8	71	437	335	-74	-85	71	378	153	-83	-248	71	291	687	-45	-46	71	913	319	2	20
72	442	612	-28	75	72	121	630	17	39	72	445	614	1	23	72	500	538	16	58	72	407	474	-150	-71	72	348	667	124	-10	72	439	335	-72	-85	72	377	151	-84	-250	72	297	686	-39	-47	72	913	315	2	16
73	442	612	-28	75	73	122	630	18	39	73	444	615	0	24	73	496	539	12	59	73	412	469	-145	-76	73	347	665	123	-12	73	439	334	-72	-86	73	375	149	-86	-252	73	301	683	-35	-50	73	919	317	8	18
74	442	612	-28	75	74	122	631	18	40	74	443	615	-1	24	74	495	540	11	60	74	415	461	-142	-84	74	347	663	123	-14	74	437	334	-74	-86	74	372	145	-89	-256	74	313	682	-23	-51	74	923	318	12	19
75	442	612	-28	75	75	122	631	18	40	75	443	616	-1	25	75	491	547	7	67	75	415	456	-142	-89	75	346	662	122	-15	75	435	334	-76	-86	75	380	144	-81	-257	75	317	681	-19	-52	75	923	323	12	24
76	442	614	-28	77	76	122	632	18	41	76	442	617	-2	26	76	490	554	6	74	76	415	456	-142	-89	76	346	661	122	-16	76	433	334	-78	-86	76	378	143	-83	-258	76	311	678	-25	-55	76	922	324	11	25
77	442	614	-28	77	77	122	631	18	40	77	441	618	-3	27	77	490	559	6	79	77	412	456	-145	-89	77	346	658	122	-19	77	430	335	-81	-85	77	378	141	-83	-260	77	305	674	-31	-59	77	921	326	10	27
78	442	615	-28	78	78	122	631	18	40	78	441	617	-3	26	78	491	563	7	83	78	408	456	-149	-89	78	345	655	121	-22	78	428	336	-83	-84	78	376	141	-85	-260	78	302	674	-34	-59	78	923	324	12	25
79	442	616	-28	79	79	122	630	18	39	79	441	619	-3	28	79	490	565	6	85	79	405	458	-152	-87	79	343	654	119	-23	79	425	338	-86	-82	79	381	141	-80	-260	79	302	670	-34	-63	79	921	327	10	28
80	442	616	-28	79	80	122	630	18	39	80	441	620	-3	29	80	489	565	5	85	80	404	462	-153	-83	80	341	651	117	-26	80	425	338	-86	-82	80	385	137	-76	-264	80	310	670	-26	-63	80	919	330	8	31
81	441	619	-29	82	81	122	631	18	40	81	440	619	-4	28	81	493	568	9	88	81	404	461	-153	-84	81	338	650	114	-27	81	424	340	-87	-80	81	385	136	-76	-265	81	319	677	-17	-56	81	919	330	8	31
82	442	619	-28	82	82	122	632	18	41	82	442	622	-2	31	82	498	570	14	90	82	404	463	-153	-82	82	337	647	113	-30	82	413	340	-98	-80	82	384	136	-77	-265	82	319	678	-17	-55	82	925	322	14	23
83	441	620	-29	83	83	121	631	17	40	83	443	622	-1	31	83	496	564	12	84	83	405	460	-152	-85	83	336	642	112	-35	83	411	341	-100	-79	83	383	135	-78	-266	83	318	678	-18	-55	83	925	322	14	23
84	441	620	-29	83	84	122	630	18	39	84	442	621	-2	30	84	495	563	11	83	84	406	456	-151	-89	84	335	639	111	-38	84	407	344	-104	-76	84	386	127	-75	-274	84	315	678	-21	-55	84	923	317	12	18
85	440	620	-30	83	85	122	629	18	38	85	443	622	-1	31	85	499	561	15	81	85	405	456	-152	-89	85	333	636	109	-41	85	405	348	-106	-72	85	388	131	-73	-270	85	314	677	-22	-56	85	925	317	14	18
86	439	621	-31	84	86	123	629	19	38	86	445	622	1	31	86	503	559	19	79	86	406	455	-151	-90	86	332	632	108	-45	86	402	353	-109	-67	86	392	130	-69	-271	86	314	673	-22	-60	86	926	326	15	27
87	439	620	-31	83	87	122	629	18	38	87	445	621	1	30	87	502	557	18	77	87	406	452	-151	-93	87	330	629	106	-48	87	396	354	-115	-66	87	394	131	-67	-270	87	318	670	-18	-63	87	925	326	14	27
88	440	619	-30	82	88	122	628	18	37	88	447	622	3	31	88	501	554	17	74	88	407	452	-150	-93	88	326	627	102	-50	88	393	358	-118	-62	88	392	137	-69	-264	88	322	669	-14	-64	88	909	322	-2	23
89	438	620	-32	83	89	121	628	17	37	89	447	622	3	31	89	498	560	14	80	89	408	445	-149	-100	89	324	624	100	-53	89	391	360	-120	-60	89	393	141	-68	-260	89	323	672	-13	-61	89	908	321	-3	22
90	437	621	-33	84	90	122	627	18	36	90	443	621	-1	30	90	492	566	8	86	90	407	443	-150	-102	90	322	621	98	-56	90	388	366	-123	-54	90	384	149	-77	-252	90	323	672	-13	-61	90	909	321	-2	22
91	437	620	-33	83	91	122	627	18	36	91	443	619	-1	28	91	491	570	7	90	91	405	442	-152	-103	91	320	620	96	-57	91	382	370	-129	-50	91	388	151	-73	-250	91	323	676	-13	-57	91	917	319	6	20
92	438	621	-32	84	92	123	624	19	33	92	442	620	-2	29	92	487	572	3	92	92	404	444	-153	-101	92	318	619	94	-58	92	382	371	-129	-49	92	390	152	-71	-249	92	326	678	-10	-55	92	917	319	6	20
93	439	623	-31	86	93	124	623	20	32	93	443	620	-1	29	93	491	576	7	96	93	398	451	-159	-94	93	317	617	93	-60	93	382	372	-129	-48	93	397	153	-64	-248	93	331	682	-5	-51	93	925	317	14	18
94	438	624	-32	87	94	123	622	19	31	94	444	623	0	32	94	494	576	10	96	94	394	452	-163	-93	94	317	615	93	-62	94	382	379	-129	-41	94	400	156	-61	-245	94	331	682	-5	-51	94	926	313	15	14
95	439	624	-31	87	95	121	622	17	31	95	445	625	1	34	95	494	571	10	91	95	390	451	-167	-94	95	317	613	93	-64	95	378	385	-133	-35	95	405	158	-56	-243	95	332	682	-4	-51	95	928	309	17	10
96	440	624	-30	87	96	121	622	17	31	96	446	625	2	34	96	497	567	13	87	96	383	456	-174	-89	96	317	613	93	-64	96	376	389	-135	-31	96	409	157	-52	-244	96	331	685	-5	-48	96	930	309	19	10
97	440	624	-30	87	97	120	621	16	30	97	448	627	4	36	97	500	562	16	82	97	376	457	-181	-88	97	316	611	92	-66	97	369	397	-142	-23	97	409	151	-52	-250	97	332	687	-4	-46	97	914	307	3	8
98	440	625	-30	88	98	120	620	16	29	98	447	629	3	38	98	501	564	17	84	98	401	482	-156	-63	98	316	611	92	-66	98	356	394	-155	-26	98	408	149	-53	-252	98	332	687	-4	-46	98	914	303	3	4
99	440	625	-30	88	99	119	621	15	30	99	446	629	2	38	99	498	567	14	87	99	397	470	-160	-75	99	316	610	92	-67	99	366	394	-145	-26	99	414	149	-47	-252	99	329	686	-7	-47	99	914	300	3	1
100	438	626	-32	89	100	119	619	15	28	100	444	629	0	38	100	497	566	13	86	100	421	492	-136	-53	100	316	609	92	-68	100	361	387	-150	-33	100	421	149	-40	-252	100	329	685	-7	-48	100	914	298	3	-1
101	437	627	-33	90	101	120	618	16	27	101	446	628	2	37	101	500	568	16	88	101	416	478	-141	-67	101	316	609	92	-68	101	353	391	-158	-29	101	428	148	-33	-253	101	329	682	-7	-51	101	922	298	11	-1
102	439	626	-31	89	102	119	619	15	28	102	445	627	1	36	102	501	569	17	89	102	381	472	-176	-73	102	318	608	94	-69	102	351	394	-160	-26	102	431	148	-30	-253	102	327	679	-9	-54	102	922	298	11	-1
103	441	625	-29	88	103	118	618	14	27	103	447	629	3	38	103	502	570	18	90	103	368	478	-189	-67	103	319	605	95	-72	103	347	399	-164	-21	103	427	154	-34	-247	103	327	677	-9	-56	103	922	294	11	-5
104	437	631	-33	94	104	118	618	14	27	104	446	630	2	39	104	501	572	17	92	104	368	477	-189	-68	104	320	604	96	-73	104	342	402	-169	-18	104	425	154	-36	-247	104	327	677	-9	-56	104	923	293	12	-6
105	448	622	-22	85	105	117	618	13	27	105	446	628	2	37	105	500	574	16	94	105	372	454	-185	-91	105	321	602	97	-75	105	337	404	-174	-16	105	429	140	-32	-261	105	325	664	-11	-69	105	925	291	14	-8
106	445	626	-25	89	106	118	617	14	26	106	448	629	4	38	106	501	573	17	93	106	373	457	-184	-88	106	321	599	97	-78	106	336	404	-175	-16	106	428	132	-33	-269	106	325	660	-11	-73	106	927	279	16	-20
107	445	626	-25	89	107	118	617	14	26	107	449	630	5	39	107	500	571	16	91	107	376	459	-181	-86	107	321	598	97	-79	107	338	400	-173	-20	107	428	129	-33	-272	107	325	655	-11	-78	107	933	273	22	-26
108	443	627	-27	90	108	117	618	13	27	108	446	627	2	36	108	496	570	12	90	108	377	462	-180	-83	108	321	597	97	-80	108	338	396	-173	-24	108	424	129	-37	-272	108	327	644	-9	-89	108	933	273	22	-26
109	444	626	-26	89	109	116	618	12	27	109	450	630	6	39	109	493	570	9	90	109	369	459	-188	-86	109	322	597	98	-80	109	339	394	-172	-26	109	423	130	-38	-271	109	327	638	-9	-95	109	928	271	17	-28
110	440	629	-30	92	110	116	616	12	25	110	450	631	6	40	110	493	569	9	89	110	351	451	-206	-94	110	323	596	99	-81	110	338	394	-173	-26	110	423	132	-38	-269	110	342	601	6	-132	110	927	271	16	-28
111	439	631	-31	94	111	117	613	13	22	111	451	633	7	42	111	495	569	11	89	111	354	450	-203	-95	111	324	596	100	-81	111	329	397	-182	-23	111	424	132	-37	-269	111	342	589	6	-144	111	926	270	15	-29
112	438	632	-32	95	112	116	614	12	23	112	453	635	9	44	112	495	569	11	89	112	353	448	-204	-97	112	324	597	100	-80	112	328	399	-183	-21	112	424	132	-37	-269	112	342	588	6	-145	112	931	272	20	-27
113	433	635	-37	98	113	116	614	12	23	113	454	635	10	44	113	493	568	9	88	113	352	445	-205	-100	113	325	597	101	-80	113	331	396	-180	-24	113	425	133	-36	-268	113	339	593	3	-140	113	931	276	20	-23
114	431	635	-39	98	114	115	615	11	24	114	457	636	13	45	114	518	588	34	108	114	346	443	-211	-102	114	325	598	101	-79	114	332	391	-179	-29	114	426	132	-35	-269	114	339	594	3	-139	114	885	266	-26	-33
115	431	637	-39	100	115	116	615	12	24	115	461	637	17	46	115	492	567	8	87	115	341	439	-216	-106	115	327	598	103	-79	115	332	389	-179	-31	115	427	132	-34	-269	115	339	594	3	-139	115	885	263	-26	-36
116	429	638	-41	101	116	116	616	12	25	116	464	639	20	48	116	492	565	8	85	116	342	437	-215	-108	116	329	599	105	-78	116	331	388	-180	-32	116	428	129	-33	-272	116	339	594	3	-139	116	881	261	-30	-38
117	426	640	-44	103	117	116	618	12	27	117	467	639	23	48	117	494	564	10	84	117	337	438	-220	-107	117	331	599	107	-78	117	335	387	-176	-33	117	431	126	-30	-275	117	339	594	3	-139	117	876	263	-35	-36
118	422	641	-48	104	118	117	616	13	25	118	471	640	27	49	118	496	564	12	84	118	335	437	-222	-108	118	333	598	109	-79	118	341	378	-170	-42	118	426	123	-35	-278	118	339	590	3	-143	118	877	266	-34	-33
119	421	643	-49	106	119	118	616	14	25	119	477	643	33	52	119	496	565	12	85	119	332	437	-225	-108	119	334	598	110	-79	119	338	373	-173	-47	119	424	123	-37	-278	119	339	589	3	-144	119	889	262	-22	-37
120	418	642	-52	105	120	118	616	14	25	120	481	644	37	53	120	501	563	17	83	120	329	437	-228	-108	120	335	598	111	-79	120	337	371	-174	-49	120	421	117	-40	-284	120	340	590	4	-143	120	894	253	-17	-46
121	416	643	-54	106	121	120	614	16	23	121	486	647	42	56	121	501	567	17	87	121	331	438	-226	-107	121	337	599	113	-78	121	337	363	-174	-57	121	420	115	-41	-286	121	342	592	6	-141	121	898	252	-13	-47
122	415	644	-55	107	122	119	616	15	25	122	490	648	46	57	122	503	570	19	90	122	326	439	-231	-106	122	337	598	113	-79	122	331	356	-180	-64	122	420	113	-41	-288	122	344	589	8	-144	122	903	247	-8	-52
123	413	645	-57	108	123	120	617	16	26	123	495	649	51	58	123	503	572	19	92	123	324	440	-233	-105	123	337	598	113	-79	123	330	354	-181	-66	123	420	114	-41	-287	123	347	586	11	-147	123	898	252	-13	-47
124	412	646	-58	109	124	120	618	16	27	124	502	650	58	59	124	505	572	21	92	124	321	441	-236	-104	124	338	598	114	-79	124	328	353	-183	-67	124	420	116	-41	-285	124	351	583	15	-150	124	898	257	-13	-42
125	411	645	-59	108	125	120	618	16	27	125	509	651	65	60	125	512	570	28	90	125	319	443	-238	-102	125	339	597	115	-80	125	328	350	-183	-70	125	419	118	-42	-283	125	352	581	16	-152	125	904	263	-7	-36
126	410	646	-60	109	126	120	619	16	28	126	515	652	71	61	126	516	569	32	89	126	321	450	-236	-95	126	341	596	117	-81	126	325	346	-186	-74	126	420	118	-41	-283	126	355	580	19	-153	126	908	270	-3	-29
127	410	646	-60	109	127	121	618	17	27	127	512	651	68	60	127	514	570	30	90	127	316	456	-241	-89	127	343	597	119	-80	127	323	345	-188	-75	127	419	115	-42	-286	127	357	580	21	-153	127	909	275	-2	-24
128	412	635	-58	98	128	121	619	17	28	128	506	650	62	59	128	512	569	28	89	128	313	461	-244	-84	128	345	598	121	-79	128	323	344	-188	-76	128	421	111	-40	-290	128	357	580	21	-153	128	891	290	-20	-9
129	413	634	-57	97	129	121	620	17	29	129	508	650	64	59	129	516	561	32	81	129	311	464	-246	-81	129	348	600	124	-77	129	319	344	-192	-76	129	423	108	-38	-293	129	357	584	21	-149	129	885	296	-26	-3
130	413	634	-57	97	130	121	621	17	30	130	508	649	64	58	130	504	572	20	92	130	308	466	-249	-79	130	352	602	128	-75	130	318	342	-193	-78	130	424	105	-37	-296	130	356	586	20	-147	130	894	300	-17	1
131	412	636	-58	99	131	121	622	17	31	131	507	649	63	58	131	504	572	20	92	131	307	466	-250	-79	131	356	604	132	-73	131	316	341	-195	-79	131	425	103	-36	-298	131	356	586	20	-147	131	889	304	-22	5
132	411	638	-59	101	132	121	623	17	32	132	504	649	60	58	132	505	573	21	93	132	307	465	-250	-80	132	360	604	136	-73	132	313	341	-198	-79	132	426	97	-35	-304	132	356	588	20	-145	132	884	308	-27	9
133	410	639	-60	102	133	121	623	17	32	133	502	649	58	58	133	502	573	18	93	133	298	465	-259	-80	133	365	604	141	-73	133	313	341	-198	-79	133	428	91	-33	-310	133	356	586	20	-147	133	890	307	-21	8
134	398	642	-72	105	134	120	624	16	33	134	503	647	59	56	134	503	571	19	91	134	298	468	-259	-77	134	369	605	145	-72	134	313	338	-198	-82	134	429	86	-32	-315	134	357	586	21	-147	134	911	308	0	9
135	397	643	-73	106	135	120	624	16	33	135	491	646	47	55	135	504	567	20	87	135	302	468	-255	-77	135	373	604	149	-73	135	312	338	-199	-82	135	425	79	-36	-322	135	357	586	21	-147	135	911	308	0	9
136	392	647	-78	110	136	120	626	16	35	136	491	648	47	57	136	506	569	22	89	136	305	471	-252	-74	136	378	603	154	-74	136	312	333	-199	-87	136	424	73	-37	-328	136	356	586	20	-147	136	908	296	-3	-3
137	388	648	-82	111	137	120	626	16	35	137	490	648	46	57	137	507	568	23	88	137	330	501	-227	-44	137	382	603	158	-74	137	307	328	-204	-92	137	416	71	-45	-330	137	356	586	20	-147	137	903	287	-8	-12
138	385	650	-85	113	138	118	627	14	36	138	489	647	45	56	138	507	569	23	89	138	319	478	-238	-67	138	386	604	162	-73	138	306	327	-205	-93	138	406	71	-55	-330	138	356	586	20	-147	138	902	276	-9	-23
139	378	652	-92	115	139	119	628	15	37	139	488	647	44	56	139	507	569	23	89	139	341	503	-216	-42	139	389	602	165	-75	139	302	327	-209	-93	139	405	74	-56	-327	139	356	585	20	-148	139	900	271	-11	-28
140	381	650	-89	113	140	119	628	15	37	140	487	647	43	56	140	508	569	24	89	140	337	495	-220	-50	140	394	601	170	-76	140	298	328	-213	-92	140	407	74	-54	-327	140	356	585	20	-148	140	894	273	-17	-26
141	380	652	-90	115	141	120	629	16	38	141	483	648	39	57	141	508	571	24	91	141	335	489	-222	-56	141	397	600	173	-77	141	310	335	-201	-85	141	404	75	-57	-326	141	361	585	25	-148	141	899	280	-12	-19
142	379	652	-91	115	142	118	632	14	41	142	481	647	37	56	142	507	573	23	93	142	335	478	-222	-67	142	399	599	175	-78	142	314	330	-197	-90	142	404	71	-57	-330	142	363	585	27	-148	142	902	287	-9	-12
143	378	652	-92	115	143	119	632	15	41	143	477	647	33	56	143	506	572	22	92	143	335	475	-222	-70	143	401	597	177	-80	143	318	330	-193	-90	143	404	65	-57	-336	143	363	585	27	-148	143	902	291	-9	-8
144	376	654	-94	117	144	117	633	13	42	144	471	645	27	54	144	507	571	23	91	144	334	472	-223	-73	144	402	595	178	-82	144	318	329	-193	-91	144	404	61	-57	-340	144	365	585	29	-148	144	912	282	1	-17
145	375	654	-95	117	145	117	634	13	43	145	467	644	23	53	145	509	575	25	95	145	315	460	-242	-85	145	403	594	179	-83	145	317	329	-194	-91	145	401	62	-60	-339	145	368	586	32	-147	145	916	284	5	-15
146	373	655	-97	118	146	118	636	14	45	146	465	643	21	52	146	508	573	24	93	146	317	460	-240	-85	146	404	593	180	-84	146	314	329	-197	-91	146	397	64	-64	-337	146	368	586	32	-147	146	927	285	16	-14
147	373	653	-97	116	147	117	637	13	46	147	464	642	20	51	147	513	576	29	96	147	316	458	-241	-87	147	405	592	181	-85	147	317	340	-194	-80	147	396	65	-65	-336	147	370	585	34	-148	147	928	284	17	-15
148	372	654	-98	117	148	116	638	12	47	148	461	641	17	50	148	507	573	23	93	148	318	457	-239	-88	148	406	591	182	-86	148	317	340	-194	-80	148	396	69	-65	-332	148	372	584	36	-149	148	939	284	28	-15
149	371	653	-99	116	149	114	640	10	49	149	458	640	14	49	149	508	573	24	93	149	319	455	-238	-90	149	407	589	183	-88	149	318	338	-193	-82	149	395	71	-66	-330	149	372	581	36	-152	149	939	281	28	-18
150	371	651	-99	114	150	112	642	8	51	150	456	638	12	47	150	511	578	27	98	150	311	451	-246	-94	150	409	588	185	-89	150	318	335	-193	-85	150	395	71	-66	-330	150	370	579	34	-154	150	942	285	31	-14
151	370	652	-100	115	151	110	644	6	53	151	456	637	12	46	151	513	577	29	97	151	312	451	-245	-94	151	411	588	187	-89	151	319	332	-192	-88	151	398	74	-63	-327	151	361	576	25	-157	151	944	295	33	-4
152	370	651	-100	114	152	110	644	6	53	152	457	637	13	46	152	512	577	28	97	152	311	452	-246	-93	152	412	587	188	-90	152	319	333	-192	-87	152	400	78	-61	-323	152	347	571	11	-162	152	944	300	33	1
153	337	630	-133	93	153	109	645	5	54	153	458	636	14	45	153	510	577	26	97	153	312	453	-245	-92	153	413	587	189	-90	153	319	336	-192	-84	153	402	83	-59	-318	153	338	562	2	-171	153	941	291	30	-8
154	359	642	-111	105	154	109	646	5	55	154	459	633	15	42	154	507	579	23	99	154	310	448	-247	-97	154	414	586	190	-91	154	320	339	-191	-81	154	402	86	-59	-315	154	334	546	-2	-187	154	935	290	24	-9
155	360	642	-110	105	155	108	648	4	57	155	456	633	12	42	155	502	583	18	103	155	310	442	-247	-103	155	415	584	191	-93	155	323	340	-188	-80	155	400	90	-61	-311	155	346	545	10	-188	155	928	290	17	-9
156	358	642	-112	105	156	110	649	6	58	156	455	631	11	40	156	503	585	19	105	156	312	441	-245	-104	156	414	582	190	-95	156	324	340	-187	-80	156	396	93	-65	-308	156	346	545	10	-188	156	927	291	16	-8
157	358	639	-112	102	157	109	650	5	59	157	455	631	11	40	157	503	585	19	105	157	312	442	-245	-103	157	414	580	190	-97	157	323	339	-188	-81	157	391	93	-70	-308	157	351	543	15	-190	157	927	294	16	-5
158	357	637	-113	100	158	108	652	4	61	158	456	632	12	41	158	501	589	17	109	158	308	445	-249	-100	158	414	578	190	-99	158	323	339	-188	-81	158	389	93	-72	-308	158	355	543	19	-190	158	927	287	16	-12
159	355	637	-115	100	159	108	653	4	62	159	456	632	12	41	159	497	591	13	111	159	303	453	-254	-92	159	415	574	191	-103	159	319	342	-192	-78	159	387	94	-74	-307	159	364	542	28	-191	159	936	287	25	-12
160	352	637	-118	100	160	107	655	3	64	160	457	631	13	40	160	494	594	10	114	160	304	456	-253	-89	160	415	572	191	-105	160	316	350	-195	-70	160	389	97	-72	-304	160	368	542	32	-191	160	939	282	28	-17
161	351	636	-119	99	161	107	657	3	66	161	456	633	12	42	161	491	599	7	119	161	309	462	-248	-83	161	415	570	191	-107	161	316	352	-195	-68	161	393	98	-68	-303	161	373	542	37	-191	161	941	282	30	-17
162	351	637	-119	100	162	106	659	2	68	162	456	632	12	41	162	491	603	7	123	162	307	468	-250	-77	162	414	566	190	-111	162	316	356	-195	-64	162	396	98	-65	-303	162	386	543	50	-190	162	936	282	25	-17
163	351	637	-119	100	163	106	660	2	69	163	457	632	13	41	163	494	604	10	124	163	305	472	-252	-73	163	414	563	190	-114	163	314	359	-197	-61	163	398	99	-63	-302	163	389	545	53	-188	163	958	291	47	-8
164	351	638	-119	101	164	106	661	2	70	164	457	632	13	41	164	498	605	14	125	164	308	477	-249	-68	164	414	561	190	-116	164	318	365	-193	-55	164	395	99	-66	-302	164	389	547	53	-186	164	960	293	49	-6
165	351	643	-119	106	165	107	661	3	70	165	458	632	14	41	165	497	608	13	128	165	310	480	-247	-65	165	414	558	190	-119	165	332	381	-179	-39	165	396	99	-65	-302	165	389	550	53	-183	165	960	295	49	-4
166	348	643	-122	106	166	105	663	1	72	166	457	635	13	44	166	499	612	15	132	166	317	484	-240	-61	166	412	556	188	-121	166	326	372	-185	-48	166	393	101	-68	-300	166	386	554	50	-179	166	960	296	49	-3
167	346	643	-124	106	167	105	665	1	74	167	456	633	12	42	167	499	610	15	130	167	324	483	-233	-62	167	410	554	186	-123	167	325	371	-186	-49	167	390	103	-71	-298	167	386	555	50	-178	167	964	295	53	-4
168	346	643	-124	106	168	105	664	1	73	168	450	635	6	44	168	498	608	14	128	168	326	484	-231	-61	168	410	553	186	-124	168	322	371	-189	-49	168	388	103	-73	-298	168	386	555	50	-178	168	964	293	53	-6
169	345	644	-125	107	169	105	665	1	74	169	449	635	5	44	169	498	601	14	121	169	333	482	-224	-63	169	410	551	186	-126	169	318	370	-193	-50	169	389	101	-72	-300	169	389	555	53	-178	169	961	293	50	-6
170	342	646	-128	109	170	103	665	-1	74	170	449	635	5	44	170	500	599	16	119	170	336	484	-221	-61	170	409	549	185	-128	170	318	370	-193	-50	170	390	99	-71	-302	170	391	551	55	-182	170	961	296	50	-3
171	341	647	-129	110	171	102	665	-2	74	171	449	635	5	44	171	500	602	16	122	171	337	489	-220	-56	171	407	547	183	-130	171	318	372	-193	-48	171	389	100	-72	-301	171	394	551	58	-182	171	963	296	52	-3
172	340	647	-130	110	172	102	666	-2	75	172	451	634	7	43	172	498	604	14	124	172	338	494	-219	-51	172	404	546	180	-131	172	317	371	-194	-49	172	388	99	-73	-302	172	395	551	59	-182	172	964	296	53	-3
173	339	646	-131	109	173	102	667	-2	76	173	452	634	8	43	173	497	605	13	125	173	340	498	-217	-47	173	402	545	178	-132	173	313	369	-198	-51	173	387	99	-74	-302	173	403	551	67	-182	173	965	296	54	-3
174	339	646	-131	109	174	104	668	0	77	174	451	631	7	40	174	492	594	8	114	174	341	476	-216	-69	174	401	543	177	-134	174	313	366	-198	-54	174	387	99	-74	-302	174	401	551	65	-182	174	956	294	45	-5
175	340	648	-130	111	175	131	667	27	76	175	452	629	8	38	175	495	600	11	120	175	339	475	-218	-70	175	399	543	175	-134	175	318	360	-193	-60	175	387	99	-74	-302	175	401	551	65	-182	175	955	287	44	-12
176	340	648	-130	111	176	128	667	24	76	176	453	629	9	38	176	497	605	13	125	176	341	474	-216	-71	176	398	542	174	-135	176	318	359	-193	-61	176	385	100	-76	-301	176	406	551	70	-182	176	955	279	44	-20
177	339	648	-131	111	177	129	667	25	76	177	452	627	8	36	177	499	607	15	127	177	338	473	-219	-72	177	397	540	173	-137	177	313	359	-198	-61	177	382	101	-79	-300	177	407	551	71	-182	177	951	279	40	-20
178	339	645	-131	108	178	129	667	25	76	178	454	626	10	35	178	498	607	14	127	178	338	474	-219	-71	178	394	539	170	-138	178	313	360	-198	-60	178	377	104	-84	-297	178	407	551	71	-182	178	955	290	44	-9
179	337	643	-133	106	179	129	668	25	77	179	455	626	11	35	179	499	607	15	127	179	339	474	-218	-71	179	392	538	168	-139	179	313	362	-198	-58	179	376	107	-85	-294	179	408	551	72	-182	179	955	289	44	-10
180	336	640	-134	103	180	130	668	26	77	180	456	625	12	34	180	499	608	15	128	180	339	474	-218	-71	180	391	539	167	-138	180	314	363	-197	-57	180	372	113	-89	-288	180	408	551	72	-182	180	953	286	42	-13
181	335	639	-135	102	181	130	671	26	80	181	456	624	12	33	181	501	611	17	131	181	342	475	-215	-70	181	390	538	166	-139	181	317	364	-194	-56	181	368	116	-93	-285	181	410	551	74	-182	181	947	294	36	-5
182	333	639	-137	102	182	131	673	27	82	182	456	623	12	32	182	498	611	14	131	182	339	476	-218	-69	182	388	538	164	-139	182	316	364	-195	-56	182	365	117	-96	-284	182	412	554	76	-179	182	947	298	36	-1
183	332	639	-138	102	183	131	672	27	81	183	457	625	13	34	183	497	610	13	130	183	331	475	-226	-70	183	387	538	163	-139	183	312	367	-199	-53	183	360	120	-101	-281	183	412	555	76	-178	183	946	305	35	6
184	331	639	-139	102	184	132	675	28	84	184	457	625	13	34	184	487	611	3	131	184	329	474	-228	-71	184	387	537	163	-140	184	311	369	-200	-51	184	351	122	-110	-279	184	419	558	83	-175	184	942	309	31	10
185	329	641	-141	104	185	133	674	29	83	185	458	627	14	36	185	487	611	3	131	185	326	477	-231	-68	185	386	537	162	-140	185	305	372	-206	-48	185	340	120	-121	-281	185	418	555	82	-178	185	960	319	49	20
186	328	640	-142	103	186	132	675	28	84	186	460	625	16	34	186	488	611	4	131	186	323	476	-234	-69	186	385	536	161	-141	186	305	373	-206	-47	186	336	116	-125	-285	186	420	552	84	-181	186	967	317	56	18
187	327	640	-143	103	187	131	676	27	85	187	460	624	16	33	187	490	610	6	130	187	323	475	-234	-70	187	383	535	159	-142	187	304	373	-207	-47	187	338	110	-123	-291	187	421	552	85	-181	187	973	314	62	15
188	326	641	-144	104	188	133	681	29	90	188	460	623	16	32	188	491	609	7	129	188	322	470	-235	-75	188	381	534	157	-143	188	301	377	-210	-43	188	339	116	-122	-285	188	423	552	87	-181	188	973	310	62	11
189	324	640	-146	103	189	135	682	31	91	189	461	622	17	31	189	495	605	11	125	189	322	467	-235	-78	189	380	533	156	-144	189	296	377	-215	-43	189	340	119	-121	-282	189	424	554	88	-179	189	955	315	44	16
190	324	636	-146	99	190	134	680	30	89	190	462	622	18	31	190	500	604	16	124	190	322	467	-235	-78	190	378	532	154	-145	190	293	378	-218	-42	190	341	122	-120	-279	190	424	555	88	-178	190	953	317	42	18
191	323	637	-147	100	191	133	681	29	90	191	464	620	20	29	191	503	605	19	125	191	324	465	-233	-80	191	377	531	153	-146	191	304	378	-207	-42	191	343	119	-118	-282	191	423	560	87	-173	191	946	318	35	19
192	323	635	-147	98	192	135	685	31	94	192	464	620	20	29	192	503	607	19	127	192	323	463	-234	-82	192	372	532	148	-145	192	310	378	-201	-42	192	344	118	-117	-283	192	420	563	84	-170	192	942	309	31	10
193	322	635	-148	98	193	134	683	30	92	193	465	619	21	28	193	504	607	20	127	193	323	462	-234	-83	193	368	531	144	-146	193	310	379	-201	-41	193	341	120	-120	-281	193	420	566	84	-167	193	940	313	29	14
194	322	633	-148	96	194	133	683	29	92	194	464	620	20	29	194	504	607	20	127	194	325	459	-232	-86	194	364	532	140	-145	194	312	382	-199	-38	194	343	121	-118	-280	194	419	569	83	-164	194	941	318	30	19
195	321	634	-149	97	195	136	687	32	96	195	464	621	20	30	195	504	608	20	128	195	324	459	-233	-86	195	360	530	136	-147	195	312	383	-199	-37	195	344	122	-117	-279	195	418	573	82	-160	195	939	321	28	22
196	321	635	-149	98	196	135	688	31	97	196	464	622	20	31	196	505	610	21	130	196	323	459	-234	-86	196	356	530	132	-147	196	314	384	-197	-36	196	346	119	-115	-282	196	418	573	82	-160	196	935	314	24	15
197	320	636	-150	99	197	134	687	30	96	197	464	622	20	31	197	506	610	22	130	197	319	461	-238	-84	197	352	530	128	-147	197	317	385	-194	-35	197	346	117	-115	-284	197	416	573	80	-160	197	933	307	22	8
198	319	636	-151	99	198	136	688	32	97	198	463	621	19	30	198	517	598	33	118	198	318	462	-239	-83	198	348	530	124	-147	198	325	389	-186	-31	198	345	113	-116	-288	198	416	573	80	-160	198	931	299	20	0
199	318	637	-152	100	199	137	687	33	96	199	464	620	20	29	199	517	599	33	119	199	316	464	-241	-81	199	345	530	121	-147	199	332	390	-179	-30	199	347	107	-114	-294	199	416	572	80	-161	199	926	293	15	-6
200	318	636	-152	99	200	137	687	33	96	200	462	619	18	28	200	517	600	33	120	200	315	466	-242	-79	200	343	528	119	-149	200	332	391	-179	-29	200	346	103	-115	-298	200	416	569	80	-164	200	927	289	16	-10
[truncated: 115 more columns]

## Sheet: 2C - MSD Average (Plotted)
Source data for Fig. 2C: Plotted Average Mean Squared Displacement (MSD) and SEM. MSD calculated using DiPer software (Gorelik et al 2013) from trajectories shown in Fig. 2B
Control(cKO)				cKO
Time(min)	Avg MSD	MSD SEM		Time(min)	Avg MSD	MSD SEM
5	19.8369	2.72954		5	35.5369	6.03055
10	51.0922	7.64397		10	98.0545	17.5794
15	89.7426	13.9035		15	183.32	33.8038
20	132.53	21.1556		20	285.054	53.4994
25	179.819	29.25		25	399.944	75.4497
30	231.516	38.4245		30	526.179	99.0413
35	287.428	48.5289		35	661.449	124.285
40	347.412	59.638		40	806.314	151.218
45	410.931	71.4187		45	960.471	180.142
50	477.568	83.6781		50	1122.61	210.916
55	547.639	96.3238		55	1291.86	243.85
60	620.837	109.432		60	1466.79	278.532
65	697.274	123.054		65	1648.35	315.218
70	775.588	137.094		70	1836.16	354.034
75	855.27	151.383		75	2030.63	394.859
80	936.476	165.916		80	2231.86	437.836
85	1019.18	180.728		85	2440.33	482.512
90	1104.79	196.027		90	2655.11	528.557
95	1192.6	211.495		95	2875.11	576.127
100	1282.69	227.216		100	3101.03	625.391
105	1374.26	243.133		105	3332.34	676.291
110	1466.68	259.377		110	3570.47	729.082
115	1559.73	275.819		115	3816.67	784.24
120	1653.98	292.825		120	4069.16	841.225
125	1749.65	310.183		125	4327.62	900.025
130	1847.5	327.817		130	4590.4	960.23
135	1946.81	345.711		135	4857.13	1021.47
140	2047.18	363.668		140	5128.67	1083.98
145	2148.24	381.839		145	5404.23	1147.44
150	2251.28	400.13		150	5683.29	1211.64
155	2355.84	418.385		155	5965.02	1276.4
160	2462.01	436.642		160	6247.1	1341.35
165	2567.71	454.599		165	6529.8	1406.69
170	2673.46	472.458		170	6814.44	1472.4
175	2779.84	490.25		175	7100.16	1538.63
180	2885.79	507.947		180	7384.52	1604.92
185	2992.06	525.712		185	7668.75	1671.45
190	3097.78	543.143		190	7953.49	1737.98
195	3204.34	560.335		195	8239.11	1804.7
200	3310.88	577.41		200	8524.71	1871
205	3417.7	594.426		205	8809.8	1937.42
210	3524.69	611.376		210	9097.25	2004.42
215	3631.24	628.355		215	9386.91	2071.8
220	3737.49	645.162		220	9678.76	2139.62
225	3843.41	661.744		225	9971.73	2207.53
230	3948.1	678.035		230	10264.9	2275.98
235	4053.33	694.185		235	10559.8	2345.18
240	4159.3	709.982		240	10854.4	2415.04
245	4264.18	725.66		245	11149.3	2485.4
250	4367.31	741.05		250	11441.2	2556.11
255	4468.06	756.439		255	11733.2	2627.44
260	4566.69	771.529		260	12023.4	2699.09
265	4665.7	786.669		265	12311	2770.56
270	4763.49	801.515		270	12595.8	2841.7
275	4860.92	816.386		275	12876.7	2912.59
280	4957.87	831.431		280	13155.3	2983
285	5054.15	846.314		285	13431.1	3052.44
290	5151.74	862.14		290	13702	3120.66
295	5251.17	878.141		295	13970	3188.62
300	5351.53	894.405		300	14236.2	3256.47
305	5452.44	911.066		305	14499.1	3324.06
310	5554.22	928.13		310	14760.6	3391.42
315	5657.42	945.857		315	15023.1	3458.61
320	5761.16	963.856		320	15283.8	3525.56
325	5866.61	981.969		325	15546.9	3592.69
330	5974.95	1000.25		330	15806.9	3659.21
335	6085.58	1018.92		335	16067.7	3726.26
340	6197.67	1037.76		340	16327.3	3793.63
345	6308.76	1056.51		345	16584.9	3861.22
350	6419.13	1075.24		350	16839.8	3928.91
355	6529.84	1093.95		355	17092.7	3996.72
360	6641.47	1112.62		360	17343.5	4065.54
365	6752.99	1131.04		365	17593.8	4134.09
370	6862.45	1148.54		370	17843.6	4202.39
375	6970.18	1165.02		375	18090.3	4268.82
380	7078.03	1181.34		380	18337.9	4334.81
385	7185.4	1197.43		385	18586.9	4400.56
390	7294.32	1213.57		390	18835.2	4465.63
395	7405.1	1229.79		395	19086	4530.34
400	7516.67	1246.16		400	19334.8	4593.95
405	7627.18	1262.65		405	19581.4	4655.32
410	7738.13	1279.37		410	19824	4714.59
415	7849.74	1296.16		415	20062.8	4771.48
420	7962.05	1313.16		420	20294.9	4825.64
425	8075.61	1330.17		425	20523.9	4877.23
430	8190.17	1346.73		430	20754	4927.01
435	8305.59	1363.17		435	20986.6	4975.51
440	8420.49	1379.25		440	21221.5	5023.02
445	8538.11	1395.34		445	21457	5068.97
450	8656.95	1411.48		450	21692	5113.68
455	8776.43	1427.65		455	21933.1	5158.86
460	8896.97	1443.97		460	22164.3	5202.57
465	9017.03	1460.34		465	22391.9	5244.74
470	9135.49	1475.52		470	22619.3	5285.29
475	9252.74	1490.66		475	22847.5	5324.64
480	9369.25	1505.99		480	23071.7	5362.68
485	9486.71	1521.51		485	23290.5	5399.54
490	9602.6	1536.59		490	23509.7	5435.53

## Sheet: 2C - MSD Individual Cells
Control(cKO) MSD																																									cKO MSD
cell# 1	cell# 2	cell# 3	cell# 4	cell# 5	cell# 6	cell# 7	cell# 8	cell# 9	cell# 10	cell# 11	cell# 12	cell# 13	cell# 14	cell# 15	cell# 16	cell# 17	cell# 18	cell# 19	cell# 20	cell# 21	cell# 22	cell# 23	cell# 24	cell# 25	cell# 26	cell# 27	cell# 28	cell# 29	cell# 30	cell# 31	cell# 32	cell# 33	cell# 34	cell# 35	cell# 36	MSD avg	MSD sem				cell# 1	cell# 2	cell# 3	cell# 4	cell# 5	cell# 6	cell# 7	cell# 8	cell# 9
22.6111	3.06533	9.27136	16.5226	12.7789	7.90955	4.38191	8.54271	5.54774	7.14573	4.43216	12.7889	8.86935	66.3116	13.6181	10.99	29.4824	20.5829	32.206	41.8643	66.4573	28.1105	9.1206	26.3769	5.23116	42.7186	9.8794	20.0854	38.4372	9.73869	22.1306	11.2111	14.5829	26.3769	2.50251	42.2462	19.8369	2.72954				18.1465	7.21106	6.87437	67.9146	78.5678	10.3618	39.9297	24.4472	63.6281
65.3604	9.38889	25.2677	42.3434	29.2071	18.4495	9.86869	16.6414	10.1919	19.4444	10.0758	32.2626	24.2323	193.48	39.3636	29.1111	82.8737	49.8283	72.6263	129.793	183.409	68.4192	23.8131	58.5859	15.601	130.672	32.4545	54.3232	94.2778	21.6212	41.5303	31.1818	35.4242	71.197	6.48485	60.5151	51.0922	7.64397				28.9848	14.8131	17.5657	121.778	154.778	33.1869	92.8838	78.9242	177.121
115.281	18.6498	43.4315	76.8629	45.6701	30.5025	16.8883	24.198	17.1371	33.4518	15.7411	55.4264	43.0812	351.431	70.7107	52.0355	145.792	77.1421	109.838	253.65	305.635	116.127	42.5228	96.1929	30.2893	259.005	65.8426	97.8528	167.807	34.4569	56.264	55.9543	63.6244	131.584	11.8782	98.7767	89.7426	13.9035				44.1225	23.8985	31.802	162.604	260.533	65.5533	152.655	153.294	313.706
171.923	30.8725	64.4235	117.684	61.4898	43.9439	24.6327	33.9541	26.4031	47.9337	21.7602	79.1225	65.0816	540.791	102.531	76.8929	210.541	107.316	153.133	406.995	409.061	163.694	64.1735	137.74	49.2347	419.413	108.469	152.776	258.097	47.4592	69.6378	83.8929	95.5102	201.776	18.3775	104.332	132.53	21.1556				64.1436	34.9643	49.4949	189.755	363.117	106.577	217.454	241.684	460.694
237.428	45.8154	86.5846	164.39	74.5897	59.2769	32.9487	45.9692	37.8667	62.5487	28.2359	102.61	90.0461	766.333	134.313	105.344	273.759	140.451	202.287	579.877	476.344	206.979	87.9539	183.846	71.0359	607.451	160.728	215.99	358.026	63.0513	88.9846	115.636	131.205	277.908	25.7641	131.903	179.819	29.25				87.866	47.4051	70.3538	227.538	461.426	157.749	283	345.19	616.733
312.036	63.4691	110.216	216.227	87.7165	77.7423	42.3247	59.2474	52.3969	77.7062	35.6649	125.67	120.495	1021.08	166.046	136.938	336.629	175.845	251.845	778.387	513.258	249.294	113.928	237.268	96.0928	820.954	221.387	284.624	481.665	81.8608	114.242	150.577	171.649	361.887	34.6082	153.598	231.516	38.4245				114.803	60.8144	94.2938	276.479	564.974	217.351	359.165	462.995	774.495
394.797	83.228	136.782	271.596	101.047	97.4922	52.6425	74.2435	69.0363	93.4974	42.8549	148.575	154.529	1295.72	201.554	172.321	401.249	213.907	298.021	996.529	544.653	294.819	140.731	294.109	124.591	1051.63	290.161	361.192	615.523	102.098	140.031	187.845	214.471	453.347	44.2591	188.332	287.428	48.5289				143.885	75.9223	121.446	308.425	670.653	285.674	439.026	593.14	933.036
483.555	104.974	165.198	330.24	107.312	117.859	63.2917	92.8177	86.6146	110.469	49.901	173.365	191.109	1588.37	240.198	207.651	467.99	258.01	350.151	1235.47	583.714	346.089	168.5	348.24	156.292	1299.9	365.094	445.589	765.823	125.349	164.875	227.547	258.099	552.052	55.0833	220.047	347.412	59.638				176.602	93.0729	151.391	329.302	789.661	363.073	534.536	736.016	1100.73
578.358	128.654	194.513	393.649	116.539	139.073	75.8115	112.382	106.267	129.152	57.2042	199.979	230.717	1891.64	282.461	243.927	535.513	306.052	401.592	1486.63	625.99	402.084	196.728	401.136	191.22	1566.81	446.754	538.398	930.88	148.173	188.456	271.492	303.168	651.445	66.9738	253.696	410.931	71.4187				210.905	111.686	183.492	351.471	914.733	449.325	643.183	892.199	1278.17
679.339	154.032	220.537	459.674	128.468	161.589	88.8158	131.5	127.179	148.963	64.2158	231.142	273.811	2200.27	326.337	281.974	610.995	354.247	449.489	1743.62	667.695	465.695	227.437	453.132	229.732	1847.92	534.789	638.179	1112.11	172.584	210.589	319.326	350.158	758.279	79.4842	289.137	477.568	83.6781				246.487	130.605	217.095	378.663	1043.36	543.068	756.574	1059.52	1460.83
785.059	181.63	245.265	528.307	143.005	187.418	102.37	153	150.175	169.751	71.582	266.947	320.952	2509.87	370.545	319.439	688.725	404.503	499.143	2008.19	709.82	531.714	258.788	507.603	272.238	2141.65	629.894	748.714	1315.44	198.376	235.116	371.138	400.841	866.196	92.7037	328.889	547.639	96.3238				285.298	151.704	252.063	403.921	1169.88	645.333	873.212	1236.52	1637.84
892.781	210.979	269.17	598.835	158.261	214.394	117.011	175.638	173.404	190.33	79.0851	306.516	372.654	2821.77	414.862	354.761	769.101	458.202	555.601	2280.65	755.463	605.915	291.207	559.447	317.766	2449.26	733.34	868.638	1538.64	227.069	261.069	425.516	453.223	975.346	106.298	367.941	620.837	109.432				325.198	173.798	287.819	433.521	1296.97	756.197	991.324	1421.83	1806.07
1003.48	241.957	293.283	672.005	173.107	241.588	132.594	199.439	197.631	209.225	87.6364	348.401	428.652	3135.42	456.075	391.856	857.299	515.412	620.471	2564.52	803.123	682.674	325.578	609.679	365.984	2771.12	844.545	991.979	1783.22	257.578	287.775	482.535	507.134	1086.42	120.23	412.23	697.274	123.054				364.113	196.545	324.455	471.337	1431.9	875.759	1112.7	1614.86	1962.66
1115.98	274.468	320.151	747.425	182.172	268.946	149.543	223.591	223.274	227.414	97.0269	392.919	489.027	3446.38	493.355	428.608	944.145	576.796	695.876	2856.76	848.355	752.022	359.946	652.903	416.941	3110.07	963.995	1120.45	2043.42	289.769	319.14	542.247	561.957	1195.17	134.344	456.57	775.588	137.094				404.141	220.414	361.575	510.699	1572.77	1002.2	1236	1812.98	2127.8
1227.26	308.357	344.184	823.541	191.6	297.524	167.616	248.151	248.886	244.838	106.989	441.07	553.519	3751.43	528.865	463.735	1036.7	641.919	778.216	3153.51	879.676	820.373	394.865	691.962	470.654	3459.14	1089.42	1255.2	2318.73	322.362	350.492	604.427	618.232	1303.01	148.67	504.6	855.27	151.383				447.848	245.843	398.827	541.335	1721.91	1135.7	1363.34	2015.8	2297.1
1340.49	344.337	367.755	903.12	199.179	327.87	186.576	273.054	275.484	262.315	117.413	492.266	621.712	4050.92	566.511	500.152	1131.82	710.728	862.337	3452.36	900.63	887.761	426.288	726.821	527.261	3818.01	1220.78	1393.15	2609.69	356.065	383.875	669.505	675.049	1413.77	163.533	554.543	936.476	165.916				491.044	272.304	436.527	563.587	1873.84	1275.74	1490.92	2224.55	2470.07
1457.25	381.519	391.481	982.59	207.88	358.574	206.137	299.153	300.683	279.59	127.792	545.568	693.339	4348.1	603.683	538.934	1230.6	780.508	946.809	3746.11	919.612	956.956	455.836	755.863	586.792	4188.62	1359.36	1532.14	2917.87	390.366	414.415	737.683	734.869	1526.49	178.607	608.546	1019.18	180.728				534.703	299.738	474.011	604.197	2028.04	1422.32	1622.02	2439.92	2652.61
1580.56	419.802	415.253	1064.95	216.099	390.209	225.962	325.335	325.863	297.275	138.841	601.005	765.615	4651.22	640.121	579.313	1332.67	850.736	1031	4038.71	955.242	1030.28	484.599	779.346	649.808	4570.67	1504.47	1674.97	3249.71	426.187	448.39	809.934	797.582	1640.7	194.253	665.764	1104.79	196.027				580.453	328.115	510.681	651.962	2179.35	1576.16	1757.67	2657.86	2853.36
1706.18	458.867	440.923	1148.7	225.398	422.525	245.834	351.95	351.707	315.177	150.221	659.287	840.867	4954.33	672.293	622.022	1436.73	925.331	1112.75	4321.8	1012.12	1106.86	509.718	800.53	715.541	4960.07	1655.64	1817.58	3599.81	464.017	486.972	887.044	862.613	1755.53	210.039	726.586	1192.6	211.495				625.589	357.238	546.928	692.834	2333.22	1736.78	1900.37	2880.77	3048.47
1835.82	499.25	465.689	1230.39	239.067	456.356	266.233	380	378.233	333.3	161.956	719.044	920.089	5254.19	704.389	666.839	1545.03	1002.11	1189.72	4602.38	1089.54	1188.73	536.017	817.15	784.1	5358.79	1810.67	1962.21	3967.92	501.094	525.267	968.533	931.006	1873.06	226.017	786.511	1282.69	227.216				674.782	387.444	581.639	719.65	2483.73	1903.21	2052.22	3105.09	3224.98
1968.87	541.33	490.575	1311.45	254.57	492.508	286.52	409.14	406.095	352.413	173.374	781.609	1001.68	5550.22	732.95	713.475	1664.66	1074.27	1272.89	4877.46	1159.54	1278.97	564.447	829.838	854.81	5762.18	1968.51	2109.03	4354.91	539.246	562.531	1054.07	998.844	1991.32	242.385	846.765	1374.26	243.133				724.163	418.564	615.268	751.793	2640.72	2076.56	2204.99	3333.12	3392.75
2106.44	584.039	516.916	1390.65	267.073	529.91	307.09	440.112	434.899	373.096	185.169	847.669	1086.02	5852.52	759.253	760.86	1789.25	1147.66	1353.37	5146.63	1210.34	1371.79	593.725	841.18	927.646	6172.13	2126.02	2260.78	4755.85	579.629	598.051	1140.47	1069.13	2107.98	258.983	908.264	1466.68	259.377				775.52	450.831	647.489	801.438	2799.72	2256.4	2359.89	3564.07	3552.04
2247.43	627.893	543.226	1469.43	282.401	567.192	328.729	471.497	463.605	393.927	198.316	917.994	1171.83	6147.61	783.661	808.582	1919.67	1228.05	1424.45	5414.52	1244.96	1463.25	622.763	850.972	1002.24	6588.94	2286.28	2415.93	5170.04	622.311	631.746	1228.06	1140.26	2224.53	276.565	971.554	1559.73	275.819				827.102	482.616	678.582	842.333	2956.42	2441.01	2516.14	3800.99	3703.72
2390.14	672.807	568.744	1547.4	291.659	605.028	351.182	502.875	492.426	413.312	210.938	991.045	1259.13	6450.42	811.085	857.841	2044.41	1308.52	1496.08	5687.6	1274.72	1552.91	652.341	866.364	1077.44	7014.45	2442.01	2574.68	5602.19	665.739	661.21	1317.73	1212.85	2347.64	294.778	1033.57	1653.98	292.825				882.257	515.312	708.403	880.79	3115.28	2629.76	2671.89	4043.57	3848.69
2536.43	719.074	594.126	1623.86	303.451	644.217	374.149	536.509	521.891	432.634	223.943	1067.62	1349.77	6758.98	838.709	908.269	2162.67	1387.42	1575.23	5959.01	1307.66	1638.56	683.051	882.64	1154.9	7449.45	2594	2734.39	6045.56	706.126	685.36	1410.17	1286.67	2477.81	313.349	1099.84	1749.65	310.183				938.747	547.863	737.446	916.566	3274.99	2822.7	2833.98	4288.46	3990.18
2685.21	766.92	620.782	1701.3	316.483	685.471	396.517	569.724	552.77	451.678	236.776	1146.34	1442.99	7071.42	868.098	959.793	2277.63	1466.99	1660.03	6228.51	1355.15	1727.01	714.517	899.989	1234.42	7890.32	2749.63	2895.77	6502.28	746.713	706.805	1505.51	1360.7	2609.9	332.345	1173.39	1847.5	327.817				1000.27	580.598	764.046	959.828	3440.48	3018.56	2992.98	4537.64	4114.44
2836.6	815.676	647.971	1781.6	329.399	727.318	420.329	604.04	583.353	470.434	250.006	1226.24	1538.69	7386.3	897.353	1012.39	2396.16	1548.21	1745.24	6499.44	1419.19	1820.76	746.127	916.058	1316.02	8332.16	2915.13	3040.01	6975.57	786.318	721.543	1602.46	1440.9	2738.17	351.173	1246.95	1946.81	345.711				1065	606.89	789.341	1005.9	3610.73	3217.98	3157.63	4793.77	4218.03
2989.81	865.814	676.762	1861.88	343.355	770.692	445.302	640.11	613.494	488.663	263.826	1311.06	1635.9	7706.57	923.151	1067.64	2527.46	1623.46	1837.49	6757.1	1491.76	1921.14	774.07	934.808	1399.48	8771.27	3084.25	3182.95	7460.26	828.081	732.267	1702.75	1522.4	2859.21	369.994	1314.4	2047.18	363.668				1133.04	632.227	814.645	1055.5	3779.69	3418.91	3319.38	5062.68	4316.23
3145.32	916.556	708.719	1942.74	358.345	813.696	470.632	677.374	643.199	507.099	277.041	1399.2	1734.02	8049.74	945.982	1125.95	2670.27	1693.34	1925.57	7011.05	1566.37	2027.63	802.637	956.754	1484.71	9195.97	3249.78	3324.57	7953.98	863.766	736.433	1807.37	1605.8	2979.42	388.146	1377.58	2148.24	381.839				1204.56	656.316	839.193	1107.89	3959.02	3620.53	3481.82	5341.77	4402.88
3306.97	968.224	742.012	2026.14	373.988	856.818	496.747	714.553	671.029	525.306	290.541	1492.78	1833.65	8404.24	969.718	1185.78	2825.21	1764.22	2003.74	7266.38	1635.36	2142.54	831.594	995.476	1571.42	9607.46	3418.11	3461.56	8461.3	900.188	743.906	1916.67	1690.15	3099.98	406.318	1446.05	2251.28	400.13				1276.28	681.106	861.788	1157.71	4143.21	3822.09	3653.75	5630.31	4478.42
3473.62	1022.2	774.385	2114.8	391.562	902.521	524.379	751.598	699.29	542.817	304.74	1588.06	1935.66	8761.5	993.704	1249.02	2987.77	1839.81	2070.85	7521.63	1711.05	2264.37	860.55	1032.38	1660.11	10000.9	3591.28	3596.46	8980.49	934.32	749.722	2029.09	1776.79	3227.14	424.462	1521.1	2355.84	418.385				1351.86	706.136	883.42	1197.4	4340.29	4024.17	3825.24	5924.25	4549.01
3632.87	1077.21	805.304	2204.3	408.78	948.893	552.018	791.095	727.667	559.565	319.494	1687.81	2040.99	9117.05	1020.46	1313.91	3152.09	1916.49	2149.81	7779.12	1790.3	2388.08	889.548	1075.1	1749.65	10381.1	3769.1	3732.87	9515.24	968.899	758.869	2143.7	1865.77	3358.15	442.488	1598.53	2462.01	436.642				1427.87	730.69	904.244	1230.57	4554.41	4226.24	3989.77	6221.2	4617.19
3784.25	1133.78	834.976	2296.35	425.293	995.024	580.653	831.06	755.102	575.647	334.407	1791.8	2148.44	9447.26	1049.02	1379.37	3315.31	1990.11	2224.57	8031.93	1875.2	2505.06	918.719	1121.19	1840.05	10748.9	3949.98	3866.41	10065.4	1002.56	769.515	2261.33	1955.28	3496.31	460.293	1676.96	2567.71	454.599				1506.84	756.359	924.593	1263.44	4778.15	4429.59	4137.11	6519.72	4688.49
3930.3	1191.51	865.687	2390.04	441.078	1041.23	604.741	872.054	782.59	591.337	349.127	1897.11	2257.77	9769.63	1080.14	1447.51	3483.33	2066.88	2301.04	8276.2	1962.48	2614.26	947.265	1175.86	1933.05	11106.4	4129.77	3993.01	10631.1	1034.39	781.133	2383.43	2045.79	3635.17	477.904	1754.34	2673.46	472.458				1590.95	780.795	946.958	1292.95	5017.53	4632.8	4284.38	6817.63	4764.54
4072.5	1250.31	897.103	2486.93	458.576	1088.5	632.012	912.727	810.624	608.576	363.6	2006.11	2369.93	10095.9	1112.88	1521.48	3657.24	2145.62	2376.83	8511.48	2046.67	2714.76	976.673	1239.18	2027.65	11447.4	4306.03	4115.08	11211.9	1065.3	787.285	2509.96	2137.74	3778.4	494.515	1836.73	2779.84	490.25				1674.19	805.921	967.891	1327.09	5258.28	4833.78	4434.5	7115.33	4845.24
4216.7	1310.82	927.573	2584.23	475.793	1137.34	659.762	955.433	838.5	627.098	378.579	2117.55	2484.76	10427.8	1146.36	1599.48	3808.54	2225.4	2453.18	8740.16	2121.76	2813.46	1004.97	1308.69	2123.87	11765.7	4480	4227.16	11808.1	1093.6	795.22	2638.62	2232.4	3929.05	510.78	1919.95	2885.79	507.947				1761.09	831.567	988.409	1356.38	5492.36	5031.32	4580.83	7416.3	4926.35
4363.59	1371.6	957.644	2682.42	494.73	1187.13	688.104	990.184	866.515	647.853	393.503	2233.02	2600.67	10754.5	1181.73	1684.14	3958.99	2308.52	2525.37	8974.4	2189.17	2914.36	1032.43	1385.39	2221.73	12070.3	4653.24	4331.1	12419	1122.09	803.589	2769.8	2321.16	4084.16	526.779	2004.99	2992.06	525.712				1849.62	858.571	1009.01	1386.87	5744.38	5226.09	4733.34	7722.65	5008.41
4509.67	1432.91	987.765	2776.3	510.642	1237.04	717.105	1025.12	894.414	671.272	407.84	2351.41	2717.26	11049	1216.78	1770.44	4115.51	2396.05	2594.54	9209.42	2253.96	3020.77	1059.13	1466.61	2320.89	12359	4829.34	4424.45	13041.7	1148.13	813.432	2904.91	2412.54	4242.24	542.481	2089.92	3097.78	543.143				1940.73	885.247	1030.1	1423.31	6013.61	5417.88	4881.88	8034.75	5097.46
4656.85	1493.32	1018.86	2874.41	525.354	1287.32	746.596	1061.43	921.665	694.453	422.739	2474.84	2835.26	11319.3	1255.36	1853.24	4293.37	2485.07	2669.66	9437.72	2318.98	3129.57	1085.16	1555.83	2420.9	12634	5010.45	4509.65	13676.3	1174.26	821.279	3046.16	2504.81	4405.12	559.168	2177.73	3204.34	560.335				2034.29	911.553	1051.26	1459.22	6270.3	5604.78	5032.7	8351.05	5195.11
4798.19	1553.85	1050.45	2969.41	540.513	1337.62	775.869	1099.14	949.9	718.2	437.494	2602.42	2954.93	11580.6	1295.78	1938.29	4485.56	2575.35	2744.1	9654.26	2386.2	3240.91	1110.19	1646.99	2521.93	12891.2	5192.15	4588.16	14325.2	1199.33	825.169	3189.57	2598.53	4571.48	576.538	2266.28	3310.88	577.41				2129.55	937.913	1072.42	1498.84	6578.49	5783.54	5178.45	8674.12	5299.43
4936.37	1614.11	1086.04	3068.78	556.692	1390.46	804.019	1134.99	978.736	741.704	452.384	2734.88	3074.8	11835.1	1338.57	2026.6	4683.74	2664.03	2812.88	9860.7	2468.39	3351.31	1135.84	1724.62	2625.91	13140	5376.25	4663.39	14981.6	1224.84	832.038	3334.92	2693.75	4738.96	594.497	2355.14	3417.7	594.426				2229.17	962.289	1093.57	1529.77	6878.06	5959.09	5310.5	9000.91	5416.61
5064.97	1674.15	1123.66	3175.38	574.709	1443.89	832.304	1172.32	1006.74	764.627	467.513	2866.93	3195.17	12079.4	1382.56	2113.99	4891.99	2752.4	2874.73	10054.1	2558.92	3459.2	1159.57	1816.21	2732.24	13383.5	5561.4	4734.89	15647.1	1247.01	840.278	3479.74	2790.13	4908.78	612.278	2446.11	3524.69	611.376				2327.76	986.082	1114.2	1553.89	7203.44	6128.7	5435.47	9334.58	5557.7
5188.42	1733.51	1160.09	3289.41	588.357	1497.85	859.471	1211.61	1034.26	787.822	483.382	3002.87	3316.69	12310.1	1426.23	2199.35	5103.48	2845.62	2931.5	10238.6	2640.22	3561.13	1183.48	1909.82	2840.62	13615	5748.65	4815.79	16325.2	1264.39	844.783	3624.77	2891.55	5082.79	630.159	2537.49	3631.24	628.355				2427.78	1010.46	1134.95	1573.9	7534.83	6288.7	5552.93	9677.86	5715.57
5310.91	1792.99	1195.33	3408.74	602.442	1550.76	884.718	1248.58	1062.67	812.25	499.09	3142.73	3436.05	12517.9	1469.71	2283.43	5322.26	2940.56	2989.6	10418.5	2714.92	3663.84	1206.28	2004	2950.49	13829.8	5937.94	4904.2	17010.9	1282.46	846.699	3772.47	2996.67	5261.03	648.327	2630.53	3737.49	645.162				2530.04	1034.63	1154.54	1591.93	7884.84	6441.84	5679.42	10029.1	5895.67
5436.97	1853.12	1230.37	3526.45	619.677	1606.85	909.716	1285.6	1090.03	838.761	515.387	3285.99	3555.71	12707.1	1515.45	2365.74	5547.96	3033.99	3041.32	10583.9	2784.97	3766.38	1223.66	2095.57	3063.1	14026.4	6127.91	5008.4	17703.1	1302.25	848.303	3920.71	3104.82	5446.37	667.439	2723.29	3843.41	661.744				2630.26	1058.23	1173.72	1604.84	8237.27	6594.32	5806.53	10381.1	6084.67
5573.37	1913.65	1262.2	3645.63	642.571	1662.16	934.084	1322.97	1119.16	866.474	531.461	3433	3675.66	12874.1	1563.98	2448.87	5748.23	3119.03	3091.73	10731.2	2852.27	3870.92	1238.86	2185.21	3177.25	14208.5	6321.64	5120	18402.2	1321.73	847.818	4072.15	3215.84	5632.26	687.396	2818.04	3948.1	678.035				2733.98	1079.41	1192.68	1613.57	8583.38	6738.91	5930.35	10736.5	6288.48
5718.01	1974.13	1294.45	3770.54	665.549	1714.01	958.719	1360.1	1147.88	895.686	548.281	3582	3798.14	13020.9	1615.97	2533.2	5958.19	3205.14	3141.53	10861.5	2934.82	3980.99	1252.5	2274.53	3291.95	14374.8	6520.28	5239.11	19111.9	1339.95	846.438	4223.28	3324.53	5818.28	708.993	2913.43	4053.33	694.185				2840.18	1098.99	1211.78	1623.86	8937.1	6876.33	6058.59	11094.5	6489.41
5863.73	2034.05	1327.44	3903.14	691.947	1760.4	983.73	1398.3	1176.69	925.257	565.533	3733.82	3922.77	13146.3	1670.18	2615.61	6170.05	3298.07	3188.38	10980.3	3058.68	4081.26	1267.17	2359.14	3408.35	14524.1	6720.79	5366.78	19822.4	1361.28	843.711	4380.8	3438.78	6005.31	731.743	3008.66	4159.3	709.982				2957.73	1118.66	1229.17	1631.49	9260.94	7007.93	6181.2	11459.4	6708.64
6012.55	2093.3	1360.05	4036.13	715.245	1807.11	1007.32	1439.37	1207.42	954.49	583.748	3888.55	4046.99	13256.9	1726.23	2698.72	6375.7	3390.62	3225.2	11089.9	3182.89	4165.83	1282.32	2440.56	3527.36	14655.9	6927.15	5494.11	20537.8	1383.54	843.47	4544.08	3555.98	6196.34	755.53	3102.18	4264.18	725.66				3059.23	1139.47	1245.89	1642.93	9564.3	7132.97	6307.83	11829.8	6947.36
6165.64	2152.02	1392.63	4171.67	738.067	1854.82	1028.47	1481.43	1238.35	983.56	602.607	4047.23	4171.77	13343.8	1782.21	2785.9	6573.9	3488.94	3246.89	11198.6	3301.53	4254.42	1298.87	2519.52	3648.68	14753.8	7138.75	5614.89	21260.7	1400.51	845.673	4709.23	3674.51	6376.54	780.7	3196.47	4367.31	741.05				3161.45	1158.97	1262.15	1621.09	9849.88	7250.99	6437.31	12200.8	7215.77
6316.59	2208.84	1426.29	4309.21	761.53	1902.85	1046.38	1521.18	1269	1012.32	620.913	4209.29	4294.79	13419.1	1838.44	2860.52	6751.32	3595.69	3268.14	11304.3	3401.01	4344.79	1311.77	2588.98	3772.83	14826.8	7360.58	5731.65	21991	1418.71	848.443	4877.02	3791.18	6552.42	805.872	3290.38	4468.06	756.439				3266.61	1178.53	1277.06	1637.62	10113.1	7363.88	6567.47	12571.3	7493.43
6469.95	2264.8	1456.53	4447.09	783.764	1951.7	1061.44	1562.24	1300.88	1041.32	639.054	4376.11	4417.57	13476.6	1895.84	2936.45	6924.05	3709.96	3284.85	11407.6	3485.43	4433.78	1326.27	2650.84	3899.76	14859.5	7583.28	5849.32	22723.8	1436.67	851.77	5050.84	3898.38	6726.32	830.885	3386.05	4566.69	771.529				3374	1197.26	1291.22	1658.35	10380.8	7470.51	6689.83	12934	7780.43
6631.05	2321.49	1484.41	4586.2	804.864	1999.32	1079.88	1605.44	1334.23	1071.31	657.782	4548.59	4539.33	13521.8	1955.75	3010.48	7106.59	3825.44	3300.41	11516.8	3574.61	4519.69	1340.31	2711.56	4028.98	14867.8	7805.16	5968.92	23462.9	1456.89	855.946	5228.91	4006.37	6898.38	855.265	3482.45	4665.7	786.669				3486.32	1215.55	1304.97	1683.39	10631.7	7570.16	6813.1	13290.8	8085.49
6795.73	2378.55	1512.05	4722.3	830.699	2047.69	1099.66	1649.1	1367.32	1101.83	677.411	4725.48	4660.02	13525.6	2016.18	3088.6	7292.87	3938.81	3312.91	11624.1	3678.6	4604.59	1352.95	2773.71	4160.42	14850.5	8023.81	6089.25	24210	1478.51	859.322	5408.74	4111.26	7057	880.712	3579.32	4763.49	801.515				3602.62	1232.99	1318.47	1708.13	10906.1	7662.86	6927.4	13640.5	8410.6
6968.51	2436.57	1537.61	4859.12	857.807	2097.34	1120.08	1693.17	1401.23	1133.18	698.407	4905.46	4781.17	13512.5	2077.73	3164.55	7486.04	4054.04	3331.45	11734.7	3789.19	4691.53	1367.23	2838.26	4295.47	14804.6	8246.79	6206.55	24966.2	1500.23	859.193	5588.4	4208.8	7195.37	907.579	3676.92	4860.92	816.386				3716.88	1251.17	1332.65	1725.7	11199.1	7750.32	7033.65	13976.9	8758.66
7147.97	2495.49	1561.78	4998.69	887.826	2148.1	1139.92	1736.47	1437.1	1164.77	720.382	5090.52	4900.18	13500.7	2138.97	3241.33	7679.35	4172.52	3347.25	11845.6	3890.89	4786.16	1385.45	2901.7	4431.53	14739.2	8476.98	6319.26	25724.2	1514.81	860.535	5770.93	4293.01	7322.61	934.799	3776.15	4957.87	831.431				3834.34	1269.23	1346.42	1737.86	11502.8	7831.26	7153.94	14306	9124.68
7339.94	2555.08	1587.94	5137.65	917.657	2196.2	1159.5	1779.94	1472.94	1196.61	742.734	5282.97	5019.26	13500.3	2200.27	3320.68	7871.09	4293.21	3359.42	11955.1	3978.45	4878.58	1408.38	2966.41	4566.68	14650.8	8718.15	6432.48	26463.1	1527.49	860.14	5954.64	4373.47	7442.31	963.126	3876.51	5054.15	846.314				3952.94	1286.31	1358.94	1750.92	11799.1	7907.78	7270.44	14628.5	9492.59
7540.92	2616.82	1612.86	5271.8	943.465	2242.88	1180.55	1826.65	1510.2	1227.68	765.535	5476.44	5139.03	13508.6	2262.1	3401.44	8052.54	4417.23	3371.81	12064.3	4055.11	4970.77	1434.03	3030.5	4703.32	14561.4	8965.95	6546.35	27232.9	1547.15	862.148	6140.99	4450.71	7559.47	992.352	3976.6	5151.74	862.14				4072.29	1302.84	1369.89	1768.65	12096.8	7981.56	7392.56	14950.3	9855.66
7742.1	2679.58	1636.84	5407.17	970.255	2288.58	1201.21	1875.9	1548.69	1260.01	787.738	5669.35	5260.89	13503.2	2324.24	3482.87	8229.85	4538.64	3394.95	12169.8	4140.16	5057.55	1461.76	3097.35	4841.7	14468.3	9220.09	6661.85	28007.8	1566.35	868.809	6329.5	4561.21	7685.82	1022.88	4079.01	5251.17	878.141				4194.23	1318.87	1378.77	1786.13	12388.5	8056.98	7520.67	15270.9	10214.6
7947.47	2742.59	1661.04	5539.89	996.957	2334.24	1220.61	1926.29	1588.56	1291.77	809.414	5863.69	5383.11	13495	2387.94	3564.12	8426.98	4665.87	3422.82	12273	4234.38	5143.94	1491.22	3167.91	4979.46	14361	9484.71	6779.99	28786.9	1587.32	870.6	6520.96	4674.16	7797.41	1055.11	4178.57	5351.53	894.405				4317.05	1333.32	1386.86	1806.74	12676.3	8128.24	7656.16	15590.6	10570.5
8158.49	2804.46	1686.54	5672.93	1018.12	2378.73	1240.43	1975.92	1629.49	1324.19	829.813	6061.35	5506.47	13487.4	2453.63	3645.42	8638.47	4793.67	3434.04	12372	4335.2	5237.55	1523.21	3241.12	5116.5	14246.5	9751.53	6891.86	29572.7	1610.65	873.345	6715.7	4790.19	7901.29	1087.95	4280.97	5452.44	911.066				4440.11	1344.12	1394.48	1822.75	12964	8198.24	7781.06	15914.1	10916
8375.47	2867.04	1711.15	5803.15	1043.54	2424.73	1261.36	2027.36	1668.97	1356.58	850.319	6263.58	5630.36	13499.9	2521.38	3723.48	8853.68	4915.63	3436.16	12466.8	4431.41	5331.67	1557.12	3318.22	5255.93	14123.2	10031.1	7003.46	30360.1	1632.17	878.051	6914.72	4908.95	7998.23	1121.58	4385.41	5554.22	928.13				4569.28	1356.49	1401.62	1844.82	13247.2	8264.81	7881.21	16239.4	11258.4
8605.8	2928.23	1733.42	5935.09	1072.01	2468.17	1281.72	2081.21	1710.2	1388.39	870.511	6470.94	5753.44	13529.3	2592.01	3798.43	9071.39	5037.87	3428.77	12578.4	4520.89	5431.2	1592.71	3400.92	5395.87	13986.4	10317.8	7115.7	31156.6	1653.87	885.942	7115.3	5007.55	8102.28	1156.5	4492.39	5657.42	945.857				4697.83	1367.92	1408.51	1863.17	13540.4	8331.22	8016.02	16557.9	11605.7
8849.13	2986.74	1753.97	6069.96	1105.12	2509.87	1303.75	2136.87	1749.36	1419.49	890.676	6681.66	5873.63	13545.2	2665.32	3872	9285.12	5146.79	3420.24	12698.5	4614.07	5532.65	1630.61	3491.62	5537.67	13851.5	10608.7	7226.84	31953.5	1676.72	887.868	7317.09	5110.77	8207.42	1192.44	4599.04	5761.16	963.856				4825.96	1377.74	1415.36	1864.17	13822.2	8402.14	8152.28	16860.9	11944.4
9103.2	3045.98	1773.21	6207.66	1137.25	2553.56	1326.49	2193.61	1790.41	1451.3	909.956	6897.96	5993.96	13574.1	2738.97	3945.76	9494.73	5255.81	3425.68	12825.3	4724.04	5631.81	1669.51	3585.72	5681.52	13707.7	10892.4	7352.61	32743.9	1698.99	887.044	7508.7	5218.7	8313.79	1229.41	4707.49	5866.61	981.969				4951.02	1387.89	1422.87	1906.89	14116.3	8478.87	8288.12	17150.7	12276.5
9363.62	3106.45	1791.37	6347.19	1165.98	2600.17	1350.29	2249.17	1834.21	1482.36	927.612	7119.4	6115.33	13612.6	2811.23	4015.31	9715.33	5374.01	3447.32	12954.1	4849.91	5734.78	1708.89	3678.99	5828.59	13582.7	11184	7478.76	33521.2	1721.81	890.507	7704.43	5329.77	8418.39	1265.87	4816.53	5974.95	1000.25				5075.29	1394.87	1431.34	1937.69	14411.5	8551.47	8432.01	17436.5	12584.5
9622.55	3166.4	1810.56	6485.94	1190.82	2646.74	1375.42	2306.13	1878.88	1515.36	944.647	7346.84	6237.28	13661.2	2880.53	4077.14	9959.82	5499.48	3466.8	13083.4	4988.44	5837.4	1750.3	3775.32	5978.22	13477.1	11481.3	7602.77	34295.9	1747.81	894.113	7901.11	5443.83	8521.03	1303.34	4926.73	6085.58	1018.92				5201.13	1402.2	1433.94	1968.86	14718.2	8622.48	8584.39	17711.8	12881.2
9881.6	3225.7	1827.81	6624.56	1218.85	2693.48	1399.76	2364.95	1924.31	1548.47	962.515	7581.12	6359.37	13721.9	2951.29	4137.69	10191.7	5618.94	3489.28	13212.3	5113.83	5936.73	1796.2	3870.58	6130.02	13396.5	11777	7732.38	35060.9	1774.9	897.811	8101.14	5561.08	8650.16	1341.74	5039.45	6197.67	1037.76				5313.46	1409.05	1436.28	2007.89	15028.5	8696.8	8747.48	17980	13175.8
10145.5	3286.4	1840.06	6765.02	1238.63	2741.48	1425.24	2427.28	1969.76	1582.71	981.214	7815.36	6482.24	13770.8	3023.14	4199.58	10431.3	5731.89	3510.1	13336.1	5213.66	6032.94	1847.86	3968.66	6284.83	13336.2	12069.5	7845.5	35814.2	1802.25	904.305	8299.63	5683.24	8776.35	1380.52	5151.81	6308.76	1056.51				5427.48	1415.65	1438.31	2042.31	15348	8773.34	8920.35	18239.9	13468.8
10414.8	3344.72	1851.08	6903.57	1268.14	2791.42	1450.14	2490.93	2016.77	1616.19	1001.45	8049.52	6606.52	13833.5	3097.38	4261.72	10664.1	5845.53	3526.32	13441.3	5304.72	6128.8	1900.31	4067.37	6442.28	13287.4	12356.3	7928.02	36563.1	1830.1	909.892	8495.59	5805.54	8906.42	1420.43	5267.12	6419.13	1075.24				5541.53	1420.25	1439.75	2097.46	15681.9	8849.74	9100.35	18493.6	13764.4
10684.1	3400.2	1856.26	7042.69	1297.01	2843.18	1475.53	2551.93	2068.05	1647.68	1022.5	8284.54	6732.47	13909.5	3173.55	4325.38	10894.2	5962.87	3553.33	13517.6	5412.14	6216.3	1954.5	4165.31	6602.67	13247.1	12638.9	8011.57	37309.9	1858.65	918.837	8688.41	5929.3	9033.42	1460.37	5384.19	6529.84	1093.95				5657.75	1422.4	1440.72	2137.02	16030.5	8932.35	9285.92	18748	14065.3
10957.3	3455.41	1862.08	7180.09	1329.88	2896.04	1502.13	2610.33	2116.34	1678.34	1043.55	8523.1	6855.34	13980	3250.23	4388	11133.4	6089.12	3600.43	13585.5	5540.16	6290.55	2011.91	4266.25	6763.16	13208	12914.9	8086.7	38056.3	1888.41	925.273	8883.45	6056.19	9158.04	1501.06	5505.86	6641.47	1112.62				5777.06	1424.14	1441.39	2174.69	16385	9019.77	9477.8	19001.2	14374.4
11233.4	3511.58	1872.31	7324.79	1366.76	2949.85	1530.18	2672.44	2167.65	1708.72	1065.41	8768.17	6979.43	14048	3324.96	4450.13	11371.5	6215.86	3636.43	13632.9	5698.1	6352.43	2070.87	4362.87	6921.8	13161.5	13189.1	8156.13	38794.8	1918.65	935.835	9078.26	6184.46	9283.36	1540.97	5628.06	6752.99	1131.04				5900.83	1424.39	1443.57	2222.65	16754.2	9113.98	9677.03	19251.4	14682.2
11515.7	3568	1887.1	7477.7	1405.8	3003.56	1559.18	2735.29	2220.17	1738.83	1088.74	9020.34	7102.99	14112	3394.91	4508.6	11621.1	6344.18	3658.1	13661.9	5861.37	6413.22	2128	4442.02	7080.51	13118.5	13452.2	8223.68	39489.5	1945.25	950.802	9261.92	6314.58	9409.9	1581.38	5751.2	6862.45	1148.54				6031.74	1421.95	1441.29	2273.4	17138.6	9211.98	9886.7	19488.3	14988.8
11796.1	3625.08	1901.5	7612.38	1449.34	3060.72	1589.83	2802.34	2275.04	1768.57	1113.1	9281.25	7226.1	14178.3	3462.1	4566.05	11871.5	6461.46	3674.46	13696	6029.33	6473.29	2183.53	4526.77	7237.51	13078.3	13700.7	8289.98	40136.2	1971.8	961.448	9443.74	6448.79	9535.22	1622.3	5876.36	6970.18	1165.02				6162.53	1420.14	1435.49	2318.88	17515.1	9316.35	10105.4	19736.1	15297.4
12080.7	3683.34	1915.12	7768.04	1497.98	3120.61	1622.15	2864.65	2330.23	1795.89	1138.46	9547.73	7345.83	14245.8	3526.85	4620.9	12129.4	6578.64	3688.71	13720.5	6194.56	6534.42	2237.31	4608.81	7394.69	13035.3	13944.2	8353.69	40769.6	1999.52	970.839	9632.31	6583.84	9662.75	1662.49	6003.13	7078.03	1181.34				6295.93	1416.31	1434.7	2359.35	17900.5	9424.15	10338.1	19983.4	15609.6
12367.5	3741.72	1927.97	7935.18	1528.54	3182.98	1654.28	2930.63	2384.11	1821.68	1163.91	9820.41	7465.58	14323.1	3588.1	4672.72	12392	6704.29	3704.36	13741.2	6348.16	6590.75	2291	4698.85	7551.41	12994.5	14185	8415.35	41381.6	2019.76	981.943	9821.81	6720.53	9791.5	1703.15	6129	7185.4	1197.43				6430.63	1412.59	1439.72	2395.25	18283.6	9534.51	10575.6	20226.3	15926.1
12655.1	3799.32	1939.7	8105.07	1562.24	3246.05	1688.15	2999.39	2440.35	1844.96	1186.02	10095	7588.29	14422.4	3647.89	4697.95	12671.6	6830.04	3737.53	13739.8	6506.93	6641.52	2348.35	4793.75	7706.05	12985.9	14421	8467.93	41985	2040.11	997.287	10015.7	6862.65	9925.07	1744.96	6256.52	7294.32	1213.57				6564.17	1406.39	1449.48	2426.99	18654.6	9650.67	10820.7	20470.5	16239.8
12944.8	3856.04	1948.75	8283.5	1596.45	3310.4	1722.36	3071.94	2496.46	1867.98	1205.77	10370.4	7712.55	14543.1	3706.77	4720.45	12961.4	6958.84	3777.31	13741.2	6675.59	6695.4	2407.32	4892.12	7859.93	12979.3	14655.4	8519.34	42580.8	2058.88	1009.48	10214.5	7006.45	10057.7	1786.92	6387.68	7405.1	1229.79				6698.72	1398.71	1460.79	2466.07	19035.3	9775.8	11073.1	20726.7	16543.9
13238.6	3913.02	1955.06	8465.93	1629.72	3375.63	1756.13	3144.48	2558.07	1890.27	1225.67	10644.2	7831.37	14694.4	3764.57	4743.07	13262.5	7082.43	3814.06	13737.5	6837.82	6756.18	2470.31	4987.74	8018.5	12992	14889.6	8540.57	43168.1	2078.67	1018.69	10416.2	7154.78	10193.5	1829.24	6521.29	7516.67	1246.16				6830.26	1388.53	1474.42	2492.44	19433.5	9907.88	11339.6	20974.6	16839.8
13529.6	3969.8	1959.21	8655.64	1662.8	3440.55	1789.13	3217.19	2617.71	1913.43	1245.45	10915.5	7951.23	14849.1	3811.74	4771.27	13567.7	7206.19	3827.32	13723.1	6984.27	6814.22	2536.42	5088.97	8176.73	13024.4	15120.7	8564.71	43752.3	2098.54	1029.65	10620.3	7296.63	10325.2	1871.94	6649.98	7627.18	1262.65				6962.31	1377.77	1491.13	2520.15	19843.8	10052.7	11617.4	21219.6	17133.2
13819	4025.59	1967.2	8854.95	1697.92	3506.92	1823.22	3292.04	2677.9	1937.31	1265	11184.6	8072.75	15023.3	3858.86	4796.03	13880.7	7330.03	3841.28	13686.6	7090.9	6869.75	2602.73	5188.7	8335.9	13081.1	15356.2	8603.11	44336.4	2117.59	1039.36	10823.1	7441.13	10459.9	1914.31	6771.39	7738.13	1279.37				7091.07	1365.23	1508.97	2551.18	20270.3	10204.6	11887.1	21461.2	17425.9
14116.3	4079.82	1973.57	9065.56	1734.27	3571.8	1858.03	3367.16	2740.07	1960.38	1285.61	11457.2	8193.55	15230.6	3910.21	4819.31	14213.7	7452.74	3873.27	13607.9	7145.98	6924.02	2670.93	5286.46	8496.44	13154.6	15595.3	8631.25	44913.5	2133.66	1052.14	11022.3	7589.43	10602.3	1957.01	6904.15	7849.74	1296.16				7219.65	1353.42	1528.74	2589.36	20703.2	10363.3	12170.5	21697.5	17712.5
14423.6	4134.5	1977.77	9287.73	1773.03	3594.45	1892.77	3442.41	2801.19	1984.8	1304.16	11732.5	8314.86	15476.8	3959.34	4841.68	14547.8	7577.66	3907.51	13523.5	7187.96	6983.89	2740.08	5392.35	8654.6	13263.1	15836.1	8655.94	45476.2	2150.04	1063.34	11214.8	7740.6	10747.6	1999.47	7029.77	7962.05	1313.16				7345.21	1344	1549.53	2628.08	21147.3	10529	12455	21894.2	18006.5
14736.2	4189.71	1980.39	9518.77	1807.87	3616.89	1927.6	3520.11	2859.34	2008.26	1322.52	12013.2	8432.68	15762.7	4007.72	4867.36	14841.6	7710.63	3931.61	13448.4	7238.14	7046.19	2809.37	5500.6	8810.71	13404.9	16078	8672.11	46023.8	2168.3	1071.51	11406.8	7895.22	10897.4	2043.46	7152.01	8075.61	1330.17				7465.65	1332.51	1570.7	2674.12	21598.1	10705.1	12753.4	22115.7	18323.8
15046.5	4244.16	1982.87	9752.2	1844.54	3640.23	1963.02	3595.63	2916.62	2032.37	1342.36	12301.6	8544.73	16079.4	4051.79	4898.43	15143.5	7845.45	3953.95	13367.9	7293.08	7111.7	2878.74	5614.89	8960.43	13567	16314.5	8689.39	46541.5	2188.26	1083.04	11593.7	8051.95	11044.4	2087.84	7278.68	8190.17	1346.73				7588.49	1319.7	1592.75	2735.01	22067.7	10890.7	13059.7	22339.3	18663.4
15344.9	4300.26	1984.96	9992.99	1882.04	3663.82	1997.22	3670.42	2975.08	2059.01	1363.07	12586.8	8653.5	16412	4086.74	4928.68	15442.3	7978.46	3974.49	13305.7	7353.01	7184.48	2941.68	5728.95	9108.21	13760.9	16547.9	8700.62	47043.6	2208.96	1103.96	11780.7	8211.57	11193.1	2133.6	7397.5	8305.59	1363.17				7715.93	1305.32	1616.27	2802.69	22536.1	11086.7	13362.3	22573.8	19023.6
15631	4360.52	1989.18	10255.2	1918.7	3688.11	2030.29	3745.75	3033.95	2084.79	1383.98	12876.8	8758.55	16770.5	4116.33	4953.69	15739.3	8107.88	3995.34	13231.3	7420.29	7262.62	3006.62	5843.04	9253.84	13970.8	16779.7	8706.07	47520.9	2228.28	1127.48	11969.3	8376.95	11340.9	2180.68	7479.02	8420.49	1379.25				7840.95	1290.35	1639.67	2866.09	23005.4	11299.7	13678.6	22836.6	19407.5
15937.6	4424.14	1992.71	10519.3	1956.8	3707.79	2063.95	3822.79	3096.12	2112.42	1405.22	13166.1	8861.46	17136.2	4143.75	4975.58	16038	8247.78	4017.46	13155.3	7489.1	7343.69	3075.27	5958.61	9403.14	14192.9	17009.8	8709.52	47988.3	2243.47	1145.25	12156.2	8546.8	11490.7	2228.7	7609.96	8538.11	1395.34				7957.58	1275.23	1662.68	2923.62	23466.9	11522.8	14001.5	23124.2	19823.8
16254.2	4489.66	1993.33	10786.6	1994.33	3726.17	2096.63	3902.46	3156.09	2137.42	1427.42	13453.1	8962.32	17503.1	4175.26	4998.16	16344.1	8390.35	4040.35	13073.7	7569.62	7434.62	3147.25	6073.03	9553.96	14420.9	17242.1	8706.6	48449.8	2261.2	1161.64	12343.9	8720.05	11641.1	2276.97	7742.82	8656.95	1411.48				8076.1	1259.72	1686.6	2977.44	23897.2	11758.2	14328.6	23440.6	20249
16574.9	4555.42	1993.93	11061.8	2028.43	3744.05	2128.51	3982.61	3219.22	2162.05	1451.05	13741.7	9063.83	17858.1	4204.98	5019.53	16657.4	8534.29	4063.09	12989.3	7667.87	7530.06	3219.61	6186.66	9705.69	14644.6	17469.8	8701.05	48910.9	2285.54	1177.06	12531	8892.17	11795	2323.11	7877.34	8776.43	1427.65				8194.86	1247.56	1713.09	3026.5	24342.8	12006.7	14647.6	23780.1	20693.1
16908.7	4623.91	1989.69	11342.5	2066.94	3762.37	2161.66	4062.06	3282.87	2184.21	1475.95	14033.5	9161.6	18214.2	4231.55	5043.45	16981.2	8683.73	4084.92	12903.1	7778.34	7629.51	3294.84	6300.8	9857.11	14852.1	17695.9	8687.61	49372.2	2311.63	1193.09	12714	9068.6	11952.6	2369.32	8015	8896.97	1443.97				8304.27	1239.88	1740.4	3081.18	24760.2	12266.7	14976	24136.9	21106.1
17251.3	4695.55	1983.53	11628.6	2104.02	3780.4	2193.89	4142.73	3347.11	2205.19	1498.37	14325.3	9254.79	18571.7	4252.59	5066.25	17290.8	8829.23	4097.22	12814.4	7903.15	7729.27	3368.56	6410.2	10009.2	15044.5	17925.8	8669.74	49831.4	2339.66	1213.12	12898.4	9250.21	12118.1	2416.21	8152.69	9017.03	1460.34				8416.01	1231.84	1767.77	3133.66	25179.7	12538.1	15317.8	24516.2	21537.1
17582.6	4768.36	1982.72	11916.7	2141.67	3798.25	2227.57	4224.75	3411.88	2224.5	1522.58	14616.7	9345.35	18932	4270.72	5087.77	17586.7	8988.48	4095.25	12719.1	8042.58	7829.37	3439.4	6523.4	10162.6	15221.9	18162.6	8657.07	50235.6	2367.01	1230.33	13086.6	9433.19	12288.5	2463.23	8290.81	9135.49	1475.52				8527.42	1223.48	1794.86	3189.37	25598	12818.9	15670	24916.9	21960.4
17899.4	4843.67	1989.34	12205.1	2177.59	3815.05	2260.73	4307.33	3478.85	2241.22	1547.9	14905.7	9431.25	19282.6	4286.68	5108.25	17879.5	9161.01	4083.9	12615.6	8175.72	7926.1	3508.45	6640.51	10320.8	15394.5	18405.1	8636.53	50638.7	2397.75	1243.54	13275.9	9617.45	12458.3	2510.87	8427.8	9252.74	1490.66				8642.1	1214.66	1820.48	3250.15	26016.7	13109.1	16026.6	25343.2	22391.5
18231.5	4917.5	1995.37	12505.9	2209.55	3832.41	2294.32	4392.13	3547.38	2260.9	1572.45	15195	9510.18	19649.6	4302.09	5127.96	18160.1	9344.81	4078.8	12501.6	8300.44	8015.36	3577.38	6766.11	10478.2	15559.7	18657.5	8605.53	51037.8	2421.19	1251.91	13466.5	9798.45	12621.7	2557.64	8547.97	9369.25	1505.99				8752.66	1206.43	1845.32	3322.94	26438.3	13407.5	16393.4	25777	22830.8
18570.5	4993.07	2002.76	12813	2244.84	3849.47	2327.34	4477.02	3617.11	2283.89	1595.61	15475.4	9583.24	20045.6	4323.13	5148.16	18441.3	9518.69	4076.08	12382.7	8430.18	8098.29	3648.45	6895.9	10642.4	15723.4	18915.2	8568.34	51434.7	2445.34	1258.98	13656.2	9979.89	12782.5	2605.07	8667.83	9486.71	1521.51				8893.25	1199.15	1869.01	3408.11	26862	13715.1	16752.4	26186.6	23252.2
18908	5069.17	2011.3	13113.6	2283.55	3866.42	2359.51	4560.73	3689.53	2313.78	1620.32	15734.5	9648.2	20445.5	4345.44	5170.24	18733	9693.3	4083.56	12253.9	8546.56	8181.67	3716.35	7024.59	10805.4	15864.7	19169.9	8526.4	51817.5	2470.16	1280.5	13842.5	10159.6	12945.2	2653.43	8785.8	9602.6	1536.59				9027.39	1192.18	1891.63	3498.41	27427.8	14034.7	17087.2	26589.2	23678.3
[truncated: 26 more columns]

## Sheet: 2D- DirAuto Plotted Average
Source data for Fig. 2D: Plotted Average Directional Autocorrelation (Dir_Auto) and SEM. Dir_Auto calculated using DiPer software (Gorelik et al 2013) from trajectories show in Fig. 2B
Control(cKO) (Dir_Auto)				cKO (Dir_Auto)
Time	Avg	SEM		Time	Avg	SEM
0	1	0		0	1	0
5	0.4616	0.00891		5	0.50983	0.00847
10	0.33151	0.00954		10	0.43261	0.00881
15	0.2539	0.00987		15	0.36667	0.00902
20	0.22934	0.01005		20	0.32145	0.00924
25	0.25269	0.00998		25	0.30865	0.00931
30	0.20099	0.01008		30	0.26859	0.00943
35	0.19804	0.01014		35	0.23691	0.00954
40	0.19138	0.01017		40	0.21832	0.00965
45	0.18819	0.01014		45	0.19833	0.00971
50	0.19846	0.01019		50	0.1974	0.00976

## Sheet: 2E - Avg Speeds
Average speed of cells plotted in Fig. 2E. Speeds calculated using DiPer software (Gorelik et al 2013) from trajectories shown in Fig. 2B
Average Speed (μm/min)				Average Speed (μm/min)
Control(cKO)	cKO			Control(GoF)	GoF
0.63869	0.44108			1.75871	1.58353
0.28736	0.33678			1.1042	1.74696
0.398	0.41288			1.17752	0.95838
0.58131	0.97393			1.18305	1.59475
0.46025	1.06306			0.46333	0.84271
0.30339	0.53909			1.55708	1.0146
0.30926	0.89933			0.55654	1.52385
0.38914	0.85495			0.64481	1.07224
0.35361	1.07968			0.6292	0.33245
0.37484	1.18963			2.52871	1.54685
0.27177	0.5133			2.29173	0.58895
0.47564	0.33775			0.68789	1.27741
0.43863	0.4996			1.86769	1.56726
1.26934	0.70516			0.71804	0.86082
0.54947	0.24528			1.31342	0.82868
0.43349	1.25357			1.61539	1.13123
0.81034	1.27963			1.28109	1.08315
0.60815	1.87893			2.69538	0.58612
0.74765	0.20826			1.79856	1.1984
0.97874	0.36462			1.60261	1.10646
1.17282	1.09185			1.96321	1.11834
0.69529	0.85245			1.64515	1.58977
0.3993	0.82796			1.50308	0.98669
0.56593	0.33522			1.99051	1.07235
0.35947	0.47392			2.23901	1.77088
1.02887	1.25635			1.60663	1.00991
0.51066	0.25573			1.38839	1.06075
0.61398	0.86471			0.96459	1.82181
0.83512	0.89997			1.15463	1.79491
0.34803	0.37024			1.18073	1.37972
0.66094	0.88946			1.49914	1.2912
0.45322	0.32997			2.51613	0.42521
0.42403	2.08679			1.2736	0.7906
0.56031				0.64481	2.37724
0.24693				0.90301	2.00084
0.49804				0.36035	0.63718
				0.36076	1.7833
				1.47083	1.19318
				0.62994	1.90137
				0.80213	1.65962
				1.66686	1.60621
				1.81671	0.71802
				1.33454	1.06508
				1.67365	0.92221
				0.75521	0.9779
				1.67756	0.39552
				0.82322	0.63381
				1.33715	0.33736
				0.56703	1.11745
				1.42926	0.8843
				0.31216	0.32962
				0.25981	0.68949
				0.49019	0.99635
					0.65511
					0.95224
					0.71708
					0.73365
					0.89183
					0.7872
					1.04392
					0.86078
					1.86824
					1.49928
					0.73382
					0.56746
					0.67321
					0.54893
					0.77352
					0.74374
