# Supplementary material for: Spatiotemporal dynamics of PIEZO1 localization controls keratinocyte migration during wound healing
Source: eLife journal article supplement (doi:10.7554/elife.65415), 2021-09-27
Supplement: fig2-figsupp1-data1 [file elife-65415-fig2-figsupp1-data1-v3.xlsx]

## Sheet: SuppFig4-Con(cKO) Trajecto
Plotted Trajectories for Figure 2B and Supp Fig 3. Relative X and Relative Y are seen plotted for each trajectory
Cell 1					Cell 2					Cell 3					Cell 4					Cell 5					Cell 6					Cell 7					Cell 8					Cell 9					Cell 10
Frame	X Position	Y Position	relative X	relative Y	Frame	X Position	Y Position	relative X	relative Y	Frame	X Position	Y Position	relative X	relative Y	Frame	X Position	Y Position	relative X	relative Y	Frame	X Position	Y Position	relative X	relative Y	Frame	X Position	Y Position	relative X	relative Y	Frame	X Position	Y Position	relative X	relative Y	Frame	X Position	Y Position	relative X	relative Y	Frame	X Position	Y Position	relative X	relative Y	Frame	X Position	Y Position	relative X	relative Y
1	133	772			1	318	586	0	0	1	761	376	0	0	1	218	711	0	0	1	159	636	0	0	1	554	829	0	0	1	541	594	0	0	1	758	965	0	0	1	979	131	0	0	1	969	297	0	0
2	133	772	0	0	2	318	588	0	2	2	761	376	0	0	2	218	711	0	0	2	162	634	3	-2	2	555	828	1	-1	2	537	597	-4	3	2	755	966	-3	1	2	990	124	11	-7	2	969	295	0	-2
3	133	772	0	0	3	318	588	0	2	3	761	376	0	0	3	219	713	1	2	3	166	633	7	-3	3	555	828	1	-1	3	535	598	-6	4	3	753	965	-5	0	3	986	124	7	-7	3	969	289	0	-8
4	130	777	-3	5	4	317	588	-1	2	4	761	376	0	0	4	219	713	1	2	4	164	633	5	-3	4	554	828	0	-1	4	535	598	-6	4	4	753	967	-5	2	4	982	128	3	-3	4	966	286	-3	-11
5	130	778	-3	6	5	317	588	-1	2	5	761	376	0	0	5	219	715	1	4	5	159	626	0	-10	5	554	828	0	-1	5	536	597	-5	3	5	753	968	-5	3	5	981	129	2	-2	5	966	285	-3	-12
6	133	779	0	7	6	316	590	-2	4	6	763	376	2	0	6	219	715	1	4	6	158	623	-1	-13	6	554	828	0	-1	6	535	599	-6	5	6	749	970	-9	5	6	984	128	5	-3	6	961	288	-8	-9
7	137	783	4	11	7	316	589	-2	3	7	763	376	2	0	7	221	719	3	8	7	158	621	-1	-15	7	554	827	0	-2	7	535	599	-6	5	7	748	972	-10	7	7	983	129	4	-2	7	961	292	-8	-5
8	140	788	7	16	8	316	589	-2	3	8	765	376	4	0	8	221	719	3	8	8	161	618	2	-18	8	555	827	1	-2	8	535	599	-6	5	8	747	970	-11	5	8	982	128	3	-3	8	964	292	-5	-5
9	140	790	7	18	9	316	588	-2	2	9	765	379	4	3	9	222	720	4	9	9	162	618	3	-18	9	556	826	2	-3	9	536	598	-5	4	9	745	970	-13	5	9	980	129	1	-2	9	967	291	-2	-6
10	140	790	7	18	10	315	588	-3	2	10	766	381	5	5	10	227	720	9	9	10	164	618	5	-18	10	556	825	2	-4	10	537	597	-4	3	10	743	972	-15	7	10	978	129	-1	-2	10	967	291	-2	-6
11	140	791	7	19	11	315	589	-3	3	11	768	381	7	5	11	227	720	9	9	11	164	618	5	-18	11	559	824	5	-5	11	536	599	-5	5	11	738	973	-20	8	11	977	128	-2	-3	11	967	291	-2	-6
12	140	791	7	19	12	315	588	-3	2	12	768	381	7	5	12	228	720	10	9	12	164	618	5	-18	12	560	823	6	-6	12	536	598	-5	4	12	741	971	-17	6	12	977	128	-2	-3	12	967	291	-2	-6
13	144	792	11	20	13	315	588	-3	2	13	768	381	7	5	13	231	721	13	10	13	164	618	5	-18	13	561	822	7	-7	13	536	597	-5	3	13	739	971	-19	6	13	975	128	-4	-3	13	966	292	-3	-5
14	144	794	11	22	14	315	588	-3	2	14	768	379	7	3	14	236	723	18	12	14	163	613	4	-23	14	561	822	7	-7	14	536	596	-5	2	14	733	972	-25	7	14	973	128	-6	-3	14	966	292	-3	-5
15	144	794	11	22	15	315	587	-3	1	15	768	379	7	3	15	238	725	20	14	15	163	613	4	-23	15	563	822	9	-7	15	534	597	-7	3	15	735	969	-23	4	15	971	126	-8	-5	15	969	300	0	3
16	144	796	11	24	16	315	588	-3	2	16	768	379	7	3	16	239	725	21	14	16	163	615	4	-21	16	566	823	12	-6	16	534	595	-7	1	16	730	971	-28	6	16	970	127	-9	-4	16	970	300	1	3
17	144	796	11	24	17	316	586	-2	0	17	770	379	9	3	17	239	725	21	14	17	166	615	7	-21	17	567	823	13	-6	17	532	593	-9	-1	17	727	971	-31	6	17	968	126	-11	-5	17	970	300	1	3
18	144	796	11	24	18	318	583	0	-3	18	770	379	9	3	18	240	725	22	14	18	166	615	7	-21	18	568	823	14	-6	18	528	593	-13	-1	18	725	970	-33	5	18	966	125	-13	-6	18	970	300	1	3
19	144	788	11	16	19	320	578	2	-8	19	770	381	9	5	19	240	722	22	11	19	166	615	7	-21	19	569	823	15	-6	19	524	592	-17	-2	19	724	969	-34	4	19	966	122	-13	-9	19	969	300	0	3
20	143	797	10	25	20	323	574	5	-12	20	770	382	9	6	20	244	720	26	9	20	166	615	7	-21	20	570	822	16	-7	20	520	592	-21	-2	20	726	965	-32	0	20	963	123	-16	-8	20	969	301	0	4
21	142	802	9	30	21	324	572	6	-14	21	771	381	10	5	21	245	720	27	9	21	166	615	7	-21	21	572	823	18	-6	21	517	592	-24	-2	21	722	966	-36	1	21	962	124	-17	-7	21	969	302	0	5
22	142	802	9	30	22	326	569	8	-17	22	771	381	10	5	22	248	719	30	8	22	164	615	5	-21	22	573	823	19	-6	22	517	592	-24	-2	22	720	967	-38	2	22	960	124	-19	-7	22	969	302	0	5
23	142	802	9	30	23	329	567	11	-19	23	772	381	11	5	23	249	717	31	6	23	164	615	5	-21	23	574	823	20	-6	23	517	592	-24	-2	23	719	967	-39	2	23	959	124	-20	-7	23	969	302	0	5
24	142	802	9	30	24	331	566	13	-20	24	772	382	11	6	24	249	717	31	6	24	164	615	5	-21	24	574	824	20	-5	24	518	593	-23	-1	24	716	968	-42	3	24	957	125	-22	-6	24	967	302	-2	5
25	142	802	9	30	25	332	564	14	-22	25	772	383	11	7	25	250	717	32	6	25	164	615	5	-21	25	575	825	21	-4	25	518	594	-23	0	25	718	966	-40	1	25	956	125	-23	-6	25	967	302	-2	5
26	143	803	10	31	26	333	564	15	-22	26	772	384	11	8	26	251	717	33	6	26	164	613	5	-23	26	577	825	23	-4	26	515	596	-26	2	26	716	964	-42	-1	26	956	127	-23	-4	26	967	302	-2	5
27	144	803	11	31	27	333	563	15	-23	27	771	384	10	8	27	250	717	32	6	27	166	613	7	-23	27	577	826	23	-3	27	519	597	-22	3	27	715	964	-43	-1	27	955	123	-24	-8	27	967	302	-2	5
28	144	803	11	31	28	333	563	15	-23	28	771	384	10	8	28	250	719	32	8	28	167	613	8	-23	28	578	826	24	-3	28	519	598	-22	4	28	714	963	-44	-2	28	954	123	-25	-8	28	967	302	-2	5
29	153	805	20	33	29	333	562	15	-24	29	771	384	10	8	29	251	719	33	8	29	167	613	8	-23	29	578	828	24	-1	29	517	599	-24	5	29	713	963	-45	-2	29	952	122	-27	-9	29	970	302	1	5
30	153	806	20	34	30	333	562	15	-24	30	773	384	12	8	30	253	719	35	8	30	167	613	8	-23	30	578	829	24	0	30	517	598	-24	4	30	711	964	-47	-1	30	951	123	-28	-8	30	972	302	3	5
31	152	809	19	37	31	331	564	13	-22	31	777	384	16	8	31	254	719	36	8	31	167	613	8	-23	31	579	830	25	1	31	517	598	-24	4	31	708	968	-50	3	31	950	125	-29	-6	31	970	304	1	7
32	141	816	8	44	32	332	563	14	-23	32	778	382	17	6	32	255	719	37	8	32	167	613	8	-23	32	580	830	26	1	32	514	596	-27	2	32	709	961	-49	-4	32	949	124	-30	-7	32	970	304	1	7
33	130	830	-3	58	33	332	564	14	-22	33	779	382	18	6	33	257	720	39	9	33	168	613	9	-23	33	580	831	26	2	33	511	594	-30	0	33	707	961	-51	-4	33	947	124	-32	-7	33	970	305	1	8
34	126	838	-7	66	34	332	564	14	-22	34	779	381	18	5	34	260	720	42	9	34	168	613	9	-23	34	581	831	27	2	34	499	594	-42	0	34	705	961	-53	-4	34	945	124	-34	-7	34	961	311	-8	14
35	126	844	-7	72	35	332	564	14	-22	35	781	381	20	5	35	261	720	43	9	35	169	613	10	-23	35	580	832	26	3	35	504	594	-37	0	35	704	960	-54	-5	35	943	124	-36	-7	35	961	311	-8	14
36	108	849	-25	77	36	332	565	14	-21	36	781	381	20	5	36	261	720	43	9	36	164	613	5	-23	36	582	833	28	4	36	504	593	-37	-1	36	704	958	-54	-7	36	942	122	-37	-9	36	964	310	-5	13
37	107	851	-26	79	37	333	565	15	-21	37	784	381	23	5	37	259	723	41	12	37	164	615	5	-21	37	582	833	28	4	37	505	591	-36	-3	37	691	969	-67	4	37	941	121	-38	-10	37	964	308	-5	11
38	107	852	-26	80	38	335	564	17	-22	38	787	377	26	1	38	259	725	41	14	38	164	615	5	-21	38	582	834	28	5	38	506	588	-35	-6	38	690	967	-68	2	38	940	121	-39	-10	38	967	305	-2	8
39	103	856	-30	84	39	336	563	18	-23	39	788	376	27	0	39	259	727	41	16	39	164	615	5	-21	39	582	834	28	5	39	505	586	-36	-8	39	690	967	-68	2	39	937	121	-42	-10	39	967	304	-2	7
40	102	856	-31	84	40	336	563	18	-23	40	789	376	28	0	40	260	728	42	17	40	163	615	4	-21	40	581	835	27	6	40	503	588	-38	-6	40	690	963	-68	-2	40	936	120	-43	-11	40	967	304	-2	7
41	99	861	-34	89	41	337	564	19	-22	41	789	376	28	0	41	260	728	42	17	41	163	615	4	-21	41	583	835	29	6	41	501	589	-40	-5	41	688	965	-70	0	41	937	119	-42	-12	41	967	304	-2	7
42	97	862	-36	90	42	338	563	20	-23	42	789	376	28	0	42	257	732	39	21	42	163	615	4	-21	42	583	836	29	7	42	500	588	-41	-6	42	688	963	-70	-2	42	936	118	-43	-13	42	966	304	-3	7
43	95	868	-38	96	43	340	563	22	-23	43	791	376	30	0	43	253	736	35	25	43	163	613	4	-23	43	582	837	28	8	43	498	587	-43	-7	43	688	963	-70	-2	43	934	118	-45	-13	43	964	304	-5	7
44	95	873	-38	101	44	342	562	24	-24	44	792	376	31	0	44	250	740	32	29	44	163	613	4	-23	44	582	837	28	8	44	495	583	-46	-11	44	686	963	-72	-2	44	934	117	-45	-14	44	963	304	-6	7
45	95	875	-38	103	45	342	562	24	-24	45	793	376	32	0	45	253	750	35	39	45	164	613	5	-23	45	583	837	29	8	45	494	582	-47	-12	45	685	963	-73	-2	45	933	117	-46	-14	45	961	304	-8	7
46	99	877	-34	105	46	343	563	25	-23	46	796	376	35	0	46	253	751	35	40	46	164	613	5	-23	46	586	837	32	8	46	493	579	-48	-15	46	684	963	-74	-2	46	933	119	-46	-12	46	961	304	-8	7
47	109	876	-24	104	47	344	563	26	-23	47	797	376	36	0	47	253	754	35	43	47	164	615	5	-21	47	585	838	31	9	47	492	578	-49	-16	47	683	963	-75	-2	47	932	119	-47	-12	47	961	304	-8	7
48	107	871	-26	99	48	345	562	27	-24	48	798	376	37	0	48	254	749	36	38	48	164	616	5	-20	48	585	839	31	10	48	491	579	-50	-15	48	684	964	-74	-1	48	932	118	-47	-13	48	961	304	-8	7
49	102	871	-31	99	49	345	562	27	-24	49	798	376	37	0	49	256	748	38	37	49	164	616	5	-20	49	584	840	30	11	49	489	577	-52	-17	49	683	963	-75	-2	49	932	118	-47	-13	49	960	304	-9	7
50	101	872	-32	100	50	345	562	27	-24	50	798	376	37	0	50	260	746	42	35	50	164	616	5	-20	50	584	840	30	11	50	486	573	-55	-21	50	683	964	-75	-1	50	932	117	-47	-14	50	956	304	-13	7
51	101	872	-32	100	51	347	562	29	-24	51	798	376	37	0	51	262	744	44	33	51	164	616	5	-20	51	585	841	31	12	51	483	572	-58	-22	51	682	964	-76	-1	51	931	118	-48	-13	51	954	304	-15	7
52	97	873	-36	101	52	347	562	29	-24	52	802	373	41	-3	52	265	743	47	32	52	164	616	5	-20	52	584	841	30	12	52	480	569	-61	-25	52	681	964	-77	-1	52	930	119	-49	-12	52	954	304	-15	7
53	96	873	-37	101	53	346	562	28	-24	53	803	373	42	-3	53	265	742	47	31	53	164	616	5	-20	53	585	841	31	12	53	478	575	-63	-19	53	681	964	-77	-1	53	932	118	-47	-13	53	954	302	-15	5
54	96	870	-37	98	54	346	562	28	-24	54	802	373	41	-3	54	267	739	49	28	54	164	616	5	-20	54	583	841	29	12	54	478	575	-63	-19	54	681	963	-77	-2	54	930	120	-49	-11	54	953	301	-16	4
55	96	869	-37	97	55	346	562	28	-24	55	802	374	41	-2	55	268	738	50	27	55	164	616	5	-20	55	583	841	29	12	55	477	576	-64	-18	55	680	963	-78	-2	55	929	120	-50	-11	55	953	301	-16	4
56	100	869	-33	97	56	346	563	28	-23	56	802	374	41	-2	56	271	736	53	25	56	164	616	5	-20	56	585	842	31	13	56	476	577	-65	-17	56	679	962	-79	-3	56	929	118	-50	-13	56	953	301	-16	4
57	103	869	-30	97	57	345	563	27	-23	57	802	374	41	-2	57	272	734	54	23	57	170	619	11	-17	57	584	843	30	14	57	475	578	-66	-16	57	678	962	-80	-3	57	929	118	-50	-13	57	953	301	-16	4
58	103	866	-30	94	58	345	564	27	-22	58	802	374	41	-2	58	274	733	56	22	58	164	619	5	-17	58	584	843	30	14	58	475	579	-66	-15	58	679	964	-79	-1	58	929	118	-50	-13	58	953	301	-16	4
59	103	863	-30	91	59	345	564	27	-22	59	802	374	41	-2	59	267	739	49	28	59	164	622	5	-14	59	583	844	29	15	59	475	578	-66	-16	59	679	965	-79	0	59	929	118	-50	-13	59	954	301	-15	4
60	101	863	-32	91	60	346	565	28	-21	60	802	376	41	0	60	271	740	53	29	60	166	622	7	-14	60	583	844	29	15	60	474	577	-67	-17	60	679	964	-79	-1	60	929	118	-50	-13	60	957	301	-12	4
61	101	863	-32	91	61	348	566	30	-20	61	802	376	41	0	61	271	740	53	29	61	166	622	7	-14	61	584	845	30	16	61	474	575	-67	-19	61	678	962	-80	-3	61	929	116	-50	-15	61	959	301	-10	4
62	101	863	-32	91	62	349	566	31	-20	62	802	376	41	0	62	277	740	59	29	62	166	622	7	-14	62	583	846	29	17	62	474	575	-67	-19	62	677	961	-81	-4	62	928	115	-51	-16	62	959	301	-10	4
63	97	863	-36	91	63	350	566	32	-20	63	800	373	39	-3	63	278	740	60	29	63	166	622	7	-14	63	583	846	29	17	63	473	576	-68	-18	63	677	962	-81	-3	63	927	116	-52	-15	63	957	301	-12	4
64	102	861	-31	89	64	348	567	30	-19	64	799	372	38	-4	64	278	738	60	27	64	166	621	7	-15	64	582	846	28	17	64	473	576	-68	-18	64	677	961	-81	-4	64	927	115	-52	-16	64	957	301	-12	4
65	105	858	-28	86	65	348	568	30	-18	65	798	371	37	-5	65	277	736	59	25	65	167	621	8	-15	65	581	847	27	18	65	473	576	-68	-18	65	677	961	-81	-4	65	927	115	-52	-16	65	956	301	-13	4
66	105	856	-28	84	66	350	569	32	-17	66	796	369	35	-7	66	277	736	59	25	66	167	621	8	-15	66	580	850	26	21	66	473	575	-68	-19	66	676	959	-82	-6	66	928	112	-51	-19	66	951	300	-18	3
67	105	858	-28	86	67	351	569	33	-17	67	791	371	30	-5	67	277	736	59	25	67	166	619	7	-17	67	580	850	26	21	67	473	576	-68	-18	67	676	958	-82	-7	67	928	112	-51	-19	67	950	300	-19	3
68	106	862	-27	90	68	352	569	34	-17	68	789	372	28	-4	68	277	737	59	26	68	164	619	5	-17	68	581	849	27	20	68	472	577	-69	-17	68	675	958	-83	-7	68	929	111	-50	-20	68	950	300	-19	3
69	108	862	-25	90	69	354	569	36	-17	69	788	373	27	-3	69	279	737	61	26	69	164	619	5	-17	69	581	849	27	20	69	472	577	-69	-17	69	676	957	-82	-8	69	928	111	-51	-20	69	954	300	-15	3
70	108	862	-25	90	70	357	568	39	-18	70	791	371	30	-5	70	282	736	64	25	70	164	619	5	-17	70	580	849	26	20	70	472	574	-69	-20	70	676	960	-82	-5	70	927	112	-52	-19	70	951	302	-18	5
71	108	862	-25	90	71	359	567	41	-19	71	791	371	30	-5	71	284	734	66	23	71	164	619	5	-17	71	580	850	26	21	71	472	574	-69	-20	71	675	959	-83	-6	71	930	111	-49	-20	71	945	304	-24	7
72	108	862	-25	90	72	359	567	41	-19	72	791	371	30	-5	72	288	732	70	21	72	164	619	5	-17	72	580	850	26	21	72	472	575	-69	-19	72	675	958	-83	-7	72	929	112	-50	-19	72	945	304	-24	7
73	108	862	-25	90	73	359	567	41	-19	73	787	372	26	-4	73	289	732	71	21	73	168	619	9	-17	73	579	851	25	22	73	473	574	-68	-20	73	675	958	-83	-7	73	929	112	-50	-19	73	944	304	-25	7
74	108	862	-25	90	74	359	567	41	-19	74	783	373	22	-3	74	291	731	73	20	74	168	619	9	-17	74	579	851	25	22	74	472	574	-69	-20	74	674	957	-84	-8	74	929	112	-50	-19	74	943	304	-26	7
75	110	861	-23	89	75	360	567	42	-19	75	789	376	28	0	75	311	732	93	21	75	168	619	9	-17	75	578	852	24	23	75	472	577	-69	-17	75	674	956	-84	-9	75	928	111	-51	-20	75	941	304	-28	7
76	110	861	-23	89	76	362	567	44	-19	76	791	374	30	-2	76	300	736	82	25	76	167	619	8	-17	76	577	854	23	25	76	473	577	-68	-17	76	672	954	-86	-11	76	930	113	-49	-18	76	938	304	-31	7
77	110	859	-23	87	77	362	568	44	-18	77	791	372	30	-4	77	299	737	81	26	77	168	619	9	-17	77	576	854	22	25	77	473	576	-68	-18	77	674	957	-84	-8	77	932	109	-47	-22	77	938	304	-31	7
78	110	859	-23	87	78	363	569	45	-17	78	791	371	30	-5	78	299	737	81	26	78	168	622	9	-14	78	576	854	22	25	78	473	577	-68	-17	78	674	957	-84	-8	78	930	112	-49	-19	78	935	304	-34	7
79	110	859	-23	87	79	364	569	46	-17	79	791	374	30	-2	79	299	737	81	26	79	168	623	9	-13	79	575	855	21	26	79	473	577	-68	-17	79	674	957	-84	-8	79	929	107	-50	-24	79	934	304	-35	7
80	109	862	-24	90	80	365	569	47	-17	80	791	377	30	1	80	300	733	82	22	80	166	624	7	-12	80	574	856	20	27	80	472	577	-69	-17	80	673	956	-85	-9	80	929	106	-50	-25	80	934	304	-35	7
81	109	864	-24	92	81	368	569	50	-17	81	789	378	28	2	81	302	732	84	21	81	163	627	4	-9	81	572	859	18	30	81	470	579	-71	-15	81	673	954	-85	-11	81	930	105	-49	-26	81	934	304	-35	7
82	112	870	-21	98	82	370	569	52	-17	82	789	378	28	2	82	305	732	87	21	82	163	630	4	-6	82	571	860	17	31	82	471	576	-70	-18	82	672	955	-86	-10	82	928	105	-51	-26	82	934	304	-35	7
83	116	876	-17	104	83	371	569	53	-17	83	788	378	27	2	83	306	732	88	21	83	166	632	7	-4	83	570	861	16	32	83	470	578	-71	-16	83	671	952	-87	-13	83	928	106	-51	-25	83	931	304	-38	7
84	119	876	-14	104	84	371	570	53	-16	84	787	381	26	5	84	305	732	87	21	84	167	633	8	-3	84	568	863	14	34	84	470	576	-71	-18	84	670	952	-88	-13	84	926	107	-53	-24	84	931	304	-38	7
85	119	876	-14	104	85	372	570	54	-16	85	786	383	25	7	85	303	733	85	22	85	166	635	7	-1	85	569	862	15	33	85	469	578	-72	-16	85	670	953	-88	-12	85	923	105	-56	-26	85	931	305	-38	8
86	120	878	-13	106	86	375	570	57	-16	86	786	383	25	7	86	305	733	87	22	86	166	634	7	-2	86	568	865	14	36	86	468	580	-73	-14	86	668	952	-90	-13	86	924	103	-55	-28	86	931	307	-38	10
87	121	882	-12	110	87	375	571	57	-15	87	786	383	25	7	87	306	733	88	22	87	166	633	7	-3	87	568	865	14	36	87	467	580	-74	-14	87	667	952	-91	-13	87	924	103	-55	-28	87	931	307	-38	10
88	126	892	-7	120	88	375	571	57	-15	88	786	382	25	6	88	308	734	90	23	88	166	633	7	-3	88	568	866	14	37	88	466	580	-75	-14	88	667	951	-91	-14	88	920	103	-59	-28	88	929	307	-40	10
89	134	903	1	131	89	374	572	56	-14	89	786	382	25	6	89	309	739	91	28	89	164	632	5	-4	89	568	867	14	38	89	466	579	-75	-15	89	666	951	-92	-14	89	923	102	-56	-29	89	929	307	-40	10
90	137	903	4	131	90	375	571	57	-15	90	786	383	25	7	90	313	733	95	22	90	164	632	5	-4	90	568	867	14	38	90	466	575	-75	-19	90	665	950	-93	-15	90	918	103	-61	-28	90	929	307	-40	10
91	141	903	8	131	91	376	570	58	-16	91	786	385	25	9	91	313	732	95	21	91	164	632	5	-4	91	567	869	13	40	91	465	575	-76	-19	91	666	948	-92	-17	91	921	101	-58	-30	91	929	308	-40	11
92	141	905	8	133	92	376	570	58	-16	92	788	385	27	9	92	314	731	96	20	92	166	632	7	-4	92	566	869	12	40	92	465	575	-76	-19	92	665	947	-93	-18	92	918	101	-61	-30	92	928	308	-41	11
93	144	904	11	132	93	375	570	57	-16	93	791	385	30	9	93	314	730	96	19	93	167	632	8	-4	93	566	869	12	40	93	464	576	-77	-18	93	665	946	-93	-19	93	918	100	-61	-31	93	931	311	-38	14
94	159	905	26	133	94	375	569	57	-17	94	791	385	30	9	94	315	728	97	17	94	164	635	5	-1	94	566	868	12	39	94	464	576	-77	-18	94	664	945	-94	-20	94	918	100	-61	-31	94	934	313	-35	16
95	161	915	28	143	95	376	568	58	-18	95	791	385	30	9	95	318	723	100	12	95	163	634	4	-2	95	566	869	12	40	95	463	577	-78	-17	95	662	945	-96	-20	95	916	102	-63	-29	95	937	313	-32	16
96	156	925	23	153	96	378	567	60	-19	96	792	384	31	8	96	318	716	100	5	96	163	634	4	-2	96	566	871	12	42	96	463	575	-78	-19	96	662	944	-96	-21	96	916	102	-63	-29	96	940	314	-29	17
97	143	926	10	154	97	378	565	60	-21	97	792	379	31	3	97	320	710	102	-1	97	163	634	4	-2	97	567	871	13	42	97	462	574	-79	-20	97	662	942	-96	-23	97	915	102	-64	-29	97	943	314	-26	17
98	143	926	10	154	98	379	565	61	-21	98	791	379	30	3	98	326	697	108	-14	98	163	634	4	-2	98	567	872	13	43	98	462	572	-79	-22	98	661	941	-97	-24	98	913	103	-66	-28	98	948	315	-21	18
99	154	926	21	154	99	381	564	63	-22	99	788	383	27	7	99	330	691	112	-20	99	163	634	4	-2	99	568	871	14	42	99	462	571	-79	-23	99	660	942	-98	-23	99	914	101	-65	-30	99	950	315	-19	18
100	154	926	21	154	100	383	563	65	-23	100	788	383	27	7	100	337	690	119	-21	100	163	635	4	-1	100	568	871	14	42	100	462	570	-79	-24	100	659	940	-99	-25	100	910	103	-69	-28	100	951	315	-18	18
101	152	926	19	154	101	385	562	67	-24	101	782	385	21	9	101	342	686	124	-25	101	163	636	4	0	101	568	872	14	43	101	462	571	-79	-23	101	659	938	-99	-27	101	912	103	-67	-28	101	954	315	-15	18
102	150	926	17	154	102	390	561	72	-25	102	783	387	22	11	102	344	681	126	-30	102	163	638	4	2	102	569	872	15	43	102	461	570	-80	-24	102	659	938	-99	-27	102	912	103	-67	-28	102	957	315	-12	18
103	152	926	19	154	103	392	561	74	-25	103	784	383	23	7	103	348	679	130	-32	103	157	635	-2	-1	103	569	872	15	43	103	461	569	-80	-25	103	658	937	-100	-28	103	909	105	-70	-26	103	959	317	-10	20
104	150	936	17	164	104	393	560	75	-26	104	784	383	23	7	104	349	678	131	-33	104	158	635	-1	-1	104	570	872	16	43	104	460	569	-81	-25	104	657	938	-101	-27	104	910	103	-69	-28	104	963	317	-6	20
105	150	943	17	171	105	395	559	77	-27	105	784	383	23	7	105	349	678	131	-33	105	161	636	2	0	105	570	872	16	43	105	460	568	-81	-26	105	657	937	-101	-28	105	910	103	-69	-28	105	963	317	-6	20
106	150	946	17	174	106	396	559	78	-27	106	786	383	25	7	106	347	682	129	-29	106	159	638	0	2	106	570	874	16	45	106	459	568	-82	-26	106	656	935	-102	-30	106	909	105	-70	-26	106	963	318	-6	21
107	150	949	17	177	107	400	558	82	-28	107	786	388	25	12	107	349	684	131	-27	107	158	638	-1	2	107	570	874	16	45	107	458	568	-83	-26	107	657	934	-101	-31	107	910	104	-69	-27	107	959	320	-10	23
108	153	950	20	178	108	401	558	83	-28	108	788	392	27	16	108	355	684	137	-27	108	158	638	-1	2	108	570	874	16	45	108	457	568	-84	-26	108	656	934	-102	-31	108	909	104	-70	-27	108	957	323	-12	26
109	159	953	26	181	109	403	558	85	-28	109	789	392	28	16	109	357	684	139	-27	109	158	640	-1	4	109	570	874	16	45	109	457	566	-84	-28	109	655	934	-103	-31	109	908	104	-71	-27	109	956	326	-13	29
110	159	955	26	183	110	405	557	87	-29	110	789	390	28	14	110	359	684	141	-27	110	161	642	2	6	110	570	874	16	45	110	456	567	-85	-27	110	655	934	-103	-31	110	909	102	-70	-29	110	954	326	-15	29
111	159	957	26	185	111	407	558	89	-28	111	787	389	26	13	111	360	686	142	-25	111	159	642	0	6	111	569	876	15	47	111	456	567	-85	-27	111	654	936	-104	-29	111	908	104	-71	-27	111	954	327	-15	30
112	159	959	26	187	112	409	557	91	-29	112	787	388	26	12	112	360	686	142	-25	112	157	642	-2	6	112	569	875	15	46	112	456	566	-85	-28	112	654	935	-104	-30	112	908	104	-71	-27	112	951	330	-18	33
113	166	960	33	188	113	411	558	93	-28	113	787	388	26	12	113	364	686	146	-25	113	157	642	-2	6	113	567	875	13	46	113	455	567	-86	-27	113	654	934	-104	-31	113	908	103	-71	-28	113	950	330	-19	33
114	168	959	35	187	114	414	557	96	-29	114	784	387	23	11	114	348	688	130	-23	114	156	642	-3	6	114	568	875	14	46	114	455	566	-86	-28	114	653	934	-105	-31	114	908	102	-71	-29	114	948	330	-21	33
115	168	956	35	184	115	415	557	97	-29	115	784	387	23	11	115	348	690	130	-21	115	156	642	-3	6	115	568	875	14	46	115	455	565	-86	-29	115	653	934	-105	-31	115	908	102	-71	-29	115	948	330	-21	33
116	168	957	35	185	116	417	558	99	-28	116	786	387	25	11	116	350	690	132	-21	116	156	642	-3	6	116	568	877	14	48	116	455	565	-86	-29	116	651	933	-107	-32	116	906	102	-73	-29	116	947	330	-22	33
117	171	959	38	187	117	418	558	100	-28	117	787	384	26	8	117	355	699	137	-12	117	152	644	-7	8	117	568	876	14	47	117	455	565	-86	-29	117	651	933	-107	-32	117	905	102	-74	-29	117	945	330	-24	33
118	174	959	41	187	118	418	559	100	-27	118	791	383	30	7	118	355	705	137	-6	118	152	647	-7	11	118	551	851	-3	22	118	454	565	-87	-29	118	650	932	-108	-33	118	904	102	-75	-29	118	945	330	-24	33
119	174	959	41	187	119	417	560	99	-26	119	791	382	30	6	119	353	711	135	0	119	152	649	-7	13	119	550	850	-4	21	119	453	566	-88	-28	119	650	932	-108	-33	119	904	102	-75	-29	119	945	330	-24	33
120	174	958	41	186	120	418	561	100	-25	120	786	384	25	8	120	349	716	131	5	120	152	649	-7	13	120	550	850	-4	21	120	454	567	-87	-27	120	651	932	-107	-33	120	904	102	-75	-29	120	944	330	-25	33
121	174	958	41	186	121	420	561	102	-25	121	787	383	26	7	121	348	719	130	8	121	152	650	-7	14	121	549	851	-5	22	121	455	568	-86	-26	121	649	931	-109	-34	121	901	104	-78	-27	121	943	331	-26	34
122	174	958	41	186	122	421	562	103	-24	122	787	381	26	5	122	354	721	136	10	122	151	651	-8	15	122	549	851	-5	22	122	455	569	-86	-25	122	649	932	-109	-33	122	904	103	-75	-28	122	940	333	-29	36
123	174	959	41	187	123	420	562	102	-24	123	787	379	26	3	123	354	722	136	11	123	151	653	-8	17	123	549	851	-5	22	123	456	570	-85	-24	123	650	931	-108	-34	123	904	102	-75	-29	123	937	334	-32	37
124	174	963	41	191	124	419	562	101	-24	124	786	378	25	2	124	354	716	136	5	124	151	655	-8	19	124	548	852	-6	23	124	456	571	-85	-23	124	651	931	-107	-34	124	905	102	-74	-29	124	935	334	-34	37
125	174	973	41	201	125	419	563	101	-23	125	786	378	25	2	125	354	717	136	6	125	130	663	-29	27	125	548	853	-6	24	125	456	571	-85	-23	125	649	931	-109	-34	125	903	103	-76	-28	125	931	334	-38	37
126	169	979	36	207	126	421	563	103	-23	126	786	378	25	2	126	354	719	136	8	126	130	661	-29	25	126	549	854	-5	25	126	456	571	-85	-23	126	645	934	-113	-31	126	899	105	-80	-26	126	928	336	-41	39
127	159	979	26	207	127	422	563	104	-23	127	786	378	25	2	127	353	721	135	10	127	132	657	-27	21	127	550	854	-4	25	127	457	571	-84	-23	127	647	931	-111	-34	127	900	104	-79	-27	127	927	336	-42	39
128	159	983	26	211	128	422	563	104	-23	128	787	381	26	5	128	350	722	132	11	128	133	662	-26	26	128	550	854	-4	25	128	457	574	-84	-20	128	647	930	-111	-35	128	900	104	-79	-27	128	927	337	-42	40
129	154	986	21	214	129	423	563	105	-23	129	787	383	26	7	129	349	723	131	12	129	138	658	-21	22	129	550	855	-4	26	129	458	574	-83	-20	129	648	930	-110	-35	129	901	104	-78	-27	129	927	337	-42	40
130	148	990	15	218	130	423	563	105	-23	130	787	383	26	7	130	352	725	134	14	130	143	668	-16	32	130	550	856	-4	27	130	459	575	-82	-19	130	642	934	-116	-31	130	897	105	-82	-26	130	924	339	-45	42
131	135	992	2	220	131	422	564	104	-22	131	788	378	27	2	131	355	725	137	14	131	143	669	-16	33	131	550	859	-4	30	131	460	575	-81	-19	131	639	934	-119	-31	131	898	105	-81	-26	131	924	339	-45	42
132	132	994	-1	222	132	422	564	104	-22	132	788	378	27	2	132	357	725	139	14	132	149	671	-10	35	132	551	858	-3	29	132	460	574	-81	-20	132	640	934	-118	-31	132	897	105	-82	-26	132	924	339	-45	42
133	128	997	-5	225	133	425	565	107	-21	133	787	374	26	-2	133	359	725	141	14	133	145	669	-14	33	133	552	858	-2	29	133	459	575	-82	-19	133	639	934	-119	-31	133	897	105	-82	-26	133	924	339	-45	42
134	123	996	-10	224	134	425	566	107	-20	134	787	373	26	-3	134	361	726	143	15	134	146	669	-13	33	134	552	858	-2	29	134	461	574	-80	-20	134	640	934	-118	-31	134	896	105	-83	-26	134	924	339	-45	42
135	123	993	-10	221	135	425	567	107	-19	135	789	372	28	-4	135	365	726	147	15	135	141	669	-18	33	135	551	858	-3	29	135	461	574	-80	-20	135	640	934	-118	-31	135	895	106	-84	-25	135	927	337	-42	40
136	123	993	-10	221	136	427	568	109	-18	136	793	371	32	-5	136	365	726	147	15	136	137	669	-22	33	136	554	856	0	27	136	462	575	-79	-19	136	639	933	-119	-32	136	896	106	-83	-25	136	927	337	-42	40
137	120	996	-13	224	137	427	568	109	-18	137	793	368	32	-8	137	364	727	146	16	137	134	670	-25	34	137	555	854	1	25	137	463	575	-78	-19	137	640	932	-118	-33	137	896	105	-83	-26	137	927	337	-42	40
138	123	998	-10	226	138	422	568	104	-18	138	793	365	32	-11	138	364	730	146	19	138	135	671	-24	35	138	554	853	0	24	138	463	576	-78	-18	138	638	932	-120	-33	138	893	106	-86	-25	138	925	337	-44	40
139	127	998	-6	226	139	421	570	103	-16	139	794	362	33	-14	139	364	731	146	20	139	139	673	-20	37	139	552	853	-2	24	139	463	575	-78	-19	139	638	932	-120	-33	139	894	106	-85	-25	139	925	339	-44	42
140	127	997	-6	225	140	421	569	103	-17	140	794	361	33	-15	140	367	731	149	20	140	145	673	-14	37	140	553	853	-1	24	140	462	575	-79	-19	140	639	932	-119	-33	140	893	106	-86	-25	140	925	339	-44	42
141	127	997	-6	225	141	420	570	102	-16	141	794	361	33	-15	141	371	731	153	20	141	143	669	-16	33	141	551	854	-3	25	141	461	575	-80	-19	141	638	933	-120	-32	141	892	107	-87	-24	141	924	339	-45	42
142	127	997	-6	225	142	420	571	102	-15	142	794	361	33	-15	142	371	731	153	20	142	143	665	-16	29	142	551	853	-3	24	142	460	574	-81	-20	142	638	933	-120	-32	142	892	108	-87	-23	142	919	340	-50	43
143	128	997	-5	225	143	420	571	102	-15	143	794	360	33	-16	143	373	731	155	20	143	143	663	-16	27	143	550	853	-4	24	143	459	573	-82	-21	143	639	933	-119	-32	143	892	108	-87	-23	143	922	340	-47	43
144	135	999	2	227	144	422	572	104	-14	144	794	357	33	-19	144	375	730	157	19	144	134	665	-25	29	144	548	852	-6	23	144	458	573	-83	-21	144	639	933	-119	-32	144	892	108	-87	-23	144	918	336	-51	39
145	142	999	9	227	145	422	573	104	-13	145	794	357	33	-19	145	375	730	157	19	145	130	667	-29	31	145	546	850	-8	21	145	457	573	-84	-21	145	638	933	-120	-32	145	891	109	-88	-22	145	918	336	-51	39
146	144	999	11	227	146	422	573	104	-13	146	794	356	33	-20	146	377	730	159	19	146	132	664	-27	28	146	546	850	-8	21	146	458	571	-83	-23	146	636	935	-122	-30	146	892	108	-87	-23	146	918	334	-51	37
147	146	998	13	226	147	423	574	105	-12	147	794	353	33	-23	147	382	736	164	25	147	134	665	-25	29	147	546	849	-8	20	147	458	571	-83	-23	147	637	933	-121	-32	147	892	108	-87	-23	147	918	334	-51	37
148	140	996	7	224	148	423	575	105	-11	148	794	351	33	-25	148	386	733	168	22	148	135	669	-24	33	148	546	849	-8	20	148	457	572	-84	-22	148	636	935	-122	-30	148	892	108	-87	-23	148	919	334	-50	37
149	137	996	4	224	149	423	576	105	-10	149	796	349	35	-27	149	387	733	169	22	149	138	669	-21	33	149	545	849	-9	20	149	457	577	-84	-17	149	636	935	-122	-30	149	891	109	-88	-22	149	918	337	-51	40
150	135	996	2	224	150	421	576	103	-10	150	796	345	35	-31	150	389	733	171	22	150	138	670	-21	34	150	544	849	-10	20	150	456	576	-85	-18	150	638	934	-120	-31	150	891	110	-88	-21	150	918	337	-51	40
151	134	994	1	222	151	419	577	101	-9	151	796	345	35	-31	151	399	733	181	22	151	138	664	-21	28	151	543	850	-11	21	151	457	573	-84	-21	151	635	937	-123	-28	151	890	111	-89	-20	151	915	337	-54	40
152	135	993	2	221	152	418	579	100	-7	152	796	344	35	-32	152	399	733	181	22	152	138	662	-21	26	152	543	848	-11	19	152	456	573	-85	-21	152	635	937	-123	-28	152	890	110	-89	-21	152	914	337	-55	40
153	137	993	4	221	153	416	579	98	-7	153	796	342	35	-34	153	399	728	181	17	153	135	658	-24	22	153	543	847	-11	18	153	455	572	-86	-22	153	638	934	-120	-31	153	890	110	-89	-21	153	914	336	-55	39
154	137	994	4	222	154	415	580	97	-6	154	796	341	35	-35	154	400	728	182	17	154	137	655	-22	19	154	537	839	-17	10	154	456	571	-85	-23	154	636	936	-122	-29	154	889	111	-90	-20	154	916	336	-53	39
155	137	996	4	224	155	414	580	96	-6	155	796	341	35	-35	155	400	733	182	22	155	138	655	-21	19	155	531	838	-23	9	155	457	572	-84	-22	155	635	935	-123	-30	155	888	111	-91	-20	155	918	336	-51	39
156	140	996	7	224	156	413	580	95	-6	156	797	337	36	-39	156	402	734	184	23	156	143	659	-16	23	156	529	838	-25	9	156	457	571	-84	-23	156	633	936	-125	-29	156	888	112	-91	-19	156	918	336	-51	39
157	140	996	7	224	157	412	580	94	-6	157	797	336	36	-40	157	404	734	186	23	157	145	664	-14	28	157	532	837	-22	8	157	458	571	-83	-23	157	635	934	-123	-31	157	887	112	-92	-19	157	918	334	-51	37
158	139	996	6	224	158	412	580	94	-6	158	798	334	37	-42	158	404	736	186	25	158	146	664	-13	28	158	530	835	-24	6	158	457	571	-84	-23	158	632	936	-126	-29	158	887	111	-92	-20	158	918	333	-51	36
159	139	996	6	224	159	410	580	92	-6	159	796	333	35	-43	159	404	737	186	26	159	141	665	-18	29	159	529	834	-25	5	159	458	569	-83	-25	159	631	936	-127	-29	159	886	112	-93	-19	159	915	333	-54	36
160	137	996	4	224	160	409	581	91	-5	160	791	331	30	-45	160	401	738	183	27	160	143	663	-16	27	160	527	834	-27	5	160	458	570	-83	-24	160	631	936	-127	-29	160	885	112	-94	-19	160	912	336	-57	39
161	136	996	3	224	161	407	582	89	-4	161	783	328	22	-48	161	401	738	183	27	161	145	663	-14	27	161	527	834	-27	5	161	459	567	-82	-27	161	628	937	-130	-28	161	884	112	-95	-19	161	909	337	-60	40
162	137	992	4	220	162	406	583	88	-3	162	782	328	21	-48	162	401	738	183	27	162	145	664	-14	28	162	526	834	-28	5	162	459	567	-82	-27	162	629	937	-129	-28	162	885	112	-94	-19	162	909	337	-60	40
163	136	991	3	219	163	404	585	86	-1	163	782	328	21	-48	163	404	736	186	25	163	144	664	-15	28	163	525	833	-29	4	163	458	566	-83	-28	163	629	937	-129	-28	163	884	112	-95	-19	163	909	337	-60	40
164	139	991	6	219	164	404	585	86	-1	164	782	329	21	-47	164	405	732	187	21	164	139	663	-20	27	164	522	833	-32	4	164	458	566	-83	-28	164	630	937	-128	-28	164	885	111	-94	-20	164	909	337	-60	40
165	139	991	6	219	165	403	586	85	0	165	783	331	22	-45	165	407	730	189	19	165	139	663	-20	27	165	516	832	-38	3	165	458	566	-83	-28	165	631	936	-127	-29	165	884	113	-95	-18	165	908	337	-61	40
166	139	991	6	219	166	403	588	85	2	166	786	330	25	-46	166	409	727	191	16	166	137	665	-22	29	166	516	833	-38	4	166	458	565	-83	-29	166	629	936	-129	-29	166	883	113	-96	-18	166	902	337	-67	40
167	139	991	6	219	167	402	589	84	3	167	786	329	25	-47	167	409	727	191	16	167	138	668	-21	32	167	514	832	-40	3	167	458	565	-83	-29	167	630	936	-128	-29	167	884	111	-95	-20	167	902	337	-67	40
168	139	991	6	219	168	401	590	83	4	168	784	329	23	-47	168	409	727	191	16	168	138	668	-21	32	168	513	831	-41	2	168	458	565	-83	-29	168	630	935	-128	-30	168	883	112	-96	-19	168	903	336	-66	39
169	137	990	4	218	169	400	591	82	5	169	781	325	20	-51	169	405	727	187	16	169	138	669	-21	33	169	511	831	-43	2	169	458	565	-83	-29	169	630	936	-128	-29	169	883	112	-96	-19	169	903	336	-66	39
170	137	990	4	218	170	399	592	81	6	170	781	325	20	-51	170	404	727	186	16	170	135	667	-24	31	170	510	830	-44	1	170	457	565	-84	-29	170	629	937	-129	-28	170	882	114	-97	-17	170	900	336	-69	39
171	137	990	4	218	171	398	594	80	8	171	781	325	20	-51	171	404	727	186	16	171	138	665	-21	29	171	511	831	-43	2	171	457	565	-84	-29	171	628	938	-130	-27	171	880	114	-99	-17	171	898	336	-71	39
172	137	990	4	218	172	396	594	78	8	172	778	325	17	-51	172	404	727	186	16	172	140	664	-19	28	172	509	830	-45	1	172	457	565	-84	-29	172	628	938	-130	-27	172	876	114	-103	-17	172	898	336	-71	39
173	137	990	4	218	173	394	594	76	8	173	773	324	12	-52	173	404	725	186	14	173	141	662	-18	26	173	506	829	-48	0	173	457	565	-84	-29	173	627	938	-131	-27	173	875	113	-104	-18	173	898	336	-71	39
174	134	991	1	219	174	393	595	75	9	174	773	325	12	-51	174	405	725	187	14	174	143	658	-16	22	174	506	829	-48	0	174	457	564	-84	-30	174	627	937	-131	-28	174	873	113	-106	-18	174	898	336	-71	39
175	132	992	-1	220	175	391	596	73	10	175	772	326	11	-50	175	405	725	187	14	175	143	656	-16	20	175	502	828	-52	-1	175	457	562	-84	-32	175	626	937	-132	-28	175	872	112	-107	-19	175	896	336	-73	39
176	130	992	-3	220	176	390	598	72	12	176	770	326	9	-50	176	405	723	187	12	176	145	656	-14	20	176	503	828	-51	-1	176	457	561	-84	-33	176	625	938	-133	-27	176	871	112	-108	-19	176	895	336	-74	39
177	130	992	-3	220	177	390	598	72	12	177	770	326	9	-50	177	409	720	191	9	177	149	657	-10	21	177	502	828	-52	-1	177	456	560	-85	-34	177	625	938	-133	-27	177	870	113	-109	-18	177	893	336	-76	39
178	129	992	-4	220	178	389	599	71	13	178	771	326	10	-50	178	411	716	193	5	178	143	658	-16	22	178	501	827	-53	-2	178	457	559	-84	-35	178	624	937	-134	-28	178	869	112	-110	-19	178	893	334	-76	37
179	129	992	-4	220	179	389	599	71	13	179	772	326	11	-50	179	411	716	193	5	179	143	659	-16	23	179	500	827	-54	-2	179	458	560	-83	-34	179	624	937	-134	-28	179	868	111	-111	-20	179	895	331	-74	34
180	127	989	-6	217	180	387	600	69	14	180	772	325	11	-51	180	411	715	193	4	180	140	659	-19	23	180	499	827	-55	-2	180	459	559	-82	-35	180	625	937	-133	-28	180	867	110	-112	-21	180	898	327	-71	30
181	127	987	-6	215	181	386	601	68	15	181	772	321	11	-55	181	413	713	195	2	181	139	661	-20	25	181	499	828	-55	-1	181	459	559	-82	-35	181	624	938	-134	-27	181	867	110	-112	-21	181	899	324	-70	27
182	127	987	-6	215	182	385	600	67	14	182	772	320	11	-56	182	413	709	195	-2	182	139	663	-20	27	182	498	827	-56	-2	182	458	559	-83	-35	182	624	937	-134	-28	182	867	109	-112	-22	182	899	323	-70	26
183	126	987	-7	215	183	383	600	65	14	183	768	318	7	-58	183	413	705	195	-6	183	139	664	-20	28	183	497	827	-57	-2	183	460	557	-81	-37	183	622	937	-136	-28	183	865	108	-114	-23	183	902	321	-67	24
184	126	990	-7	218	184	382	600	64	14	184	768	315	7	-61	184	409	699	191	-12	184	138	664	-21	28	184	495	826	-59	-3	184	459	557	-82	-37	184	619	936	-139	-29	184	862	108	-117	-23	184	902	321	-67	24
185	121	991	-12	219	185	380	599	62	13	185	768	314	7	-62	185	407	698	189	-13	185	139	662	-20	26	185	493	826	-61	-3	185	460	554	-81	-40	185	621	936	-137	-29	185	855	107	-124	-24	185	902	323	-67	26
186	120	990	-13	218	186	379	600	61	14	186	770	313	9	-63	186	405	694	187	-17	186	140	662	-19	26	186	492	827	-62	-2	186	461	552	-80	-42	186	616	936	-142	-29	186	852	108	-127	-23	186	900	323	-69	26
187	119	987	-14	215	187	377	599	59	13	187	781	302	20	-74	187	404	693	186	-18	187	141	662	-18	26	187	492	826	-62	-3	187	462	552	-79	-42	187	607	943	-151	-22	187	848	107	-131	-24	187	895	323	-74	26
188	119	986	-14	214	188	376	599	58	13	188	781	298	20	-78	188	402	690	184	-21	188	134	662	-25	26	188	490	826	-64	-3	188	462	552	-79	-42	188	605	942	-153	-23	188	845	107	-134	-24	188	896	323	-73	26
189	117	986	-16	214	189	375	598	57	12	189	782	298	21	-78	189	401	690	183	-21	189	133	662	-26	26	189	490	825	-64	-4	189	461	551	-80	-43	189	602	943	-156	-22	189	842	106	-137	-25	189	902	327	-67	30
190	115	986	-18	214	190	374	598	56	12	190	786	294	25	-82	190	401	688	183	-23	190	130	661	-29	25	190	488	825	-66	-4	190	458	550	-83	-44	190	601	942	-157	-23	190	835	111	-144	-20	190	903	327	-66	30
191	114	986	-19	214	191	373	599	55	13	191	792	293	31	-83	191	401	687	183	-24	191	129	659	-30	23	191	488	826	-66	-3	191	460	551	-81	-43	191	599	942	-159	-23	191	836	110	-143	-21	191	902	327	-67	30
192	110	983	-23	211	192	372	598	54	12	192	809	301	48	-75	192	402	685	184	-26	192	129	658	-30	22	192	485	825	-69	-4	192	460	550	-81	-44	192	599	942	-159	-23	192	832	110	-147	-21	192	899	329	-70	32
193	110	984	-23	212	193	371	598	53	12	193	814	304	53	-72	193	402	684	184	-27	193	129	658	-30	22	193	484	825	-70	-4	193	460	550	-81	-44	193	588	949	-170	-16	193	829	109	-150	-22	193	899	330	-70	33
194	112	986	-21	214	194	369	598	51	12	194	814	304	53	-72	194	404	684	186	-27	194	115	657	-44	21	194	481	824	-73	-5	194	461	548	-80	-46	194	587	950	-171	-15	194	829	110	-150	-21	194	892	333	-77	36
195	112	986	-21	214	195	368	597	50	11	195	818	305	57	-71	195	406	682	188	-29	195	110	653	-49	17	195	477	824	-77	-5	195	461	549	-80	-45	195	599	942	-159	-23	195	827	110	-152	-21	195	889	336	-80	39
196	110	986	-23	214	196	366	598	48	12	196	819	305	58	-71	196	409	681	191	-30	196	110	652	-49	16	196	473	825	-81	-4	196	460	548	-81	-46	196	598	942	-160	-23	196	827	108	-152	-23	196	887	340	-82	43
197	110	986	-23	214	197	365	597	47	11	197	815	305	54	-71	197	413	681	195	-30	197	107	653	-52	17	197	473	825	-81	-4	197	460	548	-81	-46	197	598	942	-160	-23	197	827	108	-152	-23	197	887	344	-82	47
198	109	985	-24	213	198	364	597	46	11	198	815	307	54	-69	198	413	681	195	-30	198	104	653	-55	17	198	472	825	-82	-4	198	460	546	-81	-48	198	598	942	-160	-23	198	826	108	-153	-23	198	890	346	-79	49
199	109	985	-24	213	199	362	597	44	11	199	815	310	54	-66	199	413	678	195	-33	199	94	656	-65	20	199	471	825	-83	-4	199	460	546	-81	-48	199	598	942	-160	-23	199	826	108	-153	-23	199	896	346	-73	49
200	109	985	-24	213	200	361	597	43	11	200	816	310	55	-66	200	415	676	197	-35	200	87	657	-72	21	200	470	825	-84	-4	200	460	545	-81	-49	200	597	942	-161	-23	200	826	108	-153	-23	200	898	346	-71	49
[truncated: 130 more columns]

## Sheet: SuppFig4-cKO Trajectories
Plotted Trajectories for Figure 2B and Supp Fig 3. Relative X and Relative Y are seen plotted for each trajectory
Cell 1					Cell 2					Cell 3					Cell 4					Cell 5					Cell 6					Cell 7					Cell 8					Cell 9					Cell 10
Frame	X Position	Y Position	relative X	relative Y	Frame	X Position	Y Position	relative X	relative Y	Frame	X Position	Y Position	relative X	relative Y	Frame	X Position	Y Position	relative X	relative Y	Frame	X Position	Y Position	relative X	relative Y	Frame	X Position	Y Position	relative X	relative Y	Frame	X Position	Y Position	relative X	relative Y	Frame	X Position	Y Position	relative X	relative Y	Frame	X Position	Y Position	relative X	relative Y	Frame	X Position	Y Position	relative X	relative Y
1	470	537			1	104	591	0	0	1	444	591	0	0	1	484	480	0	0	1	557	545	0	0	1	224	677	0	0	1	511	420	0	0	1	461	401	0	0	1	336	733	0	0	1	911	299	0	0
2	470	537	0	0	2	105	591	1	0	2	444	592	0	1	2	484	479	0	-1	2	556	545	-1	0	2	226	678	2	1	2	511	420	0	0	2	461	397	0	-4	2	338	732	2	-1	2	914	301	3	2
3	470	538	0	1	3	105	590	1	-1	3	444	593	0	2	3	485	483	1	3	3	555	546	-2	1	3	227	678	3	1	3	505	419	-6	-1	3	464	392	3	-9	3	338	731	2	-2	3	918	301	7	2
4	470	539	0	2	4	106	590	2	-1	4	444	596	0	5	4	483	488	-1	8	4	555	547	-2	2	4	233	688	9	11	4	503	419	-8	-1	4	468	390	7	-11	4	340	729	4	-4	4	918	301	7	2
5	470	540	0	3	5	106	590	2	-1	5	445	591	1	0	5	480	491	-4	11	5	554	547	-3	2	5	233	689	9	12	5	503	419	-8	-1	5	469	388	8	-13	5	338	734	2	1	5	922	300	11	1
6	469	543	-1	6	6	107	590	3	-1	6	444	591	0	0	6	477	494	-7	14	6	551	549	-6	4	6	230	691	6	14	6	499	419	-12	-1	6	463	382	2	-19	6	339	741	3	8	6	925	300	14	1
7	470	544	0	7	7	106	591	2	0	7	443	593	-1	2	7	471	493	-13	13	7	550	549	-7	4	7	229	690	5	13	7	493	421	-18	1	7	461	380	0	-21	7	338	746	2	13	7	928	303	17	4
8	471	545	1	8	8	106	592	2	1	8	443	595	-1	4	8	465	502	-19	22	8	547	549	-10	4	8	229	689	5	12	8	502	422	-9	2	8	461	375	0	-26	8	327	754	-9	21	8	932	305	21	6
9	471	547	1	10	9	105	593	1	2	9	444	596	0	5	9	456	505	-28	25	9	547	550	-10	5	9	230	687	6	10	9	495	424	-16	4	9	461	370	0	-31	9	325	757	-11	24	9	936	312	25	13
10	470	551	0	14	10	105	594	1	3	10	443	596	-1	5	10	453	506	-31	26	10	547	549	-10	4	10	230	686	6	9	10	491	422	-20	2	10	460	366	-1	-35	10	319	754	-17	21	10	936	312	25	13
11	468	554	-2	17	11	105	596	1	5	11	444	598	0	7	11	462	507	-22	27	11	549	549	-8	4	11	231	686	7	9	11	483	418	-28	-2	11	457	365	-4	-36	11	314	741	-22	8	11	930	303	19	4
12	467	557	-3	20	12	104	597	0	6	12	444	597	0	6	12	460	509	-24	29	12	546	549	-11	4	12	231	683	7	6	12	502	427	-9	7	12	456	362	-5	-39	12	314	738	-22	5	12	932	303	21	4
13	465	561	-5	24	13	104	598	0	7	13	443	597	-1	6	13	461	511	-23	31	13	547	549	-10	4	13	231	682	7	5	13	502	425	-9	5	13	458	352	-3	-49	13	315	736	-21	3	13	932	303	21	4
14	461	565	-9	28	14	104	598	0	7	14	443	597	-1	6	14	459	515	-25	35	14	548	549	-9	4	14	233	682	9	5	14	495	422	-16	2	14	453	341	-8	-60	14	315	733	-21	0	14	931	301	20	2
15	461	567	-9	30	15	104	599	0	8	15	442	597	-2	6	15	456	518	-28	38	15	550	549	-7	4	15	234	682	10	5	15	495	422	-16	2	15	449	333	-12	-68	15	319	733	-17	0	15	936	303	25	4
16	460	572	-10	35	16	103	599	-1	8	16	442	597	-2	6	16	455	522	-29	42	16	549	549	-8	4	16	235	681	11	4	16	484	420	-27	0	16	450	330	-11	-71	16	331	728	-5	-5	16	959	317	48	18
17	460	575	-10	38	17	103	600	-1	9	17	443	598	-1	7	17	455	527	-29	47	17	549	551	-8	6	17	237	681	13	4	17	484	418	-27	-2	17	449	327	-12	-74	17	334	725	-2	-8	17	961	317	50	18
18	460	577	-10	40	18	102	600	-2	9	18	442	598	-2	7	18	457	531	-27	51	18	550	550	-7	5	18	240	681	16	4	18	484	413	-27	-7	18	447	321	-14	-80	18	335	723	-1	-10	18	965	317	54	18
19	460	579	-10	42	19	102	601	-2	10	19	441	598	-3	7	19	462	529	-22	49	19	550	550	-7	5	19	243	680	19	3	19	483	406	-28	-14	19	444	317	-17	-84	19	336	717	0	-16	19	970	317	59	18
20	460	582	-10	45	20	102	601	-2	10	20	443	598	-1	7	20	467	525	-17	45	20	551	548	-6	3	20	245	680	21	3	20	507	416	-4	-4	20	443	312	-18	-89	20	355	711	19	-22	20	950	317	39	18
21	461	585	-9	48	21	101	602	-3	11	21	441	598	-3	7	21	472	525	-12	45	21	552	548	-5	3	21	248	680	24	3	21	510	422	-1	2	21	444	310	-17	-91	21	357	711	21	-22	21	949	317	38	18
22	461	586	-9	49	22	100	602	-4	11	22	441	600	-3	9	22	473	526	-11	46	22	551	551	-6	6	22	252	677	28	0	22	509	422	-2	2	22	442	306	-19	-95	22	376	716	40	-17	22	954	322	43	23
23	460	588	-10	51	23	99	604	-5	13	23	441	599	-3	8	23	476	524	-8	44	23	548	551	-9	6	23	254	677	30	0	23	495	415	-16	-5	23	441	305	-20	-96	23	369	708	33	-25	23	958	331	47	32
24	460	589	-10	52	24	98	608	-6	17	24	443	600	-1	9	24	478	522	-6	42	24	541	550	-16	5	24	256	678	32	1	24	483	410	-28	-10	24	440	307	-21	-94	24	360	696	24	-37	24	955	332	44	33
25	460	590	-10	53	25	97	609	-7	18	25	443	601	-1	10	25	478	522	-6	42	25	538	549	-19	4	25	258	679	34	2	25	476	404	-35	-16	25	438	306	-23	-95	25	361	686	25	-47	25	949	332	38	33
26	462	591	-8	54	26	97	611	-7	20	26	445	603	1	12	26	476	522	-8	42	26	535	548	-22	3	26	262	679	38	2	26	472	400	-39	-20	26	440	305	-21	-96	26	361	678	25	-55	26	942	323	31	24
27	462	591	-8	54	27	98	614	-6	23	27	445	603	1	12	27	470	521	-14	41	27	533	548	-24	3	27	261	683	37	6	27	472	400	-39	-20	27	440	305	-21	-96	27	347	670	11	-63	27	933	296	22	-3
28	461	591	-9	54	28	97	615	-7	24	28	443	604	-1	13	28	470	509	-14	29	28	530	549	-27	4	28	265	682	41	5	28	458	397	-53	-23	28	439	310	-22	-91	28	334	685	-2	-48	28	937	298	26	-1
29	462	591	-8	54	29	98	619	-6	28	29	442	600	-2	9	29	501	511	17	31	29	529	550	-28	5	29	267	683	43	6	29	458	397	-53	-23	29	436	312	-25	-89	29	331	690	-5	-43	29	937	299	26	0
30	461	591	-9	54	30	99	620	-5	29	30	442	604	-2	13	30	496	518	12	38	30	529	553	-28	8	30	270	680	46	3	30	458	397	-53	-23	30	433	312	-28	-89	30	330	699	-6	-34	30	939	300	28	1
31	462	593	-8	56	31	100	621	-4	30	31	442	604	-2	13	31	492	521	8	41	31	528	553	-29	8	31	273	679	49	2	31	458	397	-53	-23	31	433	308	-28	-93	31	327	700	-9	-33	31	940	298	29	-1
32	462	593	-8	56	32	103	624	-1	33	32	442	603	-2	12	32	487	528	3	48	32	527	552	-30	7	32	277	677	53	0	32	453	395	-58	-25	32	435	303	-26	-98	32	322	700	-14	-33	32	937	298	26	-1
33	461	594	-9	57	33	104	623	0	32	33	445	602	1	11	33	507	532	23	52	33	528	548	-29	3	33	279	678	55	1	33	444	389	-67	-31	33	435	300	-26	-101	33	342	700	6	-33	33	932	298	21	-1
34	461	594	-9	57	34	106	626	2	35	34	446	601	2	10	34	509	533	25	53	34	528	546	-29	1	34	282	679	58	2	34	444	389	-67	-31	34	434	298	-27	-103	34	346	698	10	-35	34	931	296	20	-3
35	460	594	-10	57	35	107	626	3	35	35	445	600	1	9	35	500	517	16	37	35	526	539	-31	-6	35	285	680	61	3	35	446	389	-65	-31	35	432	294	-29	-107	35	340	696	4	-37	35	930	296	19	-3
36	459	595	-11	58	36	109	627	5	36	36	444	601	0	10	36	500	517	16	37	36	524	535	-33	-10	36	288	683	64	6	36	446	389	-65	-31	36	427	292	-34	-109	36	329	696	-7	-37	36	928	300	17	1
37	459	595	-11	58	37	110	625	6	34	37	442	601	-2	10	37	501	518	17	38	37	523	535	-34	-10	37	290	686	66	9	37	447	389	-64	-31	37	425	288	-36	-113	37	325	702	-11	-31	37	930	312	19	13
38	459	596	-11	59	38	109	626	5	35	38	443	602	-1	11	38	501	516	17	36	38	524	534	-33	-11	38	292	687	68	10	38	448	390	-63	-30	38	425	285	-36	-116	38	327	702	-9	-31	38	932	318	21	19
39	458	596	-12	59	39	110	627	6	36	39	443	601	-1	10	39	502	516	18	36	39	524	532	-33	-13	39	295	687	71	10	39	450	390	-61	-30	39	426	280	-35	-121	39	344	702	8	-31	39	932	318	21	19
40	458	596	-12	59	40	111	627	7	36	40	447	603	3	12	40	502	516	18	36	40	523	531	-34	-14	40	300	684	76	7	40	450	390	-61	-30	40	424	278	-37	-123	40	340	704	4	-29	40	932	318	21	19
41	457	597	-13	60	41	110	630	6	39	41	446	605	2	14	41	500	518	16	38	41	520	531	-37	-14	41	303	685	79	8	41	450	389	-61	-31	41	421	275	-40	-126	41	334	707	-2	-26	41	931	319	20	20
42	458	596	-12	59	42	112	630	8	39	42	443	605	-1	14	42	500	516	16	36	42	520	530	-37	-15	42	308	678	84	1	42	450	389	-61	-31	42	417	276	-44	-125	42	335	714	-1	-19	42	925	319	14	20
43	457	597	-13	60	43	113	630	9	39	43	445	603	1	12	43	498	517	14	37	43	519	532	-38	-13	43	314	670	90	-7	43	450	389	-61	-31	43	413	279	-48	-122	43	335	716	-1	-17	43	918	319	7	20
44	457	597	-13	60	44	113	630	9	39	44	445	604	1	13	44	497	518	13	38	44	519	534	-38	-11	44	318	679	94	2	44	450	389	-61	-31	44	411	281	-50	-120	44	329	723	-7	-10	44	916	319	5	20
45	457	597	-13	60	45	114	631	10	40	45	445	603	1	12	45	523	526	39	46	45	519	534	-38	-11	45	315	692	91	15	45	450	389	-61	-31	45	408	280	-53	-121	45	298	748	-38	15	45	913	321	2	22
46	454	600	-16	63	46	117	632	13	41	46	445	603	1	12	46	523	524	39	44	46	520	525	-37	-20	46	318	691	94	14	46	450	389	-61	-31	46	404	281	-57	-120	46	297	750	-39	17	46	912	324	1	25
47	453	600	-17	63	47	116	635	12	44	47	444	602	0	11	47	524	524	40	44	47	521	523	-36	-22	47	322	690	98	13	47	450	389	-61	-31	47	402	280	-59	-121	47	296	757	-40	24	47	911	326	0	27
48	453	600	-17	63	48	117	634	13	43	48	442	605	-2	14	48	524	526	40	46	48	490	502	-67	-43	48	325	690	101	13	48	450	389	-61	-31	48	400	279	-61	-122	48	294	766	-42	33	48	908	323	-3	24
49	453	600	-17	63	49	118	632	14	41	49	444	605	0	14	49	535	515	51	35	49	458	516	-99	-29	49	329	691	105	14	49	450	385	-61	-35	49	397	277	-64	-124	49	294	772	-42	39	49	913	324	2	25
50	452	601	-18	64	50	118	635	14	44	50	448	603	4	12	50	567	527	83	47	50	448	501	-109	-44	50	332	692	108	15	50	450	383	-61	-37	50	394	272	-67	-129	50	302	779	-34	46	50	914	330	3	31
51	449	604	-21	67	51	120	634	16	43	51	448	603	4	12	51	533	493	49	13	51	450	500	-107	-45	51	335	691	111	14	51	448	379	-63	-41	51	390	268	-71	-133	51	294	787	-42	54	51	912	333	1	34
52	448	604	-22	67	52	121	633	17	42	52	448	602	4	11	52	504	514	20	34	52	449	501	-108	-44	52	338	693	114	16	52	430	370	-81	-50	52	382	263	-79	-138	52	276	782	-60	49	52	909	338	-2	39
53	448	604	-22	67	53	121	634	17	43	53	447	602	3	11	53	505	518	21	38	53	449	498	-108	-47	53	341	693	117	16	53	428	369	-83	-51	53	374	260	-87	-141	53	274	779	-62	46	53	909	338	-2	39
54	448	603	-22	66	54	122	634	18	43	54	446	601	2	10	54	513	522	29	42	54	447	496	-110	-49	54	344	691	120	14	54	422	363	-89	-57	54	368	256	-93	-145	54	279	774	-57	41	54	918	337	7	38
55	448	603	-22	66	55	123	633	19	42	55	447	601	3	10	55	519	521	35	41	55	443	495	-114	-50	55	346	688	122	11	55	422	363	-89	-57	55	366	246	-95	-155	55	285	769	-51	36	55	925	333	14	34
56	446	606	-24	69	56	124	630	20	39	56	447	604	3	13	56	518	526	34	46	56	440	495	-117	-50	56	348	690	124	13	56	430	359	-81	-61	56	366	240	-95	-161	56	292	763	-44	30	56	925	331	14	32
57	447	605	-23	68	57	126	630	22	39	57	446	605	2	14	57	518	527	34	47	57	439	494	-118	-51	57	349	688	125	11	57	428	352	-83	-68	57	370	232	-91	-169	57	292	761	-44	28	57	917	327	6	28
58	446	606	-24	69	58	127	630	23	39	58	445	604	1	13	58	518	530	34	50	58	439	492	-118	-53	58	348	688	124	11	58	427	351	-84	-69	58	372	226	-89	-175	58	292	761	-44	28	58	917	323	6	24
59	446	606	-24	69	59	127	630	23	39	59	446	605	2	14	59	518	531	34	51	59	440	490	-117	-55	59	345	687	121	10	59	425	351	-86	-69	59	373	220	-88	-181	59	287	755	-49	22	59	917	322	6	23
60	446	606	-24	69	60	122	632	18	41	60	446	605	2	14	60	517	531	33	51	60	436	496	-121	-49	60	346	685	122	8	60	428	346	-83	-74	60	375	214	-86	-187	60	287	755	-49	22	60	911	315	0	16
61	445	607	-25	70	61	124	635	20	44	61	447	605	3	14	61	521	529	37	49	61	431	504	-126	-41	61	346	683	122	6	61	429	344	-82	-76	61	377	211	-84	-190	61	283	750	-53	17	61	903	314	-8	15
62	444	608	-26	71	62	120	632	16	41	62	447	605	3	14	62	521	528	37	48	62	427	491	-130	-54	62	348	681	124	4	62	419	330	-92	-90	62	379	206	-82	-195	62	284	748	-52	15	62	900	314	-11	15
63	444	608	-26	71	63	120	632	16	41	63	446	606	2	15	63	521	528	37	48	63	421	490	-136	-55	63	347	678	123	1	63	439	336	-72	-84	63	380	200	-81	-201	63	302	748	-34	15	63	899	314	-12	15
64	444	607	-26	70	64	121	632	17	41	64	446	607	2	16	64	515	533	31	53	64	417	493	-140	-52	64	346	675	122	-2	64	439	333	-72	-87	64	377	195	-84	-206	64	302	744	-34	11	64	899	313	-12	14
65	443	608	-27	71	65	121	632	17	41	65	444	605	0	14	65	511	535	27	55	65	415	492	-142	-53	65	344	674	120	-3	65	437	328	-74	-92	65	379	188	-82	-213	65	300	734	-36	1	65	902	313	-9	14
66	442	610	-28	73	66	120	634	16	43	66	443	606	-1	15	66	511	536	27	56	66	413	489	-144	-56	66	347	673	123	-4	66	440	326	-71	-94	66	380	181	-81	-220	66	294	717	-42	-16	66	908	313	-3	14
67	443	609	-27	72	67	120	632	16	41	67	441	608	-3	17	67	511	536	27	56	67	411	487	-146	-58	67	348	671	124	-6	67	443	326	-68	-94	67	379	174	-82	-227	67	293	704	-43	-29	67	907	312	-4	13
68	442	610	-28	73	68	119	631	15	40	68	441	609	-3	18	68	511	534	27	54	68	409	484	-148	-61	68	348	671	124	-6	68	443	332	-68	-88	68	378	167	-83	-234	68	288	695	-48	-38	68	905	310	-6	11
69	442	611	-28	74	69	122	629	18	38	69	440	608	-4	17	69	502	541	18	61	69	407	481	-150	-64	69	348	670	124	-7	69	441	332	-70	-88	69	376	161	-85	-240	69	281	691	-55	-42	69	903	310	-8	11
70	442	611	-28	74	70	121	631	17	40	70	443	610	-1	19	70	503	541	19	61	70	405	478	-152	-67	70	349	669	125	-8	70	439	334	-72	-86	70	377	156	-84	-245	70	281	691	-55	-42	70	903	313	-8	14
71	442	612	-28	75	71	121	632	17	41	71	444	613	0	22	71	503	540	19	60	71	407	474	-150	-71	71	348	669	124	-8	71	437	335	-74	-85	71	378	153	-83	-248	71	291	687	-45	-46	71	913	319	2	20
72	442	612	-28	75	72	121	630	17	39	72	445	614	1	23	72	500	538	16	58	72	407	474	-150	-71	72	348	667	124	-10	72	439	335	-72	-85	72	377	151	-84	-250	72	297	686	-39	-47	72	913	315	2	16
73	442	612	-28	75	73	122	630	18	39	73	444	615	0	24	73	496	539	12	59	73	412	469	-145	-76	73	347	665	123	-12	73	439	334	-72	-86	73	375	149	-86	-252	73	301	683	-35	-50	73	919	317	8	18
74	442	612	-28	75	74	122	631	18	40	74	443	615	-1	24	74	495	540	11	60	74	415	461	-142	-84	74	347	663	123	-14	74	437	334	-74	-86	74	372	145	-89	-256	74	313	682	-23	-51	74	923	318	12	19
75	442	612	-28	75	75	122	631	18	40	75	443	616	-1	25	75	491	547	7	67	75	415	456	-142	-89	75	346	662	122	-15	75	435	334	-76	-86	75	380	144	-81	-257	75	317	681	-19	-52	75	923	323	12	24
76	442	614	-28	77	76	122	632	18	41	76	442	617	-2	26	76	490	554	6	74	76	415	456	-142	-89	76	346	661	122	-16	76	433	334	-78	-86	76	378	143	-83	-258	76	311	678	-25	-55	76	922	324	11	25
77	442	614	-28	77	77	122	631	18	40	77	441	618	-3	27	77	490	559	6	79	77	412	456	-145	-89	77	346	658	122	-19	77	430	335	-81	-85	77	378	141	-83	-260	77	305	674	-31	-59	77	921	326	10	27
78	442	615	-28	78	78	122	631	18	40	78	441	617	-3	26	78	491	563	7	83	78	408	456	-149	-89	78	345	655	121	-22	78	428	336	-83	-84	78	376	141	-85	-260	78	302	674	-34	-59	78	923	324	12	25
79	442	616	-28	79	79	122	630	18	39	79	441	619	-3	28	79	490	565	6	85	79	405	458	-152	-87	79	343	654	119	-23	79	425	338	-86	-82	79	381	141	-80	-260	79	302	670	-34	-63	79	921	327	10	28
80	442	616	-28	79	80	122	630	18	39	80	441	620	-3	29	80	489	565	5	85	80	404	462	-153	-83	80	341	651	117	-26	80	425	338	-86	-82	80	385	137	-76	-264	80	310	670	-26	-63	80	919	330	8	31
81	441	619	-29	82	81	122	631	18	40	81	440	619	-4	28	81	493	568	9	88	81	404	461	-153	-84	81	338	650	114	-27	81	424	340	-87	-80	81	385	136	-76	-265	81	319	677	-17	-56	81	919	330	8	31
82	442	619	-28	82	82	122	632	18	41	82	442	622	-2	31	82	498	570	14	90	82	404	463	-153	-82	82	337	647	113	-30	82	413	340	-98	-80	82	384	136	-77	-265	82	319	678	-17	-55	82	925	322	14	23
83	441	620	-29	83	83	121	631	17	40	83	443	622	-1	31	83	496	564	12	84	83	405	460	-152	-85	83	336	642	112	-35	83	411	341	-100	-79	83	383	135	-78	-266	83	318	678	-18	-55	83	925	322	14	23
84	441	620	-29	83	84	122	630	18	39	84	442	621	-2	30	84	495	563	11	83	84	406	456	-151	-89	84	335	639	111	-38	84	407	344	-104	-76	84	386	127	-75	-274	84	315	678	-21	-55	84	923	317	12	18
85	440	620	-30	83	85	122	629	18	38	85	443	622	-1	31	85	499	561	15	81	85	405	456	-152	-89	85	333	636	109	-41	85	405	348	-106	-72	85	388	131	-73	-270	85	314	677	-22	-56	85	925	317	14	18
86	439	621	-31	84	86	123	629	19	38	86	445	622	1	31	86	503	559	19	79	86	406	455	-151	-90	86	332	632	108	-45	86	402	353	-109	-67	86	392	130	-69	-271	86	314	673	-22	-60	86	926	326	15	27
87	439	620	-31	83	87	122	629	18	38	87	445	621	1	30	87	502	557	18	77	87	406	452	-151	-93	87	330	629	106	-48	87	396	354	-115	-66	87	394	131	-67	-270	87	318	670	-18	-63	87	925	326	14	27
88	440	619	-30	82	88	122	628	18	37	88	447	622	3	31	88	501	554	17	74	88	407	452	-150	-93	88	326	627	102	-50	88	393	358	-118	-62	88	392	137	-69	-264	88	322	669	-14	-64	88	909	322	-2	23
89	438	620	-32	83	89	121	628	17	37	89	447	622	3	31	89	498	560	14	80	89	408	445	-149	-100	89	324	624	100	-53	89	391	360	-120	-60	89	393	141	-68	-260	89	323	672	-13	-61	89	908	321	-3	22
90	437	621	-33	84	90	122	627	18	36	90	443	621	-1	30	90	492	566	8	86	90	407	443	-150	-102	90	322	621	98	-56	90	388	366	-123	-54	90	384	149	-77	-252	90	323	672	-13	-61	90	909	321	-2	22
91	437	620	-33	83	91	122	627	18	36	91	443	619	-1	28	91	491	570	7	90	91	405	442	-152	-103	91	320	620	96	-57	91	382	370	-129	-50	91	388	151	-73	-250	91	323	676	-13	-57	91	917	319	6	20
92	438	621	-32	84	92	123	624	19	33	92	442	620	-2	29	92	487	572	3	92	92	404	444	-153	-101	92	318	619	94	-58	92	382	371	-129	-49	92	390	152	-71	-249	92	326	678	-10	-55	92	917	319	6	20
93	439	623	-31	86	93	124	623	20	32	93	443	620	-1	29	93	491	576	7	96	93	398	451	-159	-94	93	317	617	93	-60	93	382	372	-129	-48	93	397	153	-64	-248	93	331	682	-5	-51	93	925	317	14	18
94	438	624	-32	87	94	123	622	19	31	94	444	623	0	32	94	494	576	10	96	94	394	452	-163	-93	94	317	615	93	-62	94	382	379	-129	-41	94	400	156	-61	-245	94	331	682	-5	-51	94	926	313	15	14
95	439	624	-31	87	95	121	622	17	31	95	445	625	1	34	95	494	571	10	91	95	390	451	-167	-94	95	317	613	93	-64	95	378	385	-133	-35	95	405	158	-56	-243	95	332	682	-4	-51	95	928	309	17	10
96	440	624	-30	87	96	121	622	17	31	96	446	625	2	34	96	497	567	13	87	96	383	456	-174	-89	96	317	613	93	-64	96	376	389	-135	-31	96	409	157	-52	-244	96	331	685	-5	-48	96	930	309	19	10
97	440	624	-30	87	97	120	621	16	30	97	448	627	4	36	97	500	562	16	82	97	376	457	-181	-88	97	316	611	92	-66	97	369	397	-142	-23	97	409	151	-52	-250	97	332	687	-4	-46	97	914	307	3	8
98	440	625	-30	88	98	120	620	16	29	98	447	629	3	38	98	501	564	17	84	98	401	482	-156	-63	98	316	611	92	-66	98	356	394	-155	-26	98	408	149	-53	-252	98	332	687	-4	-46	98	914	303	3	4
99	440	625	-30	88	99	119	621	15	30	99	446	629	2	38	99	498	567	14	87	99	397	470	-160	-75	99	316	610	92	-67	99	366	394	-145	-26	99	414	149	-47	-252	99	329	686	-7	-47	99	914	300	3	1
100	438	626	-32	89	100	119	619	15	28	100	444	629	0	38	100	497	566	13	86	100	421	492	-136	-53	100	316	609	92	-68	100	361	387	-150	-33	100	421	149	-40	-252	100	329	685	-7	-48	100	914	298	3	-1
101	437	627	-33	90	101	120	618	16	27	101	446	628	2	37	101	500	568	16	88	101	416	478	-141	-67	101	316	609	92	-68	101	353	391	-158	-29	101	428	148	-33	-253	101	329	682	-7	-51	101	922	298	11	-1
102	439	626	-31	89	102	119	619	15	28	102	445	627	1	36	102	501	569	17	89	102	381	472	-176	-73	102	318	608	94	-69	102	351	394	-160	-26	102	431	148	-30	-253	102	327	679	-9	-54	102	922	298	11	-1
103	441	625	-29	88	103	118	618	14	27	103	447	629	3	38	103	502	570	18	90	103	368	478	-189	-67	103	319	605	95	-72	103	347	399	-164	-21	103	427	154	-34	-247	103	327	677	-9	-56	103	922	294	11	-5
104	437	631	-33	94	104	118	618	14	27	104	446	630	2	39	104	501	572	17	92	104	368	477	-189	-68	104	320	604	96	-73	104	342	402	-169	-18	104	425	154	-36	-247	104	327	677	-9	-56	104	923	293	12	-6
105	448	622	-22	85	105	117	618	13	27	105	446	628	2	37	105	500	574	16	94	105	372	454	-185	-91	105	321	602	97	-75	105	337	404	-174	-16	105	429	140	-32	-261	105	325	664	-11	-69	105	925	291	14	-8
106	445	626	-25	89	106	118	617	14	26	106	448	629	4	38	106	501	573	17	93	106	373	457	-184	-88	106	321	599	97	-78	106	336	404	-175	-16	106	428	132	-33	-269	106	325	660	-11	-73	106	927	279	16	-20
107	445	626	-25	89	107	118	617	14	26	107	449	630	5	39	107	500	571	16	91	107	376	459	-181	-86	107	321	598	97	-79	107	338	400	-173	-20	107	428	129	-33	-272	107	325	655	-11	-78	107	933	273	22	-26
108	443	627	-27	90	108	117	618	13	27	108	446	627	2	36	108	496	570	12	90	108	377	462	-180	-83	108	321	597	97	-80	108	338	396	-173	-24	108	424	129	-37	-272	108	327	644	-9	-89	108	933	273	22	-26
109	444	626	-26	89	109	116	618	12	27	109	450	630	6	39	109	493	570	9	90	109	369	459	-188	-86	109	322	597	98	-80	109	339	394	-172	-26	109	423	130	-38	-271	109	327	638	-9	-95	109	928	271	17	-28
110	440	629	-30	92	110	116	616	12	25	110	450	631	6	40	110	493	569	9	89	110	351	451	-206	-94	110	323	596	99	-81	110	338	394	-173	-26	110	423	132	-38	-269	110	342	601	6	-132	110	927	271	16	-28
111	439	631	-31	94	111	117	613	13	22	111	451	633	7	42	111	495	569	11	89	111	354	450	-203	-95	111	324	596	100	-81	111	329	397	-182	-23	111	424	132	-37	-269	111	342	589	6	-144	111	926	270	15	-29
112	438	632	-32	95	112	116	614	12	23	112	453	635	9	44	112	495	569	11	89	112	353	448	-204	-97	112	324	597	100	-80	112	328	399	-183	-21	112	424	132	-37	-269	112	342	588	6	-145	112	931	272	20	-27
113	433	635	-37	98	113	116	614	12	23	113	454	635	10	44	113	493	568	9	88	113	352	445	-205	-100	113	325	597	101	-80	113	331	396	-180	-24	113	425	133	-36	-268	113	339	593	3	-140	113	931	276	20	-23
114	431	635	-39	98	114	115	615	11	24	114	457	636	13	45	114	518	588	34	108	114	346	443	-211	-102	114	325	598	101	-79	114	332	391	-179	-29	114	426	132	-35	-269	114	339	594	3	-139	114	885	266	-26	-33
115	431	637	-39	100	115	116	615	12	24	115	461	637	17	46	115	492	567	8	87	115	341	439	-216	-106	115	327	598	103	-79	115	332	389	-179	-31	115	427	132	-34	-269	115	339	594	3	-139	115	885	263	-26	-36
116	429	638	-41	101	116	116	616	12	25	116	464	639	20	48	116	492	565	8	85	116	342	437	-215	-108	116	329	599	105	-78	116	331	388	-180	-32	116	428	129	-33	-272	116	339	594	3	-139	116	881	261	-30	-38
117	426	640	-44	103	117	116	618	12	27	117	467	639	23	48	117	494	564	10	84	117	337	438	-220	-107	117	331	599	107	-78	117	335	387	-176	-33	117	431	126	-30	-275	117	339	594	3	-139	117	876	263	-35	-36
118	422	641	-48	104	118	117	616	13	25	118	471	640	27	49	118	496	564	12	84	118	335	437	-222	-108	118	333	598	109	-79	118	341	378	-170	-42	118	426	123	-35	-278	118	339	590	3	-143	118	877	266	-34	-33
119	421	643	-49	106	119	118	616	14	25	119	477	643	33	52	119	496	565	12	85	119	332	437	-225	-108	119	334	598	110	-79	119	338	373	-173	-47	119	424	123	-37	-278	119	339	589	3	-144	119	889	262	-22	-37
120	418	642	-52	105	120	118	616	14	25	120	481	644	37	53	120	501	563	17	83	120	329	437	-228	-108	120	335	598	111	-79	120	337	371	-174	-49	120	421	117	-40	-284	120	340	590	4	-143	120	894	253	-17	-46
121	416	643	-54	106	121	120	614	16	23	121	486	647	42	56	121	501	567	17	87	121	331	438	-226	-107	121	337	599	113	-78	121	337	363	-174	-57	121	420	115	-41	-286	121	342	592	6	-141	121	898	252	-13	-47
122	415	644	-55	107	122	119	616	15	25	122	490	648	46	57	122	503	570	19	90	122	326	439	-231	-106	122	337	598	113	-79	122	331	356	-180	-64	122	420	113	-41	-288	122	344	589	8	-144	122	903	247	-8	-52
123	413	645	-57	108	123	120	617	16	26	123	495	649	51	58	123	503	572	19	92	123	324	440	-233	-105	123	337	598	113	-79	123	330	354	-181	-66	123	420	114	-41	-287	123	347	586	11	-147	123	898	252	-13	-47
124	412	646	-58	109	124	120	618	16	27	124	502	650	58	59	124	505	572	21	92	124	321	441	-236	-104	124	338	598	114	-79	124	328	353	-183	-67	124	420	116	-41	-285	124	351	583	15	-150	124	898	257	-13	-42
125	411	645	-59	108	125	120	618	16	27	125	509	651	65	60	125	512	570	28	90	125	319	443	-238	-102	125	339	597	115	-80	125	328	350	-183	-70	125	419	118	-42	-283	125	352	581	16	-152	125	904	263	-7	-36
126	410	646	-60	109	126	120	619	16	28	126	515	652	71	61	126	516	569	32	89	126	321	450	-236	-95	126	341	596	117	-81	126	325	346	-186	-74	126	420	118	-41	-283	126	355	580	19	-153	126	908	270	-3	-29
127	410	646	-60	109	127	121	618	17	27	127	512	651	68	60	127	514	570	30	90	127	316	456	-241	-89	127	343	597	119	-80	127	323	345	-188	-75	127	419	115	-42	-286	127	357	580	21	-153	127	909	275	-2	-24
128	412	635	-58	98	128	121	619	17	28	128	506	650	62	59	128	512	569	28	89	128	313	461	-244	-84	128	345	598	121	-79	128	323	344	-188	-76	128	421	111	-40	-290	128	357	580	21	-153	128	891	290	-20	-9
129	413	634	-57	97	129	121	620	17	29	129	508	650	64	59	129	516	561	32	81	129	311	464	-246	-81	129	348	600	124	-77	129	319	344	-192	-76	129	423	108	-38	-293	129	357	584	21	-149	129	885	296	-26	-3
130	413	634	-57	97	130	121	621	17	30	130	508	649	64	58	130	504	572	20	92	130	308	466	-249	-79	130	352	602	128	-75	130	318	342	-193	-78	130	424	105	-37	-296	130	356	586	20	-147	130	894	300	-17	1
131	412	636	-58	99	131	121	622	17	31	131	507	649	63	58	131	504	572	20	92	131	307	466	-250	-79	131	356	604	132	-73	131	316	341	-195	-79	131	425	103	-36	-298	131	356	586	20	-147	131	889	304	-22	5
132	411	638	-59	101	132	121	623	17	32	132	504	649	60	58	132	505	573	21	93	132	307	465	-250	-80	132	360	604	136	-73	132	313	341	-198	-79	132	426	97	-35	-304	132	356	588	20	-145	132	884	308	-27	9
133	410	639	-60	102	133	121	623	17	32	133	502	649	58	58	133	502	573	18	93	133	298	465	-259	-80	133	365	604	141	-73	133	313	341	-198	-79	133	428	91	-33	-310	133	356	586	20	-147	133	890	307	-21	8
134	398	642	-72	105	134	120	624	16	33	134	503	647	59	56	134	503	571	19	91	134	298	468	-259	-77	134	369	605	145	-72	134	313	338	-198	-82	134	429	86	-32	-315	134	357	586	21	-147	134	911	308	0	9
135	397	643	-73	106	135	120	624	16	33	135	491	646	47	55	135	504	567	20	87	135	302	468	-255	-77	135	373	604	149	-73	135	312	338	-199	-82	135	425	79	-36	-322	135	357	586	21	-147	135	911	308	0	9
136	392	647	-78	110	136	120	626	16	35	136	491	648	47	57	136	506	569	22	89	136	305	471	-252	-74	136	378	603	154	-74	136	312	333	-199	-87	136	424	73	-37	-328	136	356	586	20	-147	136	908	296	-3	-3
137	388	648	-82	111	137	120	626	16	35	137	490	648	46	57	137	507	568	23	88	137	330	501	-227	-44	137	382	603	158	-74	137	307	328	-204	-92	137	416	71	-45	-330	137	356	586	20	-147	137	903	287	-8	-12
138	385	650	-85	113	138	118	627	14	36	138	489	647	45	56	138	507	569	23	89	138	319	478	-238	-67	138	386	604	162	-73	138	306	327	-205	-93	138	406	71	-55	-330	138	356	586	20	-147	138	902	276	-9	-23
139	378	652	-92	115	139	119	628	15	37	139	488	647	44	56	139	507	569	23	89	139	341	503	-216	-42	139	389	602	165	-75	139	302	327	-209	-93	139	405	74	-56	-327	139	356	585	20	-148	139	900	271	-11	-28
140	381	650	-89	113	140	119	628	15	37	140	487	647	43	56	140	508	569	24	89	140	337	495	-220	-50	140	394	601	170	-76	140	298	328	-213	-92	140	407	74	-54	-327	140	356	585	20	-148	140	894	273	-17	-26
141	380	652	-90	115	141	120	629	16	38	141	483	648	39	57	141	508	571	24	91	141	335	489	-222	-56	141	397	600	173	-77	141	310	335	-201	-85	141	404	75	-57	-326	141	361	585	25	-148	141	899	280	-12	-19
142	379	652	-91	115	142	118	632	14	41	142	481	647	37	56	142	507	573	23	93	142	335	478	-222	-67	142	399	599	175	-78	142	314	330	-197	-90	142	404	71	-57	-330	142	363	585	27	-148	142	902	287	-9	-12
143	378	652	-92	115	143	119	632	15	41	143	477	647	33	56	143	506	572	22	92	143	335	475	-222	-70	143	401	597	177	-80	143	318	330	-193	-90	143	404	65	-57	-336	143	363	585	27	-148	143	902	291	-9	-8
144	376	654	-94	117	144	117	633	13	42	144	471	645	27	54	144	507	571	23	91	144	334	472	-223	-73	144	402	595	178	-82	144	318	329	-193	-91	144	404	61	-57	-340	144	365	585	29	-148	144	912	282	1	-17
145	375	654	-95	117	145	117	634	13	43	145	467	644	23	53	145	509	575	25	95	145	315	460	-242	-85	145	403	594	179	-83	145	317	329	-194	-91	145	401	62	-60	-339	145	368	586	32	-147	145	916	284	5	-15
146	373	655	-97	118	146	118	636	14	45	146	465	643	21	52	146	508	573	24	93	146	317	460	-240	-85	146	404	593	180	-84	146	314	329	-197	-91	146	397	64	-64	-337	146	368	586	32	-147	146	927	285	16	-14
147	373	653	-97	116	147	117	637	13	46	147	464	642	20	51	147	513	576	29	96	147	316	458	-241	-87	147	405	592	181	-85	147	317	340	-194	-80	147	396	65	-65	-336	147	370	585	34	-148	147	928	284	17	-15
148	372	654	-98	117	148	116	638	12	47	148	461	641	17	50	148	507	573	23	93	148	318	457	-239	-88	148	406	591	182	-86	148	317	340	-194	-80	148	396	69	-65	-332	148	372	584	36	-149	148	939	284	28	-15
149	371	653	-99	116	149	114	640	10	49	149	458	640	14	49	149	508	573	24	93	149	319	455	-238	-90	149	407	589	183	-88	149	318	338	-193	-82	149	395	71	-66	-330	149	372	581	36	-152	149	939	281	28	-18
150	371	651	-99	114	150	112	642	8	51	150	456	638	12	47	150	511	578	27	98	150	311	451	-246	-94	150	409	588	185	-89	150	318	335	-193	-85	150	395	71	-66	-330	150	370	579	34	-154	150	942	285	31	-14
151	370	652	-100	115	151	110	644	6	53	151	456	637	12	46	151	513	577	29	97	151	312	451	-245	-94	151	411	588	187	-89	151	319	332	-192	-88	151	398	74	-63	-327	151	361	576	25	-157	151	944	295	33	-4
152	370	651	-100	114	152	110	644	6	53	152	457	637	13	46	152	512	577	28	97	152	311	452	-246	-93	152	412	587	188	-90	152	319	333	-192	-87	152	400	78	-61	-323	152	347	571	11	-162	152	944	300	33	1
153	337	630	-133	93	153	109	645	5	54	153	458	636	14	45	153	510	577	26	97	153	312	453	-245	-92	153	413	587	189	-90	153	319	336	-192	-84	153	402	83	-59	-318	153	338	562	2	-171	153	941	291	30	-8
154	359	642	-111	105	154	109	646	5	55	154	459	633	15	42	154	507	579	23	99	154	310	448	-247	-97	154	414	586	190	-91	154	320	339	-191	-81	154	402	86	-59	-315	154	334	546	-2	-187	154	935	290	24	-9
155	360	642	-110	105	155	108	648	4	57	155	456	633	12	42	155	502	583	18	103	155	310	442	-247	-103	155	415	584	191	-93	155	323	340	-188	-80	155	400	90	-61	-311	155	346	545	10	-188	155	928	290	17	-9
156	358	642	-112	105	156	110	649	6	58	156	455	631	11	40	156	503	585	19	105	156	312	441	-245	-104	156	414	582	190	-95	156	324	340	-187	-80	156	396	93	-65	-308	156	346	545	10	-188	156	927	291	16	-8
157	358	639	-112	102	157	109	650	5	59	157	455	631	11	40	157	503	585	19	105	157	312	442	-245	-103	157	414	580	190	-97	157	323	339	-188	-81	157	391	93	-70	-308	157	351	543	15	-190	157	927	294	16	-5
158	357	637	-113	100	158	108	652	4	61	158	456	632	12	41	158	501	589	17	109	158	308	445	-249	-100	158	414	578	190	-99	158	323	339	-188	-81	158	389	93	-72	-308	158	355	543	19	-190	158	927	287	16	-12
159	355	637	-115	100	159	108	653	4	62	159	456	632	12	41	159	497	591	13	111	159	303	453	-254	-92	159	415	574	191	-103	159	319	342	-192	-78	159	387	94	-74	-307	159	364	542	28	-191	159	936	287	25	-12
160	352	637	-118	100	160	107	655	3	64	160	457	631	13	40	160	494	594	10	114	160	304	456	-253	-89	160	415	572	191	-105	160	316	350	-195	-70	160	389	97	-72	-304	160	368	542	32	-191	160	939	282	28	-17
161	351	636	-119	99	161	107	657	3	66	161	456	633	12	42	161	491	599	7	119	161	309	462	-248	-83	161	415	570	191	-107	161	316	352	-195	-68	161	393	98	-68	-303	161	373	542	37	-191	161	941	282	30	-17
162	351	637	-119	100	162	106	659	2	68	162	456	632	12	41	162	491	603	7	123	162	307	468	-250	-77	162	414	566	190	-111	162	316	356	-195	-64	162	396	98	-65	-303	162	386	543	50	-190	162	936	282	25	-17
163	351	637	-119	100	163	106	660	2	69	163	457	632	13	41	163	494	604	10	124	163	305	472	-252	-73	163	414	563	190	-114	163	314	359	-197	-61	163	398	99	-63	-302	163	389	545	53	-188	163	958	291	47	-8
164	351	638	-119	101	164	106	661	2	70	164	457	632	13	41	164	498	605	14	125	164	308	477	-249	-68	164	414	561	190	-116	164	318	365	-193	-55	164	395	99	-66	-302	164	389	547	53	-186	164	960	293	49	-6
165	351	643	-119	106	165	107	661	3	70	165	458	632	14	41	165	497	608	13	128	165	310	480	-247	-65	165	414	558	190	-119	165	332	381	-179	-39	165	396	99	-65	-302	165	389	550	53	-183	165	960	295	49	-4
166	348	643	-122	106	166	105	663	1	72	166	457	635	13	44	166	499	612	15	132	166	317	484	-240	-61	166	412	556	188	-121	166	326	372	-185	-48	166	393	101	-68	-300	166	386	554	50	-179	166	960	296	49	-3
167	346	643	-124	106	167	105	665	1	74	167	456	633	12	42	167	499	610	15	130	167	324	483	-233	-62	167	410	554	186	-123	167	325	371	-186	-49	167	390	103	-71	-298	167	386	555	50	-178	167	964	295	53	-4
168	346	643	-124	106	168	105	664	1	73	168	450	635	6	44	168	498	608	14	128	168	326	484	-231	-61	168	410	553	186	-124	168	322	371	-189	-49	168	388	103	-73	-298	168	386	555	50	-178	168	964	293	53	-6
169	345	644	-125	107	169	105	665	1	74	169	449	635	5	44	169	498	601	14	121	169	333	482	-224	-63	169	410	551	186	-126	169	318	370	-193	-50	169	389	101	-72	-300	169	389	555	53	-178	169	961	293	50	-6
170	342	646	-128	109	170	103	665	-1	74	170	449	635	5	44	170	500	599	16	119	170	336	484	-221	-61	170	409	549	185	-128	170	318	370	-193	-50	170	390	99	-71	-302	170	391	551	55	-182	170	961	296	50	-3
171	341	647	-129	110	171	102	665	-2	74	171	449	635	5	44	171	500	602	16	122	171	337	489	-220	-56	171	407	547	183	-130	171	318	372	-193	-48	171	389	100	-72	-301	171	394	551	58	-182	171	963	296	52	-3
172	340	647	-130	110	172	102	666	-2	75	172	451	634	7	43	172	498	604	14	124	172	338	494	-219	-51	172	404	546	180	-131	172	317	371	-194	-49	172	388	99	-73	-302	172	395	551	59	-182	172	964	296	53	-3
173	339	646	-131	109	173	102	667	-2	76	173	452	634	8	43	173	497	605	13	125	173	340	498	-217	-47	173	402	545	178	-132	173	313	369	-198	-51	173	387	99	-74	-302	173	403	551	67	-182	173	965	296	54	-3
174	339	646	-131	109	174	104	668	0	77	174	451	631	7	40	174	492	594	8	114	174	341	476	-216	-69	174	401	543	177	-134	174	313	366	-198	-54	174	387	99	-74	-302	174	401	551	65	-182	174	956	294	45	-5
175	340	648	-130	111	175	131	667	27	76	175	452	629	8	38	175	495	600	11	120	175	339	475	-218	-70	175	399	543	175	-134	175	318	360	-193	-60	175	387	99	-74	-302	175	401	551	65	-182	175	955	287	44	-12
176	340	648	-130	111	176	128	667	24	76	176	453	629	9	38	176	497	605	13	125	176	341	474	-216	-71	176	398	542	174	-135	176	318	359	-193	-61	176	385	100	-76	-301	176	406	551	70	-182	176	955	279	44	-20
177	339	648	-131	111	177	129	667	25	76	177	452	627	8	36	177	499	607	15	127	177	338	473	-219	-72	177	397	540	173	-137	177	313	359	-198	-61	177	382	101	-79	-300	177	407	551	71	-182	177	951	279	40	-20
178	339	645	-131	108	178	129	667	25	76	178	454	626	10	35	178	498	607	14	127	178	338	474	-219	-71	178	394	539	170	-138	178	313	360	-198	-60	178	377	104	-84	-297	178	407	551	71	-182	178	955	290	44	-9
179	337	643	-133	106	179	129	668	25	77	179	455	626	11	35	179	499	607	15	127	179	339	474	-218	-71	179	392	538	168	-139	179	313	362	-198	-58	179	376	107	-85	-294	179	408	551	72	-182	179	955	289	44	-10
180	336	640	-134	103	180	130	668	26	77	180	456	625	12	34	180	499	608	15	128	180	339	474	-218	-71	180	391	539	167	-138	180	314	363	-197	-57	180	372	113	-89	-288	180	408	551	72	-182	180	953	286	42	-13
181	335	639	-135	102	181	130	671	26	80	181	456	624	12	33	181	501	611	17	131	181	342	475	-215	-70	181	390	538	166	-139	181	317	364	-194	-56	181	368	116	-93	-285	181	410	551	74	-182	181	947	294	36	-5
182	333	639	-137	102	182	131	673	27	82	182	456	623	12	32	182	498	611	14	131	182	339	476	-218	-69	182	388	538	164	-139	182	316	364	-195	-56	182	365	117	-96	-284	182	412	554	76	-179	182	947	298	36	-1
183	332	639	-138	102	183	131	672	27	81	183	457	625	13	34	183	497	610	13	130	183	331	475	-226	-70	183	387	538	163	-139	183	312	367	-199	-53	183	360	120	-101	-281	183	412	555	76	-178	183	946	305	35	6
184	331	639	-139	102	184	132	675	28	84	184	457	625	13	34	184	487	611	3	131	184	329	474	-228	-71	184	387	537	163	-140	184	311	369	-200	-51	184	351	122	-110	-279	184	419	558	83	-175	184	942	309	31	10
185	329	641	-141	104	185	133	674	29	83	185	458	627	14	36	185	487	611	3	131	185	326	477	-231	-68	185	386	537	162	-140	185	305	372	-206	-48	185	340	120	-121	-281	185	418	555	82	-178	185	960	319	49	20
186	328	640	-142	103	186	132	675	28	84	186	460	625	16	34	186	488	611	4	131	186	323	476	-234	-69	186	385	536	161	-141	186	305	373	-206	-47	186	336	116	-125	-285	186	420	552	84	-181	186	967	317	56	18
187	327	640	-143	103	187	131	676	27	85	187	460	624	16	33	187	490	610	6	130	187	323	475	-234	-70	187	383	535	159	-142	187	304	373	-207	-47	187	338	110	-123	-291	187	421	552	85	-181	187	973	314	62	15
188	326	641	-144	104	188	133	681	29	90	188	460	623	16	32	188	491	609	7	129	188	322	470	-235	-75	188	381	534	157	-143	188	301	377	-210	-43	188	339	116	-122	-285	188	423	552	87	-181	188	973	310	62	11
189	324	640	-146	103	189	135	682	31	91	189	461	622	17	31	189	495	605	11	125	189	322	467	-235	-78	189	380	533	156	-144	189	296	377	-215	-43	189	340	119	-121	-282	189	424	554	88	-179	189	955	315	44	16
190	324	636	-146	99	190	134	680	30	89	190	462	622	18	31	190	500	604	16	124	190	322	467	-235	-78	190	378	532	154	-145	190	293	378	-218	-42	190	341	122	-120	-279	190	424	555	88	-178	190	953	317	42	18
191	323	637	-147	100	191	133	681	29	90	191	464	620	20	29	191	503	605	19	125	191	324	465	-233	-80	191	377	531	153	-146	191	304	378	-207	-42	191	343	119	-118	-282	191	423	560	87	-173	191	946	318	35	19
192	323	635	-147	98	192	135	685	31	94	192	464	620	20	29	192	503	607	19	127	192	323	463	-234	-82	192	372	532	148	-145	192	310	378	-201	-42	192	344	118	-117	-283	192	420	563	84	-170	192	942	309	31	10
193	322	635	-148	98	193	134	683	30	92	193	465	619	21	28	193	504	607	20	127	193	323	462	-234	-83	193	368	531	144	-146	193	310	379	-201	-41	193	341	120	-120	-281	193	420	566	84	-167	193	940	313	29	14
194	322	633	-148	96	194	133	683	29	92	194	464	620	20	29	194	504	607	20	127	194	325	459	-232	-86	194	364	532	140	-145	194	312	382	-199	-38	194	343	121	-118	-280	194	419	569	83	-164	194	941	318	30	19
195	321	634	-149	97	195	136	687	32	96	195	464	621	20	30	195	504	608	20	128	195	324	459	-233	-86	195	360	530	136	-147	195	312	383	-199	-37	195	344	122	-117	-279	195	418	573	82	-160	195	939	321	28	22
196	321	635	-149	98	196	135	688	31	97	196	464	622	20	31	196	505	610	21	130	196	323	459	-234	-86	196	356	530	132	-147	196	314	384	-197	-36	196	346	119	-115	-282	196	418	573	82	-160	196	935	314	24	15
197	320	636	-150	99	197	134	687	30	96	197	464	622	20	31	197	506	610	22	130	197	319	461	-238	-84	197	352	530	128	-147	197	317	385	-194	-35	197	346	117	-115	-284	197	416	573	80	-160	197	933	307	22	8
198	319	636	-151	99	198	136	688	32	97	198	463	621	19	30	198	517	598	33	118	198	318	462	-239	-83	198	348	530	124	-147	198	325	389	-186	-31	198	345	113	-116	-288	198	416	573	80	-160	198	931	299	20	0
199	318	637	-152	100	199	137	687	33	96	199	464	620	20	29	199	517	599	33	119	199	316	464	-241	-81	199	345	530	121	-147	199	332	390	-179	-30	199	347	107	-114	-294	199	416	572	80	-161	199	926	293	15	-6
200	318	636	-152	99	200	137	687	33	96	200	462	619	18	28	200	517	600	33	120	200	315	466	-242	-79	200	343	528	119	-149	200	332	391	-179	-29	200	346	103	-115	-298	200	416	569	80	-164	200	927	289	16	-10
[truncated: 115 more columns]
