# Supplementary material for: Spatiotemporal dynamics of PIEZO1 localization controls keratinocyte migration during wound healing
Source: eLife journal article supplement (doi:10.7554/elife.65415), 2021-09-27
Supplement: fig2-figsupp3-data1 [file elife-65415-fig2-figsupp3-data1-v2.xlsx]

## Sheet: SuppFig6A-Con(GoF) Trajectori
Plotted Trajectories for Supp Fig 5 and 6A Relative X and Relative Y are seen plotted for each trajectory
	Cell 1		Cell 2		Cell 3		Cell 4		Cell 5		Cell 6		Cell 7		Cell 8		Cell 9		Cell 10		Cell 11		Cell 12		Cell 13		Cell 14		Cell 15		Cell 16		Cell 17		Cell 18		Cell 19		Cell 20		Cell 21		Cell 22		Cell 23		Cell 24		Cell 25
Frame	relative X	relative Y	relative X	relative Y	relative X	relative Y	relative X	relative Y	relative X	relative Y	relative X	relative Y	relative X	relative Y	relative X	relative Y	relative X	relative Y	relative X	relative Y	relative X	relative Y	relative X	relative Y	relative X	relative Y	relative X	relative Y	relative X	relative Y	relative X	relative Y	relative X	relative Y	relative X	relative Y	relative X	relative Y	relative X	relative Y	relative X	relative Y	relative X	relative Y	relative X	relative Y	relative X	relative Y	relative X
1			0	0	0	0	0	0	0	0	0	0	0	0	0	0	0	0	0	0	0	0	0	0	0	0	0	0	0	0	0	0	0	0	0	0	0	0	0	0	0	0	0	0	0	0	0	0	0
2	0	0	-1	1	-5	8	-5	0	-1	-1	-7	-9	1	3	3	-3	1	1	-4	-7	5	0	6	-5	-6	0	1	0	4	9	-5	5	0	11	2	-4	-11	-4	13	-3	8	-3	-3	-5	10	3	0	3	7
3	6	-11	1	0	-11	14	-7	1	-3	-4	-11	-17	1	5	6	-1	0	0	-13	-15	6	-2	9	-4	-6	0	2	-1	8	17	-13	8	-17	11	-2	-5	-17	-10	24	-2	11	0	-8	-11	16	6	-12	5	8
4	11	-19	6	-3	-18	21	-9	2	-5	-8	-10	-25	0	8	5	0	0	0	-27	-19	6	1	10	-4	-17	0	2	0	13	23	-16	15	-17	11	-21	-1	-24	-15	31	-3	17	4	-13	-17	22	7	-5	10	9
5	11	-29	15	-6	-21	26	-10	3	-6	-11	-9	-34	2	10	5	-1	-1	1	-37	-23	3	6	13	-3	-28	0	3	-1	25	26	-19	20	-17	11	-35	4	-18	-19	37	-3	20	17	-18	-20	27	8	-3	16	12
6	11	-39	16	-12	-26	29	-11	7	-7	-12	-9	-41	6	11	9	-3	-1	2	-45	-26	5	7	16	-6	-51	-5	6	-1	35	30	-27	24	-28	11	-51	-6	-36	-26	43	-4	24	20	-25	-23	32	9	-4	23	21
7	11	-49	14	-18	-31	36	-14	5	-6	-14	-6	-46	5	13	9	-2	0	2	-58	-24	7	6	19	-6	-68	-5	6	0	45	31	-29	28	-28	11	-60	-9	-35	-29	46	-7	27	32	-34	-27	37	9	-8	28	32
8	10	-55	14	-27	-35	43	-15	4	-4	-15	-3	-53	7	15	10	1	-1	1	-70	-25	7	7	22	-7	-79	12	7	2	53	31	-28	38	-28	11	-61	-17	-47	-36	50	-8	35	35	-45	-26	42	9	-3	36	51
9	13	-57	6	-35	-38	50	-2	-2	-1	-16	0	-59	8	17	10	1	-1	1	-82	-23	8	9	22	-6	-85	12	10	3	65	31	-31	47	-39	11	-57	-38	-55	-43	54	-10	47	42	-57	-21	49	8	-3	41	65
10	25	-64	6	-40	-43	55	4	-2	1	-17	1	-63	13	17	13	2	-1	1	-93	-24	9	10	22	-6	-79	17	12	3	73	35	-34	52	-34	6	-73	-57	-61	-44	58	-11	65	48	-66	-12	55	5	-1	46	78
11	30	-71	6	-41	-46	60	6	1	2	-15	5	-69	19	18	15	0	-1	2	-95	-30	4	8	27	-8	-85	17	16	4	81	43	-39	62	-39	6	-91	-75	-70	-47	65	-13	79	54	-66	-4	60	2	0	52	89
12	27	-81	6	-43	-52	61	5	3	3	-15	10	-79	25	17	17	1	-4	3	-98	-31	-5	6	27	-7	-97	17	18	5	86	52	-45	65	-45	6	-97	-90	-78	-60	72	-13	86	64	-62	2	68	-10	2	58	99
13	19	-91	0	-59	-59	58	7	5	9	-15	15	-85	29	16	15	2	-4	4	-101	-23	-10	20	29	-6	-102	17	21	4	90	58	-50	68	-45	6	-99	-104	-86	-65	75	-19	93	70	-60	12	70	-16	2	64	105
14	16	-94	3	-52	-66	54	7	9	13	-13	21	-89	35	11	18	3	-7	6	-98	-26	-9	23	30	-3	-114	17	20	6	91	65	-54	73	-51	6	-101	-116	-94	-65	76	-26	96	84	-54	20	70	-27	3	69	120
15	9	-98	6	-47	-69	49	3	12	16	-13	24	-89	38	9	18	1	-8	6	-97	-16	-12	21	30	-5	-125	17	23	6	92	74	-53	87	-51	6	-105	-124	-108	-65	78	-32	92	101	-49	28	64	-41	-2	73	128
16	9	-101	7	-44	-69	46	1	15	18	-11	26	-85	42	8	20	1	-8	6	-90	-11	-13	18	33	-3	-131	17	25	7	94	81	-51	96	-51	6	-111	-134	-117	-66	80	-38	99	109	-41	31	60	-48	-9	77	124
17	9	-102	13	-48	-70	40	0	16	21	-9	33	-79	46	6	20	4	-7	6	-84	-7	-16	18	34	-2	-142	12	28	9	96	86	-59	99	-56	6	-119	-154	-121	-67	79	-43	107	120	-37	36	56	-54	-16	80	118
18	13	-104	15	-46	-68	31	1	16	22	-7	35	-72	47	1	21	6	-7	6	-75	8	-19	19	35	-1	-148	12	30	10	98	91	-70	103	-62	6	-127	-171	-127	-64	76	-48	113	132	-27	35	48	-60	-20	83	107
19	17	-98	10	-43	-67	23	1	16	24	-5	37	-64	49	-1	21	7	-6	6	-57	12	-27	-5	34	-1	-159	12	30	9	97	99	-75	108	-62	0	-136	-181	-125	-63	78	-53	115	143	-17	33	44	-65	-25	87	91
20	21	-86	9	-42	-64	16	5	15	24	-2	36	-60	50	-3	21	7	-5	5	-44	20	-35	-8	37	-1	-159	12	31	7	98	106	-73	115	-73	11	-152	-189	-126	-62	83	-58	124	152	-4	23	36	-71	-46	86	75
21	22	-76	9	-32	-62	15	9	16	24	1	33	-55	52	-5	22	7	-2	5	-35	26	-45	-9	41	2	-159	0	34	8	102	111	-73	124	-73	11	-167	-194	-124	-60	87	-64	134	157	6	5	31	-75	-52	89	63
22	25	-65	8	-27	-60	16	11	16	23	4	16	-42	52	-9	23	9	1	3	-25	28	-54	-9	42	3	-170	-5	33	8	106	117	-73	129	-79	11	-189	-199	-123	-60	87	-69	147	165	16	-3	24	-79	-60	90	45
23	29	-50	4	-23	-58	17	22	7	22	5	9	-34	50	-15	23	10	1	0	-11	27	-63	-2	43	9	-170	-22	32	10	110	123	-75	136	-85	11	-212	-206	-112	-59	91	-73	160	178	25	-4	16	-81	-65	90	31
24	26	-39	3	-17	-54	19	31	5	19	7	2	-29	47	-21	23	10	0	-4	10	22	-80	-24	46	9	-165	-34	32	10	109	130	-77	144	-96	11	-227	-209	-102	-52	95	-77	169	183	36	-4	7	-81	-67	93	12
25	22	-28	3	-12	-53	21	38	3	17	7	-4	-25	44	-26	24	12	-3	-8	25	22	-91	-30	44	11	-165	-34	33	10	110	138	-71	151	-102	17	-248	-217	-89	-42	99	-81	185	181	44	-5	-2	-79	-70	95	-4
26	22	-23	3	-1	-52	24	41	4	15	8	-8	-14	42	-30	26	11	-4	-11	38	17	-90	0	48	13	-165	-39	35	10	114	144	-72	156	-102	17	-266	-223	-77	-35	101	-87	195	190	52	-8	-8	-78	-72	98	-16
27	21	-21	4	12	-49	31	42	2	13	6	-15	-8	40	-33	23	11	-5	-13	43	10	-66	26	50	13	-170	-45	35	10	117	150	-67	163	-107	17	-281	-218	-67	-31	103	-91	207	206	61	-6	-13	-81	-76	100	-30
28	18	-12	6	24	-45	41	45	0	9	4	-20	2	37	-35	26	15	-5	-15	42	-7	-57	38	50	14	-170	-45	36	9	118	158	-66	169	-102	17	-297	-221	-61	-27	103	-99	217	220	70	1	-20	-84	-79	104	-42
29	18	3	8	28	-41	52	47	-1	7	1	-27	10	33	-36	27	13	-4	-15	37	-24	-59	46	54	16	-182	-45	37	8	120	165	-61	176	-107	17	-314	-224	-55	-19	100	-107	224	231	78	9	-24	-89	-81	106	-47
30	21	11	7	33	-38	59	53	4	5	-1	-30	21	32	-39	29	13	-3	-14	34	-35	-57	54	52	19	-204	-62	38	9	123	171	-56	185	-107	28	-326	-222	-41	-16	95	-113	234	238	86	12	-28	-94	-56	119	-38
31	24	18	7	32	-33	68	56	7	4	-4	-33	30	32	-41	30	13	-1	-10	28	-46	-54	63	55	20	-204	-62	41	9	124	176	-49	193	-125	28	-335	-215	-30	-20	89	-119	247	245	95	13	-29	-99	-57	123	-37
32	26	26	12	34	-29	73	57	10	3	-6	-29	37	30	-43	31	15	-3	-6	7	-64	-52	67	56	19	-221	-62	41	11	126	180	-49	200	-125	28	-347	-203	-21	-32	83	-126	257	257	102	15	-30	-107	-56	127	-22
33	28	39	19	38	-28	76	60	12	3	-8	-23	45	26	-45	35	14	-4	0	-10	-70	-68	55	55	23	-233	-62	43	10	128	184	-55	209	-130	28	-357	-185	-12	-39	83	-132	260	266	106	14	-35	-113	-55	132	-9
34	30	46	18	44	-30	79	60	16	3	-9	-10	53	22	-46	36	14	-7	3	-18	-86	-50	68	56	25	-239	-51	44	7	129	189	-60	217	-136	45	-364	-168	-10	-44	83	-138	259	278	109	6	-42	-119	-51	138	-1
35	34	55	19	50	-26	79	61	19	3	-10	1	51	18	-45	38	13	-9	8	-24	-97	-51	71	58	27	-239	-45	47	8	131	194	-58	222	-142	45	-361	-155	-3	-50	85	-144	262	292	111	-2	-48	-125	-48	144	11
36	37	62	18	51	-20	77	61	21	3	-10	11	51	14	-45	41	15	-10	11	-34	-99	-51	78	61	28	-250	-62	50	9	137	199	-59	225	-142	40	-358	-143	0	-52	91	-151	267	305	108	-14	-53	-130	-45	150	20
37	42	64	24	50	-15	74	57	22	3	-11	16	47	11	-44	42	16	-9	15	-44	-98	-63	69	64	30	-250	-51	52	9	146	203	-62	227	-136	40	-347	-128	3	-57	92	-157	267	314	100	-18	-60	-138	-44	156	28
38	45	63	27	53	-8	74	49	17	4	-12	19	43	9	-45	47	17	-9	23	-52	-105	-61	69	68	31	-256	-74	52	8	152	208	-72	237	-142	40	-334	-117	4	-61	91	-162	276	324	106	-26	-66	-145	-43	159	45
39	44	64	29	50	0	71	39	24	5	-12	12	34	6	-44	51	16	-11	33	-61	-107	-61	72	69	34	-267	-79	54	6	158	213	-72	248	-153	40	-323	-110	2	-65	89	-166	284	333	108	-33	-72	-151	-40	161	55
40	40	63	31	50	6	68	31	25	5	-13	4	30	4	-45	56	15	-10	38	-72	-92	-59	76	71	34	-267	-91	53	7	163	215	-72	259	-153	51	-318	-105	-3	-75	86	-168	288	341	113	-39	-79	-156	-37	162	66
41	28	53	35	51	13	72	26	26	6	-12	-6	26	2	-44	57	17	-10	40	-75	-95	-69	73	73	37	-278	-91	51	9	167	219	-70	270	-159	51	-310	-103	-12	-79	78	-166	304	347	112	-45	-88	-162	-34	165	82
42	17	44	45	50	13	71	20	27	8	-11	-15	21	-1	-43	62	15	-9	39	-78	-83	-82	74	71	38	-290	-85	50	11	171	223	-62	276	-159	51	-295	-108	-21	-82	72	-165	319	350	111	-50	-94	-167	-31	170	91
43	7	34	53	52	12	66	13	26	10	-10	-24	18	-2	-43	65	14	-8	40	-82	-57	-76	76	76	38	-290	-91	49	13	175	228	-56	283	-164	51	-284	-113	-23	-89	69	-163	328	354	115	-50	-101	-170	-30	173	97
44	0	31	63	57	16	60	7	22	11	-7	-30	14	-4	-43	66	13	-7	37	-74	-33	-57	75	78	40	-307	-74	49	12	178	234	-46	289	-164	51	-278	-128	-20	-99	69	-143	338	353	121	-49	-111	-172	-31	176	102
45	-6	27	72	54	20	56	1	21	12	-4	-38	5	-5	-43	69	12	-6	36	-71	-14	-46	81	79	44	-312	-74	49	15	183	238	-38	293	-170	51	-280	-146	-14	-102	67	-141	347	354	129	-46	-119	-177	-33	179	107
46	-13	23	78	59	23	56	-4	17	13	-1	-42	-7	-7	-42	72	10	-5	33	-59	-1	-38	86	81	44	-312	-74	48	18	185	244	-33	301	-170	57	-295	-157	-6	-99	62	-144	358	354	135	-50	-123	-181	-29	182	109
47	-22	19	84	65	20	59	-8	15	15	0	-45	-17	-9	-41	74	10	-7	32	-66	15	-31	91	84	45	-312	-74	48	21	190	251	-26	307	-176	57	-311	-163	0	-81	53	-168	369	356	140	-51	-132	-186	-9	185	99
48	-28	15	91	66	17	59	-14	13	17	1	-47	-25	-12	-38	78	10	-9	30	-72	26	-26	90	85	47	-324	-62	49	19	193	257	-23	315	-181	57	-322	-168	-5	-67	43	-179	376	357	142	-48	-140	-189	-4	195	92
49	-34	11	95	70	16	60	-19	9	17	2	-47	-34	-14	-36	83	9	-14	31	-73	37	-13	86	84	51	-335	-62	50	21	196	262	-25	321	-187	68	-332	-162	-10	-58	36	-185	385	357	141	-48	-147	-191	-4	205	85
50	-38	3	98	71	2	64	-24	6	18	3	-52	-40	-15	-35	87	10	-17	30	-77	45	-18	80	86	54	-341	-62	54	19	200	266	-33	330	-187	68	-350	-152	-12	-51	32	-188	395	359	140	-48	-153	-196	-1	209	89
51	-41	-3	101	71	-8	66	-29	0	17	7	-55	-45	-15	-33	91	8	-23	30	-83	52	-23	75	87	57	-346	-62	59	20	206	271	-40	342	-193	74	-356	-147	-12	-48	32	-193	405	366	135	-46	-160	-200	0	215	87
52	-46	-7	107	73	-17	69	-34	-1	14	10	-58	-49	-16	-30	91	8	-26	30	-90	59	-26	73	89	59	-341	-45	64	21	212	273	-40	350	-193	79	-358	-148	-13	-43	30	-198	411	377	126	-37	-167	-202	-3	227	83
53	-52	-10	110	75	-25	72	-36	-3	13	12	-59	-49	-16	-28	93	9	-27	30	-91	65	-26	68	90	62	-352	-45	66	23	219	274	-40	355	-198	85	-354	-174	-20	-44	27	-203	418	383	120	-28	-174	-203	-12	245	87
54	-53	-13	111	82	-33	71	-37	-7	11	14	-60	-46	-16	-24	96	7	-28	31	-89	74	-28	62	91	64	-352	-39	69	25	226	273	-38	362	-198	85	-342	-195	-33	-47	23	-205	420	396	113	-20	-182	-205	-9	256	88
55	-52	-19	112	84	-34	72	-39	-12	10	16	-66	-40	-17	-21	101	6	-28	35	-73	90	-28	53	93	64	-358	-39	70	29	235	271	-31	371	-198	85	-337	-213	-44	-45	19	-207	428	400	103	-12	-192	-207	-7	264	88
56	-47	-22	114	87	-33	72	-41	-14	9	18	-71	-40	-18	-19	106	3	-29	40	-59	104	-25	41	96	67	-369	-39	69	31	240	273	-24	379	-193	96	-331	-223	-51	-45	16	-209	434	406	91	-1	-199	-210	2	272	90
57	-41	-26	114	87	-37	66	-41	-17	8	18	-76	-41	-17	-16	109	3	-30	46	-44	111	-14	26	99	68	-375	-39	70	31	244	273	-16	384	-193	96	-318	-226	-61	-45	10	-209	437	412	83	8	-207	-211	15	278	92
58	-34	-27	115	89	-40	60	-44	-18	9	19	-85	-46	-17	-15	111	2	-29	50	-38	119	0	14	99	71	-392	-39	73	32	249	273	-9	386	-204	96	-302	-223	-67	-40	4	-204	440	414	58	-4	-216	-214	24	283	93
59	-30	-26	116	89	-42	52	-43	-21	9	19	-91	-50	-16	-14	116	-2	-27	51	-25	119	13	14	105	71	-386	-34	74	30	256	273	0	385	-210	96	-294	-219	-71	-31	-4	-196	442	419	47	-4	-223	-214	30	288	97
60	-28	-21	120	88	-45	45	-44	-20	10	19	-93	-55	-14	-11	119	-4	-25	50	-12	117	26	7	109	74	-392	-22	76	29	263	274	8	381	-198	108	-286	-223	-71	-18	-9	-190	445	424	42	-2	-231	-211	36	288	101
61	-22	-15	123	86	-48	39	-43	-18	10	20	-106	-49	-15	-9	123	-3	-23	48	-5	123	40	-6	113	75	-386	-11	76	31	272	275	10	382	-204	108	-277	-226	-64	-9	-12	-181	448	430	40	2	-239	-213	43	286	106
62	-13	-10	126	83	-49	34	-38	-21	10	19	-115	-55	-14	-6	129	-1	-25	48	4	122	51	-17	118	78	-398	-11	78	32	279	278	21	366	-204	119	-280	-243	-59	-8	-9	-175	452	436	39	4	-247	-222	49	283	108
63	-2	-3	133	85	-53	32	-33	-24	10	19	-119	-59	-13	-5	130	-2	-28	45	13	119	55	-31	116	80	-403	-11	81	37	286	276	29	359	-204	119	-278	-237	-57	-8	-6	-168	454	445	38	10	-253	-228	51	281	111
64	11	0	138	83	-62	31	-28	-25	10	16	-123	-67	-13	-3	133	-5	-31	38	26	112	57	-42	119	84	-403	0	84	40	290	276	37	353	-210	119	-276	-235	-57	-11	-6	-166	451	459	36	17	-262	-230	53	276	112
65	19	5	141	84	-66	26	-26	-27	9	12	-127	-74	-13	-1	136	-6	-36	34	42	111	58	-64	118	88	-409	0	89	40	291	278	45	352	-210	119	-277	-236	-60	-18	-4	-164	449	465	56	50	-271	-230	54	267	109
66	27	9	141	86	-69	23	-28	-22	10	11	-132	-80	-13	1	138	-8	-38	31	55	112	67	-80	121	88	-420	0	92	33	297	274	53	358	-221	125	-277	-235	-59	-27	-4	-161	449	469	56	58	-277	-230	57	254	107
67	34	13	140	87	-74	22	-31	-19	12	9	-137	-85	-11	3	142	-5	-42	29	66	110	75	-86	123	90	-420	-11	91	23	303	273	60	363	-221	130	-295	-232	-60	-36	1	-158	444	474	57	67	-283	-230	57	245	103
68	41	15	140	88	-79	22	-32	-17	13	7	-144	-89	-7	5	149	-6	-44	29	72	114	80	-84	125	92	-420	-5	93	12	309	273	66	366	-221	130	-315	-235	-56	-44	10	-154	425	471	58	72	-288	-230	57	241	99
69	48	20	140	88	-81	22	-37	-5	13	5	-147	-93	-3	6	150	-6	-46	26	79	128	83	-89	127	94	-426	-5	96	17	314	272	70	369	-215	130	-326	-234	-51	-47	22	-153	415	455	60	77	-294	-228	62	227	95
70	50	35	142	91	-83	23	-47	12	14	3	-149	-97	0	7	156	-5	-47	24	85	144	84	-92	129	96	-426	-11	99	17	320	274	72	372	-215	136	-335	-233	-42	-53	31	-153	415	445	49	82	-300	-223	58	222	88
71	52	47	144	94	-83	27	-48	13	15	3	-152	-99	3	9	161	-6	-50	24	95	152	91	-92	131	98	-432	-11	101	11	326	275	73	388	-215	148	-334	-239	-43	-58	40	-157	415	437	34	83	-305	-219	46	220	80
72	55	57	147	95	-83	30	-47	10	16	1	-156	-105	3	9	165	-5	-54	21	103	159	94	-86	132	100	-432	0	101	4	329	275	74	396	-227	148	-336	-235	-53	-66	47	-166	416	429	26	89	-311	-214	33	218	72
73	45	64	151	99	-85	33	-23	-5	18	1	-161	-110	5	10	168	-6	-56	17	102	173	91	-74	132	101	-432	0	93	-3	333	280	74	401	-227	148	-340	-224	-56	-74	53	-175	416	423	18	94	-317	-206	10	226	68
74	33	71	152	103	-85	33	-15	-14	20	0	-166	-113	5	11	169	-5	-57	13	102	182	81	-55	135	102	-449	17	100	-11	337	276	79	401	-232	148	-339	-210	-53	-81	55	-186	411	418	13	96	-322	-201	-21	248	66
75	30	79	154	106	-83	30	-10	-3	21	-1	-168	-116	6	10	173	-4	-58	10	112	185	58	-80	138	105	-449	17	82	-10	342	276	83	399	-232	153	-338	-205	-53	-89	50	-200	408	414	13	103	-324	-196	-24	247	62
76	26	87	155	109	-79	30	-14	2	23	-1	-170	-116	7	10	176	-6	-58	11	119	190	51	-85	139	106	-454	17	85	-13	346	274	87	394	-221	159	-334	-205	-49	-98	39	-209	403	412	14	106	-326	-187	-25	231	48
77	18	87	154	110	-76	28	-13	8	25	-2	-173	-115	8	10	180	-6	-58	10	122	195	44	-87	142	109	-454	17	80	-16	350	271	94	388	-221	165	-339	-204	-44	-102	27	-210	402	409	17	111	-330	-179	-32	233	35
78	14	88	155	107	-74	28	-12	18	26	-1	-172	-117	9	10	185	-7	-57	10	128	207	25	-98	148	113	-454	0	79	-20	353	271	101	382	-221	170	-346	-201	-38	-112	15	-207	406	403	16	116	-333	-176	-35	227	32
79	4	94	161	103	-72	29	-9	26	29	-2	-161	-131	10	10	187	-8	-58	9	135	220	10	-108	153	114	-454	0	75	-20	358	272	108	373	-227	170	-368	-189	-41	-124	7	-201	425	390	22	120	-337	-170	-38	227	26
80	-5	102	164	103	-69	29	-6	34	33	0	-144	-135	11	10	189	-9	-58	8	136	233	2	-112	155	115	-460	0	73	-22	363	272	114	367	-232	170	-374	-180	-40	-140	1	-193	437	383	21	125	-340	-165	-46	237	23
81	-17	106	166	104	-61	30	-5	41	38	1	-156	-130	12	12	191	-9	-59	6	132	239	-1	-119	155	118	-460	-22	72	-24	368	271	116	365	-244	176	-370	-165	-40	-148	-3	-182	445	380	17	129	-347	-159	-51	247	18
82	-26	107	172	105	-56	30	-5	49	41	2	-161	-130	13	11	194	-12	-58	2	127	240	-4	-126	159	123	-460	-22	74	-27	372	269	117	360	-238	176	-358	-156	-44	-153	-1	-170	449	376	19	132	-351	-156	-60	268	6
83	-32	115	176	102	-50	32	-2	55	45	3	-161	-131	15	11	195	-12	-56	-3	123	241	18	-99	163	127	-460	-34	77	-32	376	267	118	352	-238	176	-340	-152	-55	-154	6	-159	450	372	22	133	-353	-148	-28	302	0
84	-43	113	185	95	-44	30	0	64	48	5	-162	-131	16	11	197	-16	-53	-7	113	243	21	-108	167	129	-460	-39	77	-32	380	263	114	344	-238	187	-332	-150	-69	-155	25	-155	443	362	23	138	-357	-144	-25	310	1
85	-45	114	195	90	-38	29	-3	70	53	7	-159	-131	18	10	199	-14	-48	-10	95	234	23	-99	168	131	-460	-39	77	-38	384	259	113	337	-238	204	-330	-149	-80	-151	35	-155	437	354	23	141	-363	-141	-32	293	5
86	-46	116	201	86	-30	28	-10	80	56	8	-157	-139	19	11	205	-15	-42	-12	103	227	23	-94	171	133	-454	-45	78	-38	387	258	106	331	-244	204	-322	-144	-90	-148	43	-156	432	347	30	148	-366	-140	-29	298	6
87	-52	122	207	85	-23	27	-13	88	59	7	-163	-148	20	11	210	-19	-37	-13	89	206	-8	-92	176	133	-449	-45	77	-40	392	252	105	327	-249	204	-310	-134	-104	-143	50	-159	434	340	35	152	-373	-144	-34	307	9
88	-53	128	214	88	-15	23	-16	93	61	7	-170	-151	21	11	211	-23	-32	-14	103	193	-7	-86	179	132	-437	-45	76	-36	398	247	106	325	-249	204	-302	-124	-116	-142	56	-164	441	335	33	156	-382	-152	-30	319	14
89	-55	134	221	90	-9	22	-22	96	62	7	-174	-152	21	11	217	-24	-30	-14	113	188	-6	-77	184	132	-432	-45	77	-58	402	247	103	323	-261	210	-289	-118	-124	-140	61	-172	444	333	38	159	-390	-155	-13	309	15
90	-57	138	227	92	-1	21	-38	100	62	6	-177	-155	22	12	218	-25	-29	-12	130	182	24	-52	189	132	-426	-45	104	-71	404	244	92	323	-261	210	-285	-113	-131	-135	66	-182	447	331	45	161	-397	-155	20	310	20
91	-62	148	232	91	6	19	-45	101	63	4	-185	-157	23	12	221	-27	-28	-13	140	184	24	-49	194	130	-420	-34	105	-71	405	239	82	322	-266	210	-290	-116	-137	-130	66	-191	448	330	44	166	-402	-156	20	293	24
92	-68	163	237	86	13	14	-51	101	64	2	-194	-159	25	12	225	-28	-27	-14	147	187	23	-47	201	128	-415	-22	105	-71	407	237	78	317	-272	204	-301	-131	-141	-124	69	-194	450	327	46	168	-406	-156	12	281	33
93	-68	173	242	83	18	8	-57	104	65	0	-199	-162	25	11	227	-29	-28	-15	150	187	44	-46	204	128	-415	-22	105	-71	407	233	77	311	-272	204	-302	-145	-144	-116	75	-195	450	326	49	170	-409	-157	7	274	42
94	-66	182	247	79	22	5	-62	106	65	-1	-202	-162	27	10	228	-28	-32	-15	150	193	44	-47	210	126	-415	-11	105	-71	408	229	77	305	-266	227	-313	-152	-147	-109	81	-193	450	325	54	172	-412	-157	-8	269	52
95	-68	189	253	77	29	3	-68	106	66	-2	-204	-165	28	9	232	-33	-37	-17	141	210	38	-39	214	124	-415	-11	106	-72	407	221	72	300	-272	233	-318	-160	-150	-104	85	-195	449	325	57	174	-414	-156	-19	265	62
96	-71	198	259	76	34	1	-75	105	66	-1	-208	-168	31	7	235	-34	-39	-17	134	211	33	-34	219	121	-415	-5	106	-71	408	214	70	295	-272	227	-319	-161	-154	-100	90	-194	448	324	55	176	-418	-154	-23	260	69
97	-72	208	266	79	39	1	-81	106	65	0	-214	-175	33	5	237	-36	-42	-19	116	216	28	-30	222	121	-420	-5	106	-71	413	205	67	290	-278	233	-331	-155	-157	-91	95	-184	445	321	58	182	-423	-152	-28	257	73
98	-72	220	272	81	43	4	-86	107	65	0	-222	-181	35	3	242	-36	-47	-24	104	208	16	-26	224	122	-443	0	107	-72	412	199	64	285	-278	244	-348	-151	-159	-81	98	-172	444	318	61	180	-426	-151	-46	239	75
99	-71	231	279	78	47	7	-90	110	64	0	-225	-186	37	2	248	-36	-53	-29	92	206	-4	-29	229	120	-449	0	105	-69	414	193	59	282	-284	244	-361	-156	-160	-78	94	-159	443	316	63	180	-430	-146	-41	257	74
100	-71	244	286	76	47	8	-92	112	63	1	-226	-192	39	0	253	-37	-54	-33	91	193	-34	-60	229	118	-454	0	106	-70	414	190	55	280	-284	244	-371	-166	-157	-72	86	-155	443	314	64	172	-433	-138	-51	267	76
[truncated: 57 more columns]

## Sheet: SuppFig6A-GoF Trajectories
Plotted Trajectories for Supp Fig 5 and 6A Relative X and Relative Y are seen plotted for each trajectory
	relative X	relative Y	relative X	relative Y	relative X	relative Y	relative X	relative Y	relative X	relative Y	relative X	relative Y	relative X	relative Y	relative X	relative Y	relative X	relative Y	relative X	relative Y	relative X	relative Y	relative X	relative Y	relative X	relative Y	relative X	relative Y	relative X	relative Y	relative X	relative Y	relative X	relative Y	relative X	relative Y	relative X	relative Y	relative X	relative Y	relative X	relative Y	relative X	relative Y	relative X	relative Y	relative X	relative Y	relative X
	Cell 1		Cell 2		Cell 3		Cell 4		Cell 5		Cell 6		Cell 7		Cell 8		Cell 9		Cell 10		Cell 11		Cell 12		Cell 13		Cell 14		Cell 15		Cell 16		Cell 17		Cell 18		Cell 19		Cell 20		Cell 21		Cell 22		Cell 23		Cell 24		Cell 25
Frame	relative X	relative Y	relative X	relative Y	relative X	relative Y	relative X	relative Y	relative X	relative Y	relative X	relative Y	relative X	relative Y	relative X	relative Y	relative X	relative Y	relative X	relative Y	relative X	relative Y	relative X	relative Y	relative X	relative Y	relative X	relative Y	relative X	relative Y	relative X	relative Y	relative X	relative Y	relative X	relative Y	relative X	relative Y	relative X	relative Y	relative X	relative Y	relative X	relative Y	relative X	relative Y	relative X	relative Y	relative X
1			0	0	0	0	0	0	0	0	0	0	0	0	0	0	0	0	0	0	0	0	0	0	0	0	0	0	0	0	0	0	0	0	0	0	0	0	0	0	0	0	0	0	0	0	0	0	0
2	0	0	-5	-3	-10	5	-10	-8	0	2	-2	-2	4	8	-3	2	5	1	6	-3	1	2	0	0	-1	5	5	-7	1	-3	-3	5	8	0	-2	6	0	0	-3	-3	4	5	0	11	6	2	0	-1	14
3	0	6	-10	-7	-19	10	-15	-14	-2	1	-4	-1	9	12	-6	4	11	0	15	-3	2	4	-5	-5	-7	8	7	-12	2	-6	-5	5	8	0	-3	11	-3	0	-5	-3	7	7	0	11	15	2	-6	0	19
4	0	18	-14	-12	-23	13	-13	-25	-9	-2	-5	2	11	12	-9	3	15	0	20	-9	2	6	-5	-13	-22	13	10	-21	1	-9	-8	5	8	-5	-4	13	2	0	-15	-3	9	9	11	11	25	2	-9	-3	25
5	-7	26	-16	-19	-23	17	-24	-37	-13	-7	-2	3	13	14	-13	4	17	0	21	-11	3	8	0	-15	-29	15	13	-30	1	-13	-8	3	13	0	-4	16	0	3	-13	-3	9	11	5	11	30	5	-14	-7	28
6	-12	28	-17	-26	-24	20	-22	-41	-15	-7	4	8	11	19	-18	5	20	0	25	-11	3	10	0	-18	-36	21	15	-37	-3	-16	-8	8	13	-8	-5	18	-6	-2	-20	0	6	18	17	11	39	8	-18	-7	29
7	-12	36	-18	-33	-27	26	-18	-37	-15	-11	8	11	11	21	-23	3	22	0	23	-9	4	11	6	-13	-39	25	15	-45	-7	-21	-5	18	13	-5	-10	23	-3	-5	-28	2	2	21	22	0	41	16	-21	-11	28
8	-15	43	-20	-40	-26	28	-20	-25	-13	-14	10	9	4	15	-25	4	24	0	24	-3	7	11	13	0	-39	25	20	-50	-7	-22	2	20	13	-5	-14	25	0	-5	-35	7	-6	31	22	0	46	15	-23	-14	22
9	-17	51	-23	-46	-27	29	-21	-14	1	-19	8	3	0	8	-23	9	27	3	27	2	8	12	8	0	-32	49	22	-56	-8	-23	7	20	15	-5	-19	24	0	-7	-43	7	-12	35	28	11	53	15	-24	-19	17
10	-17	64	-26	-53	-28	28	-17	-5	4	-22	5	2	-6	-4	-24	12	29	3	26	7	9	12	6	2	-23	54	24	-60	-9	-24	17	18	8	-5	-21	25	2	-10	-41	10	-17	23	39	11	59	14	-24	-25	13
11	-17	69	-30	-59	-32	26	-15	5	5	-25	2	5	-15	-12	-24	14	30	5	23	8	10	13	6	2	-21	53	26	-63	-9	-23	22	15	-10	-8	-23	27	7	-15	-46	15	-19	24	34	11	68	13	-22	-28	14
12	-22	74	-34	-66	-37	24	-11	17	5	-27	2	7	-25	-20	-24	15	30	3	20	10	11	14	6	-3	-17	51	30	-67	-8	-22	30	10	-15	0	-25	27	10	-15	-51	15	-23	22	45	11	74	9	-20	-34	11
13	-22	81	-37	-73	-41	25	-4	28	5	-27	-3	10	-32	-31	-21	17	29	4	18	9	13	13	6	0	-13	45	36	-72	-4	-19	30	10	-20	2	-28	29	17	-17	-53	17	-33	13	51	11	78	9	-23	-39	4
14	-22	86	-37	-78	-46	27	8	33	6	-30	-1	10	-30	-40	-34	4	30	5	15	6	15	12	11	-5	-8	34	43	-79	-2	-8	35	5	-20	0	-33	30	25	-20	-58	17	-44	3	57	0	84	7	-22	-44	-1
15	-22	97	-38	-84	-50	26	15	35	8	-35	-4	9	-30	-47	-37	1	29	8	18	3	18	12	11	-5	-2	27	57	-81	1	-4	40	0	-23	0	-37	32	35	-15	-66	17	-51	-2	62	-6	87	10	-16	-51	-4
16	-22	104	-41	-88	-55	30	23	30	10	-38	-3	11	-31	-44	-40	1	29	11	22	1	22	12	8	-8	2	23	66	-82	5	2	35	-7	-23	5	-43	34	40	-10	-68	17	-55	-7	68	0	95	13	-15	-53	1
17	-22	109	-45	-94	-59	36	20	13	12	-41	2	7	-33	-45	-44	2	29	11	28	-4	24	12	8	-5	2	15	71	-86	8	5	35	-17	-28	2	-47	35	50	-15	-76	17	-62	-8	68	0	102	10	-14	-57	-1
18	-22	119	-48	-100	-62	47	12	9	15	-50	-2	6	-33	-45	-45	6	28	13	32	-11	25	11	8	-5	4	9	75	-89	14	10	35	-20	-33	2	-49	37	60	-15	-86	20	-70	-11	79	-6	107	10	-12	-60	-2
19	-30	127	-52	-107	-69	55	7	8	17	-58	1	3	-34	-48	-48	13	27	14	41	-7	28	10	6	-3	9	6	74	-92	17	15	33	-25	-35	2	-52	37	63	-10	-84	20	-76	-15	79	-6	112	7	-10	-65	-5
20	-30	129	-55	-112	-73	60	6	-1	20	-63	2	0	-23	-42	-52	19	26	13	41	1	29	9	-5	5	15	-1	77	-92	18	17	28	-25	-35	2	-54	38	73	-15	-91	25	-82	-16	85	-17	118	7	-4	-71	-11
21	-30	137	-56	-117	-76	64	-2	-8	20	-64	1	2	-17	-40	-59	21	25	13	38	10	30	9	-10	0	24	-3	81	-94	20	19	30	-33	-38	2	-56	37	83	-15	-91	27	-87	-15	85	-23	126	8	2	-75	-14
22	-33	140	-58	-122	-81	67	-4	-18	22	-66	5	2	-9	-36	-63	25	24	13	38	18	30	8	-15	2	34	-5	84	-96	20	20	20	-33	-38	5	-58	36	86	-15	-94	27	-90	-17	91	-23	132	7	7	-77	-21
23	-40	147	-60	-127	-87	71	-4	-30	25	-65	7	1	-6	-27	-66	27	23	13	41	15	30	7	-17	0	44	-9	89	-97	21	20	17	-33	-43	5	-61	34	91	-23	-99	32	-93	-18	91	-29	136	7	16	-78	-31
24	-43	157	-64	-132	-94	73	-3	-41	26	-63	8	0	5	-18	-69	29	22	13	44	7	30	8	-22	-5	51	-12	94	-96	22	18	10	-25	-45	5	-62	34	96	-28	-101	35	-96	-17	91	-29	141	4	26	-77	-44
25	-40	165	-67	-140	-102	69	6	-49	27	-60	7	0	12	-17	-74	30	22	13	43	-1	31	8	-22	-5	56	-14	102	-94	23	18	10	-17	-45	5	-63	31	106	-25	-104	38	-101	-17	91	-29	146	2	35	-78	-53
26	-40	172	-68	-147	-104	71	10	-61	28	-59	6	0	20	-13	-78	34	22	14	43	-1	30	8	0	2	66	-22	107	-95	23	19	10	-20	-50	5	-64	30	113	-25	-106	43	-105	-18	91	-46	152	-2	42	-82	-64
27	-43	177	-69	-154	-107	72	12	-69	28	-54	6	1	27	-5	-80	38	22	13	45	0	31	9	6	10	68	-24	110	-97	23	18	7	-15	-50	5	-66	30	118	-25	-116	45	-108	-23	91	-57	159	-1	46	-86	-74
28	-60	190	-70	-158	-110	74	5	-75	29	-54	10	1	35	7	-83	43	21	13	43	-2	29	8	11	15	66	-24	112	-97	20	14	7	-15	-53	10	-64	29	123	-28	-121	55	-110	-27	91	-57	164	-16	54	-85	-82
29	-53	193	-66	-165	-113	72	10	-86	26	-52	9	4	37	8	-86	45	22	12	44	-8	27	10	11	17	62	-23	114	-97	20	6	12	-12	-58	12	-66	29	123	-35	-124	55	-113	-28	91	-63	170	-17	61	-87	-87
30	-53	195	-67	-171	-113	68	13	-98	23	-53	8	4	39	11	-88	47	22	12	46	-9	24	12	8	20	48	-25	115	-96	15	0	10	-12	-56	20	-67	28	126	-40	-124	65	-119	-23	91	-68	174	-17	65	-90	-96
31	-50	200	-68	-179	-112	70	13	-107	19	-55	9	3	39	19	-90	51	21	13	53	-9	23	16	8	25	37	-20	116	-94	10	-3	17	-12	-56	20	-68	29	136	-45	-124	65	-124	-17	85	-80	179	-19	73	-92	-105
32	-53	208	-67	-187	-111	69	13	-114	21	-56	12	2	43	21	-94	53	21	13	64	-14	22	19	8	20	20	-20	115	-94	7	-7	17	-15	-58	20	-69	28	139	-50	-124	73	-129	-11	79	-80	182	-20	78	-94	-116
33	-58	213	-67	-196	-111	69	15	-112	23	-54	10	5	52	18	-100	55	21	14	73	-26	21	20	3	15	4	-24	114	-94	6	-13	17	-15	-58	30	-67	28	144	-58	-127	78	-132	-3	74	-80	184	-20	82	-94	-125
34	-65	231	-66	-203	-113	71	15	-113	22	-56	12	-1	61	17	-105	57	20	14	81	-33	19	21	-5	7	-11	-24	115	-95	6	-16	25	-20	-50	35	-65	28	146	-63	-127	81	-135	2	62	-80	188	-21	87	-93	-134
35	-71	231	-61	-209	-112	71	8	-113	21	-58	14	-3	71	18	-110	61	21	14	88	-45	16	20	-5	2	-22	-23	114	-96	5	-20	22	-25	-48	35	-67	28	149	-71	-127	86	-136	7	62	-80	193	-23	92	-96	-143
36	-76	236	-59	-215	-109	73	1	-109	23	-59	15	2	78	14	-114	67	22	14	99	-47	12	20	-5	-3	-37	-8	113	-95	5	-24	30	-33	-45	40	-67	27	159	-78	-124	98	-138	16	57	-80	199	-23	100	-96	-149
37	-83	238	-57	-224	-107	74	-3	-98	31	-59	23	8	89	10	-120	73	20	15	109	-45	9	18	-5	-13	-47	6	112	-96	3	-25	33	-35	-45	40	-67	26	159	-86	-127	101	-139	22	51	-80	203	-26	104	-94	-158
38	-83	246	-55	-232	-103	76	-9	-92	38	-58	28	22	98	16	-126	76	20	14	120	-43	7	14	-5	-18	-51	8	107	-99	2	-25	40	-33	-50	40	-67	26	159	-88	-127	108	-141	27	45	-68	207	-29	107	-94	-165
39	-93	243	-50	-237	-99	80	-12	-86	42	-59	23	33	106	16	-128	77	19	14	130	-41	5	13	-5	-20	-43	28	105	-99	1	-26	45	-38	-50	45	-68	25	166	-96	-127	113	-143	31	45	-63	211	-30	112	-102	-173
40	-93	243	-48	-242	-88	86	-22	-78	48	-62	18	41	117	22	-133	79	18	15	139	-38	4	9	3	-23	-31	31	102	-98	-1	-24	55	-35	-45	40	-70	23	164	-103	-127	116	-148	33	45	-57	215	-32	116	-106	-183
41	-103	248	-47	-248	-77	93	-29	-69	56	-67	0	47	127	22	-140	84	17	16	150	-36	5	5	3	-28	-19	33	100	-98	-3	-22	58	-35	-43	45	-73	22	159	-111	-124	116	-152	37	51	-57	218	-36	119	-111	-192
42	-114	253	-40	-256	-66	96	-41	-67	66	-76	-6	56	132	9	-148	86	16	16	160	-35	4	1	3	-23	-11	35	97	-99	-5	-21	68	-28	-43	40	-72	23	161	-116	-121	113	-154	41	45	-46	220	-39	121	-116	-201
43	-121	268	-35	-264	-58	97	-48	-69	70	-83	-12	65	130	6	-155	85	15	15	171	-33	4	-2	-5	-20	-3	31	93	-101	-7	-18	73	-28	-45	40	-71	24	159	-124	-116	113	-157	45	45	-40	221	-41	122	-126	-207
44	-124	266	-33	-272	-56	98	-55	-73	75	-86	-16	74	136	-5	-161	84	14	15	182	-37	4	-5	-5	-20	4	28	88	-101	-10	-13	78	-28	-35	40	-72	24	161	-124	-109	108	-161	49	45	-40	223	-44	121	-132	-212
45	-129	261	-30	-281	-55	98	-62	-76	80	-88	-17	81	145	-12	-165	82	13	15	194	-41	7	-9	-5	-10	12	30	84	-100	-13	-7	81	-25	-28	45	-74	23	161	-129	-104	108	-164	51	45	-40	225	-46	124	-139	-215
46	-134	268	-25	-288	-55	99	-73	-77	82	-90	-23	81	150	-17	-170	80	14	14	205	-43	8	-10	-5	-5	19	33	82	-98	-14	0	81	-17	-25	48	-75	23	169	-139	-99	108	-165	52	51	-29	228	-44	125	-143	-225
47	-141	268	-19	-297	-53	93	-82	-79	85	-91	-27	81	155	-20	-174	79	14	12	214	-46	8	-11	-5	-3	23	31	80	-97	-14	3	86	-20	-25	48	-81	22	166	-141	-94	108	-167	50	45	-29	231	-44	124	-151	-235
48	-154	266	-12	-304	-45	85	-90	-84	86	-95	-29	88	154	-20	-181	78	13	11	224	-48	9	-12	-7	5	27	33	76	-92	-16	8	86	-15	-20	48	-80	23	164	-144	-86	108	-168	56	57	-23	235	-45	124	-157	-243
49	-159	268	-6	-313	-38	78	-93	-88	88	-90	-28	95	150	-15	-186	79	12	10	232	-50	11	-12	-10	15	22	49	73	-89	-18	12	86	-10	-23	48	-80	23	161	-149	-78	106	-172	53	51	-6	239	-44	122	-163	-249
50	-164	276	1	-320	-32	64	-95	-96	92	-88	-23	104	142	-9	-189	79	10	9	239	-51	9	-14	-15	15	18	54	72	-87	-19	19	86	-10	-13	40	-75	25	154	-157	-71	103	-180	41	45	-6	242	-45	121	-166	-258
51	-174	274	6	-326	-36	48	-100	-104	97	-85	-15	111	133	1	-192	80	10	7	250	-52	8	-15	-15	20	14	56	71	-85	-19	26	88	-7	-7	40	-78	24	146	-157	-68	103	-191	30	45	-6	246	-43	120	-168	-267
52	-182	284	13	-331	-39	34	-105	-111	104	-78	-10	114	125	9	-195	81	9	7	261	-54	7	-18	-17	17	9	54	71	-83	-20	27	86	-2	-5	30	-82	22	149	-157	-68	96	-198	26	45	0	251	-46	120	-171	-274
53	-189	281	20	-336	-38	32	-110	-114	112	-71	-9	117	120	10	-197	82	8	6	272	-55	6	-21	-17	20	4	52	71	-82	-21	28	83	0	3	38	-88	21	141	-157	-61	96	-205	27	51	11	253	-49	117	-173	-280
54	-199	284	29	-340	-31	30	-116	-118	118	-67	-11	118	116	14	-202	83	5	6	280	-52	6	-23	-17	17	-9	47	69	-79	-19	29	78	3	8	38	-91	19	139	-164	-53	96	-209	26	51	17	256	-51	112	-177	-285
55	-202	286	36	-346	-28	30	-123	-123	122	-65	-15	117	110	18	-207	83	3	5	286	-49	5	-26	-22	17	-20	40	68	-76	-17	28	73	10	10	40	-95	19	141	-169	-48	96	-212	23	51	17	260	-53	107	-180	-290
56	-210	289	43	-350	-26	32	-132	-121	124	-61	-20	123	103	25	-210	83	2	3	294	-42	1	-32	-22	15	-29	33	68	-70	-17	28	71	8	13	38	-97	19	136	-177	-48	96	-215	21	57	22	266	-52	103	-182	-299
57	-217	284	51	-354	-24	31	-138	-120	127	-58	-22	127	94	32	-213	81	1	2	301	-38	0	-35	-22	10	-38	23	65	-63	-18	28	71	10	15	38	-98	20	136	-174	-43	96	-219	21	62	22	271	-53	101	-185	-307
58	-220	281	59	-359	-22	32	-147	-125	133	-56	-21	129	87	38	-218	76	1	0	306	-36	-1	-37	-27	5	-44	6	65	-54	-19	26	71	8	15	30	-99	20	134	-177	-35	96	-223	20	57	34	276	-54	97	-189	-314
59	-230	279	71	-361	-21	32	-155	-129	136	-49	-20	129	81	46	-222	73	1	-1	314	-36	-1	-40	-32	2	-47	-10	65	-43	-19	23	73	10	23	30	-103	23	134	-179	-35	91	-225	17	68	34	280	-53	94	-194	-319
60	-235	276	81	-360	-18	33	-162	-132	136	-45	-18	129	72	51	-226	73	0	-1	325	-36	0	-42	-32	0	-50	-20	64	-31	-27	26	71	8	18	27	-104	28	131	-187	-33	91	-229	16	79	22	283	-56	93	-197	-323
61	-242	279	90	-359	-15	35	-167	-131	134	-42	-14	128	65	59	-229	71	0	-3	335	-36	2	-44	-40	0	-54	-26	62	-19	-33	25	78	3	18	27	-104	34	131	-184	-33	91	-233	17	85	34	289	-53	91	-199	-330
62	-245	279	98	-359	-11	37	-173	-128	130	-40	-11	128	60	65	-232	70	-1	-3	346	-38	3	-49	-45	0	-55	-28	62	-11	-35	24	78	0	20	27	-105	38	123	-184	-28	88	-236	15	91	22	293	-56	89	-201	-335
63	-253	274	107	-358	-4	36	-179	-127	125	-42	-9	128	58	66	-235	69	-2	-5	355	-38	4	-53	-53	0	-55	-27	60	-6	-37	22	81	-2	25	22	-105	42	128	-187	-20	86	-239	17	102	22	296	-55	86	-205	-338
64	-253	274	117	-359	1	33	-185	-123	121	-44	-8	129	55	70	-238	69	-3	-6	362	-41	6	-56	-58	2	-54	-15	60	-3	-37	22	78	0	25	22	-104	44	128	-187	-18	83	-244	22	108	22	299	-59	86	-207	-341
65	-260	271	128	-360	5	32	-191	-119	117	-46	-8	130	52	69	-242	69	-4	-5	372	-40	10	-58	-68	2	-50	-14	60	1	-36	22	83	0	20	22	-103	45	123	-179	-10	83	-249	31	102	22	302	-58	82	-210	-349
66	-265	268	137	-361	13	29	-194	-113	111	-46	-9	133	47	68	-245	68	-4	-6	384	-39	11	-60	-75	0	-46	-10	59	5	-35	23	88	-7	20	22	-102	46	123	-179	-8	83	-252	41	108	34	306	-56	77	-213	-355
67	-275	258	149	-362	14	26	-199	-107	105	-53	-11	132	40	67	-248	67	-4	-6	393	-44	12	-62	-85	10	-41	-5	50	11	-34	24	88	-7	25	22	-104	45	126	-179	-3	81	-257	52	102	39	309	-60	71	-218	-360
68	-283	263	160	-361	17	26	-206	-104	97	-58	-12	131	29	67	-250	65	-4	-5	397	-46	14	-65	-88	10	-34	4	47	19	-33	26	93	-2	28	22	-105	43	128	-179	0	78	-259	58	108	51	312	-57	70	-221	-367
69	-290	258	168	-361	18	24	-213	-101	90	-59	-7	128	24	60	-252	65	-5	-5	402	-47	13	-69	-98	10	-26	10	43	23	-31	28	96	-7	30	30	-105	44	134	-164	10	73	-262	62	108	51	315	-61	65	-225	-373
70	-296	261	176	-363	19	25	-217	-99	86	-61	3	129	17	61	-253	65	-6	-3	407	-47	14	-73	-106	10	-17	17	40	26	-29	31	98	-2	28	30	-104	44	139	-162	10	73	-265	67	113	51	318	-57	59	-228	-381
71	-301	256	186	-363	19	25	-224	-94	82	-64	11	130	20	61	-253	65	-6	-2	412	-50	14	-75	-113	10	-7	22	39	27	-25	33	101	0	33	38	-104	44	139	-162	15	73	-266	74	119	51	322	-60	54	-232	-385
72	-306	253	196	-365	18	25	-229	-91	80	-66	17	130	23	61	-253	64	-6	-2	415	-54	14	-78	-121	15	4	24	37	26	-22	40	103	0	41	48	-104	44	144	-157	20	70	-267	80	119	51	326	-59	50	-236	-389
73	-316	248	206	-365	17	24	-237	-90	79	-65	21	135	23	59	-250	63	-7	-1	422	-58	16	-84	-128	15	9	32	35	25	-19	46	103	3	41	55	-104	43	146	-157	25	70	-271	87	119	62	329	-56	47	-237	-395
74	-323	248	214	-363	17	23	-244	-90	80	-63	26	141	23	51	-248	64	-8	0	434	-65	17	-87	-136	10	14	38	35	26	-16	50	111	8	41	58	-107	42	149	-151	25	70	-276	92	125	62	332	-57	42	-240	-399
75	-328	246	223	-360	17	22	-252	-91	81	-62	27	145	17	55	-244	56	-8	0	444	-72	20	-90	-141	10	17	48	35	26	-12	56	113	5	41	63	-108	40	146	-149	33	70	-278	97	125	62	336	-53	39	-242	-404
76	-328	241	233	-355	17	22	-258	-93	83	-63	26	148	16	55	-242	61	-9	1	450	-81	22	-91	-146	15	20	57	35	28	-9	59	113	18	41	65	-110	40	156	-149	35	70	-280	103	125	56	340	-53	37	-246	-410
77	-331	233	243	-352	17	22	-263	-94	85	-63	22	151	14	59	-242	58	-8	1	457	-89	24	-95	-154	20	22	64	35	28	-9	62	113	18	38	65	-107	42	159	-146	38	70	-284	114	130	62	344	-52	36	-251	-411
78	-336	231	252	-353	19	20	-269	-96	86	-63	20	156	1	95	-239	58	-9	1	463	-97	27	-98	-159	22	23	68	35	28	-7	62	113	26	38	65	-108	42	159	-144	43	70	-286	120	142	56	349	-52	34	-255	-418
79	-331	225	262	-351	20	18	-271	-101	87	-64	16	160	-9	82	-234	61	-9	1	470	-105	30	-105	-164	22	23	70	36	28	-8	62	116	28	15	65	-111	41	169	-141	50	70	-289	123	142	56	353	-52	32	-260	-420
80	-331	223	273	-349	22	16	-272	-107	88	-66	14	166	-9	82	-234	68	-10	1	472	-112	34	-112	-174	25	22	73	38	27	-10	65	119	28	15	65	-112	41	169	-139	53	70	-291	127	147	56	355	-52	28	-265	-424
81	-323	225	282	-344	25	14	-269	-110	89	-67	17	171	-9	82	-229	66	-10	2	475	-113	36	-115	-181	33	25	74	39	25	-12	69	119	36	10	65	-109	42	171	-131	56	70	-296	130	153	56	356	-49	24	-267	-429
82	-326	223	289	-340	30	11	-266	-111	91	-69	21	173	-10	82	-229	68	-9	1	474	-112	37	-116	-189	30	26	74	41	24	-13	74	119	46	10	65	-107	43	174	-131	61	70	-299	132	164	56	359	-47	18	-270	-432
83	-326	218	299	-335	42	4	-262	-117	93	-71	33	166	-14	83	-227	71	-9	0	478	-114	39	-118	-194	33	24	73	44	23	-14	77	121	46	3	73	-108	43	169	-129	56	70	-302	134	159	56	362	-43	12	-272	-433
84	-323	218	308	-327	47	-1	-262	-123	93	-76	35	163	-15	82	-234	91	-10	0	477	-115	42	-120	-202	33	25	70	46	22	-20	82	116	46	5	88	-110	42	169	-129	66	70	-304	135	159	56	366	-42	6	-274	-436
85	-323	210	317	-323	50	-3	-261	-129	95	-77	35	157	-16	82	-229	76	-10	0	475	-113	42	-123	-202	45	24	68	48	22	-27	83	124	51	0	93	-112	41	174	-126	73	68	-306	135	176	56	369	-39	-1	-272	-442
86	-318	200	326	-320	54	-4	-261	-133	96	-74	32	154	-19	83	-216	73	-9	0	478	-109	43	-124	-209	45	25	70	52	22	-30	80	119	56	0	98	-116	38	177	-129	76	68	-308	136	159	62	372	-33	-6	-273	-445
87	-316	193	335	-314	54	-7	-263	-140	97	-72	28	153	-26	91	-209	68	-10	0	478	-101	44	-126	-222	48	27	69	56	23	-32	76	113	63	-10	101	-120	36	177	-129	81	68	-310	136	176	56	375	-31	-11	-272	-448
88	-306	188	344	-307	55	-8	-261	-144	97	-70	26	155	-31	100	-216	66	-11	-1	476	-98	47	-127	-227	48	28	71	61	26	-33	72	108	61	-18	101	-130	33	182	-126	78	63	-313	137	153	56	378	-29	-15	-275	-458
89	-301	185	353	-299	54	-8	-258	-147	96	-69	27	162	-38	109	-211	63	-9	-2	470	-90	49	-129	-234	48	30	71	63	27	-33	70	111	58	-15	101	-139	33	182	-126	86	60	-317	138	159	51	380	-25	-19	-273	-462
90	-298	183	365	-293	55	-8	-254	-151	96	-70	24	173	-45	116	-219	58	-8	-4	462	-84	50	-132	-245	43	33	70	66	28	-31	66	119	63	-28	101	-143	35	182	-126	86	55	-321	140	164	51	383	-23	-23	-273	-465
91	-288	185	374	-286	56	-10	-249	-154	95	-70	26	178	-51	120	-219	58	-8	-5	454	-77	52	-133	-252	43	35	70	67	27	-27	62	106	68	-23	101	-145	36	182	-129	88	55	-325	143	159	51	383	-17	-27	-275	-469
92	-278	183	383	-280	57	-10	-246	-157	93	-73	26	184	-58	123	-229	61	-7	-7	445	-73	55	-135	-255	48	37	71	71	29	-20	57	98	68	-20	101	-149	38	182	-126	96	50	-329	146	136	39	385	-15	-31	-276	-473
93	-278	180	392	-274	56	-10	-245	-162	91	-76	27	187	-63	126	-244	67	-5	-9	439	-73	57	-138	-265	55	38	70	73	30	-10	52	103	71	-25	101	-150	41	197	-126	96	50	-330	147	136	39	386	-12	-35	-276	-475
94	-270	175	402	-267	58	-12	-242	-165	88	-78	31	190	-65	133	-256	71	-3	-12	433	-71	60	-139	-272	58	38	69	76	30	-6	49	98	74	-28	101	-152	43	204	-129	93	38	-331	148	153	39	387	-10	-38	-279	-476
95	-263	167	409	-260	60	-14	-241	-169	87	-77	35	190	-66	135	-263	77	5	-13	428	-71	65	-140	-272	65	40	67	78	31	-4	42	96	71	-28	91	-152	45	194	-131	99	38	-332	148	147	39	390	-8	-44	-282	-481
96	-258	172	419	-254	64	-18	-240	-173	87	-76	37	190	-71	142	-267	82	7	-15	423	-70	66	-144	-275	70	40	65	80	32	2	38	91	68	-30	91	-151	48	199	-134	91	38	-333	150	159	51	391	-5	-48	-283	-490
97	-248	165	427	-246	66	-21	-237	-177	87	-77	40	189	-75	146	-270	82	9	-19	418	-69	69	-145	-287	73	42	62	82	34	6	33	93	74	-28	76	-149	51	192	-131	91	27	-333	150	164	51	394	-4	-52	-284	-501
98	162	432	-238	75	-27	-232	-179	86	-79	42	188	-81	149	-275	81	10	-21	412	-64	72	-147	-287	78	43	59	84	35	12	29	88	68	-30	76	-148	55	197	-134	91	27	-333	150	164	51	396	-2	-55	-285	-511	-90
99	160	437	-232	80	-28	-226	-178	85	-82	33	185	-87	152	-279	84	11	-23	406	-56	75	-148	-287	78	47	57	87	37	17	24	88	71	-23	73	-146	58	199	-129	91	20	-331	148	176	51	398	-2	-58	-286	-524	-89
100	150	444	-224	86	-30	-220	-178	82	-86	27	188	-91	156	-284	86	12	-24	400	-50	78	-150	-287	78	48	55	89	39	22	21	86	74	-33	73	-143	61	202	-134	88	15	-330	145	176	56	400	-1	-62	-287	-534	-89
[truncated: 89 more columns]

## Sheet: SuppFig6B MSD Avg (Plotted)
Source data for Supp. Fig. 6B: Plotted Average Mean Squared Displacement (MSD) and SEM. MSD calculated using DiPer software (Gorelik et al 2013) from trajectories shown in Supp Fig. 5/6A
Control(GoF)				GoF
Time	Avg MSD	MSD SEM		Time	Avg MSD	MSD SEM
5	67.4792	7.83343		5	49.2871	4.93253
10	216.638	25.1061		10	146.008	14.0334
15	434.837	50.552		15	288.355	28.0623
20	710.143	82.5717		20	469.712	45.9002
25	1034.61	119.628		25	684.689	67.0475
30	1397.49	160.292		30	929.607	91.0742
35	1791.92	203.871		35	1199.63	117.715
40	2208.39	249.531		40	1492.77	147.06
45	2640.17	296.389		45	1806.44	179.021
50	3081.28	343.406		50	2141.35	213.701
55	3527.06	390.744		55	2495.99	251.064
60	3976.37	438.988		60	2866.74	290.779
65	4425.65	488.573		65	3253.55	333.03
70	4873.4	539.454		70	3651.39	377.195
75	5317.61	591.944		75	4063.83	423.981
80	5759.97	646.696		80	4486.44	473.036
85	6200.86	703.333		85	4920.31	524.34
90	6642.9	762.4		90	5364.59	578.477
95	7088.97	824.543		95	5820.96	635.262
100	7537.55	889.305		100	6287.48	694.673
105	7991.56	956.427		105	6762.27	756.378
110	8450.84	1025.18		110	7245.47	820.487
115	8913.32	1094.98		115	7735.64	886.984
120	9379.26	1167.07		120	8232.45	955.586
125	9849.2	1241.19		125	8737.82	1026.45
130	10323.8	1317.43		130	9252.56	1099.49
135	10799.3	1395.23		135	9777.44	1174.39
140	11271.8	1474.45		140	10313.1	1251.63
145	11740.8	1555.31		145	10859.6	1331.29
150	12204.1	1638.34		150	11417.6	1412.92
155	12666.6	1724.5		155	11982.4	1496.3
160	13119.5	1812.32		160	12554.5	1581.61
165	13565.4	1902.71		165	13131.4	1668.76
170	14005.5	1996.62		170	13717.9	1758.31
175	14443.4	2093.95		175	14311.4	1849.93
180	14876.1	2193.98		180	14913.7	1943.83
185	15314.3	2297.82		185	15522.7	2039.19
190	15751.8	2403.53		190	16135.7	2136.5
195	16185.3	2510.84		195	16750.3	2235.36
200	16615.3	2620.11		200	17368.4	2335.6
205	17044.6	2730.06		205	17986.2	2436.42
210	17474.2	2840.76		210	18601.3	2537.69
215	17913.5	2952.82		215	19217.8	2640.4
220	18360.7	3065.98		220	19831.1	2744.64
225	18808.4	3180.56		225	20440	2849.66
230	19258	3296.21		230	21042.9	2955.43
235	19706.4	3411.43		235	21641.5	3061.8
240	20157.5	3527.82		240	22237.3	3168.22

## Sheet: SuppFig6B MSD Individual Cells
Control(GoF) MSD
cell# 1	cell# 2	cell# 3	cell# 4	cell# 5	cell# 6	cell# 7	cell# 8	cell# 9	cell# 10	cell# 11	cell# 12	cell# 13	cell# 14	cell# 15	cell# 16	cell# 17	cell# 18	cell# 19	cell# 20	cell# 21	cell# 22	cell# 23	cell# 24	cell# 25	cell# 26	cell# 27	cell# 28	cell# 29	cell# 30	cell# 31	cell# 32	cell# 33	cell# 34	cell# 35	cell# 36	cell# 37	cell# 38	cell# 39	cell# 40	cell# 41	cell# 42	cell# 43	cell# 44	cell# 45	cell# 46	cell# 47	cell# 48	cell# 49	cell# 50
89.5	40.1414	41.9293	52.1616	6.82828	73.4949	9.92929	13.2323	14.0505	186.182	212.182	14.2121	129.293	30.8485	47.2727	73.9293	67.4545	218.071	95.0808	79.0202	119.788	93.2121	61.6061	157.798	146.141	114.515	88.4747	26.5051	45.9798	38.9798	105.202	228.121	48.0202	13.2323	35.2929	11.4242	4.64646	83.5253	11.5051	24.0101	84.5859	90.4646	47.7879	97.1919	16.2525	84.798	24.4545	63.5859	26.8081	68.2727
327.402	133.602	153.857	170.99	24.3265	255.153	35.8163	40.9592	49.8673	647.929	562.02	44.1327	330.112	74.0714	178.816	267.02	149.929	785.061	334.245	282.184	441.806	313.99	233.49	455.704	538.898	356.776	292.724	96.8163	158.867	145.286	244.112	651.541	175.541	40.9592	97.1327	24.9388	12.5102	215.49	36.9286	62.7245	298.031	325.663	179.306	292.99	47.5204	309.714	86.2857	173.255	68.6633	204
689.354	270.732	324.577	335.134	51.6082	521.794	76.9897	83.3918	102.412	1359.02	978.268	91.5258	637.072	130.464	389.938	561.113	246.072	1614.45	695.68	572.412	944.969	643.845	509.742	824.608	1140.92	694.969	593.907	209.031	321.969	306.948	458.691	1245.58	379.866	83.3918	166.155	42.2577	23.4742	396.557	77.567	114.784	598.866	690.165	390.454	579.732	98.3918	647.371	179.041	334.299	118.887	397.216
1159.81	448.302	545.219	527.896	86.9167	860.583	131.833	140.885	165.073	2266.57	1442.82	157.115	1022.98	190.688	677.875	943.333	366.312	2633.69	1147.04	912.677	1615.89	1062.26	889.427	1267.91	1912.26	1094.38	962.365	359.49	527.479	514.052	710.865	1993.39	655.698	140.885	250.948	63.4583	36.8438	640.719	133.208	179.24	966.031	1174.78	676.562	929.25	165.094	1068.19	296.365	551.344	176.219	634.094
1726.2	660.516	808.6	747.126	129.116	1259.17	199.747	215.284	235.463	3326.04	1967.21	240.453	1457.45	262.053	1035.06	1408.59	519.589	3787.08	1680.41	1282.35	2444.48	1559.54	1368.15	1763.61	2807.63	1511.33	1373.89	544.916	764.2	756.747	1080.8	2855.25	998.937	215.284	346.032	88.1579	52.9368	941.695	204.674	257.4	1382.73	1770.68	1032.55	1320.4	251.284	1545.26	434.368	820.811	241.526	914.916
2374.02	906.606	1105.47	993.564	177.266	1703.72	279.511	306.181	310.851	4491.87	2542.77	341.16	1937.15	343.319	1457.57	1950.61	697.011	5060.53	2265.31	1665.66	3425.96	2108.07	1942.03	2289.94	3786.3	1966.24	1808.5	766.585	1025.88	1029.54	1500.72	3723.99	1404.21	306.181	453.617	115.787	71.9894	1271.06	290.745	344.606	1839.67	2471.86	1454.49	1735.65	356.479	2047.71	592.138	1140.88	316.926	1242.27
3097.49	1185.56	1422.37	1264	229.946	2192.3	371.215	411.935	386.14	5717.3	3103.59	455.849	2447.65	438.495	1942.08	2559.18	911.559	6452.49	2900.1	2046.27	4555.48	2679.48	2609.42	2866.29	4810.16	2436.27	2266.29	1027.05	1289.13	1324.26	1979.94	4600.65	1869.61	411.935	567.839	144.914	93	1645.19	392.323	437.194	2320.54	3257.04	1938.1	2183.74	479.968	2556.74	765.624	1494.86	406.215	1594.88
3887.05	1494.71	1753.41	1550.5	285.815	2714.12	472.62	534.707	459.109	6973.88	3661.15	584.359	2993.08	543.88	2491.92	3224.41	1143.2	7940.03	3556.24	2403.62	5838.8	3255.72	3368.34	3480.79	5846.35	2916.97	2722.91	1321.15	1533.3	1637.13	2503.6	5405.32	2386.7	534.707	682.739	176.946	116.196	2061.38	507.348	533.37	2808.93	4117.58	2480.64	2625.16	618.293	3046.66	950.641	1883.86	496.63	1967.82
4715.44	1826.38	2088.01	1859.36	343.736	3252.71	583.747	675.022	529.967	8234.02	4240.6	729.626	3597.86	658.901	3103.51	3938.27	1406.95	9485.91	4222.76	2734.26	7275.45	3844.51	4213.08	4077.34	6860.51	3342.21	3185.89	1649.88	1768.22	1963.78	3096.67	6087.52	2946.25	675.022	799.824	212.923	142.132	2499.33	635.341	646.78	3297.14	5056.52	3075.21	3034.82	773.857	3493.47	1142.26	2295.78	584.967	2340.42
5554.15	2179.64	2415.71	2193.13	401.589	3798.57	703.111	831.867	598.644	9481.92	4860.3	889.244	4268.59	778.856	3778.79	4701.7	1732.64	11008.5	4896.72	3045.31	8856.77	4439.09	5139.53	4655.11	7825.57	3753.36	3637.39	2013.88	1996.23	2301.99	3737.21	6559.63	3534.7	831.867	918.144	252.589	169.444	2940.79	778.122	767.733	3755.83	6052.56	3716.48	3434.53	947.789	3886.13	1337.27	2737.29	673.5	2708.84
6391.91	2557.15	2730.16	2546.03	459.73	4347.22	828.258	1004.79	664.27	10742.6	5458.12	1058.4	4973.78	899.798	4508.53	5512.1	2091.21	12473.1	5558.27	3343.06	10575.9	5055.44	6146.49	5181.64	8715.76	4122.42	4050.98	2408.63	2215.11	2651.27	4413.01	6901.93	4150.17	1004.79	1035.66	296.135	198.607	3416.51	932.809	901.899	4187.2	7086.78	4404.65	3798.15	1139.11	4224.2	1535	3195.11	763.528	3090.02
7230.01	2955.18	3023.82	2896.88	515.693	4886.36	958.352	1195.97	726.716	12016.6	6072.9	1240.64	5717.99	1013.52	5296.68	6373.28	2480.2	13915	6184.32	3629.3	12430	5695.15	7219.58	5712.11	9504.52	4447.27	4404.41	2834.56	2419.02	3007.39	5130.68	7073.49	4805.55	1195.97	1149.28	341.398	228.591	3893.66	1100.77	1049.52	4606.56	8143.53	5136.95	4135.68	1349.28	4512.15	1731.2	3662.74	857.42	3486.66
8059.12	3355.51	3297.18	3245.95	568.609	5412.15	1092.44	1401.36	785.897	13282.6	6721.31	1435.1	6517.03	1119.97	6149.64	7295.08	2879.72	15350.9	6780.49	3910.05	14420.4	6364.78	8363.57	6205.05	10195.1	4715.67	4700.55	3286.87	2600.8	3373.51	5871.89	7051.07	5463.34	1401.36	1254.94	389.678	261.069	4342.17	1281.29	1208.07	5015.07	9200.51	5905.56	4450.32	1574.97	4761.13	1922.17	4136.83	953.126	3898.9
8866.95	3777.93	3543.83	3587.92	617.547	5920.28	1228.69	1623.42	843	14521.1	7445.07	1643.56	7342.76	1233.09	7065.15	8282.97	3313.49	16763.2	7332.76	4195.03	16538.6	7075.06	9577.69	6705.14	10740.5	4957.03	4886.62	3770.27	2760.65	3748.7	6634.07	6830.78	6116.24	1623.42	1356.5	441.616	296.081	4789.38	1472.78	1369.92	5401.93	10244	6703.51	4753.4	1814.66	4962.57	2102.87	4616.49	1024.42	4309.57
9633.65	4217.95	3771.92	3924.59	660.8	6413.68	1366.71	1859.87	900.259	15701.2	8153.65	1864.04	8198.21	1351.14	8036.49	9327.98	3799.35	18161.8	7798.31	4490.12	18792.1	7821.91	10868.3	7177.91	11158.1	5166.07	4999.79	4272.26	2897.27	4132.81	7407.52	6472.18	6759.32	1859.87	1448.61	473.682	334.318	5225.73	1673.58	1538.25	5748.06	11284	7538.06	5035.61	2074.39	5118.89	2272.49	5109.79	1094.71	4729.78
10362.8	4668.74	3980.04	4237.85	699.107	6915.45	1504.19	2107.01	958.5	16835.5	8815.44	2098.38	9110.54	1465.14	9071.5	10438.7	4319.74	19541.5	8165.02	4804.45	21172	8609.5	12245.2	7597.37	11513.3	5352.11	5068.62	4800.32	3012.55	4526.26	8198.94	5963.96	7402.43	2107.01	1531.95	508.179	373.095	5616.99	1887.57	1714.88	6059.11	12316.1	8398.58	5343.99	2351.83	5236.75	2432.79	5598.77	1157.38	5155.24
11045.1	5113.19	4175.24	4533.77	730.795	7439.84	1639.02	2373.45	1019.34	17887.7	9462.89	2351.98	10059	1585.59	10169.2	11619	4854.52	20858.5	8430.39	5147.25	23665.6	9436.1	13706.6	7960.51	11817.2	5548.92	5105.39	5342.24	3113.2	4921.41	8999.02	5375.12	8041.86	2373.45	1609.99	545.771	412.675	5972.2	2111.94	1900.42	6324.02	13344.9	9279.14	5663.66	2647.23	5322.53	2580.42	6078.93	1216.64	5586.98
11694	5552.34	4367.05	4813.84	757.207	7985.88	1774.04	2655.32	1082.72	18870.3	10120.4	2618.34	11064.9	1709.7	11328.3	12851.4	5406.79	22127.7	8577.29	5515.65	26264.5	10308.2	15264.6	8303.57	12094.2	5731.82	5117.7	5899.27	3202.11	5314.91	9802.34	4751.18	8657.84	2655.32	1681.38	585.317	454.305	6314.68	2345.05	2091.66	6541.16	14373.8	10185	5977.93	2958.78	5383.18	2716.39	6570.15	1276.02	6004.89
12285.4	6000.57	4553.68	5088.59	777	8549.46	1905.77	2957.26	1149.35	19816.9	10792.4	2900.63	12104.9	1837.62	12551.1	14139.9	6009.91	23364.5	8628.68	5915.17	28986.8	11222.9	16916.6	8653.62	12392.6	5890.77	5097.11	6470.69	3283.51	5709.7	10598.3	4045.43	9254.1	2957.26	1750.01	625.926	497.951	6635.52	2589.72	2295.79	6704.38	15401.8	11122.7	6313.54	3282.62	5425.3	2840.88	7048.77	1338.99	6426.12
12831.6	6454.66	4737.81	5346.27	792.025	9128.5	2035.15	3275.93	1219.78	20718.6	11479.2	3194.3	13208.7	1968.46	13834.1	15493.8	6648.81	24514.7	8596.46	6343.84	31820	12177.7	18665.7	9001.19	12715.2	6036.04	5037.71	7053.3	3356.03	6105.16	11377.1	3373.07	9827.39	3275.93	1823.09	667.938	546	6911.14	2849.38	2502.95	6793.51	16403	12083.9	6676.48	3624.53	5458.39	2954.01	7508.23	1376.54	6827.93
13310.2	6935.53	4907.52	5587.73	801.165	9729.3	2160.66	3614.37	1295.48	21582.7	12158.6	3504.82	14384.8	2096.61	15174.3	16912.3	7310.32	25573.2	8508.82	6800.46	34772	13171.8	20505.2	9378.01	13045.3	6156.05	4964.56	7641.96	3425.23	6500.14	12140.1	2822.95	10364.3	3614.37	1899.37	710.266	594.848	7156.62	3114.81	2721.28	6833.77	17370.4	13067.2	7045.89	3980.7	5481.46	3055.59	7942.24	1410.95	7233.46
13708.8	7434.23	5072.37	5809.71	805.487	10408.1	2282.32	3970.64	1376.18	22448.7	12861.6	3832.27	15570.2	2230.38	16572	18392.5	7986.69	26499.6	8378.47	7292.08	37805.9	14187.5	22444.6	9787.56	13369.3	6252.96	4871.35	8237.33	3495.06	6889.81	12861.1	2416.05	10873.5	3970.64	1981.55	753.744	644.91	7363.03	3389.5	2946.9	6850.32	18294.5	14071.9	7419.97	4352.71	5494.9	3149.68	8342.69	1467.5	7638.04
14024.9	7936.79	5231.38	6005.43	807.143	11110.7	2400.77	4348.01	1462.73	23348.7	13591.4	4168.18	16803.1	2378.77	18027.6	19907.1	8694.84	27273.1	8227.71	7807.48	40865.4	15210.2	24485.1	10250.5	13691.6	6334.84	4771.25	8837.31	3565.65	7264.56	13521.1	2141.42	11341.4	4348.01	2068.45	797.636	697.078	7532.49	3673.88	3178.66	6849.52	19177.4	15092.3	7792.21	4738.79	5501.55	3235.4	8724.51	1532.29	8022.82
14292.4	8461.72	5382.72	6157.12	809.224	11840.6	2515.54	4739.45	1555.37	24286.2	14271.1	4509.11	18112.2	2530.22	19551.5	21453.5	9425.24	27968.6	8093.11	8346.17	44018.4	16221.6	26640.1	10740.3	13996.9	6402.07	4596.68	9441.74	3636.28	7623.46	14087.4	2075.2	11751.9	4739.45	2165.7	841.513	750.921	7635.11	3972.89	3414.25	6817.57	20021.1	16125.7	8143.58	5139.29	5483.07	3315.37	9094.88	1610.36	8412.86
14507.5	9017.6	5514.19	6273.07	811.773	12589.5	2626.13	5147.87	1652.53	25265.4	14927.2	4866.08	19521.4	2689.01	21126.4	23037.1	10164.8	28502.8	7975.01	8905.56	47277.1	17212.5	28906.2	11263.9	14307.2	6459.21	4396.49	10058.3	3704.16	7967	14563.8	2166.75	12091.3	5147.87	2265.51	884.933	804.88	7738.08	4284.67	3649.11	6774.37	20807.3	17157.3	8488.73	5555.72	5451.23	3390.91	9451.88	1696.84	8791.59
14651.3	9601.27	5620.07	6342.59	815.676	13363.8	2731.35	5573.19	1754.5	26311.3	15607.4	5237.16	21001.3	2839.58	22750.5	24649.2	10956.6	28873.9	7867.3	9484.66	50618.9	18181.2	31284	11856.8	14602.9	6518.07	4204.85	10682.7	3767.27	8305.41	14986.5	2412.57	12372.3	5573.19	2379.68	931.176	860.973	7778.42	4607.31	3879.65	6731.34	21534.6	18201.4	8800.78	5988.27	5412.24	3463.81	9778.88	1783.99	9157.39
14739.6	10209.1	5699	6366.78	822.479	14156.5	2831.27	6017.32	1855.49	27426.2	16237	5619.04	22550.6	3000.34	24428.9	26294.2	11769.4	29133.8	7752.3	10074.8	53971.2	19106	33770.7	12518.9	14822.8	6558.56	4026.9	11306	3820.74	8641.81	15342.5	2807.23	12593.9	6017.32	2507.34	981.329	917.11	7770.82	4943.44	4109.81	6681.32	22210.6	19251.7	9081.3	6433.63	5379.81	3531.53	10086.1	1886.47	9517.55
14755.6	10845.5	5750.26	6418.89	831.792	14964.2	2927.94	6484.38	1953.19	28596.7	16795.1	6015.32	24206.9	3145.64	26151.1	27974.8	12647.4	29214.9	7627.03	10652	57341.8	20000.3	36354.7	13160.6	14942.4	6608	3873.17	11937.7	3850.54	8967.36	15565.7	3289.28	12754.7	6484.38	2645.33	1029.24	976.208	7788.96	5286.61	4332.85	6615.76	22848.9	20294.1	9303.97	6904.24	5367.04	3592.06	10388.3	1987.62	9852.15
14699.3	11502.3	5771.08	6539.17	842.93	15774.5	3020.63	6972.77	2046.79	29804.7	17276.8	6428.24	25883.3	3281.32	27939.2	29702	13581.1	29096.9	7481.76	11210.4	60763.4	20851	39017.2	13804.4	14969.2	6667	3759.24	12574.7	3865.52	9277.44	15744.7	3839.54	12861.8	6972.77	2798.92	1078.79	1037	7775.69	5646.94	4554.14	6530.07	23437.8	21328	9466.35	7387.77	5376.49	3640.56	10668.6	2100.07	10182.4
14597.5	12174.8	5751.97	6648.36	857.029	16586.3	3105.54	7479.63	2136.39	31071.6	17695.8	6862.04	27482.7	3403.87	29784.9	31472.3	14530.5	28877.1	7307.64	11749	64228.7	21652.4	41762.9	14502	14970.8	6752.49	3678.77	13202.4	3853.9	9565.74	15821.1	4397.36	12910.6	7479.63	2962.43	1129.09	1100.76	7727.86	6016.46	4774.96	6422.6	23970.1	22359.2	9585.31	7894.87	5406.73	3676.87	10943.7	2228.3	10494.6
14434.1	12875.1	5688.42	6737.58	873.783	17413.6	3179.13	8001.54	2226.62	32397.5	18077.6	7311.32	29164.7	3514.59	31695	33322.7	15427	28639.4	7141.74	12253.2	67705.2	22414.9	44599.1	15196.4	14933.8	6868.68	3633.57	13822.3	3808.93	9845.03	15861.6	4931.38	12897.6	8001.54	3131.1	1181.25	1167.25	7692.41	6394.97	5000.32	6289.04	24477	23395	9631.58	8417.7	5463.1	3694.39	11202.9	2370.33	10815.7
14181.4	13598.5	5586.44	6742.12	892.5	18262.3	3241.71	8535.97	2313.5	33749.4	18416.1	7777.75	30807.6	3626.71	33674.1	35216.5	16356.5	28327	7014.63	12713.2	71159.5	23113.8	47504.6	15911.9	14827.6	7005.29	3623.26	14434.1	3736	10105.7	15828.1	5426.12	12818.4	8535.97	3306.59	1235.68	1237.49	7646.16	6784.28	5234.68	6132.81	24925.5	24420	9639.62	8959.57	5529.54	3698.81	11434.6	2521.72	11107.2
13926.2	14354.5	5442.46	6668.73	914.493	19126.9	3293.15	9094.69	2393.69	35118.1	18727.3	8263.64	32461.1	3755.85	35718.2	37136.8	17350.7	27961.1	6920.96	13113.1	74627.9	23769.5	50486.1	16680.1	14701.3	7188.55	3655.1	15032.5	3632.4	10335.7	15786.4	5832.48	12687.7	9094.69	3480.24	1290.81	1309.43	7548.82	7180.97	5477.39	5960.43	25318.7	25406.4	9563.55	9516.1	5595.99	3684.01	11529.7	2682.25	11371.2
13684.6	15142.2	5262.82	6562.44	938.667	20007.4	3332.8	9660.86	2471.79	36521.5	19027.3	8768.09	34175.4	3862.11	37823.2	39087.2	18364.1	27525.3	6856.55	13461.7	78163.6	24385.3	53549.1	17467.5	14593.6	7387.88	3729.94	15621.8	3471.86	10532.6	15687.6	6100.65	12516.5	9660.86	3642.74	1347.58	1384.32	7406.21	7584.59	5711.62	5787.45	25641.3	26337.1	9449.95	10090.5	5664.45	3645.97	11614.1	2845.35	11595.1
13452.9	15961.5	5059.95	6410.51	963.569	20912.5	3364.06	10244.6	2540.49	37976.5	19315	9286.4	35970.9	3937.43	39980.1	41098.6	19386.8	27069.9	6811.18	13762.8	81744.3	24946.3	56687.2	18260.4	14515.9	7613.42	3847.35	16211.5	3312.05	10694.3	15562.3	6183.06	12311.4	10244.6	3790.88	1407.92	1460.8	7295.12	7995.8	5939.6	5619.83	25882	27229.2	9293.83	10683.1	5738.11	3588.05	11653.7	3015.65	11783
13244.4	16820.4	4835.25	6211.56	990.75	21832.3	3388.48	10845.8	2598.67	39486	19563.2	9819.39	37737.8	3986.67	42158.3	43181.4	20423.7	26649.4	6796.14	14007.9	85349.1	25455.6	59902.3	19057.3	14473.8	7861.62	3990.3	16807.1	3154.06	10822.5	15374.6	6128.83	12061.8	10845.8	3930.22	1471.88	1541.92	7162.69	8418.22	6160.73	5465.5	26032	28060.9	9117.06	11290.8	5809.2	3497.39	11659.6	3202.27	11925.7
13059.2	17704	4596.48	6020.95	1020.86	22770.7	3405.97	11466.9	2641.62	41048.9	19766.7	10373.6	39613.6	4028.95	44383.2	45316.9	21550.4	26383.8	6797.86	14211.3	89059.7	25812.7	63158.7	19841.6	14524.5	8143.03	4145.25	17415.8	3002.22	10926.9	15194.6	5899.56	11776.5	11466.9	4056.35	1533.83	1624.57	7081.14	8844.35	6384.73	5330.21	26087.3	28832.6	8944.17	11915.1	5879.9	3379.79	11624.3	3388.62	12041.7
12927	18599.6	4360.82	5850.69	1052.31	23725.2	3414	12100.2	2660.18	42629.6	19940.8	10933.4	41483.8	4084.23	46640.3	47410.4	22691.1	26281	6834.27	14391.5	92821.5	26095.7	66461.2	20598.7	14592.3	8440.74	4311.34	18033.6	2859.58	11002.5	14991.6	5598.98	11454.2	12100.2	4166.47	1595.94	1709.11	6969.74	9274.74	6616.16	5211.16	26028.4	29520.4	8816.56	12545.9	5944.74	3239.85	11545.2	3577.92	12175
12816.9	19510	4122.61	5708.74	1085.89	24714.5	3413.74	12757	2658.26	44202.5	20061.1	11522.9	43331.3	4157.28	48906.1	49455.2	23851.7	26322.7	6920.77	14550.8	96622.4	26312.4	69836.6	21335.4	14679.3	8752.39	4466.59	18651.1	2719.95	11055.8	14753.7	5173.59	11103.5	12757	4259.85	1660.95	1794.3	6829.75	9714.61	6861.74	5103.05	25835.5	30119.2	8672.34	13192	5990.1	3100.1	11421.7	3774.9	12309.2
12760.8	20450.1	3876.7	5597.67	1119.82	25705	3401.58	13418.7	2648.55	45789.7	20128.5	12116.8	45207.1	4244.75	51215.8	51403.5	25006	26512.9	7052.2	14700.7	100490	26462.5	73281.3	22084.5	14771	9059.43	4611.12	19265.8	2587.53	11077.4	14495.8	4673.8	10717	13418.7	4335.35	1724.33	1880.35	6716.37	10160.3	7108.5	5005.43	25492.5	30586.5	8518.02	13850.8	6001.52	2960.17	11247	3983.65	12443
12731.8	21418.5	3614.86	5486.41	1155.59	26730.4	3383.66	14097.9	2631.39	47339.3	20126.7	12717.7	47126.8	4347.59	53544	53315.9	26172.1	26884.7	7256.98	14887.9	104319	26558.2	76765.6	22836.2	14834.3	9368.02	4730.53	19873.7	2466.17	11072.5	14250.6	4141.47	10294.6	14097.9	4388.8	1785.97	1971.75	6652.75	10600.6	7363.31	4931.2	25039.8	30981.2	8381.76	14523.2	5967.61	2802.42	11025	4213.46	12566.8
12717.7	22402.6	3350.09	5375.05	1189.71	27780.4	3353.66	14786.6	2612.62	48865.1	20045.7	13333.7	49032.5	4452.67	55897.2	55208.7	27389.9	27483.9	7508.53	15103	108124	26619.2	80284.2	23583.1	14860	9667.14	4821.97	20476	2356.19	11060.4	13998.9	3610.6	9848.98	14786.6	4428.33	1847.28	2067.28	6639.98	11042.5	7625.09	4882.19	24497.9	31253.9	8257.78	15206.4	5879.81	2635.97	10755.2	4442.6	12759.3
12736.5	23422.4	3091.42	5288.25	1223.04	28836.2	3311.98	15476.5	2594.23	50373.6	19985.7	13942.6	51054.1	4552	58263.3	57063.4	28641	28284.6	7780.04	15340.2	111938	26649.6	83854.9	24360.2	14833.5	9945.3	4884.09	21074.6	2262.51	11035	13728.9	3237.82	9365.47	15476.5	4455.39	1910.37	2165.46	6626.42	11491.5	7899.37	4847.93	23862.5	31441.6	8325.53	15906.1	5741.84	2458.79	10467.1	4673.7	12968.4
12806.5	24464.5	2848.5	5213.77	1254.41	29872.2	3260.45	16189.5	2589.41	51887.1	19935.5	14568.9	53037.1	4654.32	60647.6	58903.5	29913.4	29231.8	8045.59	15682.9	115785	26697.8	87462.1	25178.8	14687.9	10183.1	4907.45	21673.3	2179.77	10983.3	13460	2987.52	8866.68	16189.5	4480.5	1974.2	2267.7	6667.21	11941	8176.64	4819.84	23136.1	31552.8	8513.39	16625.9	5558.59	2273.52	10171	4899.12	13200.6
12950.4	25553.1	2622.89	5168.15	1286.51	30926.1	3195.71	16920	2599.35	53341.6	19848.1	15204.9	55070.2	4752.22	63058.9	60745.5	31222	30272	8305.62	16042.3	119667	26622.9	91093	26015.6	14433.9	10374.9	4890.55	22274.2	2115.04	10926.4	13228	2765.18	8364.69	16920	4508.67	2040.16	2373.13	6733.25	12398.9	8459.22	4789.22	22334.8	31577.2	8656.45	17362.7	5336.27	2086.78	9868.36	5136.6	13437.1
13157.6	26664.5	2407.3	5149.93	1320.41	32001	3124.46	17651.4	2624.83	54727.9	19762.5	15847.8	57193.4	4864.02	65499.6	62548.1	32546.1	31341.6	8593.35	16388.6	123564	26400.9	94778	26892.7	14133.5	10512.4	4831.67	22858.7	2068.57	10849.5	13022.6	2680.93	7855.87	17651.4	4546.3	2112.11	2479.37	6816.59	12861.3	8735.15	4754.89	21481.9	31532.9	8835.76	18114.5	5095.69	1899.28	9521.94	5383.65	13665.5
13459.4	27803.7	2209.91	5165.57	1353.96	33120.3	3045.72	18384.5	2661.64	55966	19669.2	16504.8	59401.2	4992.98	67893.2	64334.3	33911.7	32446.6	8932.34	16604.2	127428	26058.1	98456.1	27822.2	13825	10589.2	4723.6	23434.1	2038.34	10767.2	12824.4	2664.53	7352.15	18384.5	4609.15	2187.25	2586.96	6905.28	13328.8	8995.17	4750.94	20555.4	31428.4	9045.85	18883.8	4846.72	1719.26	9171.15	5638.47	13880.4
13825.1	28985	2055.23	5216.13	1388.6	34295.6	2958.75	19124.3	2703.9	57165.9	19558.4	17179.2	61597.9	5129.44	70269.8	66081.7	35319.6	33628.6	9273.08	16754.4	131367	25619.8	102161	28740.8	13545.5	10606.3	4574.38	23997.5	2022.27	10686.9	12634.2	2771.37	6859.67	19124.3	4686.08	2267.98	2696.46	6975.73	13804.3	9245.56	4799.73	19509.8	31270	9180.19	19661.8	4603.6	1554	8861.94	5901.06	14072.5
[truncated: 76 more columns]

## Sheet: SuppFig6C- DirAuto Plotted Avg
Source data for Supp Fig. 6C: Plotted Average Directional Autocorrelation (Dir_Auto) and SEM. Dir_Auto calculated using DiPer software (Gorelik et al 2013) from trajectories show in Fig. 2B
Control(GoF) (Dir_Auto)				GoF (Dir_Auto)
Time(min)	Avg	SEM		Time(min)	Avg	SEM
0	1	0		0	1	0
5	0.70064	0.00683		5	0.6398	0.00696
10	0.63635	0.00728		10	0.60018	0.00704
15	0.56514	0.00792		15	0.54991	0.00735
20	0.50745	0.00836		20	0.49872	0.00779
25	0.44825	0.0089		25	0.45746	0.00807
30	0.37576	0.00947		30	0.41002	0.00841
35	0.3206	0.00982		35	0.37937	0.00866
40	0.28043	0.01011		40	0.34937	0.00885
45	0.2458	0.01032		45	0.34087	0.00891
50	0.21242	0.01064		50	0.31554	0.00909
55	0.17114	0.01079		55	0.28849	0.00924
60	0.14702	0.01087		60	0.26043	0.00937
65	0.13393	0.01105		65	0.23854	0.00954
70	0.12444	0.0111		70	0.22567	0.00962
75	0.10893	0.01124		75	0.20646	0.00972
80	0.09336	0.01133		80	0.18933	0.00975
85	0.08517	0.01134		85	0.17183	0.00981
90	0.08731	0.01137		90	0.17116	0.00984
95	0.0874	0.01136		95	0.1483	0.00998
100	0.08384	0.01137		100	0.1482	0.01005
