# Supplementary material for: Spatiotemporal dynamics of PIEZO1 localization controls keratinocyte migration during wound healing
Source: eLife. 2021 Sep 27;10:e65415. doi: 10.7554/eLife.65415 (PMC8577841; doi:10.7554/eLife.65415)
Supplement: Figure 1—figure supplement 2—source data 1. — qRT-PCR data shown in Figure 1—figure supplement 2 from primary neonatal keratinocytes of Piezo1 and Piezo2 mRNA expression relative to Gapdh. [file elife-65415-fig1-figsupp2-data1.xlsx]

## Sheet: Supp Fig 2 qRTPCR
		cT
							Minus K14
		K14	GAPDH	Piezo1	Piezo2		GAPDH	Piezo1	Piezo2		% Piezo1 expression relative to GAPDH						% Piezo 2 expression relative to GAPDH
Run 1	Cre neg (Control)	19.5993	22.4612	27.9615	34.8345		2.86189	8.3622	15.2352		Con	5.50032	-4.50032	0.0441845	2.20922		Piezo2 Con	12.3733	-11.3733	0.000376948	0.0188474
Run 2	Cre neg (Control)	19.0133	22.5527	27.5167	34.7899		3.53937	8.50339	15.7766		Con	4.96403	-3.96403	0.064078	3.2039		Piezo2 Con	12.2372	-11.2372	0.000414243	0.0207122
		Plot Supp Fig 2
		Piezo1	2.20922	3.2039
		Piezo2	0.0188474	0.0207122
