# Supplementary material for: Spatiotemporal dynamics of PIEZO1 localization controls keratinocyte migration during wound healing
Source: eLife. 2021 Sep 27;10:e65415. doi: 10.7554/eLife.65415 (PMC8577841; doi:10.7554/eLife.65415)
Supplement: Figure 1—figure supplement 3—source data 1. — (Sheets 1,2) Normalized scratch closure data used to create (Sheet 1) control and (Sheet 2) conditional knockout (cKO) Cumming plots shown in Figure 1—figure supplement 3. [file elife-65415-fig1-figsupp3-data1.xlsx]

## Sheet: SFig3A Con+Yoda1 Conc Curve
Control (cKO background) +Yoda1
Normalized Scratch Area
DMSO	100nM	2uM	4uM
1.47057	0.68588	0.0361	0.00117
1.10445	1.23612	0.13387	1.05033
0.85093	0.59675	-0.2446	0.59834
0.77531	0.67602	-0.1515	0.26467
0.79875	1.30753	-0.17129	0.26687
0.87057	1.8112	-0.28936	-0.2539
1.12943	1.1359	-0.11074	-0.13391
0.75216	1.22685	-0.09823	-0.05912
0.4314	1.22989	-0.12933	-0.35456
0.65057	1.05195	0.07414	-0.31784
2.16587		-0.35893	0.30215
0.86241		-0.39593	0.27945
1.24539		0.12929	0.33753
0.8922		0.89551	0.10811
0.9056		0.90863	0.09126
1.0944		0.90426	0.08449
		0.75593
		0.86566
		0.65729
		0.80659
		0.69464
		0.72958
		0.80291

## Sheet: SFig3B cKO+Yoda1 Conc Curve
Piezo1-cKO+Yoda1
Normalized Scratch Area
DMSO	4uM
0.74355	0.89935
0.97299	0.7096
1.40385	0.80591
1.41565	0.91227
1.14105	0.76719
0.91335	0.68222
0.81341	2.25868
0.50123	0.9932
1.49877	0.84221
1.71948	1.2625
0.30313	0.46783
0.70144
1.27594
