# Supplementary material for: Spatiotemporal dynamics of PIEZO1 localization controls keratinocyte migration during wound healing
Source: eLife. 2021 Sep 27;10:e65415. doi: 10.7554/eLife.65415 (PMC8577841; doi:10.7554/eLife.65415)
Supplement: Figure 1—source data 1. — (Sheet 1) qRT-PCR data from primary neonatal keratinocytes of Piezo1 mRNA expression in Krt14+/+ Piezo1fl/fl (Con) and Krt14Cre/+;Piezo1fl/fl (conditional knockout [cKO]) mice seen in Figure 1B. (Sheet 2) Flicker fluorescence ratio changes (ΔF/F0) from a region of interest, plotted against time shown in Figure 1C from ControlcKO (left) and Piezo1-cKO (right) keratinocytes. (Sheet 3) Data plotted in Figure 1E showing frequency of Ca2+ flickers in Piezo1-cKO and respective ControlcKO cells. (Sheets 4, 5) Similar to Sheets 2, 3 but using keratinocytes from ControlGoF and Piezo1-GoF mice for data shown in Figure 1F,H. (Sheet 6) Data used for creating Cumming plot in Figure 1J showing wound area of Piezo1-cKO and Piezo1-GoF groups at day 6 relative to control (Con) littermates. (Sheet 7) Normalized plot data seen in Figure 1L showing scratch wound closure in monolayers of keratinocytes isolated from: ControlcKO vs. Piezo1-cKO mice, ControlGoF vs. Piezo1-GoF mice and DMSO-treated vs. 4 µM Yoda1-treated ControlcKO monolayers. [file elife-65415-fig1-data1.xlsx]

## Sheet: Figure 1B qRTPCR
						dCt values					% normalized to WT piezo1
						sample	run1	run2		sample	run1	run2
						Cre neg piezo1	8.3622	8.5034		Cre neg	100	100
						Cre pos piezo1	14.1371	12.09		Cre pos	1.82635	5.05555
Run 1					Run 2
Cre positive-Piezo1					Cre positive-Piezo1
Ct-K14	Ct-piezo1	Delta Ct			Ct-K14	Ct-piezo1	Delta Ct
19.524	33.6611	14.1371			19.7327	31.8227	12.09
Cre Negative-Piezo1					Cre Negative-Piezo1
Ct-K14	Ct-piezo1	Delta Ct			Ct-K14	Ct-piezo1	Delta Ct
19.5993	27.9615	8.3622			19.0133	27.5167	8.5034

## Sheet: Figure 1C Con(cKO) v cKO trace 
Representative Calcium flicker trace plotted in Fig 1C
Time(s)	Control(cKO)	cKO
0.01	1.01941	1.01989
0.02	1.00795	1.00582
0.03	0.98552	1.01286
0.04	0.99264	0.99927
0.05	0.99678	1.0057
0.06	1.01939	1.0248
0.07	0.9859	1.05453
0.08	1.02328	1.03241
0.09	0.98796	1.02644
0.1	1.00459	1.01419
0.11	0.98198	1.00704
0.12	1.07084	1.01851
0.13	1.0426	0.98406
0.14	1.00878	0.99201
0.15	1.01511	1.00295
0.16	1.02258	0.97449
0.17	1.02209	0.99719
0.18	1.0196	0.99236
0.19	1.00742	0.99565
0.2	1.01776	0.99862
0.21	1.00656	1.00402
0.22	1.00085	0.9936
0.23	1.00775	1.01044
0.24	1.00777	1.00823
0.25	0.98284	1.01115
0.26	0.99988	1.01114
0.27	0.97575	1.01592
0.28	1.01219	1.00052
0.29	0.98748	0.98888
0.3	0.99201	1.00916
0.31	0.98559	0.98845
0.32	0.99985	0.98904
0.33	0.98813	0.99098
0.34	0.99787	1.00755
0.35	0.98861	0.99721
0.36	0.98488	0.98601
0.37	0.99636	0.98306
0.38	0.9925	1.01523
0.39	0.98586	0.99589
0.4	0.98387	1.00403
0.41	0.9896	0.98602
0.42	1.00722	0.98472
0.43	0.99538	0.99141
0.44	0.99411	0.98663
0.45	0.98606	0.99588
0.46	0.99866	0.98476
0.47	0.98847	0.97397
0.48	0.98733	0.98853
0.49	0.99204	0.992
0.5	0.99371	0.97617
0.51	0.97808	0.99049
0.52	1.06079	0.9924
0.53	1.03173	1.00316
0.54	1.0182	0.98063
0.55	1.00351	0.97459
0.56	1.00131	0.98009
0.57	0.98318	0.98694
0.58	0.99811	0.97707
0.59	0.99182	0.99566
0.6	0.99686	0.97164
0.61	0.98839	0.98396
0.62	0.98575	0.98004
0.63	1.00145	0.9877
0.64	0.98674	0.98033
0.65	0.99488	0.98231
0.66	0.99051	0.97487
0.67	0.99413	0.97119
0.68	0.98834	0.96207
0.69	0.99722	0.9612
0.7	0.99204	0.97337
0.71	0.97728	0.98576
0.72	0.98337	0.99046
0.73	0.9725	0.96477
0.74	0.9916	0.9919
0.75	0.94638	0.99014
0.76	1.00669	0.97676
0.77	0.98614	0.98735
0.78	1.00381	0.99741
0.79	0.98742	0.98592
0.8	1.00044	0.98545
0.81	0.98454	0.97299
0.82	0.98774	0.97473
0.83	0.98143	0.95889
0.84	0.97129	0.96972
0.85	0.99094	0.97723
0.86	0.95537	0.96816
0.87	0.96016	0.95423
0.88	0.98237	0.96658
0.89	0.98076	0.9567
0.9	0.99133	0.95324
0.91	0.95948	0.97981
0.92	0.99149	0.97067
0.93	0.959	0.98394
0.94	0.96815	0.95017
0.95	0.95073	0.98067
0.96	0.98519	0.97455
0.97	0.96754	0.96286
0.98	0.98372	0.96885
0.99	0.98177	0.95894
1	0.95849	0.96148
1.01	0.96792	0.94949
1.02	0.96268	0.93169
1.03	0.98076	0.95008
1.04	0.95222	0.96685
1.05	0.97079	0.96369
1.06	0.98008	0.95046
1.07	0.97402	0.9656
1.08	0.97666	0.95796
1.09	0.9509	0.96559
1.1	0.99301	0.94581
1.11	0.94633	0.95718
1.12	0.98442	0.95916
1.13	0.96404	0.96392
1.14	0.97502	0.96568
1.15	0.96187	0.96365
1.16	0.97328	0.95261
1.17	1.0417	0.9686
1.18	1.00988	0.96586
1.19	0.99391	0.94969
1.2	1.0005	0.96283
1.21	0.97992	0.94946
1.22	0.97932	0.96755
1.23	0.97262	0.9273
1.24	0.99439	0.94433
1.25	0.97487	0.97182
1.26	0.98557	0.96296
1.27	0.97254	0.95823
1.28	0.99286	0.93728
1.29	0.98036	0.95077
1.3	0.97624	0.95444
1.31	0.96373	0.96134
1.32	0.96614	0.97314
1.33	0.96931	0.9621
1.34	0.96562	0.96704
1.35	1.02552	0.9557
1.36	1.09772	0.96019
1.37	1.1127	0.94102
1.38	1.10438	0.95498
1.39	1.05027	0.9445
1.4	1.01615	0.95651
1.41	1.01854	0.95491
1.42	1.02125	0.95721
1.43	1.00041	0.96028
1.44	1.01037	0.97865
1.45	0.98444	0.94989
1.46	0.98636	0.94973
1.47	0.98863	0.95598
1.48	0.97587	0.96808
1.49	0.98434	0.95126
1.5	0.98052	0.94951
1.51	0.9755	0.94893
1.52	0.96949	0.96222
1.53	0.98395	0.95723
1.54	0.97852	0.94733
1.55	0.96971	0.97003
1.56	0.96303	0.97472
1.57	0.97877	0.97125
1.58	0.95598	0.98714
1.59	0.96195	0.96373
1.6	0.9781	0.95001
1.61	0.95409	0.97689
1.62	0.95188	0.97233
1.63	0.9484	0.98135
1.64	0.96206	0.97087
1.65	0.96546	0.988
1.66	1.01283	0.96122
1.67	1.06024	0.96424
1.68	1.05077	0.96621
1.69	1.15646	0.9737
1.7	1.14175	0.96443
1.71	1.06333	0.96281
1.72	1.05723	0.9593
1.73	1.01612	0.96894
1.74	1.02551	0.96232
1.75	1.00793	0.97395
1.76	1.02081	0.96246
1.77	0.99979	0.96073
1.78	1.00666	0.96009
1.79	0.99144	0.94828
1.8	0.98957	0.95392
1.81	0.98105	0.95834
1.82	0.98124	0.9752
1.83	0.97497	0.9366
1.84	0.98276	0.98233
1.85	0.98591	0.95211
1.86	0.96569	0.96107
1.87	0.95821	0.95976
1.88	0.95903	0.95496
1.89	0.97381	0.95987
1.9	0.97423	0.95957
1.91	1.01352	0.96736
1.92	1.00146	0.94336
1.93	0.98081	0.96117
1.94	0.99083	0.96346
1.95	0.9659	0.95466
1.96	0.98462	0.95902
1.97	0.98661	0.97066
1.98	0.96957	0.9545
1.99	0.96955	0.9656
2	0.95283	0.95945
2.01	0.97196	0.94189
2.02	0.9582	0.95456
2.03	0.97209	0.95298
2.04	0.96306	0.9428
2.05	0.96802	0.9542
2.06	0.96065	0.96788
2.07	0.96043	0.9499
2.08	0.95715	0.94879
2.09	0.96512	0.97815
2.1	1.08484	0.96423
2.11	1.18509	0.94559
2.12	1.14424	0.93088
2.13	1.05399	0.9528
2.14	1.04982	0.95646
2.15	1.01316	0.93376
2.16	1.01223	0.95083
2.17	1.01235	0.97655
2.18	1.01195	0.95955
2.19	1.00617	0.95341
2.2	1.00778	0.95629
2.21	0.97817	0.95128
2.22	0.98327	0.94642
2.23	0.97865	0.94287
2.24	0.9815	0.95533
2.25	0.98242	0.95381
2.26	0.97268	0.94239
2.27	0.98252	0.95267
2.28	0.96725	0.96473
2.29	0.96751	0.94016
2.3	0.97272	0.93393
2.31	0.97882	0.94272
2.32	0.97602	0.93132
2.33	0.95617	0.95499
2.34	0.97876	0.95058
2.35	0.96461	0.94766
2.36	0.99237	0.94177
2.37	0.97233	0.93677
2.38	0.96988	0.9514
2.39	0.97452	0.94547
2.4	0.98197	0.96471
2.41	0.97611	0.95813
2.42	0.96222	0.94811
2.43	0.9655	0.94985
2.44	0.97169	0.93254
2.45	0.96435	0.9442
2.46	0.96676	0.94426
2.47	0.96244	0.95768
2.48	0.9683	0.93905
2.49	0.96076	0.95433
2.5	0.96512	0.96438
2.51	0.94846	0.96705
2.52	0.94797	0.93509
2.53	0.96196	0.94877
2.54	0.96863	0.94352
2.55	0.97175	0.92993
2.56	0.97196	0.94215
2.57	0.96357	0.95911
2.58	0.97499	0.95634
2.59	0.96559	0.94322
2.6	0.96303	0.96477
2.61	0.97098	0.94383
2.62	0.95243	0.94334
2.63	0.97464	0.93706
2.64	0.96338	0.93873
2.65	0.965	0.93179
2.66	0.95843	0.9501
2.67	0.96147	0.9645
2.68	0.97372	0.93843
2.69	0.95623	0.92748
2.7	0.96231	0.92986
2.71	0.96102	0.92337
2.72	0.96826	0.94032
2.73	0.96976	0.92904
2.74	0.94218	0.94674
2.75	0.95484	0.95538
2.76	0.94233	0.95188
2.77	0.93827	0.93011
2.78	0.9579	0.94807
2.79	0.9557	0.96117
2.8	1.09769	0.93218
2.81	1.08747	0.94858
2.82	1.01656	0.9462
2.83	1.026	0.94883
2.84	1.03775	0.95095
2.85	0.98396	0.9454
2.86	0.98514	0.95915
2.87	0.97824	0.94297
2.88	0.99523	0.95226
2.89	0.99636	0.9394
2.9	0.96273	0.93886
2.91	0.98783	0.94887
2.92	0.96034	0.93386
2.93	0.97524	0.92309
2.94	0.96969	0.92527
2.95	0.96248	0.9199
2.96	0.95818	0.9301
2.97	0.95402	0.96155
2.98	0.95788	0.94479
2.99	0.96041	0.93994
3	0.94792	0.95639
3.01	0.95016	0.94521
3.02	0.96867	0.93976
3.03	0.94487	0.93135
3.04	0.95959	0.93682
3.05	0.95347	0.9384
3.06	0.94738	0.93846
3.07	0.96611	0.94518
3.08	0.9534	0.96368
3.09	0.96317	0.95202
3.1	0.95923	0.9317
3.11	0.9518	0.94395
3.12	0.95091	0.93773
3.13	0.95325	0.9305
3.14	0.96461	0.93666
3.15	1.00622	0.94897
3.16	1.04464	0.92213
3.17	1.00514	0.93541
3.18	0.9635	0.94844
3.19	0.97781	0.95028
3.2	0.97699	0.94081
3.21	0.97631	0.93742
3.22	0.96768	0.9338
3.23	0.95732	0.94443
3.24	0.97427	0.94174
3.25	0.97205	0.93063
3.26	0.95616	0.94553
3.27	0.94775	0.92144
3.28	0.94177	0.96145
3.29	0.95281	0.93816
3.3	0.947	0.94222
3.31	0.95795	0.93025
3.32	0.96344	0.9509
3.33	0.95344	0.96135
3.34	0.95653	0.95107
3.35	0.94225	0.96637
3.36	0.95429	0.94387
3.37	0.94131	0.95561
3.38	0.95414	0.95218
3.39	0.95678	0.94765
3.4	0.95322	0.94949
3.41	0.96114	0.95408
3.42	0.95585	0.94487
3.43	0.95209	0.94293
3.44	0.94927	0.95963
3.45	0.95625	0.94449
3.46	0.96394	0.94749
3.47	0.95258	0.95173
3.48	0.95966	0.95547
3.49	0.94858	0.97337
3.5	0.97558	0.94824
3.51	0.93677	0.95838
3.52	0.94949	0.94429
3.53	0.93027	0.97612
3.54	0.94891	0.95774
3.55	0.95375	0.96842
3.56	0.93468	0.95925
3.57	0.96251	0.94374
3.58	0.92659	0.96736
3.59	0.93401	0.96287
3.6	0.93995	0.94181
3.61	0.95723	0.95819
3.62	0.9511	0.96598
3.63	0.94374	0.96931
3.64	0.95438	0.95223
3.65	0.92032	0.93711
3.66	0.93832	0.95092
3.67	0.93997	0.94742
3.68	0.98401	0.95557
3.69	0.96918	0.9612
3.7	0.94741	0.95855
3.71	0.94674	0.94995
3.72	0.93997	0.96953
3.73	0.96918	0.94737
3.74	0.95975	0.93617
3.75	0.95064	0.97049
3.76	0.93024	0.96663
3.77	0.94279	0.96904
3.78	0.96441	0.9537
3.79	0.9531	0.95566
3.8	0.95382	0.95706
3.81	0.96251	0.95164
3.82	0.94615	0.93494
3.83	0.93386	0.94842
3.84	0.95177	0.94429
3.85	0.91623	0.95251
3.86	0.94877	0.95096
3.87	0.93353	0.97683
3.88	0.92823	0.95781
3.89	0.934	0.95077
3.9	0.92913	0.95387
3.91	0.93595	0.94673
3.92	0.92988	0.94673
3.93	1.01774	0.94947
3.94	1.07771	0.95931
3.95	1.03203	0.96888
3.96	0.99128	0.97726
3.97	0.98742	0.96883
3.98	0.95757	0.95143
3.99	0.96284	0.95272
4	0.96803	0.9605
4.01	0.96437	0.94494
4.02	0.97786	0.94821
4.03	0.95639	0.9493
4.04	0.95211	0.96533
4.05	0.97124	0.96424
4.06	0.96323	0.96698
4.07	0.95779	0.95274
4.08	0.94179	0.97138
4.09	0.95992	0.97563
4.1	0.94647	0.97364
4.11	0.952	0.96538
4.12	0.92546	0.94561
4.13	0.94863	0.96442
4.14	0.95213	0.95905
4.15	0.91982	0.96533
4.16	0.95463	0.97344
4.17	0.92476	0.95447
4.18	0.95487	0.95364
4.19	1.02087	0.95725
4.2	1.02378	0.94911
4.21	0.99104	0.95291
4.22	0.98216	0.95334
4.23	0.96094	0.95465
4.24	0.95646	0.95697
4.25	0.96555	0.94909
4.26	0.95088	0.94992
4.27	0.96106	0.94534
4.28	0.94041	0.95139
4.29	0.94397	0.96704
4.3	0.954	0.95393
4.31	0.95285	0.9659
4.32	0.94908	0.95591
4.33	0.94335	0.93211
4.34	0.96243	0.94096
4.35	0.97945	0.94797
4.36	0.95865	0.94614
4.37	0.97196	0.95181
4.38	0.95752	0.94387
4.39	0.93686	0.95098
4.4	0.95498	0.9494
4.41	0.9419	0.94471
4.42	0.94921	0.92986
4.43	0.94626	0.93665
4.44	0.92413	0.93996
4.45	0.94333	0.93687
4.46	0.94195	0.93238
4.47	0.9552	0.92901
4.48	0.95131	0.91605
4.49	0.93736	0.9457
4.5	0.93489	0.94503
4.51	0.9338	0.94658
4.52	0.94207	0.93129
4.53	0.94703	0.94038
4.54	0.94622	0.93546
4.55	0.93629	0.96061
4.56	0.94406	0.92964
4.57	0.93371	0.95256
4.58	0.95049	0.943
4.59	0.94445	0.93658
4.6	0.9396	0.94252
4.61	0.94225	0.95618
4.62	0.94567	0.93534
4.63	0.9306	0.95567
4.64	0.93653	0.95466
4.65	0.90885	0.93507
4.66	0.92732	0.93108
4.67	0.94593	0.94396
4.68	0.92709	0.94039
4.69	0.94055	0.95295
4.7	0.92338	0.93786
4.71	0.9467	0.93805
4.72	0.9431	0.92524
4.73	0.9383	0.9416
4.74	0.9229	0.94247
4.75	0.94614	0.95273
4.76	0.93506	0.95391
4.77	0.94592	0.95745
4.78	0.93535	0.95199
4.79	0.95355	0.9541
4.8	0.94402	0.9365
4.81	0.92849	0.95296
4.82	0.93406	0.94607
4.83	0.94391	0.93724
4.84	0.94483	0.93484
4.85	0.9143	0.94139
4.86	0.98809	0.92288
4.87	0.96228	0.93888
4.88	0.93664	0.92921
4.89	0.9559	0.93911
4.9	0.9445	0.94231
4.91	0.94032	0.94731
4.92	0.94343	0.92971
4.93	0.95367	0.93409
4.94	0.94342	0.93726
4.95	0.94645	0.94552
4.96	0.94125	0.93793
4.97	0.94219	0.93572
4.98	0.92134	0.93463
4.99	0.92311	0.93802
5	0.93843	0.93572
5.01	0.94175	0.94104
5.02	0.93149	0.93269
5.03	0.92561	0.93362
5.04	0.93405	0.93178
5.05	0.93381	0.94219
5.06	0.91249	0.94086
5.07	0.95279	0.95081
5.08	0.94303	0.96946
5.09	0.94315	0.96239
5.1	0.92904	0.93351
5.11	0.93554	0.9596
5.12	0.94165	0.94571
5.13	0.94993	0.95437
5.14	0.9358	0.93371
5.15	0.93457	0.93826
5.16	0.93973	0.93749
5.17	0.94171	0.93823
5.18	0.94463	0.9325
5.19	0.91316	0.95574
5.2	0.92421	0.95209
5.21	0.92269	0.93942
5.22	0.95913	0.94413
5.23	0.96853	0.94003
5.24	0.94748	0.94278
5.25	0.95714	0.93313
5.26	0.93938	0.9475
5.27	0.93821	0.92239
5.28	0.9451	0.93998
5.29	0.93341	0.93586
5.3	0.93397	0.92751
5.31	0.93429	0.9393
5.32	0.93581	0.93355
5.33	0.93048	0.94111
5.34	0.94034	0.91679
5.35	0.93465	0.92147
5.36	0.93235	0.92565
5.37	0.94163	0.93882
5.38	0.94639	0.94658
5.39	0.93968	0.9356
5.4	0.92939	0.92957
5.41	0.95208	0.92226
5.42	0.93723	0.92189
5.43	0.94516	0.92512
5.44	0.94205	0.92652
5.45	0.93183	0.90489
5.46	0.92353	0.92147
5.47	0.97462	0.93325
5.48	0.95394	0.91234
5.49	0.9435	0.93061
5.5	0.94919	0.92841
5.51	0.94107	0.92961
5.52	0.95242	0.9124
5.53	0.93709	0.92625
5.54	0.93061	0.91881
5.55	0.93421	0.92313
5.56	0.93435	0.92577
5.57	0.93068	0.94107
5.58	0.92632	0.93758
5.59	0.94167	0.91268
5.6	0.94332	0.93702
5.61	0.93117	0.91826
5.62	0.93626	0.93791
5.63	0.94223	0.93332
5.64	0.95425	0.94139
5.65	0.93382	0.93382
5.66	0.93657	0.93723
5.67	0.93563	0.93926
5.68	0.92384	0.91858
5.69	0.92948	0.92881
5.7	0.92556	0.92904
5.71	0.92347	0.92973
5.72	0.93585	0.93069
5.73	0.91953	0.92038
5.74	0.92111	0.93636
5.75	0.94564	0.93516
5.76	0.91965	0.93243
5.77	0.94466	0.9367
5.78	0.92435	0.9581
5.79	0.94658	0.94365
5.8	0.93867	0.93884
5.81	0.93225	0.93467
5.82	0.95052	0.93432
5.83	0.92394	0.94426
5.84	0.9343	0.94971
5.85	0.94104	0.96429
5.86	0.91105	0.96761
5.87	0.91552	0.95859
5.88	0.92024	0.99372
5.89	0.92765	0.9736
5.9	0.94674	0.97582
5.91	1.02198	0.94356
5.92	1.04458	0.96131
5.93	0.99864	0.94963
5.94	0.97984	0.96643
5.95	1.05297	0.95969
5.96	1.08956	0.95975
5.97	1.03416	0.94406
5.98	0.99231	0.95765
5.99	0.99903	0.94224
6	0.98664	0.95142
6.01	0.98821	0.94942
6.02	0.96794	0.95529
6.03	0.95908	0.95524
6.04	0.9674	0.93927
6.05	0.94717	0.93866
6.06	0.93871	0.9555
6.07	0.95315	0.95357
6.08	0.93837	0.94285
6.09	0.95197	0.93594
6.1	0.95181	0.94175
6.11	0.96897	0.93859
6.12	0.94879	0.94987
6.13	0.94464	0.95923
6.14	0.94961	0.95781
6.15	0.94494	0.93838
6.16	0.93652	0.96118
6.17	0.9323	0.95598
6.18	0.93094	0.95616
6.19	0.93608	0.94669
6.2	0.94224	0.96413
6.21	0.9616	0.95277
6.22	0.94758	0.95241
6.23	0.94068	0.9496
6.24	0.9556	0.93638
6.25	0.93476	0.9494
6.26	0.93844	0.96915
6.27	0.94819	0.9585
6.28	0.9519	0.96143
6.29	0.93721	0.9757
6.3	0.92218	0.95731
6.31	0.92948	0.95163
6.32	0.94237	0.95687
6.33	0.94647	0.94822
6.34	0.94934	0.95813
6.35	0.93734	0.9596
6.36	0.94918	0.96292
6.37	0.93591	0.97208
6.38	0.92913	0.9727
6.39	0.92607	0.96681
6.4	0.9345	0.95006
6.41	0.94053	0.94794
6.42	0.93507	0.94657
6.43	0.92604	0.96484
6.44	0.9319	0.96021
6.45	0.93027	0.94916
6.46	0.93176	0.95526
6.47	0.94563	0.96312
6.48	0.92198	0.97082
6.49	0.93849	0.95944
6.5	0.93533	0.9678
6.51	0.94928	0.95634
6.52	0.94966	0.96739
6.53	0.94665	0.96194
6.54	0.99571	0.95652
6.55	0.96946	0.96506
6.56	0.95413	0.97452
6.57	0.94354	0.96642
6.58	0.94513	0.96888
6.59	0.94027	0.9487
6.6	0.92926	0.97751
6.61	0.94701	0.9639
6.62	0.94605	0.97457
6.63	0.95179	0.94689
6.64	0.92829	0.96172
6.65	0.99397	0.96785
6.66	0.95385	0.95888
6.67	0.95573	0.95946
6.68	0.95442	0.97138
6.69	0.94418	0.95875
6.7	0.94937	0.96817
6.71	0.9421	0.94573
6.72	0.94909	0.95373
6.73	0.93076	0.96615
6.74	0.93884	0.95577
6.75	0.9247	0.96815
6.76	0.93039	0.95312
6.77	0.92633	0.96689
6.78	0.95761	0.96031
6.79	0.94471	0.94127
6.8	0.95182	0.94349
6.81	0.92085	0.9582
6.82	0.92639	0.95164
6.83	0.95048	0.95612
6.84	0.94138	0.96923
6.85	0.94986	0.97727
6.86	0.94155	0.95994
6.87	0.92738	0.95774
6.88	0.94806	0.95579
6.89	0.93632	0.97225
6.9	0.93083	0.94484
6.91	0.94529	0.95425
6.92	0.92162	0.97481
6.93	0.93174	0.96265
6.94	0.93389	0.95042
6.95	0.9325	0.97282
6.96	0.94094	0.94263
6.97	0.94402	0.94659
6.98	0.92914	0.96559
6.99	0.9337	0.95317
7	0.93945	0.93754
7.01	0.9173	0.94784
7.02	0.93043	0.95269
7.03	0.9202	0.95974
7.04	0.94044	0.95393
7.05	0.93259	0.95562
7.06	0.9406	0.93753
7.07	0.94589	0.94047
7.08	0.93512	0.9609
7.09	0.93047	0.9377
7.1	0.94337	0.94599
7.11	0.93692	0.96174
7.12	0.93423	0.9395
7.13	0.9344	0.94304
7.14	0.92622	0.96949
7.15	0.92439	0.95158
7.16	0.94759	0.96833
7.17	0.94061	0.96303
7.18	0.93486	0.95819
7.19	0.93427	0.95935
7.2	0.92928	0.96683
7.21	0.92243	0.9565
7.22	0.9279	0.95414
7.23	0.94691	0.95047
7.24	0.92974	0.96112
7.25	0.94867	0.95555
7.26	0.94901	0.95122
7.27	0.92815	0.9561
7.28	0.92093	0.94446
7.29	0.9198	0.95946
7.3	0.9165	0.93983
7.31	0.93027	0.96539
7.32	0.91538	0.95474
7.33	0.94835	0.96855
7.34	0.92221	0.93944
7.35	0.92472	0.9563
7.36	0.93026	0.9536
7.37	0.94507	0.93423
7.38	0.93603	0.94962
7.39	0.92789	0.94262
7.4	0.92751	0.95488
7.41	0.92516	0.95031
7.42	0.95426	0.94471
7.43	0.93848	0.95923
7.44	0.94452	0.95084
7.45	0.93969	0.96052
7.46	0.92572	0.94865
7.47	0.94324	0.95243
7.48	0.94037	0.95042
7.49	0.93343	0.95691
7.5	0.94034	0.95809
7.51	0.94152	0.92914
7.52	0.93767	0.9425
7.53	0.94674	0.94355
7.54	0.94459	0.94891
7.55	0.92267	0.95806
7.56	0.93495	0.946
7.57	0.93138	0.94611
7.58	0.93848	0.93597
7.59	0.9407	0.94808
7.6	0.93446	0.94952
7.61	0.95081	0.93033
7.62	0.98669	0.9421
7.63	0.96155	0.9326
7.64	0.96234	0.9428
7.65	0.96937	0.95301
7.66	0.95167	0.95144
7.67	0.95324	0.94544
7.68	0.94331	0.94366
7.69	0.94355	0.93616
7.7	0.94721	0.9568
7.71	0.93351	0.93576
7.72	0.93089	0.94825
7.73	0.9392	0.93505
7.74	0.94957	0.93676
7.75	0.94301	0.95007
7.76	0.94222	0.94422
7.77	0.93873	0.92128
7.78	0.92437	0.93862
7.79	0.92218	0.94975
7.8	0.93336	0.95433
7.81	0.94943	0.95288
7.82	0.91688	0.95057
7.83	0.93517	0.96499
7.84	0.94272	0.9573
7.85	0.93832	0.95728
7.86	0.9383	0.96953
7.87	0.92422	0.96324
7.88	0.93881	0.94803
7.89	0.92734	0.95761
7.9	0.92269	0.95697
7.91	0.94234	0.9606
7.92	0.92054	0.95953
7.93	0.9318	0.98588
7.94	0.92883	1.03315
7.95	0.92506	1.00036
7.96	0.92181	1.00664
7.97	0.94056	0.98582
7.98	0.93197	0.98539
7.99	0.93013	0.99229
8	0.91596	0.97748
8.01	0.94804	1.00731
8.02	0.93	0.98176
8.03	0.92685	0.98803
8.04	0.93649	0.97574
8.05	0.92816	0.99732
8.06	0.93298	0.98481
8.07	0.9216	0.98192
8.08	0.92561	0.96282
8.09	0.94641	0.95011
8.1	0.93657	0.96156
8.11	0.93549	0.97125
8.12	0.92671	0.95926
8.13	0.92659	0.96883
8.14	0.90935	0.96189
8.15	0.93497	0.97203
8.16	0.9275	0.96327
8.17	0.94215	0.94204
8.18	0.91647	0.95894
8.19	0.93632	0.9753
8.2	0.93186	0.9529
8.21	0.93597	0.97252
8.22	0.9323	0.96394
8.23	0.92297	0.94516
8.24	0.92261	0.94759
8.25	0.92496	0.9537
8.26	0.92004	0.95965
8.27	0.92851	0.95663
8.28	0.92898	0.94591
8.29	1.01761	0.9502
8.3	0.98152	0.97486
8.31	0.99073	0.97262
8.32	0.9338	0.95125
8.33	0.94912	0.97455
8.34	0.9472	0.94138
8.35	0.94824	0.96439
8.36	0.9481	0.94723
8.37	0.95017	0.95276
8.38	0.94212	0.96217
8.39	0.93597	0.94955
8.4	0.93961	0.92312
8.41	0.92505	0.95008
8.42	0.94469	0.95115
8.43	0.9383	0.96014
8.44	0.91829	0.95865
8.45	0.93145	0.94305
8.46	0.91242	0.94503
8.47	0.94301	0.92786
8.48	0.92973	0.9647
8.49	0.93382	0.93526
8.5	0.93454	0.95895
8.51	0.91139	0.96576
8.52	0.93672	0.95427
8.53	0.91909	0.95281
8.54	0.94441	0.94765
8.55	0.92546	0.95084
8.56	0.94833	0.93563
8.57	0.93893	0.94818
8.58	0.94412	0.93861
8.59	0.9084	0.95043
8.6	0.93794	0.95601
8.61	0.93797	0.95203
8.62	0.93196	0.94181
8.63	0.94895	0.95172
8.64	0.92265	0.92955
8.65	0.92653	0.93395
8.66	0.93105	0.96812
8.67	0.9218	0.94968
8.68	0.92484	0.92863
8.69	0.9168	0.94696
8.7	0.9192	0.93609
8.71	0.92462	0.95115
8.72	0.92361	0.95156
8.73	0.91882	0.95057
8.74	0.9325	0.94802
8.75	0.9211	0.96307
8.76	0.92489	0.95628
8.77	0.91613	0.94287
8.78	0.91165	0.95458
8.79	0.92567	0.9393
8.8	0.93178	0.94448
8.81	0.94579	0.94643
8.82	0.93011	0.943
8.83	0.93858	0.9636
8.84	0.94059	0.94921
8.85	0.93234	0.93454
8.86	0.92885	0.94361
8.87	0.94109	0.94956
8.88	0.92688	0.94739
8.89	0.91025	0.92936
8.9	0.93104	0.93401
8.91	0.92094	0.94945
8.92	0.93374	0.95124
8.93	0.92013	0.97886
8.94	0.93041	0.96616
8.95	0.94054	0.96695
8.96	0.92264	0.95374
8.97	0.92897	0.95561
8.98	0.91899	0.96908
8.99	0.93875	0.94304
9	0.9432	0.96378
9.01	0.92512	0.94911
9.02	0.9115	0.97389
9.03	0.92191	0.96597
9.04	0.92022	1.02517
9.05	0.92689	1.04238
9.06	0.92918	1.0373
9.07	0.91972	1.00399
9.08	0.94247	0.98822
9.09	0.92515	0.98604
9.1	0.93863	0.9734
9.11	0.93739	0.96195
9.12	0.91817	0.96507
9.13	0.9258	0.98157
9.14	0.914	0.96582
9.15	0.936	0.96676
9.16	0.92615	0.96665
9.17	0.93208	0.96738
9.18	0.92258	0.95546
9.19	0.9264	0.94755
9.2	0.91355	0.95762
9.21	0.927	0.97247
9.22	0.94625	0.95938
9.23	0.93204	0.95163
9.24	0.94859	0.93938
9.25	0.9083	0.93939
9.26	0.91844	0.93551
9.27	0.92819	0.94029
9.28	0.93975	0.95539
9.29	0.91186	0.94363
9.3	0.91938	0.93632
9.31	0.9352	0.94684
9.32	0.9253	0.94156
9.33	0.9373	0.95897
9.34	0.93615	0.94042
9.35	0.90745	0.93724
9.36	0.95433	0.94495
9.37	0.92565	0.9228
9.38	0.94099	0.93257
9.39	0.92547	0.96024
9.4	0.96012	0.977
9.41	0.93101	0.96478
9.42	0.96816	0.95851
9.43	0.96061	0.95915
9.44	0.93808	0.98393
9.45	0.94432	0.98409
9.46	0.94699	0.97089
9.47	0.94201	0.92635
9.48	0.92994	0.93687
9.49	0.95558	0.95526
9.5	0.92134	0.9461
9.51	0.92577	0.94623
9.52	0.94998	0.95126
9.53	0.92864	0.96295
9.54	0.93894	0.9494
9.55	0.93174	0.94791
9.56	0.94457	0.94383
9.57	0.92755	0.94351
9.58	0.94073	0.94097
9.59	0.93607	0.93919
9.6	0.92919	0.93382
9.61	0.93763	0.9383
9.62	0.9354	0.92867
9.63	0.94589	0.94054
9.64	0.94074	0.94638
9.65	0.96327	0.94291
9.66	0.93101	0.93304
9.67	0.94439	0.92514
9.68	0.96015	0.94879
9.69	0.96977	0.92799
9.7	0.94338	0.93648
9.71	0.94713	0.95198
9.72	0.95587	0.92193
9.73	0.95112	0.92477
9.74	0.95642	0.91605
9.75	0.95021	0.93146
9.76	0.93471	0.92199
9.77	0.94869	0.93648
9.78	0.9526	0.94189
9.79	0.95906	0.92926
9.8	0.95369	0.91928
9.81	0.94798	0.93059
9.82	0.95048	0.92886
9.83	0.97906	0.92457
9.84	0.97012	0.93624
9.85	0.97307	0.94181
9.86	0.99054	0.92911
9.87	0.9812	0.92568
9.88	0.98288	0.9139
9.89	0.97625	0.95292
9.9	0.99155	0.92228
9.91	0.97113	0.94894
9.92	0.98306	0.95617
9.93	0.98377	0.94573
9.94	0.99339	0.93547
9.95	0.97873	0.95543
9.96	0.98642	0.9309
9.97	0.9776	0.92676
9.98	0.96562	0.94373
9.99	0.98883	0.93636
10	0.99672	0.93426

## Sheet: Figure 1E Con(cKO) v cKO Flickr
Flicker events per FOV shown in Fig 1E, each row is the number of flickers in an imaged FOV. Red text denotes data points which were identified as outliers by way of Grubbs test and removed from further analyses.
Control(cKO)				cKO
Flicker Events in FOV	Area (Microns)	Events/micron^2/ms		Flicker Events in FOV	Area (Microns)	Events/micron^2/ms
93	6558.89	1.57547		10	6692.86	0.16601
29	5645.56	0.57075		12	4604.98	0.28954
254	5128.49	5.50303		10	7117.5	0.15611
17	7268.77	0.25986		106	9681.98	1.21646
53	6288.6	0.93644		52	2657.8	2.1739
107	4494.16	2.64541		1	3002.43	0.03701
106	10538.6	1.11758		15	3491.57	0.47734
250	6564.69	4.23139		52	5000.95	1.15534
18	7136.27	0.28026		52	3665.81	1.57613
10	6900.79	0.16101		1	4385.49	0.02534
15	9142	0.18231		6	5650.77	0.11798
1	5779.72	0.01922		24	5498.62	0.48497
145	7018.09	2.29566		6	3175.84	0.20992
16	8850.07	0.20088		5	4627.21	0.12006
2	4446.73	0.04997		13	4641.54	0.3112
88	10916.6	0.89568		0	3952.23	0
0	8818.13	0		0	6332.68	0
35	4135.49	0.94037		0	4986.03	0
8	7590.93	0.1171		0	3223.13	0
186	9254.71	2.2331		1	7512.59	0.01479
9	6839.9	0.1462		1	7184.53	0.01547
46	7142.7	0.71557		22	4972.28	0.49161
0	1465.6	0		15	4771.03	0.34933
112	8477.79	1.46789		24	9518.9	0.28014
11	5108.79	0.23924		33	7178.09	0.51081
106	9179.24	1.28309		29	7880.72	0.40887
367	7547.15	5.40307		6	7303.73	0.09128
7	2337.88	0.33268		45	11725	0.42644
107	3355.3	3.54331		161	9003.74	1.98683
86	10461.6	0.91339		42	5000.7	0.9332
0	4453.02	0		8	9627.53	0.09233
0	2003	0		77	4971.36	1.72097
1	5211.36	0.02132		11	6139.27	0.19908
10	5504.27	0.20186		3	7280.91	0.04578
0	5987.8	0		62	8385.26	0.82155
34	5660.72	0.66737		15	7553.44	0.22065
7	8746.61	0.08892		4	7180.53	0.0619
6	7749.72	0.08602		12	7054.85	0.189
0	5685.97	0		9	7002.83	0.1428
0	6398.35	0		2	4298.76	0.05169
26	5609.77	0.51497		10	7315.19	0.15189
0	7397.19	0		4	2819.41	0.15764
29	7806.42	0.41277		37	9386.05	0.438
0	673.908	0		20	3694.33	0.60152
3	6557.82	0.05083		7	4908.9	0.15844
41	9082.91	0.50155		11	4255.96	0.28718
0	5800.59	0		81	4635.16	1.94168
2	7238.26	0.0307		3	5317.3	0.06269
18	6811.48	0.29362		0	6369.29	0
3	8140.23	0.04095		0	6729.86	0
2	4548.18	0.04886		2	6006.18	0.037
45	7829.53	0.63861		7	6584.48	0.11812
2	6306.69	0.03524		0	7342.78	0
16	3886.17	0.45746		5	9904.05	0.05609
327	5649.7	6.43102		0	8263.47	0
159	3630.95	4.86558		84	5006.36	1.8643
24	6342.67	0.42043		40	3945.01	1.1266
19	6535.54	0.32302		17	2693	0.70141
282	7364.82	4.25446		23	5250.32	0.48674
236	7233.77	3.62497		0	5443.72	0
296	6585.75	4.99395		40	9334.13	0.47615
118	6540.26	2.00468		5	6222.4	0.08928
99	5706.55	1.92761		15	8316.23	0.20041
97	8914.27	1.20905		5	8327.19	0.06672
58	4508.79	1.42931		9	5067.69	0.19733
102	5073.3	2.23392		37	4311.39	0.95355
141	8243.34	1.90052		58	3138.65	2.05326
27	7905.09	0.3795		25	5235.94	0.53052
263	8742.76	3.34245		18	7385.05	0.27082
	--	--		13	10004.3	0.14438
--	--	--		6	4032.33	0.16533
--	--	--		30	8268.94	0.40312
--	--	--
--	--	--
--	--	--
--	--	--
--	--	--
--	--	--
--	--	--
--	--	--
--	--	--
--	--	--
--	--	--
--	--	--
--	--	--
--	--	--
--	--	--
--	--	--
--	--	--
--	--	--
--	--	--
--	--	--
--	--	--
--	--	--
--	--	--
--	--	--
--	--	--
--	--	--
--	--	--
--	--	--
--	--	--
--	--	--
--	--	--
--	--	--
--	--	--
--	--	--
--	--	--
--	--	--
--	--	--
--	--	--
--	--	--
--	--	--
--	--	--
--	--	--
--	--	--
--	--	--
--	--	--
--	--	--
--	--	--
--	--	--
--	--	--
--	--	--
--	--	--
--	--	--
--	--	--
--	--	--
--	--	--
--	--	--
--	--	--
--	--	--
--	--	--
--	--	--
--	--	--
--	--	--
--	--	--
--	--	--
--	--	--
--	--	--
--	--	--
--	--	--
--	--	--
--	--	--
--	--	--
--	--	--
--	--	--
--	--	--
--	--	--
--	--	--
--	--	--
--	--	--
--	--	--
--	--	--
--	--	--
--	--	--
--	--	--
--	--	--
--	--	--
--	--	--
--	--	--
--	--	--
--	--	--
--	--	--
--	--	--
--	--	--
--	--	--
--	--	--
--	--	--
--	--	--
--	--	--
--	--	--
--	--	--
--	--	--
--	--	--
--	--	--
--	--	--
--	--	--
--	--	--
--	--	--
--	--	--
--	--	--
--	--	--
--	--	--
--	--	--
--	--	--
--	--	--
--	--	--
--	--	--
--	--	--
--	--	--
--	--	--
--	--	--
--	--	--
--	--	--
--	--	--
--	--	--
--	--	--
--	--	--
--	--	--
--	--	--
--	--	--
--	--	--
--	--	--
--	--	--
--	--	--
--	--	--
--	--	--
--	--	--
--	--	--
--	--	--
--	--	--
--	--	--
--	--	--
--	--	--
--	--	--
--	--	--
--	--	--
--	--	--
--	--	--
--	--	--
--	--	--
--	--	--
--	--	--
--	--	--
--	--	--
--	--	--
--	--	--
--	--	--
--	--	--
--	--	--
--	--	--
--	--	--
--	--	--
--	--	--
--	--	--
--	--	--
--	--	--
--	--	--
--	--	--
--	--	--
--	--	--
--	--	--
--	--	--
--	--	--
--	--	--
--	--	--
--	--	--
--	--	--
--	--	--
--	--	--
--	--	--
--	--	--
--	--	--
--	--	--
--	--	--
--	--	--
--	--	--
--	--	--
--	--	--
--	--	--
--	--	--
--	--	--
--	--	--
--	--	--
--	--	--
--	--	--
--	--	--
--	--	--
--	--	--
--	--	--
--	--	--
--	--	--
--	--	--
--	--	--
--	--	--
--	--	--
--	--	--
--	--	--
--	--	--
--	--	--
--	--	--
--	--	--
--	--	--
--	--	--
--	--	--
--	--	--
--	--	--
--	--	--
--	--	--
--	--	--
--	--	--
--	--	--
--	--	--
--	--	--
--	--	--
--	--	--
--	--	--
--	--	--
--	--	--
--	--	--
--	--	--
--	--	--
--	--	--
--	--	--
--	--	--
--	--	--
--	--	--
--	--	--
--	--	--
--	--	--
--	--	--
--	--	--
--	--	--
--	--	--
--	--	--
--	--	--
--	--	--
--	--	--
--	--	--
--	--	--
--	--	--
--	--	--
--	--	--
--	--	--
--	--	--
--	--	--
--	--	--
--	--	--
--	--	--
--	--	--
--	--	--
--	--	--
--	--	--
--	--	--
--	--	--
--	--	--
--	--	--
--	--	--
--	--	--
--	--	--
--	--	--
--	--	--
--	--	--
--	--	--
--	--	--
--	--	--
--	--	--
--	--	--
--	--	--
--	--	--
--	--	--
--	--	--
--	--	--
--	--	--
--	--	--
--	--	--
--	--	--
--	--	--
--	--	--
--	--	--
--	--	--
--	--	--
--	--	--
--	--	--
--	--	--
--	--	--
--	--	--
--	--	--
--	--	--
--	--	--
--	--	--
--	--	--
--	--	--
--	--	--
--	--	--
--	--	--
--	--	--
--	--	--
--	--	--
--	--	--
--	--	--
--	--	--
--	--	--
--	--	--
--	--	--
--	--	--
--	--	--
--	--	--
--	--	--
--	--	--
--	--	--
--	--	--
--	--	--
--	--	--
--	--	--
--	--	--
--	--	--
--	--	--
--	--	--
--	--	--
--	--	--
--	--	--
--	--	--
--	--	--
--	--	--
--	--	--
--	--	--
--	--	--
--	--	--
--	--	--
--	--	--
--	--	--
--	--	--
--	--	--
--	--	--
--	--	--
--	--	--
--	--	--
--	--	--
--	--	--
--	--	--
--	--	--
--	--	--
--	--	--
--	--	--
--	--	--
--	--	--
--	--	--
--	--	--
--	--	--
--	--	--
--	--	--
--	--	--
--	--	--
--	--	--
--	--	--
--	--	--
--	--	--
--	--	--
--	--	--
--	--	--
--	--	--
--	--	--
--	--	--
--	--	--
--	--	--
--	--	--
--	--	--
--	--	--
--	--	--
--	--	--
--	--	--
--	--	--
--	--	--
--	--	--
--	--	--
--	--	--
--	--	--
--	--	--
--	--	--
--	--	--
--	--	--
--	--	--
--	--	--
--	--	--
--	--	--
--	--	--
--	--	--
--	--	--
--	--	--
--	--	--
--	--	--
--	--	--
--	--	--
--	--	--
--	--	--
--	--	--
--	--	--
--	--	--
--	--	--
--	--	--
--	--	--
--	--	--
--	--	--
--	--	--
--	--	--
--	--	--
--	--	--
--	--	--
--	--	--
--	--	--
--	--	--
--	--	--
--	--	--
--	--	--
--	--	--
--	--	--
--	--	--
--	--	--
--	--	--
--	--	--
--	--	--
--	--	--
--	--	--
--	--	--
--	--	--
--	--	--
--	--	--
--	--	--
--	--	--
--	--	--
--	--	--
--	--	--
--	--	--
--	--	--
--	--	--
--	--	--
--	--	--
--	--	--
--	--	--
--	--	--
--	--	--
--	--	--
--	--	--
--	--	--
--	--	--
--	--	--
--	--	--
--	--	--
--	--	--
--	--	--
--	--	--
--	--	--
--	--	--
--	--	--
--	--	--
--	--	--
--	--	--
--	--	--
--	--	--
--	--	--
--	--	--
--	--	--
--	--	--
--	--	--
--	--	--
--	--	--
--	--	--
--	--	--
--	--	--
--	--	--
--	--	--
--	--	--
--	--	--
--	--	--
--	--	--
--	--	--
--	--	--
--	--	--
--	--	--
--	--	--
--	--	--
--	--	--
--	--	--
--	--	--
--	--	--
--	--	--
--	--	--
--	--	--
--	--	--
--	--	--
--	--	--
--	--	--
--	--	--
--	--	--
--	--	--
--	--	--
--	--	--
--	--	--
--	--	--
--	--	--
--	--	--
--	--	--
--	--	--
--	--	--
--	--	--
--	--	--
--	--	--
--	--	--
--	--	--
--	--	--
--	--	--
--	--	--
--	--	--
--	--	--
--	--	--
--	--	--
--	--	--
--	--	--
--	--	--
--	--	--
--	--	--
--	--	--
--	--	--
--	--	--
--	--	--
--	--	--
--	--	--
--	--	--
--	--	--
--	--	--
--	--	--
--	--	--
--	--	--
--	--	--
--	--	--
--	--	--
--	--	--
--	--	--
--	--	--
--	--	--
--	--	--
--	--	--
--	--	--
--	--	--
--	--	--
--	--	--
--	--	--
--	--	--
--	--	--
--	--	--
--	--	--
--	--	--
--	--	--
--	--	--
--	--	--
--	--	--
--	--	--
--	--	--
--	--	--
--	--	--
--	--	--
--	--	--
--	--	--
--	--	--
--	--	--
--	--	--
--	--	--
--	--	--
--	--	--
--	--	--
--	--	--
--	--	--
--	--	--
--	--	--
--	--	--
--	--	--
--	--	--
--	--	--
--	--	--
--	--	--
--	--	--
--	--	--
--	--	--
--	--	--
--	--	--
--	--	--
--	--	--
--	--	--
--	--	--
--	--	--
--	--	--
--	--	--
--	--	--
--	--	--
--	--	--
--	--	--
--	--	--
--	--	--
--	--	--
--	--	--
--	--	--
--	--	--
--	--	--
--	--	--
--	--	--
--	--	--
--	--	--
--	--	--
--	--	--
--	--	--
--	--	--
--	--	--
--	--	--
--	--	--
--	--	--
--	--	--
--	--	--
--	--	--
--	--	--
--	--	--
--	--	--
--	--	--
--	--	--
--	--	--
--	--	--
--	--	--
--	--	--
--	--	--
--	--	--
--	--	--
--	--	--
--	--	--
--	--	--
--	--	--
--	--	--
--	--	--
--	--	--
--	--	--
--	--	--
--	--	--
--	--	--
--	--	--
--	--	--
--	--	--
--	--	--
--	--	--
--	--	--
--	--	--
--	--	--
--	--	--
--	--	--
--	--	--
--	--	--
--	--	--
--	--	--
--	--	--
--	--	--
--	--	--
--	--	--
--	--	--
--	--	--
--	--	--
--	--	--
--	--	--
--	--	--
--	--	--
--	--	--
--	--	--
--	--	--
--	--	--
--	--	--
--	--	--
--	--	--
--	--	--
--	--	--
--	--	--
--	--	--
--	--	--
--	--	--
--	--	--
--	--	--
--	--	--
--	--	--
--	--	--
--	--	--
--	--	--
--	--	--
--	--	--
--	--	--
--	--	--
--	--	--
--	--	--
--	--	--
--	--	--
--	--	--
--	--	--
--	--	--
--	--	--
--	--	--
--	--	--
--	--	--
--	--	--
--	--	--
--	--	--
--	--	--
--	--	--
--	--	--
--	--	--
--	--	--
--	--	--
--	--	--
--	--	--
--	--	--
--	--	--
--	--	--
--	--	--
--	--	--
--	--	--
--	--	--
--	--	--
--	--	--
--	--	--
--	--	--
--	--	--
--	--	--
--	--	--
--	--	--
--	--	--
--	--	--
--	--	--
--	--	--
--	--	--
--	--	--
--	--	--
--	--	--
--	--	--
--	--	--
--	--	--
--	--	--
--	--	--
--	--	--
--	--	--
--	--	--
--	--	--
--	--	--
--	--	--
--	--	--
--	--	--
--	--	--
--	--	--
--	--	--
--	--	--
--	--	--
--	--	--
--	--	--
--	--	--
--	--	--
--	--	--
--	--	--
--	--	--
--	--	--
--	--	--
--	--	--
--	--	--
--	--	--
--	--	--
--	--	--
--	--	--
--	--	--
--	--	--
--	--	--
--	--	--
--	--	--
--	--	--
--	--	--
--	--	--
--	--	--
--	--	--
--	--	--
--	--	--
--	--	--
--	--	--
--	--	--
--	--	--
--	--	--
--	--	--
--	--	--
--	--	--
--	--	--
--	--	--
--	--	--
--	--	--
--	--	--
--	--	--
--	--	--
--	--	--
--	--	--
--	--	--
--	--	--
--	--	--
--	--	--
--	--	--
--	--	--
--	--	--
--	--	--
--	--	--
--	--	--
--	--	--
--	--	--
--	--	--
--	--	--
--	--	--
--	--	--
--	--	--
--	--	--
--	--	--
--	--	--
--	--	--
--	--	--
--	--	--
--	--	--
--	--	--
--	--	--
--	--	--
--	--	--
--	--	--
--	--	--
--	--	--
--	--	--
--	--	--
--	--	--
--	--	--
--	--	--
--	--	--
--	--	--
--	--	--
--	--	--
--	--	--
--	--	--
--	--	--
--	--	--
--	--	--
--	--	--
--	--	--
--	--	--
--	--	--
--	--	--
--	--	--
--	--	--
--	--	--
--	--	--
--	--	--
--	--	--
--	--	--
--	--	--
--	--	--
--	--	--
--	--	--
--	--	--
--	--	--
--	--	--
--	--	--
--	--	--
--	--	--
--	--	--
--	--	--
--	--	--
--	--	--
	--	--
	--	--
	--	--
		--
		--
		--
		--
		--
		--
		--
		--
		--
		--
		--
		--
		--
		--

## Sheet: Figure 1F Con(GoF)vGoF Trace
Representative Calcium flicker trace plotted in Fig 1F
Time(s)	Con(GoF)	GoF
0.01	0.99267	1.00442
0.02	0.99261	0.98559
0.03	0.99232	1.00064
0.04	0.97878	0.93079
0.05	0.98648	1.01089
0.06	1.02024	1.01503
0.07	1.00197	1.0123
0.08	0.99878	0.97121
0.09	0.9926	0.99296
0.1	1.00568	1.02281
0.11	1.00939	0.99044
0.12	0.99254	1.00016
0.13	0.97568	0.99024
0.14	0.99307	1.02828
0.15	0.97712	0.98155
0.16	1.01511	0.94899
0.17	0.98123	1.00928
0.18	0.99596	0.99201
0.19	1.01849	0.98302
0.2	1.00082	0.98269
0.21	1.0048	1.00871
0.22	1.0106	0.97913
0.23	0.99734	1.03227
0.24	1.0188	1.01497
0.25	0.99861	1.0355
0.26	1.01837	1.01988
0.27	1.00589	0.99177
0.28	1.014	0.98056
0.29	1.00068	1.01298
0.3	1.0132	0.94699
0.31	0.99102	1.00519
0.32	1.00414	1.0243
0.33	0.98471	1.00429
0.34	1.00125	1.03206
0.35	1.00594	1.01749
0.36	1.00109	1.00379
0.37	1.00282	1.00904
0.38	1.01517	1.01359
0.39	1.01025	1.01629
0.4	0.98263	0.98316
0.41	1.00124	0.97942
0.42	0.9833	0.99239
0.43	1.00268	0.98423
0.44	0.99735	1.0418
0.45	1.00928	0.9955
0.46	1.02138	0.98593
0.47	0.98234	0.98883
0.48	1.00135	1.0329
0.49	1.00286	1.03947
0.5	0.98018	1.00991
0.51	1.00787	0.96877
0.52	0.99404	0.9311
0.53	1.00108	0.96683
0.54	1.02521	1.01722
0.55	0.99529	0.99795
0.56	0.97978	1.01133
0.57	0.9946	0.97408
0.58	1.01428	1.01794
0.59	1.00283	1.00288
0.6	0.96426	1.03158
0.61	0.99714	0.97912
0.62	0.99571	0.99508
0.63	0.97123	1.00563
0.64	0.98227	1.01658
0.65	0.98983	1.00958
0.66	0.98746	1.00904
0.67	0.98722	0.98997
0.68	0.9893	1.03215
0.69	0.99199	0.97124
0.7	0.98746	0.99226
0.71	0.98265	0.97172
0.72	0.98216	0.95875
0.73	0.99242	0.98735
0.74	0.99112	0.99981
0.75	0.98134	0.99622
0.76	0.98914	1.00735
0.77	0.99709	1.02642
0.78	0.96974	1.00553
0.79	0.99285	0.98953
0.8	0.97408	0.99912
0.81	0.99015	1.01129
0.82	0.9927	0.97854
0.83	0.99479	1.01415
0.84	0.98303	0.99878
0.85	0.98475	1.0184
0.86	0.98373	0.98027
0.87	0.97367	0.95537
0.88	0.99639	1.00567
0.89	0.99987	0.98649
0.9	0.96751	1.00931
0.91	0.97194	0.98604
0.92	0.99683	1.01754
0.93	0.97717	0.99759
0.94	0.97211	1.02616
0.95	0.98462	1.02173
0.96	0.97452	0.95679
0.97	1.00874	0.96984
0.98	0.98921	0.9579
0.99	0.99859	1.01087
1	1.00776	1.01291
1.01	0.99068	1.01416
1.02	0.98697	1.01173
1.03	1.0083	0.97645
1.04	0.99738	0.99222
1.05	1.00488	0.99513
1.06	0.98283	1.00152
1.07	0.99805	0.97839
1.08	0.98799	0.98871
1.09	0.99693	0.99889
1.1	0.99241	1.04628
1.11	0.98844	0.98772
1.12	0.96993	1.02739
1.13	0.96666	0.95566
1.14	0.96954	0.98591
1.15	0.97949	1.03069
1.16	0.97509	1.09733
1.17	0.97201	1.02498
1.18	0.98386	1.00981
1.19	1.00831	1.05918
1.2	0.96492	1.00394
1.21	0.97545	1.05675
1.22	0.9685	1.05473
1.23	0.97252	1.02597
1.24	0.97281	0.99006
1.25	0.9908	1.01363
1.26	0.98548	1.05641
1.27	0.97267	1.00333
1.28	0.97774	0.99086
1.29	0.97151	1.08909
1.3	0.96243	1.11398
1.31	0.99052	1.0956
1.32	0.97138	1.06046
1.33	0.97175	1.05805
1.34	0.99046	1.00753
1.35	0.9771	1.08614
1.36	0.98805	1.04421
1.37	0.98086	1.18647
1.38	0.9762	1.16968
1.39	0.97576	1.14961
1.4	0.96136	1.17877
1.41	0.96902	1.22566
1.42	0.97766	1.11663
1.43	0.95155	1.0553
1.44	0.95405	1.04102
1.45	0.9569	1.00719
1.46	0.99402	1.06066
1.47	0.96729	1.01866
1.48	0.96877	1.01118
1.49	0.97134	1.07398
1.5	0.97843	1.02358
1.51	0.96165	1.05978
1.52	0.97903	1.01423
1.53	0.97812	1.01191
1.54	0.96933	1.05714
1.55	0.96881	0.97589
1.56	0.98383	1.02256
1.57	1.00192	1.01442
1.58	0.95311	1.0043
1.59	0.98062	1.084
1.6	1.00029	1.09154
1.61	0.99967	1.12518
1.62	0.96902	1.06323
1.63	0.99517	1.0525
1.64	0.98141	1.0276
1.65	1.00733	1.00048
1.66	0.97047	1.03061
1.67	0.99469	1.02314
1.68	1.00134	1.09182
1.69	0.98433	1.09304
1.7	0.97162	1.18732
1.71	0.98732	1.15443
1.72	0.9994	1.22569
1.73	0.98749	1.18775
1.74	0.99698	1.25267
1.75	0.99765	1.17339
1.76	1.0042	1.04542
1.77	0.98143	1.03166
1.78	0.99966	1.05061
1.79	1.0115	1.17782
1.8	0.99646	1.1116
1.81	0.98842	1.07038
1.82	0.97679	1.07555
1.83	0.98995	1.05669
1.84	0.99485	1.12777
1.85	0.9891	1.06698
1.86	1.0591	1.04044
1.87	1.09675	0.98923
1.88	1.06907	0.98086
1.89	1.06456	1.02983
1.9	1.00011	1.07159
1.91	1.03827	1.00835
1.92	1.0175	0.98769
1.93	1.00904	1.07487
1.94	1.00865	1.00861
1.95	1.00218	1.01564
1.96	1.00735	0.99467
1.97	1.00268	0.96216
1.98	1.02165	0.97302
1.99	1.00035	1.05762
2	0.98839	1.02968
2.01	1.00156	0.9795
2.02	1.01445	1.00839
2.03	1.01275	1.00708
2.04	0.99706	1.0196
2.05	0.99741	1.00547
2.06	1.02481	0.97013
2.07	0.99591	0.95717
2.08	1.00018	1.0004
2.09	1.00197	1.00932
2.1	0.99688	1.02733
2.11	1.05881	1.01422
2.12	1.10732	1.06717
2.13	1.12413	1.01997
2.14	1.10135	0.98284
2.15	1.0603	1.04236
2.16	1.05035	1.05887
2.17	1.04849	1.1256
2.18	1.04863	1.11688
2.19	1.0086	1.21022
2.2	0.9999	1.17366
2.21	1.025	1.25432
2.22	1.02168	1.16969
2.23	0.98343	1.093
2.24	1.00568	1.05693
2.25	0.98146	1.03284
2.26	1.01934	1.05727
2.27	0.98944	1.01211
2.28	1.01244	0.94543
2.29	1.01582	0.95661
2.3	1.02087	1.02477
2.31	1.00776	1.14809
2.32	0.9888	0.97886
2.33	0.99281	0.95098
2.34	0.97877	1.08306
2.35	0.97706	1.25922
2.36	0.99369	1.22772
2.37	1.00345	1.07101
2.38	0.98502	1.04264
2.39	0.99484	0.99986
2.4	0.98742	1.01011
2.41	0.981	0.99043
2.42	0.99117	1.0047
2.43	1.00832	1.00643
2.44	0.99677	1.01088
2.45	0.994	0.99022
2.46	0.9727	1.03905
2.47	0.96809	1.07606
2.48	0.99575	1.23276
2.49	0.99106	1.1235
2.5	0.98927	1.07241
2.51	0.98083	1.0907
2.52	0.97225	1.18659
2.53	0.99069	1.06011
2.54	0.99463	1.05188
2.55	0.99631	0.99825
2.56	0.98217	0.99735
2.57	0.98412	1.00082
2.58	0.97919	0.959
2.59	0.98635	0.98878
2.6	0.96534	0.96005
2.61	0.97218	0.99908
2.62	0.97483	1.00152
2.63	0.96343	1.02314
2.64	0.98138	0.97618
2.65	0.96442	0.97416
2.66	0.97758	0.95371
2.67	0.98061	1.00636
2.68	1.00949	1.037
2.69	0.98797	0.94968
2.7	0.98286	0.96872
2.71	0.97745	1.01932
2.72	0.98866	0.99409
2.73	0.97329	0.99376
2.74	0.96059	0.95772
2.75	0.96384	1.02059
2.76	0.97849	1.01438
2.77	0.96692	1.02806
2.78	0.98339	1.00386
2.79	0.9765	0.96078
2.8	0.98022	0.97826
2.81	0.96065	0.95904
2.82	0.97338	1.0372
2.83	0.96577	0.99318
2.84	0.9756	0.94125
2.85	0.94754	1.00825
2.86	0.95152	0.99189
2.87	0.97382	1.01553
2.88	0.9763	0.99147
2.89	0.96546	1.01559
2.9	0.95043	0.97769
2.91	0.95706	1.00298
2.92	0.96986	0.94559
2.93	0.97514	1.00398
2.94	0.98195	0.99857
2.95	0.97856	0.95581
2.96	0.98643	0.97911
2.97	0.97535	1.00756
2.98	0.97874	0.97434
2.99	0.97948	0.98078
3	0.96717	0.95215
3.01	0.95635	0.92042
3.02	0.97118	0.93755
3.03	0.97236	0.97012
3.04	0.96975	0.97517
3.05	0.9629	1.00946
3.06	0.95928	0.94991
3.07	0.95291	0.97807
3.08	0.96837	0.9709
3.09	0.9612	0.92664
3.1	0.95528	0.97542
3.11	0.94665	1.01192
3.12	0.96243	0.98796
3.13	0.96808	0.9865
3.14	0.95946	1.01891
3.15	0.97164	0.99937
3.16	0.95281	0.98495
3.17	0.99698	0.96703
3.18	0.97076	0.96222
3.19	0.9752	1.00436
3.2	0.96103	0.98908
3.21	0.95052	0.93951
3.22	0.94194	0.97024
3.23	0.96145	1.02554
3.24	0.95056	1.01098
3.25	0.9676	1.00397
3.26	0.94385	0.9553
3.27	0.95025	0.9786
3.28	0.95728	0.97844
3.29	0.95818	1.01392
3.3	0.97306	1.02146
3.31	0.96028	0.98379
3.32	0.96847	0.98289
3.33	0.95772	0.97049
3.34	0.9432	0.99084
3.35	0.96484	1.00342
3.36	0.95128	0.98815
3.37	0.9675	0.96585
3.38	0.96246	0.96698
3.39	0.94048	0.99092
3.4	0.9498	1.03074
3.41	0.93795	0.97081
3.42	0.94016	0.9699
3.43	0.94888	0.97397
3.44	0.95385	0.99218
3.45	0.97048	0.96582
3.46	0.96786	0.95026
3.47	0.97036	0.97958
3.48	0.95453	0.94013
3.49	0.95471	0.98656
3.5	0.9602	0.97657
3.51	0.93769	0.93266
3.52	0.95924	0.98167
3.53	0.95351	0.97722
3.54	0.95442	0.92429
3.55	0.95207	1.01275
3.56	0.95882	0.9918
3.57	0.94811	0.99646
3.58	0.96456	0.96621
3.59	0.9621	0.96489
3.6	0.96214	0.98356
3.61	0.97249	1.0328
3.62	0.97471	0.9488
3.63	0.95903	0.96263
3.64	0.95333	0.96013
3.65	0.95657	1.02733
3.66	0.9564	0.97335
3.67	0.97154	1.00579
3.68	0.93479	0.99121
3.69	0.97096	0.99337
3.7	0.95478	0.98793
3.71	0.95914	1.00367
3.72	0.93036	0.97556
3.73	0.95693	0.99227
3.74	0.94099	0.98419
3.75	0.96501	0.95532
3.76	0.9326	0.9969
3.77	0.95246	0.9606
3.78	0.94385	1.01424
3.79	0.93731	0.99518
3.8	1.00074	0.96991
3.81	0.99578	1.01936
3.82	0.99037	1.01254
3.83	0.98628	0.98448
3.84	0.95803	0.9743
3.85	0.96136	0.96045
3.86	0.96399	0.99228
3.87	0.96442	0.96564
3.88	0.96004	0.96449
3.89	0.96823	1.02105
3.9	0.95487	0.8948
3.91	0.95253	0.99543
3.92	0.96232	0.97713
3.93	0.94702	0.9247
3.94	0.94127	0.96844
3.95	0.93946	1.06367
3.96	0.93317	0.97075
3.97	0.98258	0.98273
3.98	0.96632	1.00285
3.99	0.96887	0.99391
4	0.95381	0.98667
4.01	0.94727	0.97339
4.02	0.94158	0.94306
4.03	0.92769	1.02066
4.04	0.9474	0.91846
4.05	0.9502	1.00134
4.06	0.94263	0.96884
4.07	0.95534	0.93867
4.08	0.96013	0.962
4.09	0.95731	0.98937
4.1	0.95933	1.02274
4.11	0.94236	0.98612
4.12	0.95066	0.93
4.13	0.94834	0.98775
4.14	0.97266	0.97763
4.15	0.97783	0.98231
4.16	0.99419	0.97781
4.17	0.96782	0.98029
4.18	0.95457	0.97282
4.19	0.96538	1.02868
4.2	0.97462	0.99483
4.21	0.96677	0.95922
4.22	0.98569	1.00566
4.23	0.97203	1.02087
4.24	0.97909	0.94924
4.25	1.00137	0.96592
4.26	1.07014	0.99931
4.27	1.07998	0.9811
4.28	1.05478	0.9613
4.29	1.02602	0.97834
4.3	1.02139	0.99001
4.31	1.00855	1.00685
4.32	0.99839	0.97363
4.33	0.9953	0.97932
4.34	1.00458	0.96987
4.35	1.00631	1.01529
4.36	1.00445	0.97199
4.37	0.97742	0.96187
4.38	0.97476	0.95
4.39	0.97402	0.95052
4.4	0.98739	0.98257
4.41	0.97138	1.00556
4.42	0.98271	0.96201
4.43	1.00511	0.97518
4.44	0.96466	0.98859
4.45	0.95737	0.97155
4.46	0.95617	1.01842
4.47	0.96996	0.94779
4.48	1.01477	0.99199
4.49	1.06484	1.00835
4.5	1.06194	0.99178
4.51	1.05994	1.00176
4.52	1.05964	1.02446
4.53	1.07193	1.01109
4.54	1.03158	0.95859
4.55	0.99908	0.97249
4.56	1.00702	1.02918
4.57	0.99741	0.95495
4.58	0.98897	1.00349
4.59	0.96818	0.98596
4.6	0.97704	0.97665
4.61	0.97998	0.9962
4.62	0.97044	0.96602
4.63	0.97468	0.9725
4.64	0.96472	0.97844
4.65	0.99357	0.97777
4.66	0.96872	0.93455
4.67	0.97332	1.00572
4.68	0.95367	0.99775
4.69	0.99353	0.98409
4.7	0.97197	1.02878
4.71	0.95191	0.98479
4.72	0.977	0.98748
4.73	0.97604	0.97385
4.74	0.9597	0.99651
4.75	0.95111	0.9893
4.76	0.96256	1.03519
4.77	0.96449	1.01749
4.78	0.95548	0.99476
4.79	0.95742	0.98749
4.8	0.93846	0.96924
4.81	0.95752	1.05408
4.82	0.9406	1.08799
4.83	0.96685	1.10097
4.84	0.96787	1.02109
4.85	0.94948	1.00862
4.86	0.91806	0.96725
4.87	0.95947	1.00422
4.88	0.94308	0.99681
4.89	0.94474	1.0317
4.9	0.95722	1.00753
4.91	0.95544	1.02093
4.92	0.93628	1.01644
4.93	0.95326	1.07876
4.94	0.98028	0.97431
4.95	0.96079	0.95921
4.96	0.97752	1.0306
4.97	0.94711	1.01766
4.98	0.93835	0.99273
4.99	0.97195	0.96449
5	0.95517	0.98197
5.01	0.96763	0.99055
5.02	1.00775	1.00621
5.03	1.01913	1.00164
5.04	1.00608	0.97369
5.05	0.96394	0.97755
5.06	0.97185	1.07863
5.07	0.99525	1.08199
5.08	0.97201	1.03433
5.09	0.96682	1.09118
5.1	0.96433	1.01655
5.11	0.95088	1.0123
5.12	0.93304	1.00756
5.13	0.95019	1.12634
5.14	0.95551	1.0545
5.15	0.95086	1.02024
5.16	0.948	1.03079
5.17	0.92551	1.02345
5.18	0.9462	1.02413
5.19	0.92698	0.96836
5.2	0.9438	0.99306
5.21	0.94101	0.96625
5.22	0.95881	0.96748
5.23	0.95088	0.98689
5.24	0.93996	0.96991
5.25	0.93163	0.94305
5.26	0.97396	0.96286
5.27	0.95493	0.99528
5.28	0.93862	0.95199
5.29	0.97181	0.93691
5.3	0.98241	0.96272
5.31	0.97109	0.97545
5.32	0.95926	0.96791
5.33	0.94759	0.99428
5.34	0.96546	0.95637
5.35	0.93712	0.96117
5.36	0.94666	0.99756
5.37	0.94518	1.0124
5.38	0.95193	0.95397
5.39	0.9237	0.97107
5.4	0.93018	0.9708
5.41	0.93802	0.97711
5.42	0.95036	1.00807
5.43	0.9178	0.96778
5.44	0.96244	0.94968
5.45	0.95838	0.98416
5.46	0.94507	0.94279
5.47	0.93144	0.95266
5.48	0.94017	0.9873
5.49	0.93824	0.98771
5.5	0.942	0.97949
5.51	0.94429	0.94169
5.52	0.95393	0.97966
5.53	0.94519	0.9938
5.54	0.94719	0.96105
5.55	0.94127	0.97002
5.56	0.96613	1.02187
5.57	0.96618	0.9894
5.58	0.93407	0.97985
5.59	0.9498	0.98327
5.6	0.97418	0.96606
5.61	0.96532	0.97133
5.62	0.96852	0.95962
5.63	0.94785	0.98312
5.64	0.99701	0.94642
5.65	0.97204	1.01678
5.66	0.97394	0.99285
5.67	0.947	1.01331
5.68	0.97275	0.98652
5.69	0.98083	0.95723
5.7	0.9525	0.95938
5.71	0.97826	0.9931
5.72	0.96204	0.98555
5.73	0.96032	0.93923
5.74	0.93799	0.98917
5.75	0.95536	0.93824
5.76	0.95088	0.98342
5.77	0.95317	0.96953
5.78	0.93927	1.00524
5.79	0.94358	0.98428
5.8	0.94976	0.96159
5.81	0.95486	1.01061
5.82	0.93439	1.00536
5.83	0.92169	0.94697
5.84	0.94682	0.99574
5.85	0.93937	0.95236
5.86	0.95559	0.96547
5.87	0.92356	0.99513
5.88	0.92274	0.95542
5.89	0.90966	0.9729
5.9	0.93156	0.95597
5.91	0.93176	1.00331
5.92	0.95693	1.01597
5.93	0.9306	1.05303
5.94	0.98075	1.00368
5.95	0.97321	1.0537
5.96	0.97267	1.12781
5.97	0.95901	1.13904
5.98	0.9555	1.08189
5.99	0.97585	1.0892
6	0.93837	1.01588
6.01	0.92756	1.14362
6.02	0.94212	1.13259
6.03	0.95274	0.99876
6.04	0.95307	1.0001
6.05	0.94189	1.00387
6.06	0.94128	0.97443
6.07	0.9402	0.9964
6.08	0.94735	1.00265
6.09	0.96129	0.94321
6.1	0.97628	0.98213
6.11	0.95605	1.06731
6.12	0.93644	1.00168
6.13	0.93452	0.99138
6.14	0.95227	0.995
6.15	0.94584	0.97605
6.16	0.93982	1.00495
6.17	0.94459	0.9699
6.18	0.94602	1.00094
6.19	0.92743	1.01543
6.2	0.93664	1.09687
6.21	0.93907	1.14764
6.22	0.95285	1.13754
6.23	0.92491	1.04807
6.24	0.92147	1.06152
6.25	0.95252	1.12854
6.26	0.93632	1.13708
6.27	0.94887	1.17129
6.28	0.93928	1.14975
6.29	0.95995	1.08234
6.3	0.9602	0.9694
6.31	0.95591	0.97464
6.32	0.95973	0.9557
6.33	0.97077	1.0113
6.34	0.97217	1.03406
6.35	0.94736	0.93338
6.36	0.96161	0.97369
6.37	0.97531	1.02064
6.38	0.95817	1.10914
6.39	0.95455	1.14606
6.4	0.971	1.18718
6.41	0.96482	1.05488
6.42	0.9735	1.03903
6.43	0.93849	1.15779
6.44	0.94793	1.03855
6.45	0.97135	0.98783
6.46	0.94321	0.98775
6.47	0.97477	1.09976
6.48	0.96591	1.11483
6.49	0.95824	1.01846
6.5	0.93397	0.96953
6.51	0.95023	0.97922
6.52	0.95899	1.01147
6.53	0.97079	1.03583
6.54	0.94561	1.05706
6.55	0.94967	0.95004
6.56	0.95492	1.07822
6.57	0.95042	1.12255
6.58	0.96388	1.00161
6.59	0.94505	1.02324
6.6	0.94245	0.9758
6.61	0.94459	0.99592
6.62	0.9488	0.94453
6.63	0.97066	1.06675
6.64	0.95186	1.04648
6.65	0.93278	1.03329
6.66	0.99194	0.98853
6.67	1.00223	1.05319
6.68	0.99267	1.06711
6.69	0.97106	0.98682
6.7	0.95708	0.93593
6.71	0.97477	0.97274
6.72	0.96332	0.95353
6.73	0.94654	0.99935
6.74	0.98798	0.98086
6.75	0.96669	0.99862
6.76	0.97028	0.96801
6.77	0.94741	0.99971
6.78	0.96936	0.96662
6.79	1.0199	0.9991
6.8	1.00922	0.99416
6.81	0.97586	1.00338
6.82	0.99036	0.97512
6.83	0.99712	1.04664
6.84	0.97243	1.03266
6.85	0.98985	1.06914
6.86	0.93744	1.03843
6.87	0.9874	0.96379
6.88	0.94818	1.01348
6.89	0.95053	1.01111
6.9	0.99431	1.01532
6.91	0.96574	1.01009
6.92	0.95936	1.06639
6.93	0.92882	1.07419
6.94	0.98224	1.14378
6.95	0.94332	1.09189
6.96	0.95895	0.99115
6.97	0.96039	0.97787
6.98	0.95269	1.00391
6.99	0.94868	0.97565
7	0.95326	0.98474
7.01	0.95348	0.96487
7.02	0.93587	0.95719
7.03	0.98248	0.94134
7.04	1.01283	0.93709
7.05	1.03787	0.99852
7.06	1.03454	0.95715
7.07	1.08066	0.97987
7.08	1.05178	0.98693
7.09	1.07984	0.98533
7.1	1.06367	1.00619
7.11	1.04574	0.99902
7.12	1.06371	0.97053
7.13	1.02353	0.99588
7.14	1.01264	0.98679
7.15	1.00456	1.06798
7.16	0.98947	1.0454
7.17	0.9993	0.97941
7.18	1.0045	1.03903
7.19	0.99453	0.98099
7.2	1.00417	1.02503
7.21	0.98456	0.95166
7.22	0.98108	1.00489
7.23	0.99813	0.97692
7.24	0.98731	0.9527
7.25	0.98097	1.0207
7.26	0.9707	1.09244
7.27	0.99787	1.00773
7.28	0.99851	0.94496
7.29	0.97407	0.96571
7.3	0.98261	1.02263
7.31	0.99724	1.014
7.32	0.97848	0.98806
7.33	0.97177	1.0094
7.34	0.98557	0.92197
7.35	0.9808	0.99062
7.36	1.00369	0.97239
7.37	0.9719	1.01009
7.38	0.99408	1.05322
7.39	0.99887	1.03791
7.4	1.00229	0.97047
7.41	0.972	1.00899
7.42	0.97845	0.98132
7.43	0.98449	0.96826
7.44	0.97267	0.97879
7.45	0.97641	1.01847
7.46	0.98407	0.95444
7.47	0.98337	0.98703
7.48	0.9776	1.02493
7.49	0.96932	0.965
7.5	0.96494	0.99579
7.51	0.99226	0.97787
7.52	0.98152	0.96966
7.53	0.9664	1.00299
7.54	0.97359	0.99677
7.55	0.98213	1.00458
7.56	0.95325	0.93992
7.57	0.95218	1.01184
7.58	0.97915	1.01536
7.59	0.96636	1.01251
7.6	0.96538	0.96253
7.61	0.95781	1.00523
7.62	0.97078	0.96764
7.63	0.96964	0.99397
7.64	0.96792	0.9512
7.65	0.95945	0.97833
7.66	0.952	0.97534
7.67	0.94341	0.97776
7.68	0.9622	0.97848
7.69	0.94571	1.00233
7.7	0.96107	1.00827
7.71	0.97473	0.99801
7.72	0.96336	0.98482
7.73	0.97534	0.98581
7.74	0.991	0.99957
7.75	0.94592	0.94006
7.76	0.95603	0.96718
7.77	0.98775	0.99771
7.78	0.97693	1.00147
7.79	0.9703	0.97685
7.8	0.96444	1.04901
7.81	0.97598	1.01192
7.82	0.95664	0.9911
7.83	0.95848	1.00291
7.84	0.96666	1.0355
7.85	0.99346	0.96697
7.86	0.97516	1.0593
7.87	0.94372	1.10016
7.88	0.96052	1.2015
7.89	0.96333	1.06857
7.9	0.95795	0.996
7.91	0.96311	1.02216
7.92	0.95853	1.03011
7.93	0.96259	1.01194
7.94	0.95843	1.01113
7.95	0.94767	0.96523
7.96	0.95689	0.95227
7.97	0.9771	0.97412
7.98	0.95219	1.02106
7.99	0.94898	0.99198
8	0.9698	0.98476
8.01	0.94363	0.97421
8.02	0.94298	0.98565
8.03	0.96353	0.94041
8.04	0.96132	0.96978
8.05	0.96327	0.93663
8.06	0.94702	0.95324
8.07	0.95553	0.99515
8.08	0.98048	1.01547
8.09	0.95346	1.03691
8.1	0.952	1.08468
8.11	0.95298	1.21443
8.12	0.97568	1.1408
8.13	0.96015	1.14054
8.14	0.97782	1.08962
8.15	0.98415	1.05539
8.16	0.96409	0.97186
8.17	0.95616	1.05282
8.18	0.96439	1.06504
8.19	0.93061	1.06304
8.2	0.99104	0.99769
8.21	0.94006	1.02159
8.22	0.92826	0.99888
8.23	0.95401	1.03417
8.24	0.93953	0.97635
8.25	0.96321	1.00228
8.26	0.96524	0.9748
8.27	0.98166	0.96441
8.28	0.96134	1.03806
8.29	0.95113	1.00534
8.3	0.95625	0.97274
8.31	0.9706	0.96063
8.32	0.95896	0.94722
8.33	0.97421	0.97431
8.34	0.97336	0.96566
8.35	0.99263	0.93502
8.36	1.00007	0.97252
8.37	1.00706	1.01859
8.38	1.00553	1.12761
8.39	1.01071	1.26634
8.4	1.00271	1.29269
8.41	1.00095	1.05034
8.42	1.01009	1.01494
8.43	0.985	1.16535
8.44	0.99659	1.05078
8.45	0.98001	1.00587
8.46	0.95474	0.97643
8.47	1.00221	1.04205
8.48	0.98225	1.14107
8.49	0.98359	1.23075
8.5	0.9713	1.25655
8.51	0.97593	1.09046
8.52	0.97795	1.07704
8.53	0.99199	0.98452
8.54	0.98187	1.04923
8.55	0.96848	1.00915
8.56	0.96739	0.99408
8.57	0.97837	0.99299
8.58	0.96556	1.00073
8.59	0.991	1.01312
8.6	1.00097	1.02032
8.61	1.03182	1.01411
8.62	1.01813	0.99225
8.63	0.97354	0.98687
8.64	0.96459	0.99694
8.65	1.00544	1.06451
8.66	0.97484	1.05112
8.67	0.96648	1.01741
8.68	0.96554	0.98879
8.69	1.01733	1.05025
8.7	0.97743	1.16218
8.71	0.97784	1.08729
8.72	0.98065	1.12103
8.73	0.96317	1.02213
8.74	0.96812	1.06761
8.75	0.96542	1.04205
8.76	0.98776	0.9951
8.77	1.0037	1.01143
8.78	0.98854	0.9965
8.79	0.95639	0.98982
8.8	0.9685	1.06179
8.81	0.96683	1.12245
8.82	0.97789	1.0397
8.83	0.96946	1.04005
8.84	0.95694	1.02019
8.85	0.9594	1.03987
8.86	0.96115	1.08933
8.87	0.95595	1.09135
8.88	0.96677	1.11605
8.89	0.95916	1.02737
8.9	0.95018	1.06486
8.91	0.97925	1.0534
8.92	0.97145	1.05622
8.93	0.94963	1.07969
8.94	0.94499	1.03402
8.95	0.98575	1.01195
8.96	0.9766	0.95882
8.97	0.95725	0.98274
8.98	0.92581	0.9417
8.99	0.96465	0.98071
9	0.97218	0.98492
9.01	0.97275	0.99691
9.02	0.96531	1.02691
9.03	1.00258	1.06413
9.04	1.00021	0.94491
9.05	0.97621	0.92577
9.06	0.99737	0.96504
9.07	0.97584	0.956
9.08	0.99562	1.02008
9.09	0.9735	1.01107
9.1	0.97176	1.00924
9.11	1.00538	1.00534
9.12	0.96842	1.046
9.13	0.95821	1.10255
9.14	0.95986	1.0686
9.15	0.97023	1.04428
9.16	0.96361	1.0583
9.17	0.9701	1.02322
9.18	1.01086	1.02097
9.19	1.03337	0.96198
9.2	0.99892	0.96148
9.21	1.00467	0.97261
9.22	0.995	0.97988
9.23	0.98988	1.00368
9.24	0.98801	1.00766
9.25	1.00123	0.95732
9.26	1.00474	0.98741
9.27	1.00029	0.98506
9.28	0.98517	0.98638
9.29	1.0001	0.98994
9.3	1.00038	0.99001
9.31	1.01311	0.9797
9.32	1.01909	0.96515
9.33	1.01136	0.99991
9.34	1.01184	0.94921
9.35	0.99059	0.9355
9.36	1.001	0.92913
9.37	1.01363	1.02098
9.38	1.01158	1.03011
9.39	0.98648	1.05871
9.4	0.97852	1.00596
9.41	0.97608	1.00136
9.42	1.01522	1.00286
9.43	0.95494	0.98793
9.44	0.98169	0.9736
9.45	0.97014	0.96279
9.46	1.01871	0.97035
9.47	0.97206	0.9498
9.48	0.99293	1.00654
9.49	1.00089	0.93179
9.5	1.00223	0.97406
9.51	0.98349	0.96322
9.52	0.97412	0.91188
9.53	0.9721	0.98061
9.54	0.98605	1.0085
9.55	0.96682	1.02527
9.56	0.96771	0.99049
9.57	1.00144	0.96558
9.58	0.97399	0.96005
9.59	0.96706	0.97327
9.6	0.98158	0.99542
9.61	1.00718	0.95226
9.62	0.99032	0.94892
9.63	0.99559	0.97778
9.64	1.02448	0.95467
9.65	1.05048	0.96221
9.66	1.01578	0.91633
9.67	1.02969	0.92706
9.68	1.00586	0.98024
9.69	0.99523	0.95436
9.7	0.97439	0.90386
9.71	1.0082	0.94174
9.72	0.9972	0.95943
9.73	0.97783	0.97875
9.74	0.97563	0.93627
9.75	0.99708	0.97945
9.76	0.98609	1.00356
9.77	1.01414	0.9103
9.78	1.00832	0.97432
9.79	0.97844	1.00854
9.8	0.99617	0.98235
9.81	0.98876	0.93873
9.82	1.00098	0.91596
9.83	0.98026	0.94554
9.84	0.9896	0.96334
9.85	0.97351	0.9981
9.86	0.96074	0.95053
9.87	0.98804	0.95994
9.88	0.99187	0.95735
9.89	0.96615	0.95468
9.9	0.97307	0.96383
9.91	1.00011	0.95066
9.92	0.96968	0.93644
9.93	0.98744	0.89653
9.94	0.9986	0.97824
9.95	0.99056	0.97687
9.96	0.98558	0.97657
9.97	1.00404	0.93045
9.98	0.99702	0.912
9.99	1.02793	0.97967
10	0.96658	0.98349

## Sheet: Figure 1H Con(GoF) v Gof Flicke
Flicker events per FOV shown in Fig 1H, each row is the number of flickers in an imaged FOV. Red text denotes data points which were identified as outliers by way of Grubbs test and removed from further analyses
Control(GoF)				Gain of Function
Flicker Events in FOV	Area (Microns)	Events/micron^2/ms		Flicker Events in FOV	Area (Microns)	Events/micron^2/ms
2	2931.35	0.07581		57	6124.45	1.03411
0	2651.9	0		38	2906.88	1.45249
1	1971.61	0.05636		5	6144.1	0.09042
17	3282.32	0.57547		449	10525.5	4.73979
0	3747.03	0		9	2882.69	0.3469
16	3071.56	0.57879		55	3336.58	1.83155
6	2497.01	0.26699		847	104635	18.4487
9	3399.03	0.2942		71	5960.16	1.3236
18	2818.05	0.70971		35	9026.89	0.43081
32	5022.11	0.70798		129	5830.91	2.45816
16	4904.42	0.36248		39	7547.79	0.57412
5	4059.05	0.13687		14	4286.87	0.36287
83	8156.37	1.13068		31	7528.63	0.45751
0	5762.17	0		47	3947.75	1.32284
40	9387.13	0.47346		16	5489.84	0.32383
0	1796.73	0		71	3788.71	2.08221
3	4453.36	0.07485		10	2451.48	0.45324
0	11307.9	0		54	6831.95	0.87823
8	4676.4	0.19008		89	8605.08	1.14919
9	9534.31	0.10488		276	9021.77	3.39918
3	3404.88	0.0979		27	6901.91	0.43466
2	3562.4	0.06238		442	9029.23	5.43912
5	7764.1	0.07155		143	6178.47	2.57165
17	8888.44	0.21251		83	5469.12	1.68624
25	8661.59	0.3207		8	3375	0.26337
16	3720.07	0.47789		71	5008.65	1.57505
2	5379.12	0.04131		4	2274.75	0.19538
8	7218.61	0.12314		8	9503.55	0.09353
14	8004.4	0.19434		42	8078.17	0.57769
78	6497.65	1.33381		268	6353.2	4.68705
3	4759.09	0.07004		65	6461.09	1.1178
37	6011.49	0.68388		11	3469.97	0.35223
30	7777.9	0.42856		11	6237.61	0.19594
54	3886.56	1.54378		3	6261.5	0.05324
113	6218.06	2.01921		121	5812	2.31322
96	6599.69	1.61624		11	5243.64	0.23309
10	2865.34	0.38778		37	7001.71	0.58716
113	6345.84	1.97855		10	3028.95	0.36683
1	3442.62	0.03228		10	4393.93	0.25287
206	137620	3.4115		37	4864.88	0.84506
				99	5967.76	1.84324
				50	2391.37	2.32317
				15	7164.3	0.23264
				0	3637.82	0
				26	7651.29	0.37757
				32	6115.68	0.58138
				40	4556.03	0.97551
				67	5862.99	1.26973
				175	7760.06	2.50571
				7	2012.75	0.38642
				50	9573.6	0.5803
				1	1422.41	0.07811
				20	251.027	8.85251

## Sheet: Figure 1J in vivo wound healing
Day 6 Wound Area (mm2)			Day 6 Wound Area (mm2)
Control(cKO)	cKO		Control(GoF)	GoF
33.9292	33.4265		43.9823	65.6593
51.5221	31.6672		50.2026	74.927
49.4801	55.292		67.3872	49.6686
77.7544	46.1814		38.4845	58.4336
47.7522	41.7832		45.5531	58.2765
37.5735	55.7947		51.3336	46.4956
48.3805	43.9823		49.4801	66.3504
44.7991	35.2487		36.1912	40.5894
55.292	47.5009		36.2854	45.2389
43.9823	56.1088		32.9867	53.1557
38.2018	13.3518		48.3805	51.8363
51.6792	7.53982		40.2124	64.4026
21.9912	19.1323		66.3504	57.177
24.5044	26.3894		43.9823	24.6301
88.5929	32.9867		30.1593	53.7212
36.7566	35.1858		48.0664	51.6792
52.8102	29.8451		30.1593	61.2611
53.4071	31.8558		40.9978	43.9823
	38.3588
	37.6991

## Sheet: Figure 1L Scratch Assay
Normalized Scratch Area			Normalized Scratch Area			Normalized Scratch Area
Control (cKO)	cKO		Control(GoF)	GoF		DMSO	+Yoda1
0.85208	1.84977		0.87228	0.69617		1.47057	0.00117
1.07564	1.20496		0.86533	0.69626		1.10445	1.05033
1.02244	1.33914		1.25552	0.6411		0.85093	0.59834
0.82404	2.09935		1.33038	0.85769		0.77531	0.26467
1.2258	1.263		1.12258	0.75251		0.79875	0.26687
1.9122	1.55632		1.02157	1.07061		0.87057	-0.2539
1.01953	1.49781		1.00452	1.39842		1.12943	-0.13391
0.53537	1.33928		0.98622	1.29264		0.75216	-0.05912
0.61754	1.50178		0.8067	1.1		0.4314	-0.35456
0.4946	1.05782		0.77277	0.66295		0.65057	-0.31784
1.24282	1.58519		1.20624	0.75665		2.16587	0.30215
1.17177	1.65128		1.33177	0.90903		0.86241	0.27945
1.4148	1.79101		0.89776	0.93062		1.24539	0.33753
0.59138	1.71844		0.92593	0.74118		0.8922	0.10811
1.01692	0.82755		0.96187	0.58936		0.9056	0.09126
1.26577	1.13785		0.97756	0.46779		1.0944	0.08449
1.36782	0.7171		0.9486	0.52527
1.10982	1.23663		0.90729	0.55038
1.09752	1.09747		0.80509	0.52374
0.98488	1.32104			0.43493
0.90536	1.0709			0.40786
1.20554	1.10004			0.26418
0.70021	1.56724			0.24081
0.63486	1.23094
0.71831	1.31027
0.99299	1.15466
0.93157	1.25462
1.04648	1.2721
1.02195	1.38047
	1.629
	1.26598
