# Supplementary material for: Spatiotemporal dynamics of PIEZO1 localization controls keratinocyte migration during wound healing
Source: eLife. 2021 Sep 27;10:e65415. doi: 10.7554/eLife.65415 (PMC8577841; doi:10.7554/eLife.65415)
Supplement: Figure 2—figure supplement 2—source data 1. — (Sheets 1,2) X,Y coordinates used to create trajectories from (Sheet 2) Piezo1-GoF and (Sheet 1) ControlGoF keratinocytes seen in Figure 2—figure supplement 2. [file elife-65415-fig2-figsupp2-data1.xlsx]

## Sheet: SuppFig5-Con(GoF) Trajectori
Plotted Trajectories for Supp Fig 5 and 6A Relative X and Relative Y are seen plotted for each trajectory
	Cell 1		Cell 2		Cell 3		Cell 4		Cell 5		Cell 6		Cell 7		Cell 8		Cell 9		Cell 10		Cell 11		Cell 12		Cell 13		Cell 14		Cell 15		Cell 16		Cell 17		Cell 18		Cell 19		Cell 20		Cell 21		Cell 22		Cell 23		Cell 24		Cell 25
Frame	relative X	relative Y	relative X	relative Y	relative X	relative Y	relative X	relative Y	relative X	relative Y	relative X	relative Y	relative X	relative Y	relative X	relative Y	relative X	relative Y	relative X	relative Y	relative X	relative Y	relative X	relative Y	relative X	relative Y	relative X	relative Y	relative X	relative Y	relative X	relative Y	relative X	relative Y	relative X	relative Y	relative X	relative Y	relative X	relative Y	relative X	relative Y	relative X	relative Y	relative X	relative Y	relative X	relative Y	relative X
1			0	0	0	0	0	0	0	0	0	0	0	0	0	0	0	0	0	0	0	0	0	0	0	0	0	0	0	0	0	0	0	0	0	0	0	0	0	0	0	0	0	0	0	0	0	0	0
2	0	0	-1.2964	1.2964	-6.482	10.3712	-6.482	0	-1.2964	-1.2964	-9.0748	-11.6676	1.2964	3.8892	1.9326	-1.9326	0.6442	0.6442	-2.5768	-4.5094	3.221	0	3.8652	-3.221	-3.8652	0	0.6442	0	2.5768	5.7978	-3.221	3.221	0	7.0862	1.2884	-2.5768	-7.0862	-2.5768	8.3746	-1.9326	5.1536	-1.9326	-1.9326	-3.221	6.442	1.9326	0	1.9326	4.5094
3	7.7784	-14.2604	1.2964	0	-14.2604	18.1496	-9.0748	1.2964	-3.8892	-5.1856	-14.2604	-22.0388	1.2964	6.482	3.8652	-0.6442	0	0	-8.3746	-9.663	3.8652	-1.2884	5.7978	-2.5768	-3.8652	0	1.2884	-0.6442	5.1536	10.9514	-8.3746	5.1536	-10.9514	7.0862	-1.2884	-3.221	-10.9514	-6.442	15.4608	-1.2884	7.0862	0	-5.1536	-7.0862	10.3072	3.8652	-7.7304	3.221	5.1536
4	14.2604	-24.6316	7.7784	-3.8892	-23.3352	27.2244	-11.6676	2.5928	-6.482	-10.3712	-12.964	-32.41	0	10.3712	3.221	0	0	0	-17.3934	-12.2398	3.8652	0.6442	6.442	-2.5768	-10.9514	0	1.2884	0	8.3746	14.8166	-10.3072	9.663	-10.9514	7.0862	-13.5282	-0.6442	-15.4608	-9.663	19.9702	-1.9326	10.9514	2.5768	-8.3746	-10.9514	14.1724	4.5094	-3.221	6.442	5.7978
5	14.2604	-37.5956	19.446	-7.7784	-27.2244	33.7064	-12.964	3.8892	-7.7784	-14.2604	-11.6676	-44.0776	2.5928	12.964	3.221	-0.6442	-0.6442	0.6442	-23.8354	-14.8166	1.9326	3.8652	8.3746	-1.9326	-18.0376	0	1.9326	-0.6442	16.105	16.7492	-12.2398	12.884	-10.9514	7.0862	-22.547	2.5768	-11.5956	-12.2398	23.8354	-1.9326	12.884	10.9514	-11.5956	-12.884	17.3934	5.1536	-1.9326	10.3072	7.7304
6	14.2604	-50.5596	20.7424	-15.5568	-33.7064	37.5956	-14.2604	9.0748	-9.0748	-15.5568	-11.6676	-53.1524	7.7784	14.2604	5.7978	-1.9326	-0.6442	1.2884	-28.989	-16.7492	3.221	4.5094	10.3072	-3.8652	-32.8542	-3.221	3.8652	-0.6442	22.547	19.326	-17.3934	15.4608	-18.0376	7.0862	-32.8542	-3.8652	-23.1912	-16.7492	27.7006	-2.5768	15.4608	12.884	-16.105	-14.8166	20.6144	5.7978	-2.5768	14.8166	13.5282
7	14.2604	-63.5236	18.1496	-23.3352	-40.1884	46.6704	-18.1496	6.482	-7.7784	-18.1496	-7.7784	-59.6344	6.482	16.8532	5.7978	-1.2884	0	1.2884	-37.3636	-15.4608	4.5094	3.8652	12.2398	-3.8652	-43.8056	-3.221	3.8652	0	28.989	19.9702	-18.6818	18.0376	-18.0376	7.0862	-38.652	-5.7978	-22.547	-18.6818	29.6332	-4.5094	17.3934	20.6144	-21.9028	-17.3934	23.8354	5.7978	-5.1536	18.0376	20.6144
8	12.964	-71.302	18.1496	-35.0028	-45.374	55.7452	-19.446	5.1856	-5.1856	-19.446	-3.8892	-68.7092	9.0748	19.446	6.442	0.6442	-0.6442	0.6442	-45.094	-16.105	4.5094	4.5094	14.1724	-4.5094	-50.8918	7.7304	4.5094	1.2884	34.1426	19.9702	-18.0376	24.4796	-18.0376	7.0862	-39.2962	-10.9514	-30.2774	-23.1912	32.21	-5.1536	22.547	22.547	-28.989	-16.7492	27.0564	5.7978	-1.9326	23.1912	32.8542
9	16.8532	-73.8948	7.7784	-45.374	-49.2632	64.82	-2.5928	-2.5928	-1.2964	-20.7424	0	-76.4876	10.3712	22.0388	6.442	0.6442	-0.6442	0.6442	-52.8244	-14.8166	5.1536	5.7978	14.1724	-3.8652	-54.757	7.7304	6.442	1.9326	41.873	19.9702	-19.9702	30.2774	-25.1238	7.0862	-36.7194	-24.4796	-35.431	-27.7006	34.7868	-6.442	30.2774	27.0564	-36.7194	-13.5282	31.5658	5.1536	-1.9326	26.4122	41.873
10	32.41	-82.9696	7.7784	-51.856	-55.7452	71.302	5.1856	-2.5928	1.2964	-22.0388	1.2964	-81.6732	16.8532	22.0388	8.3746	1.2884	-0.6442	0.6442	-59.9106	-15.4608	5.7978	6.442	14.1724	-3.8652	-50.8918	10.9514	7.7304	1.9326	47.0266	22.547	-21.9028	33.4984	-21.9028	3.8652	-47.0266	-36.7194	-39.2962	-28.3448	37.3636	-7.0862	41.873	30.9216	-42.5172	-7.7304	35.431	3.221	-0.6442	29.6332	50.2476
11	38.892	-92.0444	7.7784	-53.1524	-59.6344	77.784	7.7784	1.2964	2.5928	-19.446	6.482	-89.4516	24.6316	23.3352	9.663	0	-0.6442	1.2884	-61.199	-19.326	2.5768	5.1536	17.3934	-5.1536	-54.757	10.9514	10.3072	2.5768	52.1802	27.7006	-25.1238	39.9404	-25.1238	3.8652	-58.6222	-48.315	-45.094	-30.2774	41.873	-8.3746	50.8918	34.7868	-42.5172	-2.5768	38.652	1.2884	0	33.4984	57.3338
12	35.0028	-105.008	7.7784	-55.7452	-67.4128	79.0804	6.482	3.8892	3.8892	-19.446	12.964	-102.416	32.41	22.0388	10.9514	0.6442	-2.5768	1.9326	-63.1316	-19.9702	-3.221	3.8652	17.3934	-4.5094	-62.4874	10.9514	11.5956	3.221	55.4012	33.4984	-28.989	41.873	-28.989	3.8652	-62.4874	-57.978	-50.2476	-38.652	46.3824	-8.3746	55.4012	41.2288	-39.9404	1.2884	43.8056	-6.442	1.2884	37.3636	63.7758
13	24.6316	-117.972	0	-76.4876	-76.4876	75.1912	9.0748	6.482	11.6676	-19.446	19.446	-110.194	37.5956	20.7424	9.663	1.2884	-2.5768	2.5768	-65.0642	-14.8166	-6.442	12.884	18.6818	-3.8652	-65.7084	10.9514	13.5282	2.5768	57.978	37.3636	-32.21	43.8056	-28.989	3.8652	-63.7758	-66.9968	-55.4012	-41.873	48.315	-12.2398	59.9106	45.094	-38.652	7.7304	45.094	-10.3072	1.2884	41.2288	67.641
14	20.7424	-121.862	3.8892	-67.4128	-85.5624	70.0056	9.0748	11.6676	16.8532	-16.8532	27.2244	-115.38	45.374	14.2604	11.5956	1.9326	-4.5094	3.8652	-63.1316	-16.7492	-5.7978	14.8166	19.326	-1.9326	-73.4388	10.9514	12.884	3.8652	58.6222	41.873	-34.7868	47.0266	-32.8542	3.8652	-65.0642	-74.7272	-60.5548	-41.873	48.9592	-16.7492	61.8432	54.1128	-34.7868	12.884	45.094	-17.3934	1.9326	44.4498	77.304
15	11.6676	-127.047	7.7784	-60.9308	-89.4516	63.5236	3.8892	15.5568	20.7424	-16.8532	31.1136	-115.38	49.2632	11.6676	11.5956	0.6442	-5.1536	3.8652	-62.4874	-10.3072	-7.7304	13.5282	19.326	-3.221	-80.525	10.9514	14.8166	3.8652	59.2664	47.6708	-34.1426	56.0454	-32.8542	3.8652	-67.641	-79.8808	-69.5736	-41.873	50.2476	-20.6144	59.2664	65.0642	-31.5658	18.0376	41.2288	-26.4122	-1.2884	47.0266	82.4576
16	11.6676	-130.936	9.0748	-57.0416	-89.4516	59.6344	1.2964	19.446	23.3352	-14.2604	33.7064	-110.194	54.4488	10.3712	12.884	0.6442	-5.1536	3.8652	-57.978	-7.0862	-8.3746	11.5956	21.2586	-1.9326	-84.3902	10.9514	16.105	4.5094	60.5548	52.1802	-32.8542	61.8432	-32.8542	3.8652	-71.5062	-86.3228	-75.3714	-42.5172	51.536	-24.4796	63.7758	70.2178	-26.4122	19.9702	38.652	-30.9216	-5.7978	49.6034	79.8808
17	11.6676	-132.233	16.8532	-62.2272	-90.748	51.856	0	20.7424	27.2244	-11.6676	42.7812	-102.416	59.6344	7.7784	12.884	2.5768	-4.5094	3.8652	-54.1128	-4.5094	-10.3072	11.5956	21.9028	-1.2884	-91.4764	7.7304	18.0376	5.7978	61.8432	55.4012	-38.0078	63.7758	-36.0752	3.8652	-76.6598	-99.2068	-77.9482	-43.1614	50.8918	-27.7006	68.9294	77.304	-23.8354	23.1912	36.0752	-34.7868	-10.3072	51.536	76.0156
18	16.8532	-134.826	19.446	-59.6344	-88.1552	40.1884	1.2964	20.7424	28.5208	-9.0748	45.374	-93.3408	60.9308	1.2964	13.5282	3.8652	-4.5094	3.8652	-48.315	5.1536	-12.2398	12.2398	22.547	-0.6442	-95.3416	7.7304	19.326	6.442	63.1316	58.6222	-45.094	66.3526	-39.9404	3.8652	-81.8134	-110.158	-81.8134	-41.2288	48.9592	-30.9216	72.7946	85.0344	-17.3934	22.547	30.9216	-38.652	-12.884	53.4686	68.9294
19	22.0388	-127.047	12.964	-55.7452	-86.8588	29.8172	1.2964	20.7424	31.1136	-6.482	47.9668	-82.9696	63.5236	-1.2964	13.5282	4.5094	-3.8652	3.8652	-36.7194	7.7304	-17.3934	-3.221	21.9028	-0.6442	-102.428	7.7304	19.326	5.7978	62.4874	63.7758	-48.315	69.5736	-39.9404	0	-87.6112	-116.6	-80.525	-40.5846	50.2476	-34.1426	74.083	92.1206	-10.9514	21.2586	28.3448	-41.873	-16.105	56.0454	58.6222
20	27.2244	-111.49	11.6676	-54.4488	-82.9696	20.7424	6.482	19.446	31.1136	-2.5928	46.6704	-77.784	64.82	-3.8892	13.5282	4.5094	-3.221	3.221	-28.3448	12.884	-22.547	-5.1536	23.8354	-0.6442	-102.428	7.7304	19.9702	4.5094	63.1316	68.2852	-47.0266	74.083	-47.0266	7.0862	-97.9184	-121.754	-81.1692	-39.9404	53.4686	-37.3636	79.8808	97.9184	-2.5768	14.8166	23.1912	-45.7382	-29.6332	55.4012	48.315
21	28.5208	-98.5264	11.6676	-41.4848	-80.3768	19.446	11.6676	20.7424	31.1136	1.2964	42.7812	-71.302	67.4128	-6.482	14.1724	4.5094	-1.2884	3.221	-22.547	16.7492	-28.989	-5.7978	26.4122	1.2884	-102.428	0	21.9028	5.1536	65.7084	71.5062	-47.0266	79.8808	-47.0266	7.0862	-107.581	-124.975	-79.8808	-38.652	56.0454	-41.2288	86.3228	101.139	3.8652	3.221	19.9702	-48.315	-33.4984	57.3338	40.5846
22	32.41	-84.266	10.3712	-35.0028	-77.784	20.7424	14.2604	20.7424	29.8172	5.1856	20.7424	-54.4488	67.4128	-11.6676	14.8166	5.7978	0.6442	1.9326	-16.105	18.0376	-34.7868	-5.7978	27.0564	1.9326	-109.514	-3.221	21.2586	5.1536	68.2852	75.3714	-47.0266	83.1018	-50.8918	7.0862	-121.754	-128.196	-79.2366	-38.652	56.0454	-44.4498	94.6974	106.293	10.3072	-1.9326	15.4608	-50.8918	-38.652	57.978	28.989
23	37.5956	-64.82	5.1856	-29.8172	-75.1912	22.0388	28.5208	9.0748	28.5208	6.482	11.6676	-44.0776	64.82	-19.446	14.8166	6.442	0.6442	0	-7.0862	17.3934	-40.5846	-1.2884	27.7006	5.7978	-109.514	-14.1724	20.6144	6.442	70.862	79.2366	-48.315	87.6112	-54.757	7.0862	-136.57	-132.705	-72.1504	-38.0078	58.6222	-47.0266	103.072	114.668	16.105	-2.5768	10.3072	-52.1802	-41.873	57.978	19.9702
24	33.7064	-50.5596	3.8892	-22.0388	-70.0056	24.6316	40.1884	6.482	24.6316	9.0748	2.5928	-37.5956	60.9308	-27.2244	14.8166	6.442	0	-2.5768	6.442	14.1724	-51.536	-15.4608	29.6332	5.7978	-106.293	-21.9028	20.6144	6.442	70.2178	83.746	-49.6034	92.7648	-61.8432	7.0862	-146.233	-134.638	-65.7084	-33.4984	61.199	-49.6034	108.87	117.889	23.1912	-2.5768	4.5094	-52.1802	-43.1614	59.9106	7.7304
25	28.5208	-36.2992	3.8892	-15.5568	-68.7092	27.2244	49.2632	3.8892	22.0388	9.0748	-5.1856	-32.41	57.0416	-33.7064	15.4608	7.7304	-1.9326	-5.1536	16.105	14.1724	-58.6222	-19.326	28.3448	7.0862	-106.293	-21.9028	21.2586	6.442	70.862	88.8996	-45.7382	97.2742	-65.7084	10.9514	-159.762	-139.791	-57.3338	-27.0564	63.7758	-52.1802	119.177	116.6	28.3448	-3.221	-1.2884	-50.8918	-45.094	61.199	-2.5768
26	28.5208	-29.8172	3.8892	-1.2964	-67.4128	31.1136	53.1524	5.1856	19.446	10.3712	-10.3712	-18.1496	54.4488	-38.892	16.7492	7.0862	-2.5768	-7.0862	24.4796	10.9514	-57.978	0	30.9216	8.3746	-106.293	-25.1238	22.547	6.442	73.4388	92.7648	-46.3824	100.495	-65.7084	10.9514	-171.357	-143.657	-49.6034	-22.547	65.0642	-56.0454	125.619	122.398	33.4984	-5.1536	-5.1536	-50.2476	-46.3824	63.1316	-10.3072
27	27.2244	-27.2244	5.1856	15.5568	-63.5236	40.1884	54.4488	2.5928	16.8532	7.7784	-19.446	-10.3712	51.856	-42.7812	14.8166	7.0862	-3.221	-8.3746	27.7006	6.442	-42.5172	16.7492	32.21	8.3746	-109.514	-28.989	22.547	6.442	75.3714	96.63	-43.1614	105.005	-68.9294	10.9514	-181.02	-140.436	-43.1614	-19.9702	66.3526	-58.6222	133.349	132.705	39.2962	-3.8652	-8.3746	-52.1802	-48.9592	64.42	-19.326
28	23.3352	-15.5568	7.7784	31.1136	-58.338	53.1524	58.338	0	11.6676	5.1856	-25.928	2.5928	47.9668	-45.374	16.7492	9.663	-3.221	-9.663	27.0564	-4.5094	-36.7194	24.4796	32.21	9.0188	-109.514	-28.989	23.1912	5.7978	76.0156	101.784	-42.5172	108.87	-65.7084	10.9514	-191.327	-142.368	-39.2962	-17.3934	66.3526	-63.7758	139.791	141.724	45.094	0.6442	-12.884	-54.1128	-50.8918	66.9968	-27.0564
29	23.3352	3.8892	10.3712	36.2992	-53.1524	67.4128	60.9308	-1.2964	9.0748	1.2964	-35.0028	12.964	42.7812	-46.6704	17.3934	8.3746	-2.5768	-9.663	23.8354	-15.4608	-38.0078	29.6332	34.7868	10.3072	-117.244	-28.989	23.8354	5.1536	77.304	106.293	-39.2962	113.379	-68.9294	10.9514	-202.279	-144.301	-35.431	-12.2398	64.42	-68.9294	144.301	148.81	50.2476	5.7978	-15.4608	-57.3338	-52.1802	68.2852	-30.2774
30	27.2244	14.2604	9.0748	42.7812	-49.2632	76.4876	68.7092	5.1856	6.482	-1.2964	-38.892	27.2244	41.4848	-50.5596	18.6818	8.3746	-1.9326	-9.0188	21.9028	-22.547	-36.7194	34.7868	33.4984	12.2398	-131.417	-39.9404	24.4796	5.7978	79.2366	110.158	-36.0752	119.177	-68.9294	18.0376	-210.009	-143.012	-26.4122	-10.3072	61.199	-72.7946	150.743	153.32	55.4012	7.7304	-18.0376	-60.5548	-36.0752	76.6598	-24.4796
31	31.1136	23.3352	9.0748	41.4848	-42.7812	88.1552	72.5984	9.0748	5.1856	-5.1856	-42.7812	38.892	41.4848	-53.1524	19.326	8.3746	-0.6442	-6.442	18.0376	-29.6332	-34.7868	40.5846	35.431	12.884	-131.417	-39.9404	26.4122	5.7978	79.8808	113.379	-31.5658	124.331	-80.525	18.0376	-215.807	-138.503	-19.326	-12.884	57.3338	-76.6598	159.117	157.829	61.199	8.3746	-18.6818	-63.7758	-36.7194	79.2366	-23.8354
32	33.7064	33.7064	15.5568	44.0776	-37.5956	94.6372	73.8948	12.964	3.8892	-7.7784	-37.5956	47.9668	38.892	-55.7452	19.9702	9.663	-1.9326	-3.8652	4.5094	-41.2288	-33.4984	43.1614	36.0752	12.2398	-142.368	-39.9404	26.4122	7.0862	81.1692	115.956	-31.5658	128.84	-80.525	18.0376	-223.537	-130.773	-13.5282	-20.6144	53.4686	-81.1692	165.559	165.559	65.7084	9.663	-19.326	-68.9294	-36.0752	81.8134	-14.1724
33	36.2992	50.5596	24.6316	49.2632	-36.2992	98.5264	77.784	15.5568	3.8892	-10.3712	-29.8172	58.338	33.7064	-58.338	22.547	9.0188	-2.5768	0	-6.442	-45.094	-43.8056	35.431	35.431	14.8166	-150.099	-39.9404	27.7006	6.442	82.4576	118.533	-35.431	134.638	-83.746	18.0376	-229.979	-119.177	-7.7304	-25.1238	53.4686	-85.0344	167.492	171.357	68.2852	9.0188	-22.547	-72.7946	-35.431	85.0344	-5.7978
34	38.892	59.6344	23.3352	57.0416	-38.892	102.416	77.784	20.7424	3.8892	-11.6676	-12.964	68.7092	28.5208	-59.6344	23.1912	9.0188	-4.5094	1.9326	-11.5956	-55.4012	-32.21	43.8056	36.0752	16.105	-153.964	-32.8542	28.3448	4.5094	83.1018	121.754	-38.652	139.791	-87.6112	28.989	-234.489	-108.226	-6.442	-28.3448	53.4686	-88.8996	166.848	179.088	70.2178	3.8652	-27.0564	-76.6598	-32.8542	88.8996	-0.6442
35	44.0776	71.302	24.6316	64.82	-33.7064	102.416	79.0804	24.6316	3.8892	-12.964	1.2964	66.1164	23.3352	-58.338	24.4796	8.3746	-5.7978	5.1536	-15.4608	-62.4874	-32.8542	45.7382	37.3636	17.3934	-153.964	-28.989	30.2774	5.1536	84.3902	124.975	-37.3636	143.012	-91.4764	28.989	-232.556	-99.851	-1.9326	-32.21	54.757	-92.7648	168.78	188.106	71.5062	-1.2884	-30.9216	-80.525	-30.9216	92.7648	7.0862
36	47.9668	80.3768	23.3352	66.1164	-25.928	99.8228	79.0804	27.2244	3.8892	-12.964	14.2604	66.1164	18.1496	-58.338	26.4122	9.663	-6.442	7.0862	-21.9028	-63.7758	-32.8542	50.2476	39.2962	18.0376	-161.05	-39.9404	32.21	5.7978	88.2554	128.196	-38.0078	144.945	-91.4764	25.768	-230.624	-92.1206	0	-33.4984	58.6222	-97.2742	172.001	196.481	69.5736	-9.0188	-34.1426	-83.746	-28.989	96.63	12.884
37	54.4488	82.9696	31.1136	64.82	-19.446	95.9336	73.8948	28.5208	3.8892	-14.2604	20.7424	60.9308	14.2604	-57.0416	27.0564	10.3072	-5.7978	9.663	-28.3448	-63.1316	-40.5846	44.4498	41.2288	19.326	-161.05	-32.8542	33.4984	5.7978	94.0532	130.773	-39.9404	146.233	-87.6112	25.768	-223.537	-82.4576	1.9326	-36.7194	59.2664	-101.139	172.001	202.279	64.42	-11.5956	-38.652	-88.8996	-28.3448	100.495	18.0376
38	58.338	81.6732	35.0028	68.7092	-10.3712	95.9336	63.5236	22.0388	5.1856	-15.5568	24.6316	55.7452	11.6676	-58.338	30.2774	10.9514	-5.7978	14.8166	-33.4984	-67.641	-39.2962	44.4498	43.8056	19.9702	-164.915	-47.6708	33.4984	5.1536	97.9184	133.994	-46.3824	152.675	-91.4764	25.768	-215.163	-75.3714	2.5768	-39.2962	58.6222	-104.36	177.799	208.721	68.2852	-16.7492	-42.5172	-93.409	-27.7006	102.428	28.989
39	57.0416	82.9696	37.5956	64.82	0	92.0444	50.5596	31.1136	6.482	-15.5568	15.5568	44.0776	7.7784	-57.0416	32.8542	10.3072	-7.0862	21.2586	-39.2962	-68.9294	-39.2962	46.3824	44.4498	21.9028	-172.001	-50.8918	34.7868	3.8652	101.784	137.215	-46.3824	159.762	-98.5626	25.768	-208.077	-70.862	1.2884	-41.873	57.3338	-106.937	182.953	214.519	69.5736	-21.2586	-46.3824	-97.2742	-25.768	103.716	35.431
40	51.856	81.6732	40.1884	64.82	7.7784	88.1552	40.1884	32.41	6.482	-16.8532	5.1856	38.892	5.1856	-58.338	36.0752	9.663	-6.442	24.4796	-46.3824	-59.2664	-38.0078	48.9592	45.7382	21.9028	-172.001	-58.6222	34.1426	4.5094	105.005	138.503	-46.3824	166.848	-98.5626	32.8542	-204.856	-67.641	-1.9326	-48.315	55.4012	-108.226	185.53	219.672	72.7946	-25.1238	-50.8918	-100.495	-23.8354	104.36	42.5172
41	36.2992	68.7092	45.374	66.1164	16.8532	93.3408	33.7064	33.7064	7.7784	-15.5568	-7.7784	33.7064	2.5928	-57.0416	36.7194	10.9514	-6.442	25.768	-48.315	-61.199	-44.4498	47.0266	47.0266	23.8354	-179.088	-58.6222	32.8542	5.7978	107.581	141.08	-45.094	173.934	-102.428	32.8542	-199.702	-66.3526	-7.7304	-50.8918	50.2476	-106.937	195.837	223.537	72.1504	-28.989	-56.6896	-104.36	-21.9028	106.293	52.8244
42	22.0388	57.0416	58.338	64.82	16.8532	92.0444	25.928	35.0028	10.3712	-14.2604	-19.446	27.2244	-1.2964	-55.7452	39.9404	9.663	-5.7978	25.1238	-50.2476	-53.4686	-52.8244	47.6708	45.7382	24.4796	-186.818	-54.757	32.21	7.0862	110.158	143.657	-39.9404	177.799	-102.428	32.8542	-190.039	-69.5736	-13.5282	-52.8244	46.3824	-106.293	205.5	225.47	71.5062	-32.21	-60.5548	-107.581	-19.9702	109.514	58.6222
43	9.0748	44.0776	68.7092	67.4128	15.5568	85.5624	16.8532	33.7064	12.964	-12.964	-31.1136	23.3352	-2.5928	-55.7452	41.873	9.0188	-5.1536	25.768	-52.8244	-36.7194	-48.9592	48.9592	48.9592	24.4796	-186.818	-58.6222	31.5658	8.3746	112.735	146.878	-36.0752	182.309	-105.649	32.8542	-182.953	-72.7946	-14.8166	-57.3338	44.4498	-105.005	211.298	228.047	74.083	-32.21	-65.0642	-109.514	-19.326	111.447	62.4874
44	0	40.1884	81.6732	73.8948	20.7424	77.784	9.0748	28.5208	14.2604	-9.0748	-38.892	18.1496	-5.1856	-55.7452	42.5172	8.3746	-4.5094	23.8354	-47.6708	-21.2586	-36.7194	48.315	50.2476	25.768	-197.769	-47.6708	31.5658	7.7304	114.668	150.743	-29.6332	186.174	-105.649	32.8542	-179.088	-82.4576	-12.884	-63.7758	44.4498	-92.1206	217.74	227.403	77.9482	-31.5658	-71.5062	-110.802	-19.9702	113.379	65.7084
45	-7.7784	35.0028	93.3408	70.0056	25.928	72.5984	1.2964	27.2244	15.5568	-5.1856	-49.2632	6.482	-6.482	-55.7452	44.4498	7.7304	-3.8652	23.1912	-45.7382	-9.0188	-29.6332	52.1802	50.8918	28.3448	-200.99	-47.6708	31.5658	9.663	117.889	153.32	-24.4796	188.751	-109.514	32.8542	-180.376	-94.0532	-9.0188	-65.7084	43.1614	-90.8322	223.537	228.047	83.1018	-29.6332	-76.6598	-114.023	-21.2586	115.312	68.9294
46	-16.8532	29.8172	101.119	76.4876	29.8172	72.5984	-5.1856	22.0388	16.8532	-1.2964	-54.4488	-9.0748	-9.0748	-54.4488	46.3824	6.442	-3.221	21.2586	-38.0078	-0.6442	-24.4796	55.4012	52.1802	28.3448	-200.99	-47.6708	30.9216	11.5956	119.177	157.185	-21.2586	193.904	-109.514	36.7194	-190.039	-101.139	-3.8652	-63.7758	39.9404	-92.7648	230.624	228.047	86.967	-32.21	-79.2366	-116.6	-18.6818	117.244	70.2178
47	-28.5208	24.6316	108.898	84.266	25.928	76.4876	-10.3712	19.446	19.446	0	-58.338	-22.0388	-11.6676	-53.1524	47.6708	6.442	-4.5094	20.6144	-42.5172	9.663	-19.9702	58.6222	54.1128	28.989	-200.99	-47.6708	30.9216	13.5282	122.398	161.694	-16.7492	197.769	-113.379	36.7194	-200.346	-105.005	0	-52.1802	34.1426	-108.226	237.71	229.335	90.188	-32.8542	-85.0344	-119.821	-5.7978	119.177	63.7758
48	-36.2992	19.446	117.972	85.5624	22.0388	76.4876	-18.1496	16.8532	22.0388	1.2964	-60.9308	-32.41	-15.5568	-49.2632	50.2476	6.442	-5.7978	19.326	-46.3824	16.7492	-16.7492	57.978	54.757	30.2774	-208.721	-39.9404	31.5658	12.2398	124.331	165.559	-14.8166	202.923	-116.6	36.7194	-207.432	-108.226	-3.221	-43.1614	27.7006	-115.312	242.219	229.979	91.4764	-30.9216	-90.188	-121.754	-2.5768	125.619	59.2664
49	-44.0776	14.2604	123.158	90.748	20.7424	77.784	-24.6316	11.6676	22.0388	2.5928	-60.9308	-44.0776	-18.1496	-46.6704	53.4686	5.7978	-9.0188	19.9702	-47.0266	23.8354	-8.3746	55.4012	54.1128	32.8542	-215.807	-39.9404	32.21	13.5282	126.263	168.78	-16.105	206.788	-120.465	43.8056	-213.874	-104.36	-6.442	-37.3636	23.1912	-119.177	248.017	229.979	90.8322	-30.9216	-94.6974	-123.042	-2.5768	132.061	54.757
50	-49.2632	3.8892	127.047	92.0444	2.5928	82.9696	-31.1136	7.7784	23.3352	3.8892	-67.4128	-51.856	-19.446	-45.374	56.0454	6.442	-10.9514	19.326	-49.6034	28.989	-11.5956	51.536	55.4012	34.7868	-219.672	-39.9404	34.7868	12.2398	128.84	171.357	-21.2586	212.586	-120.465	43.8056	-225.47	-97.9184	-7.7304	-32.8542	20.6144	-121.11	254.459	231.268	90.188	-30.9216	-98.5626	-126.263	-0.6442	134.638	57.3338
51	-53.1524	-3.8892	130.936	92.0444	-10.3712	85.5624	-37.5956	0	22.0388	9.0748	-71.302	-58.338	-19.446	-42.7812	58.6222	5.1536	-14.8166	19.326	-53.4686	33.4984	-14.8166	48.315	56.0454	36.7194	-222.893	-39.9404	38.0078	12.884	132.705	174.578	-25.768	220.316	-124.331	47.6708	-229.335	-94.6974	-7.7304	-30.9216	20.6144	-124.331	260.901	235.777	86.967	-29.6332	-103.072	-128.84	0	138.503	56.0454
52	-59.6344	-9.0748	138.715	94.6372	-22.0388	89.4516	-44.0776	-1.2964	18.1496	12.964	-75.1912	-63.5236	-20.7424	-38.892	58.6222	5.1536	-16.7492	19.326	-57.978	38.0078	-16.7492	47.0266	57.3338	38.0078	-219.672	-28.989	41.2288	13.5282	136.57	175.867	-25.768	225.47	-124.331	50.8918	-230.624	-95.3416	-8.3746	-27.7006	19.326	-127.552	264.766	242.863	81.1692	-23.8354	-107.581	-130.128	-1.9326	146.233	53.4686
53	-67.4128	-12.964	142.604	97.23	-32.41	93.3408	-46.6704	-3.8892	16.8532	15.5568	-76.4876	-63.5236	-20.7424	-36.2992	59.9106	5.7978	-17.3934	19.326	-58.6222	41.873	-16.7492	43.8056	57.978	39.9404	-226.758	-28.989	42.5172	14.8166	141.08	176.511	-25.768	228.691	-127.552	54.757	-228.047	-112.091	-12.884	-28.3448	17.3934	-130.773	269.276	246.729	77.304	-18.0376	-112.091	-130.773	-7.7304	157.829	56.0454
54	-68.7092	-16.8532	143.9	106.305	-42.7812	92.0444	-47.9668	-9.0748	14.2604	18.1496	-77.784	-59.6344	-20.7424	-31.1136	61.8432	4.5094	-18.0376	19.9702	-57.3338	47.6708	-18.0376	39.9404	58.6222	41.2288	-226.758	-25.1238	44.4498	16.105	145.589	175.867	-24.4796	233.2	-127.552	54.757	-220.316	-125.619	-21.2586	-30.2774	14.8166	-132.061	270.564	255.103	72.7946	-12.884	-117.244	-132.061	-5.7978	164.915	56.6896
55	-67.4128	-24.6316	145.197	108.898	-44.0776	93.3408	-50.5596	-15.5568	12.964	20.7424	-85.5624	-51.856	-22.0388	-27.2244	65.0642	3.8652	-18.0376	22.547	-47.0266	57.978	-18.0376	34.1426	59.9106	41.2288	-230.624	-25.1238	45.094	18.6818	151.387	174.578	-19.9702	238.998	-127.552	54.757	-217.095	-137.215	-28.3448	-28.989	12.2398	-133.349	275.718	257.68	66.3526	-7.7304	-123.686	-133.349	-4.5094	170.069	56.6896
56	-60.9308	-28.5208	147.79	112.787	-42.7812	93.3408	-53.1524	-18.1496	11.6676	23.3352	-92.0444	-51.856	-23.3352	-24.6316	68.2852	1.9326	-18.6818	25.768	-38.0078	66.9968	-16.105	26.4122	61.8432	43.1614	-237.71	-25.1238	44.4498	19.9702	154.608	175.867	-15.4608	244.152	-124.331	61.8432	-213.23	-143.657	-32.8542	-28.989	10.3072	-134.638	279.583	261.545	58.6222	-0.6442	-128.196	-135.282	1.2884	175.222	57.978
57	-53.1524	-33.7064	147.79	112.787	-47.9668	85.5624	-53.1524	-22.0388	10.3712	23.3352	-98.5264	-53.1524	-22.0388	-20.7424	70.2178	1.9326	-19.326	29.6332	-28.3448	71.5062	-9.0188	16.7492	63.7758	43.8056	-241.575	-25.1238	45.094	19.9702	157.185	175.867	-10.3072	247.373	-124.331	61.8432	-204.856	-145.589	-39.2962	-28.989	6.442	-134.638	281.515	265.41	53.4686	5.1536	-133.349	-135.926	9.663	179.088	59.2664
58	-44.0776	-35.0028	149.086	115.38	-51.856	77.784	-57.0416	-23.3352	11.6676	24.6316	-110.194	-59.6344	-22.0388	-19.446	71.5062	1.2884	-18.6818	32.21	-24.4796	76.6598	0	9.0188	63.7758	45.7382	-252.526	-25.1238	47.0266	20.6144	160.406	175.867	-5.7978	248.661	-131.417	61.8432	-194.548	-143.657	-43.1614	-25.768	2.5768	-131.417	283.448	266.699	37.3636	-2.5768	-139.147	-137.859	15.4608	182.309	59.9106
59	-38.892	-33.7064	150.382	115.38	-54.4488	67.4128	-55.7452	-27.2244	11.6676	24.6316	-117.972	-64.82	-20.7424	-18.1496	74.7272	-1.2884	-17.3934	32.8542	-16.105	76.6598	8.3746	9.0188	67.641	45.7382	-248.661	-21.9028	47.6708	19.326	164.915	175.867	0	248.017	-135.282	61.8432	-189.395	-141.08	-45.7382	-19.9702	-2.5768	-126.263	284.736	269.92	30.2774	-2.5768	-143.657	-137.859	19.326	185.53	62.4874
60	-36.2992	-27.2244	155.568	114.083	-58.338	58.338	-57.0416	-25.928	12.964	24.6316	-120.565	-71.302	-18.1496	-14.2604	76.6598	-2.5768	-16.105	32.21	-7.7304	75.3714	16.7492	4.5094	70.2178	47.6708	-252.526	-14.1724	48.9592	18.6818	169.425	176.511	5.1536	245.44	-127.552	69.5736	-184.241	-143.657	-45.7382	-11.5956	-5.7978	-122.398	286.669	273.141	27.0564	-1.2884	-148.81	-135.926	23.1912	185.53	65.0642
61	-28.5208	-19.446	159.457	111.49	-62.2272	50.5596	-55.7452	-23.3352	12.964	25.928	-137.418	-63.5236	-19.446	-11.6676	79.2366	-1.9326	-14.8166	30.9216	-3.221	79.2366	25.768	-3.8652	72.7946	48.315	-248.661	-7.0862	48.9592	19.9702	175.222	177.155	6.442	246.084	-131.417	69.5736	-178.443	-145.589	-41.2288	-5.7978	-7.7304	-116.6	288.602	277.006	25.768	1.2884	-153.964	-137.215	27.7006	184.241	68.2852
62	-16.8532	-12.964	163.346	107.601	-63.5236	44.0776	-49.2632	-27.2244	12.964	24.6316	-149.086	-71.302	-18.1496	-7.7784	83.1018	-0.6442	-16.105	30.9216	2.5768	78.5924	32.8542	-10.9514	76.0156	50.2476	-256.392	-7.0862	50.2476	20.6144	179.732	179.088	13.5282	235.777	-131.417	76.6598	-180.376	-156.541	-38.0078	-5.1536	-5.7978	-112.735	291.178	280.871	25.1238	2.5768	-159.117	-143.012	31.5658	182.309	69.5736
63	-2.5928	-3.8892	172.421	110.194	-68.7092	41.4848	-42.7812	-31.1136	12.964	24.6316	-154.272	-76.4876	-16.8532	-6.482	83.746	-1.2884	-18.0376	28.989	8.3746	76.6598	35.431	-19.9702	74.7272	51.536	-259.613	-7.0862	52.1802	23.8354	184.241	177.799	18.6818	231.268	-131.417	76.6598	-179.088	-152.675	-36.7194	-5.1536	-3.8652	-108.226	292.467	286.669	24.4796	6.442	-162.983	-146.878	32.8542	181.02	71.5062
64	14.2604	0	178.903	107.601	-80.3768	40.1884	-36.2992	-32.41	12.964	20.7424	-159.457	-86.8588	-16.8532	-3.8892	85.6786	-3.221	-19.9702	24.4796	16.7492	72.1504	36.7194	-27.0564	76.6598	54.1128	-259.613	0	54.1128	25.768	186.818	177.799	23.8354	227.403	-135.282	76.6598	-177.799	-151.387	-36.7194	-7.0862	-3.8652	-106.937	290.534	295.688	23.1912	10.9514	-168.78	-148.166	34.1426	177.799	72.1504
65	24.6316	6.482	182.792	108.898	-85.5624	33.7064	-33.7064	-35.0028	11.6676	15.5568	-164.643	-95.9336	-16.8532	-1.2964	87.6112	-3.8652	-23.1912	21.9028	27.0564	71.5062	37.3636	-41.2288	76.0156	56.6896	-263.478	0	57.3338	25.768	187.462	179.088	28.989	226.758	-135.282	76.6598	-178.443	-152.031	-38.652	-11.5956	-2.5768	-105.649	289.246	299.553	36.0752	32.21	-174.578	-148.166	34.7868	172.001	70.2178
66	35.0028	11.6676	182.792	111.49	-89.4516	29.8172	-36.2992	-28.5208	12.964	14.2604	-171.125	-103.712	-16.8532	1.2964	88.8996	-5.1536	-24.4796	19.9702	35.431	72.1504	43.1614	-51.536	77.9482	56.6896	-270.564	0	59.2664	21.2586	191.327	176.511	34.1426	230.624	-142.368	80.525	-178.443	-151.387	-38.0078	-17.3934	-2.5768	-103.716	289.246	302.13	36.0752	37.3636	-178.443	-148.166	36.7194	163.627	68.9294
67	44.0776	16.8532	181.496	112.787	-95.9336	28.5208	-40.1884	-24.6316	15.5568	11.6676	-177.607	-110.194	-14.2604	3.8892	91.4764	-3.221	-27.0564	18.6818	42.5172	70.862	48.315	-55.4012	79.2366	57.978	-270.564	-7.0862	58.6222	14.8166	195.193	175.867	38.652	233.845	-142.368	83.746	-190.039	-149.454	-38.652	-23.1912	0.6442	-101.784	286.025	305.351	36.7194	43.1614	-182.309	-148.166	36.7194	157.829	66.3526
68	53.1524	19.446	181.496	114.083	-102.416	28.5208	-41.4848	-22.0388	16.8532	9.0748	-186.682	-115.38	-9.0748	6.482	95.9858	-3.8652	-28.3448	18.6818	46.3824	73.4388	51.536	-54.1128	80.525	59.2664	-270.564	-3.221	59.9106	7.7304	199.058	175.867	42.5172	235.777	-142.368	83.746	-202.923	-151.387	-36.0752	-28.3448	6.442	-99.2068	273.785	303.418	37.3636	46.3824	-185.53	-148.166	36.7194	155.252	63.7758
69	62.2272	25.928	181.496	114.083	-105.008	28.5208	-47.9668	-6.482	16.8532	6.482	-190.571	-120.565	-3.8892	7.7784	96.63	-3.8652	-29.6332	16.7492	50.8918	82.4576	53.4686	-57.3338	81.8134	60.5548	-274.429	-3.221	61.8432	10.9514	202.279	175.222	45.094	237.71	-138.503	83.746	-210.009	-150.743	-32.8542	-30.2774	14.1724	-98.5626	267.343	293.111	38.652	49.6034	-189.395	-146.878	39.9404	146.233	61.199
70	64.82	45.374	184.089	117.972	-107.601	29.8172	-60.9308	15.5568	18.1496	3.8892	-193.164	-125.751	0	9.0748	100.495	-3.221	-30.2774	15.4608	54.757	92.7648	54.1128	-59.2664	83.1018	61.8432	-274.429	-7.0862	63.7758	10.9514	206.144	176.511	46.3824	239.642	-138.503	87.6112	-215.807	-150.099	-27.0564	-34.1426	19.9702	-98.5626	267.343	286.669	31.5658	52.8244	-193.26	-143.657	37.3636	143.012	56.6896
71	67.4128	60.9308	186.682	121.862	-107.601	35.0028	-62.2272	16.8532	19.446	3.8892	-197.053	-128.344	3.8892	11.6676	103.716	-3.8652	-32.21	15.4608	61.199	97.9184	58.6222	-59.2664	84.3902	63.1316	-278.294	-7.0862	65.0642	7.0862	210.009	177.155	47.0266	249.95	-138.503	95.3416	-215.163	-153.964	-27.7006	-37.3636	25.768	-101.139	267.343	281.515	21.9028	53.4686	-196.481	-141.08	29.6332	141.724	51.536
72	71.302	73.8948	190.571	123.158	-107.601	38.892	-60.9308	12.964	20.7424	1.2964	-202.238	-136.122	3.8892	11.6676	106.293	-3.221	-34.7868	13.5282	66.3526	102.428	60.5548	-55.4012	85.0344	64.42	-278.294	0	65.0642	2.5768	211.942	177.155	47.6708	255.103	-146.233	95.3416	-216.451	-151.387	-34.1426	-42.5172	30.2774	-106.937	267.987	276.362	16.7492	57.3338	-200.346	-137.859	21.2586	140.436	46.3824
73	58.338	82.9696	195.756	128.344	-110.194	42.7812	-29.8172	-6.482	23.3352	1.2964	-208.72	-142.604	6.482	12.964	108.226	-3.8652	-36.0752	10.9514	65.7084	111.447	58.6222	-47.6708	85.0344	65.0642	-278.294	0	59.9106	-1.9326	214.519	180.376	47.6708	258.324	-146.233	95.3416	-219.028	-144.301	-36.0752	-47.6708	34.1426	-112.735	267.987	272.497	11.5956	60.5548	-204.211	-132.705	6.442	145.589	43.8056
74	42.7812	92.0444	197.053	133.529	-110.194	42.7812	-19.446	-18.1496	25.928	0	-215.202	-146.493	6.482	14.2604	108.87	-3.221	-36.7194	8.3746	65.7084	117.244	52.1802	-35.431	86.967	65.7084	-289.246	10.9514	64.42	-7.0862	217.095	177.799	50.8918	258.324	-149.454	95.3416	-218.384	-135.282	-34.1426	-52.1802	35.431	-119.821	264.766	269.276	8.3746	61.8432	-207.432	-129.484	-13.5282	159.762	42.5172
75	38.892	102.416	199.646	137.418	-107.601	38.892	-12.964	-3.8892	27.2244	-1.2964	-217.795	-150.382	7.7784	12.964	111.447	-2.5768	-37.3636	6.442	72.1504	119.177	37.3636	-51.536	88.8996	67.641	-289.246	10.9514	52.8244	-6.442	220.316	177.799	53.4686	257.036	-149.454	98.5626	-217.74	-132.061	-34.1426	-57.3338	32.21	-128.84	262.834	266.699	8.3746	66.3526	-208.721	-126.263	-15.4608	159.117	39.9404
76	33.7064	112.787	200.942	141.308	-102.416	38.892	-18.1496	2.5928	29.8172	-1.2964	-220.388	-150.382	9.0748	12.964	113.379	-3.8652	-37.3636	7.0862	76.6598	122.398	32.8542	-54.757	89.5438	68.2852	-292.467	10.9514	54.757	-8.3746	222.893	176.511	56.0454	253.815	-142.368	102.428	-215.163	-132.061	-31.5658	-63.1316	25.1238	-134.638	259.613	265.41	9.0188	68.2852	-210.009	-120.465	-16.105	148.81	30.9216
77	23.3352	112.787	199.646	142.604	-98.5264	36.2992	-16.8532	10.3712	32.41	-2.5928	-224.277	-149.086	10.3712	12.964	115.956	-3.8652	-37.3636	6.442	78.5924	125.619	28.3448	-56.0454	91.4764	70.2178	-292.467	10.9514	51.536	-10.3072	225.47	174.578	60.5548	249.95	-142.368	106.293	-218.384	-131.417	-28.3448	-65.7084	17.3934	-135.282	258.968	263.478	10.9514	71.5062	-212.586	-115.312	-20.6144	150.099	22.547
78	18.1496	114.083	200.942	138.715	-95.9336	36.2992	-15.5568	23.3352	33.7064	-1.2964	-222.981	-151.679	11.6676	12.964	119.177	-4.5094	-36.7194	6.442	82.4576	133.349	16.105	-63.1316	95.3416	72.7946	-292.467	0	50.8918	-12.884	227.403	174.578	65.0642	246.084	-142.368	109.514	-222.893	-129.484	-24.4796	-72.1504	9.663	-133.349	261.545	259.613	10.3072	74.7272	-214.519	-113.379	-22.547	146.233	20.6144
79	5.1856	121.862	208.72	133.529	-93.3408	37.5956	-11.6676	33.7064	37.5956	-2.5928	-208.72	-169.828	12.964	12.964	120.465	-5.1536	-37.3636	5.7978	86.967	141.724	6.442	-69.5736	98.5626	73.4388	-292.467	0	48.315	-12.884	230.624	175.222	69.5736	240.287	-146.233	109.514	-237.066	-121.754	-26.4122	-79.8808	4.5094	-129.484	273.785	251.238	14.1724	77.304	-217.095	-109.514	-24.4796	146.233	16.7492
80	-6.482	132.233	212.61	133.529	-89.4516	37.5956	-7.7784	44.0776	42.7812	0	-186.682	-175.014	14.2604	12.964	121.754	-5.7978	-37.3636	5.1536	87.6112	150.099	1.2884	-72.1504	99.851	74.083	-296.332	0	47.0266	-14.1724	233.845	175.222	73.4388	236.421	-149.454	109.514	-240.931	-115.956	-25.768	-90.188	0.6442	-124.331	281.515	246.729	13.5282	80.525	-219.028	-106.293	-29.6332	152.675	14.8166
81	-22.0388	137.418	215.202	134.826	-79.0804	38.892	-6.482	53.1524	49.2632	1.2964	-202.238	-168.532	15.5568	15.5568	123.042	-5.7978	-38.0078	3.8652	85.0344	153.964	-0.6442	-76.6598	99.851	76.0156	-296.332	-14.1724	46.3824	-15.4608	237.066	174.578	74.7272	235.133	-157.185	113.379	-238.354	-106.293	-25.768	-95.3416	-1.9326	-117.244	286.669	244.796	10.9514	83.1018	-223.537	-102.428	-32.8542	159.117	11.5956
82	-33.7064	138.715	222.981	136.122	-72.5984	38.892	-6.482	63.5236	53.1524	2.5928	-208.72	-168.532	16.8532	14.2604	124.975	-7.7304	-37.3636	1.2884	81.8134	154.608	-2.5768	-81.1692	102.428	79.2366	-296.332	-14.1724	47.6708	-17.3934	239.642	173.29	75.3714	231.912	-153.32	113.379	-230.624	-100.495	-28.3448	-98.5626	-0.6442	-109.514	289.246	242.219	12.2398	85.0344	-226.114	-100.495	-38.652	172.646	3.8652
83	-41.4848	149.086	228.166	132.233	-64.82	41.4848	-2.5928	71.302	58.338	3.8892	-208.72	-169.828	19.446	14.2604	125.619	-7.7304	-36.0752	-1.9326	79.2366	155.252	11.5956	-63.7758	105.005	81.8134	-296.332	-21.9028	49.6034	-20.6144	242.219	172.001	76.0156	226.758	-153.32	113.379	-219.028	-97.9184	-35.431	-99.2068	3.8652	-102.428	289.89	239.642	14.1724	85.6786	-227.403	-95.3416	-18.0376	194.548	0
84	-55.7452	146.493	239.834	123.158	-57.0416	38.892	0	82.9696	62.2272	6.482	-210.017	-169.828	20.7424	14.2604	126.907	-10.3072	-34.1426	-4.5094	72.7946	156.541	13.5282	-69.5736	107.581	83.1018	-296.332	-25.1238	49.6034	-20.6144	244.796	169.425	73.4388	221.605	-153.32	120.465	-213.874	-96.63	-44.4498	-99.851	16.105	-99.851	285.381	233.2	14.8166	88.8996	-229.979	-92.7648	-16.105	199.702	0.6442
85	-58.338	147.79	252.798	116.676	-49.2632	37.5956	-3.8892	90.748	68.7092	9.0748	-206.128	-169.828	23.3352	12.964	128.196	-9.0188	-30.9216	-6.442	61.199	150.743	14.8166	-63.7758	108.226	84.3902	-296.332	-25.1238	49.6034	-24.4796	247.373	166.848	72.7946	217.095	-153.32	131.417	-212.586	-95.9858	-51.536	-97.2742	22.547	-99.851	281.515	228.047	14.8166	90.8322	-233.845	-90.8322	-20.6144	188.751	3.221
86	-59.6344	150.382	260.576	111.49	-38.892	36.2992	-12.964	103.712	72.5984	10.3712	-203.535	-180.2	24.6316	14.2604	132.061	-9.663	-27.0564	-7.7304	66.3526	146.233	14.8166	-60.5548	110.158	85.6786	-292.467	-28.989	50.2476	-24.4796	249.305	166.204	68.2852	213.23	-157.185	131.417	-207.432	-92.7648	-57.978	-95.3416	27.7006	-100.495	278.294	223.537	19.326	95.3416	-235.777	-90.188	-18.6818	191.972	3.8652
87	-67.4128	158.161	268.355	110.194	-29.8172	35.0028	-16.8532	114.083	76.4876	9.0748	-211.313	-191.867	25.928	14.2604	135.282	-12.2398	-23.8354	-8.3746	57.3338	132.705	-5.1536	-59.2664	113.379	85.6786	-289.246	-28.989	49.6034	-25.768	252.526	162.338	67.641	210.653	-160.406	131.417	-199.702	-86.3228	-66.9968	-92.1206	32.21	-102.428	279.583	219.028	22.547	97.9184	-240.287	-92.7648	-21.9028	197.769	5.7978
88	-68.7092	165.939	277.43	114.083	-19.446	29.8172	-20.7424	120.565	79.0804	9.0748	-220.388	-195.756	27.2244	14.2604	135.926	-14.8166	-20.6144	-9.0188	66.3526	124.331	-4.5094	-55.4012	115.312	85.0344	-281.515	-28.989	48.9592	-23.1912	256.392	159.117	68.2852	209.365	-160.406	131.417	-194.548	-79.8808	-74.7272	-91.4764	36.0752	-105.649	284.092	215.807	21.2586	100.495	-246.084	-97.9184	-19.326	205.5	9.0188
89	-71.302	173.718	286.504	116.676	-11.6676	28.5208	-28.5208	124.454	80.3768	9.0748	-225.574	-197.053	27.2244	14.2604	139.791	-15.4608	-19.326	-9.0188	72.7946	121.11	-3.8652	-49.6034	118.533	85.0344	-278.294	-28.989	49.6034	-37.3636	258.968	159.117	66.3526	208.077	-168.136	135.282	-186.174	-76.0156	-79.8808	-90.188	39.2962	-110.802	286.025	214.519	24.4796	102.428	-251.238	-99.851	-8.3746	199.058	9.663
90	-73.8948	178.903	294.283	119.269	-1.2964	27.2244	-49.2632	129.64	80.3768	7.7784	-229.463	-200.942	28.5208	15.5568	140.436	-16.105	-18.6818	-7.7304	83.746	117.244	15.4608	-33.4984	121.754	85.0344	-274.429	-28.989	66.9968	-45.7382	260.257	157.185	59.2664	208.077	-168.136	135.282	-183.597	-72.7946	-84.3902	-86.967	42.5172	-117.244	287.957	213.23	28.989	103.716	-255.747	-99.851	12.884	199.702	12.884
91	-80.3768	191.867	300.765	117.972	7.7784	24.6316	-58.338	130.936	81.6732	5.1856	-239.834	-203.535	29.8172	15.5568	142.368	-17.3934	-18.0376	-8.3746	90.188	118.533	15.4608	-31.5658	124.975	83.746	-270.564	-21.9028	67.641	-45.7382	260.901	153.964	52.8244	207.432	-171.357	135.282	-186.818	-74.7272	-88.2554	-83.746	42.5172	-123.042	288.602	212.586	28.3448	106.937	-258.968	-100.495	12.884	188.751	15.4608
92	-88.1552	211.313	307.247	111.49	16.8532	18.1496	-66.1164	130.936	82.9696	2.5928	-251.502	-206.128	32.41	15.5568	144.945	-18.0376	-17.3934	-9.0188	94.6974	120.465	14.8166	-30.2774	129.484	82.4576	-267.343	-14.1724	67.641	-45.7382	262.189	152.675	50.2476	204.211	-175.222	131.417	-193.904	-84.3902	-90.8322	-79.8808	44.4498	-124.975	289.89	210.653	29.6332	108.226	-261.545	-100.495	7.7304	181.02	21.2586
93	-88.1552	224.277	313.729	107.601	23.3352	10.3712	-73.8948	134.826	84.266	0	-257.984	-210.017	32.41	14.2604	146.233	-18.6818	-18.0376	-9.663	96.63	120.465	28.3448	-29.6332	131.417	82.4576	-267.343	-14.1724	67.641	-45.7382	262.189	150.099	49.6034	200.346	-175.222	131.417	-194.548	-93.409	-92.7648	-74.7272	48.315	-125.619	289.89	210.009	31.5658	109.514	-263.478	-101.139	4.5094	176.511	27.0564
94	-85.5624	235.945	320.211	102.416	28.5208	6.482	-80.3768	137.418	84.266	-1.2964	-261.873	-210.017	35.0028	12.964	146.878	-18.0376	-20.6144	-9.663	96.63	124.331	28.3448	-30.2774	135.282	81.1692	-267.343	-7.0862	67.641	-45.7382	262.834	147.522	49.6034	196.481	-171.357	146.233	-201.635	-97.9184	-94.6974	-70.2178	52.1802	-124.331	289.89	209.365	34.7868	110.802	-265.41	-101.139	-5.1536	173.29	33.4984
95	-88.1552	245.02	327.989	99.8228	37.5956	3.8892	-88.1552	137.418	85.5624	-2.5928	-264.466	-213.906	36.2992	11.6676	149.454	-21.2586	-23.8354	-10.9514	90.8322	135.282	24.4796	-25.1238	137.859	79.8808	-267.343	-7.0862	68.2852	-46.3824	262.189	142.368	46.3824	193.26	-175.222	150.099	-204.856	-103.072	-96.63	-66.9968	54.757	-125.619	289.246	209.365	36.7194	112.091	-266.699	-100.495	-12.2398	170.713	39.9404
96	-92.0444	256.687	335.768	98.5264	44.0776	1.2964	-97.23	136.122	85.5624	-1.2964	-269.651	-217.795	40.1884	9.0748	151.387	-21.9028	-25.1238	-10.9514	86.3228	135.926	21.2586	-21.9028	141.08	77.9482	-267.343	-3.221	68.2852	-45.7382	262.834	137.859	45.094	190.039	-175.222	146.233	-205.5	-103.716	-99.2068	-64.42	57.978	-124.975	288.602	208.721	35.431	113.379	-269.276	-99.2068	-14.8166	167.492	44.4498
97	-93.3408	269.651	344.842	102.416	50.5596	1.2964	-105.008	137.418	84.266	0	-277.43	-226.87	42.7812	6.482	152.675	-23.1912	-27.0564	-12.2398	74.7272	139.147	18.0376	-19.326	143.012	77.9482	-270.564	-3.221	68.2852	-45.7382	266.055	132.061	43.1614	186.818	-179.088	150.099	-213.23	-99.851	-101.139	-58.6222	61.199	-118.533	286.669	206.788	37.3636	117.244	-272.497	-97.9184	-18.0376	165.559	47.0266
98	-93.3408	285.208	352.621	105.008	55.7452	5.1856	-111.49	138.715	84.266	0	-287.801	-234.648	45.374	3.8892	155.896	-23.1912	-30.2774	-15.4608	66.9968	133.994	10.3072	-16.7492	144.301	78.5924	-285.381	0	68.9294	-46.3824	265.41	128.196	41.2288	183.597	-179.088	157.185	-224.182	-97.2742	-102.428	-52.1802	63.1316	-110.802	286.025	204.856	39.2962	115.956	-274.429	-97.2742	-29.6332	153.964	48.315
99	-92.0444	299.468	361.696	101.119	60.9308	9.0748	-116.676	142.604	82.9696	0	-291.69	-241.13	47.9668	2.5928	159.762	-23.1912	-34.1426	-18.6818	59.2664	132.705	-2.5768	-18.6818	147.522	77.304	-289.246	0	67.641	-44.4498	266.699	124.331	38.0078	181.664	-182.953	157.185	-232.556	-100.495	-103.072	-50.2476	60.5548	-102.428	285.381	203.567	40.5846	115.956	-277.006	-94.0532	-26.4122	165.559	47.6708
100	-92.0444	316.322	370.77	98.5264	60.9308	10.3712	-119.269	145.197	81.6732	1.2964	-292.986	-248.909	50.5596	0	162.983	-23.8354	-34.7868	-21.2586	58.6222	124.331	-21.9028	-38.652	147.522	76.0156	-292.467	0	68.2852	-45.094	266.699	122.398	35.431	180.376	-182.953	157.185	-238.998	-106.937	-101.139	-46.3824	55.4012	-99.851	285.381	202.279	41.2288	110.802	-278.939	-88.8996	-32.8542	172.001	48.9592
[truncated: 57 more columns]

## Sheet: SuppFig5-GoF Trajectories
Plotted Trajectories for Supp Fig 5 and 6A Relative X and Relative Y are seen plotted for each trajectory
	Cell 1		Cell 2		Cell 3		Cell 4		Cell 5		Cell 6		Cell 7		Cell 8		Cell 9		Cell 10		Cell 11		Cell 12		Cell 13		Cell 14		Cell 15		Cell 16		Cell 17		Cell 18		Cell 19		Cell 20		Cell 21		Cell 22		Cell 23		Cell 24		Cell 25
Frame	relative X	relative Y	relative X	relative Y	relative X	relative Y	relative X	relative Y	relative X	relative Y	relative X	relative Y	relative X	relative Y	relative X	relative Y	relative X	relative Y	relative X	relative Y	relative X	relative Y	relative X	relative Y	relative X	relative Y	relative X	relative Y	relative X	relative Y	relative X	relative Y	relative X	relative Y	relative X	relative Y	relative X	relative Y	relative X	relative Y	relative X	relative Y	relative X	relative Y	relative X	relative Y	relative X	relative Y	relative X
1			0	0	0	0	0	0	0	0	0	0	0	0	0	0	0	0	0	0	0	0	0	0	0	0	0	0	0	0	0	0	0	0	0	0	0	0	0	0	0	0	0	0	0	0	0	0	0
2	0	0	-6.482	-3.8892	-12.964	6.482	-12.964	-10.3712	0	2.5928	-2.5928	-2.5928	5.1856	10.3712	-3.8892	2.5928	6.482	1.2964	7.7784	-3.8892	1.2964	2.5928	0	0	-1.2964	6.482	6.482	-9.0748	1.2964	-3.8892	-3.8892	6.482	10.3712	0	-2.5928	7.7784	0	0	-3.8892	-3.8892	2.5768	3.221	0	7.0862	3.8652	1.2884	0	-0.6442	9.0188
3	0	7.7784	-12.964	-9.0748	-24.6316	12.964	-19.446	-18.1496	-2.5928	1.2964	-5.1856	-1.2964	11.6676	15.5568	-7.7784	5.1856	14.2604	0	19.446	-3.8892	2.5928	5.1856	-6.482	-6.482	-9.0748	10.3712	9.0748	-15.5568	2.5928	-7.7784	-6.482	6.482	10.3712	0	-3.8892	14.2604	-3.8892	0	-6.482	-3.8892	4.5094	4.5094	0	7.0862	9.663	1.2884	-3.8652	0	12.2398
4	0	23.3352	-18.1496	-15.5568	-29.8172	16.8532	-16.8532	-32.41	-11.6676	-2.5928	-6.482	2.5928	14.2604	15.5568	-11.6676	3.8892	19.446	0	25.928	-11.6676	2.5928	7.7784	-6.482	-16.8532	-28.5208	16.8532	12.964	-27.2244	1.2964	-11.6676	-10.3712	6.482	10.3712	-6.482	-5.1856	16.8532	2.5928	0	-19.446	-3.8892	5.7978	5.7978	7.0862	7.0862	16.105	1.2884	-5.7978	-1.9326	16.105
5	-9.0748	33.7064	-20.7424	-24.6316	-29.8172	22.0388	-31.1136	-47.9668	-16.8532	-9.0748	-2.5928	3.8892	16.8532	18.1496	-16.8532	5.1856	22.0388	0	27.2244	-14.2604	3.8892	10.3712	0	-19.446	-37.5956	19.446	16.8532	-38.892	1.2964	-16.8532	-10.3712	3.8892	16.8532	0	-5.1856	20.7424	0	3.8892	-16.8532	-3.8892	5.7978	7.0862	3.221	7.0862	19.326	3.221	-9.0188	-4.5094	18.0376
6	-15.5568	36.2992	-22.0388	-33.7064	-31.1136	25.928	-28.5208	-53.1524	-19.446	-9.0748	5.1856	10.3712	14.2604	24.6316	-23.3352	6.482	25.928	0	32.41	-14.2604	3.8892	12.964	0	-23.3352	-46.6704	27.2244	19.446	-47.9668	-3.8892	-20.7424	-10.3712	10.3712	16.8532	-10.3712	-6.482	23.3352	-7.7784	-2.5928	-25.928	0	3.8652	11.5956	10.9514	7.0862	25.1238	5.1536	-11.5956	-4.5094	18.6818
7	-15.5568	46.6704	-23.3352	-42.7812	-35.0028	33.7064	-23.3352	-47.9668	-19.446	-14.2604	10.3712	14.2604	14.2604	27.2244	-29.8172	3.8892	28.5208	0	29.8172	-11.6676	5.1856	14.2604	7.7784	-16.8532	-50.5596	32.41	19.446	-58.338	-9.0748	-27.2244	-6.482	23.3352	16.8532	-6.482	-12.964	29.8172	-3.8892	-6.482	-36.2992	2.5928	1.2884	13.5282	14.1724	0	26.4122	10.3072	-13.5282	-7.0862	18.0376
8	-19.446	55.7452	-25.928	-51.856	-33.7064	36.2992	-25.928	-32.41	-16.8532	-18.1496	12.964	11.6676	5.1856	19.446	-32.41	5.1856	31.1136	0	31.1136	-3.8892	9.0748	14.2604	16.8532	0	-50.5596	32.41	25.928	-64.82	-9.0748	-28.5208	2.5928	25.928	16.8532	-6.482	-18.1496	32.41	0	-6.482	-45.374	9.0748	-3.8652	19.9702	14.1724	0	29.6332	9.663	-14.8166	-9.0188	14.1724
9	-22.0388	66.1164	-29.8172	-59.6344	-35.0028	37.5956	-27.2244	-18.1496	1.2964	-24.6316	10.3712	3.8892	0	10.3712	-29.8172	11.6676	35.0028	3.8892	35.0028	2.5928	10.3712	15.5568	10.3712	0	-41.4848	63.5236	28.5208	-72.5984	-10.3712	-29.8172	9.0748	25.928	19.446	-6.482	-24.6316	31.1136	0	-9.0748	-55.7452	9.0748	-7.7304	22.547	18.0376	7.0862	34.1426	9.663	-15.4608	-12.2398	10.9514
10	-22.0388	82.9696	-33.7064	-68.7092	-36.2992	36.2992	-22.0388	-6.482	5.1856	-28.5208	6.482	2.5928	-7.7784	-5.1856	-31.1136	15.5568	37.5956	3.8892	33.7064	9.0748	11.6676	15.5568	7.7784	2.5928	-29.8172	70.0056	31.1136	-77.784	-11.6676	-31.1136	22.0388	23.3352	10.3712	-6.482	-27.2244	32.41	2.5928	-12.964	-53.1524	12.964	-10.9514	14.8166	25.1238	7.0862	38.0078	9.0188	-15.4608	-16.105	8.3746
11	-22.0388	89.4516	-38.892	-76.4876	-41.4848	33.7064	-19.446	6.482	6.482	-32.41	2.5928	6.482	-19.446	-15.5568	-31.1136	18.1496	38.892	6.482	29.8172	10.3712	12.964	16.8532	7.7784	2.5928	-27.2244	68.7092	33.7064	-81.6732	-11.6676	-29.8172	28.5208	19.446	-12.964	-10.3712	-29.8172	35.0028	9.0748	-19.446	-59.6344	19.446	-12.2398	15.4608	21.9028	7.0862	43.8056	8.3746	-14.1724	-18.0376	9.0188
12	-28.5208	95.9336	-44.0776	-85.5624	-47.9668	31.1136	-14.2604	22.0388	6.482	-35.0028	2.5928	9.0748	-32.41	-25.928	-31.1136	19.446	38.892	3.8892	25.928	12.964	14.2604	18.1496	7.7784	-3.8892	-22.0388	66.1164	38.892	-86.8588	-10.3712	-28.5208	38.892	12.964	-19.446	0	-32.41	35.0028	12.964	-19.446	-66.1164	19.446	-14.8166	14.1724	28.989	7.0862	47.6708	5.7978	-12.884	-21.9028	7.0862
13	-28.5208	105.008	-47.9668	-94.6372	-53.1524	32.41	-5.1856	36.2992	6.482	-35.0028	-3.8892	12.964	-41.4848	-40.1884	-27.2244	22.0388	37.5956	5.1856	23.3352	11.6676	16.8532	16.8532	7.7784	0	-16.8532	58.338	46.6704	-93.3408	-5.1856	-24.6316	38.892	12.964	-25.928	2.5928	-36.2992	37.5956	22.0388	-22.0388	-68.7092	22.0388	-21.2586	8.3746	32.8542	7.0862	50.2476	5.7978	-14.8166	-25.1238	2.5768
14	-28.5208	111.49	-47.9668	-101.119	-59.6344	35.0028	10.3712	42.7812	7.7784	-38.892	-1.2964	12.964	-38.892	-51.856	-44.0776	5.1856	38.892	6.482	19.446	7.7784	19.446	15.5568	14.2604	-6.482	-10.3712	44.0776	55.7452	-102.416	-2.5928	-10.3712	45.374	6.482	-25.928	0	-42.7812	38.892	32.41	-25.928	-75.1912	22.0388	-28.3448	1.9326	36.7194	0	54.1128	4.5094	-14.1724	-28.3448	-0.6442
15	-28.5208	125.751	-49.2632	-108.898	-64.82	33.7064	19.446	45.374	10.3712	-45.374	-5.1856	11.6676	-38.892	-60.9308	-47.9668	1.2964	37.5956	10.3712	23.3352	3.8892	23.3352	15.5568	14.2604	-6.482	-2.5928	35.0028	73.8948	-105.008	1.2964	-5.1856	51.856	0	-29.8172	0	-47.9668	41.4848	45.374	-19.446	-85.5624	22.0388	-32.8542	-1.2884	39.9404	-3.8652	56.0454	6.442	-10.3072	-32.8542	-2.5768
16	-28.5208	134.826	-53.1524	-114.083	-71.302	38.892	29.8172	38.892	12.964	-49.2632	-3.8892	14.2604	-40.1884	-57.0416	-51.856	1.2964	37.5956	14.2604	28.5208	1.2964	28.5208	15.5568	10.3712	-10.3712	2.5928	29.8172	85.5624	-106.305	6.482	2.5928	45.374	-9.0748	-29.8172	6.482	-55.7452	44.0776	51.856	-12.964	-88.1552	22.0388	-35.431	-4.5094	43.8056	0	61.199	8.3746	-9.663	-34.1426	0.6442
17	-28.5208	141.308	-58.338	-121.862	-76.4876	46.6704	25.928	16.8532	15.5568	-53.1524	2.5928	9.0748	-42.7812	-58.338	-57.0416	2.5928	37.5956	14.2604	36.2992	-5.1856	31.1136	15.5568	10.3712	-6.482	2.5928	19.446	92.0444	-111.49	10.3712	6.482	45.374	-22.0388	-36.2992	2.5928	-60.9308	45.374	64.82	-19.446	-98.5264	22.0388	-39.9404	-5.1536	43.8056	0	65.7084	6.442	-9.0188	-36.7194	-0.6442
18	-28.5208	154.272	-62.2272	-129.64	-80.3768	60.9308	15.5568	11.6676	19.446	-64.82	-2.5928	7.7784	-42.7812	-58.338	-58.338	7.7784	36.2992	16.8532	41.4848	-14.2604	32.41	14.2604	10.3712	-6.482	5.1856	11.6676	97.23	-115.38	18.1496	12.964	45.374	-25.928	-42.7812	2.5928	-63.5236	47.9668	77.784	-19.446	-111.49	25.928	-45.094	-7.0862	50.8918	-3.8652	68.9294	6.442	-7.7304	-38.652	-1.2884
19	-38.892	164.643	-67.4128	-138.715	-89.4516	71.302	9.0748	10.3712	22.0388	-75.1912	1.2964	3.8892	-44.0776	-62.2272	-62.2272	16.8532	35.0028	18.1496	53.1524	-9.0748	36.2992	12.964	7.7784	-3.8892	11.6676	7.7784	95.9336	-119.269	22.0388	19.446	42.7812	-32.41	-45.374	2.5928	-67.4128	47.9668	81.6732	-12.964	-108.898	25.928	-48.9592	-9.663	50.8918	-3.8652	72.1504	4.5094	-6.442	-41.873	-3.221
20	-38.892	167.236	-71.302	-145.197	-94.6372	77.784	7.7784	-1.2964	25.928	-81.6732	2.5928	0	-29.8172	-54.4488	-67.4128	24.6316	33.7064	16.8532	53.1524	1.2964	37.5956	11.6676	-6.482	6.482	19.446	-1.2964	99.8228	-119.269	23.3352	22.0388	36.2992	-32.41	-45.374	2.5928	-70.0056	49.2632	94.6372	-19.446	-117.972	32.41	-52.8244	-10.3072	54.757	-10.9514	76.0156	4.5094	-2.5768	-45.7382	-7.0862
21	-38.892	177.607	-72.5984	-151.679	-98.5264	82.9696	-2.5928	-10.3712	25.928	-82.9696	1.2964	2.5928	-22.0388	-51.856	-76.4876	27.2244	32.41	16.8532	49.2632	12.964	38.892	11.6676	-12.964	0	31.1136	-3.8892	105.008	-121.862	25.928	24.6316	38.892	-42.7812	-49.2632	2.5928	-72.5984	47.9668	107.601	-19.446	-117.972	35.0028	-56.0454	-9.663	54.757	-14.8166	81.1692	5.1536	1.2884	-48.315	-9.0188
22	-42.7812	181.496	-75.1912	-158.161	-105.008	86.8588	-5.1856	-23.3352	28.5208	-85.5624	6.482	2.5928	-11.6676	-46.6704	-81.6732	32.41	31.1136	16.8532	49.2632	23.3352	38.892	10.3712	-19.446	2.5928	44.0776	-6.482	108.898	-124.454	25.928	25.928	25.928	-42.7812	-49.2632	6.482	-75.1912	46.6704	111.49	-19.446	-121.862	35.0028	-57.978	-10.9514	58.6222	-14.8166	85.0344	4.5094	4.5094	-49.6034	-13.5282
23	-51.856	190.571	-77.784	-164.643	-112.787	92.0444	-5.1856	-38.892	32.41	-84.266	9.0748	1.2964	-7.7784	-35.0028	-85.5624	35.0028	29.8172	16.8532	53.1524	19.446	38.892	9.0748	-22.0388	0	57.0416	-11.6676	115.38	-125.751	27.2244	25.928	22.0388	-42.7812	-55.7452	6.482	-79.0804	44.0776	117.972	-29.8172	-128.344	41.4848	-59.9106	-11.5956	58.6222	-18.6818	87.6112	4.5094	10.3072	-50.2476	-19.9702
24	-55.7452	203.535	-82.9696	-171.125	-121.862	94.6372	-3.8892	-53.1524	33.7064	-81.6732	10.3712	0	6.482	-23.3352	-89.4516	37.5956	28.5208	16.8532	57.0416	9.0748	38.892	10.3712	-28.5208	-6.482	66.1164	-15.5568	121.862	-124.454	28.5208	23.3352	12.964	-32.41	-58.338	6.482	-80.3768	44.0776	124.454	-36.2992	-130.936	45.374	-61.8432	-10.9514	58.6222	-18.6818	90.8322	2.5768	16.7492	-49.6034	-28.3448
25	-51.856	213.906	-86.8588	-181.496	-132.233	89.4516	7.7784	-63.5236	35.0028	-77.784	9.0748	0	15.5568	-22.0388	-95.9336	38.892	28.5208	16.8532	55.7452	-1.2964	40.1884	10.3712	-28.5208	-6.482	72.5984	-18.1496	132.233	-121.862	29.8172	23.3352	12.964	-22.0388	-58.338	6.482	-81.6732	40.1884	137.418	-32.41	-134.826	49.2632	-65.0642	-10.9514	58.6222	-18.6818	94.0532	1.2884	22.547	-50.2476	-34.1426
26	-51.856	222.981	-88.1552	-190.571	-134.826	92.0444	12.964	-79.0804	36.2992	-76.4876	7.7784	0	25.928	-16.8532	-101.119	44.0776	28.5208	18.1496	55.7452	-1.2964	38.892	10.3712	0	2.5928	85.5624	-28.5208	138.715	-123.158	29.8172	24.6316	12.964	-25.928	-64.82	6.482	-82.9696	38.892	146.493	-32.41	-137.418	55.7452	-67.641	-11.5956	58.6222	-29.6332	97.9184	-1.2884	27.0564	-52.8244	-41.2288
27	-55.7452	229.463	-89.4516	-199.646	-138.715	93.3408	15.5568	-89.4516	36.2992	-70.0056	7.7784	1.2964	35.0028	-6.482	-103.712	49.2632	28.5208	16.8532	58.338	0	40.1884	11.6676	7.7784	12.964	88.1552	-31.1136	142.604	-125.751	29.8172	23.3352	9.0748	-19.446	-64.82	6.482	-85.5624	38.892	152.975	-32.41	-150.382	58.338	-69.5736	-14.8166	58.6222	-36.7194	102.428	-0.6442	29.6332	-55.4012	-47.6708
28	-77.784	246.316	-90.748	-204.831	-142.604	95.9336	6.482	-97.23	37.5956	-70.0056	12.964	1.2964	45.374	9.0748	-107.601	55.7452	27.2244	16.8532	55.7452	-2.5928	37.5956	10.3712	14.2604	19.446	85.5624	-31.1136	145.197	-125.751	25.928	18.1496	9.0748	-19.446	-68.7092	12.964	-82.9696	37.5956	159.457	-36.2992	-156.864	71.302	-70.862	-17.3934	58.6222	-36.7194	105.649	-10.3072	34.7868	-54.757	-52.8244
29	-68.7092	250.205	-85.5624	-213.906	-146.493	93.3408	12.964	-111.49	33.7064	-67.4128	11.6676	5.1856	47.9668	10.3712	-111.49	58.338	28.5208	15.5568	57.0416	-10.3712	35.0028	12.964	14.2604	22.0388	80.3768	-29.8172	147.79	-125.751	25.928	7.7784	15.5568	-15.5568	-75.1912	15.5568	-85.5624	37.5956	159.457	-45.374	-160.754	71.302	-72.7946	-18.0376	58.6222	-40.5846	109.514	-10.9514	39.2962	-56.0454	-56.0454
30	-68.7092	252.798	-86.8588	-221.684	-146.493	88.1552	16.8532	-127.047	29.8172	-68.7092	10.3712	5.1856	50.5596	14.2604	-114.083	60.9308	28.5208	15.5568	59.6344	-11.6676	31.1136	15.5568	10.3712	25.928	62.2272	-32.41	149.086	-124.454	19.446	0	12.964	-15.5568	-72.5984	25.928	-86.8588	36.2992	163.346	-51.856	-160.754	84.266	-76.6598	-14.8166	58.6222	-43.8056	112.091	-10.9514	41.873	-57.978	-61.8432
31	-64.82	259.28	-88.1552	-232.056	-145.197	90.748	16.8532	-138.715	24.6316	-71.302	11.6676	3.8892	50.5596	24.6316	-116.676	66.1164	27.2244	16.8532	68.7092	-11.6676	29.8172	20.7424	10.3712	32.41	47.9668	-25.928	150.382	-121.862	12.964	-3.8892	22.0388	-15.5568	-72.5984	25.928	-88.1552	37.5956	176.31	-58.338	-160.754	84.266	-79.8808	-10.9514	54.757	-51.536	115.312	-12.2398	47.0266	-59.2664	-67.641
32	-68.7092	269.651	-86.8588	-242.427	-143.9	89.4516	16.8532	-147.79	27.2244	-72.5984	15.5568	2.5928	55.7452	27.2244	-121.862	68.7092	27.2244	16.8532	82.9696	-18.1496	28.5208	24.6316	10.3712	25.928	25.928	-25.928	149.086	-121.862	9.0748	-9.0748	22.0388	-19.446	-75.1912	25.928	-89.4516	36.2992	180.2	-64.82	-160.754	94.6372	-83.1018	-7.0862	50.8918	-51.536	117.244	-12.884	50.2476	-60.5548	-74.7272
33	-75.1912	276.133	-86.8588	-254.094	-143.9	89.4516	19.446	-145.197	29.8172	-70.0056	12.964	6.482	67.4128	23.3352	-129.64	71.302	27.2244	18.1496	94.6372	-33.7064	27.2244	25.928	3.8892	19.446	5.1856	-31.1136	147.79	-121.862	7.7784	-16.8532	22.0388	-19.446	-75.1912	38.892	-86.8588	36.2992	186.682	-75.1912	-164.643	101.119	-85.0344	-1.9326	47.6708	-51.536	118.533	-12.884	52.8244	-60.5548	-80.525
34	-84.266	299.468	-85.5624	-263.169	-146.493	92.0444	19.446	-146.493	28.5208	-72.5984	15.5568	-1.2964	79.0804	22.0388	-136.122	73.8948	25.928	18.1496	105.008	-42.7812	24.6316	27.2244	-6.482	9.0748	-14.2604	-31.1136	149.086	-123.158	7.7784	-20.7424	32.41	-25.928	-64.82	45.374	-84.266	36.2992	189.274	-81.6732	-164.643	105.008	-86.967	1.2884	39.9404	-51.536	121.11	-13.5282	56.0454	-59.9106	-86.3228
35	-92.0444	299.468	-79.0804	-270.948	-145.197	92.0444	10.3712	-146.493	27.2244	-75.1912	18.1496	-3.8892	92.0444	23.3352	-142.604	79.0804	27.2244	18.1496	114.083	-58.338	20.7424	25.928	-6.482	2.5928	-28.5208	-29.8172	147.79	-124.454	6.482	-25.928	28.5208	-32.41	-62.2272	45.374	-86.8588	36.2992	193.164	-92.0444	-164.643	111.49	-87.6112	4.5094	39.9404	-51.536	124.331	-14.8166	59.2664	-61.8432	-92.1206
36	-98.5264	305.95	-76.4876	-278.726	-141.308	94.6372	1.2964	-141.308	29.8172	-76.4876	19.446	2.5928	101.119	18.1496	-147.79	86.8588	28.5208	18.1496	128.344	-60.9308	15.5568	25.928	-6.482	-3.8892	-47.9668	-10.3712	146.493	-123.158	6.482	-31.1136	38.892	-42.7812	-58.338	51.856	-86.8588	35.0028	206.128	-101.119	-160.754	127.047	-88.8996	10.3072	36.7194	-51.536	128.196	-14.8166	64.42	-61.8432	-95.9858
37	-107.601	308.543	-73.8948	-290.394	-138.715	95.9336	-3.8892	-127.047	40.1884	-76.4876	29.8172	10.3712	115.38	12.964	-155.568	94.6372	25.928	19.446	141.308	-58.338	11.6676	23.3352	-6.482	-16.8532	-60.9308	7.7784	145.197	-124.454	3.8892	-32.41	42.7812	-45.374	-58.338	51.856	-86.8588	33.7064	206.128	-111.49	-164.643	130.936	-89.5438	14.1724	32.8542	-51.536	130.773	-16.7492	66.9968	-60.5548	-101.784
38	-107.601	318.914	-71.302	-300.765	-133.529	98.5264	-11.6676	-119.269	49.2632	-75.1912	36.2992	28.5208	127.047	20.7424	-163.346	98.5264	25.928	18.1496	155.568	-55.7452	9.0748	18.1496	-6.482	-23.3352	-66.1164	10.3712	138.715	-128.344	2.5928	-32.41	51.856	-42.7812	-64.82	51.856	-86.8588	33.7064	206.128	-114.083	-164.643	140.011	-90.8322	17.3934	28.989	-43.8056	133.349	-18.6818	68.9294	-60.5548	-106.293
39	-120.565	315.025	-64.82	-307.247	-128.344	103.712	-15.5568	-111.49	54.4488	-76.4876	29.8172	42.7812	137.418	20.7424	-165.939	99.8228	24.6316	18.1496	168.532	-53.1524	6.482	16.8532	-6.482	-25.928	-55.7452	36.2992	136.122	-128.344	1.2964	-33.7064	58.338	-49.2632	-64.82	58.338	-88.1552	32.41	215.202	-124.454	-164.643	146.493	-92.1206	19.9702	28.989	-40.5846	135.926	-19.326	72.1504	-65.7084	-111.447
40	-120.565	315.025	-62.2272	-313.729	-114.083	111.49	-28.5208	-101.119	62.2272	-80.3768	23.3352	53.1524	151.679	28.5208	-172.421	102.416	23.3352	19.446	180.2	-49.2632	5.1856	11.6676	3.8892	-29.8172	-40.1884	40.1884	132.233	-127.047	-1.2964	-31.1136	71.302	-45.374	-58.338	51.856	-90.748	29.8172	212.61	-133.529	-164.643	150.382	-95.3416	21.2586	28.989	-36.7194	138.503	-20.6144	74.7272	-68.2852	-117.889
41	-133.529	321.507	-60.9308	-321.507	-99.8228	120.565	-37.5956	-89.4516	72.5984	-86.8588	0	60.9308	164.643	28.5208	-181.496	108.898	22.0388	20.7424	194.46	-46.6704	6.482	6.482	3.8892	-36.2992	-24.6316	42.7812	129.64	-127.047	-3.8892	-28.5208	75.1912	-45.374	-55.7452	58.338	-94.6372	28.5208	206.128	-143.9	-160.754	150.382	-97.9184	23.8354	32.8542	-36.7194	140.436	-23.1912	76.6598	-71.5062	-123.686
42	-147.79	327.989	-51.856	-331.878	-85.5624	124.454	-53.1524	-86.8588	85.5624	-98.5264	-7.7784	72.5984	171.125	11.6676	-191.867	111.49	20.7424	20.7424	207.424	-45.374	5.1856	1.2964	3.8892	-29.8172	-14.2604	45.374	125.751	-128.344	-6.482	-27.2244	88.1552	-36.2992	-55.7452	51.856	-93.3408	29.8172	208.72	-150.382	-156.864	146.493	-99.2068	26.4122	28.989	-29.6332	141.724	-25.1238	77.9482	-74.7272	-129.484
43	-156.864	347.435	-45.374	-342.25	-75.1912	125.751	-62.2272	-89.4516	90.748	-107.601	-15.5568	84.266	168.532	7.7784	-200.942	110.194	19.446	19.446	221.684	-42.7812	5.1856	-2.5928	-6.482	-25.928	-3.8892	40.1884	120.565	-130.936	-9.0748	-23.3352	94.6372	-36.2992	-58.338	51.856	-92.0444	31.1136	206.128	-160.754	-150.382	146.493	-101.139	28.989	28.989	-25.768	142.368	-26.4122	78.5924	-81.1692	-133.349
44	-160.754	344.842	-42.7812	-352.621	-72.5984	127.047	-71.302	-94.6372	97.23	-111.49	-20.7424	95.9336	176.31	-6.482	-208.72	108.898	18.1496	19.446	235.945	-47.9668	5.1856	-6.482	-6.482	-25.928	5.1856	36.2992	114.083	-130.936	-12.964	-16.8532	101.119	-36.2992	-45.374	51.856	-93.3408	31.1136	208.72	-160.754	-141.308	140.011	-103.716	31.5658	28.989	-25.768	143.657	-28.3448	77.9482	-85.0344	-136.57
45	-167.236	338.36	-38.892	-364.288	-71.302	127.047	-80.3768	-98.5264	103.712	-114.083	-22.0388	105.008	187.978	-15.5568	-213.906	106.305	16.8532	19.446	251.502	-53.1524	9.0748	-11.6676	-6.482	-12.964	15.5568	38.892	108.898	-129.64	-16.8532	-9.0748	105.008	-32.41	-36.2992	58.338	-95.9336	29.8172	208.72	-167.236	-134.826	140.011	-105.649	32.8542	28.989	-25.768	144.945	-29.6332	79.8808	-89.5438	-138.503
46	-173.718	347.435	-32.41	-373.363	-71.302	128.344	-94.6372	-99.8228	106.305	-116.676	-29.8172	105.008	194.46	-22.0388	-220.388	103.712	18.1496	18.1496	265.762	-55.7452	10.3712	-12.964	-6.482	-6.482	24.6316	42.7812	106.305	-127.047	-18.1496	0	105.008	-22.0388	-32.41	62.2272	-97.23	29.8172	219.092	-180.2	-128.344	140.011	-106.293	33.4984	32.8542	-18.6818	146.878	-28.3448	80.525	-92.1206	-144.945
47	-182.792	347.435	-24.6316	-385.031	-68.7092	120.565	-106.305	-102.416	110.194	-117.972	-35.0028	105.008	200.942	-25.928	-225.574	102.416	18.1496	15.5568	277.43	-59.6344	10.3712	-14.2604	-6.482	-3.8892	29.8172	40.1884	103.712	-125.751	-18.1496	3.8892	111.49	-25.928	-32.41	62.2272	-105.008	28.5208	215.202	-182.792	-121.862	140.011	-107.581	32.21	28.989	-18.6818	148.81	-28.3448	79.8808	-97.2742	-151.387
48	-199.646	344.842	-15.5568	-394.106	-58.338	110.194	-116.676	-108.898	111.49	-123.158	-37.5956	114.083	199.646	-25.928	-234.648	101.119	16.8532	14.2604	290.394	-62.2272	11.6676	-15.5568	-9.0748	6.482	35.0028	42.7812	98.5264	-119.269	-20.7424	10.3712	111.49	-19.446	-25.928	62.2272	-103.712	29.8172	212.61	-186.682	-111.49	140.011	-108.226	36.0752	36.7194	-14.8166	151.387	-28.989	79.8808	-101.139	-156.541
49	-206.128	347.435	-7.7784	-405.773	-49.2632	101.119	-120.565	-114.083	114.083	-116.676	-36.2992	123.158	194.46	-19.446	-241.13	102.416	15.5568	12.964	300.765	-64.82	14.2604	-15.5568	-12.964	19.446	28.5208	63.5236	94.6372	-115.38	-23.3352	15.5568	111.49	-12.964	-29.8172	62.2272	-103.712	29.8172	208.72	-193.164	-101.119	137.418	-110.802	34.1426	32.8542	-3.8652	153.964	-28.3448	78.5924	-105.005	-160.406
50	-212.61	357.806	1.2964	-414.848	-41.4848	82.9696	-123.158	-124.454	119.269	-114.083	-29.8172	134.826	184.089	-11.6676	-245.02	102.416	12.964	11.6676	309.84	-66.1164	11.6676	-18.1496	-19.446	19.446	23.3352	70.0056	93.3408	-112.787	-24.6316	24.6316	111.49	-12.964	-16.8532	51.856	-97.23	32.41	199.646	-203.535	-92.0444	133.529	-115.956	26.4122	28.989	-3.8652	155.896	-28.989	77.9482	-106.937	-166.204
51	-225.574	355.214	7.7784	-422.626	-46.6704	62.2272	-129.64	-134.826	125.751	-110.194	-19.446	143.9	172.421	1.2964	-248.909	103.712	12.964	9.0748	324.1	-67.4128	10.3712	-19.446	-19.446	25.928	18.1496	72.5984	92.0444	-110.194	-24.6316	33.7064	114.083	-9.0748	-9.0748	51.856	-101.119	31.1136	189.274	-203.535	-88.1552	133.529	-123.042	19.326	28.989	-3.8652	158.473	-27.7006	77.304	-108.226	-172.001
52	-235.945	368.178	16.8532	-429.108	-50.5596	44.0776	-136.122	-143.9	134.826	-101.119	-12.964	147.79	162.05	11.6676	-252.798	105.008	11.6676	9.0748	338.36	-70.0056	9.0748	-23.3352	-22.0388	22.0388	11.6676	70.0056	92.0444	-107.601	-25.928	35.0028	111.49	-2.5928	-6.482	38.892	-106.305	28.5208	193.164	-203.535	-88.1552	124.454	-127.552	16.7492	28.989	0	161.694	-29.6332	77.304	-110.158	-176.511
53	-245.02	364.288	25.928	-435.59	-49.2632	41.4848	-142.604	-147.79	145.197	-92.0444	-11.6676	151.679	155.568	12.964	-255.391	106.305	10.3712	7.7784	352.621	-71.302	7.7784	-27.2244	-22.0388	25.928	5.1856	67.4128	92.0444	-106.305	-27.2244	36.2992	107.601	0	3.8892	49.2632	-114.083	27.2244	182.792	-203.535	-79.0804	124.454	-132.061	17.3934	32.8542	7.0862	162.983	-31.5658	75.3714	-111.447	-180.376
54	-257.984	368.178	37.5956	-440.776	-40.1884	38.892	-150.382	-152.975	152.975	-86.8588	-14.2604	152.975	150.382	18.1496	-261.873	107.601	6.482	7.7784	362.992	-67.4128	7.7784	-29.8172	-22.0388	22.0388	-11.6676	60.9308	89.4516	-102.416	-24.6316	37.5956	101.119	3.8892	10.3712	49.2632	-117.972	24.6316	180.2	-212.61	-68.7092	124.454	-134.638	16.7492	32.8542	10.9514	164.915	-32.8542	72.1504	-114.023	-183.597
55	-261.873	370.77	46.6704	-448.554	-36.2992	38.892	-159.457	-159.457	158.161	-84.266	-19.446	151.679	142.604	23.3352	-268.355	107.601	3.8892	6.482	370.77	-63.5236	6.482	-33.7064	-28.5208	22.0388	-25.928	51.856	88.1552	-98.5264	-22.0388	36.2992	94.6372	12.964	12.964	51.856	-123.158	24.6316	182.792	-219.092	-62.2272	124.454	-136.57	14.8166	32.8542	10.9514	167.492	-34.1426	68.9294	-115.956	-186.818
56	-272.244	374.66	55.7452	-453.74	-33.7064	41.4848	-171.125	-156.864	160.754	-79.0804	-25.928	159.457	133.529	32.41	-272.244	107.601	2.5928	3.8892	381.142	-54.4488	1.2964	-41.4848	-28.5208	19.446	-37.5956	42.7812	88.1552	-90.748	-22.0388	36.2992	92.0444	10.3712	16.8532	49.2632	-125.751	24.6316	176.31	-229.463	-62.2272	124.454	-138.503	13.5282	36.7194	14.1724	171.357	-33.4984	66.3526	-117.244	-192.616
57	-281.319	368.178	66.1164	-458.926	-31.1136	40.1884	-178.903	-155.568	164.643	-75.1912	-28.5208	164.643	121.862	41.4848	-276.133	105.008	1.2964	2.5928	390.216	-49.2632	0	-45.374	-28.5208	12.964	-49.2632	29.8172	84.266	-81.6732	-23.3352	36.2992	92.0444	12.964	19.446	49.2632	-127.047	25.928	176.31	-225.574	-55.7452	124.454	-141.08	13.5282	39.9404	14.1724	174.578	-34.1426	65.0642	-119.177	-197.769
58	-285.208	364.288	76.4876	-465.408	-28.5208	41.4848	-190.571	-162.05	172.421	-72.5984	-27.2244	167.236	112.787	49.2632	-282.615	98.5264	1.2964	0	396.698	-46.6704	-1.2964	-47.9668	-35.0028	6.482	-57.0416	7.7784	84.266	-70.0056	-24.6316	33.7064	92.0444	10.3712	19.446	38.892	-128.344	25.928	173.718	-229.463	-45.374	124.454	-143.657	12.884	36.7194	21.9028	177.799	-34.7868	62.4874	-121.754	-202.279
59	-298.172	361.696	92.0444	-468	-27.2244	41.4848	-200.942	-167.236	176.31	-63.5236	-25.928	167.236	105.008	59.6344	-287.801	94.6372	1.2964	-1.2964	407.07	-46.6704	-1.2964	-51.856	-41.4848	2.5928	-60.9308	-12.964	84.266	-55.7452	-24.6316	29.8172	94.6372	12.964	29.8172	38.892	-133.529	29.8172	173.718	-232.056	-45.374	117.972	-144.945	10.9514	43.8056	21.9028	180.376	-34.1426	60.5548	-124.975	-205.5
60	-304.654	357.806	105.008	-466.704	-23.3352	42.7812	-210.017	-171.125	176.31	-58.338	-23.3352	167.236	93.3408	66.1164	-292.986	94.6372	0	-1.2964	421.33	-46.6704	0	-54.4488	-41.4848	0	-64.82	-25.928	82.9696	-40.1884	-35.0028	33.7064	92.0444	10.3712	23.3352	35.0028	-134.826	36.2992	169.828	-242.427	-42.7812	117.972	-147.522	10.3072	50.8918	14.1724	182.309	-36.0752	59.9106	-126.907	-208.077
61	-313.729	361.696	116.676	-465.408	-19.446	45.374	-216.499	-169.828	173.718	-54.4488	-18.1496	165.939	84.266	76.4876	-296.876	92.0444	0	-3.8892	434.294	-46.6704	2.5928	-57.0416	-51.856	0	-70.0056	-33.7064	80.3768	-24.6316	-42.7812	32.41	101.119	3.8892	23.3352	35.0028	-134.826	44.0776	169.828	-238.538	-42.7812	117.972	-150.099	10.9514	54.757	21.9028	186.174	-34.1426	58.6222	-128.196	-212.586
62	-317.618	361.696	127.047	-465.408	-14.2604	47.9668	-224.277	-165.939	168.532	-51.856	-14.2604	165.939	77.784	84.266	-300.765	90.748	-1.2964	-3.8892	448.554	-49.2632	3.8892	-63.5236	-58.338	0	-71.302	-36.2992	80.3768	-14.2604	-45.374	31.1136	101.119	0	25.928	35.0028	-136.122	49.2632	159.457	-238.538	-36.2992	114.083	-152.031	9.663	58.6222	14.1724	188.751	-36.0752	57.3338	-129.484	-215.807
63	-327.989	355.214	138.715	-464.111	-5.1856	46.6704	-232.056	-164.643	162.05	-54.4488	-11.6676	165.939	75.1912	85.5624	-304.654	89.4516	-2.5928	-6.482	460.222	-49.2632	5.1856	-68.7092	-68.7092	0	-71.302	-35.0028	77.784	-7.7784	-47.9668	28.5208	105.008	-2.5928	32.41	28.5208	-136.122	54.4488	165.939	-242.427	-25.928	111.49	-153.964	10.9514	65.7084	14.1724	190.683	-35.431	55.4012	-132.061	-217.74
64	-327.989	355.214	151.679	-465.408	1.2964	42.7812	-239.834	-159.457	156.864	-57.0416	-10.3712	167.236	71.302	90.748	-308.543	89.4516	-3.8892	-7.7784	469.297	-53.1524	7.7784	-72.5984	-75.1912	2.5928	-70.0056	-19.446	77.784	-3.8892	-47.9668	28.5208	101.119	0	32.41	28.5208	-134.826	57.0416	165.939	-242.427	-23.3352	107.601	-157.185	14.1724	69.5736	14.1724	192.616	-38.0078	55.4012	-133.349	-219.672
65	-337.064	351.324	165.939	-466.704	6.482	41.4848	-247.612	-154.272	151.679	-59.6344	-10.3712	168.532	67.4128	89.4516	-313.729	89.4516	-5.1856	-6.482	482.261	-51.856	12.964	-75.1912	-88.1552	2.5928	-64.82	-18.1496	77.784	1.2964	-46.6704	28.5208	107.601	0	25.928	28.5208	-133.529	58.338	159.457	-232.056	-12.964	107.601	-160.406	19.9702	65.7084	14.1724	194.548	-37.3636	52.8244	-135.282	-224.826
66	-343.546	347.435	177.607	-468	16.8532	37.5956	-251.502	-146.493	143.9	-59.6344	-11.6676	172.421	60.9308	88.1552	-317.618	88.1552	-5.1856	-7.7784	497.818	-50.5596	14.2604	-77.784	-97.23	0	-59.6344	-12.964	76.4876	6.482	-45.374	29.8172	114.083	-9.0748	25.928	28.5208	-132.233	59.6344	159.457	-232.056	-10.3712	107.601	-162.338	26.4122	69.5736	21.9028	197.125	-36.0752	49.6034	-137.215	-228.691
67	-356.51	334.471	193.164	-469.297	18.1496	33.7064	-257.984	-138.715	136.122	-68.7092	-14.2604	171.125	51.856	86.8588	-321.507	86.8588	-5.1856	-7.7784	509.485	-57.0416	15.5568	-80.3768	-110.194	12.964	-53.1524	-6.482	64.82	14.2604	-44.0776	31.1136	114.083	-9.0748	32.41	28.5208	-134.826	58.338	163.346	-232.056	-3.8892	105.008	-165.559	33.4984	65.7084	25.1238	199.058	-38.652	45.7382	-140.436	-231.912
68	-366.881	340.953	207.424	-468	22.0388	33.7064	-267.058	-134.826	125.751	-75.1912	-15.5568	169.828	37.5956	86.8588	-324.1	84.266	-5.1856	-6.482	514.671	-59.6344	18.1496	-84.266	-114.083	12.964	-44.0776	5.1856	60.9308	24.6316	-42.7812	33.7064	120.565	-2.5928	36.2992	28.5208	-136.122	55.7452	165.939	-232.056	0	101.119	-166.848	37.3636	69.5736	32.8542	200.99	-36.7194	45.094	-142.368	-236.421
69	-375.956	334.471	217.795	-468	23.3352	31.1136	-276.133	-130.936	116.676	-76.4876	-9.0748	165.939	31.1136	77.784	-326.693	84.266	-6.482	-6.482	521.153	-60.9308	16.8532	-89.4516	-127.047	12.964	-33.7064	12.964	55.7452	29.8172	-40.1884	36.2992	124.454	-9.0748	38.892	38.892	-136.122	57.0416	173.718	-212.61	12.964	94.6372	-168.78	39.9404	69.5736	32.8542	202.923	-39.2962	41.873	-144.945	-240.287
70	-383.734	338.36	228.166	-470.593	24.6316	32.41	-281.319	-128.344	111.49	-79.0804	3.8892	167.236	22.0388	79.0804	-327.989	84.266	-7.7784	-3.8892	527.635	-60.9308	18.1496	-94.6372	-137.418	12.964	-22.0388	22.0388	51.856	33.7064	-37.5956	40.1884	127.047	-2.5928	36.2992	38.892	-134.826	57.0416	180.2	-210.017	12.964	94.6372	-170.713	43.1614	72.7946	32.8542	204.856	-36.7194	38.0078	-146.878	-245.44
71	-390.216	331.878	241.13	-470.593	24.6316	32.41	-290.394	-121.862	106.305	-82.9696	14.2604	168.532	25.928	79.0804	-327.989	84.266	-7.7784	-2.5928	534.117	-64.82	18.1496	-97.23	-146.493	12.964	-9.0748	28.5208	50.5596	35.0028	-32.41	42.7812	130.936	0	42.7812	49.2632	-134.826	57.0416	180.2	-210.017	19.446	94.6372	-171.357	47.6708	76.6598	32.8542	207.432	-38.652	34.7868	-149.454	-248.017
72	-396.698	327.989	254.094	-473.186	23.3352	32.41	-296.876	-117.972	103.712	-85.5624	22.0388	168.532	29.8172	79.0804	-327.989	82.9696	-7.7784	-2.5928	538.006	-70.0056	18.1496	-101.119	-156.864	19.446	5.1856	31.1136	47.9668	33.7064	-28.5208	51.856	133.529	0	53.1524	62.2272	-134.826	57.0416	186.682	-203.535	25.928	90.748	-172.001	51.536	76.6598	32.8542	210.009	-38.0078	32.21	-152.031	-250.594
73	-409.662	321.507	267.058	-473.186	22.0388	31.1136	-307.247	-116.676	102.416	-84.266	27.2244	175.014	29.8172	76.4876	-324.1	81.6732	-9.0748	-1.2964	547.081	-75.1912	20.7424	-108.898	-165.939	19.446	11.6676	41.4848	45.374	32.41	-24.6316	59.6344	133.529	3.8892	53.1524	71.302	-134.826	55.7452	189.274	-203.535	32.41	90.748	-174.578	56.0454	76.6598	39.9404	211.942	-36.0752	30.2774	-152.675	-254.459
74	-418.737	321.507	277.43	-470.593	22.0388	29.8172	-316.322	-116.676	103.712	-81.6732	33.7064	182.792	29.8172	66.1164	-321.507	82.9696	-10.3712	0	562.638	-84.266	22.0388	-112.787	-176.31	12.964	18.1496	49.2632	45.374	33.7064	-20.7424	64.82	143.9	10.3712	53.1524	75.1912	-138.715	54.4488	193.164	-195.756	32.41	90.748	-177.799	59.2664	80.525	39.9404	213.874	-36.7194	27.0564	-154.608	-257.036
75	-425.219	318.914	289.097	-466.704	22.0388	28.5208	-326.693	-117.972	105.008	-80.3768	35.0028	187.978	22.0388	71.302	-316.322	72.5984	-10.3712	0	575.602	-93.3408	25.928	-116.676	-182.792	12.964	22.0388	62.2272	45.374	33.7064	-15.5568	72.5984	146.493	6.482	53.1524	81.6732	-140.011	51.856	189.274	-193.164	42.7812	90.748	-179.088	62.4874	80.525	39.9404	216.451	-34.1426	25.1238	-155.896	-260.257
76	-425.219	312.432	302.061	-460.222	22.0388	28.5208	-334.471	-120.565	107.601	-81.6732	33.7064	191.867	20.7424	71.302	-313.729	79.0804	-11.6676	1.2964	583.38	-105.008	28.5208	-117.972	-189.274	19.446	25.928	73.8948	45.374	36.2992	-11.6676	76.4876	146.493	23.3352	53.1524	84.266	-142.604	51.856	202.238	-193.164	45.374	90.748	-180.376	66.3526	80.525	36.0752	219.028	-34.1426	23.8354	-158.473	-264.122
77	-429.108	302.061	315.025	-456.333	22.0388	28.5208	-340.953	-121.862	110.194	-81.6732	28.5208	195.756	18.1496	76.4876	-313.729	75.1912	-10.3712	1.2964	592.455	-115.38	31.1136	-123.158	-199.646	25.928	28.5208	82.9696	45.374	36.2992	-11.6676	80.3768	146.493	23.3352	49.2632	84.266	-138.715	54.4488	206.128	-189.274	49.2632	90.748	-182.953	73.4388	83.746	39.9404	221.605	-33.4984	23.1912	-161.694	-264.766
78	-435.59	299.468	326.693	-457.629	24.6316	25.928	-348.732	-124.454	111.49	-81.6732	25.928	202.238	1.2964	123.158	-309.84	75.1912	-11.6676	1.2964	600.233	-125.751	35.0028	-127.047	-206.128	28.5208	29.8172	88.1552	45.374	36.2992	-9.0748	80.3768	146.493	33.7064	49.2632	84.266	-140.011	54.4488	206.128	-186.682	55.7452	90.748	-184.241	77.304	91.4764	36.0752	224.826	-33.4984	21.9028	-164.271	-269.276
79	-429.108	291.69	339.657	-455.036	25.928	23.3352	-351.324	-130.936	112.787	-82.9696	20.7424	207.424	-11.6676	106.305	-303.358	79.0804	-11.6676	1.2964	609.308	-136.122	38.892	-136.122	-212.61	28.5208	29.8172	90.748	46.6704	36.2992	-10.3712	80.3768	150.382	36.2992	19.446	84.266	-143.9	53.1524	219.092	-182.792	64.82	90.748	-186.174	79.2366	91.4764	36.0752	227.403	-33.4984	20.6144	-167.492	-270.564
80	-429.108	289.097	353.917	-452.444	28.5208	20.7424	-352.621	-138.715	114.083	-85.5624	18.1496	215.202	-11.6676	106.305	-303.358	88.1552	-12.964	1.2964	611.901	-145.197	44.0776	-145.197	-225.574	32.41	28.5208	94.6372	49.2632	35.0028	-12.964	84.266	154.272	36.2992	19.446	84.266	-145.197	53.1524	219.092	-180.2	68.7092	90.748	-187.462	81.8134	94.6974	36.0752	228.691	-33.4984	18.0376	-170.713	-273.141
81	-418.737	291.69	365.585	-445.962	32.41	18.1496	-348.732	-142.604	115.38	-86.8588	22.0388	221.684	-11.6676	106.305	-296.876	85.5624	-12.964	2.5928	615.79	-146.493	46.6704	-149.086	-234.648	42.7812	32.41	95.9336	50.5596	32.41	-15.5568	89.4516	154.272	46.6704	12.964	84.266	-141.308	54.4488	221.684	-169.828	72.5984	90.748	-190.683	83.746	98.5626	36.0752	229.335	-31.5658	15.4608	-172.001	-276.362
82	-422.626	289.097	374.66	-440.776	38.892	14.2604	-344.842	-143.9	117.972	-89.4516	27.2244	224.277	-12.964	106.305	-296.876	88.1552	-11.6676	1.2964	614.494	-145.197	47.9668	-150.382	-245.02	38.892	33.7064	95.9336	53.1524	31.1136	-16.8532	95.9336	154.272	59.6344	12.964	84.266	-138.715	55.7452	225.574	-169.828	79.0804	90.748	-192.616	85.0344	105.649	36.0752	231.268	-30.2774	11.5956	-173.934	-278.294
83	-422.626	282.615	387.624	-434.294	54.4488	5.1856	-339.657	-151.679	120.565	-92.0444	42.7812	215.202	-18.1496	107.601	-294.283	92.0444	-11.6676	0	619.679	-147.79	50.5596	-152.975	-251.502	42.7812	31.1136	94.6372	57.0416	29.8172	-18.1496	99.8228	156.864	59.6344	3.8892	94.6372	-140.011	55.7452	219.092	-167.236	72.5984	90.748	-194.548	86.3228	102.428	36.0752	233.2	-27.7006	7.7304	-175.222	-278.939
84	-418.737	282.615	399.291	-423.923	60.9308	-1.2964	-339.657	-159.457	120.565	-98.5264	45.374	211.313	-19.446	106.305	-303.358	117.972	-12.964	0	618.383	-149.086	54.4488	-155.568	-261.873	42.7812	32.41	90.748	59.6344	28.5208	-25.928	106.305	150.382	59.6344	6.482	114.083	-142.604	54.4488	219.092	-167.236	85.5624	90.748	-195.837	86.967	102.428	36.0752	235.777	-27.0564	3.8652	-176.511	-280.871
85	-418.737	272.244	410.959	-418.737	64.82	-3.8892	-338.36	-167.236	123.158	-99.8228	45.374	203.535	-20.7424	106.305	-296.876	98.5264	-12.964	0	615.79	-146.493	54.4488	-159.457	-261.873	58.338	31.1136	88.1552	62.2272	28.5208	-35.0028	107.601	160.754	66.1164	0	120.565	-145.197	53.1524	225.574	-163.346	94.6372	88.1552	-197.125	86.967	113.379	36.0752	237.71	-25.1238	-0.6442	-175.222	-284.736
86	-412.255	259.28	422.626	-414.848	70.0056	-5.1856	-338.36	-172.421	124.454	-95.9336	41.4848	199.646	-24.6316	107.601	-280.022	94.6372	-11.6676	0	619.679	-141.308	55.7452	-160.754	-270.948	58.338	32.41	90.748	67.4128	28.5208	-38.892	103.712	154.272	72.5984	0	127.047	-150.382	49.2632	229.463	-167.236	98.5264	88.1552	-198.414	87.6112	102.428	39.9404	239.642	-21.2586	-3.8652	-175.867	-286.669
87	-409.662	250.205	434.294	-407.07	70.0056	-9.0748	-340.953	-181.496	125.751	-93.3408	36.2992	198.349	-33.7064	117.972	-270.948	88.1552	-12.964	0	619.679	-130.936	57.0416	-163.346	-287.801	62.2272	35.0028	89.4516	72.5984	29.8172	-41.4848	98.5264	146.493	81.6732	-12.964	130.936	-155.568	46.6704	229.463	-167.236	105.008	88.1552	-199.702	87.6112	113.379	36.0752	241.575	-19.9702	-7.0862	-175.222	-288.602
88	-396.698	243.723	445.962	-397.995	71.302	-10.3712	-338.36	-186.682	125.751	-90.748	33.7064	200.942	-40.1884	129.64	-280.022	85.5624	-14.2604	-1.2964	617.086	-127.047	60.9308	-164.643	-294.283	62.2272	36.2992	92.0444	79.0804	33.7064	-42.7812	93.3408	140.011	79.0804	-23.3352	130.936	-168.532	42.7812	235.945	-163.346	101.119	81.6732	-201.635	88.2554	98.5626	36.0752	243.508	-18.6818	-9.663	-177.155	-295.044
89	-390.216	239.834	457.629	-387.624	70.0056	-10.3712	-334.471	-190.571	124.454	-89.4516	35.0028	210.017	-49.2632	141.308	-273.54	81.6732	-11.6676	-2.5928	609.308	-116.676	63.5236	-167.236	-303.358	62.2272	38.892	92.0444	81.6732	35.0028	-42.7812	90.748	143.9	75.1912	-19.446	130.936	-180.2	42.7812	235.945	-163.346	111.49	77.784	-204.211	88.8996	102.428	32.8542	244.796	-16.105	-12.2398	-175.867	-297.62
90	-386.327	237.241	473.186	-379.845	71.302	-10.3712	-329.286	-195.756	124.454	-90.748	31.1136	224.277	-58.338	150.382	-283.912	75.1912	-10.3712	-5.1856	598.937	-108.898	64.82	-171.125	-317.618	55.7452	42.7812	90.748	85.5624	36.2992	-40.1884	85.5624	154.272	81.6732	-36.2992	130.936	-185.385	45.374	235.945	-163.346	111.49	71.302	-206.788	90.188	105.649	32.8542	246.729	-14.8166	-14.8166	-175.867	-299.553
91	-373.363	239.834	484.854	-370.77	72.5984	-12.964	-322.804	-199.646	123.158	-90.748	33.7064	230.759	-66.1164	155.568	-283.912	75.1912	-10.3712	-6.482	588.566	-99.8228	67.4128	-172.421	-326.693	55.7452	45.374	90.748	86.8588	35.0028	-35.0028	80.3768	137.418	88.1552	-29.8172	130.936	-187.978	46.6704	235.945	-167.236	114.083	71.302	-209.365	92.1206	102.428	32.8542	246.729	-10.9514	-17.3934	-177.155	-302.13
92	-360.399	237.241	496.521	-362.992	73.8948	-12.964	-318.914	-203.535	120.565	-94.6372	33.7064	238.538	-75.1912	159.457	-296.876	79.0804	-9.0748	-9.0748	576.898	-94.6372	71.302	-175.014	-330.582	62.2272	47.9668	92.0444	92.0444	37.5956	-25.928	73.8948	127.047	88.1552	-25.928	130.936	-193.164	49.2632	235.945	-163.346	124.454	64.82	-211.942	94.0532	87.6112	25.1238	248.017	-9.663	-19.9702	-177.799	-304.707
93	-360.399	233.352	508.189	-355.214	72.5984	-12.964	-317.618	-210.017	117.972	-98.5264	35.0028	242.427	-81.6732	163.346	-316.322	86.8588	-6.482	-11.6676	569.12	-94.6372	73.8948	-178.903	-343.546	71.302	49.2632	90.748	94.6372	38.892	-12.964	67.4128	133.529	92.0444	-32.41	130.936	-194.46	53.1524	255.391	-163.346	124.454	64.82	-212.586	94.6974	87.6112	25.1238	248.661	-7.7304	-22.547	-177.799	-305.995
94	-350.028	226.87	521.153	-346.139	75.1912	-15.5568	-313.729	-213.906	114.083	-101.119	40.1884	246.316	-84.266	172.421	-331.878	92.0444	-3.8892	-15.5568	561.341	-92.0444	77.784	-180.2	-352.621	75.1912	49.2632	89.4516	98.5264	38.892	-7.7784	63.5236	127.047	95.9336	-36.2992	130.936	-197.053	55.7452	264.466	-167.236	120.565	49.2632	-213.23	95.3416	98.5626	25.1238	249.305	-6.442	-24.4796	-179.732	-306.639
95	-340.953	216.499	530.228	-337.064	77.784	-18.1496	-312.432	-219.092	112.787	-99.8228	45.374	246.316	-85.5624	175.014	-340.953	99.8228	6.482	-16.8532	554.859	-92.0444	84.266	-181.496	-352.621	84.266	51.856	86.8588	101.119	40.1884	-5.1856	54.4488	124.454	92.0444	-36.2992	117.972	-197.053	58.338	251.502	-169.828	128.344	49.2632	-213.874	95.3416	94.6974	25.1238	251.238	-5.1536	-28.3448	-181.664	-309.86
96	-334.471	222.981	543.192	-329.286	82.9696	-23.3352	-311.136	-224.277	112.787	-98.5264	47.9668	246.316	-92.0444	184.089	-346.139	106.305	9.0748	-19.446	548.377	-90.748	85.5624	-186.682	-356.51	90.748	51.856	84.266	103.712	41.4848	2.5928	49.2632	117.972	88.1552	-38.892	117.972	-195.756	62.2272	257.984	-173.718	117.972	49.2632	-214.519	96.63	102.428	32.8542	251.882	-3.221	-30.9216	-182.309	-315.658
97	-321.507	213.906	553.563	-318.914	85.5624	-27.2244	-307.247	-229.463	112.787	-99.8228	51.856	245.02	-97.23	189.274	-350.028	106.305	11.6676	-24.6316	541.895	-89.4516	89.4516	-187.978	-372.067	94.6372	54.4488	80.3768	106.305	44.0776	7.7784	42.7812	120.565	95.9336	-36.2992	98.5264	-193.164	66.1164	248.909	-169.828	117.972	35.0028	-214.519	96.63	105.649	32.8542	253.815	-2.5768	-33.4984	-182.953	-322.744
98	-311.136	210.017	560.045	-308.543	97.23	-35.0028	-300.765	-232.056	111.49	-102.416	54.4488	243.723	-105.008	193.164	-356.51	105.008	12.964	-27.2244	534.117	-82.9696	93.3408	-190.571	-372.067	101.119	55.7452	76.4876	108.898	45.374	15.5568	37.5956	114.083	88.1552	-38.892	98.5264	-191.867	71.302	255.391	-173.718	117.972	35.0028	-214.519	96.63	105.649	32.8542	255.103	-1.2884	-35.431	-183.597	-329.186
99	-304.654	207.424	566.527	-300.765	103.712	-36.2992	-292.986	-230.759	110.194	-106.305	42.7812	239.834	-112.787	197.053	-361.696	108.898	14.2604	-29.8172	526.338	-72.5984	97.23	-191.867	-372.067	101.119	60.9308	73.8948	112.787	47.9668	22.0388	31.1136	114.083	92.0444	-29.8172	94.6372	-189.274	75.1912	257.984	-167.236	117.972	25.928	-213.23	95.3416	113.379	32.8542	256.392	-1.2884	-37.3636	-184.241	-337.561
100	-294.283	194.46	575.602	-290.394	111.49	-38.892	-285.208	-230.759	106.305	-111.49	35.0028	243.723	-117.972	202.238	-368.178	111.49	15.5568	-31.1136	518.56	-64.82	101.119	-194.46	-372.067	101.119	62.2272	71.302	115.38	50.5596	28.5208	27.2244	111.49	95.9336	-42.7812	94.6372	-185.385	79.0804	261.873	-173.718	114.083	19.446	-212.586	93.409	113.379	36.0752	257.68	-0.6442	-39.9404	-184.885	-344.003
[truncated: 89 more columns]
