# Supplementary material for: Spatiotemporal dynamics of PIEZO1 localization controls keratinocyte migration during wound healing
Source: eLife. 2021 Sep 27;10:e65415. doi: 10.7554/eLife.65415 (PMC8577841; doi:10.7554/eLife.65415)
Supplement: Figure 2—source data 1. — (Sheets 1, 2) X,Y coordinates used to plot cell trajectories derived from tracking single (Sheet 1) control and (Sheet 2) conditional knockout (cKO) keratinocytes plotted in Figure 2B. (Sheet 3) Average mean squared displacement (MSD) analysis of ControlcKO and Piezo1-cKO keratinocytes plotted in Figure 2C. (Sheet 4) MSD for individual cells used to create averages found in Sheet 3. (Sheet 5) Average direction autocorrelation measurement of Piezo1-cKO and ControlcKO keratinocytes plotted as a function of time interval in Figure 2D. (Sheet 6) Quantitation of the average instantaneous speed from individual Piezo1-cKO keratinocytes and Piezo1-GoF keratinocytes relative to the respective control cells plotted in Figure 2E. [file elife-65415-fig2-data1.xlsx]

## Sheet: 2B - Con(cKO) Trajecto
Plotted Trajectories for Figure 2B and Supp Fig 3. Relative X and Relative Y are seen plotted for each trajectory
	Cell 1		Cell 2		Cell 3		Cell 4		Cell 5		Cell 6		Cell 7		Cell 8		Cell 9		Cell 10		Cell 11		Cell 12		Cell 13		Cell 14		Cell 15		Cell 16		Cell 17		Cell 18		Cell 19		Cell 20		Cell 21		Cell 22		Cell 23		Cell 24		Cell 25
Frame	Relative X	Relative Y	Relative X	Relative Y	Relative X	Relative Y	Relative X	Relative Y	Relative X	Relative Y	Relative X	Relative Y	Relative X	Relative Y	Relative X	Relative Y	Relative X	Relative Y	Relative X	Relative Y	Relative X	Relative Y	Relative X	Relative Y	Relative X	Relative Y	Relative X	Relative Y	Relative X	Relative Y	Relative X	Relative Y	Relative X	Relative Y	Relative X	Relative Y	Relative X	Relative Y	Relative X	Relative Y	Relative X	Relative Y	Relative X	Relative Y	Relative X	Relative Y	Relative X	Relative Y	Relative X
1			0	0	0	0	0	0	0	0	0	0	0	0	0	0	0	0	0	0	0	0	0	0	0	0	0	0	0	0	0	0	0	0	0	0	0	0	0	0	0	0	0	0	0	0	0	0	0
2	0	0	0	2.5928	0	0	0	0	3.8892	-2.5928	1.2964	-1.2964	-5.1856	3.8892	-3.8892	1.2964	14.2604	-9.0748	0	-2.5928	7.7784	-7.7784	2.5928	0	-2.5928	2.5928	-12.964	-2.5928	-3.8892	5.1856	2.5928	0	-2.5928	-2.5928	0	0	0	0	1.2964	9.0748	-15.5568	25.928	1.2964	0	-1.2964	2.5928	0	3.8892	0
3	0	0	0	2.5928	0	0	1.2964	2.5928	9.0748	-3.8892	1.2964	-1.2964	-7.7784	5.1856	-6.482	0	9.0748	-9.0748	0	-10.3712	7.7784	-7.7784	2.5928	-3.8892	-2.5928	2.5928	-7.7784	0	-6.482	5.1856	2.5928	0	-2.5928	-5.1856	0	0	3.8892	-2.5928	1.2964	7.7784	-22.0388	33.7064	0	0	-1.2964	2.5928	0	3.8892	-1.2964
4	-3.8892	6.482	-1.2964	2.5928	0	0	1.2964	2.5928	6.482	-3.8892	0	-1.2964	-7.7784	5.1856	-6.482	2.5928	3.8892	-3.8892	-3.8892	-14.2604	7.7784	-7.7784	2.5928	-6.482	-1.2964	2.5928	-6.482	-2.5928	-23.3352	5.1856	-1.2964	0	1.2964	1.2964	0	9.0748	6.482	-2.5928	2.5928	7.7784	-20.7424	37.5956	1.2964	0	-2.5928	2.5928	1.2964	3.8892	0
5	-3.8892	7.7784	-1.2964	2.5928	0	0	1.2964	5.1856	0	-12.964	0	-1.2964	-6.482	3.8892	-6.482	3.8892	2.5928	-2.5928	-3.8892	-15.5568	7.7784	-3.8892	0	-6.482	-1.2964	2.5928	-9.0748	-2.5928	-20.7424	9.0748	-2.5928	0	1.2964	7.7784	1.2964	9.0748	7.7784	2.5928	5.1856	9.0748	-14.2604	37.5956	1.2964	0	-3.8892	2.5928	1.2964	3.8892	0
6	0	9.0748	-2.5928	5.1856	2.5928	0	1.2964	5.1856	-1.2964	-16.8532	0	-1.2964	-7.7784	6.482	-11.6676	6.482	6.482	-3.8892	-10.3712	-11.6676	7.7784	-3.8892	-5.1856	-6.482	-1.2964	2.5928	-14.2604	-2.5928	-12.964	10.3712	-2.5928	0	2.5928	14.2604	3.8892	10.3712	9.0748	9.0748	5.1856	12.964	-9.0748	40.1884	3.8892	0	-3.8892	1.2964	2.5928	9.0748	0
7	5.1856	14.2604	-2.5928	3.8892	2.5928	0	3.8892	10.3712	-1.2964	-19.446	0	-2.5928	-7.7784	6.482	-12.964	9.0748	5.1856	-2.5928	-10.3712	-6.482	15.5568	-7.7784	-5.1856	-5.1856	-5.1856	2.5928	-20.7424	0	-6.482	10.3712	-2.5928	5.1856	5.1856	14.2604	3.8892	9.0748	9.0748	12.964	11.6676	6.482	27.2244	27.2244	2.5928	-1.2964	-6.482	1.2964	3.8892	10.3712	-1.2964
8	9.0748	20.7424	-2.5928	3.8892	5.1856	0	3.8892	10.3712	2.5928	-23.3352	1.2964	-2.5928	-7.7784	6.482	-14.2604	6.482	3.8892	-3.8892	-6.482	-6.482	15.5568	-7.7784	-5.1856	-5.1856	-7.7784	2.5928	-20.7424	2.5928	-5.1856	20.7424	-2.5928	7.7784	11.6676	16.8532	3.8892	9.0748	6.482	16.8532	20.7424	9.0748	24.6316	40.1884	5.1856	-1.2964	-6.482	-2.5928	6.482	9.0748	-1.2964
9	9.0748	23.3352	-2.5928	2.5928	5.1856	3.8892	5.1856	11.6676	3.8892	-23.3352	2.5928	-3.8892	-6.482	5.1856	-16.8532	6.482	1.2964	-2.5928	-2.5928	-7.7784	15.5568	-9.0748	2.5928	-5.1856	-10.3712	-3.8892	-19.446	12.964	-5.1856	22.0388	-5.1856	9.0748	12.964	18.1496	3.8892	9.0748	-3.8892	20.7424	29.8172	11.6676	24.6316	58.338	5.1856	-1.2964	-9.0748	-6.482	3.8892	14.2604	-2.5928
10	9.0748	23.3352	-3.8892	2.5928	6.482	6.482	11.6676	11.6676	6.482	-23.3352	2.5928	-5.1856	-5.1856	3.8892	-19.446	9.0748	-1.2964	-2.5928	-2.5928	-7.7784	15.5568	-11.6676	6.482	-5.1856	-10.3712	-3.8892	-19.446	18.1496	-16.8532	16.8532	-11.6676	7.7784	15.5568	22.0388	6.482	9.0748	-10.3712	24.6316	37.5956	12.964	23.3352	63.5236	0	1.2964	-11.6676	-6.482	0	16.8532	0
11	9.0748	24.6316	-3.8892	3.8892	9.0748	6.482	11.6676	11.6676	6.482	-23.3352	6.482	-6.482	-6.482	6.482	-25.928	10.3712	-2.5928	-3.8892	-2.5928	-7.7784	15.5568	-11.6676	6.482	-3.8892	-10.3712	-3.8892	-19.446	18.1496	-20.7424	15.5568	-16.8532	7.7784	15.5568	24.6316	11.6676	1.2964	-14.2604	28.5208	46.6704	14.2604	6.482	72.5984	1.2964	2.5928	-11.6676	-11.6676	-1.2964	22.0388	1.2964
12	9.0748	24.6316	-3.8892	2.5928	9.0748	6.482	12.964	11.6676	6.482	-23.3352	7.7784	-7.7784	-6.482	5.1856	-22.0388	7.7784	-2.5928	-3.8892	-2.5928	-7.7784	18.1496	-12.964	5.1856	0	-12.964	-3.8892	-19.446	18.1496	-20.7424	15.5568	-16.8532	7.7784	15.5568	31.1136	19.446	-2.5928	-15.5568	29.8172	55.7452	9.0748	-5.1856	66.1164	5.1856	-2.5928	-12.964	-15.5568	1.2964	19.446	2.5928
13	14.2604	25.928	-3.8892	2.5928	9.0748	6.482	16.8532	12.964	6.482	-23.3352	9.0748	-9.0748	-6.482	3.8892	-24.6316	7.7784	-5.1856	-3.8892	-3.8892	-6.482	18.1496	-12.964	2.5928	0	-15.5568	-3.8892	-19.446	19.446	-20.7424	20.7424	-16.8532	9.0748	15.5568	31.1136	29.8172	-2.5928	-19.446	37.5956	66.1164	5.1856	-9.0748	64.82	9.0748	-6.482	-12.964	-15.5568	1.2964	19.446	2.5928
14	14.2604	28.5208	-3.8892	2.5928	9.0748	3.8892	23.3352	15.5568	5.1856	-29.8172	9.0748	-9.0748	-6.482	2.5928	-32.41	9.0748	-7.7784	-3.8892	-3.8892	-6.482	19.446	-12.964	2.5928	0	-15.5568	-7.7784	-16.8532	19.446	-23.3352	20.7424	-16.8532	9.0748	15.5568	36.2992	35.0028	0	-23.3352	41.4848	72.5984	1.2964	-7.7784	63.5236	18.1496	-16.8532	-12.964	-15.5568	1.2964	18.1496	3.8892
15	14.2604	28.5208	-3.8892	1.2964	9.0748	3.8892	25.928	18.1496	5.1856	-29.8172	11.6676	-9.0748	-9.0748	3.8892	-29.8172	5.1856	-10.3712	-6.482	0	3.8892	19.446	-12.964	0	3.8892	-15.5568	-7.7784	-12.964	23.3352	-28.5208	22.0388	-16.8532	9.0748	12.964	38.892	35.0028	0	-27.2244	44.0776	80.3768	-2.5928	-6.482	63.5236	32.41	-33.7064	-14.2604	-15.5568	0	19.446	2.5928
16	14.2604	31.1136	-3.8892	2.5928	9.0748	3.8892	27.2244	18.1496	5.1856	-27.2244	15.5568	-7.7784	-9.0748	1.2964	-36.2992	7.7784	-11.6676	-5.1856	1.2964	3.8892	19.446	-12.964	0	3.8892	-16.8532	-1.2964	-9.0748	24.6316	-31.1136	22.0388	-14.2604	9.0748	11.6676	41.4848	41.4848	-2.5928	-31.1136	49.2632	86.8588	-2.5928	-3.8892	66.1164	33.7064	-36.2992	-23.3352	-35.0028	0	22.0388	2.5928
17	14.2604	31.1136	-2.5928	0	11.6676	3.8892	27.2244	18.1496	9.0748	-27.2244	16.8532	-7.7784	-11.6676	-1.2964	-40.1884	7.7784	-14.2604	-6.482	1.2964	3.8892	20.7424	-12.964	0	3.8892	-16.8532	2.5928	-2.5928	25.928	-35.0028	22.0388	-14.2604	5.1856	10.3712	46.6704	42.7812	-2.5928	-33.7064	53.1524	90.748	-5.1856	0	63.5236	42.7812	-41.4848	-24.6316	-38.892	1.2964	23.3352	1.2964
18	14.2604	31.1136	0	-3.8892	11.6676	3.8892	28.5208	18.1496	9.0748	-27.2244	18.1496	-7.7784	-16.8532	-1.2964	-42.7812	6.482	-16.8532	-7.7784	1.2964	3.8892	23.3352	-12.964	1.2964	2.5928	-16.8532	6.482	0	19.446	-38.892	22.0388	-14.2604	5.1856	3.8892	49.2632	46.6704	-6.482	-35.0028	53.1524	97.23	-3.8892	0	55.7452	28.5208	-27.2244	-24.6316	-37.5956	3.8892	22.0388	1.2964
19	14.2604	20.7424	2.5928	-10.3712	11.6676	6.482	28.5208	14.2604	9.0748	-27.2244	19.446	-7.7784	-22.0388	-2.5928	-44.0776	5.1856	-16.8532	-11.6676	0	3.8892	25.928	-12.964	0	2.5928	-16.8532	6.482	3.8892	12.964	-54.4488	20.7424	-14.2604	5.1856	-3.8892	53.1524	47.9668	-12.964	-38.892	59.6344	103.712	-3.8892	2.5928	50.5596	32.41	-27.2244	-24.6316	-46.6704	5.1856	22.0388	2.5928
20	12.964	32.41	6.482	-15.5568	11.6676	7.7784	33.7064	11.6676	9.0748	-27.2244	20.7424	-9.0748	-27.2244	-2.5928	-41.4848	0	-20.7424	-10.3712	0	5.1856	27.2244	-12.964	-6.482	2.5928	-15.5568	7.7784	3.8892	9.0748	-54.4488	20.7424	-11.6676	5.1856	-3.8892	53.1524	47.9668	-14.2604	-42.7812	63.5236	108.898	-2.5928	-1.2964	37.5956	25.928	-19.446	-23.3352	-46.6704	5.1856	22.0388	2.5928
21	11.6676	38.892	7.7784	-18.1496	12.964	6.482	35.0028	11.6676	9.0748	-27.2244	23.3352	-7.7784	-31.1136	-2.5928	-46.6704	1.2964	-22.0388	-9.0748	0	6.482	27.2244	-15.5568	-7.7784	3.8892	-19.446	7.7784	5.1856	5.1856	-55.7452	20.7424	-10.3712	5.1856	1.2964	53.1524	62.2272	-18.1496	-44.0776	63.5236	112.787	0	-33.7064	32.41	23.3352	-14.2604	-22.0388	-45.374	5.1856	23.3352	2.5928
22	11.6676	38.892	10.3712	-22.0388	12.964	6.482	38.892	10.3712	6.482	-27.2244	24.6316	-7.7784	-31.1136	-2.5928	-49.2632	2.5928	-24.6316	-9.0748	0	6.482	27.2244	-15.5568	-7.7784	3.8892	-23.3352	7.7784	12.964	2.5928	-57.0416	14.2604	-11.6676	5.1856	15.5568	50.5596	59.6344	-25.928	-46.6704	64.82	115.38	3.8892	-50.5596	32.41	22.0388	-14.2604	-22.0388	-44.0776	3.8892	24.6316	2.5928
23	11.6676	38.892	14.2604	-24.6316	14.2604	6.482	40.1884	7.7784	6.482	-27.2244	25.928	-7.7784	-31.1136	-2.5928	-50.5596	2.5928	-25.928	-9.0748	0	6.482	24.6316	-11.6676	-7.7784	3.8892	-23.3352	7.7784	12.964	2.5928	-55.7452	15.5568	-18.1496	9.0748	15.5568	50.5596	50.5596	-22.0388	-51.856	68.7092	119.269	3.8892	-58.338	49.2632	24.6316	-16.8532	-22.0388	-42.7812	3.8892	24.6316	2.5928
24	11.6676	38.892	16.8532	-25.928	14.2604	7.7784	40.1884	7.7784	6.482	-27.2244	25.928	-6.482	-29.8172	-1.2964	-54.4488	3.8892	-28.5208	-7.7784	-2.5928	6.482	31.1136	-9.0748	-6.482	5.1856	-31.1136	6.482	9.0748	-3.8892	-46.6704	15.5568	-18.1496	9.0748	15.5568	50.5596	51.856	-22.0388	-64.82	72.5984	123.158	3.8892	-59.6344	55.7452	35.0028	-25.928	-20.7424	-40.1884	5.1856	23.3352	2.5928
25	11.6676	38.892	18.1496	-28.5208	14.2604	9.0748	41.4848	7.7784	6.482	-27.2244	27.2244	-5.1856	-29.8172	0	-51.856	1.2964	-29.8172	-7.7784	-2.5928	6.482	31.1136	-11.6676	-6.482	5.1856	-32.41	6.482	9.0748	-3.8892	-45.374	15.5568	-18.1496	7.7784	11.6676	49.2632	54.4488	-20.7424	-66.1164	72.5984	128.344	1.2964	-59.6344	63.5236	38.892	-28.5208	-19.446	-38.892	5.1856	24.6316	1.2964
26	12.964	40.1884	19.446	-28.5208	14.2604	10.3712	42.7812	7.7784	6.482	-29.8172	29.8172	-5.1856	-33.7064	2.5928	-54.4488	-1.2964	-29.8172	-5.1856	-2.5928	6.482	33.7064	-12.964	-7.7784	5.1856	-25.928	15.5568	10.3712	-14.2604	-45.374	12.964	-18.1496	7.7784	11.6676	49.2632	64.82	-12.964	-66.1164	72.5984	132.233	0	-57.0416	70.0056	35.0028	-25.928	-18.1496	-38.892	3.8892	27.2244	1.2964
27	14.2604	40.1884	19.446	-29.8172	12.964	10.3712	41.4848	7.7784	9.0748	-29.8172	29.8172	-3.8892	-28.5208	3.8892	-55.7452	-1.2964	-31.1136	-10.3712	-2.5928	6.482	33.7064	-12.964	-2.5928	9.0748	-24.6316	16.8532	12.964	-20.7424	-47.9668	9.0748	-18.1496	7.7784	7.7784	49.2632	71.302	-10.3712	-67.4128	73.8948	136.122	1.2964	-46.6704	73.8948	32.41	-24.6316	-15.5568	-38.892	2.5928	28.5208	1.2964
28	14.2604	40.1884	19.446	-29.8172	12.964	10.3712	41.4848	10.3712	10.3712	-29.8172	31.1136	-3.8892	-28.5208	5.1856	-57.0416	-2.5928	-32.41	-10.3712	-2.5928	6.482	33.7064	-12.964	-5.1856	5.1856	-20.7424	16.8532	15.5568	-27.2244	-53.1524	10.3712	-18.1496	7.7784	7.7784	49.2632	80.3768	-10.3712	-67.4128	73.8948	140.011	2.5928	-40.1884	77.784	31.1136	-24.6316	-23.3352	-47.9668	3.8892	27.2244	2.5928
29	25.928	42.7812	19.446	-31.1136	12.964	10.3712	42.7812	10.3712	10.3712	-29.8172	31.1136	-1.2964	-31.1136	6.482	-58.338	-2.5928	-35.0028	-11.6676	1.2964	6.482	33.7064	-12.964	-7.7784	7.7784	-19.446	16.8532	5.1856	-23.3352	-55.7452	7.7784	-18.1496	7.7784	9.0748	47.9668	86.8588	-7.7784	-72.5984	80.3768	142.604	2.5928	-35.0028	72.5984	28.5208	-23.3352	-27.2244	-45.374	2.5928	28.5208	2.5928
30	25.928	44.0776	19.446	-31.1136	15.5568	10.3712	45.374	10.3712	10.3712	-29.8172	31.1136	0	-31.1136	5.1856	-60.9308	-1.2964	-36.2992	-10.3712	3.8892	6.482	32.41	-9.0748	-7.7784	7.7784	-19.446	16.8532	0	-29.8172	-55.7452	5.1856	-16.8532	0	10.3712	46.6704	89.4516	-5.1856	-72.5984	88.1552	145.197	1.2964	-20.7424	71.302	24.6316	-20.7424	-28.5208	-45.374	3.8892	28.5208	1.2964
31	24.6316	47.9668	16.8532	-28.5208	20.7424	10.3712	46.6704	10.3712	10.3712	-29.8172	32.41	1.2964	-31.1136	5.1856	-64.82	3.8892	-37.5956	-7.7784	1.2964	9.0748	31.1136	-9.0748	-7.7784	7.7784	-18.1496	24.6316	-1.2964	-29.8172	-55.7452	0	-16.8532	0	10.3712	42.7812	82.9696	5.1856	-73.8948	98.5264	147.79	5.1856	-15.5568	70.0056	22.0388	-19.446	-25.928	-46.6704	2.5928	31.1136	2.5928
32	10.3712	57.0416	18.1496	-29.8172	22.0388	7.7784	47.9668	10.3712	10.3712	-29.8172	33.7064	1.2964	-35.0028	2.5928	-63.5236	-5.1856	-38.892	-9.0748	1.2964	9.0748	31.1136	-7.7784	-7.7784	1.2964	-15.5568	24.6316	-1.2964	-32.41	-55.7452	-2.5928	-16.8532	0	10.3712	42.7812	82.9696	5.1856	-40.1884	103.712	151.679	5.1856	-15.5568	68.7092	15.5568	-14.2604	-25.928	-44.0776	2.5928	31.1136	2.5928
33	-3.8892	75.1912	18.1496	-28.5208	23.3352	7.7784	50.5596	11.6676	11.6676	-29.8172	33.7064	2.5928	-38.892	0	-66.1164	-5.1856	-41.4848	-9.0748	1.2964	10.3712	31.1136	-3.8892	-7.7784	1.2964	-15.5568	24.6316	-3.8892	-28.5208	-60.9308	-5.1856	-14.2604	9.0748	10.3712	42.7812	90.748	5.1856	-50.5596	105.008	156.864	9.0748	-16.8532	66.1164	18.1496	-16.8532	-25.928	-41.4848	3.8892	32.41	2.5928
34	-9.0748	85.5624	18.1496	-28.5208	23.3352	6.482	54.4488	11.6676	11.6676	-29.8172	35.0028	2.5928	-54.4488	0	-68.7092	-5.1856	-44.0776	-9.0748	-10.3712	18.1496	31.1136	-3.8892	-10.3712	2.5928	-15.5568	23.3352	-6.482	-23.3352	-62.2272	-6.482	-16.8532	10.3712	16.8532	45.374	92.0444	5.1856	-58.338	99.8228	159.457	12.964	-19.446	66.1164	-1.2964	0	-25.928	-40.1884	3.8892	32.41	2.5928
35	-9.0748	93.3408	18.1496	-28.5208	25.928	6.482	55.7452	11.6676	12.964	-29.8172	33.7064	3.8892	-47.9668	0	-70.0056	-6.482	-46.6704	-9.0748	-10.3712	18.1496	31.1136	-3.8892	-10.3712	2.5928	-15.5568	22.0388	-19.446	-22.0388	-62.2272	-9.0748	-16.8532	10.3712	16.8532	41.4848	92.0444	7.7784	-63.5236	98.5264	164.643	15.5568	-24.6316	67.4128	19.446	-6.482	-24.6316	-37.5956	3.8892	33.7064	2.5928
36	-32.41	99.8228	18.1496	-27.2244	25.928	6.482	55.7452	11.6676	6.482	-29.8172	36.2992	5.1856	-47.9668	-1.2964	-70.0056	-9.0748	-47.9668	-11.6676	-6.482	16.8532	31.1136	-3.8892	-6.482	5.1856	-12.964	23.3352	-22.0388	-14.2604	-60.9308	-9.0748	-16.8532	10.3712	16.8532	41.4848	92.0444	7.7784	-75.1912	92.0444	168.532	18.1496	-29.8172	72.5984	14.2604	-2.5928	-23.3352	-38.892	5.1856	33.7064	1.2964
37	-33.7064	102.416	19.446	-27.2244	29.8172	6.482	53.1524	15.5568	6.482	-27.2244	36.2992	5.1856	-46.6704	-3.8892	-86.8588	5.1856	-49.2632	-12.964	-6.482	14.2604	31.1136	-2.5928	-6.482	5.1856	-11.6676	27.2244	-28.5208	-12.964	-55.7452	-9.0748	-16.8532	11.6676	24.6316	38.892	89.4516	9.0748	-81.6732	90.748	172.421	15.5568	-37.5956	80.3768	11.6676	0	-24.6316	-38.892	2.5928	33.7064	0
38	-33.7064	103.712	22.0388	-28.5208	33.7064	1.2964	53.1524	18.1496	6.482	-27.2244	36.2992	6.482	-45.374	-7.7784	-88.1552	2.5928	-50.5596	-12.964	-2.5928	10.3712	33.7064	-2.5928	-6.482	5.1856	-11.6676	31.1136	-38.892	-22.0388	-53.1524	-9.0748	-16.8532	11.6676	24.6316	33.7064	88.1552	9.0748	-88.1552	90.748	173.718	18.1496	-49.2632	82.9696	11.6676	1.2964	-23.3352	-40.1884	2.5928	35.0028	1.2964
39	-38.892	108.898	23.3352	-29.8172	35.0028	0	53.1524	20.7424	6.482	-27.2244	36.2992	6.482	-46.6704	-10.3712	-88.1552	2.5928	-54.4488	-12.964	-2.5928	9.0748	33.7064	-2.5928	-6.482	2.5928	-10.3712	29.8172	-42.7812	-27.2244	-46.6704	-6.482	-18.1496	11.6676	25.928	33.7064	88.1552	9.0748	-90.748	89.4516	175.014	18.1496	-57.0416	84.266	10.3712	3.8892	-20.7424	-38.892	1.2964	35.0028	1.2964
40	-40.1884	108.898	23.3352	-29.8172	36.2992	0	54.4488	22.0388	5.1856	-27.2244	35.0028	7.7784	-49.2632	-7.7784	-88.1552	-2.5928	-55.7452	-14.2604	-2.5928	9.0748	33.7064	-2.5928	-2.5928	2.5928	-9.0748	29.8172	-45.374	-25.928	-45.374	-5.1856	-19.446	11.6676	27.2244	33.7064	88.1552	9.0748	-98.5264	89.4516	176.31	18.1496	-62.2272	84.266	10.3712	5.1856	-19.446	-40.1884	-2.5928	36.2992	2.5928
41	-44.0776	115.38	24.6316	-28.5208	36.2992	0	54.4488	22.0388	5.1856	-27.2244	37.5956	7.7784	-51.856	-6.482	-90.748	0	-54.4488	-15.5568	-2.5928	9.0748	33.7064	-3.8892	0	2.5928	-7.7784	29.8172	-47.9668	-23.3352	-44.0776	-2.5928	-19.446	11.6676	29.8172	32.41	88.1552	9.0748	-102.416	89.4516	176.31	19.446	-63.5236	85.5624	3.8892	10.3712	-18.1496	-38.892	-3.8892	36.2992	2.5928
42	-46.6704	116.676	25.928	-29.8172	36.2992	0	50.5596	27.2244	5.1856	-27.2244	37.5956	9.0748	-53.1524	-7.7784	-90.748	-2.5928	-55.7452	-16.8532	-3.8892	9.0748	33.7064	-3.8892	1.2964	2.5928	-7.7784	29.8172	-54.4488	-20.7424	-44.0776	-1.2964	-20.7424	11.6676	37.5956	29.8172	86.8588	14.2604	-107.601	88.1552	176.31	20.7424	-62.2272	85.5624	-5.1856	15.5568	-15.5568	-37.5956	-1.2964	32.41	1.2964
43	-49.2632	124.454	28.5208	-29.8172	38.892	0	45.374	32.41	5.1856	-29.8172	36.2992	10.3712	-55.7452	-9.0748	-90.748	-2.5928	-58.338	-16.8532	-6.482	9.0748	32.41	-2.5928	1.2964	2.5928	-9.0748	27.2244	-70.0056	-20.7424	-44.0776	0	-22.0388	10.3712	41.4848	29.8172	86.8588	14.2604	-115.38	85.5624	176.31	22.0388	-59.6344	86.8588	-7.7784	18.1496	-12.964	-38.892	-2.5928	31.1136	1.2964
44	-49.2632	130.936	31.1136	-31.1136	40.1884	0	41.4848	37.5956	5.1856	-29.8172	36.2992	10.3712	-59.6344	-14.2604	-93.3408	-2.5928	-58.338	-18.1496	-7.7784	9.0748	32.41	-2.5928	-6.482	5.1856	-12.964	27.2244	-76.4876	-33.7064	-44.0776	-2.5928	-22.0388	7.7784	41.4848	28.5208	86.8588	10.3712	-115.38	85.5624	175.014	23.3352	-55.7452	85.5624	10.3712	9.0748	-10.3712	-37.5956	-2.5928	31.1136	1.2964
45	-49.2632	133.529	31.1136	-31.1136	41.4848	0	45.374	50.5596	6.482	-29.8172	37.5956	10.3712	-60.9308	-15.5568	-94.6372	-2.5928	-59.6344	-18.1496	-10.3712	9.0748	32.41	-2.5928	-6.482	5.1856	-19.446	27.2244	-76.4876	-38.892	-40.1884	-5.1856	-22.0388	3.8892	35.0028	22.0388	86.8588	10.3712	-121.862	81.6732	175.014	19.446	-51.856	82.9696	7.7784	12.964	7.7784	-49.2632	-2.5928	29.8172	1.2964
46	-44.0776	136.122	32.41	-29.8172	45.374	0	45.374	51.856	6.482	-29.8172	41.4848	10.3712	-62.2272	-19.446	-95.9336	-2.5928	-59.6344	-15.5568	-10.3712	9.0748	31.1136	-2.5928	-7.7784	5.1856	-24.6316	27.2244	-75.1912	-38.892	-38.892	-5.1856	-22.0388	2.5928	33.7064	20.7424	97.23	18.1496	-123.158	80.3768	176.31	18.1496	-49.2632	84.266	6.482	19.446	16.8532	-51.856	-2.5928	31.1136	0
47	-31.1136	134.826	33.7064	-29.8172	46.6704	0	45.374	55.7452	6.482	-27.2244	40.1884	11.6676	-63.5236	-20.7424	-97.23	-2.5928	-60.9308	-15.5568	-10.3712	9.0748	28.5208	-2.5928	-9.0748	3.8892	-25.928	27.2244	-73.8948	-41.4848	-36.2992	-5.1856	-19.446	2.5928	33.7064	20.7424	98.5264	18.1496	-129.64	73.8948	177.607	15.5568	-45.374	77.784	1.2964	23.3352	20.7424	-54.4488	-3.8892	32.41	0
48	-33.7064	128.344	35.0028	-31.1136	47.9668	0	46.6704	49.2632	6.482	-25.928	40.1884	12.964	-64.82	-19.446	-95.9336	-1.2964	-60.9308	-16.8532	-10.3712	9.0748	28.5208	-2.5928	-9.0748	5.1856	-25.928	27.2244	-75.1912	-46.6704	-35.0028	-7.7784	-3.8892	3.8892	42.7812	25.928	99.8228	14.2604	-132.233	72.5984	180.2	12.964	-55.7452	47.9668	-25.928	64.82	18.1496	-55.7452	-5.1856	33.7064	0
49	-40.1884	128.344	35.0028	-31.1136	47.9668	0	49.2632	47.9668	6.482	-25.928	38.892	14.2604	-67.4128	-22.0388	-97.23	-2.5928	-60.9308	-16.8532	-11.6676	9.0748	28.5208	-2.5928	-10.3712	5.1856	-27.2244	28.5208	-75.1912	-47.9668	-35.0028	-9.0748	-2.5928	3.8892	44.0776	24.6316	102.416	14.2604	-136.122	70.0056	182.792	10.3712	-46.6704	93.3408	-41.4848	86.8588	20.7424	-57.0416	-6.482	36.2992	1.2964
50	-41.4848	129.64	35.0028	-31.1136	47.9668	0	54.4488	45.374	6.482	-25.928	38.892	14.2604	-71.302	-27.2244	-97.23	-1.2964	-60.9308	-18.1496	-16.8532	9.0748	28.5208	-2.5928	-12.964	5.1856	-27.2244	31.1136	-76.4876	-49.2632	-35.0028	-12.964	-2.5928	3.8892	53.1524	29.8172	103.712	24.6316	-147.79	67.4128	185.385	6.482	-53.1524	107.601	-35.0028	85.5624	24.6316	-55.7452	-6.482	38.892	1.2964
51	-41.4848	129.64	37.5956	-31.1136	47.9668	0	57.0416	42.7812	6.482	-25.928	40.1884	15.5568	-75.1912	-28.5208	-98.5264	-1.2964	-62.2272	-16.8532	-19.446	9.0748	31.1136	-2.5928	-14.2604	5.1856	-31.1136	36.2992	-79.0804	-51.856	-35.0028	-14.2604	-11.6676	5.1856	60.9308	37.5956	103.712	25.928	-150.382	67.4128	185.385	5.1856	-68.7092	106.305	-32.41	81.6732	31.1136	-58.338	-7.7784	44.0776	1.2964
52	-46.6704	130.936	37.5956	-31.1136	53.1524	-3.8892	60.9308	41.4848	6.482	-25.928	38.892	15.5568	-79.0804	-32.41	-99.8228	-1.2964	-63.5236	-15.5568	-19.446	9.0748	33.7064	-3.8892	-14.2604	3.8892	-32.41	37.5956	-82.9696	-54.4488	-32.41	-9.0748	-12.964	5.1856	71.302	45.374	103.712	24.6316	-152.975	67.4128	182.792	1.2964	-79.0804	97.23	-37.5956	80.3768	32.41	-57.0416	-11.6676	46.6704	1.2964
53	-47.9668	130.936	36.2992	-31.1136	54.4488	-3.8892	60.9308	40.1884	6.482	-25.928	40.1884	15.5568	-81.6732	-24.6316	-99.8228	-1.2964	-60.9308	-16.8532	-19.446	6.482	35.0028	-3.8892	-14.2604	1.2964	-33.7064	37.5956	-93.3408	-58.338	-28.5208	-7.7784	-12.964	5.1856	71.302	46.6704	105.008	25.928	-152.975	72.5984	176.31	-2.5928	-79.0804	86.8588	-41.4848	80.3768	33.7064	-55.7452	-12.964	49.2632	1.2964
54	-47.9668	127.047	36.2992	-31.1136	53.1524	-3.8892	63.5236	36.2992	6.482	-25.928	37.5956	15.5568	-81.6732	-24.6316	-99.8228	-2.5928	-63.5236	-14.2604	-20.7424	5.1856	35.0028	-3.8892	-14.2604	-2.5928	-35.0028	37.5956	-119.269	-64.82	-27.2244	-6.482	-12.964	5.1856	71.302	46.6704	107.601	27.2244	-147.79	77.784	173.718	-5.1856	-66.1164	80.3768	-44.0776	79.0804	37.5956	-51.856	-12.964	50.5596	2.5928
55	-47.9668	125.751	36.2992	-31.1136	53.1524	-2.5928	64.82	35.0028	6.482	-25.928	37.5956	15.5568	-82.9696	-23.3352	-101.119	-2.5928	-64.82	-14.2604	-20.7424	5.1856	35.0028	-3.8892	-15.5568	-2.5928	-36.2992	37.5956	-128.344	-64.82	-29.8172	-6.482	-12.964	5.1856	64.82	31.1136	110.194	31.1136	-140.011	80.3768	168.532	0	-55.7452	84.266	-44.0776	77.784	41.4848	-46.6704	-12.964	53.1524	2.5928
56	-42.7812	125.751	36.2992	-29.8172	53.1524	-2.5928	68.7092	32.41	6.482	-25.928	40.1884	16.8532	-84.266	-22.0388	-102.416	-3.8892	-64.82	-16.8532	-20.7424	5.1856	35.0028	-3.8892	-16.8532	-2.5928	-37.5956	42.7812	-130.936	-51.856	-35.0028	-9.0748	-12.964	5.1856	64.82	31.1136	111.49	33.7064	-143.9	75.1912	165.939	2.5928	-49.2632	99.8228	-44.0776	76.4876	41.4848	-40.1884	-15.5568	57.0416	2.5928
57	-38.892	125.751	35.0028	-29.8172	53.1524	-2.5928	70.0056	29.8172	14.2604	-22.0388	38.892	18.1496	-85.5624	-20.7424	-103.712	-3.8892	-64.82	-16.8532	-20.7424	5.1856	33.7064	-2.5928	-16.8532	-3.8892	-37.5956	44.0776	-127.047	-45.374	-35.0028	-12.964	-12.964	5.1856	60.9308	31.1136	111.49	37.5956	-143.9	70.0056	163.346	5.1856	-54.4488	111.49	-45.374	73.8948	38.892	-36.2992	-15.5568	60.9308	3.8892
58	-38.892	121.862	35.0028	-28.5208	53.1524	-2.5928	72.5984	28.5208	6.482	-22.0388	38.892	18.1496	-85.5624	-19.446	-102.416	-1.2964	-64.82	-16.8532	-20.7424	5.1856	32.41	-2.5928	-19.446	-5.1856	-41.4848	37.5956	-130.936	-38.892	-31.1136	-14.2604	-12.964	5.1856	60.9308	37.5956	112.787	37.5956	-142.604	68.7092	159.457	6.482	-72.5984	108.898	-41.4848	79.0804	36.2992	-33.7064	-16.8532	63.5236	3.8892
59	-38.892	117.972	35.0028	-28.5208	53.1524	-2.5928	63.5236	36.2992	6.482	-18.1496	37.5956	19.446	-85.5624	-20.7424	-102.416	0	-64.82	-16.8532	-19.446	5.1856	32.41	0	-29.8172	-3.8892	-41.4848	29.8172	-138.715	-33.7064	-28.5208	-14.2604	-12.964	5.1856	68.7092	46.6704	120.565	38.892	-140.011	57.0416	154.272	6.482	-71.302	98.5264	-46.6704	80.3768	37.5956	-33.7064	-18.1496	64.82	3.8892
60	-41.4848	117.972	36.2992	-27.2244	53.1524	0	68.7092	37.5956	9.0748	-18.1496	37.5956	19.446	-86.8588	-22.0388	-102.416	-1.2964	-64.82	-16.8532	-15.5568	5.1856	32.41	3.8892	-31.1136	-2.5928	-41.4848	29.8172	-147.79	-32.41	-27.2244	-14.2604	-18.1496	3.8892	72.5984	49.2632	121.862	38.892	-138.715	57.0416	150.382	7.7784	-64.82	90.748	-49.2632	80.3768	40.1884	-32.41	-19.446	64.82	3.8892
61	-41.4848	117.972	38.892	-25.928	53.1524	0	68.7092	37.5956	9.0748	-18.1496	38.892	20.7424	-86.8588	-24.6316	-103.712	-3.8892	-64.82	-19.446	-12.964	5.1856	36.2992	6.482	-32.41	-2.5928	-36.2992	35.0028	-151.679	-32.41	-27.2244	-10.3712	-19.446	1.2964	72.5984	47.9668	121.862	41.4848	-152.975	42.7812	147.79	10.3712	-55.7452	85.5624	-40.1884	75.1912	40.1884	-32.41	-18.1496	66.1164	5.1856
62	-41.4848	117.972	40.1884	-25.928	53.1524	0	76.4876	37.5956	9.0748	-18.1496	37.5956	22.0388	-86.8588	-24.6316	-105.008	-5.1856	-66.1164	-20.7424	-12.964	5.1856	36.2992	6.482	-29.8172	-2.5928	-33.7064	37.5956	-150.382	-32.41	-27.2244	-10.3712	-19.446	1.2964	72.5984	45.374	123.158	46.6704	-155.568	42.7812	145.197	11.6676	-50.5596	85.5624	-32.41	76.4876	41.4848	-32.41	-18.1496	66.1164	5.1856
63	-46.6704	117.972	41.4848	-25.928	50.5596	-3.8892	77.784	37.5956	9.0748	-18.1496	37.5956	22.0388	-88.1552	-23.3352	-105.008	-3.8892	-67.4128	-19.446	-15.5568	5.1856	36.2992	6.482	-27.2244	-3.8892	-32.41	38.892	-143.9	-33.7064	-28.5208	-12.964	-19.446	1.2964	75.1912	42.7812	123.158	46.6704	-167.236	44.0776	140.011	10.3712	-45.374	86.8588	-28.5208	80.3768	41.4848	-32.41	-19.446	68.7092	6.482
64	-40.1884	115.38	38.892	-24.6316	49.2632	-5.1856	77.784	35.0028	9.0748	-19.446	36.2992	22.0388	-88.1552	-23.3352	-105.008	-5.1856	-67.4128	-20.7424	-15.5568	5.1856	36.2992	6.482	-27.2244	-2.5928	-32.41	44.0776	-141.308	-33.7064	-28.5208	-14.2604	-18.1496	3.8892	81.6732	50.5596	134.826	62.2272	-168.532	41.4848	137.418	10.3712	-45.374	90.748	-22.0388	82.9696	42.7812	-32.41	-19.446	70.0056	7.7784
65	-36.2992	111.49	38.892	-23.3352	47.9668	-6.482	76.4876	32.41	10.3712	-19.446	35.0028	23.3352	-88.1552	-23.3352	-105.008	-5.1856	-67.4128	-20.7424	-16.8532	5.1856	36.2992	7.7784	-27.2244	1.2964	-32.41	46.6704	-138.715	-32.41	-28.5208	-15.5568	-18.1496	5.1856	85.5624	57.0416	134.826	62.2272	-159.457	35.0028	133.529	9.0748	-51.856	92.0444	-22.0388	89.4516	42.7812	-33.7064	-18.1496	70.0056	9.0748
66	-36.2992	108.898	41.4848	-22.0388	45.374	-9.0748	76.4876	32.41	10.3712	-19.446	33.7064	27.2244	-88.1552	-24.6316	-106.305	-7.7784	-66.1164	-24.6316	-23.3352	3.8892	36.2992	7.7784	-31.1136	1.2964	-35.0028	46.6704	-150.382	-38.892	-28.5208	-16.8532	-18.1496	7.7784	85.5624	57.0416	134.826	50.5596	-146.493	40.1884	132.233	6.482	-58.338	94.6372	-22.0388	89.4516	44.0776	-36.2992	-18.1496	71.302	9.0748
67	-36.2992	111.49	42.7812	-22.0388	38.892	-6.482	76.4876	32.41	9.0748	-22.0388	33.7064	27.2244	-88.1552	-23.3352	-106.305	-9.0748	-66.1164	-24.6316	-24.6316	3.8892	36.2992	7.7784	-31.1136	1.2964	-35.0028	46.6704	-141.308	-47.9668	-29.8172	-18.1496	-18.1496	9.0748	82.9696	57.0416	134.826	50.5596	-145.197	41.4848	132.233	5.1856	-58.338	94.6372	-25.928	93.3408	40.1884	-40.1884	-18.1496	72.5984	9.0748
68	-35.0028	116.676	44.0776	-22.0388	36.2992	-5.1856	76.4876	33.7064	6.482	-22.0388	35.0028	25.928	-89.4516	-22.0388	-107.601	-9.0748	-64.82	-25.928	-24.6316	3.8892	33.7064	10.3712	-32.41	1.2964	-36.2992	45.374	-117.972	-40.1884	-31.1136	-18.1496	-12.964	10.3712	84.266	60.9308	140.011	53.1524	-140.011	44.0776	129.64	5.1856	-64.82	92.0444	-31.1136	99.8228	35.0028	-41.4848	-18.1496	73.8948	10.3712
69	-32.41	116.676	46.6704	-22.0388	35.0028	-3.8892	79.0804	33.7064	6.482	-22.0388	35.0028	25.928	-89.4516	-22.0388	-106.305	-10.3712	-66.1164	-25.928	-19.446	3.8892	32.41	10.3712	-33.7064	1.2964	-32.41	45.374	-111.49	-35.0028	-31.1136	-18.1496	-5.1856	11.6676	82.9696	62.2272	143.9	54.4488	-137.418	44.0776	128.344	3.8892	-76.4876	81.6732	-27.2244	102.416	42.7812	-28.5208	-18.1496	75.1912	11.6676
70	-32.41	116.676	50.5596	-23.3352	38.892	-6.482	82.9696	32.41	6.482	-22.0388	33.7064	25.928	-89.4516	-25.928	-106.305	-6.482	-67.4128	-24.6316	-23.3352	6.482	32.41	10.3712	-35.0028	1.2964	-31.1136	45.374	-111.49	-35.0028	-27.2244	-18.1496	-3.8892	11.6676	80.3768	64.82	147.79	54.4488	-136.122	41.4848	127.047	2.5928	-81.6732	59.6344	-20.7424	102.416	42.7812	-32.41	-20.7424	75.1912	10.3712
71	-32.41	116.676	53.1524	-24.6316	38.892	-6.482	85.5624	29.8172	6.482	-22.0388	33.7064	27.2244	-89.4516	-25.928	-107.601	-7.7784	-63.5236	-25.928	-31.1136	9.0748	32.41	11.6676	-38.892	1.2964	-31.1136	45.374	-111.49	-40.1884	-27.2244	-18.1496	-3.8892	10.3712	81.6732	70.0056	147.79	54.4488	-128.344	40.1884	127.047	1.2964	-67.4128	51.856	-19.446	107.601	45.374	-33.7064	-22.0388	76.4876	11.6676
72	-32.41	116.676	53.1524	-24.6316	38.892	-6.482	90.748	27.2244	6.482	-22.0388	33.7064	27.2244	-89.4516	-24.6316	-107.601	-9.0748	-64.82	-24.6316	-31.1136	9.0748	33.7064	11.6676	-42.7812	0	-28.5208	50.5596	-108.898	-40.1884	-27.2244	-18.1496	-2.5928	10.3712	84.266	70.0056	147.79	54.4488	-119.269	40.1884	127.047	0	-53.1524	53.1524	-19.446	114.083	42.7812	-37.5956	-25.928	77.784	12.964
73	-32.41	116.676	53.1524	-24.6316	33.7064	-5.1856	92.0444	27.2244	11.6676	-22.0388	32.41	28.5208	-88.1552	-25.928	-107.601	-9.0748	-64.82	-24.6316	-32.41	9.0748	33.7064	11.6676	-45.374	0	-25.928	51.856	-102.416	-41.4848	-28.5208	-19.446	2.5928	16.8532	81.6732	76.4876	147.79	54.4488	-127.047	40.1884	124.454	0	-49.2632	57.0416	-22.0388	123.158	41.4848	-40.1884	-28.5208	79.0804	14.2604
74	-32.41	116.676	53.1524	-24.6316	28.5208	-3.8892	94.6372	25.928	11.6676	-22.0388	32.41	28.5208	-89.4516	-25.928	-108.898	-10.3712	-64.82	-24.6316	-33.7064	9.0748	33.7064	11.6676	-42.7812	-2.5928	-24.6316	51.856	-101.119	-49.2632	-27.2244	-24.6316	5.1856	22.0388	76.4876	76.4876	147.79	53.1524	-134.826	40.1884	121.862	1.2964	-57.0416	81.6732	-16.8532	128.344	38.892	-46.6704	-31.1136	80.3768	15.5568
75	-29.8172	115.38	54.4488	-24.6316	36.2992	0	120.565	27.2244	11.6676	-22.0388	31.1136	29.8172	-89.4516	-22.0388	-108.898	-11.6676	-66.1164	-25.928	-36.2992	9.0748	33.7064	11.6676	-42.7812	-2.5928	-18.1496	53.1524	-101.119	-49.2632	-24.6316	-24.6316	5.1856	24.6316	77.784	79.0804	150.382	53.1524	-136.122	40.1884	111.49	-10.3712	-66.1164	89.4516	-16.8532	133.529	36.2992	-54.4488	-27.2244	80.3768	16.8532
76	-29.8172	115.38	57.0416	-24.6316	38.892	-2.5928	106.305	32.41	10.3712	-22.0388	29.8172	32.41	-88.1552	-22.0388	-111.49	-14.2604	-63.5236	-23.3352	-40.1884	9.0748	33.7064	11.6676	-42.7812	-3.8892	-15.5568	59.6344	-105.008	-47.9668	-23.3352	-24.6316	7.7784	25.928	80.3768	76.4876	151.679	53.1524	-138.715	41.4848	106.305	-12.964	-73.8948	89.4516	-15.5568	136.122	32.41	-62.2272	-27.2244	82.9696	18.1496
77	-29.8172	112.787	57.0416	-23.3352	38.892	-5.1856	105.008	33.7064	11.6676	-22.0388	28.5208	32.41	-88.1552	-23.3352	-108.898	-10.3712	-60.9308	-28.5208	-40.1884	9.0748	33.7064	12.964	-42.7812	-6.482	-15.5568	59.6344	-101.119	-41.4848	-22.0388	-29.8172	11.6676	27.2244	81.6732	73.8948	152.975	50.5596	-138.715	41.4848	102.416	-14.2604	-80.3768	89.4516	-15.5568	137.418	24.6316	-68.7092	-24.6316	81.6732	16.8532
78	-29.8172	112.787	58.338	-22.0388	38.892	-6.482	105.008	33.7064	11.6676	-18.1496	28.5208	32.41	-88.1552	-22.0388	-108.898	-10.3712	-63.5236	-24.6316	-44.0776	9.0748	35.0028	12.964	-45.374	-7.7784	-11.6676	59.6344	-92.0444	-49.2632	-22.0388	-38.892	14.2604	27.2244	81.6732	66.1164	154.272	50.5596	-129.64	33.7064	95.9336	-14.2604	-81.6732	72.5984	-18.1496	137.418	22.0388	-67.4128	-24.6316	81.6732	18.1496
79	-29.8172	112.787	59.6344	-22.0388	38.892	-2.5928	105.008	33.7064	11.6676	-16.8532	27.2244	33.7064	-88.1552	-22.0388	-108.898	-10.3712	-64.82	-31.1136	-45.374	9.0748	35.0028	12.964	-46.6704	-9.0748	-10.3712	59.6344	-88.1552	-45.374	-24.6316	-45.374	10.3712	22.0388	81.6732	68.7092	154.272	50.5596	-123.158	28.5208	88.1552	-7.7784	-59.6344	67.4128	-18.1496	132.233	18.1496	-68.7092	-24.6316	82.9696	19.446
80	-31.1136	116.676	60.9308	-22.0388	38.892	1.2964	106.305	28.5208	9.0748	-15.5568	25.928	35.0028	-89.4516	-22.0388	-110.194	-11.6676	-64.82	-32.41	-45.374	9.0748	36.2992	14.2604	-54.4488	-9.0748	-2.5928	68.7092	-67.4128	-32.41	-27.2244	-47.9668	7.7784	22.0388	82.9696	70.0056	154.272	50.5596	-121.862	27.2244	84.266	-10.3712	-49.2632	72.5984	-18.1496	128.344	19.446	-66.1164	-20.7424	82.9696	20.7424
81	-31.1136	119.269	64.82	-22.0388	36.2992	2.5928	108.898	27.2244	5.1856	-11.6676	23.3352	38.892	-92.0444	-19.446	-110.194	-14.2604	-63.5236	-33.7064	-45.374	9.0748	36.2992	18.1496	-62.2272	-11.6676	-2.5928	68.7092	-53.1524	-25.928	-37.5956	-60.9308	10.3712	22.0388	89.4516	77.784	154.272	50.5596	-137.418	28.5208	79.0804	-7.7784	-40.1884	86.8588	-14.2604	127.047	18.1496	-63.5236	-19.446	84.266	22.0388
82	-27.2244	127.047	67.4128	-22.0388	36.2992	2.5928	112.787	27.2244	5.1856	-7.7784	22.0388	40.1884	-90.748	-23.3352	-111.49	-12.964	-66.1164	-33.7064	-45.374	9.0748	41.4848	19.446	-64.82	-11.6676	3.8892	67.4128	-45.374	-20.7424	-37.5956	-60.9308	14.2604	29.8172	89.4516	77.784	154.272	50.5596	-137.418	24.6316	75.1912	-14.2604	-41.4848	103.712	-11.6676	130.936	20.7424	-63.5236	-19.446	86.8588	22.0388
83	-22.0388	134.826	68.7092	-22.0388	35.0028	2.5928	114.083	27.2244	9.0748	-5.1856	20.7424	41.4848	-92.0444	-20.7424	-112.787	-16.8532	-66.1164	-32.41	-49.2632	9.0748	41.4848	19.446	-66.1164	-11.6676	6.482	67.4128	-45.374	-16.8532	-32.41	-54.4488	14.2604	29.8172	89.4516	77.784	154.272	50.5596	-124.454	24.6316	71.302	-18.1496	-49.2632	117.972	-14.2604	130.936	23.3352	-62.2272	-19.446	88.1552	23.3352
84	-18.1496	134.826	68.7092	-20.7424	33.7064	6.482	112.787	27.2244	10.3712	-3.8892	18.1496	44.0776	-92.0444	-23.3352	-114.083	-16.8532	-68.7092	-31.1136	-49.2632	9.0748	41.4848	19.446	-66.1164	-11.6676	7.7784	67.4128	-22.0388	10.3712	-28.5208	-53.1524	14.2604	29.8172	85.5624	79.0804	154.272	50.5596	-123.158	25.928	68.7092	-22.0388	-63.5236	123.158	-14.2604	128.344	23.3352	-62.2272	-16.8532	88.1552	23.3352
85	-18.1496	134.826	70.0056	-20.7424	32.41	9.0748	110.194	28.5208	9.0748	-1.2964	19.446	42.7812	-93.3408	-20.7424	-114.083	-15.5568	-72.5984	-33.7064	-49.2632	10.3712	41.4848	20.7424	-66.1164	-12.964	10.3712	71.302	-16.8532	29.8172	-22.0388	-53.1524	11.6676	27.2244	84.266	81.6732	154.272	50.5596	-127.047	28.5208	64.82	-23.3352	-76.4876	117.972	-19.446	128.344	27.2244	-62.2272	-14.2604	86.8588	24.6316
86	-16.8532	137.418	73.8948	-20.7424	32.41	9.0748	112.787	28.5208	9.0748	-2.5928	18.1496	46.6704	-94.6372	-18.1496	-116.676	-16.8532	-71.302	-36.2992	-49.2632	12.964	41.4848	20.7424	-66.1164	-14.2604	10.3712	75.1912	-16.8532	45.374	-15.5568	-53.1524	11.6676	25.928	80.3768	85.5624	154.272	50.5596	-127.047	28.5208	66.1164	-28.5208	-79.0804	114.083	-20.7424	128.344	25.928	-63.5236	-9.0748	86.8588	23.3352
87	-15.5568	142.604	73.8948	-19.446	32.41	9.0748	114.083	28.5208	9.0748	-3.8892	18.1496	46.6704	-95.9336	-18.1496	-117.972	-16.8532	-71.302	-36.2992	-49.2632	12.964	42.7812	20.7424	-71.302	-15.5568	15.5568	77.784	-14.2604	62.2272	-15.5568	-54.4488	12.964	25.928	80.3768	88.1552	154.272	50.5596	-129.64	28.5208	64.82	-32.41	-77.784	111.49	-19.446	127.047	28.5208	-72.5984	-10.3712	88.1552	22.0388
88	-9.0748	155.568	73.8948	-19.446	32.41	7.7784	116.676	29.8172	9.0748	-3.8892	18.1496	47.9668	-97.23	-18.1496	-117.972	-18.1496	-76.4876	-36.2992	-51.856	12.964	44.0776	20.7424	-72.5984	-15.5568	19.446	80.3768	-20.7424	62.2272	-19.446	-58.338	14.2604	28.5208	80.3768	88.1552	154.272	50.5596	-129.64	28.5208	64.82	-37.5956	-75.1912	108.898	-22.0388	125.751	28.5208	-72.5984	-15.5568	86.8588	22.0388
89	1.2964	169.828	72.5984	-18.1496	32.41	7.7784	117.972	36.2992	6.482	-5.1856	18.1496	49.2632	-97.23	-19.446	-119.269	-18.1496	-72.5984	-37.5956	-51.856	12.964	44.0776	20.7424	-73.8948	-16.8532	22.0388	80.3768	-27.2244	68.7092	-22.0388	-62.2272	15.5568	27.2244	80.3768	88.1552	154.272	50.5596	-129.64	28.5208	66.1164	-41.4848	-71.302	105.008	-22.0388	124.454	27.2244	-68.7092	-11.6676	85.5624	22.0388
90	5.1856	169.828	73.8948	-19.446	32.41	9.0748	123.158	28.5208	6.482	-5.1856	18.1496	49.2632	-97.23	-24.6316	-120.565	-19.446	-79.0804	-36.2992	-51.856	12.964	45.374	20.7424	-81.6732	-19.446	24.6316	80.3768	-33.7064	75.1912	-22.0388	-63.5236	12.964	28.5208	80.3768	94.6372	154.272	50.5596	-123.158	32.41	63.5236	-45.374	-60.9308	99.8228	-14.2604	117.972	24.6316	-67.4128	-11.6676	88.1552	20.7424
91	10.3712	169.828	75.1912	-20.7424	32.41	11.6676	123.158	27.2244	6.482	-5.1856	16.8532	51.856	-98.5264	-24.6316	-119.269	-22.0388	-75.1912	-38.892	-51.856	14.2604	45.374	20.7424	-81.6732	-19.446	24.6316	80.3768	-32.41	111.49	-22.0388	-64.82	11.6676	27.2244	80.3768	98.5264	154.272	50.5596	-121.862	33.7064	63.5236	-50.5596	-51.856	95.9336	-14.2604	115.38	25.928	-68.7092	-16.8532	92.0444	23.3352
92	10.3712	172.421	75.1912	-20.7424	35.0028	11.6676	124.454	25.928	9.0748	-5.1856	15.5568	51.856	-98.5264	-24.6316	-120.565	-23.3352	-79.0804	-38.892	-53.1524	14.2604	45.374	20.7424	-81.6732	-19.446	29.8172	82.9696	-27.2244	124.454	-16.8532	-66.1164	7.7784	28.5208	77.784	106.305	154.272	50.5596	-121.862	33.7064	59.6344	-54.4488	-49.2632	97.23	-16.8532	115.38	25.928	-67.4128	-16.8532	97.23	23.3352
93	14.2604	171.125	73.8948	-20.7424	38.892	11.6676	124.454	24.6316	10.3712	-5.1856	15.5568	51.856	-99.8228	-23.3352	-120.565	-24.6316	-79.0804	-40.1884	-49.2632	18.1496	51.856	19.446	-86.8588	-19.446	31.1136	86.8588	-23.3352	136.122	-15.5568	-67.4128	7.7784	27.2244	77.784	108.898	146.493	64.82	-121.862	33.7064	53.1524	-58.338	-47.9668	99.8228	-19.446	117.972	27.2244	-70.0056	-18.1496	98.5264	24.6316
94	33.7064	172.421	73.8948	-22.0388	38.892	11.6676	125.751	22.0388	6.482	-1.2964	15.5568	50.5596	-99.8228	-23.3352	-121.862	-25.928	-79.0804	-40.1884	-45.374	20.7424	50.5596	20.7424	-88.1552	-12.964	31.1136	86.8588	-19.446	149.086	-12.964	-67.4128	7.7784	27.2244	75.1912	111.49	146.493	64.82	-127.047	33.7064	47.9668	-63.5236	-46.6704	102.416	-22.0388	120.565	29.8172	-71.302	-18.1496	97.23	25.928
95	36.2992	185.385	75.1912	-23.3352	38.892	11.6676	129.64	15.5568	5.1856	-2.5928	15.5568	51.856	-101.119	-22.0388	-124.454	-25.928	-81.6732	-37.5956	-41.4848	20.7424	49.2632	20.7424	-88.1552	-9.0748	36.2992	86.8588	-19.446	169.828	-12.964	-67.4128	7.7784	28.5208	71.302	111.49	146.493	64.82	-127.047	33.7064	44.0776	-68.7092	-49.2632	115.38	-20.7424	125.751	29.8172	-73.8948	-19.446	97.23	24.6316
96	29.8172	198.349	77.784	-24.6316	40.1884	10.3712	129.64	6.482	5.1856	-2.5928	15.5568	54.4488	-101.119	-24.6316	-124.454	-27.2244	-81.6732	-37.5956	-37.5956	22.0388	49.2632	19.446	-88.1552	-6.482	38.892	88.1552	-3.8892	177.607	-12.964	-67.4128	7.7784	28.5208	66.1164	102.416	146.493	64.82	-124.454	33.7064	42.7812	-75.1912	-54.4488	125.751	-22.0388	129.64	29.8172	-75.1912	-18.1496	95.9336	24.6316
97	12.964	199.646	77.784	-27.2244	40.1884	3.8892	132.233	-1.2964	5.1856	-2.5928	16.8532	54.4488	-102.416	-25.928	-124.454	-29.8172	-82.9696	-37.5956	-33.7064	22.0388	47.9668	15.5568	-89.4516	-2.5928	40.1884	90.748	6.482	171.125	-14.2604	-63.5236	7.7784	28.5208	71.302	101.119	147.79	73.8948	-124.454	33.7064	38.892	-79.0804	-57.0416	128.344	-20.7424	130.936	29.8172	-75.1912	-19.446	95.9336	22.0388
98	12.964	199.646	79.0804	-27.2244	38.892	3.8892	140.011	-18.1496	5.1856	-2.5928	16.8532	55.7452	-102.416	-28.5208	-125.751	-31.1136	-85.5624	-36.2992	-27.2244	23.3352	45.374	19.446	-93.3408	0	44.0776	95.9336	9.0748	175.014	-15.5568	-62.2272	6.482	27.2244	72.5984	101.119	147.79	73.8948	-119.269	33.7064	33.7064	-82.9696	-54.4488	134.826	-18.1496	129.64	33.7064	-79.0804	-19.446	97.23	22.0388
99	27.2244	199.646	81.6732	-28.5208	35.0028	9.0748	145.197	-25.928	5.1856	-2.5928	18.1496	54.4488	-102.416	-29.8172	-127.047	-29.8172	-84.266	-38.892	-24.6316	23.3352	44.0776	19.446	-90.748	-3.8892	46.6704	98.5264	6.482	175.014	-15.5568	-60.9308	6.482	25.928	68.7092	112.787	150.382	73.8948	-114.083	33.7064	31.1136	-88.1552	-50.5596	142.604	-18.1496	128.344	36.2992	-80.3768	-22.0388	102.416	20.7424
100	27.2244	199.646	84.266	-29.8172	35.0028	9.0748	154.272	-27.2244	5.1856	-1.2964	18.1496	54.4488	-102.416	-31.1136	-128.344	-32.41	-89.4516	-36.2992	-23.3352	23.3352	45.374	20.7424	-93.3408	-2.5928	50.5596	99.8228	3.8892	168.532	-15.5568	-58.338	6.482	25.928	67.4128	112.787	150.382	73.8948	-112.787	33.7064	29.8172	-93.3408	-49.2632	147.79	-18.1496	127.047	38.892	-81.6732	-23.3352	106.305	19.446
101	24.6316	199.646	86.8588	-31.1136	27.2244	11.6676	160.754	-32.41	5.1856	0	18.1496	55.7452	-102.416	-29.8172	-128.344	-35.0028	-86.8588	-36.2992	-19.446	23.3352	51.856	19.446	-93.3408	-6.482	53.1524	101.119	3.8892	164.643	-15.5568	-57.0416	5.1856	24.6316	60.9308	103.712	150.382	73.8948	-116.676	32.41	25.928	-98.5264	-47.9668	151.679	-19.446	130.936	40.1884	-80.3768	-20.7424	106.305	20.7424
102	22.0388	199.646	93.3408	-32.41	28.5208	14.2604	163.346	-38.892	5.1856	2.5928	19.446	55.7452	-103.712	-31.1136	-128.344	-35.0028	-86.8588	-36.2992	-15.5568	23.3352	51.856	19.446	-88.1552	-16.8532	53.1524	102.416	3.8892	164.643	-6.482	-55.7452	5.1856	20.7424	60.9308	98.5264	151.679	73.8948	-119.269	29.8172	20.7424	-99.8228	-44.0776	154.272	-20.7424	133.529	40.1884	-79.0804	-20.7424	107.601	20.7424
103	24.6316	199.646	95.9336	-32.41	29.8172	9.0748	168.532	-41.4848	-2.5928	-1.2964	19.446	55.7452	-103.712	-32.41	-129.64	-36.2992	-90.748	-33.7064	-12.964	25.928	49.2632	19.446	-88.1552	-28.5208	60.9308	107.601	3.8892	167.236	-5.1856	-55.7452	5.1856	20.7424	60.9308	95.9336	152.975	73.8948	-79.0804	36.2992	14.2604	-98.5264	-42.7812	156.864	-20.7424	134.826	40.1884	-77.784	-18.1496	108.898	18.1496
104	22.0388	212.61	97.23	-33.7064	29.8172	9.0748	169.828	-42.7812	-1.2964	-1.2964	20.7424	55.7452	-105.008	-32.41	-130.936	-35.0028	-89.4516	-36.2992	-7.7784	25.928	49.2632	20.7424	-103.712	-32.41	62.2272	108.898	3.8892	167.236	-3.8892	-57.0416	5.1856	20.7424	60.9308	95.9336	154.272	73.8948	-86.8588	36.2992	10.3712	-95.9336	-42.7812	156.864	-20.7424	137.418	40.1884	-76.4876	-18.1496	111.49	22.0388
105	22.0388	221.684	99.8228	-35.0028	29.8172	9.0748	169.828	-42.7812	2.5928	0	20.7424	55.7452	-105.008	-33.7064	-130.936	-36.2992	-89.4516	-36.2992	-7.7784	25.928	53.1524	20.7424	-112.787	-29.8172	62.2272	101.119	3.8892	163.346	-1.2964	-58.338	5.1856	20.7424	60.9308	97.23	155.568	79.0804	-102.416	33.7064	6.482	-98.5264	-50.5596	156.864	-20.7424	136.122	40.1884	-75.1912	-18.1496	110.194	20.7424
106	22.0388	225.574	101.119	-35.0028	32.41	9.0748	167.236	-37.5956	0	2.5928	20.7424	58.338	-106.305	-33.7064	-132.233	-38.892	-90.748	-33.7064	-7.7784	27.2244	55.7452	20.7424	-114.083	-24.6316	68.7092	98.5264	3.8892	154.272	0	-58.338	5.1856	20.7424	60.9308	106.305	155.568	80.3768	-102.416	33.7064	3.8892	-99.8228	-53.1524	155.568	-22.0388	132.233	42.7812	-77.784	-15.5568	108.898	22.0388
107	22.0388	229.463	106.305	-36.2992	32.41	15.5568	169.828	-35.0028	-1.2964	2.5928	20.7424	58.338	-107.601	-33.7064	-130.936	-40.1884	-89.4516	-35.0028	-12.964	29.8172	55.7452	20.7424	-120.565	-15.5568	71.302	94.6372	5.1856	149.086	0	-55.7452	5.1856	20.7424	63.5236	112.787	151.679	81.6732	-102.416	32.41	2.5928	-102.416	-53.1524	152.975	-23.3352	133.529	42.7812	-79.0804	-14.2604	107.601	20.7424
108	25.928	230.759	107.601	-36.2992	35.0028	20.7424	177.607	-35.0028	-1.2964	2.5928	20.7424	58.338	-108.898	-33.7064	-132.233	-40.1884	-90.748	-35.0028	-15.5568	33.7064	57.0416	25.928	-125.751	-9.0748	77.784	93.3408	-2.5928	147.79	3.8892	-53.1524	3.8892	20.7424	58.338	119.269	145.197	82.9696	-102.416	32.41	1.2964	-102.416	-54.4488	150.382	-25.928	133.529	46.6704	-80.3768	-14.2604	108.898	19.446
109	33.7064	234.648	110.194	-36.2992	36.2992	20.7424	180.2	-35.0028	-1.2964	5.1856	20.7424	58.338	-108.898	-36.2992	-133.529	-40.1884	-92.0444	-35.0028	-16.8532	37.5956	57.0416	28.5208	-128.344	-7.7784	79.0804	93.3408	-9.0748	147.79	9.0748	-50.5596	3.8892	19.446	55.7452	124.454	150.382	89.4516	-102.416	32.41	1.2964	-102.416	-54.4488	145.197	-27.2244	130.936	51.856	-80.3768	-15.5568	114.083	19.446
110	33.7064	237.241	112.787	-37.5956	36.2992	18.1496	182.792	-35.0028	2.5928	7.7784	20.7424	58.338	-110.194	-35.0028	-133.529	-40.1884	-90.748	-37.5956	-19.446	37.5956	53.1524	28.5208	-129.64	-7.7784	82.9696	92.0444	-12.964	147.79	10.3712	-53.1524	5.1856	19.446	55.7452	121.862	151.679	86.8588	-102.416	32.41	1.2964	-103.712	-57.0416	142.604	-28.5208	136.122	54.4488	-79.0804	-14.2604	114.083	18.1496
111	33.7064	239.834	115.38	-36.2992	33.7064	16.8532	184.089	-32.41	0	7.7784	19.446	60.9308	-110.194	-35.0028	-134.826	-37.5956	-92.0444	-35.0028	-19.446	38.892	50.5596	27.2244	-130.936	-7.7784	84.266	92.0444	-22.0388	145.197	9.0748	-57.0416	6.482	15.5568	59.6344	121.862	152.975	85.5624	-99.8228	33.7064	1.2964	-105.008	-55.7452	138.715	-28.5208	137.418	57.0416	-79.0804	-12.964	114.083	18.1496
112	33.7064	242.427	117.972	-37.5956	33.7064	15.5568	184.089	-32.41	-2.5928	7.7784	19.446	59.6344	-110.194	-36.2992	-134.826	-38.892	-92.0444	-35.0028	-23.3352	42.7812	49.2632	27.2244	-130.936	-7.7784	86.8588	90.748	-23.3352	145.197	6.482	-66.1164	6.482	15.5568	63.5236	121.862	154.272	85.5624	-98.5264	33.7064	0	-105.008	-51.856	134.826	-28.5208	136.122	57.0416	-79.0804	-12.964	115.38	18.1496
113	42.7812	243.723	120.565	-36.2992	33.7064	15.5568	189.274	-32.41	-2.5928	7.7784	16.8532	59.6344	-111.49	-35.0028	-134.826	-40.1884	-92.0444	-36.2992	-24.6316	42.7812	49.2632	27.2244	-136.122	-7.7784	92.0444	86.8588	-20.7424	155.568	6.482	-70.0056	6.482	12.964	64.82	124.454	154.272	85.5624	-94.6372	33.7064	2.5928	-107.601	-49.2632	134.826	-28.5208	137.418	59.6344	-82.9696	-12.964	116.676	18.1496
114	45.374	242.427	124.454	-37.5956	29.8172	14.2604	168.532	-29.8172	-3.8892	7.7784	18.1496	59.6344	-111.49	-36.2992	-136.122	-40.1884	-92.0444	-37.5956	-27.2244	42.7812	49.2632	27.2244	-138.715	-7.7784	92.0444	84.266	-16.8532	158.161	7.7784	-70.0056	5.1856	12.964	66.1164	128.344	162.05	80.3768	-92.0444	33.7064	2.5928	-106.305	-46.6704	133.529	-35.0028	137.418	60.9308	-84.266	-10.3712	115.38	19.446
115	45.374	238.538	125.751	-37.5956	29.8172	14.2604	168.532	-27.2244	-3.8892	7.7784	18.1496	59.6344	-111.49	-37.5956	-136.122	-40.1884	-92.0444	-37.5956	-27.2244	42.7812	49.2632	27.2244	-143.9	-2.5928	92.0444	82.9696	-16.8532	162.05	3.8892	-57.0416	6.482	11.6676	64.82	132.233	167.236	75.1912	-92.0444	33.7064	12.964	-120.565	-45.374	130.936	-38.892	133.529	63.5236	-89.4516	-7.7784	112.787	20.7424
116	45.374	239.834	128.344	-36.2992	32.41	14.2604	171.125	-27.2244	-3.8892	7.7784	18.1496	62.2272	-111.49	-37.5956	-138.715	-41.4848	-94.6372	-37.5956	-28.5208	42.7812	47.9668	27.2244	-143.9	2.5928	95.9336	79.0804	-25.928	167.236	1.2964	-47.9668	10.3712	11.6676	63.5236	134.826	168.532	72.5984	-88.1552	33.7064	15.5568	-124.454	-45.374	129.64	-40.1884	129.64	67.4128	-89.4516	-2.5928	108.898	23.3352
117	49.2632	242.427	129.64	-36.2992	33.7064	10.3712	177.607	-15.5568	-9.0748	10.3712	18.1496	60.9308	-111.49	-37.5956	-138.715	-41.4848	-95.9336	-37.5956	-31.1136	42.7812	47.9668	25.928	-145.197	5.1856	101.119	79.0804	-38.892	175.014	1.2964	-47.9668	11.6676	11.6676	45.374	149.086	159.457	73.8948	-86.8588	33.7064	22.0388	-132.233	-45.374	124.454	-41.4848	130.936	70.0056	-93.3408	2.5928	108.898	23.3352
118	53.1524	242.427	129.64	-35.0028	38.892	9.0748	177.607	-7.7784	-9.0748	14.2604	-3.8892	28.5208	-112.787	-37.5956	-140.011	-42.7812	-97.23	-37.5956	-31.1136	42.7812	49.2632	22.0388	-149.086	7.7784	102.416	77.784	-41.4848	175.014	7.7784	-47.9668	11.6676	11.6676	45.374	154.272	155.568	79.0804	-84.266	28.5208	23.3352	-133.529	-45.374	119.269	-40.1884	127.047	71.302	-93.3408	6.482	105.008	24.6316
119	53.1524	242.427	128.344	-33.7064	38.892	7.7784	175.014	0	-9.0748	16.8532	-5.1856	27.2244	-114.083	-36.2992	-140.011	-42.7812	-97.23	-37.5956	-31.1136	42.7812	47.9668	22.0388	-151.679	10.3712	106.305	75.1912	-49.2632	176.31	9.0748	-50.5596	11.6676	11.6676	51.856	152.975	154.272	89.4516	-84.266	25.928	6.482	-120.565	-15.5568	124.454	-38.892	128.344	72.5984	-94.6372	7.7784	105.008	23.3352
120	53.1524	241.13	129.64	-32.41	32.41	10.3712	169.828	6.482	-9.0748	16.8532	-5.1856	27.2244	-112.787	-35.0028	-138.715	-42.7812	-97.23	-37.5956	-32.41	42.7812	45.374	23.3352	-159.457	10.3712	108.898	71.302	-53.1524	189.274	20.7424	-54.4488	11.6676	11.6676	58.338	156.864	155.568	94.6372	-84.266	24.6316	0	-111.49	5.1856	129.64	-41.4848	124.454	72.5984	-95.9336	7.7784	105.008	23.3352
121	53.1524	241.13	132.233	-32.41	33.7064	9.0748	168.532	10.3712	-9.0748	18.1496	-6.482	28.5208	-111.49	-33.7064	-141.308	-44.0776	-101.119	-35.0028	-33.7064	44.0776	45.374	25.928	-165.939	16.8532	111.49	70.0056	-36.2992	194.46	23.3352	-54.4488	18.1496	7.7784	59.6344	158.161	158.161	95.9336	-84.266	23.3352	0	-108.898	5.1856	132.233	-37.5956	125.751	73.8948	-95.9336	12.964	103.712	24.6316
122	53.1524	241.13	133.529	-31.1136	33.7064	6.482	176.31	12.964	-10.3712	19.446	-6.482	28.5208	-111.49	-32.41	-141.308	-42.7812	-97.23	-36.2992	-37.5956	46.6704	44.0776	27.2244	-175.014	18.1496	119.269	67.4128	-32.41	197.053	23.3352	-54.4488	18.1496	7.7784	64.82	158.161	165.939	94.6372	-88.1552	16.8532	2.5928	-110.194	6.482	133.529	-38.892	129.64	76.4876	-97.23	15.5568	107.601	23.3352
123	53.1524	242.427	132.233	-31.1136	33.7064	3.8892	176.31	14.2604	-10.3712	22.0388	-6.482	28.5208	-110.194	-31.1136	-140.011	-44.0776	-97.23	-37.5956	-41.4848	47.9668	50.5596	27.2244	-182.792	18.1496	106.305	57.0416	-25.928	202.238	23.3352	-54.4488	18.1496	5.1856	67.4128	156.864	165.939	94.6372	-88.1552	16.8532	3.8892	-111.49	9.0748	137.418	-35.0028	130.936	77.784	-97.23	18.1496	107.601	24.6316
124	53.1524	247.612	130.936	-31.1136	32.41	2.5928	176.31	6.482	-10.3712	24.6316	-7.7784	29.8172	-110.194	-29.8172	-138.715	-44.0776	-95.9336	-37.5956	-44.0776	47.9668	57.0416	25.928	-186.682	11.6676	101.119	53.1524	-22.0388	203.535	23.3352	-54.4488	-1.2964	7.7784	67.4128	154.272	165.939	95.9336	-88.1552	16.8532	-2.5928	-98.5264	10.3712	141.308	-32.41	128.344	77.784	-95.9336	24.6316	107.601	25.928
125	53.1524	260.576	130.936	-29.8172	32.41	2.5928	176.31	7.7784	-37.5956	35.0028	-7.7784	31.1136	-110.194	-29.8172	-141.308	-44.0776	-98.5264	-36.2992	-49.2632	47.9668	58.338	25.928	-186.682	11.6676	101.119	53.1524	-16.8532	206.128	23.3352	-53.1524	-1.2964	7.7784	67.4128	156.864	162.05	97.23	-90.748	18.1496	-3.8892	-94.6372	12.964	145.197	-28.5208	127.047	77.784	-94.6372	27.2244	103.712	25.928
126	46.6704	268.355	133.529	-29.8172	32.41	2.5928	176.31	10.3712	-37.5956	32.41	-6.482	32.41	-110.194	-29.8172	-146.493	-40.1884	-103.712	-33.7064	-53.1524	50.5596	58.338	25.928	-185.385	11.6676	103.712	51.856	-16.8532	206.128	23.3352	-50.5596	-5.1856	10.3712	67.4128	156.864	162.05	98.5264	-90.748	18.1496	-7.7784	-86.8588	16.8532	152.975	-28.5208	128.344	77.784	-92.0444	31.1136	105.008	27.2244
127	33.7064	268.355	134.826	-29.8172	32.41	2.5928	175.014	12.964	-35.0028	27.2244	-5.1856	32.41	-108.898	-29.8172	-143.9	-44.0776	-102.416	-35.0028	-54.4488	50.5596	58.338	25.928	-178.903	20.7424	108.898	50.5596	-16.8532	206.128	23.3352	-47.9668	-5.1856	10.3712	67.4128	158.161	171.125	103.712	-81.6732	18.1496	-6.482	-86.8588	23.3352	159.457	-28.5208	130.936	77.784	-92.0444	36.2992	106.305	29.8172
128	33.7064	273.54	134.826	-29.8172	33.7064	6.482	171.125	14.2604	-33.7064	33.7064	-5.1856	32.41	-108.898	-25.928	-143.9	-45.374	-102.416	-35.0028	-54.4488	51.856	58.338	27.2244	-178.903	23.3352	110.194	50.5596	-12.964	197.053	23.3352	-47.9668	-9.0748	10.3712	67.4128	158.161	175.014	105.008	-81.6732	18.1496	-10.3712	-77.784	25.928	160.754	-29.8172	130.936	76.4876	-92.0444	28.5208	120.565	32.41
129	27.2244	277.43	136.122	-29.8172	33.7064	9.0748	169.828	15.5568	-27.2244	28.5208	-5.1856	33.7064	-107.601	-25.928	-142.604	-45.374	-101.119	-35.0028	-54.4488	51.856	58.338	28.5208	-178.903	25.928	111.49	47.9668	-12.964	197.053	20.7424	-47.9668	-10.3712	10.3712	57.0416	159.457	176.31	106.305	-80.3768	18.1496	-18.1496	-66.1164	28.5208	159.457	-29.8172	129.64	76.4876	-92.0444	20.7424	133.529	33.7064
130	19.446	282.615	136.122	-29.8172	33.7064	9.0748	173.718	18.1496	-20.7424	41.4848	-5.1856	35.0028	-106.305	-24.6316	-150.382	-40.1884	-106.305	-33.7064	-58.338	54.4488	58.338	28.5208	-178.903	27.2244	112.787	47.9668	-10.3712	197.053	19.446	-49.2632	-11.6676	10.3712	55.7452	159.457	167.236	108.898	-62.2272	20.7424	-22.0388	-64.82	31.1136	158.161	-23.3352	130.936	75.1912	-92.0444	18.1496	141.308	35.0028
131	2.5928	285.208	134.826	-28.5208	35.0028	2.5928	177.607	18.1496	-20.7424	42.7812	-5.1856	38.892	-105.008	-24.6316	-154.272	-40.1884	-105.008	-33.7064	-58.338	54.4488	58.338	28.5208	-189.274	25.928	117.972	47.9668	-19.446	189.274	19.446	-50.5596	-11.6676	10.3712	57.0416	162.05	165.939	108.898	-62.2272	20.7424	-41.4848	-42.7812	33.7064	156.864	-22.0388	136.122	75.1912	-90.748	18.1496	147.79	36.2992
132	-1.2964	287.801	134.826	-28.5208	35.0028	2.5928	180.2	18.1496	-12.964	45.374	-3.8892	37.5956	-105.008	-25.928	-152.975	-40.1884	-106.305	-33.7064	-58.338	54.4488	57.0416	28.5208	-190.571	20.7424	117.972	47.9668	-28.5208	167.236	23.3352	-50.5596	-11.6676	10.3712	57.0416	168.532	162.05	110.194	-62.2272	20.7424	-55.7452	-10.3712	36.2992	152.975	-18.1496	137.418	75.1912	-90.748	18.1496	152.975	37.5956
133	-6.482	291.69	138.715	-27.2244	33.7064	-2.5928	182.792	18.1496	-18.1496	42.7812	-2.5928	37.5956	-106.305	-24.6316	-154.272	-40.1884	-106.305	-33.7064	-58.338	54.4488	57.0416	28.5208	-190.571	16.8532	119.269	46.6704	-22.0388	167.236	25.928	-50.5596	-11.6676	7.7784	59.6344	169.828	160.754	111.49	-62.2272	20.7424	-60.9308	2.5928	40.1884	154.272	-11.6676	141.308	76.4876	-92.0444	18.1496	154.272	37.5956
134	-12.964	290.394	138.715	-25.928	33.7064	-3.8892	185.385	19.446	-16.8532	42.7812	-2.5928	37.5956	-103.712	-25.928	-152.975	-40.1884	-107.601	-33.7064	-58.338	54.4488	58.338	29.8172	-185.385	15.5568	119.269	45.374	-19.446	164.643	31.1136	-50.5596	-12.964	3.8892	63.5236	180.2	160.754	116.676	-62.2272	20.7424	-68.7092	6.482	42.7812	150.382	-11.6676	143.9	77.784	-92.0444	16.8532	159.457	38.892
135	-12.964	286.504	138.715	-24.6316	36.2992	-5.1856	190.571	19.446	-23.3352	42.7812	-3.8892	37.5956	-103.712	-25.928	-152.975	-40.1884	-108.898	-32.41	-54.4488	51.856	60.9308	29.8172	-184.089	16.8532	112.787	38.892	-20.7424	158.161	32.41	-46.6704	-16.8532	-5.1856	63.5236	172.421	160.754	116.676	-71.302	29.8172	-73.8948	7.7784	38.892	151.679	-12.964	140.011	77.784	-92.0444	16.8532	160.754	38.892
136	-12.964	286.504	141.308	-23.3352	41.4848	-6.482	190.571	19.446	-28.5208	42.7812	0	35.0028	-102.416	-24.6316	-154.272	-41.4848	-107.601	-32.41	-54.4488	51.856	66.1164	27.2244	-185.385	19.446	111.49	35.0028	-41.4848	145.197	32.41	-46.6704	-19.446	-7.7784	63.5236	167.236	163.346	119.269	-71.302	27.2244	-72.5984	16.8532	37.5956	156.864	-9.0748	141.308	77.784	-90.748	14.2604	163.346	37.5956
137	-16.8532	290.394	141.308	-23.3352	41.4848	-10.3712	189.274	20.7424	-32.41	44.0776	1.2964	32.41	-101.119	-24.6316	-152.975	-42.7812	-107.601	-33.7064	-54.4488	51.856	68.7092	25.928	-184.089	20.7424	111.49	31.1136	-53.1524	137.418	33.7064	-46.6704	-19.446	-11.6676	63.5236	167.236	167.236	121.862	-73.8948	19.446	-70.0056	22.0388	40.1884	158.161	-9.0748	142.604	77.784	-90.748	14.2604	167.236	40.1884
138	-12.964	292.986	134.826	-23.3352	41.4848	-14.2604	189.274	24.6316	-31.1136	45.374	0	31.1136	-101.119	-23.3352	-155.568	-42.7812	-111.49	-32.41	-57.0416	51.856	68.7092	23.3352	-186.682	19.446	111.49	31.1136	-53.1524	137.418	33.7064	-46.6704	-20.7424	-14.2604	63.5236	168.532	168.532	121.862	-73.8948	19.446	-57.0416	27.2244	42.7812	159.457	-7.7784	142.604	77.784	-90.748	16.8532	167.236	41.4848
139	-7.7784	292.986	133.529	-20.7424	42.7812	-18.1496	189.274	25.928	-25.928	47.9668	-2.5928	31.1136	-101.119	-24.6316	-155.568	-42.7812	-110.194	-32.41	-57.0416	54.4488	71.302	20.7424	-186.682	19.446	111.49	31.1136	-58.338	134.826	33.7064	-46.6704	-24.6316	-15.5568	63.5236	169.828	175.014	123.158	-75.1912	19.446	-27.2244	58.338	40.1884	162.05	-9.0748	143.9	76.4876	-90.748	16.8532	167.236	45.374
140	-7.7784	291.69	133.529	-22.0388	42.7812	-19.446	193.164	25.928	-18.1496	47.9668	-1.2964	31.1136	-102.416	-24.6316	-154.272	-42.7812	-111.49	-32.41	-57.0416	54.4488	72.5984	19.446	-186.682	19.446	111.49	29.8172	-66.1164	128.344	35.0028	-45.374	-27.2244	-19.446	63.5236	173.718	177.607	123.158	-79.0804	19.446	-29.8172	53.1524	38.892	162.05	-6.482	143.9	77.784	-92.0444	16.8532	165.939	49.2632
141	-7.7784	291.69	132.233	-20.7424	42.7812	-19.446	198.349	25.928	-20.7424	42.7812	-3.8892	32.41	-103.712	-24.6316	-155.568	-41.4848	-112.787	-31.1136	-58.338	54.4488	72.5984	19.446	-190.571	19.446	111.49	28.5208	-67.4128	121.862	38.892	-42.7812	-27.2244	-19.446	63.5236	172.421	177.607	123.158	-72.5984	15.5568	-35.0028	53.1524	37.5956	162.05	-6.482	143.9	77.784	-92.0444	16.8532	165.939	54.4488
142	-7.7784	291.69	132.233	-19.446	42.7812	-19.446	198.349	25.928	-20.7424	37.5956	-3.8892	31.1136	-105.008	-25.928	-155.568	-41.4848	-112.787	-29.8172	-64.82	55.7452	72.5984	18.1496	-193.164	15.5568	111.49	24.6316	-67.4128	117.972	38.892	-42.7812	-27.2244	-19.446	63.5236	167.236	177.607	121.862	-68.7092	15.5568	-37.5956	51.856	33.7064	160.754	-5.1856	145.197	77.784	-92.0444	16.8532	164.643	63.5236
143	-6.482	291.69	132.233	-19.446	42.7812	-20.7424	200.942	25.928	-20.7424	35.0028	-5.1856	31.1136	-106.305	-27.2244	-154.272	-41.4848	-112.787	-29.8172	-60.9308	55.7452	72.5984	15.5568	-194.46	11.6676	111.49	24.6316	-64.82	129.64	40.1884	-41.4848	-27.2244	-18.1496	63.5236	167.236	178.903	120.565	-75.1912	19.446	-37.5956	50.5596	32.41	162.05	-2.5928	146.493	79.0804	-93.3408	16.8532	162.05	68.7092
144	2.5928	294.283	134.826	-18.1496	42.7812	-24.6316	203.535	24.6316	-32.41	37.5956	-7.7784	29.8172	-107.601	-27.2244	-154.272	-41.4848	-112.787	-29.8172	-66.1164	50.5596	72.5984	15.5568	-194.46	10.3712	112.787	23.3352	-66.1164	125.751	40.1884	-41.4848	-28.5208	-15.5568	67.4128	173.718	175.014	121.862	-82.9696	18.1496	-36.2992	46.6704	32.41	162.05	-3.8892	143.9	77.784	-93.3408	15.5568	162.05	75.1912
145	11.6676	294.283	134.826	-16.8532	42.7812	-24.6316	203.535	24.6316	-37.5956	40.1884	-10.3712	27.2244	-108.898	-27.2244	-155.568	-41.4848	-114.083	-28.5208	-66.1164	50.5596	72.5984	15.5568	-194.46	10.3712	115.38	22.0388	-68.7092	125.751	40.1884	-41.4848	-27.2244	-15.5568	67.4128	177.607	173.718	123.158	-62.2272	16.8532	-33.7064	44.0776	32.41	162.05	1.2964	138.715	77.784	-92.0444	16.8532	160.754	94.6372
146	14.2604	294.283	134.826	-16.8532	42.7812	-25.928	206.128	24.6316	-35.0028	36.2992	-10.3712	27.2244	-107.601	-29.8172	-158.161	-38.892	-112.787	-29.8172	-66.1164	47.9668	72.5984	22.0388	-194.46	10.3712	115.38	19.446	-75.1912	134.826	38.892	-41.4848	-27.2244	-15.5568	67.4128	180.2	173.718	125.751	-58.338	15.5568	-32.41	44.0776	35.0028	160.754	3.8892	138.715	77.784	-90.748	16.8532	160.754	98.5264
147	16.8532	292.986	136.122	-15.5568	42.7812	-29.8172	212.61	32.41	-32.41	37.5956	-10.3712	25.928	-107.601	-29.8172	-156.864	-41.4848	-112.787	-29.8172	-66.1164	47.9668	72.5984	25.928	-198.349	10.3712	115.38	16.8532	-73.8948	138.715	38.892	-41.4848	-29.8172	-18.1496	71.302	184.089	171.125	128.344	-71.302	11.6676	-28.5208	40.1884	36.2992	160.754	9.0748	140.011	77.784	-90.748	18.1496	160.754	97.23
148	9.0748	290.394	136.122	-14.2604	42.7812	-32.41	217.795	28.5208	-31.1136	42.7812	-10.3712	25.928	-108.898	-28.5208	-158.161	-38.892	-112.787	-29.8172	-64.82	47.9668	72.5984	25.928	-198.349	11.6676	115.38	16.8532	-70.0056	141.308	32.41	-41.4848	-27.2244	-18.1496	76.4876	186.682	171.125	129.64	-71.302	12.964	-25.928	35.0028	36.2992	159.457	10.3712	137.418	76.4876	-90.748	18.1496	159.457	98.5264
149	5.1856	290.394	136.122	-12.964	45.374	-35.0028	219.092	28.5208	-27.2244	42.7812	-11.6676	25.928	-108.898	-22.0388	-158.161	-38.892	-114.083	-28.5208	-66.1164	51.856	76.4876	28.5208	-198.349	16.8532	115.38	16.8532	-68.7092	141.308	28.5208	-40.1884	-29.8172	-22.0388	82.9696	186.682	171.125	130.936	-71.302	12.964	-23.3352	28.5208	38.892	158.161	11.6676	137.418	76.4876	-90.748	19.446	158.161	95.9336
150	2.5928	290.394	133.529	-12.964	45.374	-40.1884	221.684	28.5208	-27.2244	44.0776	-12.964	25.928	-110.194	-23.3352	-155.568	-40.1884	-114.083	-27.2244	-66.1164	51.856	79.0804	28.5208	-198.349	18.1496	119.269	14.2604	-59.6344	143.9	27.2244	-40.1884	-29.8172	-23.3352	82.9696	186.682	171.125	130.936	-71.302	11.6676	-15.5568	25.928	40.1884	159.457	12.964	138.715	77.784	-90.748	18.1496	158.161	97.23
151	1.2964	287.801	130.936	-11.6676	45.374	-40.1884	234.648	28.5208	-27.2244	36.2992	-14.2604	27.2244	-108.898	-27.2244	-159.457	-36.2992	-115.38	-25.928	-70.0056	51.856	82.9696	29.8172	-198.349	18.1496	119.269	14.2604	-55.7452	145.197	27.2244	-40.1884	-41.4848	-36.2992	68.7092	193.164	167.236	128.344	-88.1552	12.964	-10.3712	22.0388	41.4848	160.754	14.2604	140.011	77.784	-89.4516	18.1496	159.457	101.119
152	2.5928	286.504	129.64	-9.0748	45.374	-41.4848	234.648	28.5208	-27.2244	33.7064	-14.2604	24.6316	-110.194	-27.2244	-159.457	-36.2992	-115.38	-27.2244	-71.302	51.856	82.9696	29.8172	-199.646	15.5568	117.972	15.5568	-47.9668	149.086	27.2244	-40.1884	-41.4848	-36.2992	68.7092	198.349	160.754	146.493	-80.3768	10.3712	10.3712	16.8532	42.7812	162.05	15.5568	140.011	76.4876	-89.4516	19.446	158.161	103.712
153	5.1856	286.504	127.047	-9.0748	45.374	-44.0776	234.648	22.0388	-31.1136	28.5208	-14.2604	23.3352	-111.49	-28.5208	-155.568	-40.1884	-115.38	-27.2244	-71.302	50.5596	84.266	29.8172	-199.646	15.5568	116.676	15.5568	-45.374	150.382	27.2244	-40.1884	-44.0776	-36.2992	75.1912	210.017	163.346	142.604	-63.5236	11.6676	19.446	11.6676	44.0776	162.05	16.8532	140.011	76.4876	-90.748	20.7424	156.864	103.712
154	5.1856	287.801	125.751	-7.7784	45.374	-45.374	235.945	22.0388	-28.5208	24.6316	-22.0388	12.964	-110.194	-29.8172	-158.161	-37.5956	-116.676	-25.928	-68.7092	50.5596	89.4516	29.8172	-199.646	15.5568	115.38	15.5568	-38.892	150.382	27.2244	-35.0028	-49.2632	-36.2992	76.4876	215.202	162.05	128.344	-63.5236	12.964	32.41	18.1496	44.0776	163.346	16.8532	142.604	75.1912	-90.748	19.446	158.161	105.008
155	5.1856	290.394	124.454	-7.7784	45.374	-45.374	235.945	28.5208	-27.2244	24.6316	-29.8172	11.6676	-108.898	-28.5208	-159.457	-38.892	-117.972	-25.928	-66.1164	50.5596	90.748	28.5208	-202.238	12.964	111.49	14.2604	-33.7064	151.679	27.2244	-31.1136	-49.2632	-36.2992	76.4876	216.499	162.05	129.64	-57.0416	12.964	37.5956	19.446	46.6704	163.346	18.1496	140.011	75.1912	-92.0444	20.7424	154.272	108.898
156	9.0748	290.394	123.158	-7.7784	46.6704	-50.5596	238.538	29.8172	-20.7424	29.8172	-32.41	11.6676	-108.898	-29.8172	-162.05	-37.5956	-117.972	-24.6316	-66.1164	50.5596	88.1552	25.928	-203.535	12.964	111.49	14.2604	-29.8172	150.382	27.2244	-29.8172	-50.5596	-37.5956	63.5236	234.648	162.05	129.64	-55.7452	10.3712	41.4848	20.7424	47.9668	164.643	19.446	141.308	76.4876	-92.0444	22.0388	151.679	111.49
157	9.0748	290.394	121.862	-7.7784	46.6704	-51.856	241.13	29.8172	-18.1496	36.2992	-28.5208	10.3712	-107.601	-29.8172	-159.457	-40.1884	-119.269	-24.6316	-66.1164	47.9668	88.1552	25.928	-202.238	11.6676	112.787	14.2604	-28.5208	145.197	24.6316	-25.928	-53.1524	-42.7812	60.9308	237.241	163.346	129.64	-55.7452	9.0748	45.374	20.7424	47.9668	164.643	19.446	141.308	76.4876	-92.0444	23.3352	151.679	114.083
158	7.7784	290.394	121.862	-7.7784	47.9668	-54.4488	241.13	32.41	-16.8532	36.2992	-31.1136	7.7784	-108.898	-29.8172	-163.346	-37.5956	-119.269	-25.928	-66.1164	46.6704	89.4516	23.3352	-200.942	11.6676	112.787	16.8532	-12.964	124.454	24.6316	-24.6316	-55.7452	-45.374	64.82	239.834	163.346	136.122	-55.7452	9.0748	53.1524	18.1496	46.6704	164.643	15.5568	142.604	75.1912	-92.0444	22.0388	154.272	115.38
159	7.7784	290.394	119.269	-7.7784	45.374	-55.7452	241.13	33.7064	-23.3352	37.5956	-32.41	6.482	-107.601	-32.41	-164.643	-37.5956	-120.565	-24.6316	-70.0056	46.6704	89.4516	23.3352	-200.942	11.6676	111.49	19.446	-12.964	115.38	24.6316	-23.3352	-60.9308	-46.6704	68.7092	246.316	160.754	152.975	-55.7452	9.0748	58.338	22.0388	45.374	165.939	20.7424	142.604	73.8948	-90.748	23.3352	162.05	115.38
160	5.1856	290.394	117.972	-6.482	38.892	-58.338	237.241	35.0028	-20.7424	35.0028	-35.0028	6.482	-107.601	-31.1136	-164.643	-37.5956	-121.862	-24.6316	-73.8948	50.5596	90.748	22.0388	-226.87	7.7784	110.194	19.446	-12.964	107.601	23.3352	-18.1496	-66.1164	-47.9668	68.7092	247.612	167.236	149.086	-55.7452	9.0748	60.9308	25.928	45.374	165.939	19.446	141.308	73.8948	-89.4516	27.2244	151.679	117.972
161	3.8892	290.394	115.38	-5.1856	28.5208	-62.2272	237.241	35.0028	-18.1496	35.0028	-35.0028	6.482	-106.305	-35.0028	-168.532	-36.2992	-123.158	-24.6316	-77.784	51.856	92.0444	22.0388	-215.202	9.0748	108.898	19.446	-10.3712	97.23	24.6316	-14.2604	-67.4128	-50.5596	73.8948	255.391	175.014	133.529	-55.7452	9.0748	59.6344	27.2244	41.4848	168.532	20.7424	141.308	72.5984	-88.1552	16.8532	165.939	119.269
162	5.1856	285.208	114.083	-3.8892	27.2244	-62.2272	237.241	35.0028	-18.1496	36.2992	-36.2992	6.482	-106.305	-35.0028	-167.236	-36.2992	-121.862	-24.6316	-77.784	51.856	93.3408	19.446	-213.906	9.0748	106.305	20.7424	-7.7784	88.1552	25.928	-10.3712	-67.4128	-50.5596	75.1912	256.687	177.607	136.122	-55.7452	9.0748	54.4488	31.1136	41.4848	165.939	22.0388	137.418	71.302	-88.1552	10.3712	177.607	123.158
163	3.8892	283.912	111.49	-1.2964	27.2244	-62.2272	241.13	32.41	-19.446	36.2992	-37.5956	5.1856	-107.601	-36.2992	-167.236	-36.2992	-123.158	-24.6316	-77.784	51.856	93.3408	19.446	-211.313	9.0748	106.305	22.0388	-1.2964	88.1552	25.928	-7.7784	-72.5984	-58.338	80.3768	248.909	181.496	129.64	-55.7452	9.0748	55.7452	36.2992	47.9668	160.754	24.6316	136.122	70.0056	-88.1552	6.482	181.496	124.454
164	7.7784	283.912	111.49	-1.2964	27.2244	-60.9308	242.427	27.2244	-25.928	35.0028	-41.4848	5.1856	-107.601	-36.2992	-165.939	-36.2992	-121.862	-25.928	-77.784	51.856	93.3408	18.1496	-211.313	9.0748	106.305	22.0388	3.8892	102.416	27.2244	-5.1856	-72.5984	-58.338	80.3768	248.909	181.496	129.64	-68.7092	10.3712	63.5236	36.2992	50.5596	158.161	24.6316	137.418	68.7092	-86.8588	0	189.274	125.751
165	7.7784	283.912	110.194	0	28.5208	-58.338	245.02	24.6316	-25.928	35.0028	-49.2632	3.8892	-107.601	-36.2992	-164.643	-37.5956	-123.158	-23.3352	-79.0804	51.856	93.3408	15.5568	-211.313	9.0748	103.712	20.7424	5.1856	103.712	28.5208	-2.5928	-67.4128	-55.7452	80.3768	250.205	181.496	129.64	-59.6344	18.1496	80.3768	32.41	51.856	156.864	22.0388	134.826	68.7092	-86.8588	-3.8892	194.46	125.751
166	7.7784	283.912	110.194	2.5928	32.41	-59.6344	247.612	20.7424	-28.5208	37.5956	-49.2632	5.1856	-107.601	-37.5956	-167.236	-37.5956	-124.454	-23.3352	-86.8588	51.856	93.3408	15.5568	-211.313	9.0748	103.712	20.7424	2.5928	103.712	31.1136	0	-64.82	-55.7452	82.9696	278.726	181.496	128.344	-54.4488	19.446	82.9696	40.1884	53.1524	160.754	24.6316	134.826	66.1164	-85.5624	-9.0748	206.128	125.751
167	7.7784	283.912	108.898	3.8892	32.41	-60.9308	247.612	20.7424	-27.2244	41.4848	-51.856	3.8892	-107.601	-37.5956	-165.939	-37.5956	-123.158	-25.928	-86.8588	51.856	93.3408	12.964	-211.313	9.0748	101.119	20.7424	-6.482	110.194	32.41	2.5928	-62.2272	-55.7452	82.9696	286.504	182.792	127.047	-50.5596	27.2244	85.5624	44.0776	63.5236	167.236	27.2244	134.826	64.82	-84.266	-11.6676	210.017	124.454
168	7.7784	283.912	107.601	5.1856	29.8172	-60.9308	247.612	20.7424	-27.2244	41.4848	-53.1524	2.5928	-107.601	-37.5956	-165.939	-38.892	-124.454	-24.6316	-85.5624	50.5596	93.3408	12.964	-211.313	10.3712	99.8228	20.7424	-7.7784	121.862	32.41	5.1856	-62.2272	-58.338	82.9696	289.097	186.682	130.936	-41.4848	27.2244	85.5624	55.7452	71.302	171.125	31.1136	133.529	64.82	-85.5624	-10.3712	207.424	121.862
169	5.1856	282.615	106.305	6.482	25.928	-66.1164	242.427	20.7424	-27.2244	42.7812	-55.7452	2.5928	-107.601	-37.5956	-165.939	-37.5956	-124.454	-24.6316	-85.5624	50.5596	93.3408	12.964	-213.906	10.3712	99.8228	19.446	-7.7784	149.086	33.7064	9.0748	-66.1164	-66.1164	77.784	294.283	191.867	133.529	-41.4848	28.5208	88.1552	62.2272	72.5984	172.421	36.2992	136.122	64.82	-84.266	-10.3712	207.424	120.565
170	5.1856	282.615	105.008	7.7784	25.928	-66.1164	241.13	20.7424	-31.1136	40.1884	-57.0416	1.2964	-108.898	-37.5956	-167.236	-36.2992	-125.751	-22.0388	-89.4516	50.5596	92.0444	11.6676	-213.906	10.3712	99.8228	16.8532	-9.0748	160.754	35.0028	10.3712	-66.1164	-67.4128	75.1912	296.876	193.164	134.826	-40.1884	28.5208	94.6372	62.2272	68.7092	172.421	37.5956	134.826	64.82	-85.5624	-6.482	202.238	119.269
171	5.1856	282.615	103.712	10.3712	25.928	-66.1164	241.13	20.7424	-27.2244	37.5956	-55.7452	2.5928	-108.898	-37.5956	-168.532	-35.0028	-128.344	-22.0388	-92.0444	50.5596	92.0444	11.6676	-213.906	10.3712	99.8228	16.8532	-10.3712	171.125	36.2992	12.964	-64.82	-67.4128	71.302	292.986	194.46	133.529	-40.1884	27.2244	94.6372	64.82	67.4128	171.125	35.0028	127.047	64.82	-86.8588	-25.928	232.056	117.972
172	5.1856	282.615	101.119	10.3712	22.0388	-66.1164	241.13	20.7424	-24.6316	36.2992	-58.338	1.2964	-108.898	-37.5956	-168.532	-35.0028	-133.529	-22.0388	-92.0444	50.5596	92.0444	11.6676	-213.906	11.6676	99.8228	16.8532	-10.3712	182.792	49.2632	15.5568	-66.1164	-72.5984	71.302	285.208	194.46	128.344	-40.1884	27.2244	95.9336	63.5236	63.5236	171.125	36.2992	124.454	64.82	-86.8588	-25.928	233.352	120.565
173	5.1856	282.615	98.5264	10.3712	15.5568	-67.4128	241.13	18.1496	-23.3352	33.7064	-62.2272	0	-108.898	-37.5956	-169.828	-35.0028	-134.826	-23.3352	-92.0444	50.5596	82.9696	6.482	-213.906	11.6676	99.8228	22.0388	-23.3352	177.607	51.856	14.2604	-66.1164	-72.5984	71.302	278.726	200.942	127.047	-40.1884	27.2244	93.3408	59.6344	60.9308	169.828	37.5956	121.862	63.5236	-88.1552	-25.928	232.056	117.972
174	1.2964	283.912	97.23	11.6676	15.5568	-66.1164	242.427	18.1496	-20.7424	28.5208	-62.2272	0	-108.898	-38.892	-169.828	-36.2992	-137.418	-23.3352	-92.0444	50.5596	90.748	5.1856	-213.906	11.6676	99.8228	22.0388	-23.3352	177.607	57.0416	14.2604	-66.1164	-75.1912	68.7092	272.244	211.313	123.158	-44.0776	27.2244	79.0804	54.4488	57.0416	167.236	41.4848	121.862	64.82	-88.1552	-22.0388	226.87	116.676
175	-1.2964	285.208	94.6372	12.964	14.2604	-64.82	242.427	18.1496	-20.7424	25.928	-67.4128	-1.2964	-108.898	-41.4848	-171.125	-36.2992	-138.715	-24.6316	-94.6372	50.5596	97.23	2.5928	-213.906	11.6676	99.8228	22.0388	-20.7424	189.274	63.5236	14.2604	-67.4128	-79.0804	64.82	272.244	213.906	121.862	-44.0776	27.2244	77.784	49.2632	40.1884	160.754	42.7812	121.862	63.5236	-89.4516	-19.446	224.277	115.38
176	-3.8892	285.208	93.3408	15.5568	11.6676	-64.82	242.427	15.5568	-18.1496	25.928	-66.1164	-1.2964	-108.898	-42.7812	-172.421	-35.0028	-140.011	-24.6316	-95.9336	50.5596	95.9336	0	-216.499	9.0748	103.712	23.3352	-23.3352	194.46	67.4128	15.5568	-67.4128	-79.0804	58.338	276.133	215.202	117.972	-46.6704	27.2244	73.8948	46.6704	22.0388	158.161	45.374	125.751	62.2272	-89.4516	-20.7424	224.277	112.787
177	-3.8892	285.208	93.3408	15.5568	11.6676	-64.82	247.612	11.6676	-12.964	27.2244	-67.4128	-1.2964	-110.194	-44.0776	-172.421	-35.0028	-141.308	-23.3352	-98.5264	50.5596	95.9336	0	-219.092	11.6676	103.712	23.3352	-32.41	199.646	68.7092	10.3712	-68.7092	-84.266	49.2632	282.615	225.574	114.083	-47.9668	27.2244	75.1912	42.7812	12.964	160.754	44.0776	124.454	63.5236	-92.0444	-22.0388	226.87	111.49
178	-5.1856	285.208	92.0444	16.8532	12.964	-64.82	250.205	6.482	-20.7424	28.5208	-68.7092	-2.5928	-108.898	-45.374	-173.718	-36.2992	-142.604	-24.6316	-98.5264	47.9668	95.9336	0	-219.092	10.3712	106.305	27.2244	-35.0028	200.942	71.302	9.0748	-68.7092	-85.5624	44.0776	292.986	229.463	114.083	-50.5596	27.2244	80.3768	40.1884	10.3712	167.236	45.374	123.158	62.2272	-93.3408	-7.7784	207.424	111.49
179	-5.1856	285.208	92.0444	16.8532	14.2604	-64.82	250.205	6.482	-20.7424	29.8172	-70.0056	-2.5928	-107.601	-44.0776	-173.718	-36.2992	-143.9	-25.928	-95.9336	44.0776	95.9336	-1.2964	-217.795	10.3712	106.305	28.5208	-12.964	200.942	72.5984	5.1856	-67.4128	-85.5624	41.4848	300.765	229.463	114.083	-50.5596	27.2244	79.0804	29.8172	12.964	176.31	47.9668	123.158	60.9308	-92.0444	3.8892	186.682	112.787
180	-7.7784	281.319	89.4516	18.1496	14.2604	-66.1164	250.205	5.1856	-24.6316	29.8172	-71.302	-2.5928	-106.305	-45.374	-172.421	-36.2992	-145.197	-27.2244	-92.0444	38.892	95.9336	-1.2964	-221.684	5.1856	106.305	28.5208	-9.0748	202.238	73.8948	2.5928	-68.7092	-90.748	37.5956	302.061	230.759	111.49	-50.5596	28.5208	72.5984	20.7424	29.8172	180.2	50.5596	124.454	60.9308	-93.3408	11.6676	169.828	114.083
181	-7.7784	278.726	88.1552	19.446	14.2604	-71.302	252.798	2.5928	-25.928	32.41	-71.302	-1.2964	-106.305	-45.374	-173.718	-35.0028	-145.197	-27.2244	-90.748	35.0028	93.3408	-1.2964	-221.684	3.8892	103.712	29.8172	-3.8892	208.72	76.4876	0	-68.7092	-92.0444	37.5956	292.986	232.056	111.49	-51.856	33.7064	68.7092	16.8532	40.1884	163.346	55.7452	121.862	58.338	-92.0444	12.964	165.939	112.787
182	-7.7784	278.726	86.8588	18.1496	14.2604	-72.5984	252.798	-2.5928	-25.928	35.0028	-72.5984	-2.5928	-107.601	-45.374	-173.718	-36.2992	-145.197	-28.5208	-90.748	33.7064	93.3408	-1.2964	-219.092	1.2964	103.712	29.8172	6.482	208.72	79.0804	0	-68.7092	-94.6372	41.4848	292.986	233.352	111.49	-54.4488	37.5956	70.0056	15.5568	35.0028	150.382	58.338	120.565	58.338	-93.3408	11.6676	167.236	115.38
183	-9.0748	278.726	84.266	18.1496	9.0748	-75.1912	252.798	-7.7784	-25.928	36.2992	-73.8948	-2.5928	-105.008	-47.9668	-176.31	-36.2992	-147.79	-29.8172	-86.8588	31.1136	93.3408	-1.2964	-219.092	0	103.712	29.8172	11.6676	210.017	79.0804	0	-68.7092	-98.5264	44.0776	295.579	222.981	114.083	-55.7452	40.1884	60.9308	14.2604	35.0028	149.086	59.6344	117.972	58.338	-93.3408	11.6676	167.236	115.38
184	-9.0748	282.615	82.9696	18.1496	9.0748	-79.0804	247.612	-15.5568	-27.2244	36.2992	-76.4876	-3.8892	-106.305	-47.9668	-180.2	-37.5956	-151.679	-29.8172	-86.8588	31.1136	92.0444	-1.2964	-219.092	-2.5928	103.712	29.8172	18.1496	210.017	79.0804	1.2964	-68.7092	-99.8228	44.0776	298.172	222.981	119.269	-55.7452	41.4848	59.6344	12.964	36.2992	150.382	60.9308	117.972	57.0416	-93.3408	10.3712	169.828	112.787
185	-15.5568	283.912	80.3768	16.8532	9.0748	-80.3768	245.02	-16.8532	-25.928	33.7064	-79.0804	-3.8892	-105.008	-51.856	-177.607	-37.5956	-160.754	-31.1136	-86.8588	33.7064	90.748	-2.5928	-222.981	-5.1856	102.416	29.8172	32.41	237.241	79.0804	2.5928	-68.7092	-101.119	42.7812	295.579	241.13	128.344	-55.7452	42.7812	53.1524	14.2604	41.4848	155.568	59.6344	117.972	57.0416	-93.3408	10.3712	169.828	112.787
186	-16.8532	282.615	79.0804	18.1496	11.6676	-81.6732	242.427	-22.0388	-24.6316	33.7064	-80.3768	-2.5928	-103.712	-54.4488	-184.089	-37.5956	-164.643	-29.8172	-89.4516	33.7064	90.748	-3.8892	-225.574	-7.7784	102.416	29.8172	12.964	246.316	79.0804	5.1856	-72.5984	-106.305	45.374	294.283	242.427	130.936	-55.7452	42.7812	47.9668	12.964	45.374	159.457	63.5236	117.972	57.0416	-94.6372	9.0748	169.828	115.38
187	-18.1496	278.726	76.4876	16.8532	25.928	-95.9336	241.13	-23.3352	-23.3352	33.7064	-80.3768	-3.8892	-102.416	-54.4488	-195.756	-28.5208	-169.828	-31.1136	-95.9336	33.7064	90.748	-5.1856	-229.463	-11.6676	102.416	31.1136	5.1856	247.612	76.4876	6.482	-82.9696	-108.898	45.374	294.283	246.316	125.751	-62.2272	42.7812	46.6704	12.964	45.374	163.346	67.4128	117.972	55.7452	-93.3408	11.6676	168.532	114.083
188	-18.1496	277.43	75.1912	16.8532	25.928	-101.119	238.538	-27.2244	-32.41	33.7064	-82.9696	-3.8892	-102.416	-54.4488	-198.349	-29.8172	-173.718	-31.1136	-94.6372	33.7064	90.748	-5.1856	-229.463	-11.6676	101.119	31.1136	2.5928	256.687	67.4128	2.5928	-89.4516	-110.194	33.7064	303.358	246.316	125.751	-62.2272	42.7812	40.1884	19.446	44.0776	165.939	70.0056	116.676	55.7452	-92.0444	9.0748	172.421	115.38
189	-20.7424	277.43	73.8948	15.5568	27.2244	-101.119	237.241	-27.2244	-33.7064	33.7064	-82.9696	-5.1856	-103.712	-55.7452	-202.238	-28.5208	-177.607	-32.41	-86.8588	38.892	89.4516	-7.7784	-230.759	-12.964	101.119	31.1136	2.5928	261.873	54.4488	-1.2964	-92.0444	-110.194	32.41	304.654	247.612	125.751	-63.5236	37.5956	36.2992	23.3352	45.374	164.643	67.4128	114.083	57.0416	-93.3408	7.7784	172.421	115.38
190	-23.3352	277.43	72.5984	15.5568	32.41	-106.305	237.241	-29.8172	-37.5956	32.41	-85.5624	-5.1856	-107.601	-57.0416	-203.535	-29.8172	-186.682	-25.928	-85.5624	38.892	89.4516	-7.7784	-230.759	-12.964	101.119	32.41	2.5928	268.355	46.6704	-1.2964	-103.712	-106.305	32.41	308.543	250.205	125.751	-63.5236	35.0028	31.1136	22.0388	45.374	163.346	68.7092	114.083	58.338	-94.6372	7.7784	173.718	114.083
191	-24.6316	277.43	71.302	16.8532	40.1884	-107.601	237.241	-31.1136	-38.892	29.8172	-85.5624	-3.8892	-105.008	-55.7452	-206.128	-29.8172	-185.385	-27.2244	-86.8588	38.892	89.4516	-11.6676	-230.759	-12.964	102.416	35.0028	15.5568	263.169	40.1884	-1.2964	-114.083	-106.305	32.41	316.322	251.502	120.565	-63.5236	35.0028	25.928	22.0388	46.6704	162.05	71.302	111.49	58.338	-94.6372	5.1856	175.014	115.38
192	-29.8172	273.54	70.0056	15.5568	62.2272	-97.23	238.538	-33.7064	-38.892	28.5208	-89.4516	-5.1856	-105.008	-57.0416	-206.128	-29.8172	-190.571	-27.2244	-90.748	41.4848	89.4516	-11.6676	-230.759	-12.964	103.712	37.5956	25.928	261.873	33.7064	-6.482	-116.676	-106.305	33.7064	320.211	251.502	116.676	-66.1164	35.0028	18.1496	24.6316	46.6704	159.457	73.8948	110.194	59.6344	-94.6372	3.8892	176.31	115.38
193	-29.8172	274.837	68.7092	15.5568	68.7092	-93.3408	238.538	-35.0028	-38.892	28.5208	-90.748	-5.1856	-105.008	-57.0416	-220.388	-20.7424	-194.46	-28.5208	-90.748	42.7812	90.748	-7.7784	-224.277	0	103.712	40.1884	28.5208	256.687	31.1136	-7.7784	-120.565	-106.305	27.2244	334.471	254.094	114.083	-66.1164	36.2992	10.3712	31.1136	47.9668	158.161	73.8948	107.601	59.6344	-93.3408	5.1856	175.014	111.49
194	-27.2244	277.43	66.1164	15.5568	68.7092	-93.3408	241.13	-35.0028	-57.0416	27.2244	-94.6372	-6.482	-103.712	-59.6344	-221.684	-19.446	-194.46	-27.2244	-99.8228	46.6704	90.748	-7.7784	-224.277	0	106.305	44.0776	28.5208	255.391	27.2244	-9.0748	-129.64	-101.119	24.6316	338.36	256.687	114.083	-64.82	37.5956	0	40.1884	49.2632	155.568	73.8948	107.601	59.6344	-92.0444	5.1856	176.31	108.898
195	-27.2244	277.43	64.82	14.2604	73.8948	-92.0444	243.723	-37.5956	-63.5236	22.0388	-99.8228	-6.482	-103.712	-58.338	-206.128	-29.8172	-197.053	-27.2244	-103.712	50.5596	90.748	-7.7784	-225.574	0	107.601	45.374	25.928	259.28	24.6316	-9.0748	-130.936	-99.8228	20.7424	344.842	256.687	112.787	-66.1164	42.7812	-19.446	51.856	50.5596	155.568	72.5984	107.601	59.6344	-92.0444	5.1856	177.607	107.601
196	-29.8172	277.43	62.2272	15.5568	75.1912	-92.0444	247.612	-38.892	-63.5236	20.7424	-105.008	-5.1856	-105.008	-59.6344	-207.424	-29.8172	-197.053	-29.8172	-106.305	55.7452	90.748	-7.7784	-230.759	0	107.601	45.374	28.5208	260.576	23.3352	-7.7784	-133.529	-95.9336	10.3712	357.806	256.687	111.49	-68.7092	45.374	-27.2244	53.1524	53.1524	158.161	72.5984	103.712	58.338	-89.4516	3.8892	178.903	108.898
197	-29.8172	277.43	60.9308	14.2604	70.0056	-92.0444	252.798	-38.892	-67.4128	22.0388	-105.008	-5.1856	-105.008	-59.6344	-207.424	-29.8172	-197.053	-29.8172	-106.305	60.9308	90.748	-7.7784	-230.759	0	107.601	45.374	31.1136	259.28	20.7424	-7.7784	-133.529	-88.1552	0	374.66	256.687	111.49	-72.5984	47.9668	-45.374	42.7812	54.4488	159.457	76.4876	102.416	58.338	-88.1552	2.5928	180.2	107.601
198	-31.1136	276.133	59.6344	14.2604	70.0056	-89.4516	252.798	-38.892	-71.302	22.0388	-106.305	-5.1856	-105.008	-62.2272	-207.424	-29.8172	-198.349	-29.8172	-102.416	63.5236	90.748	-7.7784	-230.759	0	108.898	47.9668	36.2992	260.576	20.7424	-6.482	-128.344	-80.3768	-2.5928	383.734	256.687	110.194	-72.5984	47.9668	-49.2632	42.7812	55.7452	159.457	77.784	101.119	58.338	-88.1552	2.5928	180.2	106.305
199	-31.1136	276.133	57.0416	14.2604	70.0056	-85.5624	252.798	-42.7812	-84.266	25.928	-107.601	-5.1856	-105.008	-62.2272	-207.424	-29.8172	-198.349	-29.8172	-94.6372	63.5236	90.748	-3.8892	-230.759	1.2964	110.194	51.856	51.856	255.391	20.7424	-6.482	-130.936	-80.3768	-2.5928	399.291	248.909	119.269	-72.5984	47.9668	-58.338	37.5956	58.338	162.05	73.8948	99.8228	58.338	-88.1552	-1.2964	185.385	105.008
200	-31.1136	276.133	55.7452	14.2604	71.302	-85.5624	255.391	-45.374	-93.3408	27.2244	-108.898	-5.1856	-105.008	-63.5236	-208.72	-29.8172	-198.349	-29.8172	-92.0444	63.5236	88.1552	-5.1856	-230.759	1.2964	112.787	54.4488	71.302	250.205	19.446	-9.0748	-136.122	-80.3768	-2.5928	416.144	259.28	127.047	-72.5984	47.9668	-67.4128	35.0028	53.1524	155.568	76.4876	99.8228	55.7452	-90.748	-29.8172	230.759	102.416
[truncated: 23 more columns]

## Sheet: 2B - cKO Trajectories
Plotted Trajectories for Figure 2B and Supp Fig 3. Relative X and Relative Y are seen plotted for each trajectory
	Cell 1		Cell 2		Cell 3		Cell 4		Cell 5		Cell 6		Cell 7		Cell 8		Cell 9		Cell 10		Cell 11		Cell 12		Cell 13		Cell 14		Cell 15		Cell 16		Cell 17		Cell 18		Cell 19		Cell 20		Cell 21		Cell 22		Cell 23		Cell 24		Cell 25
Frame	Relative X	Relative Y	Relative X	Relative Y	Relative X	Relative Y	Relative X	Relative Y	Relative X	Relative Y	Relative X	Relative Y	Relative X	Relative Y	Relative X	Relative Y	Relative X	Relative Y	Relative X	Relative Y	Relative X	Relative Y	Relative X	Relative Y	Relative X	Relative Y	Relative X	Relative Y	Relative X	Relative Y	Relative X	Relative Y	Relative X	Relative Y	Relative X	Relative Y	Relative X	Relative Y	Relative X	Relative Y	Relative X	Relative Y	Relative X	Relative Y	Relative X	Relative Y	Relative X	Relative Y	Relative X
1			0	0	0	0	0	0	0	0	0	0	0	0	0	0	0	0	0	0	0	0	0	0	0	0	0	0	0	0	0	0	0	0	0	0	0	0	0	0	0	0	0	0	0	0	0	0	0
2	0	0	1.2964	0	0	1.2964	0	-1.2964	-1.2964	0	2.5928	1.2964	0	0	0	-5.1856	2.5928	-1.2964	3.8892	2.5928	1.2964	1.2964	1.2964	-2.5928	3.8892	-2.5928	0	0	-1.2964	3.8892	14.2604	-5.1856	-10.3712	6.482	-3.8892	5.1856	-1.2964	2.5928	0	1.2964	0	0	1.2964	-5.1856	-2.5928	0	-5.1856	0	1.2964
3	0	1.2964	1.2964	-1.2964	0	2.5928	1.2964	3.8892	-2.5928	1.2964	3.8892	1.2964	-7.7784	-1.2964	3.8892	-11.6676	2.5928	-2.5928	9.0748	2.5928	1.2964	0	1.2964	-2.5928	5.1856	-1.2964	0	0	-2.5928	3.8892	14.2604	-6.482	-20.7424	12.964	-2.5928	1.2964	0	1.2964	0	2.5928	1.2964	-1.2964	7.7784	-10.3712	-5.1856	-1.2964	-3.8892	0	1.2964
4	0	2.5928	2.5928	-1.2964	0	6.482	-1.2964	10.3712	-2.5928	2.5928	11.6676	14.2604	-10.3712	-1.2964	9.0748	-14.2604	5.1856	-5.1856	9.0748	2.5928	1.2964	0	0	-2.5928	7.7784	-2.5928	-2.5928	1.2964	-1.2964	3.8892	12.964	-5.1856	-28.5208	15.5568	0	-2.5928	1.2964	1.2964	0	5.1856	3.8892	-1.2964	19.446	-18.1496	-6.482	-1.2964	-5.1856	2.5928	1.2964
5	0	3.8892	2.5928	-1.2964	1.2964	0	-5.1856	14.2604	-3.8892	2.5928	11.6676	15.5568	-10.3712	-1.2964	10.3712	-16.8532	2.5928	1.2964	14.2604	1.2964	1.2964	0	0	-1.2964	9.0748	-1.2964	-2.5928	0	0	3.8892	12.964	-5.1856	-38.892	15.5568	6.482	-9.0748	1.2964	1.2964	-1.2964	6.482	3.8892	-3.8892	25.928	-24.6316	-7.7784	-1.2964	-7.7784	5.1856	2.5928
6	-1.2964	7.7784	3.8892	-1.2964	0	0	-9.0748	18.1496	-7.7784	5.1856	7.7784	18.1496	-15.5568	-1.2964	2.5928	-24.6316	3.8892	10.3712	18.1496	1.2964	1.2964	0	1.2964	0	9.0748	0	-2.5928	2.5928	2.5928	5.1856	9.0748	6.482	-53.1524	19.446	11.6676	-9.0748	0	3.8892	-1.2964	9.0748	3.8892	-2.5928	28.5208	-24.6316	-5.1856	-1.2964	-12.964	7.7784	3.8892
7	0	9.0748	2.5928	0	-1.2964	2.5928	-16.8532	16.8532	-9.0748	5.1856	6.482	16.8532	-23.3352	1.2964	0	-27.2244	2.5928	16.8532	22.0388	5.1856	1.2964	0	1.2964	0	12.964	-1.2964	-3.8892	2.5928	2.5928	6.482	9.0748	6.482	-66.1164	16.8532	19.446	-12.964	0	3.8892	-1.2964	9.0748	2.5928	0	28.5208	-27.2244	-2.5928	0	-16.8532	6.482	5.1856
8	1.2964	10.3712	2.5928	1.2964	-1.2964	5.1856	-24.6316	28.5208	-12.964	5.1856	6.482	15.5568	-11.6676	2.5928	0	-33.7064	-11.6676	27.2244	27.2244	7.7784	1.2964	0	2.5928	-1.2964	15.5568	-1.2964	-5.1856	2.5928	3.8892	6.482	9.0748	5.1856	-77.784	19.446	23.3352	-19.446	-1.2964	5.1856	0	9.0748	0	3.8892	29.8172	-25.928	-1.2964	1.2964	-36.2992	0	5.1856
9	1.2964	12.964	1.2964	2.5928	0	6.482	-36.2992	32.41	-12.964	6.482	7.7784	12.964	-20.7424	5.1856	0	-40.1884	-14.2604	31.1136	32.41	16.8532	1.2964	0	1.2964	0	19.446	0	-3.8892	2.5928	3.8892	7.7784	12.964	-1.2964	-89.4516	16.8532	28.5208	-31.1136	-1.2964	5.1856	0	10.3712	2.5928	6.482	31.1136	-25.928	0	2.5928	-37.5956	-1.2964	3.8892
10	0	18.1496	1.2964	3.8892	-1.2964	6.482	-40.1884	33.7064	-12.964	5.1856	7.7784	11.6676	-25.928	2.5928	-1.2964	-45.374	-22.0388	27.2244	32.41	16.8532	1.2964	-1.2964	2.5928	1.2964	23.3352	0	-5.1856	3.8892	5.1856	7.7784	12.964	-5.1856	-99.8228	16.8532	29.8172	-41.4848	-1.2964	5.1856	0	10.3712	6.482	7.7784	36.2992	-23.3352	1.2964	2.5928	-38.892	-1.2964	3.8892
11	-2.5928	22.0388	1.2964	6.482	0	9.0748	-28.5208	35.0028	-10.3712	5.1856	9.0748	11.6676	-36.2992	-2.5928	-5.1856	-46.6704	-28.5208	10.3712	24.6316	5.1856	1.2964	-1.2964	3.8892	2.5928	27.2244	-2.5928	-3.8892	7.7784	7.7784	9.0748	12.964	-9.0748	-107.601	15.5568	31.1136	-51.856	-2.5928	6.482	-1.2964	10.3712	11.6676	14.2604	42.7812	-16.8532	2.5928	3.8892	-40.1884	-1.2964	1.2964
12	-3.8892	25.928	0	7.7784	0	7.7784	-31.1136	37.5956	-14.2604	5.1856	9.0748	7.7784	-11.6676	9.0748	-6.482	-50.5596	-28.5208	6.482	27.2244	5.1856	1.2964	-1.2964	3.8892	3.8892	24.6316	1.2964	-6.482	6.482	9.0748	9.0748	14.2604	-9.0748	-120.565	9.0748	33.7064	-66.1164	-2.5928	6.482	-2.5928	10.3712	14.2604	15.5568	57.0416	-14.2604	2.5928	3.8892	-38.892	-1.2964	-2.5928
13	-6.482	31.1136	0	9.0748	-1.2964	7.7784	-29.8172	40.1884	-12.964	5.1856	9.0748	6.482	-11.6676	6.482	-3.8892	-63.5236	-27.2244	3.8892	27.2244	5.1856	1.2964	-1.2964	5.1856	2.5928	23.3352	3.8892	-7.7784	6.482	9.0748	10.3712	14.2604	-1.2964	-137.418	5.1856	32.41	-80.3768	-1.2964	6.482	-3.8892	10.3712	19.446	15.5568	66.1164	-12.964	5.1856	2.5928	-38.892	-2.5928	-6.482
14	-11.6676	36.2992	0	9.0748	-1.2964	7.7784	-32.41	45.374	-11.6676	5.1856	11.6676	6.482	-20.7424	2.5928	-10.3712	-77.784	-27.2244	0	25.928	2.5928	1.2964	-1.2964	5.1856	3.8892	20.7424	5.1856	-6.482	6.482	10.3712	10.3712	16.8532	0	-149.086	2.5928	23.3352	-93.3408	-1.2964	6.482	-5.1856	9.0748	24.6316	12.964	72.5984	-9.0748	5.1856	0	-38.892	-2.5928	-10.3712
15	-11.6676	38.892	0	10.3712	-2.5928	7.7784	-36.2992	49.2632	-9.0748	5.1856	12.964	6.482	-20.7424	2.5928	-15.5568	-88.1552	-22.0388	0	32.41	5.1856	1.2964	-1.2964	6.482	3.8892	19.446	6.482	-6.482	9.0748	10.3712	10.3712	16.8532	0	-158.161	2.5928	16.8532	-103.712	0	6.482	25.928	-1.2964	27.2244	12.964	76.4876	-5.1856	9.0748	-3.8892	-38.892	-1.2964	-14.2604
16	-12.964	45.374	-1.2964	10.3712	-2.5928	7.7784	-37.5956	54.4488	-10.3712	5.1856	14.2604	5.1856	-35.0028	0	-14.2604	-92.0444	-6.482	-6.482	62.2272	23.3352	1.2964	-1.2964	7.7784	5.1856	15.5568	5.1856	-10.3712	7.7784	11.6676	11.6676	16.8532	0	-165.939	-1.2964	6.482	-108.898	0	7.7784	22.0388	-3.8892	29.8172	15.5568	77.784	-2.5928	11.6676	-5.1856	-38.892	2.5928	-15.5568
17	-12.964	49.2632	-1.2964	11.6676	-1.2964	9.0748	-37.5956	60.9308	-10.3712	7.7784	16.8532	5.1856	-35.0028	-2.5928	-15.5568	-95.9336	-2.5928	-10.3712	64.82	23.3352	0	-1.2964	7.7784	5.1856	15.5568	9.0748	-10.3712	9.0748	11.6676	11.6676	18.1496	3.8892	-172.421	-3.8892	1.2964	-112.787	0	9.0748	19.446	-5.1856	33.7064	14.2604	80.3768	-1.2964	15.5568	-5.1856	-38.892	1.2964	-16.8532
18	-12.964	51.856	-2.5928	11.6676	-2.5928	9.0748	-35.0028	66.1164	-9.0748	6.482	20.7424	5.1856	-35.0028	-9.0748	-18.1496	-103.712	-1.2964	-12.964	70.0056	23.3352	1.2964	0	7.7784	6.482	10.3712	9.0748	-11.6676	7.7784	11.6676	10.3712	18.1496	5.1856	-178.903	-2.5928	7.7784	-125.751	0	9.0748	18.1496	-7.7784	32.41	16.8532	82.9696	0	16.8532	-6.482	-37.5956	0	-18.1496
19	-12.964	54.4488	-2.5928	12.964	-3.8892	9.0748	-28.5208	63.5236	-9.0748	6.482	24.6316	3.8892	-36.2992	-18.1496	-22.0388	-108.898	0	-20.7424	76.4876	23.3352	1.2964	0	9.0748	9.0748	1.2964	7.7784	-10.3712	7.7784	11.6676	10.3712	18.1496	7.7784	-187.978	-3.8892	7.7784	-130.936	0	11.6676	16.8532	-11.6676	31.1136	16.8532	82.9696	5.1856	19.446	-7.7784	-36.2992	-1.2964	-18.1496
20	-12.964	58.338	-2.5928	12.964	-1.2964	9.0748	-22.0388	58.338	-7.7784	3.8892	27.2244	3.8892	-5.1856	-5.1856	-23.3352	-115.38	24.6316	-28.5208	50.5596	23.3352	0	0	9.0748	5.1856	-5.1856	1.2964	-11.6676	7.7784	12.964	12.964	19.446	10.3712	-197.053	-3.8892	10.3712	-141.308	0	12.964	15.5568	-12.964	35.0028	22.0388	84.266	6.482	22.0388	-7.7784	-36.2992	-2.5928	-18.1496
21	-11.6676	62.2272	-3.8892	14.2604	-3.8892	9.0748	-15.5568	58.338	-6.482	3.8892	31.1136	3.8892	-1.2964	2.5928	-22.0388	-117.972	27.2244	-28.5208	49.2632	23.3352	0	0	9.0748	5.1856	-10.3712	-5.1856	-11.6676	9.0748	11.6676	12.964	19.446	11.6676	-208.72	-3.8892	7.7784	-152.975	0	15.5568	15.5568	-12.964	36.2992	25.928	84.266	10.3712	20.7424	-9.0748	-36.2992	-5.1856	-18.1496
22	-11.6676	63.5236	-5.1856	14.2604	-3.8892	11.6676	-14.2604	59.6344	-7.7784	7.7784	36.2992	0	-2.5928	2.5928	-24.6316	-123.158	51.856	-22.0388	55.7452	29.8172	0	0	10.3712	5.1856	-20.7424	-7.7784	-11.6676	9.0748	11.6676	14.2604	19.446	11.6676	-219.092	-1.2964	5.1856	-159.457	1.2964	18.1496	15.5568	-14.2604	37.5956	31.1136	85.5624	18.1496	20.7424	-11.6676	-33.7064	-7.7784	-18.1496
23	-12.964	66.1164	-6.482	16.8532	-3.8892	10.3712	-10.3712	57.0416	-11.6676	7.7784	38.892	0	-20.7424	-6.482	-25.928	-124.454	42.7812	-32.41	60.9308	41.4848	0	0	10.3712	5.1856	-27.2244	-7.7784	-11.6676	7.7784	11.6676	14.2604	19.446	11.6676	-229.463	-1.2964	-5.1856	-156.864	1.2964	19.446	16.8532	-14.2604	38.892	40.1884	85.5624	20.7424	19.446	-12.964	-29.8172	-10.3712	-18.1496
24	-12.964	67.4128	-7.7784	22.0388	-1.2964	11.6676	-7.7784	54.4488	-20.7424	6.482	41.4848	1.2964	-36.2992	-12.964	-27.2244	-121.862	31.1136	-47.9668	57.0416	42.7812	0	0	10.3712	5.1856	-32.41	-9.0748	-11.6676	7.7784	11.6676	14.2604	19.446	11.6676	-235.945	0	-3.8892	-164.643	3.8892	22.0388	15.5568	-16.8532	45.374	47.9668	85.5624	22.0388	20.7424	-11.6676	-25.928	-12.964	-20.7424
25	-12.964	68.7092	-9.0748	23.3352	-1.2964	12.964	-7.7784	54.4488	-24.6316	5.1856	44.0776	2.5928	-45.374	-20.7424	-29.8172	-123.158	32.41	-60.9308	49.2632	42.7812	0	1.2964	11.6676	5.1856	-37.5956	-11.6676	-12.964	6.482	12.964	15.5568	19.446	11.6676	-243.723	0	-5.1856	-172.421	3.8892	24.6316	10.3712	-22.0388	57.0416	53.1524	86.8588	23.3352	27.2244	-7.7784	-23.3352	-14.2604	-20.7424
26	-10.3712	70.0056	-9.0748	25.928	1.2964	15.5568	-10.3712	54.4488	-28.5208	3.8892	49.2632	2.5928	-50.5596	-25.928	-27.2244	-124.454	32.41	-71.302	40.1884	31.1136	-1.2964	2.5928	11.6676	6.482	-41.4848	-18.1496	-15.5568	5.1856	12.964	16.8532	23.3352	10.3712	-250.205	0	-7.7784	-180.2	2.5928	27.2244	7.7784	-24.6316	86.8588	72.5984	86.8588	28.5208	32.41	-3.8892	-20.7424	-14.2604	-23.3352
27	-10.3712	70.0056	-7.7784	29.8172	1.2964	15.5568	-18.1496	53.1524	-31.1136	3.8892	47.9668	7.7784	-50.5596	-25.928	-27.2244	-124.454	14.2604	-81.6732	28.5208	-3.8892	-1.2964	1.2964	14.2604	5.1856	-47.9668	-20.7424	-15.5568	5.1856	14.2604	16.8532	24.6316	6.482	-261.873	2.5928	-3.8892	-190.571	2.5928	28.5208	3.8892	-25.928	85.5624	66.1164	88.1552	29.8172	36.2992	-1.2964	-18.1496	-15.5568	-23.3352
28	-11.6676	70.0056	-9.0748	31.1136	-1.2964	16.8532	-18.1496	37.5956	-35.0028	5.1856	53.1524	6.482	-68.7092	-29.8172	-28.5208	-117.972	-2.5928	-62.2272	33.7064	-1.2964	-1.2964	1.2964	14.2604	6.482	-50.5596	-24.6316	-10.3712	9.0748	14.2604	16.8532	25.928	3.8892	-273.54	3.8892	-1.2964	-203.535	1.2964	31.1136	2.5928	-25.928	81.6732	66.1164	88.1552	29.8172	36.2992	-1.2964	-15.5568	-15.5568	-25.928
29	-10.3712	70.0056	-7.7784	36.2992	-2.5928	11.6676	22.0388	40.1884	-36.2992	6.482	55.7452	7.7784	-68.7092	-29.8172	-32.41	-115.38	-6.482	-55.7452	33.7064	0	-1.2964	3.8892	15.5568	6.482	-53.1524	-24.6316	-11.6676	7.7784	15.5568	16.8532	25.928	-1.2964	-286.504	3.8892	3.8892	-217.795	0	32.41	3.8892	-27.2244	86.8588	62.2272	86.8588	29.8172	35.0028	-1.2964	-12.964	-15.5568	-28.5208
30	-11.6676	70.0056	-6.482	37.5956	-2.5928	16.8532	15.5568	49.2632	-36.2992	10.3712	59.6344	3.8892	-68.7092	-29.8172	-36.2992	-115.38	-7.7784	-44.0776	36.2992	1.2964	-1.2964	1.2964	15.5568	6.482	-53.1524	-25.928	-14.2604	6.482	15.5568	16.8532	25.928	-1.2964	-303.358	5.1856	6.482	-235.945	-2.5928	35.0028	5.1856	-28.5208	94.6372	62.2272	86.8588	31.1136	36.2992	-1.2964	-9.0748	-12.964	-31.1136
31	-10.3712	72.5984	-5.1856	38.892	-2.5928	16.8532	10.3712	53.1524	-37.5956	10.3712	63.5236	2.5928	-68.7092	-29.8172	-36.2992	-120.565	-11.6676	-42.7812	37.5956	-1.2964	1.2964	-2.5928	15.5568	7.7784	-54.4488	-24.6316	-12.964	9.0748	16.8532	16.8532	25.928	-2.5928	-318.914	7.7784	6.482	-245.02	-5.1856	37.5956	5.1856	-27.2244	101.119	63.5236	88.1552	32.41	37.5956	1.2964	-6.482	-10.3712	-32.41
32	-10.3712	72.5984	-1.2964	42.7812	-2.5928	15.5568	3.8892	62.2272	-38.892	9.0748	68.7092	0	-75.1912	-32.41	-33.7064	-127.047	-18.1496	-42.7812	33.7064	-1.2964	29.8172	-22.0388	15.5568	7.7784	-55.7452	-23.3352	-14.2604	6.482	18.1496	15.5568	25.928	-6.482	-338.36	7.7784	-1.2964	-254.094	-11.6676	40.1884	6.482	-27.2244	110.194	67.4128	89.4516	32.41	37.5956	2.5928	-2.5928	-9.0748	-35.0028
33	-11.6676	73.8948	0	41.4848	1.2964	14.2604	29.8172	67.4128	-37.5956	3.8892	71.302	1.2964	-86.8588	-40.1884	-33.7064	-130.936	7.7784	-42.7812	27.2244	-1.2964	27.2244	-19.446	16.8532	9.0748	-55.7452	-23.3352	-15.5568	6.482	19.446	14.2604	29.8172	-10.3712	-352.621	3.8892	-6.482	-261.873	-19.446	41.4848	9.0748	-25.928	116.676	70.0056	89.4516	31.1136	36.2992	3.8892	1.2964	-5.1856	-35.0028
34	-11.6676	73.8948	2.5928	45.374	2.5928	12.964	32.41	68.7092	-37.5956	1.2964	75.1912	2.5928	-86.8588	-40.1884	-35.0028	-133.529	12.964	-45.374	25.928	-3.8892	27.2244	-19.446	16.8532	9.0748	-54.4488	-22.0388	-15.5568	5.1856	18.1496	14.2604	29.8172	-10.3712	-362.992	6.482	-10.3712	-267.058	-24.6316	46.6704	11.6676	-25.928	121.862	72.5984	90.748	31.1136	36.2992	6.482	3.8892	2.5928	-37.5956
35	-12.964	73.8948	3.8892	45.374	1.2964	11.6676	20.7424	47.9668	-40.1884	-7.7784	79.0804	3.8892	-84.266	-40.1884	-37.5956	-138.715	5.1856	-47.9668	24.6316	-3.8892	28.5208	-20.7424	16.8532	9.0748	-53.1524	-22.0388	-16.8532	3.8892	18.1496	14.2604	31.1136	-10.3712	-373.363	15.5568	-3.8892	-278.726	-25.928	50.5596	11.6676	-25.928	124.454	57.0416	90.748	29.8172	37.5956	5.1856	3.8892	9.0748	-40.1884
36	-14.2604	75.1912	6.482	46.6704	0	12.964	20.7424	47.9668	-42.7812	-12.964	82.9696	7.7784	-84.266	-40.1884	-44.0776	-141.308	-9.0748	-47.9668	22.0388	1.2964	28.5208	-20.7424	18.1496	11.6676	-54.4488	-20.7424	-16.8532	2.5928	18.1496	14.2604	31.1136	-10.3712	-382.438	16.8532	6.482	-295.579	-27.2244	53.1524	12.964	-24.6316	128.344	57.0416	90.748	31.1136	38.892	7.7784	0	19.446	-44.0776
37	-14.2604	75.1912	7.7784	44.0776	-2.5928	12.964	22.0388	49.2632	-44.0776	-12.964	85.5624	11.6676	-82.9696	-40.1884	-46.6704	-146.493	-14.2604	-40.1884	24.6316	16.8532	28.5208	-20.7424	16.8532	9.0748	-55.7452	-20.7424	-15.5568	5.1856	18.1496	14.2604	38.892	-5.1856	-388.92	16.8532	18.1496	-304.654	-27.2244	54.4488	14.2604	-25.928	134.826	62.2272	92.0444	31.1136	38.892	9.0748	-5.1856	27.2244	-50.5596
38	-14.2604	76.4876	6.482	45.374	-1.2964	14.2604	22.0388	46.6704	-42.7812	-14.2604	88.1552	12.964	-81.6732	-38.892	-46.6704	-150.382	-11.6676	-40.1884	27.2244	24.6316	28.5208	-22.0388	15.5568	10.3712	-54.4488	-22.0388	-16.8532	3.8892	19.446	15.5568	40.1884	-3.8892	-400.588	16.8532	28.5208	-312.432	-28.5208	54.4488	14.2604	-27.2244	140.011	53.1524	93.3408	33.7064	38.892	10.3712	-11.6676	31.1136	-55.7452
39	-15.5568	76.4876	7.7784	46.6704	-1.2964	12.964	23.3352	46.6704	-42.7812	-16.8532	92.0444	12.964	-79.0804	-38.892	-45.374	-156.864	10.3712	-40.1884	27.2244	24.6316	28.5208	-20.7424	16.8532	10.3712	-53.1524	-20.7424	-20.7424	0	19.446	15.5568	41.4848	-3.8892	-412.255	12.964	33.7064	-320.211	-32.41	53.1524	16.8532	-27.2244	145.197	59.6344	94.6372	36.2992	37.5956	12.964	-18.1496	35.0028	-57.0416
40	-15.5568	76.4876	9.0748	46.6704	3.8892	15.5568	23.3352	46.6704	-44.0776	-18.1496	98.5264	9.0748	-79.0804	-38.892	-47.9668	-159.457	5.1856	-37.5956	27.2244	24.6316	28.5208	-20.7424	15.5568	11.6676	-51.856	-18.1496	-23.3352	-2.5928	20.7424	15.5568	46.6704	-3.8892	-423.923	10.3712	44.0776	-331.878	-33.7064	53.1524	19.446	-29.8172	151.679	67.4128	94.6372	36.2992	37.5956	15.5568	-23.3352	35.0028	-60.9308
41	-16.8532	77.784	7.7784	50.5596	2.5928	18.1496	20.7424	49.2632	-47.9668	-18.1496	102.416	10.3712	-79.0804	-40.1884	-51.856	-163.346	-2.5928	-33.7064	25.928	25.928	31.1136	-50.5596	15.5568	11.6676	-54.4488	-18.1496	-25.928	-5.1856	22.0388	16.8532	46.6704	-3.8892	-436.887	5.1856	62.2272	-340.953	-36.2992	53.1524	20.7424	-29.8172	158.161	70.0056	95.9336	40.1884	36.2992	15.5568	-28.5208	36.2992	-63.5236
42	-15.5568	76.4876	10.3712	50.5596	-1.2964	18.1496	20.7424	46.6704	-47.9668	-19.446	108.898	1.2964	-79.0804	-40.1884	-57.0416	-162.05	-1.2964	-24.6316	18.1496	25.928	16.8532	-72.5984	15.5568	11.6676	-54.4488	-16.8532	-27.2244	-6.482	23.3352	18.1496	46.6704	-9.0748	-445.962	0	75.1912	-344.842	-38.892	54.4488	23.3352	-32.41	164.643	72.5984	97.23	38.892	37.5956	12.964	-33.7064	37.5956	-63.5236
43	-16.8532	77.784	11.6676	50.5596	1.2964	15.5568	18.1496	47.9668	-49.2632	-16.8532	116.676	-9.0748	-79.0804	-40.1884	-62.2272	-158.161	-1.2964	-22.0388	9.0748	25.928	18.1496	-76.4876	14.2604	11.6676	-54.4488	-15.5568	-28.5208	-6.482	23.3352	18.1496	46.6704	-25.928	-456.333	1.2964	85.5624	-346.139	-41.4848	53.1524	25.928	-32.41	171.125	76.4876	98.5264	37.5956	38.892	12.964	-38.892	36.2992	-63.5236
44	-16.8532	77.784	11.6676	50.5596	1.2964	16.8532	16.8532	49.2632	-49.2632	-14.2604	121.862	2.5928	-79.0804	-40.1884	-64.82	-155.568	-9.0748	-12.964	6.482	25.928	27.2244	-121.862	14.2604	11.6676	-54.4488	-15.5568	-27.2244	-9.0748	24.6316	18.1496	46.6704	-35.0028	-468	2.5928	89.4516	-340.953	-45.374	51.856	28.5208	-35.0028	177.607	102.416	99.8228	36.2992	38.892	14.2604	-45.374	36.2992	-63.5236
45	-16.8532	77.784	12.964	51.856	1.2964	15.5568	50.5596	59.6344	-49.2632	-14.2604	117.972	19.446	-79.0804	-40.1884	-68.7092	-156.864	-49.2632	19.446	2.5928	28.5208	6.482	-82.9696	15.5568	12.964	-54.4488	-15.5568	-28.5208	-10.3712	25.928	16.8532	46.6704	-41.4848	-478.372	0	89.4516	-338.36	-47.9668	51.856	31.1136	-37.5956	186.682	115.38	99.8228	36.2992	38.892	19.446	-51.856	33.7064	-63.5236
46	-20.7424	81.6732	16.8532	53.1524	1.2964	15.5568	50.5596	57.0416	-47.9668	-25.928	121.862	18.1496	-79.0804	-40.1884	-73.8948	-155.568	-50.5596	22.0388	1.2964	32.41	5.1856	-84.266	14.2604	11.6676	-54.4488	-12.964	-25.928	-9.0748	27.2244	16.8532	46.6704	-46.6704	-484.854	-6.482	94.6372	-329.286	-49.2632	51.856	36.2992	-42.7812	193.164	123.158	101.119	36.2992	37.5956	20.7424	-57.0416	32.41	-62.2272
47	-22.0388	81.6732	15.5568	57.0416	0	14.2604	51.856	57.0416	-46.6704	-28.5208	127.047	16.8532	-79.0804	-40.1884	-76.4876	-156.864	-51.856	31.1136	0	35.0028	11.6676	-81.6732	15.5568	10.3712	-54.4488	-10.3712	-29.8172	-9.0748	27.2244	18.1496	46.6704	-55.7452	-493.928	-7.7784	92.0444	-303.358	-47.9668	51.856	41.4848	-50.5596	197.053	133.529	101.119	37.5956	35.0028	18.1496	-60.9308	31.1136	-62.2272
48	-22.0388	81.6732	16.8532	55.7452	-2.5928	18.1496	51.856	59.6344	-86.8588	-55.7452	130.936	16.8532	-79.0804	-40.1884	-79.0804	-158.161	-54.4488	42.7812	-3.8892	31.1136	7.7784	-85.5624	14.2604	11.6676	-53.1524	-10.3712	-31.1136	-10.3712	28.5208	18.1496	44.0776	-59.6344	-500.41	-11.6676	89.4516	-300.765	-49.2632	51.856	41.4848	-54.4488	197.053	140.011	102.416	37.5956	33.7064	15.5568	-64.82	29.8172	-64.82
49	-22.0388	81.6732	18.1496	53.1524	0	18.1496	66.1164	45.374	-128.344	-37.5956	136.122	18.1496	-79.0804	-45.374	-82.9696	-160.754	-54.4488	50.5596	2.5928	32.41	-18.1496	-95.9336	14.2604	11.6676	-51.856	-9.0748	-32.41	-12.964	27.2244	19.446	46.6704	-36.2992	-510.782	-12.964	106.305	-282.615	-51.856	54.4488	44.0776	-58.338	193.164	142.604	102.416	37.5956	31.1136	11.6676	-66.1164	28.5208	-64.82
50	-23.3352	82.9696	18.1496	57.0416	5.1856	15.5568	107.601	60.9308	-141.308	-57.0416	140.011	19.446	-79.0804	-47.9668	-86.8588	-167.236	-44.0776	59.6344	3.8892	40.1884	-24.6316	-99.8228	15.5568	11.6676	-51.856	-9.0748	-37.5956	-14.2604	25.928	20.7424	46.6704	-31.1136	-517.264	-20.7424	111.49	-278.726	-53.1524	54.4488	45.374	-63.5236	199.646	150.382	103.712	38.892	28.5208	7.7784	-68.7092	27.2244	-66.1164
51	-27.2244	86.8588	20.7424	55.7452	5.1856	15.5568	63.5236	16.8532	-138.715	-58.338	143.9	18.1496	-81.6732	-53.1524	-92.0444	-172.421	-54.4488	70.0056	1.2964	44.0776	-25.928	-101.119	16.8532	12.964	-51.856	-7.7784	-38.892	-15.5568	25.928	20.7424	46.6704	-24.6316	-521.153	-27.2244	117.972	-270.948	-53.1524	55.7452	47.9668	-66.1164	197.053	156.864	103.712	42.7812	25.928	3.8892	-70.0056	25.928	-67.4128
52	-28.5208	86.8588	22.0388	54.4488	5.1856	14.2604	25.928	44.0776	-140.011	-57.0416	147.79	20.7424	-105.008	-64.82	-102.416	-178.903	-77.784	63.5236	-2.5928	50.5596	-27.2244	-102.416	16.8532	14.2604	-50.5596	-6.482	-44.0776	-18.1496	24.6316	23.3352	46.6704	-22.0388	-528.931	-29.8172	125.751	-267.058	-54.4488	57.0416	49.2632	-70.0056	199.646	164.643	105.008	41.4848	24.6316	-2.5928	-71.302	24.6316	-67.4128
53	-28.5208	86.8588	22.0388	55.7452	3.8892	14.2604	27.2244	49.2632	-140.011	-60.9308	151.679	20.7424	-107.601	-66.1164	-112.787	-182.792	-80.3768	59.6344	-2.5928	50.5596	-25.928	-102.416	16.8532	15.5568	-50.5596	-7.7784	-51.856	-23.3352	25.928	23.3352	42.7812	-19.446	-538.006	-36.2992	136.122	-268.355	-54.4488	57.0416	50.5596	-73.8948	200.942	169.828	106.305	40.1884	23.3352	-9.0748	-72.5984	23.3352	-70.0056
54	-28.5208	85.5624	23.3352	55.7452	2.5928	12.964	37.5956	54.4488	-142.604	-63.5236	155.568	18.1496	-115.38	-73.8948	-120.565	-187.978	-73.8948	53.1524	9.0748	49.2632	-24.6316	-102.416	18.1496	15.5568	-50.5596	-6.482	-58.338	-27.2244	25.928	22.0388	41.4848	-16.8532	-545.784	-44.0776	149.086	-280.022	-57.0416	58.338	51.856	-77.784	197.053	175.014	107.601	41.4848	23.3352	-10.3712	-73.8948	23.3352	-71.302
55	-28.5208	85.5624	24.6316	54.4488	3.8892	12.964	45.374	53.1524	-147.79	-64.82	158.161	14.2604	-115.38	-73.8948	-123.158	-200.942	-66.1164	46.6704	18.1496	44.0776	-24.6316	-102.416	18.1496	16.8532	-50.5596	-6.482	-64.82	-29.8172	24.6316	22.0388	41.4848	-14.2604	-553.563	-49.2632	156.864	-292.986	-58.338	57.0416	51.856	-81.6732	180.2	167.236	108.898	41.4848	20.7424	-10.3712	-73.8948	22.0388	-71.302
56	-31.1136	89.4516	25.928	50.5596	3.8892	16.8532	44.0776	59.6344	-151.679	-64.82	160.754	16.8532	-105.008	-79.0804	-123.158	-208.72	-57.0416	38.892	18.1496	41.4848	-24.6316	-101.119	18.1496	18.1496	-50.5596	-5.1856	-73.8948	-36.2992	25.928	22.0388	37.5956	-16.8532	-563.934	-55.7452	156.864	-305.95	-59.6344	58.338	51.856	-84.266	164.643	168.532	110.194	42.7812	18.1496	-12.964	-73.8948	23.3352	-72.5984
57	-29.8172	88.1552	28.5208	50.5596	2.5928	18.1496	44.0776	60.9308	-152.975	-66.1164	162.05	14.2604	-107.601	-88.1552	-117.972	-219.092	-57.0416	36.2992	7.7784	36.2992	-24.6316	-102.416	18.1496	19.446	-51.856	-5.1856	-84.266	-40.1884	24.6316	23.3352	37.5956	-18.1496	-582.084	-57.0416	150.382	-316.322	-60.9308	59.6344	53.1524	-86.8588	143.9	150.382	110.194	45.374	15.5568	-16.8532	-73.8948	22.0388	-73.8948
58	-31.1136	89.4516	29.8172	50.5596	1.2964	16.8532	44.0776	64.82	-152.975	-68.7092	160.754	14.2604	-108.898	-89.4516	-115.38	-226.87	-57.0416	36.2992	7.7784	31.1136	-25.928	-103.712	19.446	18.1496	-51.856	-5.1856	-97.23	-37.5956	24.6316	23.3352	33.7064	-19.446	-596.344	-58.338	141.308	-327.989	-60.9308	58.338	53.1524	-89.4516	145.197	132.233	111.49	46.6704	16.8532	-18.1496	-71.302	19.446	-72.5984
59	-31.1136	89.4516	29.8172	50.5596	2.5928	18.1496	44.0776	66.1164	-151.679	-71.302	156.864	12.964	-111.49	-89.4516	-114.083	-234.648	-63.5236	28.5208	7.7784	29.8172	-25.928	-105.008	19.446	19.446	-51.856	-5.1856	-101.119	-50.5596	24.6316	24.6316	32.41	-18.1496	-604.122	-70.0056	137.418	-337.064	-62.2272	58.338	54.4488	-92.0444	146.493	130.936	114.083	46.6704	16.8532	-20.7424	-68.7092	18.1496	-71.302
60	-31.1136	89.4516	23.3352	53.1524	2.5928	18.1496	42.7812	66.1164	-156.864	-63.5236	158.161	10.3712	-107.601	-95.9336	-111.49	-242.427	-63.5236	28.5208	0	20.7424	-25.928	-103.712	19.446	19.446	-53.1524	-5.1856	-108.898	-49.2632	24.6316	24.6316	32.41	-19.446	-610.604	-79.0804	117.972	-340.953	-62.2272	57.0416	55.7452	-94.6372	147.79	127.047	115.38	47.9668	18.1496	-19.446	-66.1164	16.8532	-71.302
61	-32.41	90.748	25.928	57.0416	3.8892	18.1496	47.9668	63.5236	-163.346	-53.1524	158.161	7.7784	-106.305	-98.5264	-108.898	-246.316	-68.7092	22.0388	-10.3712	19.446	-27.2244	-102.416	20.7424	22.0388	-55.7452	-6.482	-114.083	-51.856	23.3352	27.2244	14.2604	-37.5956	-618.383	-86.8588	105.008	-330.582	-62.2272	58.338	57.0416	-95.9336	147.79	125.751	116.676	49.2632	19.446	-19.446	-64.82	18.1496	-71.302
62	-33.7064	92.0444	20.7424	53.1524	3.8892	18.1496	47.9668	62.2272	-168.532	-70.0056	160.754	5.1856	-119.269	-116.676	-106.305	-252.798	-67.4128	19.446	-14.2604	19.446	-27.2244	-102.416	20.7424	22.0388	-55.7452	-7.7784	-115.38	-57.0416	23.3352	27.2244	14.2604	-37.5956	-623.568	-99.8228	95.9336	-317.618	-63.5236	57.0416	58.338	-99.8228	149.086	124.454	117.972	50.5596	19.446	-18.1496	-62.2272	19.446	-72.5984
63	-33.7064	92.0444	20.7424	53.1524	2.5928	19.446	47.9668	62.2272	-176.31	-71.302	159.457	1.2964	-93.3408	-108.898	-105.008	-260.576	-44.0776	19.446	-15.5568	19.446	-25.928	-102.416	19.446	22.0388	-55.7452	-9.0748	-108.898	-75.1912	24.6316	27.2244	14.2604	-44.0776	-630.05	-108.898	92.0444	-307.247	-64.82	55.7452	58.338	-102.416	150.382	125.751	121.862	53.1524	19.446	-18.1496	-62.2272	20.7424	-70.0056
64	-33.7064	90.748	22.0388	53.1524	2.5928	20.7424	40.1884	68.7092	-181.496	-67.4128	158.161	-2.5928	-93.3408	-112.787	-108.898	-267.058	-44.0776	14.2604	-15.5568	18.1496	-25.928	-103.712	20.7424	22.0388	-55.7452	-10.3712	-116.676	-66.1164	22.0388	28.5208	16.8532	-53.1524	-635.236	-119.269	90.748	-292.986	-66.1164	55.7452	60.9308	-103.712	151.679	133.529	124.454	53.1524	16.8532	-20.7424	-60.9308	22.0388	-68.7092
65	-35.0028	92.0444	22.0388	53.1524	0	18.1496	35.0028	71.302	-184.089	-68.7092	155.568	-3.8892	-95.9336	-119.269	-106.305	-276.133	-46.6704	1.2964	-11.6676	18.1496	-27.2244	-105.008	22.0388	23.3352	-55.7452	-11.6676	-119.269	-66.1164	22.0388	28.5208	29.8172	-66.1164	-636.532	-132.233	93.3408	-282.615	-66.1164	55.7452	62.2272	-106.305	154.272	132.233	127.047	53.1524	19.446	-16.8532	-64.82	25.928	-66.1164
66	-36.2992	94.6372	20.7424	55.7452	-1.2964	19.446	35.0028	72.5984	-186.682	-72.5984	159.457	-5.1856	-92.0444	-121.862	-105.008	-285.208	-54.4488	-20.7424	-3.8892	18.1496	-29.8172	-101.119	20.7424	25.928	-55.7452	-12.964	-121.862	-68.7092	20.7424	31.1136	29.8172	-75.1912	-643.014	-137.418	102.416	-274.837	-66.1164	57.0416	63.5236	-107.601	155.568	134.826	129.64	57.0416	23.3352	-15.5568	-67.4128	29.8172	-60.9308
67	-35.0028	93.3408	20.7424	53.1524	-3.8892	22.0388	35.0028	72.5984	-189.274	-75.1912	160.754	-7.7784	-88.1552	-121.862	-106.305	-294.283	-55.7452	-37.5956	-5.1856	16.8532	-28.5208	-101.119	22.0388	27.2244	-55.7452	-12.964	-124.454	-70.0056	20.7424	32.41	29.8172	-75.1912	-643.014	-141.308	114.083	-270.948	-66.1164	57.0416	64.82	-110.194	156.864	138.715	132.233	57.0416	24.6316	-16.8532	-70.0056	31.1136	-60.9308
68	-36.2992	94.6372	19.446	51.856	-3.8892	23.3352	35.0028	70.0056	-191.867	-79.0804	160.754	-7.7784	-88.1552	-114.083	-107.601	-303.358	-62.2272	-49.2632	-7.7784	14.2604	-29.8172	-103.712	23.3352	27.2244	-55.7452	-12.964	-127.047	-73.8948	19.446	35.0028	35.0028	-70.0056	-641.718	-143.9	128.344	-280.022	-67.4128	57.0416	66.1164	-112.787	158.161	141.308	133.529	58.338	25.928	-18.1496	-72.5984	32.41	-62.2272
69	-36.2992	95.9336	23.3352	49.2632	-5.1856	22.0388	23.3352	79.0804	-194.46	-82.9696	160.754	-9.0748	-90.748	-114.083	-110.194	-311.136	-71.302	-54.4488	-10.3712	14.2604	-31.1136	-103.712	23.3352	29.8172	-54.4488	-12.964	-129.64	-72.5984	18.1496	36.2992	35.0028	-67.4128	-639.125	-147.79	132.233	-290.394	-67.4128	58.338	66.1164	-115.38	160.754	142.604	136.122	59.6344	28.5208	-19.446	-75.1912	33.7064	-63.5236
70	-36.2992	95.9336	22.0388	51.856	-1.2964	24.6316	24.6316	79.0804	-197.053	-86.8588	162.05	-10.3712	-93.3408	-111.49	-108.898	-317.618	-71.302	-54.4488	-10.3712	18.1496	-29.8172	-107.601	25.928	29.8172	-53.1524	-15.5568	-130.936	-72.5984	19.446	36.2992	41.4848	-67.4128	-635.236	-152.975	133.529	-307.247	-67.4128	57.0416	66.1164	-117.972	164.643	141.308	138.715	64.82	28.5208	-19.446	-77.784	33.7064	-62.2272
71	-36.2992	97.23	22.0388	53.1524	0	28.5208	24.6316	77.784	-194.46	-92.0444	160.754	-10.3712	-95.9336	-110.194	-107.601	-321.507	-58.338	-59.6344	2.5928	25.928	-29.8172	-107.601	24.6316	31.1136	-50.5596	-15.5568	-134.826	-71.302	18.1496	35.0028	37.5956	-73.8948	-633.94	-159.457	129.64	-315.025	-67.4128	58.338	66.1164	-119.269	169.828	142.604	142.604	71.302	29.8172	-19.446	-80.3768	33.7064	-60.9308
72	-36.2992	97.23	22.0388	50.5596	1.2964	29.8172	20.7424	75.1912	-194.46	-92.0444	160.754	-12.964	-93.3408	-110.194	-108.898	-324.1	-50.5596	-60.9308	2.5928	20.7424	-31.1136	-108.898	25.928	32.41	-47.9668	-16.8532	-140.011	-68.7092	16.8532	35.0028	2.5928	-84.266	-626.161	-168.532	121.862	-321.507	-68.7092	59.6344	66.1164	-121.862	173.718	142.604	143.9	79.0804	32.41	-22.0388	-84.266	31.1136	-59.6344
73	-36.2992	97.23	23.3352	50.5596	0	31.1136	15.5568	76.4876	-187.978	-98.5264	159.457	-15.5568	-93.3408	-111.49	-111.49	-326.693	-45.374	-64.82	10.3712	23.3352	-29.8172	-108.898	27.2244	35.0028	-46.6704	-16.8532	-145.197	-70.0056	15.5568	36.2992	-19.446	-84.266	-630.05	-173.718	114.083	-327.989	-68.7092	59.6344	67.4128	-123.158	175.014	143.9	145.197	85.5624	35.0028	-20.7424	-85.5624	29.8172	-58.338
74	-36.2992	97.23	23.3352	51.856	-1.2964	31.1136	14.2604	77.784	-184.089	-108.898	159.457	-18.1496	-95.9336	-111.49	-115.38	-331.878	-29.8172	-66.1164	15.5568	24.6316	-31.1136	-111.49	31.1136	37.5956	-45.374	-16.8532	-149.086	-75.1912	16.8532	35.0028	-15.5568	-85.5624	-632.643	-190.571	99.8228	-322.804	-68.7092	59.6344	67.4128	-125.751	173.718	150.382	147.79	84.266	36.2992	-16.8532	-85.5624	28.5208	-57.0416
75	-36.2992	97.23	23.3352	51.856	-1.2964	32.41	9.0748	86.8588	-184.089	-115.38	158.161	-19.446	-98.5264	-111.49	-105.008	-333.175	-24.6316	-67.4128	15.5568	31.1136	-32.41	-111.49	32.41	40.1884	-42.7812	-16.8532	-152.975	-76.4876	15.5568	36.2992	-33.7064	-88.1552	-643.014	-203.535	90.748	-324.1	-68.7092	59.6344	67.4128	-128.344	173.718	154.272	151.679	92.0444	33.7064	-9.0748	-85.5624	28.5208	-58.338
76	-36.2992	99.8228	23.3352	53.1524	-2.5928	33.7064	7.7784	95.9336	-184.089	-115.38	158.161	-20.7424	-101.119	-111.49	-107.601	-334.471	-32.41	-71.302	14.2604	32.41	-32.41	-111.49	33.7064	42.7812	-41.4848	-14.2604	-156.864	-73.8948	14.2604	36.2992	-33.7064	-90.748	-648.2	-212.61	81.6732	-316.322	-68.7092	62.2272	68.7092	-129.64	178.903	151.679	162.05	121.862	31.1136	-6.482	-85.5624	28.5208	-58.338
77	-36.2992	99.8228	23.3352	51.856	-3.8892	35.0028	7.7784	102.416	-187.978	-115.38	158.161	-24.6316	-105.008	-110.194	-107.601	-337.064	-40.1884	-76.4876	12.964	35.0028	-31.1136	-111.49	33.7064	44.0776	-38.892	-12.964	-160.754	-71.302	14.2604	36.2992	-33.7064	-93.3408	-652.089	-226.87	76.4876	-305.95	-68.7092	62.2272	68.7092	-132.233	171.125	147.79	168.532	127.047	36.2992	-10.3712	-85.5624	27.2244	-58.338
78	-36.2992	101.119	23.3352	51.856	-3.8892	33.7064	9.0748	107.601	-193.164	-115.38	156.864	-28.5208	-107.601	-108.898	-110.194	-337.064	-44.0776	-76.4876	15.5568	32.41	-32.41	-111.49	35.0028	44.0776	-37.5956	-11.6676	-163.346	-70.0056	14.2604	35.0028	-38.892	-102.416	-658.571	-234.648	72.5984	-292.986	-68.7092	62.2272	70.0056	-134.826	175.014	140.011	167.236	137.418	40.1884	-11.6676	-85.5624	27.2244	-58.338
79	-36.2992	102.416	23.3352	50.5596	-3.8892	36.2992	7.7784	110.194	-197.053	-112.787	154.272	-29.8172	-111.49	-106.305	-103.712	-337.064	-44.0776	-81.6732	12.964	36.2992	-33.7064	-112.787	36.2992	44.0776	-36.2992	-10.3712	-167.236	-67.4128	14.2604	33.7064	-38.892	-103.712	-663.757	-239.834	73.8948	-285.208	-68.7092	62.2272	71.302	-136.122	181.496	133.529	171.125	146.493	41.4848	-9.0748	-84.266	28.5208	-58.338
80	-36.2992	102.416	23.3352	50.5596	-3.8892	37.5956	6.482	110.194	-198.349	-107.601	151.679	-33.7064	-111.49	-106.305	-98.5264	-342.25	-33.7064	-81.6732	10.3712	40.1884	-33.7064	-114.083	36.2992	45.374	-36.2992	-10.3712	-169.828	-66.1164	14.2604	32.41	-35.0028	-103.712	-671.535	-243.723	82.9696	-280.022	-70.0056	62.2272	71.302	-137.418	185.385	128.344	177.607	149.086	40.1884	-5.1856	-81.6732	28.5208	-58.338
81	-37.5956	106.305	23.3352	51.856	-5.1856	36.2992	11.6676	114.083	-198.349	-108.898	147.79	-35.0028	-112.787	-103.712	-98.5264	-343.546	-22.0388	-72.5984	10.3712	40.1884	-33.7064	-112.787	37.5956	46.6704	-36.2992	-9.0748	-171.125	-64.82	15.5568	32.41	-38.892	-107.601	-681.906	-247.612	102.416	-278.726	-70.0056	64.82	72.5984	-137.418	185.385	127.047	180.2	155.568	38.892	-10.3712	-79.0804	31.1136	-59.6344
82	-36.2992	106.305	23.3352	53.1524	-2.5928	40.1884	18.1496	116.676	-198.349	-106.305	146.493	-38.892	-127.047	-103.712	-99.8228	-343.546	-22.0388	-71.302	18.1496	29.8172	-33.7064	-112.787	37.5956	49.2632	-36.2992	-7.7784	-172.421	-66.1164	14.2604	32.41	-38.892	-108.898	-693.574	-252.798	115.38	-291.69	-71.302	64.82	72.5984	-138.715	182.792	124.454	186.682	163.346	33.7064	-12.964	-76.4876	31.1136	-58.338
83	-37.5956	107.601	22.0388	51.856	-1.2964	40.1884	15.5568	108.898	-197.053	-110.194	145.197	-45.374	-129.64	-102.416	-101.119	-344.842	-23.3352	-71.302	18.1496	29.8172	-33.7064	-115.38	33.7064	47.9668	-35.0028	-7.7784	-172.421	-66.1164	14.2604	31.1136	-40.1884	-110.194	-705.242	-260.576	123.158	-303.358	-71.302	66.1164	71.302	-138.715	173.718	123.158	190.571	171.125	31.1136	-15.5568	-75.1912	33.7064	-58.338
84	-37.5956	107.601	23.3352	50.5596	-2.5928	38.892	14.2604	107.601	-195.756	-115.38	143.9	-49.2632	-134.826	-98.5264	-97.23	-355.214	-27.2244	-71.302	15.5568	23.3352	-35.0028	-117.972	35.0028	49.2632	-35.0028	-6.482	-172.421	-67.4128	12.964	32.41	-42.7812	-112.787	-719.502	-261.873	120.565	-318.914	-71.302	66.1164	70.0056	-138.715	171.125	117.972	191.867	178.903	31.1136	-14.2604	-75.1912	35.0028	-59.6344
85	-38.892	107.601	23.3352	49.2632	-1.2964	40.1884	19.446	105.008	-197.053	-115.38	141.308	-53.1524	-137.418	-93.3408	-94.6372	-350.028	-28.5208	-72.5984	18.1496	23.3352	-35.0028	-119.269	35.0028	55.7452	-33.7064	-9.0748	-172.421	-66.1164	12.964	32.41	-44.0776	-115.38	-731.17	-269.651	111.49	-329.286	-71.302	66.1164	68.7092	-137.418	160.754	106.305	193.164	190.571	35.0028	-10.3712	-73.8948	36.2992	-59.6344
86	-40.1884	108.898	24.6316	49.2632	1.2964	40.1884	24.6316	102.416	-195.756	-116.676	140.011	-58.338	-141.308	-86.8588	-89.4516	-351.324	-28.5208	-77.784	19.446	35.0028	-38.892	-119.269	32.41	55.7452	-29.8172	-12.964	-172.421	-66.1164	12.964	32.41	-46.6704	-94.6372	-738.948	-276.133	99.8228	-335.768	-71.302	68.7092	70.0056	-137.418	155.568	99.8228	190.571	200.942	35.0028	-7.7784	-72.5984	35.0028	-57.0416
87	-40.1884	107.601	23.3352	49.2632	1.2964	38.892	23.3352	99.8228	-195.756	-120.565	137.418	-62.2272	-149.086	-85.5624	-86.8588	-350.028	-23.3352	-81.6732	18.1496	35.0028	-37.5956	-120.565	37.5956	59.6344	-28.5208	-12.964	-171.125	-64.82	12.964	31.1136	-46.6704	-86.8588	-745.43	-281.319	85.5624	-329.286	-71.302	67.4128	67.4128	-136.122	147.79	89.4516	187.978	211.313	36.2992	-9.0748	-72.5984	35.0028	-57.0416
88	-38.892	106.305	23.3352	47.9668	3.8892	40.1884	22.0388	95.9336	-194.46	-120.565	132.233	-64.82	-152.975	-80.3768	-89.4516	-342.25	-18.1496	-82.9696	-2.5928	29.8172	-36.2992	-119.269	33.7064	57.0416	-27.2244	-10.3712	-172.421	-67.4128	12.964	33.7064	-50.5596	-85.5624	-750.616	-286.504	79.0804	-316.322	-71.302	67.4128	64.82	-134.826	141.308	76.4876	184.089	221.684	36.2992	-15.5568	-72.5984	36.2992	-55.7452
89	-41.4848	107.601	22.0388	47.9668	3.8892	40.1884	18.1496	103.712	-193.164	-129.64	129.64	-68.7092	-155.568	-77.784	-88.1552	-337.064	-16.8532	-79.0804	-3.8892	28.5208	-35.0028	-119.269	33.7064	58.338	-25.928	-11.6676	-171.125	-67.4128	12.964	33.7064	-55.7452	-79.0804	-755.801	-292.986	79.0804	-302.061	-72.5984	66.1164	63.5236	-132.233	142.604	66.1164	180.2	230.759	32.41	-16.8532	-73.8948	36.2992	-57.0416
90	-42.7812	108.898	23.3352	46.6704	-1.2964	38.892	10.3712	111.49	-194.46	-132.233	127.047	-72.5984	-159.457	-70.0056	-99.8228	-326.693	-16.8532	-79.0804	-2.5928	28.5208	-36.2992	-119.269	37.5956	62.2272	-23.3352	-12.964	-171.125	-68.7092	12.964	33.7064	-68.7092	-73.8948	-759.69	-300.765	82.9696	-292.986	-71.302	64.82	62.2272	-129.64	136.122	62.2272	173.718	238.538	29.8172	-18.1496	-73.8948	37.5956	-58.338
91	-42.7812	107.601	23.3352	46.6704	-1.2964	36.2992	9.0748	116.676	-197.053	-133.529	124.454	-73.8948	-167.236	-64.82	-94.6372	-324.1	-16.8532	-73.8948	7.7784	25.928	-38.892	-117.972	38.892	62.2272	-20.7424	-11.6676	-169.828	-67.4128	12.964	33.7064	-75.1912	-63.5236	-757.098	-312.432	90.748	-286.504	-71.302	67.4128	62.2272	-128.344	129.64	55.7452	155.568	247.612	35.0028	-14.2604	-75.1912	40.1884	-55.7452
92	-41.4848	108.898	24.6316	42.7812	-2.5928	37.5956	3.8892	119.269	-198.349	-130.936	121.862	-75.1912	-167.236	-63.5236	-92.0444	-322.804	-12.964	-71.302	7.7784	25.928	-37.5956	-117.972	38.892	62.2272	-19.446	-9.0748	-169.828	-68.7092	14.2604	35.0028	-72.5984	-58.338	-759.69	-322.804	111.49	-290.394	-71.302	68.7092	60.9308	-127.047	137.418	44.0776	147.79	257.984	42.7812	-12.964	-76.4876	41.4848	-54.4488
93	-40.1884	111.49	25.928	41.4848	-1.2964	37.5956	9.0748	124.454	-206.128	-121.862	120.565	-77.784	-167.236	-62.2272	-82.9696	-321.507	-6.482	-66.1164	18.1496	23.3352	-38.892	-117.972	41.4848	66.1164	-16.8532	-7.7784	-168.532	-68.7092	15.5568	35.0028	-71.302	-58.338	-763.58	-327.989	123.158	-300.765	-70.0056	67.4128	58.338	-124.454	133.529	33.7064	141.308	265.762	44.0776	-27.2244	-76.4876	42.7812	-54.4488
94	-41.4848	112.787	24.6316	40.1884	0	41.4848	12.964	124.454	-211.313	-120.565	120.565	-80.3768	-167.236	-53.1524	-79.0804	-317.618	-6.482	-66.1164	19.446	18.1496	-38.892	-117.972	40.1884	63.5236	-15.5568	-7.7784	-167.236	-67.4128	15.5568	36.2992	-71.302	-59.6344	-767.469	-335.768	128.344	-313.729	-71.302	67.4128	58.338	-123.158	133.529	23.3352	132.233	269.651	44.0776	-29.8172	-77.784	44.0776	-54.4488
95	-40.1884	112.787	22.0388	40.1884	1.2964	44.0776	12.964	117.972	-216.499	-121.862	120.565	-82.9696	-172.421	-45.374	-72.5984	-315.025	-5.1856	-66.1164	22.0388	12.964	-38.892	-117.972	40.1884	64.82	-14.2604	-7.7784	-164.643	-66.1164	15.5568	36.2992	-89.4516	-45.374	-771.358	-343.546	121.862	-329.286	-71.302	67.4128	58.338	-120.565	132.233	16.8532	123.158	273.54	46.6704	-29.8172	-75.1912	44.0776	-53.1524
96	-38.892	112.787	22.0388	40.1884	2.5928	44.0776	16.8532	112.787	-225.574	-115.38	120.565	-82.9696	-175.014	-40.1884	-67.4128	-316.322	-6.482	-62.2272	24.6316	12.964	-40.1884	-117.972	42.7812	64.82	-15.5568	-9.0748	-164.643	-66.1164	16.8532	36.2992	-93.3408	-38.892	-775.247	-352.621	111.49	-337.064	-71.302	68.7092	58.338	-117.972	129.64	9.0748	108.898	276.133	53.1524	-25.928	-73.8948	47.9668	-51.856
97	-38.892	112.787	20.7424	38.892	5.1856	46.6704	20.7424	106.305	-234.648	-114.083	119.269	-85.5624	-184.089	-29.8172	-67.4128	-324.1	-5.1856	-59.6344	3.8892	10.3712	-40.1884	-117.972	45.374	66.1164	-14.2604	-10.3712	-164.643	-66.1164	16.8532	36.2992	-93.3408	-35.0028	-777.84	-359.103	89.4516	-334.471	-72.5984	68.7092	58.338	-116.676	120.565	-1.2964	103.712	281.319	55.7452	-24.6316	-72.5984	49.2632	-50.5596
98	-38.892	114.083	20.7424	37.5956	3.8892	49.2632	22.0388	108.898	-202.238	-81.6732	119.269	-85.5624	-200.942	-33.7064	-68.7092	-326.693	-5.1856	-59.6344	3.8892	5.1856	-40.1884	-117.972	42.7812	64.82	-14.2604	-10.3712	-164.643	-64.82	18.1496	36.2992	-101.119	-24.6316	-780.433	-368.178	76.4876	-322.804	-72.5984	68.7092	58.338	-114.083	120.565	-15.5568	97.23	289.097	60.9308	-28.5208	-70.0056	45.374	-50.5596
99	-38.892	114.083	19.446	38.892	2.5928	49.2632	18.1496	112.787	-207.424	-97.23	119.269	-86.8588	-187.978	-33.7064	-60.9308	-326.693	-9.0748	-60.9308	3.8892	1.2964	-40.1884	-117.972	41.4848	67.4128	-14.2604	-9.0748	-164.643	-63.5236	19.446	36.2992	-94.6372	-45.374	-780.433	-378.549	77.784	-305.95	-72.5984	68.7092	58.338	-110.194	117.972	-24.6316	92.0444	296.876	60.9308	-29.8172	-68.7092	44.0776	-49.2632
100	-41.4848	115.38	19.446	36.2992	0	49.2632	16.8532	111.49	-176.31	-68.7092	119.269	-88.1552	-194.46	-42.7812	-51.856	-326.693	-9.0748	-62.2272	3.8892	-1.2964	-41.4848	-117.972	42.7812	67.4128	-11.6676	-6.482	-163.346	-63.5236	20.7424	36.2992	-94.6372	-49.2632	-777.84	-387.624	84.266	-291.69	-72.5984	68.7092	58.338	-107.601	115.38	-38.892	88.1552	302.061	58.338	-29.8172	-68.7092	41.4848	-49.2632
101	-42.7812	116.676	20.7424	35.0028	2.5928	47.9668	20.7424	114.083	-182.792	-86.8588	119.269	-88.1552	-204.831	-37.5956	-42.7812	-327.989	-9.0748	-66.1164	14.2604	-1.2964	-41.4848	-117.972	46.6704	70.0056	-12.964	-9.0748	-162.05	-60.9308	22.0388	36.2992	-97.23	-55.7452	-773.951	-399.291	92.0444	-278.726	-72.5984	70.0056	58.338	-103.712	114.083	-51.856	75.1912	307.247	54.4488	-31.1136	-67.4128	38.892	-47.9668
102	-40.1884	115.38	19.446	36.2992	1.2964	46.6704	22.0388	115.38	-228.166	-94.6372	121.862	-89.4516	-207.424	-33.7064	-38.892	-327.989	-11.6676	-70.0056	14.2604	-1.2964	-41.4848	-116.676	46.6704	70.0056	-16.8532	-10.3712	-163.346	-60.9308	23.3352	36.2992	-94.6372	-59.6344	-773.951	-412.255	108.898	-276.133	-72.5984	70.0056	57.0416	-101.119	115.38	-64.82	54.4488	298.172	46.6704	-19.446	-62.2272	33.7064	-46.6704
103	-37.5956	114.083	18.1496	35.0028	3.8892	49.2632	23.3352	116.676	-245.02	-86.8588	123.158	-93.3408	-212.61	-27.2244	-44.0776	-320.211	-11.6676	-72.5984	14.2604	-6.482	-41.4848	-117.972	47.9668	70.0056	-19.446	-12.964	-160.754	-58.338	24.6316	36.2992	-85.5624	-66.1164	-779.136	-421.33	124.454	-280.022	-72.5984	70.0056	55.7452	-99.8228	110.194	-71.302	40.1884	292.986	42.7812	-12.964	-60.9308	33.7064	-47.9668
104	-42.7812	121.862	18.1496	35.0028	2.5928	50.5596	22.0388	119.269	-245.02	-88.1552	124.454	-94.6372	-219.092	-23.3352	-46.6704	-320.211	-11.6676	-72.5984	15.5568	-7.7784	-41.4848	-116.676	47.9668	71.302	-20.7424	-12.964	-158.161	-58.338	25.928	35.0028	-89.4516	-66.1164	-781.729	-431.701	133.529	-296.876	-73.8948	71.302	55.7452	-98.5264	119.269	-73.8948	20.7424	281.319	38.892	-11.6676	-59.6344	33.7064	-49.2632
105	-28.5208	110.194	16.8532	35.0028	2.5928	47.9668	20.7424	121.862	-239.834	-117.972	125.751	-97.23	-225.574	-20.7424	-41.4848	-338.36	-14.2604	-89.4516	18.1496	-10.3712	-77.784	-160.754	44.0776	71.302	-22.0388	-12.964	-156.864	-58.338	27.2244	35.0028	-93.3408	-62.2272	-784.322	-438.183	137.418	-311.136	-73.8948	71.302	55.7452	-97.23	127.047	-75.1912	10.3712	273.54	51.856	5.1856	-58.338	35.0028	-49.2632
106	-32.41	115.38	18.1496	33.7064	5.1856	49.2632	22.0388	120.565	-238.538	-114.083	125.751	-101.119	-226.87	-20.7424	-42.7812	-348.732	-14.2604	-94.6372	20.7424	-25.928	-79.0804	-159.457	45.374	75.1912	-24.6316	-11.6676	-158.161	-58.338	29.8172	33.7064	-93.3408	-62.2272	-784.322	-444.665	130.936	-322.804	-73.8948	72.5984	57.0416	-97.23	125.751	-73.8948	5.1856	269.651	62.2272	10.3712	-55.7452	36.2992	-50.5596
107	-32.41	115.38	18.1496	33.7064	6.482	50.5596	20.7424	117.972	-234.648	-111.49	125.751	-102.416	-224.277	-25.928	-42.7812	-352.621	-14.2604	-101.119	28.5208	-33.7064	-79.0804	-159.457	45.374	75.1912	-27.2244	-7.7784	-154.272	-58.338	29.8172	33.7064	-99.8228	-63.5236	-788.211	-452.444	115.38	-326.693	-75.1912	73.8948	59.6344	-99.8228	125.751	-73.8948	-1.2964	267.058	67.4128	15.5568	-53.1524	36.2992	-50.5596
108	-35.0028	116.676	16.8532	35.0028	2.5928	46.6704	15.5568	116.676	-233.352	-107.601	125.751	-103.712	-224.277	-31.1136	-47.9668	-352.621	-11.6676	-115.38	28.5208	-33.7064	-79.0804	-159.457	45.374	76.4876	-31.1136	-7.7784	-156.864	-59.6344	32.41	32.41	-101.119	-66.1164	-795.99	-458.926	102.416	-316.322	-75.1912	73.8948	63.5236	-103.712	119.269	-72.5984	-6.482	263.169	76.4876	29.8172	-53.1524	36.2992	-50.5596
109	-33.7064	115.38	15.5568	35.0028	7.7784	50.5596	11.6676	116.676	-243.723	-111.49	127.047	-103.712	-222.981	-33.7064	-49.2632	-351.324	-11.6676	-123.158	22.0388	-36.2992	-79.0804	-160.754	45.374	77.784	-31.1136	-9.0748	-156.864	-58.338	32.41	32.41	-107.601	-71.302	-794.693	-465.408	92.0444	-304.654	-75.1912	75.1912	67.4128	-106.305	127.047	-75.1912	-11.6676	260.576	84.266	40.1884	-51.856	37.5956	-51.856
110	-38.892	119.269	15.5568	32.41	7.7784	51.856	11.6676	115.38	-267.058	-121.862	128.344	-105.008	-224.277	-33.7064	-49.2632	-348.732	7.7784	-171.125	20.7424	-36.2992	-79.0804	-160.754	40.1884	120.565	-31.1136	-11.6676	-156.864	-57.0416	33.7064	32.41	-107.601	-71.302	-792.1	-475.779	89.4516	-292.986	-76.4876	76.4876	70.0056	-106.305	134.826	-77.784	-16.8532	255.391	86.8588	45.374	-51.856	37.5956	-54.4488
111	-40.1884	121.862	16.8532	28.5208	9.0748	54.4488	14.2604	115.38	-263.169	-123.158	129.64	-105.008	-235.945	-29.8172	-47.9668	-348.732	7.7784	-186.682	19.446	-37.5956	-80.3768	-159.457	15.5568	98.5264	-31.1136	-12.964	-171.125	-84.266	36.2992	31.1136	-92.0444	-70.0056	-794.693	-486.15	92.0444	-278.726	-76.4876	77.784	71.302	-107.601	141.308	-79.0804	-18.1496	247.612	85.5624	49.2632	-51.856	36.2992	-55.7452
112	-41.4848	123.158	15.5568	29.8172	11.6676	57.0416	14.2604	115.38	-264.466	-125.751	129.64	-103.712	-237.241	-27.2244	-47.9668	-348.732	7.7784	-187.978	25.928	-35.0028	-80.3768	-159.457	18.1496	88.1552	-32.41	-12.964	-154.272	-58.338	36.2992	32.41	-97.23	-63.5236	-788.211	-499.114	105.008	-273.54	-77.784	77.784	72.5984	-107.601	140.011	-85.5624	-25.928	242.427	82.9696	53.1524	-53.1524	36.2992	-57.0416
113	-47.9668	127.047	15.5568	29.8172	12.964	57.0416	11.6676	114.083	-265.762	-129.64	130.936	-103.712	-233.352	-31.1136	-46.6704	-347.435	3.8892	-181.496	25.928	-29.8172	-81.6732	-162.05	19.446	88.1552	-32.41	-12.964	-169.828	-85.5624	37.5956	32.41	-99.8228	-60.9308	-785.618	-510.782	124.454	-270.948	-77.784	77.784	72.5984	-107.601	136.122	-98.5264	-33.7064	238.538	92.0444	59.6344	-55.7452	33.7064	-55.7452
114	-50.5596	127.047	14.2604	31.1136	16.8532	58.338	44.0776	140.011	-273.54	-132.233	130.936	-102.416	-232.056	-37.5956	-45.374	-348.732	3.8892	-180.2	-33.7064	-42.7812	-82.9696	-162.05	19.446	88.1552	-35.0028	-11.6676	-151.679	-60.9308	40.1884	29.8172	-99.8228	-60.9308	-783.026	-521.153	140.011	-277.43	-79.0804	77.784	71.302	-111.49	134.826	-103.712	-37.5956	233.352	98.5264	68.7092	-58.338	31.1136	-59.6344
115	-50.5596	129.64	15.5568	31.1136	22.0388	59.6344	10.3712	112.787	-280.022	-137.418	133.529	-102.416	-232.056	-40.1884	-44.0776	-348.732	3.8892	-180.2	-33.7064	-46.6704	-82.9696	-163.346	18.1496	89.4516	-35.0028	-12.964	-163.346	-80.3768	41.4848	28.5208	-102.416	-60.9308	-779.136	-531.524	155.568	-281.319	-79.0804	77.784	70.0056	-115.38	134.826	-114.083	-32.41	217.795	111.49	75.1912	-59.6344	28.5208	-59.6344
116	-53.1524	130.936	15.5568	32.41	25.928	62.2272	10.3712	110.194	-278.726	-140.011	136.122	-101.119	-233.352	-41.4848	-42.7812	-352.621	3.8892	-180.2	-38.892	-49.2632	-84.266	-164.643	19.446	89.4516	-33.7064	-12.964	-162.05	-77.784	42.7812	27.2244	-102.416	-60.9308	-775.247	-539.302	162.05	-286.504	-79.0804	77.784	70.0056	-119.269	137.418	-119.269	-38.892	219.092	123.158	92.0444	-60.9308	27.2244	-60.9308
117	-57.0416	133.529	15.5568	35.0028	29.8172	62.2272	12.964	108.898	-285.208	-138.715	138.715	-101.119	-228.166	-42.7812	-38.892	-356.51	3.8892	-180.2	-45.374	-46.6704	-85.5624	-165.939	19.446	89.4516	-33.7064	-12.964	-159.457	-76.4876	45.374	24.6316	-102.416	-60.9308	-771.358	-544.488	163.346	-294.283	-77.784	77.784	63.5236	-125.751	138.715	-124.454	-45.374	219.092	128.344	106.305	-62.2272	25.928	-62.2272
118	-62.2272	134.826	16.8532	32.41	35.0028	63.5236	15.5568	108.898	-287.801	-140.011	141.308	-102.416	-220.388	-54.4488	-45.374	-360.399	3.8892	-185.385	-44.0776	-42.7812	-84.266	-168.532	20.7424	89.4516	-32.41	-12.964	-156.864	-77.784	45.374	20.7424	-102.416	-60.9308	-762.283	-549.674	171.125	-299.468	-79.0804	77.784	58.338	-130.936	141.308	-128.344	-42.7812	210.017	129.64	116.676	-63.5236	23.3352	-62.2272
119	-63.5236	137.418	18.1496	32.41	42.7812	67.4128	15.5568	110.194	-291.69	-140.011	142.604	-102.416	-224.277	-60.9308	-47.9668	-360.399	3.8892	-186.682	-28.5208	-47.9668	-79.0804	-180.2	22.0388	90.748	-32.41	-11.6676	-152.975	-81.6732	45.374	19.446	-102.416	-60.9308	-751.912	-554.859	175.014	-305.95	-77.784	77.784	57.0416	-136.122	141.308	-130.936	-53.1524	219.092	124.454	124.454	-64.82	20.7424	-63.5236
120	-67.4128	136.122	18.1496	32.41	47.9668	68.7092	22.0388	107.601	-295.579	-140.011	143.9	-102.416	-225.574	-63.5236	-51.856	-368.178	5.1856	-185.385	-22.0388	-59.6344	-79.0804	-182.792	22.0388	92.0444	-35.0028	-10.3712	-151.679	-80.3768	46.6704	16.8532	-98.5264	-55.7452	-744.134	-561.341	190.571	-302.061	-77.784	76.4876	55.7452	-138.715	134.826	-141.308	-58.338	221.684	124.454	127.047	-66.1164	19.446	-64.82
121	-70.0056	137.418	20.7424	29.8172	54.4488	72.5984	22.0388	112.787	-292.986	-138.715	146.493	-101.119	-225.574	-73.8948	-53.1524	-370.77	7.7784	-182.792	-16.8532	-60.9308	-79.0804	-185.385	24.6316	92.0444	-38.892	-9.0748	-151.679	-77.784	46.6704	16.8532	-97.23	-51.856	-733.762	-554.859	210.017	-289.097	-77.784	76.4876	55.7452	-138.715	123.158	-143.9	-62.2272	222.981	128.344	130.936	-66.1164	18.1496	-66.1164
122	-71.302	138.715	19.446	32.41	59.6344	73.8948	24.6316	116.676	-299.468	-137.418	146.493	-102.416	-233.352	-82.9696	-53.1524	-373.363	10.3712	-186.682	-10.3712	-67.4128	-82.9696	-184.089	23.3352	92.0444	-40.1884	-9.0748	-150.382	-76.4876	49.2632	15.5568	-93.3408	-44.0776	-724.688	-547.081	222.981	-285.208	-77.784	76.4876	57.0416	-140.011	123.158	-143.9	-64.82	221.684	123.158	137.418	-67.4128	16.8532	-66.1164
123	-73.8948	140.011	20.7424	33.7064	66.1164	75.1912	24.6316	119.269	-302.061	-136.122	146.493	-102.416	-234.648	-85.5624	-53.1524	-372.067	14.2604	-190.571	-16.8532	-60.9308	-85.5624	-184.089	23.3352	92.0444	-44.0776	-7.7784	-150.382	-75.1912	49.2632	14.2604	-93.3408	-29.8172	-719.502	-541.895	234.648	-278.726	-77.784	76.4876	57.0416	-141.308	124.454	-149.086	-70.0056	221.684	119.269	142.604	-67.4128	15.5568	-64.82
124	-75.1912	141.308	20.7424	35.0028	75.1912	76.4876	27.2244	119.269	-305.95	-134.826	147.79	-102.416	-237.241	-86.8588	-53.1524	-369.474	19.446	-194.46	-16.8532	-54.4488	-86.8588	-185.385	23.3352	92.0444	-47.9668	-7.7784	-150.382	-73.8948	50.5596	14.2604	-93.3408	-24.6316	-716.909	-540.599	245.02	-276.133	-77.784	76.4876	57.0416	-141.308	115.38	-150.382	-73.8948	221.684	121.862	149.086	-67.4128	15.5568	-63.5236
125	-76.4876	140.011	20.7424	35.0028	84.266	77.784	36.2992	116.676	-308.543	-132.233	149.086	-103.712	-237.241	-90.748	-54.4488	-366.881	20.7424	-197.053	-9.0748	-46.6704	-86.8588	-185.385	23.3352	90.748	-51.856	-9.0748	-149.086	-73.8948	53.1524	11.6676	-92.0444	-16.8532	-715.613	-536.71	256.687	-270.948	-77.784	76.4876	57.0416	-142.604	101.119	-154.272	-73.8948	219.092	119.269	151.679	-66.1164	14.2604	-64.82
126	-77.784	141.308	20.7424	36.2992	92.0444	79.0804	41.4848	115.38	-305.95	-123.158	151.679	-105.008	-241.13	-95.9336	-53.1524	-366.881	24.6316	-198.349	-3.8892	-37.5956	-85.5624	-187.978	24.6316	90.748	-54.4488	-9.0748	-147.79	-72.5984	54.4488	11.6676	-80.3768	-12.964	-710.427	-532.82	265.762	-264.466	-77.784	77.784	57.0416	-143.9	92.0444	-154.272	-75.1912	216.499	117.972	159.457	-64.82	15.5568	-66.1164
127	-77.784	141.308	22.0388	35.0028	88.1552	77.784	38.892	116.676	-312.432	-115.38	154.272	-103.712	-243.723	-97.23	-54.4488	-370.77	27.2244	-198.349	-2.5928	-31.1136	-86.8588	-185.385	24.6316	90.748	-55.7452	-10.3712	-146.493	-71.302	55.7452	11.6676	-71.302	-16.8532	-705.242	-526.338	276.133	-263.169	-77.784	76.4876	57.0416	-145.197	88.1552	-158.161	-80.3768	210.017	125.751	176.31	-64.82	16.8532	-66.1164
128	-75.1912	127.047	22.0388	36.2992	80.3768	76.4876	36.2992	115.38	-316.322	-108.898	156.864	-102.416	-243.723	-98.5264	-51.856	-375.956	27.2244	-198.349	-25.928	-11.6676	-86.8588	-184.089	24.6316	90.748	-58.338	-10.3712	-142.604	-68.7092	58.338	10.3712	-71.302	-18.1496	-703.945	-521.153	287.801	-261.873	-77.784	76.4876	58.338	-147.79	88.1552	-167.236	-93.3408	202.238	127.047	181.496	-64.82	18.1496	-67.4128
129	-73.8948	125.751	22.0388	37.5956	82.9696	76.4876	41.4848	105.008	-318.914	-105.008	160.754	-99.8228	-248.909	-98.5264	-49.2632	-379.845	27.2244	-193.164	-33.7064	-3.8892	-88.1552	-181.496	23.3352	90.748	-58.338	-10.3712	-141.308	-67.4128	60.9308	9.0748	-71.302	-19.446	-705.242	-513.374	299.468	-257.984	-77.784	77.784	59.6344	-149.086	81.6732	-165.939	-102.416	194.46	123.158	189.274	-64.82	19.446	-67.4128
130	-73.8948	125.751	22.0388	38.892	82.9696	75.1912	25.928	119.269	-322.804	-102.416	165.939	-97.23	-250.205	-101.119	-47.9668	-383.734	25.928	-190.571	-22.0388	1.2964	-86.8588	-186.682	23.3352	89.4516	-62.2272	-11.6676	-140.011	-64.82	60.9308	9.0748	-73.8948	-20.7424	-709.131	-504.3	309.84	-255.391	-77.784	77.784	59.6344	-150.382	80.3768	-164.643	-110.194	186.682	129.64	198.349	-63.5236	19.446	-64.82
131	-75.1912	128.344	22.0388	40.1884	81.6732	75.1912	25.928	119.269	-324.1	-102.416	171.125	-94.6372	-252.798	-102.416	-46.6704	-386.327	25.928	-190.571	-28.5208	6.482	-85.5624	-187.978	23.3352	90.748	-67.4128	-11.6676	-138.715	-62.2272	62.2272	9.0748	-75.1912	-25.928	-710.427	-495.225	318.914	-254.094	-77.784	79.0804	60.9308	-150.382	82.9696	-167.236	-115.38	184.089	134.826	211.313	-63.5236	22.0388	-64.82
132	-76.4876	130.936	22.0388	41.4848	77.784	75.1912	27.2244	120.565	-324.1	-103.712	176.31	-94.6372	-256.687	-102.416	-45.374	-394.106	25.928	-187.978	-35.0028	11.6676	-86.8588	-187.978	22.0388	90.748	-71.302	-6.482	-136.122	-62.2272	64.82	7.7784	-81.6732	-36.2992	-707.834	-486.15	326.693	-250.205	-76.4876	79.0804	62.2272	-151.679	84.266	-167.236	-120.565	184.089	136.122	215.202	-63.5236	22.0388	-64.82
133	-77.784	132.233	22.0388	41.4848	75.1912	75.1912	23.3352	120.565	-335.768	-103.712	182.792	-94.6372	-256.687	-102.416	-42.7812	-401.884	25.928	-190.571	-27.2244	10.3712	-86.8588	-186.682	22.0388	90.748	-77.784	-6.482	-134.826	-60.9308	68.7092	7.7784	-82.9696	-38.892	-701.352	-478.372	338.36	-247.612	-76.4876	79.0804	62.2272	-154.272	85.5624	-165.939	-123.158	182.792	130.936	229.463	-62.2272	22.0388	-64.82
134	-93.3408	136.122	20.7424	42.7812	76.4876	72.5984	24.6316	117.972	-335.768	-99.8228	187.978	-93.3408	-256.687	-106.305	-41.4848	-408.366	27.2244	-190.571	0	11.6676	-86.8588	-186.682	23.3352	89.4516	-82.9696	-1.2964	-133.529	-57.0416	72.5984	6.482	-84.266	-41.4848	-693.574	-477.075	344.842	-239.834	-76.4876	79.0804	63.5236	-155.568	92.0444	-182.792	-128.344	181.496	134.826	239.834	-62.2272	23.3352	-63.5236
135	-94.6372	137.418	20.7424	42.7812	60.9308	71.302	25.928	112.787	-330.582	-99.8228	193.164	-94.6372	-257.984	-106.305	-46.6704	-417.441	27.2244	-190.571	0	11.6676	-86.8588	-184.089	22.0388	90.748	-86.8588	2.5928	-130.936	-55.7452	73.8948	6.482	-84.266	-41.4848	-689.685	-470.593	350.028	-230.759	-76.4876	80.3768	63.5236	-156.864	92.0444	-178.903	-136.122	181.496	128.344	242.427	-60.9308	23.3352	-63.5236
136	-101.119	142.604	20.7424	45.374	60.9308	73.8948	28.5208	115.38	-326.693	-95.9336	199.646	-95.9336	-257.984	-112.787	-47.9668	-425.219	25.928	-190.571	-3.8892	-3.8892	-86.8588	-182.792	22.0388	92.0444	-88.1552	5.1856	-129.64	-50.5596	75.1912	5.1856	-92.0444	-41.4848	-681.906	-464.111	355.214	-219.092	-76.4876	82.9696	63.5236	-158.161	93.3408	-178.903	-142.604	181.496	132.233	239.834	-60.9308	24.6316	-64.82
137	-106.305	143.9	20.7424	45.374	59.6344	73.8948	29.8172	114.083	-294.283	-57.0416	204.831	-95.9336	-264.466	-119.269	-58.338	-427.812	25.928	-190.571	-10.3712	-15.5568	-86.8588	-184.089	22.0388	92.0444	-90.748	7.7784	-128.344	-46.6704	76.4876	5.1856	-99.8228	-38.892	-676.721	-455.036	357.806	-207.424	-76.4876	85.5624	64.82	-159.457	94.6372	-180.2	-147.79	181.496	129.64	243.723	-60.9308	24.6316	-63.5236
138	-110.194	146.493	18.1496	46.6704	58.338	72.5984	29.8172	115.38	-308.543	-86.8588	210.017	-94.6372	-265.762	-120.565	-71.302	-427.812	25.928	-190.571	-11.6676	-29.8172	-86.8588	-185.385	20.7424	94.6372	-90.748	9.0748	-127.047	-41.4848	76.4876	3.8892	-105.008	-38.892	-667.646	-445.962	357.806	-193.164	-76.4876	85.5624	64.82	-159.457	98.5264	-180.2	-152.975	181.496	155.568	272.244	-59.6344	24.6316	-60.9308
139	-119.269	149.086	19.446	47.9668	57.0416	72.5984	29.8172	115.38	-280.022	-54.4488	213.906	-97.23	-270.948	-120.565	-72.5984	-423.923	25.928	-191.867	-14.2604	-36.2992	-88.1552	-182.792	24.6316	88.1552	-92.0444	7.7784	-123.158	-38.892	76.4876	2.5928	-106.305	-41.4848	-663.757	-435.59	360.399	-184.089	-76.4876	86.8588	66.1164	-160.754	105.008	-176.31	-159.457	180.2	160.754	289.097	-60.9308	25.928	-60.9308
140	-115.38	146.493	19.446	47.9668	55.7452	72.5984	31.1136	115.38	-285.208	-64.82	220.388	-98.5264	-276.133	-119.269	-70.0056	-423.923	25.928	-191.867	-22.0388	-33.7064	-86.8588	-184.089	22.0388	90.748	-93.3408	3.8892	-119.269	-38.892	76.4876	2.5928	-106.305	-58.338	-657.275	-427.812	364.288	-180.2	-76.4876	88.1552	67.4128	-163.346	114.083	-175.014	-163.346	177.607	164.643	300.765	-59.6344	25.928	-63.5236
141	-116.676	149.086	20.7424	49.2632	50.5596	73.8948	31.1136	117.972	-287.801	-72.5984	224.277	-99.8228	-260.576	-110.194	-73.8948	-422.626	32.41	-191.867	-15.5568	-24.6316	-88.1552	-180.2	28.5208	72.5984	-94.6372	-1.2964	-116.676	-37.5956	77.784	0	-94.6372	-76.4876	-652.089	-418.737	369.474	-175.014	-76.4876	90.748	68.7092	-164.643	121.862	-175.014	-167.236	176.31	173.718	298.172	-58.338	25.928	-62.2272
142	-117.972	149.086	18.1496	53.1524	47.9668	72.5984	29.8172	120.565	-287.801	-86.8588	226.87	-101.119	-255.391	-116.676	-73.8948	-427.812	35.0028	-191.867	-11.6676	-15.5568	-88.1552	-178.903	22.0388	92.0444	-90.748	-3.8892	-114.083	-35.0028	77.784	0	-93.3408	-85.5624	-646.904	-412.255	378.549	-169.828	-77.784	90.748	70.0056	-168.532	128.344	-162.05	-169.828	177.607	180.2	305.95	-59.6344	27.2244	-60.9308
143	-119.269	149.086	19.446	53.1524	42.7812	72.5984	28.5208	119.269	-287.801	-90.748	229.463	-103.712	-250.205	-116.676	-73.8948	-435.59	35.0028	-191.867	-11.6676	-10.3712	-89.4516	-176.31	22.0388	92.0444	-88.1552	-7.7784	-111.49	-33.7064	79.0804	0	-82.9696	-93.3408	-639.125	-405.773	390.216	-165.939	-76.4876	90.748	70.0056	-173.718	136.122	-164.643	-171.125	177.607	181.496	309.84	-58.338	27.2244	-63.5236
144	-121.862	151.679	16.8532	54.4488	35.0028	70.0056	29.8172	117.972	-289.097	-94.6372	230.759	-106.305	-250.205	-117.972	-73.8948	-440.776	37.5956	-191.867	1.2964	-22.0388	-89.4516	-169.828	22.0388	93.3408	-88.1552	-11.6676	-106.305	-35.0028	79.0804	0	-84.266	-107.601	-635.236	-400.588	403.18	-165.939	-76.4876	90.748	72.5984	-173.718	146.493	-169.828	-171.125	175.014	184.089	320.211	-58.338	28.5208	-59.6344
145	-123.158	151.679	16.8532	55.7452	29.8172	68.7092	32.41	123.158	-313.729	-110.194	232.056	-107.601	-251.502	-117.972	-77.784	-439.48	41.4848	-190.571	6.482	-19.446	-89.4516	-168.532	23.3352	92.0444	-90.748	-19.446	-101.119	-36.2992	81.6732	-1.2964	-84.266	-112.787	-632.643	-397.995	417.441	-164.643	-77.784	90.748	72.5984	-175.014	154.272	-169.828	-171.125	175.014	189.274	329.286	-58.338	28.5208	-60.9308
146	-125.751	152.975	18.1496	58.338	27.2244	67.4128	31.1136	120.565	-311.136	-110.194	233.352	-108.898	-255.391	-117.972	-82.9696	-436.887	41.4848	-190.571	20.7424	-18.1496	-89.4516	-165.939	23.3352	94.6372	-89.4516	-18.1496	-97.23	-35.0028	82.9696	-2.5928	-84.266	-120.565	-628.754	-397.995	431.701	-165.939	-77.784	92.0444	72.5984	-177.607	158.161	-167.236	-175.014	176.31	191.867	343.546	-57.0416	28.5208	-60.9308
147	-125.751	150.382	16.8532	59.6344	25.928	66.1164	37.5956	124.454	-312.432	-112.787	234.648	-110.194	-251.502	-103.712	-84.266	-435.59	44.0776	-191.867	22.0388	-19.446	-89.4516	-167.236	23.3352	93.3408	-90.748	-24.6316	-93.3408	-36.2992	84.266	-3.8892	-80.3768	-141.308	-627.458	-399.291	442.072	-164.643	-77.784	93.3408	71.302	-181.496	162.05	-169.828	-173.718	176.31	203.535	370.77	-57.0416	28.5208	-94.6372
148	-127.047	151.679	15.5568	60.9308	22.0388	64.82	29.8172	120.565	-309.84	-114.083	235.945	-111.49	-251.502	-103.712	-84.266	-430.405	46.6704	-193.164	36.2992	-19.446	-89.4516	-165.939	23.3352	94.6372	-88.1552	-29.8172	-90.748	-36.2992	85.5624	-2.5928	-72.5984	-164.643	-633.94	-368.178	452.444	-165.939	-77.784	92.0444	71.302	-182.792	167.236	-169.828	-172.421	173.718	210.017	378.549	-57.0416	29.8172	-85.5624
149	-128.344	150.382	12.964	63.5236	18.1496	63.5236	31.1136	120.565	-308.543	-116.676	237.241	-114.083	-250.205	-106.305	-85.5624	-427.812	46.6704	-197.053	36.2992	-23.3352	-89.4516	-165.939	23.3352	94.6372	-85.5624	-35.0028	-84.266	-38.892	86.8588	-2.5928	-71.302	-181.496	-633.94	-368.178	468	-168.532	-79.0804	90.748	72.5984	-186.682	167.236	-172.421	-173.718	168.532	217.795	379.845	-57.0416	29.8172	-64.82
150	-128.344	147.79	10.3712	66.1164	15.5568	60.9308	35.0028	127.047	-318.914	-121.862	239.834	-115.38	-250.205	-110.194	-85.5624	-427.812	44.0776	-199.646	40.1884	-18.1496	-88.1552	-165.939	23.3352	95.9336	-81.6732	-40.1884	-76.4876	-45.374	90.748	0	-67.4128	-187.978	-633.94	-368.178	480.964	-171.125	-79.0804	92.0444	73.8948	-189.274	169.828	-176.31	-180.2	162.05	213.906	387.624	-57.0416	29.8172	-68.7092
151	-129.64	149.086	7.7784	68.7092	15.5568	59.6344	37.5956	125.751	-317.618	-121.862	242.427	-115.38	-248.909	-114.083	-81.6732	-423.923	32.41	-203.535	42.7812	-5.1856	-89.4516	-163.346	23.3352	98.5264	-82.9696	-41.4848	-68.7092	-50.5596	92.0444	-2.5928	-67.4128	-206.128	-635.236	-366.881	491.336	-175.014	-79.0804	93.3408	73.8948	-190.571	169.828	-175.014	-178.903	159.457	217.795	386.327	-57.0416	29.8172	-62.2272
152	-129.64	147.79	7.7784	68.7092	16.8532	59.6344	36.2992	125.751	-318.914	-120.565	243.723	-116.676	-248.909	-112.787	-79.0804	-418.737	14.2604	-210.017	42.7812	1.2964	-89.4516	-164.643	23.3352	98.5264	-82.9696	-40.1884	-60.9308	-57.0416	93.3408	-2.5928	-73.8948	-232.056	-635.236	-366.881	499.114	-181.496	-79.0804	90.748	75.1912	-191.867	167.236	-173.718	-173.718	158.161	213.906	382.438	-57.0416	29.8172	-64.82
153	-172.421	120.565	6.482	70.0056	18.1496	58.338	33.7064	125.751	-317.618	-119.269	245.02	-116.676	-248.909	-108.898	-76.4876	-412.255	2.5928	-221.684	38.892	-10.3712	-89.4516	-165.939	23.3352	99.8228	-82.9696	-38.892	-54.4488	-59.6344	94.6372	-3.8892	-73.8948	-250.205	-633.94	-368.178	503.003	-182.792	-79.0804	90.748	75.1912	-194.46	163.346	-175.014	-172.421	158.161	211.313	379.845	-57.0416	29.8172	-67.4128
154	-143.9	136.122	6.482	71.302	19.446	54.4488	29.8172	128.344	-320.211	-125.751	246.316	-117.972	-247.612	-105.008	-76.4876	-408.366	-2.5928	-242.427	31.1136	-11.6676	-89.4516	-165.939	24.6316	99.8228	-81.6732	-38.892	-47.9668	-63.5236	95.9336	-2.5928	-73.8948	-248.909	-633.94	-366.881	512.078	-176.31	-79.0804	90.748	76.4876	-197.053	154.272	-172.421	-168.532	156.864	211.313	381.142	-58.338	25.928	-67.4128
155	-142.604	136.122	5.1856	73.8948	15.5568	54.4488	23.3352	133.529	-320.211	-133.529	247.612	-120.565	-243.723	-103.712	-79.0804	-403.18	12.964	-243.723	22.0388	-11.6676	-89.4516	-165.939	24.6316	99.8228	-79.0804	-38.892	-42.7812	-67.4128	98.5264	-3.8892	-77.784	-261.873	-633.94	-366.881	518.56	-184.089	-80.3768	89.4516	77.784	-197.053	162.05	-167.236	-165.939	155.568	210.017	383.734	-63.5236	20.7424	-68.7092
156	-145.197	136.122	7.7784	75.1912	14.2604	51.856	24.6316	136.122	-317.618	-134.826	246.316	-123.158	-242.427	-103.712	-84.266	-399.291	12.964	-243.723	20.7424	-10.3712	-89.4516	-164.643	24.6316	101.119	-72.5984	-36.2992	-38.892	-66.1164	101.119	-5.1856	-81.6732	-277.43	-631.347	-366.881	525.042	-190.571	-80.3768	88.1552	77.784	-198.349	141.308	-168.532	-168.532	155.568	208.72	379.845	-62.2272	20.7424	-70.0056
157	-145.197	132.233	6.482	76.4876	14.2604	51.856	24.6316	136.122	-317.618	-133.529	246.316	-125.751	-243.723	-105.008	-90.748	-399.291	19.446	-246.316	20.7424	-6.482	-89.4516	-165.939	25.928	99.8228	-60.9308	-38.892	-35.0028	-66.1164	103.712	-6.482	-88.1552	-291.69	-630.05	-368.178	536.71	-199.646	-80.3768	88.1552	79.0804	-199.646	134.826	-168.532	-165.939	152.975	228.166	377.252	-60.9308	20.7424	-50.5596
158	-146.493	129.64	5.1856	79.0804	15.5568	53.1524	22.0388	141.308	-322.804	-129.64	246.316	-128.344	-243.723	-105.008	-93.3408	-399.291	24.6316	-246.316	20.7424	-15.5568	-89.4516	-164.643	25.928	101.119	-46.6704	-36.2992	-31.1136	-67.4128	105.008	-7.7784	-90.748	-305.95	-630.05	-368.178	545.784	-206.128	-80.3768	88.1552	80.3768	-202.238	128.344	-167.236	-160.754	147.79	217.795	372.067	-62.2272	22.0388	-60.9308
159	-149.086	129.64	5.1856	80.3768	15.5568	53.1524	16.8532	143.9	-329.286	-119.269	247.612	-133.529	-248.909	-101.119	-95.9336	-397.995	36.2992	-247.612	32.41	-15.5568	-89.4516	-164.643	25.928	102.416	-37.5956	-33.7064	-28.5208	-63.5236	107.601	-9.0748	-98.5264	-317.618	-630.05	-368.178	552.266	-216.499	-80.3768	88.1552	84.266	-204.831	119.269	-165.939	-154.272	146.493	210.017	368.178	-62.2272	22.0388	-68.7092
160	-152.975	129.64	3.8892	82.9696	16.8532	51.856	12.964	147.79	-327.989	-115.38	247.612	-136.122	-252.798	-90.748	-93.3408	-394.106	41.4848	-247.612	36.2992	-22.0388	-89.4516	-165.939	25.928	103.712	-33.7064	-35.0028	-24.6316	-66.1164	107.601	-9.0748	-101.119	-324.1	-630.05	-366.881	553.563	-222.981	-80.3768	88.1552	85.5624	-207.424	116.676	-164.643	-152.975	141.308	208.72	366.881	-60.9308	20.7424	-70.0056
161	-154.272	128.344	3.8892	85.5624	15.5568	54.4488	9.0748	154.272	-321.507	-107.601	247.612	-138.715	-252.798	-88.1552	-88.1552	-392.809	47.9668	-247.612	38.892	-22.0388	-88.1552	-164.643	27.2244	102.416	-29.8172	-35.0028	-22.0388	-68.7092	108.898	-11.6676	-110.194	-334.471	-627.458	-366.881	540.599	-234.648	-80.3768	85.5624	86.8588	-208.72	110.194	-168.532	-151.679	141.308	204.831	368.178	-60.9308	20.7424	-72.5984
162	-154.272	129.64	2.5928	88.1552	15.5568	53.1524	9.0748	159.457	-324.1	-99.8228	246.316	-143.9	-252.798	-82.9696	-84.266	-392.809	64.82	-246.316	32.41	-22.0388	-88.1552	-164.643	27.2244	102.416	-24.6316	-36.2992	-19.446	-72.5984	110.194	-12.964	-121.862	-340.953	-626.161	-366.881	523.746	-255.391	-80.3768	90.748	86.8588	-210.017	107.601	-173.718	-150.382	141.308	210.017	372.067	-60.9308	20.7424	-68.7092
163	-154.272	129.64	2.5928	89.4516	16.8532	53.1524	12.964	160.754	-326.693	-94.6372	246.316	-147.79	-255.391	-79.0804	-81.6732	-391.513	68.7092	-243.723	60.9308	-10.3712	-88.1552	-164.643	27.2244	103.712	-20.7424	-33.7064	-16.8532	-72.5984	114.083	-14.2604	-124.454	-351.324	-626.161	-366.881	515.967	-255.391	-80.3768	90.748	88.1552	-210.017	102.416	-177.607	-146.493	141.308	210.017	372.067	-60.9308	20.7424	-68.7092
164	-154.272	130.936	2.5928	90.748	16.8532	53.1524	18.1496	162.05	-322.804	-88.1552	246.316	-150.382	-250.205	-71.302	-85.5624	-391.513	68.7092	-241.13	63.5236	-7.7784	-88.1552	-164.643	28.5208	102.416	-15.5568	-36.2992	-15.5568	-73.8948	115.38	-11.6676	-133.529	-355.214	-628.754	-366.881	503.003	-252.798	-80.3768	89.4516	88.1552	-211.313	97.23	-176.31	-143.9	143.9	212.61	373.363	-60.9308	20.7424	-66.1164
165	-154.272	137.418	3.8892	90.748	18.1496	53.1524	16.8532	165.939	-320.211	-84.266	246.316	-154.272	-232.056	-50.5596	-84.266	-391.513	68.7092	-237.241	63.5236	-5.1856	-88.1552	-164.643	28.5208	103.712	-10.3712	-37.5956	-12.964	-73.8948	117.972	-11.6676	-141.308	-374.66	-672.832	-369.474	495.225	-248.909	-81.6732	89.4516	89.4516	-211.313	90.748	-177.607	-140.011	147.79	213.906	373.363	-60.9308	20.7424	-64.82
166	-158.161	137.418	1.2964	93.3408	16.8532	57.0416	19.446	171.125	-311.136	-79.0804	243.723	-156.864	-239.834	-62.2272	-88.1552	-388.92	64.82	-232.056	63.5236	-3.8892	-88.1552	-163.346	29.8172	103.712	-5.1856	-42.7812	-10.3712	-76.4876	119.269	-14.2604	-154.272	-385.031	-666.35	-369.474	490.039	-241.13	-82.9696	88.1552	89.4516	-211.313	85.5624	-175.014	-136.122	150.382	212.61	378.549	-60.9308	20.7424	-66.1164
167	-160.754	137.418	1.2964	95.9336	15.5568	54.4488	19.446	168.532	-302.061	-80.3768	241.13	-159.457	-241.13	-63.5236	-92.0444	-386.327	64.82	-230.759	68.7092	-5.1856	-88.1552	-163.346	29.8172	105.008	-1.2964	-42.7812	-7.7784	-73.8948	119.269	-15.5568	-154.272	-404.477	-666.35	-370.77	486.15	-233.352	-82.9696	86.8588	90.748	-211.313	82.9696	-178.903	-134.826	151.679	210.017	379.845	-60.9308	20.7424	-67.4128
168	-160.754	137.418	1.2964	94.6372	7.7784	57.0416	18.1496	165.939	-299.468	-79.0804	241.13	-160.754	-245.02	-63.5236	-94.6372	-386.327	64.82	-230.759	68.7092	-7.7784	-88.1552	-163.346	29.8172	106.305	3.8892	-42.7812	-3.8892	-71.302	119.269	-16.8532	-165.939	-413.552	-666.35	-370.77	480.964	-225.574	-82.9696	86.8588	90.748	-211.313	81.6732	-180.2	-134.826	156.864	207.424	379.845	-60.9308	20.7424	-70.0056
169	-162.05	138.715	1.2964	95.9336	6.482	57.0416	18.1496	156.864	-290.394	-81.6732	241.13	-163.346	-250.205	-64.82	-93.3408	-388.92	68.7092	-230.759	64.82	-7.7784	-88.1552	-163.346	31.1136	103.712	9.0748	-46.6704	2.5928	-59.6344	119.269	-16.8532	-165.939	-431.701	-665.053	-370.77	474.482	-215.202	-82.9696	86.8588	92.0444	-212.61	79.0804	-182.792	-130.936	160.754	204.831	382.438	-60.9308	20.7424	-73.8948
170	-165.939	141.308	-1.2964	95.9336	6.482	57.0416	20.7424	154.272	-286.504	-79.0804	239.834	-165.939	-250.205	-64.82	-92.0444	-391.513	71.302	-235.945	64.82	-3.8892	-88.1552	-163.346	31.1136	105.008	14.2604	-49.2632	7.7784	-77.784	117.972	-16.8532	-181.496	-438.183	-666.35	-370.77	473.186	-207.424	-82.9696	86.8588	92.0444	-211.313	76.4876	-187.978	-127.047	163.346	211.313	378.549	-60.9308	20.7424	-66.1164
171	-167.236	142.604	-2.5928	95.9336	6.482	57.0416	20.7424	158.161	-285.208	-72.5984	237.241	-168.532	-250.205	-62.2272	-93.3408	-390.216	75.1912	-235.945	67.4128	-3.8892	-88.1552	-162.05	32.41	103.712	18.1496	-53.1524	12.964	-75.1912	119.269	-20.7424	-199.646	-439.48	-662.46	-372.067	473.186	-200.942	-84.266	84.266	93.3408	-212.61	75.1912	-198.349	-123.158	164.643	215.202	379.845	-60.9308	20.7424	-60.9308
172	-168.532	142.604	-2.5928	97.23	9.0748	55.7452	18.1496	160.754	-283.912	-66.1164	233.352	-169.828	-251.502	-63.5236	-94.6372	-391.513	76.4876	-235.945	68.7092	-3.8892	-88.1552	-160.754	32.41	103.712	22.0388	-58.338	16.8532	-68.7092	119.269	-20.7424	-206.128	-453.74	-661.164	-372.067	474.482	-193.164	-82.9696	84.266	93.3408	-212.61	76.4876	-198.349	-119.269	164.643	221.684	381.142	-60.9308	20.7424	-55.7452
173	-169.828	141.308	-2.5928	98.5264	10.3712	55.7452	16.8532	162.05	-281.319	-60.9308	230.759	-171.125	-256.687	-66.1164	-95.9336	-391.513	86.8588	-235.945	70.0056	-3.8892	-86.8588	-162.05	31.1136	106.305	23.3352	-60.9308	23.3352	-66.1164	119.269	-20.7424	-216.499	-462.815	-662.46	-372.067	474.482	-187.978	-82.9696	84.266	94.6372	-212.61	76.4876	-198.349	-117.972	165.939	224.277	378.549	-60.9308	20.7424	-53.1524
174	-169.828	141.308	0	99.8228	9.0748	51.856	10.3712	147.79	-280.022	-89.4516	229.463	-173.718	-256.687	-70.0056	-95.9336	-391.513	84.266	-235.945	58.338	-6.482	-86.8588	-160.754	32.41	105.008	25.928	-64.82	31.1136	-64.82	119.269	-22.0388	-224.277	-468	-662.46	-372.067	477.075	-184.089	-82.9696	84.266	95.9336	-212.61	76.4876	-198.349	-116.676	167.236	225.574	377.252	-60.9308	20.7424	-53.1524
175	-168.532	143.9	35.0028	98.5264	10.3712	49.2632	14.2604	155.568	-282.615	-90.748	226.87	-173.718	-250.205	-77.784	-95.9336	-391.513	84.266	-235.945	57.0416	-15.5568	-86.8588	-162.05	32.41	105.008	27.2244	-67.4128	35.0028	-71.302	119.269	-24.6316	-225.574	-471.89	-663.757	-370.77	479.668	-181.496	-82.9696	85.5624	95.9336	-212.61	75.1912	-195.756	-115.38	168.532	226.87	372.067	-60.9308	22.0388	-50.5596
176	-168.532	143.9	31.1136	98.5264	11.6676	49.2632	16.8532	162.05	-280.022	-92.0444	225.574	-175.014	-250.205	-79.0804	-98.5264	-390.216	90.748	-235.945	57.0416	-25.928	-86.8588	-159.457	32.41	106.305	28.5208	-72.5984	38.892	-80.3768	120.565	-28.5208	-238.538	-474.482	-662.46	-369.474	477.075	-176.31	-82.9696	82.9696	97.23	-212.61	71.302	-190.571	-115.38	169.828	229.463	373.363	-59.6344	22.0388	-49.2632
177	-169.828	143.9	32.41	98.5264	10.3712	46.6704	19.446	164.643	-283.912	-93.3408	224.277	-177.607	-256.687	-79.0804	-102.416	-388.92	92.0444	-235.945	51.856	-25.928	-86.8588	-159.457	32.41	107.601	31.1136	-75.1912	42.7812	-84.266	120.565	-31.1136	-242.427	-482.261	-663.757	-368.178	470.593	-172.421	-82.9696	82.9696	98.5264	-212.61	71.302	-190.571	-115.38	171.125	228.166	372.067	-58.338	23.3352	-49.2632
178	-169.828	140.011	32.41	98.5264	12.964	45.374	18.1496	164.643	-283.912	-92.0444	220.388	-178.903	-256.687	-77.784	-108.898	-385.031	92.0444	-235.945	57.0416	-11.6676	-85.5624	-159.457	33.7064	106.305	32.41	-79.0804	45.374	-86.8588	120.565	-33.7064	-252.798	-491.336	-665.053	-368.178	465.408	-176.31	-82.9696	82.9696	99.8228	-212.61	68.7092	-187.978	-115.38	172.421	226.87	378.549	-58.338	22.0388	-50.5596
179	-172.421	137.418	32.41	99.8228	14.2604	45.374	19.446	164.643	-282.615	-92.0444	217.795	-180.2	-256.687	-75.1912	-110.194	-381.142	93.3408	-235.945	57.0416	-12.964	-125.751	-167.236	32.41	107.601	33.7064	-82.9696	49.2632	-89.4516	121.862	-37.5956	-256.687	-519.856	-665.053	-368.178	465.408	-180.2	-82.9696	82.9696	99.8228	-212.61	70.0056	-189.274	-116.676	173.718	230.759	379.845	-58.338	20.7424	-46.6704
180	-173.718	133.529	33.7064	99.8228	15.5568	44.0776	19.446	165.939	-282.615	-92.0444	216.499	-178.903	-255.391	-73.8948	-115.38	-373.363	93.3408	-235.945	54.4488	-16.8532	-121.862	-169.828	33.7064	106.305	35.0028	-85.5624	54.4488	-90.748	120.565	-38.892	-250.205	-530.228	-665.053	-368.178	466.704	-193.164	-82.9696	84.266	101.119	-212.61	71.302	-189.274	-119.269	176.31	234.648	377.252	-58.338	20.7424	-44.0776
181	-175.014	132.233	33.7064	103.712	15.5568	42.7812	22.0388	169.828	-278.726	-90.748	215.202	-180.2	-251.502	-72.5984	-120.565	-369.474	95.9336	-235.945	46.6704	-6.482	-117.972	-172.421	33.7064	106.305	36.2992	-84.266	60.9308	-90.748	120.565	-38.892	-257.984	-531.524	-663.757	-368.178	465.408	-212.61	-84.266	81.6732	101.119	-212.61	67.4128	-185.385	-120.565	177.607	235.945	369.474	-58.338	19.446	-42.7812
182	-177.607	132.233	35.0028	106.305	15.5568	41.4848	18.1496	169.828	-282.615	-89.4516	212.61	-180.2	-252.798	-72.5984	-124.454	-368.178	98.5264	-232.056	46.6704	-1.2964	-116.676	-169.828	33.7064	107.601	36.2992	-89.4516	64.82	-95.9336	120.565	-40.1884	-265.762	-531.524	-630.05	-355.214	478.372	-226.87	-84.266	81.6732	102.416	-212.61	68.7092	-184.089	-121.862	177.607	234.648	362.992	-59.6344	19.446	-42.7812
183	-178.903	132.233	35.0028	105.008	16.8532	44.0776	16.8532	168.532	-292.986	-90.748	211.313	-180.2	-257.984	-68.7092	-130.936	-364.288	98.5264	-230.759	45.374	7.7784	-116.676	-167.236	33.7064	108.898	37.5956	-88.1552	67.4128	-98.5264	121.862	-41.4848	-265.762	-531.524	-624.865	-356.51	482.261	-239.834	-84.266	82.9696	103.712	-212.61	75.1912	-184.089	-123.158	176.31	238.538	359.103	-59.6344	18.1496	-40.1884
184	-180.2	132.233	36.2992	108.898	16.8532	44.0776	3.8892	169.828	-295.579	-92.0444	211.313	-181.496	-259.28	-66.1164	-142.604	-361.696	107.601	-226.87	40.1884	12.964	-116.676	-164.643	33.7064	108.898	38.892	-89.4516	72.5984	-99.8228	123.158	-42.7812	-265.762	-531.524	-624.865	-355.214	488.743	-248.909	-84.266	82.9696	103.712	-212.61	76.4876	-180.2	-124.454	175.014	241.13	356.51	-59.6344	18.1496	-36.2992
185	-182.792	134.826	37.5956	107.601	18.1496	46.6704	3.8892	169.828	-299.468	-88.1552	210.017	-181.496	-267.058	-62.2272	-156.864	-364.288	106.305	-230.759	63.5236	25.928	-111.49	-169.828	33.7064	110.194	40.1884	-90.748	79.0804	-88.1552	123.158	-41.4848	-276.133	-536.71	-624.865	-355.214	482.261	-260.576	-84.266	82.9696	103.712	-212.61	73.8948	-173.718	-127.047	173.718	242.427	352.621	-59.6344	18.1496	-35.0028
186	-184.089	133.529	36.2992	108.898	20.7424	44.0776	5.1856	169.828	-303.358	-89.4516	208.72	-182.792	-267.058	-60.9308	-162.05	-369.474	108.898	-234.648	72.5984	23.3352	-110.194	-168.532	33.7064	111.49	44.0776	-85.5624	84.266	-80.3768	124.454	-44.0776	-282.615	-536.71	-622.272	-356.51	478.372	-273.54	-84.266	85.5624	103.712	-212.61	67.4128	-163.346	-130.936	176.31	246.316	350.028	-59.6344	18.1496	-31.1136
187	-185.385	133.529	35.0028	110.194	20.7424	42.7812	7.7784	168.532	-303.358	-90.748	206.128	-184.089	-268.355	-60.9308	-159.457	-377.252	110.194	-234.648	80.3768	19.446	-108.898	-169.828	35.0028	110.194	41.4848	-89.4516	86.8588	-75.1912	125.751	-44.0776	-281.319	-536.71	-622.272	-356.51	469.297	-285.208	-84.266	85.5624	103.712	-212.61	67.4128	-156.864	-130.936	175.014	248.909	348.732	-59.6344	18.1496	-27.2244
188	-186.682	134.826	37.5956	116.676	20.7424	41.4848	9.0748	167.236	-304.654	-97.23	203.535	-185.385	-272.244	-55.7452	-158.161	-369.474	112.787	-234.648	80.3768	14.2604	-110.194	-167.236	35.0028	110.194	42.7812	-89.4516	92.0444	-70.0056	127.047	-46.6704	-278.726	-538.006	-622.272	-356.51	456.333	-295.579	-84.266	86.8588	103.712	-212.61	68.7092	-152.975	-133.529	173.718	250.205	348.732	-59.6344	16.8532	-27.2244
189	-189.274	133.529	40.1884	117.972	22.0388	40.1884	14.2604	162.05	-304.654	-101.119	202.238	-186.682	-278.726	-55.7452	-156.864	-365.585	114.083	-232.056	57.0416	20.7424	-112.787	-162.05	36.2992	110.194	44.0776	-86.8588	94.6372	-67.4128	128.344	-47.9668	-283.912	-536.71	-623.568	-356.51	443.369	-300.765	-84.266	88.1552	103.712	-212.61	70.0056	-150.382	-137.418	173.718	251.502	347.435	-59.6344	16.8532	-24.6316
190	-189.274	128.344	38.892	115.38	23.3352	40.1884	20.7424	160.754	-304.654	-101.119	199.646	-187.978	-282.615	-54.4488	-155.568	-361.696	114.083	-230.759	54.4488	23.3352	-111.49	-160.754	36.2992	110.194	42.7812	-85.5624	97.23	-67.4128	128.344	-49.2632	-304.654	-519.856	-623.568	-356.51	440.776	-302.061	-84.266	89.4516	103.712	-212.61	79.0804	-156.864	-137.418	173.718	255.391	346.139	-59.6344	16.8532	-22.0388
191	-190.571	129.64	37.5956	116.676	25.928	37.5956	24.6316	162.05	-302.061	-103.712	198.349	-189.274	-268.355	-54.4488	-152.975	-365.585	112.787	-224.277	45.374	24.6316	-108.898	-159.457	36.2992	112.787	42.7812	-79.0804	98.5264	-66.1164	128.344	-51.856	-318.914	-519.856	-623.568	-356.51	423.923	-296.876	-84.266	90.748	103.712	-212.61	85.5624	-159.457	-140.011	176.31	256.687	347.435	-59.6344	16.8532	-20.7424
192	-190.571	127.047	40.1884	121.862	25.928	37.5956	24.6316	164.643	-303.358	-106.305	191.867	-187.978	-260.576	-54.4488	-151.679	-366.881	108.898	-220.388	40.1884	12.964	-108.898	-158.161	36.2992	112.787	40.1884	-75.1912	99.8228	-68.7092	128.344	-51.856	-321.507	-492.632	-623.568	-356.51	413.552	-290.394	-84.266	92.0444	105.008	-212.61	88.1552	-156.864	-140.011	169.828	257.984	347.435	-59.6344	15.5568	-19.446
193	-191.867	127.047	38.892	119.269	27.2244	36.2992	25.928	164.643	-303.358	-107.601	186.682	-189.274	-260.576	-53.1524	-155.568	-364.288	108.898	-216.499	37.5956	18.1496	-108.898	-155.568	37.5956	111.49	36.2992	-72.5984	103.712	-66.1164	128.344	-50.5596	-315.025	-488.743	-622.272	-356.51	407.07	-281.319	-84.266	93.3408	103.712	-211.313	89.4516	-149.086	-141.308	168.532	260.576	350.028	-59.6344	15.5568	-18.1496
194	-191.867	124.454	37.5956	119.269	25.928	37.5956	25.928	164.643	-300.765	-111.49	181.496	-187.978	-257.984	-49.2632	-152.975	-362.992	107.601	-212.61	38.892	24.6316	-119.269	-136.122	37.5956	114.083	32.41	-82.9696	107.601	-64.82	129.64	-51.856	-305.95	-470.593	-623.568	-356.51	395.402	-270.948	-84.266	93.3408	103.712	-211.313	89.4516	-145.197	-142.604	167.236	259.28	351.324	-59.6344	15.5568	-18.1496
195	-193.164	125.751	41.4848	124.454	25.928	38.892	25.928	165.939	-302.061	-111.49	176.31	-190.571	-257.984	-47.9668	-151.679	-361.696	106.305	-207.424	36.2992	28.5208	-115.38	-140.011	37.5956	116.676	31.1136	-82.9696	115.38	-66.1164	132.233	-50.5596	-291.69	-451.147	-623.568	-356.51	391.513	-251.502	-84.266	94.6372	103.712	-210.017	84.266	-132.233	-143.9	165.939	257.984	352.621	-59.6344	15.5568	-19.446
196	-193.164	127.047	40.1884	125.751	25.928	40.1884	27.2244	168.532	-303.358	-111.49	171.125	-190.571	-255.391	-46.6704	-149.086	-365.585	106.305	-207.424	31.1136	19.446	-110.194	-143.9	37.5956	119.269	28.5208	-88.1552	120.565	-66.1164	133.529	-53.1524	-290.394	-438.183	-622.272	-356.51	392.809	-238.538	-84.266	95.9336	105.008	-211.313	84.266	-129.64	-150.382	164.643	259.28	353.917	-59.6344	15.5568	-18.1496
197	-194.46	128.344	38.892	124.454	25.928	40.1884	28.5208	168.532	-308.543	-108.898	165.939	-190.571	-251.502	-45.374	-149.086	-368.178	103.712	-207.424	28.5208	10.3712	-107.601	-146.493	37.5956	119.269	27.2244	-89.4516	123.158	-64.82	133.529	-54.4488	-291.69	-426.516	-622.272	-356.51	396.698	-226.87	-84.266	97.23	106.305	-212.61	84.266	-124.454	-156.864	158.161	255.391	353.917	-59.6344	15.5568	-22.0388
198	-195.756	128.344	41.4848	125.751	24.6316	38.892	42.7812	152.975	-309.84	-107.601	160.754	-190.571	-241.13	-40.1884	-150.382	-373.363	103.712	-207.424	25.928	0	-103.712	-150.382	38.892	120.565	25.928	-89.4516	125.751	-66.1164	134.826	-55.7452	-295.579	-416.144	-622.272	-356.51	400.588	-220.388	-85.5624	98.5264	106.305	-212.61	81.6732	-114.083	-165.939	155.568	250.205	351.324	-59.6344	15.5568	-25.928
199	-197.053	129.64	42.7812	124.454	25.928	37.5956	42.7812	154.272	-312.432	-105.008	156.864	-190.571	-232.056	-38.892	-147.79	-381.142	103.712	-208.72	19.446	-7.7784	-98.5264	-154.272	38.892	120.565	23.3352	-85.5624	124.454	-70.0056	136.122	-57.0416	-295.579	-408.366	-622.272	-356.51	404.477	-215.202	-85.5624	99.8228	107.601	-213.906	81.6732	-103.712	-181.496	162.05	251.502	351.324	-59.6344	15.5568	-25.928
200	-197.053	128.344	42.7812	124.454	23.3352	36.2992	42.7812	155.568	-313.729	-102.416	154.272	-193.164	-232.056	-37.5956	-149.086	-386.327	103.712	-212.61	20.7424	-12.964	-95.9336	-156.864	38.892	121.862	22.0388	-85.5624	123.158	-72.5984	137.418	-57.0416	-300.765	-390.216	-622.272	-356.51	408.366	-208.72	-85.5624	101.119	108.898	-213.906	80.3768	-92.0444	-197.053	165.939	255.391	350.028	-59.6344	15.5568	-22.0388
[truncated: 17 more columns]

## Sheet: 2C - MSD Average (Plotted)
Source data for Fig. 2C: Plotted Average Mean Squared Displacement (MSD) and SEM. MSD calculated using DiPer software (Gorelik et al 2013) from trajectories shown in Fig. 2B
Control(cKO)				cKO
Time(min)	Avg MSD	MSD SEM		Time(min)	Avg MSD	MSD SEM
5	33.339	4.58742		5	59.7253	10.1353
10	85.8683	12.8469		10	164.796	29.5449
15	150.826	23.367		15	308.097	56.8125
20	222.736	35.5552		20	479.077	89.9139
25	302.213	49.1592		25	672.167	126.805
30	389.098	64.5783		30	884.325	166.454
35	483.066	81.5602		35	1111.67	208.879
40	583.879	100.231		40	1355.13	254.146
45	690.632	120.03		45	1614.22	302.757
50	802.626	140.634		50	1886.72	354.476
55	920.391	161.887		55	2171.17	409.827
60	1043.41	183.917		60	2465.17	468.115
65	1171.88	206.811		65	2770.31	529.771
70	1303.49	230.407		70	3085.95	595.009
75	1437.41	254.422		75	3412.79	663.622
80	1573.89	278.848		80	3750.98	735.85
85	1712.88	303.74		85	4101.36	810.935
90	1856.77	329.454		90	4462.32	888.321
95	2004.34	355.45		95	4832.05	968.27
100	2155.75	381.872		100	5211.75	1051.07
105	2309.66	408.623		105	5600.5	1136.61
110	2464.98	435.923		110	6000.72	1225.33
115	2621.37	463.555		115	6414.49	1318.03
120	2779.77	492.137		120	6838.85	1413.81
125	2940.56	521.31		125	7273.23	1512.63
130	3105	550.947		130	7714.87	1613.81
135	3271.92	581.021		135	8163.14	1716.74
140	3440.61	611.2		140	8619.51	1821.79
145	3610.45	641.738		145	9082.63	1928.45
150	3783.62	672.48		150	9551.64	2036.35
155	3959.35	703.159		155	10025.1	2145.19
160	4137.78	733.843		160	10499.2	2254.35
165	4315.42	764.023		165	10974.3	2364.16
170	4493.16	794.037		170	11452.7	2474.59
175	4671.94	823.94		175	11932.9	2585.9
180	4850.01	853.682		180	12410.8	2697.32
185	5028.61	883.54		185	12888.5	2809.13
190	5206.29	912.835		190	13367.1	2920.94
195	5385.38	941.728		195	13847.1	3033.07
200	5564.44	970.425		200	14327.1	3144.51
205	5743.96	999.024		205	14806.2	3256.13
210	5923.78	1027.51		210	15289.3	3368.74
215	6102.85	1056.05		215	15776.1	3481.97
220	6281.43	1084.29		220	16266.6	3595.96
225	6459.44	1112.16		225	16759	3710.09
230	6635.38	1139.54		230	17251.7	3825.13
235	6812.23	1166.68		235	17747.3	3941.44
240	6990.33	1193.23		240	18242.5	4058.85
245	7166.61	1219.58		245	18738.2	4177.09
250	7339.94	1245.45		250	19228.7	4295.93
255	7509.26	1271.31		255	19719.5	4415.82
260	7675.02	1296.67		260	20207.2	4536.24
265	7841.43	1322.12		265	20690.6	4656.35
270	8005.77	1347.07		270	21169.2	4775.91
275	8169.52	1372.06		275	21641.3	4895.05
280	8332.45	1397.35		280	22109.5	5013.39
285	8494.27	1422.36		285	22572.9	5130.09
290	8658.28	1448.96		290	23028.3	5244.74
295	8825.39	1475.85		295	23478.7	5358.96
300	8994.06	1503.18		300	23926.2	5472.99
305	9163.65	1531.18		305	24368	5586.6
310	9334.72	1559.87		310	24807.4	5699.8
315	9508.16	1589.66		315	25248.6	5812.72
320	9682.52	1619.91		320	25686.8	5925.24
325	9859.74	1650.35		325	26128.9	6038.07
330	10041.8	1681.07		330	26565.9	6149.86
335	10227.7	1712.45		335	27004.2	6262.55
340	10416.1	1744.11		340	27440.5	6375.77
345	10602.8	1775.63		345	27873.4	6489.36
350	10788.3	1807.11		350	28301.8	6603.13
355	10974.4	1838.55		355	28726.8	6717.1
360	11162	1869.93		360	29148.4	6832.75
365	11349.4	1900.88		365	29569.1	6947.96
370	11533.4	1930.29		370	29989	7062.76
375	11714.5	1958		375	30403.6	7174.41
380	11895.7	1985.42		380	30819.7	7285.31
385	12076.2	2012.46		385	31238.1	7395.82
390	12259.2	2039.58		390	31655.4	7505.17
395	12445.4	2066.85		395	32076.9	7613.92
400	12632.9	2094.36		400	32495.2	7720.83
405	12818.6	2122.07		405	32909.6	7823.98
410	13005.1	2150.17		410	33317.3	7923.6
415	13192.7	2178.4		415	33718.6	8019.2
420	13381.5	2206.97		420	34108.7	8110.22
425	13572.3	2235.55		425	34493.5	8196.93
430	13764.8	2263.38		430	34880.3	8280.6
435	13958.8	2291.01		435	35271.2	8362.1
440	14151.9	2318.04		440	35665.9	8441.95
445	14349.6	2345.08		445	36061.7	8519.18
450	14549.3	2372.2		450	36456.7	8594.32
455	14750.1	2399.39		455	36861.9	8670.25
460	14952.7	2426.81		460	37250.5	8743.72
465	15154.5	2454.33		465	37633.1	8814.59
470	15353.6	2479.84		470	38015.3	8882.74
475	15550.6	2505.28		475	38398.6	8948.88
480	15746.5	2531.04		480	38775.5	9012.8
485	15943.9	2557.13		485	39143.3	9074.75
490	16138.6	2582.48		490	39511.7	9135.24

## Sheet: 2C - MSD Individual Cells
Control(cKO) MSD																																									cKO MSD
cell# 1	cell# 2	cell# 3	cell# 4	cell# 5	cell# 6	cell# 7	cell# 8	cell# 9	cell# 10	cell# 11	cell# 12	cell# 13	cell# 14	cell# 15	cell# 16	cell# 17	cell# 18	cell# 19	cell# 20	cell# 21	cell# 22	cell# 23	cell# 24	cell# 25	cell# 26	cell# 27	cell# 28	cell# 29	cell# 30	cell# 31	cell# 32	cell# 33	cell# 34	cell# 35	cell# 36	MSD avg	MSD sem				cell# 1	cell# 2	cell# 3	cell# 4	cell# 5	cell# 6	cell# 7	cell# 8	cell# 9
38.0014	5.15175	15.5819	27.7688	21.4769	13.2932	7.36447	14.3573	9.32382	12.0095	7.44892	21.4938	14.9063	111.447	22.8873	18.4703	49.5497	34.5927	54.1272	70.3594	111.692	47.2441	15.3286	44.3304	8.79176	71.7951	16.6038	33.7566	64.5996	16.3674	37.194	18.8419	24.5088	44.3304	4.20586	71.0012	33.339	4.58742				30.4979	12.1193	11.5534	114.141	132.045	17.4146	67.1079	41.0873	106.937
109.848	15.7795	42.4662	71.1646	49.087	31.0072	16.5858	27.9684	17.1291	32.6794	16.9338	54.2223	40.7261	325.172	66.1566	48.9257	139.282	83.7441	122.06	218.137	308.247	114.989	40.0216	98.4625	26.2199	219.614	54.5448	91.2985	158.448	36.3377	69.798	52.4058	59.5359	119.657	10.8988	101.705	85.8683	12.8469				48.7133	24.8957	29.5218	204.666	260.128	55.7756	156.106	132.644	297.679
193.747	31.3438	72.9932	129.18	76.7555	51.2642	28.3834	40.6684	28.8014	56.2208	26.4553	93.1525	72.4046	590.634	118.84	87.4537	245.026	129.649	184.599	426.297	513.666	195.169	71.4661	161.667	50.9059	435.298	110.659	164.457	282.026	57.91	94.5602	94.0398	106.93	221.147	19.9631	166.009	150.826	23.367				74.1545	40.1651	53.4482	273.281	437.866	110.172	256.56	257.635	527.23
288.943	51.8859	108.273	197.785	103.343	73.8544	41.3989	57.065	44.3744	80.5599	36.5714	132.977	109.38	908.882	172.318	129.23	353.846	180.362	257.363	684.017	687.49	275.113	107.853	231.493	82.7464	704.888	182.299	256.763	433.771	79.7624	117.037	140.995	160.52	339.115	30.8863	175.345	222.736	35.5552				107.803	58.7628	83.1838	318.912	610.274	179.118	365.465	406.186	774.267
399.034	76.9998	145.519	276.282	125.359	99.6239	55.3754	77.2583	63.6407	105.123	47.4547	172.452	151.336	1287.94	225.733	177.046	460.094	236.05	339.975	974.572	800.568	347.861	147.82	308.982	119.387	1020.91	270.128	363.004	601.717	105.967	149.552	194.344	220.51	467.066	43.3005	221.682	302.213	49.1592				147.672	79.6716	118.24	382.413	775.496	265.121	475.625	580.144	1036.51
524.425	106.669	185.236	363.402	147.421	130.658	71.1332	99.5744	88.061	130.597	59.9404	211.208	202.51	1716.09	279.066	230.145	565.756	295.535	423.265	1308.2	862.608	418.976	191.473	398.765	161.499	1379.74	372.074	478.354	809.512	137.58	192.002	253.068	288.483	608.206	58.1645	258.145	389.098	64.5783				192.944	102.208	158.475	464.666	949.526	365.291	603.632	778.134	1301.66
663.517	139.877	229.884	456.458	169.824	163.851	88.4737	124.778	116.026	157.137	72.0242	249.703	259.709	2177.65	338.743	289.612	674.36	359.503	500.869	1674.82	915.372	495.488	236.519	494.295	209.394	1767.42	487.659	607.038	1034.48	171.592	235.344	315.702	360.452	761.919	74.3841	316.52	483.066	81.5602				241.821	127.599	204.108	518.355	1127.13	480.118	737.85	996.862	1568.11
812.688	176.425	277.64	555.018	180.355	198.081	106.371	155.994	145.569	185.66	83.8663	291.366	321.189	2669.5	403.689	348.989	786.528	433.626	588.482	2076.4	981.02	581.655	283.19	585.27	262.672	2184.67	613.596	748.88	1287.08	210.668	277.098	382.427	433.775	927.808	92.576	369.822	583.879	100.231				296.807	156.423	254.435	553.443	1327.15	610.2	898.37	1236.99	1849.95
972.019	216.223	326.909	661.588	195.862	233.734	127.413	188.875	178.598	217.059	96.1404	336.095	387.756	3179.2	474.718	409.956	900.012	514.368	674.936	2498.51	1052.07	675.763	330.631	674.171	321.374	2633.26	750.838	904.86	1564.49	249.027	316.728	456.284	509.519	1094.85	112.56	426.375	690.632	120.03				354.459	187.705	308.387	590.701	1537.35	755.159	1080.97	1499.48	2148.16
1141.73	258.874	370.646	772.552	215.911	271.576	149.269	221.006	213.744	250.355	107.924	388.47	460.18	3697.9	548.459	473.9	1026.87	595.367	755.436	2930.42	1122.16	782.671	382.242	761.557	386.099	3105.71	898.796	1072.56	1869.07	290.054	353.928	536.677	588.494	1274.4	133.585	485.939	802.626	140.634				414.259	219.502	364.861	636.401	1753.53	912.71	1271.54	1780.68	2455.15
1319.41	305.256	412.205	887.901	240.342	314.985	172.049	257.14	252.391	285.293	120.305	448.645	539.41	4218.23	622.758	536.866	1157.51	679.829	838.886	3375.07	1192.96	893.627	434.933	853.105	457.538	3599.36	1058.63	1258.33	2210.81	333.401	395.149	623.753	673.675	1455.77	155.803	552.748	920.391	161.887				479.487	254.961	423.631	678.85	1966.17	1084.58	1467.57	2078.17	2752.64
1500.45	354.582	452.382	1006.43	265.981	360.321	196.654	295.187	291.432	319.878	132.915	515.147	626.302	4742.42	697.239	596.23	1292.59	770.079	933.773	3832.98	1269.67	1018.33	489.419	940.236	534.054	4116.35	1232.49	1459.88	2585.92	381.624	438.767	715.145	761.711	1639.22	178.65	618.382	1043.41	183.917				546.545	292.094	483.724	728.599	2179.75	1270.9	1666.07	2389.6	3035.38
1686.5	406.646	492.908	1129.41	290.933	406.026	222.844	335.187	332.149	351.634	147.286	585.541	720.416	5269.55	766.504	658.573	1440.82	866.228	1042.8	4310.07	1349.77	1147.34	547.183	1024.66	615.092	4657.29	1419.39	1667.17	2996.98	432.898	483.651	810.973	852.316	1825.9	202.065	692.815	1171.88	206.811				611.947	330.325	545.295	792.154	2406.53	1471.85	1870.05	2714.02	3298.56
1875.58	461.285	538.062	1256.16	306.168	452.005	251.33	375.78	375.246	382.204	163.069	660.361	821.884	5792.16	829.158	720.341	1586.78	969.393	1169.53	4801.23	1425.79	1263.89	604.945	1097.3	700.733	5226.95	1620.14	1883.08	3434.28	487.001	536.363	911.33	944.455	2008.66	225.786	767.336	1303.49	230.407				679.22	370.439	607.683	858.308	2643.28	1684.36	2077.29	3047	3576.1
2062.59	518.241	578.453	1384.09	322.013	500.035	281.705	417.056	418.292	411.487	179.812	741.286	930.273	6304.85	888.838	779.378	1742.33	1078.84	1307.91	5299.95	1478.43	1378.76	663.631	1162.95	791.006	5813.61	1830.93	2109.56	3896.98	541.779	589.055	1015.83	1039.03	2189.9	249.863	848.057	1437.41	254.422				752.677	413.177	670.29	909.797	2893.93	1908.72	2291.29	3387.86	3860.62
2252.89	578.711	618.069	1517.83	334.751	551.035	313.57	458.91	462.992	440.861	197.331	827.329	1044.88	6808.2	952.108	840.582	1902.2	1194.49	1449.29	5802.22	1513.65	1492.02	716.442	1221.53	886.143	6416.75	2051.71	2341.41	4385.98	598.422	645.161	1125.21	1134.52	2376.05	274.842	931.995	1573.89	278.848				825.274	457.649	733.651	947.194	3149.27	2144.07	2505.73	3738.69	4151.33
2449.13	641.201	657.943	1651.39	349.374	602.638	346.444	502.772	505.344	469.894	214.775	916.911	1165.26	7307.64	1014.58	905.762	2068.2	1311.76	1591.26	6295.91	1545.55	1608.31	766.102	1270.34	986.194	7039.62	2284.6	2574.99	4903.92	656.07	696.488	1239.79	1235.06	2565.49	300.176	1022.76	1712.88	303.74				898.651	503.755	796.648	1015.45	3408.43	2390.42	2726.06	4100.66	4458.11
2656.38	705.542	697.896	1789.81	363.187	655.806	379.763	546.776	547.662	499.616	233.343	1010.08	1286.73	7817.09	1075.82	973.624	2239.76	1429.79	1732.75	6787.68	1605.43	1731.54	814.443	1309.81	1092.1	7681.71	2528.5	2815.04	5461.64	716.272	753.588	1361.22	1340.46	2757.45	326.471	1118.92	1856.77	329.454				975.54	551.448	858.278	1095.72	3662.72	2648.99	2954.03	4466.94	4795.51
2867.49	771.197	741.038	1930.57	378.815	710.118	413.162	591.506	591.098	529.703	252.469	1108.03	1413.21	8326.5	1129.89	1045.4	2414.64	1555.16	1870.14	7263.44	1701.03	1860.24	856.659	1345.41	1202.58	8336.16	2782.56	3054.72	6050.03	779.851	818.432	1490.81	1449.75	2950.44	353.002	1221.14	2004.34	355.45				1051.4	600.392	919.196	1164.41	3921.33	2918.92	3193.86	4841.57	5123.42
3085.38	839.066	782.661	2067.87	401.788	766.975	447.446	638.648	635.679	560.162	272.191	1208.46	1546.35	8830.48	1183.83	1120.72	2596.66	1684.2	1999.5	7735.01	1831.14	1997.84	900.858	1373.35	1317.8	9006.26	3043.11	3297.79	6668.69	842.166	882.791	1627.77	1564.7	3147.97	379.856	1321.85	2155.75	381.872				1134.07	651.16	977.533	1209.48	4174.29	3198.64	3449.06	5218.58	5420.07
3308.98	909.787	824.487	2204.1	427.844	827.736	481.54	687.622	682.505	592.285	291.382	1313.61	1683.48	9328	1231.83	1199.1	2797.72	1805.47	2139.28	8197.32	1948.79	2149.5	948.639	1394.67	1436.64	9684.22	3308.38	3544.55	7319.09	906.285	945.419	1771.53	1678.71	3346.72	407.366	1423.12	2309.66	408.623				1217.07	703.461	1034.05	1263.5	4438.14	3489.97	3705.83	5601.82	5702.04
3540.19	981.567	868.756	2337.2	448.857	890.595	516.112	739.676	730.914	627.044	311.204	1424.64	1825.22	9836.06	1276.04	1278.74	3007.1	1928.81	2274.54	8649.7	2034.16	2305.51	997.845	1413.73	1559.05	10373.2	3573.1	3799.58	7992.94	974.156	1005.12	1916.73	1796.84	3542.79	435.261	1526.48	2464.98	435.923				1303.38	757.691	1088.2	1346.94	4705.36	3792.22	3966.15	5989.96	5969.75
3777.15	1055.27	912.974	2469.6	474.618	953.253	552.479	792.423	779.158	662.054	333.301	1542.83	1969.44	10332	1317.06	1358.95	3226.29	2063.92	2394.01	9099.93	2092.35	2459.21	1046.65	1430.19	1684.42	11073.7	3842.44	4060.33	8689.04	1045.89	1061.75	2063.95	1916.38	3738.66	464.81	1632.84	2621.37	463.555				1390.07	811.11	1140.46	1415.67	4968.72	4102.49	4228.76	6388.14	6224.67
4016.99	1130.75	955.862	2600.64	490.178	1016.84	590.215	845.158	827.597	694.635	354.513	1665.6	2116.16	10840.9	1363.15	1441.73	3435.94	2199.16	2514.39	9558.88	2142.36	2609.9	1096.36	1456.06	1810.8	11788.9	4104.16	4327.15	9415.34	1118.88	1111.26	2214.65	2038.38	3945.56	495.42	1737.08	2779.77	492.137				1482.77	866.061	1190.58	1480.3	5235.7	4419.72	4490.51	6795.84	6468.31
4262.85	1208.51	998.519	2729.14	509.997	1082.71	628.814	901.685	877.118	727.108	376.37	1794.29	2268.49	11359.5	1409.58	1526.48	3634.7	2331.77	2647.42	10015	2197.73	2753.85	1147.97	1483.41	1940.98	12519.9	4359.61	4595.57	10160.5	1186.75	1151.85	2370	2162.44	4164.34	526.63	1848.45	2940.56	521.31				1577.71	920.767	1239.39	1540.43	5504.12	4743.98	4762.94	7207.41	6706.1
4512.9	1288.93	1043.32	2859.3	531.898	1152.04	666.408	957.509	929.015	759.114	397.938	1926.6	2425.17	11884.6	1458.97	1613.08	3827.91	2465.51	2789.94	10468	2277.54	2902.51	1200.86	1512.57	2074.63	13260.9	4621.17	4866.78	10928.1	1254.96	1187.89	2530.23	2286.86	4386.33	558.556	1972.05	3105	550.947				1681.11	975.783	1284.1	1613.14	5782.26	5073.16	5030.17	7626.19	6914.94
4767.34	1370.87	1089.01	2994.24	553.605	1222.37	706.428	1015.18	980.413	790.635	420.173	2060.89	2586	12413.8	1508.14	1701.47	4027.11	2602	2933.14	10923.3	2385.17	3060.07	1253.98	1539.58	2211.77	14003.5	4899.33	5109.2	11723.5	1321.53	1212.66	2693.17	2421.66	4601.92	590.201	2095.7	3271.92	581.021				1789.9	1019.97	1326.61	1690.57	6068.38	5408.3	5306.88	8056.66	7089.04
5024.84	1455.13	1137.4	3129.18	577.06	1295.27	748.399	1075.8	1031.07	821.273	443.399	2203.43	2749.37	12952.1	1551.5	1794.33	4247.78	2728.47	3088.19	11356.3	2507.13	3228.77	1300.94	1571.09	2352.04	14741.5	5183.55	5349.43	12538.1	1391.72	1230.69	2861.73	2558.63	4805.34	621.832	2209.04	3440.61	611.2				1904.25	1062.55	1369.14	1773.93	6352.35	5746	5578.72	8508.61	7254.09
5286.19	1540.41	1191.11	3265.08	602.254	1367.54	790.968	1138.43	1080.99	852.258	465.61	2351.58	2914.29	13528.8	1589.87	1892.33	4487.8	2845.92	3236.22	11783.1	2632.52	3407.74	1348.95	1607.97	2495.28	15455.2	5461.76	5587.45	13367.9	1451.69	1237.69	3037.56	2698.78	5007.37	652.339	2315.23	3610.45	641.738				2024.45	1103.04	1410.39	1861.99	6653.73	6084.85	5851.74	8977.65	7399.72
5557.87	1627.25	1247.06	3405.24	628.544	1440.01	834.859	1200.92	1127.77	882.857	488.299	2508.85	3081.72	14124.6	1629.76	1992.88	4748.19	2965.04	3367.58	12212.3	2748.48	3600.87	1397.62	1673.05	2641.02	16146.8	5744.66	5817.69	14220.5	1512.9	1250.25	3221.26	2840.56	5209.98	682.879	2430.31	3783.62	672.48				2144.99	1144.7	1448.37	1945.7	6963.3	6423.61	6140.68	9462.59	7526.67
5837.95	1717.97	1301.47	3554.25	658.08	1516.82	881.299	1263.17	1175.26	912.286	512.162	2668.98	3253.18	14725	1670.07	2099.17	5021.4	3092.08	3480.37	12641.2	2875.69	3805.62	1446.29	1735.07	2790.07	16808.1	6035.7	6044.4	15093.1	1570.27	1260.02	3410.19	2986.16	5423.71	713.373	2556.44	3959.35	703.159				2272.01	1186.77	1484.72	2012.41	7294.52	6763.23	6428.91	9956.61	7645.3
6105.59	1810.42	1353.44	3704.66	687.017	1594.76	927.75	1329.56	1222.96	940.435	536.959	2836.62	3430.19	15322.6	1715.05	2208.23	5297.57	3220.96	3613.08	13074	3008.87	4013.53	1495.02	1806.86	2940.55	17447.1	6334.55	6273.66	15991.8	1628.38	1275.4	3602.81	3135.71	5643.89	743.669	2686.57	4137.78	733.843				2399.76	1228.04	1519.72	2068.16	7654.38	7102.85	6705.43	10455.7	7759.89
6360.01	1905.49	1403.3	3859.37	714.771	1672.29	975.876	1396.72	1269.06	967.462	562.022	3011.39	3610.79	15877.6	1763.04	2318.23	5571.89	3344.68	3738.73	13498.9	3151.57	4210.14	1544.05	1884.32	3092.49	18065.2	6638.55	6498.09	16916.4	1684.95	1293.29	3800.51	3286.14	5876.08	773.593	2818.38	4315.42	764.023				2532.47	1271.18	1553.92	2123.41	8030.41	7444.6	6953.05	10957.4	7879.72
6605.47	2002.51	1454.92	4016.83	741.3	1749.95	1016.36	1465.62	1315.26	993.833	586.76	3188.38	3794.53	16419.4	1815.35	2432.76	5854.26	3473.71	3867.25	13909.4	3298.24	4393.66	1592.02	1976.22	3248.78	18666.1	6940.7	6710.86	17867.2	1738.44	1312.81	4005.71	3438.26	6109.46	803.19	2948.44	4493.16	794.037				2673.83	1312.25	1591.51	2173	8432.73	7786.12	7200.56	11458.1	8007.54
6844.46	2101.34	1507.72	4179.67	770.707	1829.39	1062.19	1533.98	1362.38	1022.8	611.085	3371.57	3983.04	16967.6	1870.36	2557.08	6146.55	3606.05	3994.63	14304.8	3439.75	4562.58	1641.45	2082.62	3407.77	19239.2	7236.94	6916.02	18843.3	1790.4	1323.15	4218.37	3592.8	6350.18	831.108	3086.9	4671.94	823.94				2813.73	1354.47	1626.69	2230.38	8837.34	8123.9	7452.85	11958.4	8143.16
7086.81	2203.04	1558.93	4343.2	799.642	1911.47	1108.83	1605.75	1409.23	1053.93	636.26	3558.87	4176.02	17525.5	1926.63	2688.16	6400.83	3740.12	4122.95	14689.2	3565.95	4728.46	1689	2199.45	3569.49	19774.1	7529.33	7104.4	19845.3	1837.97	1336.49	4434.6	3751.88	6603.38	858.445	3226.77	4850.01	853.682				2959.77	1397.58	1661.17	2279.6	9230.75	8455.9	7698.78	12464.2	8279.49
7333.67	2305.18	1609.47	4508.22	831.47	1995.16	1156.46	1664.16	1456.31	1088.82	661.342	3752.93	4370.83	18074.6	1986.08	2830.46	6653.68	3879.82	4244.28	15082.8	3679.24	4898.02	1735.16	2328.36	3733.96	20286	7820.48	7279.07	20872.1	1885.84	1350.55	4655.08	3901.06	6864.05	885.333	3369.7	5028.61	883.54				3108.58	1442.96	1695.8	2330.85	9654.31	8783.25	7955.11	12979.1	8417.4
7579.19	2408.23	1660.09	4666	858.212	2079.04	1205.2	1722.87	1503.2	1128.17	685.437	3951.91	4566.77	18569.6	2044.98	2975.5	6916.74	4026.93	4360.53	15477.8	3788.13	5076.86	1780.03	2464.86	3900.61	20771.1	8116.44	7435.97	21918.6	1929.61	1367.1	4882.15	4054.65	7129.73	911.723	3512.43	5206.29	912.835				3261.69	1487.79	1731.25	2392.1	10106.8	9105.58	8204.74	13503.6	8567.06
7826.55	2509.75	1712.35	4830.89	882.938	2163.54	1254.77	1783.89	1549	1167.14	710.478	4159.36	4765.09	19023.8	2109.82	3114.66	7215.66	4176.55	4486.77	15861.5	3897.39	5259.71	1823.77	2614.8	4068.69	21233.3	8420.82	7579.15	22985.1	1973.53	1380.29	5119.53	4209.71	7403.47	939.767	3660.01	5385.38	941.728				3418.94	1532	1766.8	2452.45	10538.2	9419.68	8458.21	14035.2	8731.18
8064.09	2611.48	1765.44	4990.54	908.414	2248.08	1303.97	1847.27	1596.45	1207.04	735.275	4373.76	4966.2	19462.9	2177.75	3257.6	7538.66	4328.27	4611.88	16225.5	4010.37	5446.84	1865.84	2768.02	4238.49	21665.7	8726.2	7711.11	24075.7	2015.66	1386.82	5360.56	4367.23	7683.06	968.959	3808.82	5564.44	970.425				3579.03	1576.31	1802.37	2519.04	11056.2	9720.12	8703.18	14578.2	8906.49
8296.32	2712.75	1825.26	5157.55	935.606	2336.88	1351.28	1907.53	1644.92	1246.55	760.3	4596.39	5167.67	19890.7	2249.66	3406.01	7871.75	4477.31	4727.48	16572.4	4148.51	5632.39	1908.95	2898.48	4413.24	22083.8	9035.61	7837.54	25178.8	2058.54	1398.37	5604.84	4527.27	7964.55	999.143	3958.17	5743.96	999.024				3746.46	1617.27	1837.9	2571.01	11559.6	10015.2	8925.1	15127.4	9103.44
8512.45	2813.67	1888.49	5336.71	965.886	2426.68	1398.81	1970.26	1691.98	1285.07	785.727	4818.32	5369.97	20301.3	2323.6	3552.89	8221.73	4625.83	4831.42	16897.5	4300.65	5813.72	1948.83	3052.42	4591.95	22493.1	9346.78	7957.71	26297.3	2095.78	1412.22	5848.24	4689.23	8249.95	1029.03	4111.07	5923.78	1027.51				3912.16	1657.26	1872.58	2611.55	12106.5	10300.2	9135.15	15688.2	9340.56
8719.93	2913.43	1949.71	5528.35	988.823	2517.37	1444.47	2036.3	1738.23	1324.05	812.398	5046.78	5574.21	20689	2397	3696.34	8577.17	4782.5	4926.84	17207.6	4437.3	5985.03	1989.03	3209.74	4774.1	22882.1	9661.49	8093.67	27437	2125.01	1419.79	6091.98	4859.7	8542.41	1059.08	4264.64	6102.85	1056.05				4080.25	1698.23	1907.46	2645.18	12663.4	10569.1	9332.55	16265.1	9605.9
8925.8	3013.4	2008.93	5728.9	1012.5	2606.29	1486.9	2098.44	1785.98	1365.11	838.797	5281.84	5774.81	21038.2	2470.08	3837.65	8944.87	4942.06	5024.47	17509.8	4562.84	6157.64	2027.34	3368.03	4958.76	23243	9979.62	8242.26	28589.4	2155.36	1423.01	6340.22	5036.36	8841.97	1089.61	4421.01	6281.43	1084.29				4252.12	1738.85	1940.38	2675.48	13251.7	10826.5	9545.13	16855.5	9908.58
9137.66	3114.46	2067.83	5926.74	1041.46	2700.56	1528.92	2160.65	1831.97	1409.67	866.187	5522.6	5975.91	21356.3	2546.94	3975.98	9324.2	5099.09	5111.41	17787.9	4680.56	6329.98	2056.56	3521.92	5148	23573.4	10298.9	8417.38	29752.7	2188.62	1425.7	6589.35	5218.12	9153.46	1121.73	4576.91	6459.44	1112.16				4420.55	1778.52	1972.61	2697.18	13844	11082.8	9758.76	17447.1	10226.2
9366.89	3216.18	2121.32	6127.04	1079.94	2793.51	1569.87	2223.45	1880.91	1456.24	893.202	5769.68	6177.51	21636.8	2628.51	4115.7	9660.79	5242.01	5196.12	18035.3	4793.67	6505.67	2082.09	3672.58	5339.86	23879.6	10624.5	8604.94	30927.7	2221.36	1424.89	6843.87	5404.71	9465.87	1155.27	4736.15	6635.38	1139.54				4594.87	1814.11	2004.48	2711.85	14425.7	11325.8	9966.86	18044.4	10568.8
9610	3317.83	2175.52	6336.96	1118.56	2880.65	1611.27	2285.85	1929.18	1505.34	921.47	6020.1	6383.36	21883.7	2715.88	4257.42	10013.6	5386.73	5279.82	18254.4	4932.42	6690.66	2105.01	3822.69	5532.63	24159.1	10958.3	8805.13	32120.5	2252	1422.57	7097.87	5587.38	9778.51	1191.57	4896.47	6812.23	1166.68				4773.35	1847.02	2036.59	2729.14	15020.2	11556.7	10182.4	18646	10906.4
9854.89	3418.54	2230.97	6559.83	1162.92	2958.62	1653.31	2350.05	1977.61	1555.04	950.465	6275.26	6592.81	22094.4	2807	4395.94	10369.7	5542.92	5358.56	18454.1	5140.58	6859.19	2129.67	3964.9	5728.25	24409.9	11295.3	9019.7	33314.5	2287.84	1417.98	7362.61	5779.4	10092.8	1229.81	5056.52	6990.33	1193.23				4970.92	1880.08	2065.81	2741.97	15564.4	11777.9	10388.4	19259.3	11274.9
10105	3518.11	2285.77	6783.34	1202.08	3037.13	1692.96	2419.08	2029.26	1604.17	981.078	6535.3	6801.58	22280.3	2901.19	4535.6	10715.3	5698.46	5420.44	18638.3	5349.34	7001.32	2155.13	4101.73	5928.28	24631.5	11642.1	9233.69	34516.9	2325.26	1417.58	7637.02	5976.37	10413.9	1269.78	5213.69	7166.61	1219.58				5141.51	1915.05	2093.9	2761.19	16074.3	11988	10601.3	19881.8	11676.1
10362.3	3616.8	2340.52	7011.12	1240.43	3117.31	1728.51	2489.76	2081.24	1653.02	1012.77	6801.98	7011.29	22426.3	2995.27	4682.13	11048.4	5863.7	5456.89	18820.9	5548.72	7150.2	2182.96	4234.44	6132.16	24796	11997.8	9436.69	35731.8	2353.78	1421.28	7914.58	6175.57	10716.8	1312.09	5372.15	7339.94	1245.45				5313.3	1947.82	2121.24	2724.5	16554.2	12186.4	10818.9	20505.4	12127.2
10616	3712.29	2397.1	7242.28	1279.87	3198.02	1758.59	2556.58	2132.75	1701.35	1043.54	7074.35	7218.05	22552.9	3089.77	4807.54	11346.6	6043.11	5492.61	18998.6	5715.91	7302.09	2204.63	4351.18	6340.82	24918.7	12370.6	9632.92	36959.3	2384.36	1425.94	8196.58	6371.66	11012.3	1354.39	5529.99	7509.26	1271.31				5490.03	1980.7	2146.3	2752.27	16996.7	12376.1	11037.6	21128.1	12593.9
10873.7	3806.35	2447.93	7474.02	1317.23	3280.12	1783.91	2625.59	2186.33	1750.1	1074.03	7354.72	7424.4	22649.5	3186.25	4935.16	11636.9	6235.15	5520.7	19172.2	5857.8	7451.65	2229	4455.14	6554.14	24973.7	12744.9	9830.67	38190.9	2414.54	1431.53	8488.71	6551.82	11304.6	1396.43	5690.78	7675.02	1296.67				5670.52	2012.18	2170.09	2787.11	17446.4	12555.3	11243.3	21737.5	13076.2
11144.5	3901.62	2494.77	7707.82	1352.7	3360.16	1814.91	2698.19	2242.38	1800.51	1105.5	7644.59	7629.03	22725.4	3286.93	5059.57	11943.7	6429.23	5546.85	19355.8	6007.67	7596.03	2252.6	4557.19	6771.32	24987.6	13117.8	10031.7	39433	2448.53	1438.55	8787.99	6733.31	11593.8	1437.4	5852.79	7841.43	1322.12				5859.3	2042.92	2193.21	2829.2	17868.2	12722.8	11450.4	22337.2	13588.9
11421.3	3997.51	2541.24	7936.55	1396.12	3441.46	1848.15	2771.56	2297.98	1851.79	1138.49	7941.89	7831.88	22731.8	3388.51	5190.86	12256.8	6619.77	5567.85	19536	6182.45	7738.72	2273.84	4661.65	6992.22	24958.6	13485.2	10233.9	40688.7	2484.87	1444.22	9090.21	6909.6	11860.4	1480.17	6015.6	8005.77	1347.07				6054.76	2072.22	2215.88	2870.77	18329.4	12878.6	11642.6	22925	14135.3
11711.6	4095.03	2584.2	8166.5	1441.68	3524.91	1882.46	2845.64	2354.99	1904.48	1173.78	8244.38	8035.49	22709.9	3491.94	5318.51	12581.4	6813.44	5599.01	19722	6368.32	7884.84	2297.85	4770.13	7219.19	24881.3	13860	10431.1	41959.6	2521.37	1444.01	9392.16	7073.53	12092.9	1525.33	6179.63	8169.52	1372.06				6246.78	2102.79	2239.72	2900.3	18821.9	13025.6	11821.1	23490.4	14720.3
12013.3	4194.06	2624.82	8401.06	1492.13	3610.21	1915.8	2918.41	2415.26	1957.58	1210.71	8555.4	8235.5	22690	3594.87	5447.54	12906.3	7012.56	5625.57	19908.4	6539.23	8043.87	2328.46	4876.75	7447.87	24771.6	14246.9	10620.5	43233.5	2545.86	1446.26	9698.93	7215.05	12306.8	1571.07	6346.39	8332.45	1397.35				6444.2	2133.13	2262.86	2920.74	19332.2	13161.6	12023.3	24043.3	15335.4
12335.9	4294.21	2668.78	8634.61	1542.26	3691.05	1948.71	2991.47	2475.51	2011.08	1248.28	8878.84	8435.63	22689.3	3697.88	5580.91	13228.6	7215.4	5646.02	20092.4	6686.39	8199.2	2367.01	4985.51	7675	24623	14652.2	10810.8	44475.3	2567.18	1445.6	10007.7	7350.28	12507.9	1618.68	6515.07	8494.27	1422.36				6643.51	2161.85	2283.91	2942.68	19830.1	13290.2	12219.1	24585.4	15953.8
12673.7	4397.97	2710.66	8860.06	1585.64	3769.5	1984.09	3069.97	2538.12	2063.31	1286.6	9204	8636.92	22703.3	3801.8	5716.63	13533.5	7423.82	5666.84	20275.8	6815.24	8354.14	2410.1	5093.22	7904.66	24472.7	15068.7	11002.1	45769	2600.22	1448.97	10320.9	7480.1	12704.8	1667.8	6683.28	8658.28	1448.96				6844.11	2189.62	2302.31	2972.5	20330.5	13414.2	12424.3	25126.2	16563.9
13011.8	4503.45	2750.97	9087.58	1630.66	3846.31	2018.82	3152.74	2602.81	2117.63	1323.91	9528.21	8841.74	22694.3	3906.24	5853.49	13831.5	7627.88	5705.73	20453.2	6958.18	8499.99	2456.71	5205.58	8137.22	24316.3	15495.8	11196.3	47071.4	2632.5	1460.17	10637.7	7665.82	12917.2	1719.11	6855.4	8825.39	1475.85				7049.04	2216.55	2317.24	3001.86	20820.8	13541	12639.6	25665	17167.3
13356.9	4609.33	2791.64	9310.63	1675.54	3923.05	2051.43	3237.42	2669.83	2171.02	1360.34	9854.82	9047.13	22680.4	4013.29	5990.05	14162.8	7841.71	5752.57	20626.6	7116.52	8645.17	2506.23	5324.15	8368.74	24135.8	15940.5	11394.8	48380.8	2667.74	1463.18	10959.5	7855.64	13104.7	1773.27	7022.73	8994.06	1503.18				7255.46	2240.85	2330.84	3036.5	21304.4	13660.8	12867.3	26202.4	17765.3
13711.6	4713.32	2834.49	9534.22	1711.1	3997.81	2084.74	3320.84	2738.61	2225.5	1394.63	10187	9254.46	22667.6	4123.69	6126.68	14518.3	8056.49	5771.43	20793	7285.97	8802.51	2559.99	5447.19	8599.05	23943.3	16388.9	11582.8	49701.4	2706.94	1467.79	11286.8	8050.65	13279.3	1828.47	7194.83	9163.65	1531.18				7462.28	2259	2343.64	3063.41	21787.9	13778.4	13077.3	26746	18346
14076.3	4818.51	2875.85	9753.08	1753.82	4075.13	2119.9	3407.28	2804.96	2279.94	1429.09	10526.9	9462.69	22688.7	4237.57	6257.87	14880	8261.47	5774.99	20952.3	7447.66	8960.68	2616.97	5576.77	8833.39	23736.2	16858.8	11770.4	51024.7	2743.12	1475.7	11621.3	8250.24	13442.3	1884.99	7370.35	9334.72	1559.87				7679.37	2279.79	2355.64	3100.5	22264	13890.3	13245.6	27292.7	18921.4
14463.4	4921.34	2913.27	9974.82	1801.68	4148.13	2154.12	3497.79	2874.26	2333.41	1463.03	10875.4	9669.53	22738	4356.26	6383.84	15245.9	8466.91	5762.57	21139.9	7598.05	9127.96	2676.79	5715.77	9068.58	23506.3	17340.6	11959	52363.5	2779.58	1488.96	11958.3	8415.95	13617.1	1943.67	7550.16	9508.16	1589.66				7895.42	2299	2367.22	3131.34	22756.7	14001.9	13472.2	27828.1	19505.2
14872.3	5019.67	2947.82	10201.5	1857.33	4218.22	2191.15	3591.33	2940.07	2385.66	1496.92	11229.6	9871.54	22764.8	4479.48	6507.49	15605.1	8649.96	5748.24	21341.7	7754.66	9298.46	2740.49	5868.21	9306.9	23279.6	17829.6	12145.8	53702.7	2817.99	1492.2	12297.5	8589.43	13793.8	2004.08	7729.4	9682.52	1619.91				8110.76	2315.49	2378.73	3133.02	23230.3	14121.1	13701.2	28337.3	20074.4
15299.3	5119.23	2980.15	10432.9	1911.33	4291.64	2229.37	3686.71	3009.05	2439.13	1529.32	11593.1	10073.8	22813.3	4603.26	6631.45	15957.3	8833.2	5757.38	21554.8	7939.47	9465.11	2805.87	6026.35	9548.66	23037.8	18306.4	12357.2	55031.2	2855.42	1490.81	12619.5	8770.82	13972.6	2066.21	7911.66	9859.74	1650.35				8320.95	2332.56	2391.35	3204.82	23724.5	14250	13929.5	28824.4	20632.5
15737	5220.86	3010.66	10667.4	1959.6	4369.99	2269.37	3780.08	3082.67	2491.33	1558.99	11965.2	10277.7	22878.1	4724.7	6748.35	16328.1	9031.85	5793.75	21771.3	8151.02	9638.17	2872.05	6183.1	9795.84	22827.7	18796.5	12569.2	56337.5	2893.77	1496.63	12948.5	8957.49	14148.4	2127.48	8094.92	10041.8	1681.07				8529.79	2344.3	2405.58	3256.58	24220.7	14372.1	14171.3	29304.7	21150.2
16172.2	5321.62	3042.93	10900.6	2001.35	4448.26	2311.61	3875.8	3157.74	2546.8	1587.62	12347.5	10482.7	22959.7	4841.18	6852.26	16739	9242.72	5826.5	21988.6	8383.84	9810.64	2941.65	6345.01	10047.3	22650.4	19296.1	12777.6	57639.6	2937.47	1502.69	13279	9149.18	14320.9	2190.46	8280.12	10227.7	1712.45				8741.29	2356.62	2409.96	3308.98	24736.2	14491.4	14427.4	29767.3	21648.9
16607.5	5421.28	3071.92	11133.6	2048.46	4526.8	2352.51	3974.66	3234.1	2602.44	1617.65	12741.2	10687.9	23061.8	4960.09	6954.02	17128.7	9443.49	5864.27	22205.3	8594.58	9977.59	3018.8	6505.09	10302.4	22514.9	19793.1	12995.4	58925.2	2982.99	1508.91	13615.2	9346.24	14537.9	2255	8469.56	10416.1	1744.11				8930.08	2368.13	2413.89	3374.56	25257.8	14616.3	14701.5	30218.1	22144
17051.1	5523.31	3092.5	11369.7	2081.71	4607.48	2395.34	4079.42	3310.48	2659.99	1649.08	13134.9	10894.4	23143.9	5080.84	7058.04	17531.3	9633.31	5899.26	22413.4	8762.36	10139.3	3105.62	6669.93	10562.6	22413.6	20284.6	13185.6	60191.3	3028.96	1519.82	13948.8	9551.56	14750	2320.17	8658.4	10602.8	1775.63				9121.72	2379.21	2417.29	3432.41	25794.7	14744.9	14992	30654.9	22636.4
17503.7	5621.32	3111.02	11602.5	2131.3	4691.4	2437.18	4186.39	3389.49	2716.26	1683.1	13528.5	11103.3	23249.4	5205.63	7162.48	17922.6	9824.31	5926.53	22590.1	8915.4	10300.4	3193.76	6835.84	10827.2	22331.6	20766.7	13324.3	61449.8	3075.76	1529.21	14278.1	9757.1	14968.6	2387.25	8852.19	10788.3	1807.11				9313.38	2386.95	2419.71	3525.1	26355.8	14873.3	15294.5	31081.3	23133.2
17956.3	5714.56	3119.73	11836.3	2179.82	4778.4	2479.86	4288.91	3475.68	2769.18	1718.46	13923.4	11315	23377.1	5333.64	7269.46	18309.4	10021.5	5971.92	22718.3	9095.93	10447.4	3284.83	7000.44	11096.8	22263.8	21241.7	13464.7	62705	3123.75	1544.25	14602.2	9965.1	15182	2454.38	9048.96	10974.4	1838.55				9508.71	2390.57	2421.35	3591.58	26941.7	15012.2	15606.4	31508.8	23638.8
18415.4	5807.34	3129.51	12067.2	2235.07	4867.24	2524.56	4387.06	3556.83	2820.71	1753.84	14324.4	11521.4	23495.6	5462.52	7374.71	18711.3	10233.7	6051.07	22832.6	9311.09	10572.2	3381.32	7170.09	11366.5	22198	21705.5	13590.9	63959.4	3173.77	1555.06	14930	10178.3	15391.5	2522.77	9253.44	11162	1869.93				9709.24	2393.49	2422.48	3654.89	27537.5	15159.1	15928.9	31934.5	24158.4
18879.4	5901.75	3146.7	12310.4	2297.06	4957.67	2571.7	4491.45	3643.07	2871.77	1790.58	14736.3	11730	23609.8	5588.1	7479.12	19111.6	10446.7	6111.58	22912.1	9576.53	10676.2	3480.42	7332.46	11633.1	22119.9	22166.3	13707.6	65200.5	3224.59	1572.81	15257.4	10393.9	15602.1	2589.83	9458.82	11349.4	1900.88				9917.24	2393.91	2426.14	3735.5	28158.1	15317.4	16263.7	32354.9	24675.7
19353.9	5996.57	3171.57	12567.4	2362.66	5047.95	2620.44	4597.08	3731.33	2922.36	1829.79	15160.1	11937.7	23717.4	5705.67	7577.38	19531	10662.4	6148	22960.9	9850.93	10778.4	3576.43	7465.49	11899.9	22047.6	22608.4	13821.2	66368.1	3269.28	1597.97	15566.1	10612.6	15814.8	2657.75	9665.77	11533.4	1930.29				10137.3	2389.81	2422.3	3820.8	28804.1	15482.1	16616.1	32753	25191.1
19825.1	6092.5	3195.77	12793.8	2435.83	5144.01	2671.96	4709.75	3823.55	2972.35	1870.73	15598.6	12144.6	23828.8	5818.58	7673.94	19951.8	10859.5	6175.49	23018.3	10133.2	10879.4	3669.75	7607.93	12163.7	21980.1	23026.2	13932.6	67455	3313.91	1615.86	15871.7	10838.2	16025.4	2726.52	9876.12	11714.5	1958				10357.1	2386.77	2412.56	3897.23	29436.7	15657.6	16983.7	33169.5	25709.6
20303.4	6190.41	3218.65	13055.4	2517.59	5244.67	2726.26	4814.47	3916.31	3018.26	1913.36	16046.4	12345.8	23942.3	5927.42	7766.12	20385.4	11056.4	6199.44	23059.4	10410.9	10982.1	3760.15	7745.8	12427.9	21907.9	23435.4	14039.6	68519.6	3360.51	1631.64	16188.6	11065.1	16239.7	2794.07	10089.2	11895.7	1985.42				10581.3	2380.32	2411.24	3965.26	30084.6	15838.7	17374.7	33585.2	26234.3
20785.4	6288.53	3240.24	13336.3	2568.95	5349.48	2780.26	4925.37	4006.85	3061.62	1956.13	16504.7	12547	24072.2	6030.35	7853.21	20826.6	11267.6	6225.74	23094.2	10669.1	11076.8	3850.38	7897.13	12691.3	21839.2	23840.1	14143.3	69548.1	3394.52	1650.31	16507.1	11294.9	16456.1	2862.41	10300.7	12076.2	2012.46				10807.7	2374.08	2419.68	4025.59	30728.4	16024.2	17773.9	33993.4	26766.3
21268.9	6385.34	3259.97	13621.8	2625.58	5455.48	2837.19	5040.93	4101.39	3100.74	1993.28	16966.3	12753.3	24239.1	6130.84	7895.62	21296.6	11478.9	6281.5	23091.9	10935.9	11162.1	3946.77	8056.62	12951.2	21824.8	24236.6	14231.6	70562.2	3428.72	1676.09	16832.8	11533.7	16680.6	2932.67	10515	12259.2	2039.58				11032.1	2363.65	2436.07	4078.93	31352	16219.4	18185.9	34403.8	27293.5
21755.8	6480.67	3275.18	13921.7	2683.07	5563.63	2894.7	5162.87	4195.69	3139.43	2026.48	17429.1	12962.1	24441.9	6229.79	7933.45	21783.7	11695.4	6348.35	23094.2	11219.3	11252.7	4045.87	8221.96	13209.8	21813.8	24630.7	14318.1	71563.5	3460.27	1696.58	17167.1	11775.4	16903.4	3003.19	10735.5	12445.4	2066.85				11258.2	2350.75	2455.09	4144.62	31991.8	16429.7	18610	34834.4	27804.6
22249.5	6576.42	3285.77	14228.3	2738.99	5673.27	2951.45	5284.79	4299.22	3176.88	2059.92	17889.3	13161.8	24696.2	6326.94	7971.45	22289.6	11903.1	6410.11	23088	11492	11354.8	4151.73	8382.66	13476.3	21835	25024.3	14353.7	72550.7	3493.52	1712.07	17506.1	12024.7	17131.7	3074.32	10960	12632.9	2094.36				11479.3	2333.64	2477.98	4188.93	32660.9	16651.7	19057.9	35251	28301.9
22738.5	6671.85	3292.75	14547.1	2794.59	5782.36	3006.9	5406.99	4399.46	3215.81	2093.18	18345.1	13363.3	24956.2	6406.21	8018.85	22802.6	12111.1	6432.4	23063.7	11738.1	11452.3	4262.84	8552.8	13742.2	21889.5	25412.6	14394.3	73532.5	3526.91	1730.48	17849.1	12263.1	17353.2	3146.08	11176.3	12818.6	2122.07				11701.2	2315.56	2506.07	4235.5	33350.5	16895.2	19524.9	35662.7	28795
23225	6765.63	3306.19	14882.1	2853.62	5893.91	3064.2	5532.78	4500.62	3255.95	2126.03	18797.4	13567.5	25248.9	6485.4	8060.45	23328.6	12319.2	6455.86	23002.4	11917.3	11545.7	4374.28	8720.41	14009.8	21984.7	25808.5	14458.8	74514.1	3558.94	1746.8	18189.8	12506	17579.4	3217.3	11380.4	13005.1	2150.17				11917.6	2294.48	2536.05	4287.64	34067.3	17150.4	19978.1	36068.8	29286.8
23724.6	6856.76	3316.89	15236.1	2914.71	6002.96	3122.7	5659.03	4605.1	3294.73	2160.66	19255.6	13770.5	25597.4	6571.71	8099.58	23888.3	12525.5	6509.63	22870.2	12009.9	11636.9	4488.91	8884.71	14279.6	22108.4	26210.3	14506.1	75484	3585.94	1768.28	18524.6	12755.2	17818.8	3289.05	11603.5	13192.7	2178.4				12133.7	2274.63	2569.27	4351.81	34794.8	17417.2	20454.3	36466	29768.5
24241.1	6948.66	3323.94	15609.5	2979.86	6041.02	3181.08	5785.5	4707.83	3335.76	2191.83	19718.2	13974.4	26011.2	6654.28	8137.19	24449.8	12735.4	6567.17	22728.4	12080.5	11737.5	4605.12	9062.67	14545.4	22290.7	26615.1	14547.6	76429.6	3613.48	1787.11	18848.1	13009.3	18063	3360.42	11814.6	13381.5	2206.97				12344.7	2258.8	2604.22	4416.89	35541.2	17695.6	20932.6	36796.5	30262.7
24766.4	7041.45	3328.35	15997.8	3038.4	6078.73	3239.63	5916.09	4805.56	3375.19	2222.7	20190	14172.4	26491.7	6735.59	8180.34	24943.5	12958.9	6607.67	22602.1	12164.8	11842.2	4721.57	9244.6	14807.8	22529	27021.5	14574.8	77350.1	3644.15	1800.84	19170.8	13269.1	18314.7	3434.35	12020	13572.3	2235.55				12547.2	2239.49	2639.81	4494.27	36299	17991.5	21434	37168.9	30795.9
25288	7132.96	3332.51	16390.1	3100.02	6117.96	3299.15	6043.01	4901.83	3415.71	2256.04	20674.7	14360.7	27023.9	6809.65	8232.56	25451	13185.5	6645.21	22466.8	12257.1	11952.3	4838.16	9436.69	15059.4	22801.4	27419	14603.8	78220.1	3677.71	1820.21	19484.9	13532.5	18561.8	3508.94	12232.9	13764.8	2263.38				12753.6	2217.96	2676.87	4596.6	37088.2	18303.5	21948.8	37544.7	31366.6
25789.4	7227.24	3336.04	16794.8	3163.05	6157.61	3356.64	6168.71	5000.08	3460.48	2290.85	21154.1	14543.5	27582.9	6868.4	8283.4	25953.1	13409	6679.73	22362.2	12357.9	12074.6	4943.95	9628.37	15307.7	23127.3	27811.2	14622.7	79064	3712.5	1855.38	19799.3	13800.8	18811.7	3585.84	12432.6	13958.8	2291.01				12967.8	2193.79	2716.4	4710.35	37875.4	18633	22457.3	37938.8	31972.1
26270.3	7328.52	3343.12	17235.5	3224.66	6198.43	3412.21	6295.31	5099.01	3503.8	2325.99	21641.4	14720.1	28185.3	6918.12	8325.43	26452.2	13626.5	6714.78	22237.2	12470.9	12206	5053.09	9820.12	15552.5	23480.1	28200.8	14631.9	79866.1	3744.96	1894.91	20116.2	14078.7	19060.2	3664.96	12569.6	14151.9	2318.04				13177.9	2168.63	2755.72	4816.9	38664	18990.9	22989	38380.3	32617.2
26785.5	7435.45	3349.06	17679.3	3288.7	6231.51	3468.79	6424.79	5203.5	3550.25	2361.68	22127.7	14893	28800	6964.2	8362.22	26954.3	13861.7	6751.96	22109.4	12586.6	12342.2	5168.46	10014.4	15803.4	23853.4	28587.6	14637.7	80651.7	3770.49	1924.77	20430.4	14364.2	19311.8	3745.68	12789.7	14349.6	2345.08				13373.9	2143.21	2794.4	4913.59	39439.8	19365.9	23531.6	38863.7	33316.9
27317.7	7545.57	3350.09	18128.6	3351.77	6262.4	3523.7	6558.69	5304.29	3592.26	2398.99	22610.1	15062.5	29416.7	7017.17	8400.18	27468.7	14101.3	6790.43	21972.3	12721.9	12495	5289.43	10206.7	16056.9	24236.5	28977.9	14632.8	81427.3	3800.29	1952.31	20745.8	14655.4	19564.6	3826.8	13013	14549.3	2372.2				13573.1	2117.15	2834.59	5004.04	40162.9	19761.5	24081.4	39395.4	34031.5
27856.7	7656.08	3351.1	18591	3409.09	6292.44	3577.29	6693.38	5410.39	3633.65	2438.7	23095.1	15233.1	30013.3	7067.11	8436.09	27995.3	14343.2	6828.65	21830.5	12887	12655.4	5411.04	10397.6	16311.9	24612.4	29360.7	14623.4	82202.3	3841.2	1978.22	21060.3	14944.7	19823.2	3904.34	13239.1	14750.1	2399.39				13772.7	2096.71	2879.11	5086.5	40911.8	20179.1	24617.5	39966.1	34778
28417.6	7771.18	3343.97	19062.8	3473.8	6323.24	3633	6826.92	5517.37	3670.9	2480.57	23585.4	15397.5	30611.8	7111.76	8476.3	28539.5	14594.3	6865.33	21685.7	13072.7	12822.6	5537.49	10589.5	16566.4	24961.3	29740.7	14600.9	82977.6	3885.05	2005.17	21367.9	15241.2	20088.2	3982.01	13470.4	14952.7	2426.81				13956.6	2083.81	2925.01	5178.39	41613.3	20616.1	25169.5	40565.8	35472
28993.5	7891.59	3333.63	19543.6	3536.13	6353.54	3687.16	6962.49	5625.33	3706.15	2518.25	24075.8	15554.1	31212.6	7147.13	8514.61	29059.9	14838.9	6886.01	21536.6	13282.5	12990.2	5661.38	10773.3	16822	25284.7	30127	14570.8	83749.2	3932.16	2038.84	21677.8	15546.4	20366.4	4060.82	13701.8	15154.5	2454.33				14144.4	2070.3	2971	5266.6	42318.3	21072.1	25743.8	41203.3	36196.5
29550.3	8013.96	3332.26	20027.8	3599.4	6383.55	3743.77	7100.35	5734.18	3738.61	2558.94	24565.6	15706.3	31818.2	7177.59	8550.78	29557.1	15106.5	6882.7	21376.3	13516.8	13158.5	5780.43	10963.6	17079.9	25582.7	30525.1	14549.5	84428.6	3978.12	2067.76	21994	15853.9	20652.7	4139.83	13934	15353.6	2479.84				14331.6	2056.25	3016.53	5360.22	43021.3	21544.1	26335.8	41876.6	36907.7
30082.7	8140.52	3343.39	20512.5	3659.77	6411.77	3799.51	7239.13	5846.74	3766.71	2601.47	25051.3	15850.7	32407.4	7204.42	8585.19	30049.2	15396.5	6863.63	21202.4	13740.6	13321	5896.48	11160.4	17345.7	25872.8	30932.5	14515	85106.1	4029.79	2089.96	22312.2	16163.6	20938.1	4219.9	14164.2	15550.6	2505.28				14524.4	2041.42	3059.59	5462.38	43725.1	22031.9	26935.2	42593.1	37632.3
30640.8	8264.61	3353.52	21018.1	3713.48	6440.96	3855.95	7381.65	5961.92	3799.79	2642.75	25537.5	15983.3	33024.2	7230.31	8618.32	30520.8	15705.4	6855.04	21010.8	13950.2	13471	6012.33	11371.5	17610.2	26150.5	31356.8	14462.9	85776.9	4069.18	2104.03	22632.5	16467.8	21212.7	4298.51	14366.2	15746.5	2531.04				14710.2	2027.59	3101.34	5584.71	44433.5	22533.4	27551.7	43322.2	38370.7
31210.6	8391.61	3365.94	21534.2	3772.8	6469.62	3911.45	7524.32	6079.1	3838.43	2681.67	26008.8	16106.1	33689.6	7265.67	8652.26	30993.4	15997.6	6850.47	20811.1	14168.2	13610.4	6131.77	11589.6	17886.2	26425.6	31790	14400.4	86443.8	4109.77	2115.91	22951.3	16772.7	21482.9	4378.22	14567.6	15943.9	2557.13				14946.5	2015.35	3141.16	5727.84	45145.7	23050.3	28155	44010.5	39078.9
31777.7	8519.51	3380.3	22039.4	3837.85	6498.11	3965.52	7665	6200.82	3888.67	2723.2	26444.3	16215.3	34361.9	7303.18	8689.37	31483.7	16291.1	6863.05	20594.5	14363.8	13750.5	6245.9	11805.9	18160.1	26663	32218	14329.9	87087.2	4151.48	2152.08	23264.5	17074.7	21756.3	4459.5	14765.9	16138.6	2582.48				15171.9	2003.63	3179.17	5879.62	46096.7	23587.5	28717.6	44687.3	39795.1
[truncated: 26 more columns]

## Sheet: 2D- DirAuto Plotted Average
Source data for Fig. 2D: Plotted Average Directional Autocorrelation (Dir_Auto) and SEM. Dir_Auto calculated using DiPer software (Gorelik et al 2013) from trajectories show in Fig. 2B
Control(cKO) (Dir_Auto)				cKO (Dir_Auto)
Time	Avg	SEM		Time	Avg	SEM
0	1	0		0	1	0
5	0.4616	0.00891		5	0.50983	0.00847
10	0.33151	0.00954		10	0.43261	0.00881
15	0.2539	0.00987		15	0.36667	0.00902
20	0.22934	0.01005		20	0.32145	0.00924
25	0.25269	0.00998		25	0.30865	0.00931
30	0.20099	0.01008		30	0.26859	0.00943
35	0.19804	0.01014		35	0.23691	0.00954
40	0.19138	0.01017		40	0.21832	0.00965
45	0.18819	0.01014		45	0.19833	0.00971
50	0.19846	0.01019		50	0.1974	0.00976

## Sheet: 2E - Avg Speeds
Average speed of cells plotted in Fig. 2E. Speeds calculated using DiPer software (Gorelik et al 2013) from trajectories shown in Fig. 2B
Average Speed (μm/min)
Control(cKO)	cKO
0.82799	0.57182
0.37253	0.4366
0.51596	0.53526
0.75361	1.26261
0.59667	1.37815
0.39331	0.69887
0.40093	1.16589
0.50449	1.10835
0.45842	1.3997
0.48595	1.54224
0.35232	0.66544
0.61662	0.43786
0.56864	0.64768
1.64557	0.91417
0.71233	0.31799
0.56197	1.62513
1.05052	1.65892
0.78841	2.43584
0.96925	0.26999
1.26883	0.47269
1.52044	1.41547
0.90137	1.10512
0.51765	1.07336
0.73368	0.43458
0.46602	0.61439
1.33383	1.62873
0.66203	0.33152
0.79596	1.12101
1.08265	1.16672
0.45119	0.47998
0.85685	1.15309
0.58755	0.42778
0.54971	2.70532
0.72639
0.32012
0.64565
