# Supplementary material for: Spatiotemporal dynamics of PIEZO1 localization controls keratinocyte migration during wound healing
Source: eLife. 2021 Sep 27;10:e65415. doi: 10.7554/eLife.65415 (PMC8577841; doi:10.7554/eLife.65415)
Supplement: Figure 3—source data 1. — (Sheet 1) Relative frequency data used to create bar plots showing the distribution of cell shape modes of ControlcKO and Piezo1-cKO cells in Figure 3D. (Sheet 2) Cumulative frequency used to create stacked bar graphs seen in Figure 3E indicating the proportion of weakly polarized, polarized, or hyper-polarized shape modes in ControlcKO and Piezo1-cKO cells. (Sheet 3) Shape mode output from VAMPIRE (visually aided morpho-phenotyping image recognition) used to create shape mode averages in Sheets 1 and 2. (Sheets 4, 5, 6) Similar to Sheets 1, 2, and 3 respectively but using Piezo1-GoF and ControlGoF cells for graphs in Figure 3F,G. [file elife-65415-fig3-data1.xlsx]

## Sheet: 3D Con v cKO Shape Modes
		Relative Frequency (%)	Relative Frequency (%)
Shape Mode	Polarization	Con(cKO)	cKO
1	Weakly Polarized	3.75587	5.04141
2	Weakly Polarized	5.16432	5.07742
3	Weakly Polarized	2.39437	6.80591
4	Weakly Polarized	4.22535	7.02197
5	Weakly Polarized	3.05164	6.58985
6	Weakly Polarized	9.71831	15.0522
7	Weakly Polarized	2.30047	6.48181
8	Polarized	6.47887	3.9251
9	Polarized	3.89671	3.88909
10	Polarized	3.89671	7.56212
11	Polarized	4.08451	5.54555
12	Polarized	3.42723	4.53727
13	Polarized	3.56808	2.77278
14	Polarized	4.31925	4.6453
15	Hyper Polarized	7.93427	1.18833
16	Hyper Polarized	8.49765	3.74505
17	Hyper Polarized	4.97653	5.11343
18	Hyper Polarized	6.57277	1.29636
19	Hyper Polarized	8.82629	2.26864
20	Hyper Polarized	2.9108	1.4404

## Sheet: 3E Con v cKO Shape Modes
	Con(cKO) (%)	cKO (%)
Weakly Polarized	30.6103	52.0706
Polarized	29.6714	32.8772
Hyper Polarized	39.7183	15.0522

## Sheet: Control (cKO) 20 Bin 400 Coord
Shape Modes output from VAMPIRE software (Phillip et al 2021) for segmented Control (cKO background) keratinocytes . Column B used for generating frequency graphs in 3D/E.
Filename	Shape mode	Distance from cluster center
Shape 1	19	4.84
Shape 2	8	5.02
Shape 3	8	5.13
Shape 4	8	4.43
Shape 5	14	4.38
Shape 6	11	4.98
Shape 7	13	4.79
Shape 8	13	4.25
Shape 9	13	4.86
Shape 10	17	4.99
Shape 11	17	4.85
Shape 12	18	4.31
Shape 13	18	4.25
Shape 14	18	4.28
Shape 15	18	4.68
Shape 16	18	4.56
Shape 17	18	4.9
Shape 18	18	5.2
Shape 19	18	5.32
Shape 20	18	4.82
Shape 21	18	4.51
Shape 22	18	4.54
Shape 23	18	4.29
Shape 24	18	4.43
Shape 25	18	4.33
Shape 26	18	4.1
Shape 27	18	4.23
Shape 28	4	4.36
Shape 29	16	4.33
Shape 30	16	4.32
Shape 31	18	4.44
Shape 32	18	4.4
Shape 33	18	4.31
Shape 34	18	4.34
Shape 35	18	4.34
Shape 36	18	4.63
Shape 37	18	4.59
Shape 38	18	4.59
Shape 39	18	5.16
Shape 40	18	5.49
Shape 41	18	5.89
Shape 42	16	2.96
Shape 43	16	6.16
Shape 44	18	6.87
Shape 45	18	7.25
Shape 46	18	7.45
Shape 47	18	7.71
Shape 48	18	8.03
Shape 49	8	7.77
Shape 50	18	8.22
Shape 51	8	8.29
Shape 52	8	8.44
Shape 53	8	8.36
Shape 54	8	8.05
Shape 55	8	7.98
Shape 56	8	8
Shape 57	8	8.19
Shape 58	17	9.14
Shape 59	16	9.59
Shape 60	16	10.17
Shape 61	8	9.22
Shape 62	8	9.18
Shape 63	15	10.83
Shape 64	15	11.65
Shape 65	11	10.66
Shape 66	11	8.94
Shape 67	11	8.5
Shape 68	19	5.18
Shape 69	2	6.82
Shape 70	2	5.83
Shape 71	8	5.08
Shape 72	8	4.46
Shape 73	19	3.99
Shape 74	19	4
Shape 75	19	4.39
Shape 76	19	4.2
Shape 77	19	4.32
Shape 78	19	4.24
Shape 79	19	4.21
Shape 80	19	4.32
Shape 81	19	4.37
Shape 82	19	4.17
Shape 83	19	4.39
Shape 84	19	4.28
Shape 85	19	4.63
Shape 86	19	4.7
Shape 87	8	4.47
Shape 88	19	4.72
Shape 89	8	4.5
Shape 90	2	4.61
Shape 91	2	4.62
Shape 92	8	4.13
Shape 93	16	3.89
Shape 94	15	3.71
Shape 95	15	3.95
Shape 96	15	4.02
Shape 97	15	3.95
Shape 98	15	3.8
Shape 99	15	3.67
Shape 100	15	3.65
Shape 101	15	3.77
Shape 102	13	3.66
Shape 103	13	3.73
Shape 104	5	4.57
Shape 105	13	3.79
Shape 106	13	3.77
Shape 107	13	3.63
Shape 108	13	3.75
Shape 109	13	3.66
Shape 110	13	3.86
Shape 111	16	3.96
Shape 112	16	5.69
Shape 113	17	6.28
Shape 114	17	7.21
Shape 115	13	7.75
Shape 116	13	7.64
Shape 117	13	7.33
Shape 118	2	6.96
Shape 119	13	7.39
Shape 120	13	7.81
Shape 121	2	7.66
Shape 122	13	7.83
Shape 123	13	8.25
Shape 124	2	8.32
Shape 125	13	8.4
Shape 126	13	8.41
Shape 127	13	8.13
Shape 128	3	8.11
Shape 129	3	7.86
Shape 130	11	7.79
Shape 131	11	7.54
Shape 132	11	7.49
Shape 133	11	6.07
Shape 134	18	7.78
Shape 135	18	7.73
Shape 136	4	6.44
Shape 137	2	6.62
Shape 138	11	5.97
Shape 139	19	4.93
Shape 140	19	5.82
Shape 141	19	5.67
Shape 142	2	4.97
Shape 143	18	4.31
Shape 144	18	3.08
Shape 145	18	3.06
Shape 146	18	2.82
Shape 147	18	2.79
Shape 148	18	3.4
Shape 149	18	3.02
Shape 150	18	3.11
Shape 151	18	3.29
Shape 152	9	3.45
Shape 153	18	3.34
Shape 154	18	3.54
Shape 155	18	3.53
Shape 156	9	3.85
Shape 157	18	3.84
Shape 158	18	3.96
Shape 159	9	4.29
Shape 160	18	4.54
Shape 161	18	4.14
Shape 162	9	3.31
Shape 163	18	3.19
Shape 164	18	3.09
Shape 165	8	3.22
Shape 166	15	3.24
Shape 167	16	3.2
Shape 168	18	3.51
Shape 169	16	3.09
Shape 170	15	3.13
Shape 171	15	3
Shape 172	15	3.02
Shape 173	15	2.94
Shape 174	15	3.35
Shape 175	15	3.46
Shape 176	15	3.49
Shape 177	15	3.17
Shape 178	15	3.08
Shape 179	15	2.92
Shape 180	15	3.05
Shape 181	15	3.11
Shape 182	15	2.94
Shape 183	15	2.87
Shape 184	15	2.96
Shape 185	15	3.16
Shape 186	15	3.14
Shape 187	15	3.45
Shape 188	15	3.75
Shape 189	15	4.09
Shape 190	15	4.3
Shape 191	15	4.15
Shape 192	15	3.96
Shape 193	9	4.49
Shape 194	15	3.92
Shape 195	15	3.83
Shape 196	4	3.66
Shape 197	15	3.61
Shape 198	15	3.58
Shape 199	6	3.2
Shape 200	15	3.38
Shape 201	15	3.23
Shape 202	15	3.49
Shape 203	1	6.69
Shape 204	15	3.65
Shape 205	15	3.93
Shape 206	1	5.71
Shape 207	15	3.99
Shape 208	15	4.01
Shape 209	15	3.83
Shape 210	15	3.53
Shape 211	3	3.94
Shape 212	3	4.13
Shape 213	3	4
Shape 214	3	3.76
Shape 215	19	2.99
Shape 216	16	15.06
Shape 217	19	3.19
Shape 218	19	3.14
Shape 219	19	3.26
Shape 220	19	3.11
Shape 221	19	3.76
Shape 222	19	3.26
Shape 223	19	3.49
Shape 224	19	3.03
Shape 225	19	3.39
Shape 226	19	2.91
Shape 227	19	3.44
Shape 228	19	2.42
Shape 229	19	2.91
Shape 230	19	3.66
Shape 231	19	3.04
Shape 232	19	2.67
Shape 233	10	2.91
Shape 234	19	2.66
Shape 235	19	2.57
Shape 236	11	2.63
Shape 237	11	2.85
Shape 238	14	3.1
Shape 239	14	3.49
Shape 240	12	3.08
Shape 241	13	1.88
Shape 242	6	2.27
Shape 243	19	1.81
Shape 244	2	2.01
Shape 245	2	2.97
Shape 246	11	3.32
Shape 247	2	2.23
Shape 248	9	2.62
Shape 249	13	2.24
Shape 250	3	2.23
Shape 251	6	2.14
Shape 252	6	1.81
Shape 253	6	2.09
Shape 254	6	2.03
Shape 255	6	1.53
Shape 256	6	1.93
Shape 257	6	1.98
Shape 258	6	2.27
Shape 259	6	1.51
Shape 260	6	1.86
Shape 261	6	1.59
Shape 262	6	1.35
Shape 263	6	1.73
Shape 264	6	1.65
Shape 265	6	1.69
Shape 266	6	2.1
Shape 267	6	2.1
Shape 268	4	2.23
Shape 269	3	2.07
Shape 270	7	1.83
Shape 271	6	1.76
Shape 272	6	1.87
Shape 273	6	1.57
Shape 274	6	1.56
Shape 275	6	2.03
Shape 276	6	2.22
Shape 277	6	1.33
Shape 278	6	1.75
Shape 279	6	1.58
Shape 280	6	1.62
Shape 281	6	1.91
Shape 282	6	1.68
Shape 283	6	1.83
Shape 284	6	2.36
Shape 285	6	1.79
Shape 286	6	1.52
Shape 287	6	1.56
Shape 288	6	2.16
Shape 289	6	2.03
Shape 290	6	1.71
Shape 291	6	1.93
Shape 292	6	1.49
Shape 293	6	1.41
Shape 294	6	1.56
Shape 295	6	1.47
Shape 296	6	1.71
Shape 297	6	1.17
Shape 298	6	1.43
Shape 299	6	2.14
Shape 300	6	1.93
Shape 301	6	1.42
Shape 302	6	1.55
Shape 303	6	1.3
Shape 304	6	2.13
Shape 305	6	1.98
Shape 306	6	1.31
Shape 307	6	1.96
Shape 308	6	1.64
Shape 309	6	1.25
Shape 310	6	2.12
Shape 311	7	2.35
Shape 312	14	1.5
Shape 313	6	1.53
Shape 314	6	1.52
Shape 315	6	1.95
Shape 316	6	1.41
Shape 317	6	1.77
Shape 318	6	1.89
Shape 319	3	1.75
Shape 320	6	1.71
Shape 321	3	2.22
Shape 322	6	1.63
Shape 323	6	1.89
Shape 324	6	1.88
Shape 325	6	1.56
Shape 326	6	2.29
Shape 327	6	2.01
Shape 328	6	1.15
Shape 329	6	1.58
Shape 330	6	1.48
Shape 331	6	1.48
Shape 332	6	1.88
Shape 333	6	1.58
Shape 334	6	1.72
Shape 335	5	1.59
Shape 336	6	1.58
Shape 337	6	1.41
Shape 338	6	1.49
Shape 339	4	1.65
Shape 340	6	2.8
Shape 341	6	1.89
Shape 342	6	1.98
Shape 343	6	1.23
Shape 344	6	2.35
Shape 345	6	1.51
Shape 346	6	2
Shape 347	6	1.68
Shape 348	6	1.95
Shape 349	4	2.52
Shape 350	6	1.6
Shape 351	6	1.6
Shape 352	6	2.02
Shape 353	6	2.14
Shape 354	6	1.33
Shape 355	6	1.67
Shape 356	6	1.68
Shape 357	6	1.78
Shape 358	6	1.85
Shape 359	6	1.6
Shape 360	6	1.52
Shape 361	6	1.68
Shape 362	6	1.63
Shape 363	6	1.44
Shape 364	6	1.49
Shape 365	6	1.84
Shape 366	6	1.79
Shape 367	6	1.88
Shape 368	6	1.99
Shape 369	6	1.28
Shape 370	6	1.86
Shape 371	6	1.68
Shape 372	6	1.76
Shape 373	6	1.51
Shape 374	6	2.04
Shape 375	6	2.01
Shape 376	6	1.43
Shape 377	6	1.21
Shape 378	6	1.94
Shape 379	6	2.04
Shape 380	6	1.25
Shape 381	6	1.23
Shape 382	6	2.23
Shape 383	7	2.34
Shape 384	6	1.71
Shape 385	6	1.87
Shape 386	6	1.81
Shape 387	6	1.73
Shape 388	6	1.38
Shape 389	6	1.54
Shape 390	6	1.25
Shape 391	6	2.01
Shape 392	6	1.76
Shape 393	6	1.65
Shape 394	6	2.05
Shape 395	6	1.62
Shape 396	6	1.58
Shape 397	6	1.59
Shape 398	6	1.5
Shape 399	6	1.76
Shape 400	6	1.27
Shape 401	6	1.81
Shape 402	6	1.62
Shape 403	6	1.24
Shape 404	6	1.27
Shape 405	6	1.63
Shape 406	6	1.94
Shape 407	6	1.53
Shape 408	6	1.63
Shape 409	6	1.32
Shape 410	6	1.61
Shape 411	6	2.14
Shape 412	6	2.12
Shape 413	6	2.29
Shape 414	9	2.71
Shape 415	9	2.39
Shape 416	18	2.73
Shape 417	1	5.71
Shape 418	9	2.93
Shape 419	9	2.69
Shape 420	3	3.13
Shape 421	10	2.57
Shape 422	14	2.18
Shape 423	8	1.55
Shape 424	8	1.79
Shape 425	8	1.94
Shape 426	8	2.06
Shape 427	8	2.58
Shape 428	8	2.2
Shape 429	8	2.21
Shape 430	8	2.29
Shape 431	8	2.25
Shape 432	8	2.65
Shape 433	8	2.63
Shape 434	1	7.66
Shape 435	8	2.62
Shape 436	8	2.62
Shape 437	8	2.56
Shape 438	8	2.48
Shape 439	8	2.71
Shape 440	8	2.67
Shape 441	1	4.66
Shape 442	8	2.68
Shape 443	8	3.24
Shape 444	4	3.83
Shape 445	8	3.09
Shape 446	8	3.02
Shape 447	8	3.24
Shape 448	18	12.03
Shape 449	19	3.5
Shape 450	8	3.16
Shape 451	8	3
Shape 452	16	3.9
Shape 453	8	3.11
Shape 454	8	3.73
Shape 455	8	3.16
Shape 456	8	3.23
Shape 457	8	3.65
Shape 458	8	4.02
Shape 459	2	4.65
Shape 460	2	4.98
Shape 461	11	4.58
Shape 462	14	5
Shape 463	12	5.76
Shape 464	11	5.38
Shape 465	14	5.61
Shape 466	14	5.38
Shape 467	12	4.84
Shape 468	14	4.81
Shape 469	14	4.7
Shape 470	14	4.36
Shape 471	14	4.33
Shape 472	14	4.48
Shape 473	14	4.52
Shape 474	14	4.71
Shape 475	14	4.88
Shape 476	14	5.1
Shape 477	14	5.31
Shape 478	14	5.53
Shape 479	14	5.69
Shape 480	4	5.83
Shape 481	14	5.72
Shape 482	14	5.8
Shape 483	1	4.04
Shape 484	14	6.66
Shape 485	11	7.28
Shape 486	14	6.23
Shape 487	12	6.88
Shape 488	16	4.82
Shape 489	14	7.36
Shape 490	1	4.51
Shape 491	14	6.48
Shape 492	14	6.19
Shape 493	14	5.28
Shape 494	9	4.13
Shape 495	6	1.58
Shape 496	9	4.57
Shape 497	11	4.66
Shape 498	11	4.1
Shape 499	14	3.91
Shape 500	11	4.35
Shape 501	11	4.36
Shape 502	11	4.36
Shape 503	11	4.37
Shape 504	11	4.21
Shape 505	11	4.13
Shape 506	11	3.77
Shape 507	11	3.99
Shape 508	11	4.03
Shape 509	11	4.03
Shape 510	11	3.91
Shape 511	4	3.44
Shape 512	19	3.84
Shape 513	9	3.46
Shape 514	19	3.52
Shape 515	19	3.86
Shape 516	19	3.7
Shape 517	19	3.68
Shape 518	19	3.89
Shape 519	19	4.32
Shape 520	19	4.4
Shape 521	19	4.27
Shape 522	19	4.05
Shape 523	19	4.01
Shape 524	19	3.66
Shape 525	19	3.7
Shape 526	19	4.11
Shape 527	19	4.41
Shape 528	19	4.17
Shape 529	19	4.26
Shape 530	19	4.41
Shape 531	9	3.76
Shape 532	16	4.69
Shape 533	19	3.73
Shape 534	19	3.29
Shape 535	8	3.16
Shape 536	19	3.31
Shape 537	19	2.93
Shape 538	4	3.67
Shape 539	19	3.3
Shape 540	15	3.62
Shape 541	8	3.72
Shape 542	19	3.51
Shape 543	19	3.83
Shape 544	19	4
Shape 545	19	4.1
Shape 546	19	4.24
Shape 547	8	4.17
Shape 548	8	4.48
Shape 549	19	4.43
Shape 550	8	4.67
Shape 551	8	4.83
Shape 552	19	4.97
Shape 553	8	4.55
Shape 554	19	4.92
Shape 555	1	4.21
Shape 556	8	4.66
Shape 557	1	3.01
Shape 558	10	6.51
Shape 559	8	4.41
Shape 560	8	4.45
Shape 561	8	4.57
Shape 562	19	5.68
Shape 563	5	1.83
Shape 564	15	4.45
Shape 565	18	2.13
Shape 566	15	5.09
Shape 567	5	2.69
Shape 568	15	5.41
Shape 569	5	3.07
Shape 570	15	5.25
Shape 571	10	3.13
Shape 572	16	5.44
Shape 573	8	2.03
Shape 574	4	4.25
Shape 575	17	5.86
Shape 576	8	2.08
Shape 577	1	4.7
Shape 578	17	7.22
Shape 579	8	1.97
Shape 580	17	7.29
Shape 581	19	3.08
Shape 582	17	7.9
Shape 583	8	2.72
Shape 584	17	6.35
Shape 585	8	2.82
Shape 586	17	6.13
Shape 587	8	2.54
Shape 588	17	5.91
Shape 589	6	4.32
Shape 590	8	3.28
Shape 591	17	6.3
Shape 592	1	3.14
Shape 593	8	3.2
Shape 594	16	6.86
Shape 595	8	2.9
Shape 596	16	6.76
Shape 597	8	3.07
Shape 598	17	6.95
Shape 599	13	3.18
Shape 600	17	6.57
Shape 601	13	2.81
Shape 602	16	6.36
Shape 603	4	3.44
Shape 604	13	3.12
Shape 605	16	6.38
Shape 606	13	3.03
Shape 607	16	6.31
Shape 608	13	3.15
Shape 609	17	5.74
Shape 610	13	3.07
Shape 611	8	5.24
Shape 612	13	3.3
Shape 613	13	4.91
Shape 614	13	3.28
Shape 615	17	5
Shape 616	13	3.78
Shape 617	13	5.02
Shape 618	17	3.82
Shape 619	13	5.01
Shape 620	17	3.71
Shape 621	13	5
Shape 622	17	3.6
Shape 623	13	5.04
Shape 624	17	3.98
Shape 625	8	2.14
Shape 626	15	3.18
Shape 627	16	3.53
Shape 628	11	5.76
Shape 629	17	3.99
Shape 630	19	3.48
Shape 631	18	5.32
Shape 632	12	5.08
Shape 633	17	3.87
Shape 634	11	5.32
Shape 635	17	4.16
Shape 636	14	3.85
Shape 637	17	4.48
Shape 638	20	3.55
Shape 639	16	3.64
Shape 640	9	3.54
Shape 641	17	3.98
Shape 642	9	4.22
Shape 643	17	4.43
Shape 644	15	4.56
Shape 645	15	3.91
Shape 646	9	5.25
Shape 647	15	2.25
Shape 648	20	2.97
Shape 649	17	4.37
Shape 650	15	2.63
Shape 651	16	4.03
Shape 652	1	14.36
Shape 653	15	3.11
Shape 654	17	4.38
Shape 655	15	3.28
Shape 656	6	2.23
Shape 657	18	5.3
Shape 658	15	3.36
Shape 659	16	4.98
Shape 660	15	3.65
Shape 661	14	6.6
Shape 662	18	5.65
Shape 663	19	3.49
Shape 664	18	6.04
Shape 665	15	4.15
Shape 666	16	5.9
Shape 667	15	4.58
Shape 668	18	5.77
Shape 669	15	4.39
Shape 670	1	4.99
Shape 671	16	4.61
Shape 672	15	3.82
Shape 673	15	3.65
Shape 674	20	4.6
Shape 675	20	4.9
Shape 676	20	3.54
Shape 677	6	5.25
Shape 678	15	3.12
Shape 679	20	4.66
Shape 680	13	4.59
Shape 681	20	4.18
Shape 682	15	4.3
Shape 683	20	4.55
Shape 684	6	4.32
Shape 685	20	4.55
Shape 686	20	4.56
Shape 687	20	4.81
Shape 688	12	4.4
Shape 689	20	8.04
Shape 690	12	4.5
Shape 691	19	4.39
Shape 692	12	4.55
Shape 693	15	3.35
Shape 694	12	5.24
Shape 695	12	4.82
Shape 696	15	4.37
Shape 697	15	3.87
Shape 698	15	4.29
Shape 699	15	3.1
Shape 700	20	4
Shape 701	19	3.39
Shape 702	15	3.11
Shape 703	9	10.37
Shape 704	15	4.63
Shape 705	15	2.97
Shape 706	15	4.71
Shape 707	15	2.67
Shape 708	15	4.81
Shape 709	18	7.1
Shape 710	8	3.13
Shape 711	13	3.55
Shape 712	2	3.44
Shape 713	16	3.57
Shape 714	2	3.71
Shape 715	13	3.15
Shape 716	2	3.32
Shape 717	7	3.23
Shape 718	2	2.84
Shape 719	9	3.64
Shape 720	2	2.97
Shape 721	7	3.45
Shape 722	2	3.41
Shape 723	7	3.25
Shape 724	2	2.89
Shape 725	7	4.02
Shape 726	2	3.27
Shape 727	7	4.09
Shape 728	2	3.24
Shape 729	2	2.61
Shape 730	2	3.3
Shape 731	2	4.15
Shape 732	2	3.42
Shape 733	8	3.32
Shape 734	2	3.34
Shape 735	14	2.81
Shape 736	2	3.34
Shape 737	8	2.83
Shape 738	10	4.04
Shape 739	2	3.25
Shape 740	19	2.66
Shape 741	2	3.01
Shape 742	19	2.59
Shape 743	2	3.03
Shape 744	19	2.56
Shape 745	2	2.8
Shape 746	19	2.82
Shape 747	2	2.93
Shape 748	19	2.57
Shape 749	2	2.91
Shape 750	8	2.55
Shape 751	2	3.18
Shape 752	8	2.82
Shape 753	2	3.43
Shape 754	8	3.28
Shape 755	2	3.13
Shape 756	8	3.92
Shape 757	2	3.4
Shape 758	10	3.29
Shape 759	2	3.76
Shape 760	9	3.22
Shape 761	8	7.33
Shape 762	2	3.83
Shape 763	9	3.68
Shape 764	2	3.62
Shape 765	9	3.67
Shape 766	2	3.72
Shape 767	9	3.65
Shape 768	2	3.37
Shape 769	20	2.8
Shape 770	2	3.21
Shape 771	12	2.93
Shape 772	2	3.39
Shape 773	12	2.67
Shape 774	2	3.41
Shape 775	12	2.48
Shape 776	2	3.55
Shape 777	13	3.9
Shape 778	2	3.74
Shape 779	19	3.32
Shape 780	2	3.43
Shape 781	19	2.99
Shape 782	2	3.66
Shape 783	19	2.93
Shape 784	11	3.6
Shape 785	19	2.7
Shape 786	11	3.52
Shape 787	19	2.61
Shape 788	11	3.94
Shape 789	15	2.89
Shape 790	11	3.68
Shape 791	15	3.11
Shape 792	11	4.3
Shape 793	15	3.1
Shape 794	2	4.44
Shape 795	12	2.19
Shape 796	11	3.66
Shape 797	8	2.31
Shape 798	11	3.68
Shape 799	19	2.73
Shape 800	11	3.59
Shape 801	20	3.63
Shape 802	2	3.94
Shape 803	12	2.85
Shape 804	11	3.47
Shape 805	13	3.01
Shape 806	11	3.79
Shape 807	19	3.08
Shape 808	11	4.04
Shape 809	19	2.43
Shape 810	11	3.75
Shape 811	8	8.38
Shape 812	8	8.07
Shape 813	12	2.8
Shape 814	2	5.16
Shape 815	15	3.43
Shape 816	2	4.24
Shape 817	11	3.56
Shape 818	10	2.91
Shape 819	11	3.78
Shape 820	12	1.83
Shape 821	2	3.48
Shape 822	14	2.44
Shape 823	1	4.8
Shape 824	2	3.66
Shape 825	8	2.39
Shape 826	17	11.9
Shape 827	8	4.47
Shape 828	11	3.77
Shape 829	12	2.62
Shape 830	2	3.72
Shape 831	12	2.38
Shape 832	2	3.33
Shape 833	12	3.08
Shape 834	8	7.89
Shape 835	2	2.8
Shape 836	19	3.13
Shape 837	18	6.42
Shape 838	2	2.37
Shape 839	19	3.09
Shape 840	18	6.55
Shape 841	15	8.56
Shape 842	8	2.39
Shape 843	15	7.66
Shape 844	19	2.84
Shape 845	8	2.87
Shape 846	8	7.77
Shape 847	2	2.51
Shape 848	19	3.17
Shape 849	8	5.4
Shape 850	10	5.12
Shape 851	18	6.05
Shape 852	2	2.73
Shape 853	16	2.64
Shape 854	8	5.63
Shape 855	8	8.37
Shape 856	14	5.19
Shape 857	8	2.6
Shape 858	15	2.87
Shape 859	18	4.21
Shape 860	14	5.82
Shape 861	8	2.3
Shape 862	15	3
Shape 863	10	6.47
Shape 864	12	6.27
Shape 865	8	2.47
Shape 866	20	4.33
Shape 867	12	6.27
Shape 868	14	6.07
Shape 869	8	2.47
Shape 870	8	4.03
Shape 871	15	8.77
Shape 872	19	4.39
Shape 873	8	2.34
Shape 874	19	4.45
Shape 875	11	2.35
Shape 876	8	3.58
Shape 877	5	4.42
Shape 878	2	3.17
Shape 879	15	8.59
Shape 880	14	3.15
Shape 881	8	2.65
Shape 882	5	7.88
Shape 883	7	2.49
Shape 884	2	2.63
Shape 885	14	3.01
Shape 886	11	2.45
Shape 887	20	5.93
Shape 888	14	23.03
Shape 889	5	3.28
Shape 890	14	2.76
Shape 891	11	2.48
Shape 892	12	5.93
Shape 893	20	4.6
Shape 894	15	3.21
Shape 895	11	2.38
Shape 896	15	4.37
Shape 897	11	2.37
Shape 898	8	5.33
Shape 899	16	3.24
Shape 900	11	2.34
Shape 901	2	3.51
Shape 902	2	4.19
Shape 903	11	2.42
Shape 904	8	6.75
Shape 905	9	6.2
Shape 906	14	2.7
Shape 907	11	2.61
Shape 908	15	5.46
Shape 909	14	2.62
Shape 910	11	2.46
Shape 911	15	4.22
Shape 912	7	3.13
Shape 913	11	2.47
Shape 914	20	6.8
Shape 915	4	3.28
Shape 916	11	2.37
Shape 917	15	4.18
Shape 918	14	3.61
Shape 919	20	3.24
Shape 920	20	8.05
Shape 921	18	2.93
Shape 922	16	2.51
Shape 923	19	3.58
Shape 924	20	4.17
Shape 925	16	2.58
Shape 926	16	2.56
Shape 927	18	4.39
Shape 928	8	7.24
Shape 929	9	2.24
Shape 930	16	2.7
Shape 931	3	2.78
Shape 932	18	2.93
Shape 933	14	2.25
Shape 934	16	2.64
Shape 935	8	7.69
Shape 936	2	2.69
Shape 937	16	2.83
Shape 938	19	7.13
Shape 939	15	2.18
Shape 940	16	2.4
Shape 941	8	5.12
Shape 942	15	2.22
Shape 943	16	2.91
Shape 944	20	4.8
Shape 945	5	2.8
Shape 946	16	2.64
Shape 947	8	2.62
Shape 948	5	2.72
Shape 949	16	2.26
Shape 950	3	3.93
Shape 951	12	3.73
Shape 952	16	2.5
Shape 953	8	3.37
Shape 954	16	2.31
Shape 955	12	6.45
Shape 956	13	2.81
Shape 957	16	2.28
Shape 958	10	7.48
Shape 959	9	3.05
Shape 960	16	2.04
Shape 961	18	4.39
Shape 962	3	2.7
Shape 963	16	2.16
Shape 964	15	3.23
Shape 965	16	2.07
Shape 966	8	5.91
Shape 967	12	3.99
Shape 968	16	1.97
Shape 969	10	8.82
Shape 970	14	2.64
Shape 971	16	1.96
Shape 972	9	4.14
Shape 973	11	3.95
Shape 974	16	2.15
Shape 975	12	2.37
Shape 976	16	2.41
Shape 977	12	2.08
Shape 978	16	2.2
Shape 979	12	3.46
Shape 980	16	2.24
Shape 981	11	2.67
Shape 982	16	2.39
Shape 983	12	3.05
Shape 984	15	2.49
Shape 985	16	2.46
Shape 986	14	2.85
Shape 987	16	2.3
Shape 988	15	3.19
Shape 989	16	2.53
Shape 990	1	3.68
Shape 991	15	3.82
Shape 992	16	2.38
Shape 993	15	3.41
Shape 994	16	2.63
Shape 995	8	6.73
Shape 996	15	3.71
Shape 997	16	2.91
Shape 998	15	3.61
Shape 999	16	2.82
Shape 1000	18	5.81
Shape 1001	15	4.11
Shape 1002	16	2.73
Shape 1003	16	4.41
Shape 1004	5	2.55
Shape 1005	16	2.98
Shape 1006	9	7.1
Shape 1007	1	12.36
Shape 1008	12	2.19
Shape 1009	16	2.9
Shape 1010	19	2.3
Shape 1011	16	3.04
Shape 1012	18	5.77
Shape 1013	19	2.51
Shape 1014	16	3.35
Shape 1015	13	4.52
Shape 1016	19	2.39
Shape 1017	9	3.8
Shape 1018	19	2.75
Shape 1019	16	3.28
Shape 1020	19	2.49
Shape 1021	9	3.79
Shape 1022	19	2.66
Shape 1023	16	3.44
Shape 1024	12	2.3
Shape 1025	16	3.32
Shape 1026	15	2.24
Shape 1027	16	3.52
Shape 1028	8	2.19
Shape 1029	16	3.2
Shape 1030	2	3.25
Shape 1031	16	3.05
Shape 1032	14	2.31
Shape 1033	16	3.17
Shape 1034	19	2.19
Shape 1035	16	3.19
Shape 1036	19	2.58
Shape 1037	16	3.42
Shape 1038	8	1.99
Shape 1039	16	3.08
Shape 1040	8	2.39
Shape 1041	16	3.15
Shape 1042	19	2.13
Shape 1043	16	3.13
Shape 1044	1	12.27
Shape 1045	19	2.23
Shape 1046	16	3.18
Shape 1047	19	2.32
Shape 1048	16	3.27
Shape 1049	16	11.33
Shape 1050	20	4.27
Shape 1051	19	2.31
Shape 1052	16	3.25
Shape 1053	8	2.15
Shape 1054	16	3.35
Shape 1055	8	1.89
Shape 1056	16	3.47
Shape 1057	19	2.04
Shape 1058	16	3.39
Shape 1059	14	7.4
Shape 1060	8	2
Shape 1061	16	3.51
Shape 1062	14	2.05
Shape 1063	16	3.32
Shape 1064	19	1.98
Shape 1065	16	3.15
Shape 1066	18	4.32
Shape 1067	19	1.84
Shape 1068	16	3.34
Shape 1069	18	5.4
Shape 1070	11	1.9
Shape 1071	16	3.48
Shape 1072	19	1.96
Shape 1073	16	3.14
Shape 1074	18	6.28
Shape 1075	8	6.91
Shape 1076	20	7.12
Shape 1077	19	1.9
Shape 1078	16	3.53
Shape 1079	20	8.52
Shape 1080	18	4.39
Shape 1081	5	2.27
Shape 1082	16	3.66
Shape 1083	20	5.88
Shape 1084	5	2.65
Shape 1085	16	3.46
Shape 1086	5	2.46
Shape 1087	13	2.36
Shape 1088	16	3.64
Shape 1089	18	4.32
Shape 1090	13	2.76
Shape 1091	16	3.52
Shape 1092	18	4.32
Shape 1093	3	7.54
Shape 1094	19	5.04
Shape 1095	12	1.94
Shape 1096	16	3.84
Shape 1097	12	2.05
Shape 1098	16	3.84
Shape 1099	18	5.92
Shape 1100	12	2.27
Shape 1101	16	4.18
Shape 1102	18	4.32
Shape 1103	12	1.97
Shape 1104	18	5.37
Shape 1105	20	6.18
Shape 1106	16	3.67
Shape 1107	18	4.32
Shape 1108	20	2.21
Shape 1109	16	3.65
Shape 1110	18	5.92
Shape 1111	12	2.25
Shape 1112	16	3.73
Shape 1113	19	2.4
Shape 1114	16	3.71
Shape 1115	19	3.09
Shape 1116	16	3.97
Shape 1117	19	3.04
Shape 1118	16	4.64
Shape 1119	19	3.46
Shape 1120	16	4.46
Shape 1121	19	3.21
Shape 1122	16	4.04
Shape 1123	19	3.41
Shape 1124	16	4.08
Shape 1125	18	4.38
Shape 1126	19	3.11
Shape 1127	16	4.62
Shape 1128	19	3
Shape 1129	16	4.16
Shape 1130	10	9.8
Shape 1131	8	3.42
Shape 1132	16	4.54
Shape 1133	1	12.76
Shape 1134	8	8.82
Shape 1135	14	3.08
Shape 1136	16	4.45
Shape 1137	6	3.13
Shape 1138	20	5.11
Shape 1139	15	2.59
Shape 1140	16	4.55
Shape 1141	15	2.94
Shape 1142	16	4.43
Shape 1143	15	2.77
Shape 1144	16	4.51
Shape 1145	15	2.95
Shape 1146	16	4.48
Shape 1147	20	2.46
Shape 1148	16	4.47
Shape 1149	8	4.86
Shape 1150	20	2.5
Shape 1151	16	4.35
Shape 1152	20	2.41
Shape 1153	7	4.58
Shape 1154	16	4.55
Shape 1155	20	2.5
Shape 1156	18	6.89
Shape 1157	16	4.4
Shape 1158	15	2.54
Shape 1159	16	4.52
Shape 1160	15	2.94
Shape 1161	16	4.49
Shape 1162	19	2.93
Shape 1163	16	4.46
Shape 1164	20	3.41
Shape 1165	17	5.65
Shape 1166	16	3.99
Shape 1167	20	3.14
Shape 1168	16	4.07
Shape 1169	20	4.08
Shape 1170	16	4.19
Shape 1171	20	3.42
Shape 1172	16	4.27
Shape 1173	20	2.93
Shape 1174	16	4.22
Shape 1175	20	3.03
Shape 1176	18	3.93
Shape 1177	8	3.09
Shape 1178	18	3.88
Shape 1179	8	3
Shape 1180	18	3.4
Shape 1181	8	2.93
Shape 1182	18	3.5
Shape 1183	15	2.94
Shape 1184	18	3.69
Shape 1185	15	2.97
Shape 1186	18	3.76
Shape 1187	15	2.71
Shape 1188	18	3.42
Shape 1189	15	2.87
Shape 1190	10	8.81
Shape 1191	18	3.43
Shape 1192	15	2.51
Shape 1193	18	3.37
Shape 1194	15	3.23
Shape 1195	2	3.74
Shape 1196	6	2.41
Shape 1197	15	2.76
Shape 1198	10	5.23
Shape 1199	18	3.73
Shape 1200	15	3.07
Shape 1201	18	3.66
Shape 1202	15	2.82
Shape 1203	18	3.53
Shape 1204	15	2.72
Shape 1205	5	3.4
Shape 1206	15	3.1
Shape 1207	18	3.14
Shape 1208	15	2.97
Shape 1209	18	2.91
Shape 1210	15	3.1
Shape 1211	18	2.92
Shape 1212	15	3.23
Shape 1213	18	2.98
Shape 1214	15	3.33
Shape 1215	18	3.1
Shape 1216	17	4.81
Shape 1217	17	4.63
Shape 1218	17	4.84
Shape 1219	17	4.91
Shape 1220	17	4.94
Shape 1221	17	4.71
Shape 1222	17	4.89
Shape 1223	3	4.54
Shape 1224	4	4.99
Shape 1225	5	3.13
Shape 1226	4	5.23
Shape 1227	10	6.74
Shape 1228	1	3.6
Shape 1229	16	7.02
Shape 1230	18	4.57
Shape 1231	4	5.25
Shape 1232	10	4.83
Shape 1233	17	6.3
Shape 1234	10	5.08
Shape 1235	18	5.42
Shape 1236	4	2.81
Shape 1237	10	4.99
Shape 1238	1	4.99
Shape 1239	9	4.73
Shape 1240	10	4.83
Shape 1241	9	5.07
Shape 1242	18	5.46
Shape 1243	9	4.58
Shape 1244	9	4.68
Shape 1245	9	4.88
Shape 1246	18	5.21
Shape 1247	9	5.51
Shape 1248	18	5.67
Shape 1249	18	6.22
Shape 1250	11	5.85
Shape 1251	18	5.3
Shape 1252	18	5.64
Shape 1253	11	5.17
Shape 1254	18	5.17
Shape 1255	11	4.81
Shape 1256	11	4.71
Shape 1257	11	4.61
Shape 1258	11	5.15
Shape 1259	7	6.09
Shape 1260	2	3.25
Shape 1261	9	6.14
Shape 1262	7	6.29
Shape 1263	7	5.81
Shape 1264	7	5.87
Shape 1265	7	5.94
Shape 1266	7	5.71
Shape 1267	1	2.31
Shape 1268	9	4.91
Shape 1269	10	5.47
Shape 1270	9	4.76
Shape 1271	12	4.42
Shape 1272	12	4.77
Shape 1273	12	5.11
Shape 1274	12	5.18
Shape 1275	14	4.99
Shape 1276	12	5.15
Shape 1277	14	4.36
Shape 1278	14	5.01
Shape 1279	14	4.31
Shape 1280	1	3.14
Shape 1281	2	4.59
Shape 1282	19	4.04
Shape 1283	1	5.81
Shape 1284	2	4.9
Shape 1285	2	4.93
Shape 1286	17	5.1
Shape 1287	17	4.92
Shape 1288	17	4.85
Shape 1289	17	4.48
Shape 1290	17	3.84
Shape 1291	1	8.85
Shape 1292	17	3.71
Shape 1293	17	12.58
Shape 1294	17	4.11
Shape 1295	20	9.07
Shape 1296	13	4.97
Shape 1297	1	12.44
Shape 1298	16	4.75
Shape 1299	2	2.59
Shape 1300	20	10.25
Shape 1301	16	4.97
Shape 1302	2	2.59
Shape 1303	10	13.35
Shape 1304	17	5.19
Shape 1305	17	5.24
Shape 1306	14	9.43
Shape 1307	20	7.19
Shape 1308	1	10.65
Shape 1309	17	5.1
Shape 1310	20	9.98
Shape 1311	17	4.92
Shape 1312	4	10.34
Shape 1313	4	4.36
Shape 1314	17	4.86
Shape 1315	4	9.25
Shape 1316	17	4.99
Shape 1317	1	10.68
Shape 1318	16	3.72
Shape 1319	7	3.34
Shape 1320	17	4.97
Shape 1321	10	11.15
Shape 1322	17	4.86
Shape 1323	10	11.78
Shape 1324	16	4.2
Shape 1325	2	13.98
Shape 1326	17	4.56
Shape 1327	4	5.9
Shape 1328	16	4.51
Shape 1329	1	10.99
Shape 1330	19	2.62
Shape 1331	17	4.61
Shape 1332	4	8.67
Shape 1333	17	4.82
Shape 1334	4	2.62
Shape 1335	10	10.19
Shape 1336	17	5.83
Shape 1337	1	10.99
Shape 1338	16	5.77
Shape 1339	1	2.92
Shape 1340	1	9.97
Shape 1341	10	9.3
Shape 1342	16	6.25
Shape 1343	4	11.06
Shape 1344	16	5.4
Shape 1345	10	8.29
Shape 1346	17	5.3
Shape 1347	10	11.05
Shape 1348	17	5.27
Shape 1349	20	12.27
Shape 1350	17	5.37
Shape 1351	4	9.58
Shape 1352	16	5.15
Shape 1353	10	4.01
Shape 1354	5	3.47
Shape 1355	13	5.54
Shape 1356	2	3.99
Shape 1357	4	9.27
Shape 1358	5	2.81
Shape 1359	13	5.04
Shape 1360	5	3.25
Shape 1361	1	3.52
Shape 1362	1	6.41
Shape 1363	13	5.23
Shape 1364	16	4.54
Shape 1365	10	11.87
Shape 1366	16	4.49
Shape 1367	10	10.54
Shape 1368	16	4.47
Shape 1369	4	9.98
Shape 1370	16	4.38
Shape 1371	4	8.82
Shape 1372	16	4.63
Shape 1373	10	13.03
Shape 1374	16	4.74
Shape 1375	10	11.47
Shape 1376	16	4.43
Shape 1377	10	11.25
Shape 1378	16	4.55
Shape 1379	1	8.22
Shape 1380	16	4.35
Shape 1381	4	10.61
Shape 1382	18	4.94
Shape 1383	10	12.14
Shape 1384	16	4.89
Shape 1385	10	11.71
Shape 1386	16	5.58
Shape 1387	4	9.59
Shape 1388	16	6.73
Shape 1389	4	9.1
Shape 1390	4	5.2
Shape 1391	16	6.64
Shape 1392	4	10.16
Shape 1393	16	6.6
Shape 1394	4	8.11
Shape 1395	16	7.05
Shape 1396	4	7.76
Shape 1397	16	7.38
Shape 1398	10	11.15
Shape 1399	16	8.23
Shape 1400	10	11.22
Shape 1401	16	9.37
Shape 1402	17	11.34
Shape 1403	4	4.36
Shape 1404	5	1.89
Shape 1405	1	4.99
Shape 1406	16	9.53
Shape 1407	4	8.74
Shape 1408	4	6.17
Shape 1409	16	8.92
Shape 1410	4	9.9
Shape 1411	16	8.7
Shape 1412	4	9.97
Shape 1413	1	4.16
Shape 1414	16	8.16
Shape 1415	4	10.57
Shape 1416	16	9.06
Shape 1417	10	10.82
Shape 1418	10	12.67
Shape 1419	12	4.11
Shape 1420	10	12.48
Shape 1421	20	3.99
Shape 1422	1	3.74
Shape 1423	14	3.79
Shape 1424	1	3.82
Shape 1425	14	3.65
Shape 1426	9	3.05
Shape 1427	12	3.82
Shape 1428	4	8.32
Shape 1429	14	3.42
Shape 1430	1	2.99
Shape 1431	12	3.67
Shape 1432	4	9.19
Shape 1433	5	3.82
Shape 1434	10	2.77
Shape 1435	14	4.01
Shape 1436	10	3.83
Shape 1437	14	4.04
Shape 1438	10	3.42
Shape 1439	14	4.09
Shape 1440	10	3.55
Shape 1441	14	4.35
Shape 1442	4	7.86
Shape 1443	14	4.74
Shape 1444	4	7.43
Shape 1445	14	4.17
Shape 1446	20	12.54
Shape 1447	5	4.08
Shape 1448	4	10.8
Shape 1449	14	4.39
Shape 1450	4	2.15
Shape 1451	4	2.96
Shape 1452	4	9.35
Shape 1453	5	4.62
Shape 1454	1	8.96
Shape 1455	14	4.46
Shape 1456	1	2.7
Shape 1457	16	4.82
Shape 1458	14	4.48
Shape 1459	1	3.44
Shape 1460	5	4.91
Shape 1461	10	3.12
Shape 1462	10	4.96
Shape 1463	6	3.14
Shape 1464	14	4.75
Shape 1465	10	7.02
Shape 1466	6	4.28
Shape 1467	14	4.55
Shape 1468	6	4.12
Shape 1469	18	4.79
Shape 1470	6	3.45
Shape 1471	10	5.2
Shape 1472	8	4.73
Shape 1473	1	11.48
Shape 1474	10	3.74
Shape 1475	18	5.28
Shape 1476	6	2.36
Shape 1477	1	4.19
Shape 1478	18	5.43
Shape 1479	4	5.5
Shape 1480	1	9.29
Shape 1481	10	4.81
Shape 1482	10	3.6
Shape 1483	14	4.76
Shape 1484	4	3.02
Shape 1485	1	10.34
Shape 1486	14	4.86
Shape 1487	10	3.99
Shape 1488	2	6.3
Shape 1489	18	5.22
Shape 1490	4	10.62
Shape 1491	18	5.44
Shape 1492	10	4.98
Shape 1493	1	6.69
Shape 1494	10	4.69
Shape 1495	1	11.75
Shape 1496	4	10.19
Shape 1497	18	5.11
Shape 1498	1	11.71
Shape 1499	11	2.42
Shape 1500	14	4.74
Shape 1501	20	12.81
Shape 1502	19	5.69
Shape 1503	17	6.37
Shape 1504	6	2.7
Shape 1505	2	10.27
Shape 1506	1	4.99
Shape 1507	17	6.61
Shape 1508	6	2.71
Shape 1509	1	8.65
Shape 1510	10	5.96
Shape 1511	7	3.6
Shape 1512	1	8.6
Shape 1513	4	3.36
Shape 1514	4	2.62
Shape 1515	10	6.13
Shape 1516	17	2.59
Shape 1517	1	4.99
Shape 1518	6	2.53
Shape 1519	17	7.02
Shape 1520	20	14.56
Shape 1521	5	4.73
Shape 1522	13	6.22
Shape 1523	5	3.66
Shape 1524	4	2.15
Shape 1525	3	13.77
Shape 1526	11	5.03
Shape 1527	16	4.82
Shape 1528	13	5.78
Shape 1529	2	3.04
Shape 1530	7	7.46
Shape 1531	16	3.67
Shape 1532	7	16.29
Shape 1533	8	5.7
Shape 1534	12	5.35
Shape 1535	14	3.64
Shape 1536	6	2.37
Shape 1537	3	2.44
Shape 1538	11	2.88
Shape 1539	1	9
Shape 1540	12	4.19
Shape 1541	6	2.72
Shape 1542	5	5.7
Shape 1543	1	7.56
Shape 1544	12	4.36
Shape 1545	13	7.35
Shape 1546	9	2.15
Shape 1547	20	12.8
Shape 1548	1	2.99
Shape 1549	4	4.85
Shape 1550	6	2.34
Shape 1551	14	3.61
Shape 1552	20	13.83
Shape 1553	12	4.49
Shape 1554	18	8.33
Shape 1555	4	2.14
Shape 1556	6	4.2
Shape 1557	12	4.03
Shape 1558	1	2.39
Shape 1559	5	2.6
Shape 1560	7	4.47
Shape 1561	12	4.59
Shape 1562	6	2.72
Shape 1563	1	3.14
Shape 1564	19	2.63
Shape 1565	1	3.26
Shape 1566	12	4.66
Shape 1567	3	2.12
Shape 1568	10	4.73
Shape 1569	4	2.92
Shape 1570	4	4.36
Shape 1571	12	4.91
Shape 1572	5	1.37
Shape 1573	3	4.35
Shape 1574	12	4.24
Shape 1575	1	2.46
Shape 1576	16	4.27
Shape 1577	6	3.71
Shape 1578	12	4.21
Shape 1579	1	2.64
Shape 1580	3	3.04
Shape 1581	12	3.54
Shape 1582	6	1.54
Shape 1583	10	3.2
Shape 1584	2	2.36
Shape 1585	12	3.54
Shape 1586	10	3.65
Shape 1587	6	3.96
Shape 1588	3	2.12
Shape 1589	15	3.25
Shape 1590	12	1.74
Shape 1591	10	3.46
Shape 1592	11	3.58
Shape 1593	15	3.5
Shape 1594	13	3.1
Shape 1595	5	2.16
Shape 1596	10	4.77
Shape 1597	15	3.64
Shape 1598	4	2.58
Shape 1599	9	3.37
Shape 1600	4	2.62
Shape 1601	15	3.62
Shape 1602	4	2.54
Shape 1603	6	5.42
Shape 1604	15	3.47
Shape 1605	3	1.92
Shape 1606	9	4.09
Shape 1607	15	3.65
Shape 1608	11	2.09
Shape 1609	7	7.97
Shape 1610	18	4.13
Shape 1611	11	2.79
Shape 1612	10	2.65
Shape 1613	15	3.51
Shape 1614	7	5.53
Shape 1615	3	3.14
Shape 1616	15	3.46
Shape 1617	12	4.07
Shape 1618	1	4.38
Shape 1619	2	4.18
Shape 1620	3	1.73
Shape 1621	15	3.42
Shape 1622	6	5.66
Shape 1623	18	4.44
Shape 1624	5	2.1
Shape 1625	15	3.36
Shape 1626	10	5.99
Shape 1627	17	5.48
Shape 1628	18	3.36
Shape 1629	12	1.95
Shape 1630	15	3.23
Shape 1631	4	3.35
Shape 1632	13	4.35
Shape 1633	19	4.24
Shape 1634	7	2.41
Shape 1635	15	3.23
Shape 1636	7	4.14
Shape 1637	6	2.45
Shape 1638	15	3.01
Shape 1639	16	4.14
Shape 1640	9	2.6
Shape 1641	3	3.56
Shape 1642	7	4.37
Shape 1643	2	2.38
Shape 1644	15	3.26
Shape 1645	2	3.86
Shape 1646	2	1.69
Shape 1647	15	3.12
Shape 1648	18	3.89
Shape 1649	6	4.32
Shape 1650	17	1.62
Shape 1651	15	3.06
Shape 1652	6	3.71
Shape 1653	14	2.09
Shape 1654	15	3.5
Shape 1655	17	5.33
Shape 1656	16	4.34
Shape 1657	12	2.49
Shape 1658	15	3.33
Shape 1659	16	6.31
Shape 1660	17	3.42
Shape 1661	15	3.57
Shape 1662	4	4.36
Shape 1663	4	4.63
Shape 1664	6	4.48
Shape 1665	18	3.01
Shape 1666	15	3.6
Shape 1667	6	4.56
Shape 1668	10	3.76
Shape 1669	15	3.33
Shape 1670	9	5.63
Shape 1671	10	2.92
Shape 1672	15	3.12
Shape 1673	16	4.82
Shape 1674	4	4.26
Shape 1675	6	1.63
Shape 1676	15	2.95
Shape 1677	4	3.75
Shape 1678	6	1.85
Shape 1679	15	2.81
Shape 1680	4	3.96
Shape 1681	9	2.06
Shape 1682	15	2.51
Shape 1683	4	4.08
Shape 1684	3	1.72
Shape 1685	15	2.73
Shape 1686	4	4.19
Shape 1687	3	1.96
Shape 1688	15	2.89
Shape 1689	7	4.06
Shape 1690	3	2.38
Shape 1691	20	2.32
Shape 1692	1	13.1
Shape 1693	17	3.53
Shape 1694	7	7.97
Shape 1695	6	2.11
Shape 1696	20	2.46
Shape 1697	3	10.58
Shape 1698	7	3.85
Shape 1699	6	2.68
Shape 1700	20	2.62
Shape 1701	17	4.14
Shape 1702	6	2.01
Shape 1703	20	3.17
Shape 1704	4	3.66
Shape 1705	19	4.1
Shape 1706	5	4.17
Shape 1707	7	2.3
Shape 1708	20	2.93
Shape 1709	17	3.02
Shape 1710	19	4.42
Shape 1711	17	4.03
Shape 1712	6	3.08
Shape 1713	20	3
Shape 1714	4	5.2
Shape 1715	4	2.85
Shape 1716	5	4.71
Shape 1717	4	2.36
Shape 1718	12	1.82
Shape 1719	20	2.85
Shape 1720	12	3.6
Shape 1721	5	3.15
Shape 1722	17	3.02
Shape 1723	14	4.97
Shape 1724	3	2.02
Shape 1725	14	2.88
Shape 1726	17	3.02
Shape 1727	3	4.3
Shape 1728	3	2.19
Shape 1729	20	2.83
Shape 1730	9	4.98
Shape 1731	6	4.32
Shape 1732	5	3.9
Shape 1733	12	2.34
Shape 1734	12	3.19
Shape 1735	17	5.21
Shape 1736	17	4.96
Shape 1737	8	9.45
Shape 1738	3	3.92
Shape 1739	3	3.58
Shape 1740	17	3.72
Shape 1741	17	3.72
Shape 1742	4	6.28
Shape 1743	17	3.91
Shape 1744	17	4.43
Shape 1745	17	4.89
Shape 1746	17	4.78
Shape 1747	17	4.7
Shape 1748	18	5.39
Shape 1749	17	5.18
Shape 1750	5	5.25
Shape 1751	5	4.99
Shape 1752	12	4.9
Shape 1753	3	5.64
Shape 1754	9	5.36
Shape 1755	3	4.73
Shape 1756	14	4.58
Shape 1757	14	5.72
Shape 1758	2	5.18
Shape 1759	9	4.39
Shape 1760	10	2.73
Shape 1761	2	5.2
Shape 1762	10	4.69
Shape 1763	14	5.11
Shape 1764	4	4.99
Shape 1765	20	4.6
Shape 1766	2	5.06
Shape 1767	3	4.37
Shape 1768	15	5.59
Shape 1769	2	5.35
Shape 1770	10	5.86
Shape 1771	18	7.43
Shape 1772	2	5.53
Shape 1773	3	9.2
Shape 1774	2	5.24
Shape 1775	2	6.16
Shape 1776	14	5.4
Shape 1777	6	6.32
Shape 1778	2	5.85
Shape 1779	12	7.27
Shape 1780	3	5.59
Shape 1781	2	5.53
Shape 1782	11	7.16
Shape 1783	15	7.93
Shape 1784	11	5.27
Shape 1785	11	4.66
Shape 1786	12	3.98
Shape 1787	8	3.55
Shape 1788	14	3.24
Shape 1789	14	3.59
Shape 1790	14	4.11
Shape 1791	3	4.2
Shape 1792	9	4.26
Shape 1793	13	3.55
Shape 1794	11	3.24
Shape 1795	11	2.84
Shape 1796	17	4.43
Shape 1797	11	3.75
Shape 1798	11	2.97
Shape 1799	3	2.88
Shape 1800	3	3.99
Shape 1801	7	5.83
Shape 1802	7	6.08
Shape 1803	1	4.87
Shape 1804	8	10.27
Shape 1805	10	4.96
Shape 1806	17	4.62
Shape 1807	17	4.62
Shape 1808	10	5.57
Shape 1809	10	5.66
Shape 1810	10	5.61
Shape 1811	10	7.12
Shape 1812	18	6.54
Shape 1813	10	4.42
Shape 1814	2	3.78
Shape 1815	2	2.82
Shape 1816	5	2.57
Shape 1817	5	2.96
Shape 1818	5	4.72
Shape 1819	10	6.47
Shape 1820	5	3.07
Shape 1821	5	3.1
Shape 1822	5	2.97
Shape 1823	14	3.4
Shape 1824	5	2.97
Shape 1825	6	1.51
Shape 1826	7	2.6
Shape 1827	20	4.65
Shape 1828	14	3.31
Shape 1829	14	3.3
Shape 1830	2	4.22
Shape 1831	9	4.6
Shape 1832	11	4.26
Shape 1833	5	2.54
Shape 1834	15	4.74
Shape 1835	2	2.4
Shape 1836	6	2.76
Shape 1837	13	6.89
Shape 1838	6	4.92
Shape 1839	18	4.45
Shape 1840	5	4.42
Shape 1841	5	3.48
Shape 1842	5	3.86
Shape 1843	5	3.56
Shape 1844	5	4
Shape 1845	18	3.89
Shape 1846	9	3.27
Shape 1847	7	3.42
Shape 1848	9	4.4
Shape 1849	9	5.38
Shape 1850	9	5.2
Shape 1851	14	4.07
Shape 1852	1	5.7
Shape 1853	10	4.73
Shape 1854	10	3.45
Shape 1855	2	3.49
Shape 1856	5	3.67
Shape 1857	7	4.12
Shape 1858	7	4.71
Shape 1859	7	4.2
Shape 1860	7	4.47
Shape 1861	9	4.79
Shape 1862	14	4.94
Shape 1863	7	5.36
Shape 1864	3	5.13
Shape 1865	7	4.43
Shape 1866	7	4.26
Shape 1867	18	3.84
Shape 1868	17	4.42
Shape 1869	7	4.1
Shape 1870	18	3.46
Shape 1871	9	4.04
Shape 1872	9	5.58
Shape 1873	1	3.68
Shape 1874	5	4.49
Shape 1875	6	1.89
Shape 1876	9	3.43
Shape 1877	18	4.37
Shape 1878	8	12.26
Shape 1879	7	4.73
Shape 1880	9	5.72
Shape 1881	11	4.6
Shape 1882	17	3.43
Shape 1883	5	4.74
Shape 1884	1	7.37
Shape 1885	4	3.77
Shape 1886	16	3.97
Shape 1887	5	3.38
Shape 1888	18	2.23
Shape 1889	17	2.61
Shape 1890	16	2.75
Shape 1891	13	2.96
Shape 1892	13	3.37
Shape 1893	13	2.89
Shape 1894	13	3.08
Shape 1895	9	3.18
Shape 1896	18	3.15
Shape 1897	18	3.56
Shape 1898	8	4.47
Shape 1899	9	3.97
Shape 1900	9	4.53
Shape 1901	2	5.43
Shape 1902	9	5.64
Shape 1903	8	8.52
Shape 1904	9	5.78
Shape 1905	7	5.71
Shape 1906	11	3.18
Shape 1907	2	3.06
Shape 1908	12	5.85
Shape 1909	13	4.16
Shape 1910	13	3.6
Shape 1911	13	4.52
Shape 1912	14	3.05
Shape 1913	14	3.03
Shape 1914	2	3.54
Shape 1915	13	4.42
Shape 1916	14	4.88
Shape 1917	3	4.22
Shape 1918	19	3.54
Shape 1919	2	4.27
Shape 1920	2	5.57
Shape 1921	16	3.65
Shape 1922	20	6
Shape 1923	1	8.53
Shape 1924	3	5.58
Shape 1925	9	5.79
Shape 1926	18	4.53
Shape 1927	9	3.88
Shape 1928	2	3.12
Shape 1929	3	4.44
Shape 1930	17	6.45
Shape 1931	2	4.08
Shape 1932	10	3.37
Shape 1933	7	6.1
Shape 1934	7	6.23
Shape 1935	11	3.84
Shape 1936	11	4.02
Shape 1937	3	3.19
Shape 1938	5	3.05
Shape 1939	1	3.97
Shape 1940	6	4.19
Shape 1941	6	3.99
Shape 1942	1	4.28
Shape 1943	6	3.97
Shape 1944	15	5.87
Shape 1945	1	3.59
Shape 1946	1	4.03
Shape 1947	6	5.13
Shape 1948	5	4.73
Shape 1949	6	2.75
Shape 1950	7	4
Shape 1951	4	4.04
Shape 1952	18	4.58
Shape 1953	10	7.97
Shape 1954	1	4.45
Shape 1955	2	4.97
Shape 1956	6	7.96
Shape 1957	2	5.81
Shape 1958	6	6.15
Shape 1959	9	4.61
Shape 1960	5	4.83
Shape 1961	1	5.63
Shape 1962	4	3.82
Shape 1963	6	4.03
Shape 1964	10	4.17
Shape 1965	5	3.76
Shape 1966	6	3.43
Shape 1967	9	4.68
Shape 1968	9	3.64
Shape 1969	6	4.14
Shape 1970	9	3.2
Shape 1971	9	3.58
Shape 1972	3	4.33
Shape 1973	9	5.35
Shape 1974	9	4.58
Shape 1975	5	3.8
Shape 1976	12	3.54
Shape 1977	9	2.29
Shape 1978	9	2.51
Shape 1979	3	1.83
Shape 1980	9	2.35
Shape 1981	9	2.17
Shape 1982	6	2.59
Shape 1983	9	2.72
Shape 1984	9	2.66
Shape 1985	1	9.28
Shape 1986	9	3.19
Shape 1987	1	5.57
Shape 1988	4	2.73
Shape 1989	17	3.24
Shape 1990	9	3.3
Shape 1991	5	3.37
Shape 1992	5	3.02
Shape 1993	5	3.38
Shape 1994	17	2.98
Shape 1995	5	3.19
Shape 1996	4	3.5
Shape 1997	4	3.22
Shape 1998	13	2.91
[truncated: 132 more rows]

## Sheet: cKO 20 Bin 400 Coord
Shape Modes output from VAMPIRE software (Phillip et al 2021) for segmented Piezo1-cKO keratinocytes . Column B used for generating frequency graphs in 3D/E.
Shape Number	Shape mode	Distance from cluster center
Shape 1	6	2.04
Shape 2	3	1.75
Shape 3	13	2.27
Shape 4	3	2.48
Shape 5	3	1.95
Shape 6	17	9.1
Shape 7	11	2.83
Shape 8	11	2.96
Shape 9	10	2.85
Shape 10	11	2.49
Shape 11	12	2.91
Shape 12	11	2.84
Shape 13	8	3.88
Shape 14	9	3.17
Shape 15	11	3.21
Shape 16	4	6.22
Shape 17	11	2.9
Shape 18	4	1.48
Shape 19	6	1.29
Shape 20	11	1.79
Shape 21	6	1.48
Shape 22	6	1.1
Shape 23	6	1.58
Shape 24	6	1.42
Shape 25	11	1.77
Shape 26	5	1.7
Shape 27	5	1.65
Shape 28	5	1.98
Shape 29	5	1.71
Shape 30	5	2.26
Shape 31	14	1.47
Shape 32	12	1.72
Shape 33	12	1.75
Shape 34	12	2.12
Shape 35	12	2.67
Shape 36	4	2.73
Shape 37	12	2.33
Shape 38	12	2.82
Shape 39	12	2.42
Shape 40	6	2.72
Shape 41	6	2.17
Shape 42	4	1.88
Shape 43	2	2.38
Shape 44	2	1.96
Shape 45	3	2.4
Shape 46	3	2.9
Shape 47	7	2.34
Shape 48	3	1.66
Shape 49	3	2.4
Shape 50	3	3.42
Shape 51	3	2.65
Shape 52	14	2.79
Shape 53	6	1.59
Shape 54	6	1.94
Shape 55	6	2.26
Shape 56	6	2.91
Shape 57	6	1.53
Shape 58	6	4.35
Shape 59	14	2.94
Shape 60	5	3
Shape 61	13	2.77
Shape 62	13	2.69
Shape 63	9	2.85
Shape 64	5	1.62
Shape 65	5	1.53
Shape 66	20	1.85
Shape 67	10	3
Shape 68	12	1.87
Shape 69	10	2.45
Shape 70	6	1.4
Shape 71	6	1.38
Shape 72	6	1.61
Shape 73	10	1.84
Shape 74	2	1.71
Shape 75	2	1.66
Shape 76	17	1.92
Shape 77	7	3.04
Shape 78	6	3.48
Shape 79	6	1.77
Shape 80	6	3.22
Shape 81	6	1.8
Shape 82	6	1.8
Shape 83	6	1.95
Shape 84	6	2.39
Shape 85	6	2.08
Shape 86	6	1.99
Shape 87	6	1.43
Shape 88	6	1.6
Shape 89	6	1.41
Shape 90	6	1.67
Shape 91	6	1.41
Shape 92	6	1.52
Shape 93	6	1.21
Shape 94	7	2.6
Shape 95	4	2.22
Shape 96	6	1.52
Shape 97	6	1.89
Shape 98	6	2.35
Shape 99	6	2.04
Shape 100	6	2.05
Shape 101	6	2.71
Shape 102	6	1.57
Shape 103	6	2.19
Shape 104	6	2.37
Shape 105	6	2.42
Shape 106	6	2.38
Shape 107	6	2.09
Shape 108	6	2.54
Shape 109	6	2.02
Shape 110	4	2.39
Shape 111	6	2.37
Shape 112	6	2.49
Shape 113	6	2.61
Shape 114	6	1.99
Shape 115	7	3.38
Shape 116	6	2.89
Shape 117	6	2.18
Shape 118	6	2.21
Shape 119	6	2.02
Shape 120	6	2.4
Shape 121	1	2.91
Shape 122	6	2.35
Shape 123	6	1.66
Shape 124	6	1.3
Shape 125	3	1.65
Shape 126	7	2.58
Shape 127	2	1.77
Shape 128	3	2.72
Shape 129	6	2.44
Shape 130	6	2.33
Shape 131	6	2.49
Shape 132	6	2.26
Shape 133	6	2.31
Shape 134	6	2.25
Shape 135	6	2
Shape 136	9	2.32
Shape 137	9	1.79
Shape 138	5	2.69
Shape 139	3	2.48
Shape 140	3	2.08
Shape 141	4	2.19
Shape 142	4	2.07
Shape 143	3	2.45
Shape 144	6	3.61
Shape 145	6	2.84
Shape 146	3	2.75
Shape 147	4	3.72
Shape 148	4	2.27
Shape 149	4	1.55
Shape 150	10	3.42
Shape 151	6	3.33
Shape 152	6	3.72
Shape 153	6	6.13
Shape 154	1	3.23
Shape 155	4	3.06
Shape 156	4	3.19
Shape 157	4	2.08
Shape 158	1	2.85
Shape 159	1	2.73
Shape 160	1	3.73
Shape 161	1	2.46
Shape 162	1	2.49
Shape 163	1	2.77
Shape 164	6	2.66
Shape 165	1	2.19
Shape 166	1	1.78
Shape 167	1	2.07
Shape 168	1	1.77
Shape 169	10	2.03
Shape 170	1	2.6
Shape 171	7	2.19
Shape 172	10	1.92
Shape 173	4	1.76
Shape 174	4	1.75
Shape 175	1	2.57
Shape 176	1	2.69
Shape 177	10	2.52
Shape 178	1	2.02
Shape 179	10	4.25
Shape 180	6	1.95
Shape 181	7	2.36
Shape 182	1	2.8
Shape 183	1	1.98
Shape 184	1	1.84
Shape 185	1	2.12
Shape 186	4	2.04
Shape 187	1	3.21
Shape 188	12	1.86
Shape 189	10	2.02
Shape 190	10	3.95
Shape 191	6	2.36
Shape 192	4	2.47
Shape 193	16	1.98
Shape 194	16	2.01
Shape 195	10	3.18
Shape 196	10	2.28
Shape 197	7	1.54
Shape 198	1	2.6
Shape 199	6	2.26
Shape 200	4	2.4
Shape 201	6	1.44
Shape 202	1	2.77
Shape 203	15	3.62
Shape 204	12	1.92
Shape 205	15	4.79
Shape 206	2	2.33
Shape 207	7	2.26
Shape 208	6	2.17
Shape 209	6	0.9
Shape 210	5	1.74
Shape 211	11	1.28
Shape 212	5	1.87
Shape 213	14	1.48
Shape 214	14	2.02
Shape 215	12	1.77
Shape 216	12	1.83
Shape 217	2	1.74
Shape 218	12	1.84
Shape 219	11	2.01
Shape 220	12	1.7
Shape 221	8	1.53
Shape 222	8	1.98
Shape 223	11	2.17
Shape 224	4	2.79
Shape 225	16	3.06
Shape 226	9	3.96
Shape 227	18	3.56
Shape 228	11	2.59
Shape 229	2	2.97
Shape 230	5	3.59
Shape 231	9	4.19
Shape 232	6	2.27
Shape 233	8	2.15
Shape 234	3	2.39
Shape 235	8	2.34
Shape 236	19	1.98
Shape 237	2	2.17
Shape 238	12	3.03
Shape 239	12	3.46
Shape 240	12	3.06
Shape 241	2	3.03
Shape 242	2	1.9
Shape 243	12	2.75
Shape 244	3	4.31
Shape 245	20	5.43
Shape 246	4	4.82
Shape 247	19	2.51
Shape 248	12	2.42
Shape 249	12	2.87
Shape 250	13	2.59
Shape 251	18	2.63
Shape 252	5	2.45
Shape 253	3	1.8
Shape 254	4	2.56
Shape 255	15	5.88
Shape 256	8	1.62
Shape 257	11	2.27
Shape 258	11	1.61
Shape 259	16	2.16
Shape 260	7	3
Shape 261	8	1.95
Shape 262	14	2.7
Shape 263	8	3.55
Shape 264	10	3.06
Shape 265	11	2.26
Shape 266	8	1.95
Shape 267	14	3.52
Shape 268	8	2.52
Shape 269	8	1.73
Shape 270	9	2.53
Shape 271	5	1.53
Shape 272	4	1.34
Shape 273	8	2.34
Shape 274	4	2.4
Shape 275	5	1.96
Shape 276	5	2.28
Shape 277	12	1.82
Shape 278	14	2.07
Shape 279	1	3.68
Shape 280	5	1.53
Shape 281	5	2.38
Shape 282	12	2.03
Shape 283	8	1.82
Shape 284	8	1.89
Shape 285	8	1.98
Shape 286	5	2.06
Shape 287	5	1.91
Shape 288	2	2.32
Shape 289	2	2.01
Shape 290	3	2.08
Shape 291	12	1.6
Shape 292	14	2.59
Shape 293	14	2.33
Shape 294	5	2.22
Shape 295	4	1.68
Shape 296	2	1.62
Shape 297	8	2.67
Shape 298	5	1.99
Shape 299	2	1.76
Shape 300	4	1.73
Shape 301	2	1.56
Shape 302	12	1.61
Shape 303	5	1.72
Shape 304	5	1.67
Shape 305	4	1.73
Shape 306	8	1.73
Shape 307	12	1.85
Shape 308	5	1.38
Shape 309	14	4.18
Shape 310	12	1.76
Shape 311	12	1.39
Shape 312	4	1.47
Shape 313	4	1.37
Shape 314	5	1.43
Shape 315	14	2.03
Shape 316	5	1.61
Shape 317	3	1.33
Shape 318	10	2.34
Shape 319	14	1.59
Shape 320	12	1.61
Shape 321	5	1.4
Shape 322	2	1.26
Shape 323	6	1.48
Shape 324	6	1.58
Shape 325	12	1.46
Shape 326	19	1.71
Shape 327	8	1.94
Shape 328	6	3.41
Shape 329	11	2.04
Shape 330	15	7.26
Shape 331	1	13.05
Shape 332	12	1.32
Shape 333	10	3.59
Shape 334	6	1.21
Shape 335	6	1.3
Shape 336	6	1.53
Shape 337	6	1.55
Shape 338	3	1.42
Shape 339	14	1.59
Shape 340	12	1.3
Shape 341	12	1.79
Shape 342	12	1.2
Shape 343	12	1.83
Shape 344	12	1.62
Shape 345	12	1.76
Shape 346	14	1.45
Shape 347	5	1.3
Shape 348	5	1.31
Shape 349	13	1.6
Shape 350	12	1.74
Shape 351	7	1.62
Shape 352	5	1.81
Shape 353	11	1.68
Shape 354	12	1.37
Shape 355	8	2
Shape 356	8	1.48
Shape 357	8	1.46
Shape 358	12	1.92
Shape 359	12	1.56
Shape 360	19	2.21
Shape 361	2	2.77
Shape 362	3	1.79
Shape 363	19	1.66
Shape 364	12	1.64
Shape 365	19	1.58
Shape 366	19	2.33
Shape 367	19	2.5
Shape 368	19	1.89
Shape 369	19	2.1
Shape 370	14	1.68
Shape 371	14	2.04
Shape 372	14	1.67
Shape 373	12	1.7
Shape 374	18	2.38
Shape 375	6	1.89
Shape 376	2	2.31
Shape 377	6	2.26
Shape 378	2	1.78
Shape 379	8	1.9
Shape 380	11	1.47
Shape 381	12	1.3
Shape 382	12	2.17
Shape 383	19	1.45
Shape 384	19	1.82
Shape 385	12	1.61
Shape 386	8	1.99
Shape 387	8	1.78
Shape 388	3	2.19
Shape 389	2	2.65
Shape 390	19	2.28
Shape 391	3	2.61
Shape 392	12	2.69
Shape 393	6	2.88
Shape 394	9	3.4
Shape 395	9	3.9
Shape 396	2	2.72
Shape 397	10	7.78
Shape 398	10	4.06
Shape 399	5	3.2
Shape 400	12	3.28
Shape 401	8	4.34
Shape 402	11	5.27
Shape 403	11	3.02
Shape 404	4	6.23
Shape 405	4	5.75
Shape 406	12	6.02
Shape 407	8	1.79
Shape 408	20	4.33
Shape 409	2	5.52
Shape 410	5	9.85
Shape 411	1	9.97
Shape 412	14	1.91
Shape 413	12	6.12
Shape 414	2	4.42
Shape 415	20	8.89
Shape 416	15	3.07
Shape 417	11	1.8
Shape 418	20	4.74
Shape 419	14	4.89
Shape 420	19	6.74
Shape 421	12	6.39
Shape 422	2	1.53
Shape 423	15	3.97
Shape 424	11	6.7
Shape 425	16	4.03
Shape 426	19	6.02
Shape 427	5	1.7
Shape 428	1	10.01
Shape 429	8	5.07
Shape 430	19	3.73
Shape 431	1	14.37
Shape 432	9	2.34
Shape 433	1	10.99
Shape 434	8	5.44
Shape 435	20	5.92
Shape 436	10	3.24
Shape 437	1	5.88
Shape 438	4	5.95
Shape 439	8	6.94
Shape 440	5	1.78
Shape 441	8	2.79
Shape 442	4	6.53
Shape 443	8	12.14
Shape 444	18	6.98
Shape 445	15	3.07
Shape 446	6	1.96
Shape 447	15	8.56
Shape 448	18	7.76
Shape 449	11	8.88
Shape 450	6	1.33
Shape 451	13	4.92
Shape 452	14	3.71
Shape 453	14	1.94
Shape 454	2	6.79
Shape 455	19	6.49
Shape 456	14	2.14
Shape 457	15	4.16
Shape 458	9	3.29
Shape 459	8	6.63
Shape 460	8	4.07
Shape 461	17	5.49
Shape 462	12	1.66
Shape 463	15	7.77
Shape 464	5	6.94
Shape 465	20	4.69
Shape 466	12	1.22
Shape 467	14	5.19
Shape 468	10	6.11
Shape 469	14	5.9
Shape 470	12	1.25
Shape 471	1	6.32
Shape 472	10	7.33
Shape 473	15	6
Shape 474	7	2.97
Shape 475	16	5.33
Shape 476	4	2.87
Shape 477	9	2.22
Shape 478	10	8.69
Shape 479	17	3.01
Shape 480	11	4.07
Shape 481	1	5.27
Shape 482	1	5.71
Shape 483	10	9.62
Shape 484	12	2.49
Shape 485	1	9.37
Shape 486	10	4.24
Shape 487	11	3.86
Shape 488	10	7.7
Shape 489	10	6.44
Shape 490	20	2.25
Shape 491	1	12.66
Shape 492	16	4.81
Shape 493	11	4.12
Shape 494	6	3.72
Shape 495	10	5.23
Shape 496	12	2.24
Shape 497	1	8.71
Shape 498	10	7.53
Shape 499	8	4.67
Shape 500	7	3.79
Shape 501	10	6.57
Shape 502	10	7.79
Shape 503	12	1.95
Shape 504	8	4.52
Shape 505	8	4.04
Shape 506	1	3.98
Shape 507	1	5.65
Shape 508	12	2.64
Shape 509	1	9.56
Shape 510	8	4.66
Shape 511	13	4.27
Shape 512	12	2.34
Shape 513	8	4.57
Shape 514	13	4.96
Shape 515	1	4.53
Shape 516	12	2.65
Shape 517	1	8.53
Shape 518	10	10.77
Shape 519	11	4.37
Shape 520	14	4.46
Shape 521	12	1.78
Shape 522	2	4.42
Shape 523	14	4.02
Shape 524	4	4.09
Shape 525	12	1.94
Shape 526	10	9.53
Shape 527	2	4.04
Shape 528	11	4.43
Shape 529	12	1.99
Shape 530	16	3.24
Shape 531	11	4.35
Shape 532	12	2.04
Shape 533	1	8.85
Shape 534	16	1.93
Shape 535	11	3.74
Shape 536	19	1.61
Shape 537	1	9.78
Shape 538	11	2.11
Shape 539	1	7.64
Shape 540	11	3.41
Shape 541	11	2.23
Shape 542	9	3.7
Shape 543	11	3.48
Shape 544	19	2.34
Shape 545	6	1.87
Shape 546	11	3.53
Shape 547	11	2.34
Shape 548	1	9.75
Shape 549	6	2.34
Shape 550	11	3.32
Shape 551	19	2.97
Shape 552	5	2.42
Shape 553	11	3.21
Shape 554	11	2.97
Shape 555	1	9.38
Shape 556	4	2.17
Shape 557	11	2.8
Shape 558	16	1.98
Shape 559	4	1.94
Shape 560	11	2.78
Shape 561	16	2.14
Shape 562	1	10.17
Shape 563	10	2.83
Shape 564	11	2.48
Shape 565	16	2.05
Shape 566	6	4.26
Shape 567	11	1.89
Shape 568	5	1.83
Shape 569	6	5.21
Shape 570	11	2.31
Shape 571	5	2.04
Shape 572	6	5.69
Shape 573	11	2.59
Shape 574	5	1.69
Shape 575	6	5.64
Shape 576	11	2.47
Shape 577	5	1.76
Shape 578	10	5.94
Shape 579	11	2.94
Shape 580	6	1.95
Shape 581	1	8.71
Shape 582	14	4.96
Shape 583	11	2.84
Shape 584	5	2.14
Shape 585	1	10.66
Shape 586	3	6.7
Shape 587	11	2.32
Shape 588	1	5.69
Shape 589	5	1.88
Shape 590	3	7.62
Shape 591	11	2.15
Shape 592	5	1.38
Shape 593	1	5.07
Shape 594	11	2.59
Shape 595	12	1.81
Shape 596	6	2.35
Shape 597	11	2.38
Shape 598	4	1.88
Shape 599	10	7.84
Shape 600	6	1.86
Shape 601	11	2.44
Shape 602	4	1.81
Shape 603	6	1.71
Shape 604	11	3.14
Shape 605	4	2
Shape 606	6	1.87
Shape 607	11	2.79
Shape 608	1	3.83
Shape 609	4	2.25
Shape 610	6	2.4
Shape 611	11	3.52
Shape 612	4	3.82
Shape 613	4	1.96
Shape 614	6	1.96
Shape 615	11	2.79
Shape 616	5	2.32
Shape 617	4	2.26
Shape 618	6	2.16
Shape 619	11	3.39
Shape 620	1	6.55
Shape 621	5	1.98
Shape 622	6	1.93
Shape 623	11	3.69
Shape 624	14	2.11
Shape 625	7	3.04
Shape 626	2	3.7
Shape 627	14	2.37
Shape 628	6	1.91
Shape 629	11	3.29
Shape 630	14	2.36
Shape 631	1	11.31
Shape 632	4	1.51
Shape 633	11	3.49
Shape 634	5	2.24
Shape 635	2	1.98
Shape 636	11	4.64
Shape 637	13	2
Shape 638	1	7.62
Shape 639	17	6.72
Shape 640	5	2.21
Shape 641	17	6.47
Shape 642	5	2.45
Shape 643	17	3.91
Shape 644	4	2.64
Shape 645	17	3.63
Shape 646	4	3.17
Shape 647	14	4.14
Shape 648	2	3.27
Shape 649	4	2.58
Shape 650	10	10.04
Shape 651	17	4.12
Shape 652	6	1.71
Shape 653	14	4.09
Shape 654	9	2.2
Shape 655	8	4.1
Shape 656	3	2.48
Shape 657	14	3.81
Shape 658	9	1.84
Shape 659	14	4.23
Shape 660	3	1.92
Shape 661	8	4.36
Shape 662	2	2.39
Shape 663	16	5.88
Shape 664	11	1.72
Shape 665	8	4.9
Shape 666	18	9.48
Shape 667	4	2.65
Shape 668	16	4.71
Shape 669	11	2.3
Shape 670	10	4.27
Shape 671	19	3.67
Shape 672	11	2.42
Shape 673	7	2.15
Shape 674	19	3.97
Shape 675	11	2.55
Shape 676	6	1.77
Shape 677	19	3.69
Shape 678	10	5.86
Shape 679	13	2.41
Shape 680	4	1.42
Shape 681	19	3.58
Shape 682	1	7.23
Shape 683	2	2.06
Shape 684	4	2.39
Shape 685	19	3.53
Shape 686	1	2.8
Shape 687	2	2.25
Shape 688	4	2.52
Shape 689	19	3.63
Shape 690	1	5.39
Shape 691	2	2.37
Shape 692	8	5.61
Shape 693	7	4.08
Shape 694	7	1.86
Shape 695	19	4.35
Shape 696	2	3.09
Shape 697	4	2.24
Shape 698	8	3.31
Shape 699	4	4.47
Shape 700	4	3.52
Shape 701	19	3.89
Shape 702	2	3.47
Shape 703	3	1.8
Shape 704	8	3.49
Shape 705	4	7.94
Shape 706	1	8
Shape 707	2	2.71
Shape 708	8	4.12
Shape 709	1	7.99
Shape 710	2	2.53
Shape 711	8	3.33
Shape 712	12	3.59
Shape 713	2	1.99
Shape 714	19	3.56
Shape 715	5	3.38
Shape 716	2	2.42
Shape 717	8	3.62
Shape 718	6	2.69
Shape 719	11	2.2
Shape 720	8	3.37
Shape 721	6	3.11
Shape 722	7	4.78
Shape 723	11	1.71
Shape 724	19	3.87
Shape 725	6	3.27
Shape 726	11	2.4
Shape 727	8	4.01
Shape 728	19	2.26
Shape 729	19	4.86
Shape 730	4	4.07
Shape 731	13	1.42
Shape 732	8	4.65
Shape 733	10	8.49
Shape 734	3	1.9
Shape 735	8	5.17
Shape 736	6	3.68
Shape 737	13	1.76
Shape 738	8	5.12
Shape 739	8	6.03
Shape 740	1	2.6
Shape 741	16	1.82
Shape 742	8	5.26
Shape 743	4	1.72
Shape 744	16	2.99
Shape 745	1	5.09
Shape 746	2	2.38
Shape 747	2	3.87
Shape 748	1	3.62
Shape 749	18	2.65
Shape 750	16	2.14
Shape 751	17	2.54
Shape 752	17	3.1
Shape 753	5	6.33
Shape 754	18	2.55
Shape 755	5	2.22
Shape 756	16	3.39
Shape 757	17	3.79
Shape 758	10	6.47
Shape 759	9	1.9
Shape 760	3	3.25
Shape 761	19	3.92
Shape 762	6	3.15
Shape 763	9	4.33
Shape 764	17	3.74
Shape 765	3	1.92
Shape 766	18	5.69
Shape 767	13	3.48
Shape 768	16	2.92
Shape 769	7	1.64
Shape 770	9	3.78
Shape 771	17	3.74
Shape 772	14	3.25
Shape 773	13	1.56
Shape 774	2	2.58
Shape 775	8	3.12
Shape 776	1	3.66
Shape 777	2	1.8
Shape 778	6	2.88
Shape 779	8	3.35
Shape 780	1	6.82
Shape 781	14	1.86
Shape 782	12	4.41
Shape 783	14	1.94
Shape 784	8	4.15
Shape 785	14	1.9
Shape 786	8	3.76
Shape 787	14	1.65
Shape 788	14	4.37
Shape 789	14	1.4
Shape 790	8	2.96
Shape 791	9	5.8
Shape 792	10	2.74
Shape 793	8	3.28
Shape 794	10	2.25
Shape 795	8	3.45
Shape 796	10	2.51
Shape 797	8	3.32
Shape 798	14	1.74
Shape 799	8	3.28
Shape 800	7	1.81
Shape 801	8	3.65
Shape 802	10	1.79
Shape 803	1	5.47
Shape 804	19	3.56
Shape 805	12	1.6
Shape 806	8	3.12
Shape 807	4	1.4
Shape 808	8	3.19
Shape 809	10	7.4
Shape 810	4	2.51
Shape 811	19	4
Shape 812	3	1.47
Shape 813	2	4.52
Shape 814	4	5.36
Shape 815	4	3.54
Shape 816	11	4.27
Shape 817	4	2.52
Shape 818	2	4.47
Shape 819	4	1.73
Shape 820	11	4.77
Shape 821	7	2.09
Shape 822	17	4.81
Shape 823	3	2.54
Shape 824	7	1.65
Shape 825	18	4.3
Shape 826	6	1.81
Shape 827	4	1.47
Shape 828	8	3.65
Shape 829	1	4.53
Shape 830	2	1.7
Shape 831	7	2.13
Shape 832	5	2.19
Shape 833	4	1.63
Shape 834	4	2.45
Shape 835	11	2.22
Shape 836	4	1.69
Shape 837	7	2.76
Shape 838	3	3.16
Shape 839	6	2.08
Shape 840	6	1.44
Shape 841	8	6.99
Shape 842	6	2.73
Shape 843	7	1.38
Shape 844	7	2.15
Shape 845	5	4.01
Shape 846	1	7.74
Shape 847	5	1.76
Shape 848	7	1.57
Shape 849	17	2.71
Shape 850	5	2.48
Shape 851	7	1.79
Shape 852	4	1.77
Shape 853	5	1.47
Shape 854	6	2.49
Shape 855	7	2.22
Shape 856	6	1.98
Shape 857	7	2.23
Shape 858	10	2.87
Shape 859	1	4.81
Shape 860	6	1.92
Shape 861	6	2.48
Shape 862	10	3.19
Shape 863	6	2.01
Shape 864	6	2.76
Shape 865	7	3.46
Shape 866	6	1.97
Shape 867	9	3.84
Shape 868	18	2.95
Shape 869	13	2.02
Shape 870	6	1.96
Shape 871	16	2.78
Shape 872	14	2.26
Shape 873	6	1.91
Shape 874	6	1.89
Shape 875	1	6.27
Shape 876	12	2.03
Shape 877	6	1.68
Shape 878	4	4.16
Shape 879	10	4.5
Shape 880	3	2.42
Shape 881	3	1.64
Shape 882	4	2.64
Shape 883	10	4.75
Shape 884	9	2.56
Shape 885	4	2.44
Shape 886	4	2.24
Shape 887	10	4.59
Shape 888	17	2.46
Shape 889	16	3.21
Shape 890	17	2.05
Shape 891	1	5.92
Shape 892	9	1.88
Shape 893	5	2.44
Shape 894	11	2.41
Shape 895	1	7.21
Shape 896	14	2.88
Shape 897	4	3.1
Shape 898	5	2.41
Shape 899	4	2.79
Shape 900	1	4.69
Shape 901	11	2.67
Shape 902	5	2.8
Shape 903	12	2.38
Shape 904	1	4.13
Shape 905	10	6.53
Shape 906	5	2.75
Shape 907	13	5.07
Shape 908	13	3.09
Shape 909	12	6.23
Shape 910	5	2.56
Shape 911	7	3.2
Shape 912	3	2.82
Shape 913	1	8.4
Shape 914	10	5.18
Shape 915	7	2.28
Shape 916	9	3.34
Shape 917	3	2.43
Shape 918	1	4.43
Shape 919	10	5.52
Shape 920	17	2.2
Shape 921	6	3.59
Shape 922	3	2.75
Shape 923	1	4.43
Shape 924	12	1.85
Shape 925	3	3.56
Shape 926	3	2.33
Shape 927	1	4.78
Shape 928	6	3.21
Shape 929	5	2.22
Shape 930	3	3.08
Shape 931	4	2.29
Shape 932	4	2.24
Shape 933	3	3.17
Shape 934	7	2.05
Shape 935	6	2.29
Shape 936	4	2.71
Shape 937	6	1.38
Shape 938	6	2.57
Shape 939	4	3.03
Shape 940	13	3.36
Shape 941	4	2.99
Shape 942	2	2.88
Shape 943	4	3.19
Shape 944	1	5.69
Shape 945	12	3.49
Shape 946	4	3.67
Shape 947	1	4.63
Shape 948	7	4.09
Shape 949	10	4.37
Shape 950	17	4.99
Shape 951	5	3.77
Shape 952	3	8.3
Shape 953	11	4.54
Shape 954	17	3.65
Shape 955	5	3.59
Shape 956	17	3.02
Shape 957	18	2.23
Shape 958	13	1.98
Shape 959	5	1.23
Shape 960	14	2.74
Shape 961	9	1.54
Shape 962	20	2.17
Shape 963	11	1.79
Shape 964	11	2.11
Shape 965	6	1.55
Shape 966	2	2.38
Shape 967	6	1.56
Shape 968	7	2.19
Shape 969	18	3.13
Shape 970	6	2.12
Shape 971	1	1.88
Shape 972	6	1.97
Shape 973	6	2.71
Shape 974	5	2.54
Shape 975	6	2.37
Shape 976	5	3.42
Shape 977	6	2.46
Shape 978	5	2.21
Shape 979	1	2.27
Shape 980	11	2.17
Shape 981	1	2.24
Shape 982	4	3.1
Shape 983	1	2.7
Shape 984	4	2.59
Shape 985	1	2.01
Shape 986	4	2.76
Shape 987	6	2.19
Shape 988	4	2.09
Shape 989	1	2.22
Shape 990	4	2.17
Shape 991	6	1.96
Shape 992	4	2.32
Shape 993	1	2.77
Shape 994	4	2.8
Shape 995	6	1.78
Shape 996	4	2.91
Shape 997	1	2
Shape 998	10	2.66
Shape 999	1	2.55
Shape 1000	2	2.18
Shape 1001	1	3.28
Shape 1002	9	3.26
Shape 1003	1	2.73
Shape 1004	13	2.21
Shape 1005	1	2.68
Shape 1006	6	2.17
Shape 1007	1	2.75
Shape 1008	6	2.02
Shape 1009	1	2.61
Shape 1010	5	1.92
Shape 1011	1	2.44
Shape 1012	6	2.19
Shape 1013	1	1.96
Shape 1014	6	2.36
Shape 1015	6	2.01
Shape 1016	6	1.95
Shape 1017	6	1.91
Shape 1018	9	1.91
Shape 1019	6	1.96
Shape 1020	6	2.01
Shape 1021	6	1.78
Shape 1022	6	2.11
Shape 1023	6	1.93
Shape 1024	6	1.79
Shape 1025	6	2.52
Shape 1026	4	1.55
Shape 1027	6	2.39
Shape 1028	10	2.56
Shape 1029	6	2.41
Shape 1030	17	2.43
Shape 1031	6	2.43
Shape 1032	13	1.77
Shape 1033	6	2.39
Shape 1034	12	2.37
Shape 1035	6	2.2
Shape 1036	13	2.92
Shape 1037	6	2.39
Shape 1038	17	2.98
Shape 1039	6	2.13
Shape 1040	3	3.19
Shape 1041	6	1.75
Shape 1042	5	3.37
Shape 1043	6	2.43
Shape 1044	5	2.31
Shape 1045	6	1.81
Shape 1046	5	2.14
Shape 1047	6	1.66
Shape 1048	12	1.67
Shape 1049	6	2.15
Shape 1050	12	1.84
Shape 1051	6	1.61
Shape 1052	12	1.54
Shape 1053	6	1.71
Shape 1054	12	1.65
Shape 1055	6	1.46
Shape 1056	12	1.83
Shape 1057	7	1.81
Shape 1058	5	2.23
Shape 1059	2	1.71
Shape 1060	5	2.34
Shape 1061	7	1.83
Shape 1062	5	2.26
Shape 1063	6	2.26
Shape 1064	5	2.66
Shape 1065	4	3.83
Shape 1066	7	4.48
Shape 1067	16	6.51
Shape 1068	14	7.19
Shape 1069	2	7.49
Shape 1070	2	3.91
Shape 1071	3	1.94
Shape 1072	14	2.34
Shape 1073	6	2.24
Shape 1074	20	4.15
Shape 1075	7	5.42
Shape 1076	5	5.12
Shape 1077	20	7.81
Shape 1078	14	2.92
Shape 1079	16	2.54
Shape 1080	5	2.55
Shape 1081	19	6.1
Shape 1082	20	3.44
Shape 1083	7	5.07
Shape 1084	4	5.52
Shape 1085	10	3.64
Shape 1086	10	3.27
Shape 1087	3	3.36
Shape 1088	14	3.66
Shape 1089	6	2.95
Shape 1090	3	3.31
Shape 1091	1	4.72
Shape 1092	6	5.36
Shape 1093	10	6.23
Shape 1094	12	6.63
Shape 1095	10	2.71
Shape 1096	4	2.08
Shape 1097	13	3.27
Shape 1098	6	2.42
Shape 1099	11	3.48
Shape 1100	10	3.38
Shape 1101	3	4.91
Shape 1102	7	8.01
Shape 1103	4	8.8
Shape 1104	6	2.01
Shape 1105	18	3.89
Shape 1106	3	3.42
Shape 1107	18	5.41
Shape 1108	8	2.71
Shape 1109	10	3.02
Shape 1110	7	5.03
Shape 1111	7	7.14
Shape 1112	10	2.99
Shape 1113	19	2.46
Shape 1114	10	6.3
Shape 1115	20	2.58
Shape 1116	6	2.78
Shape 1117	10	4.86
Shape 1118	1	5.06
Shape 1119	12	4.6
Shape 1120	4	4.66
Shape 1121	15	5.27
Shape 1122	4	2.5
Shape 1123	13	2.93
Shape 1124	5	2.3
Shape 1125	5	4.11
Shape 1126	12	3.84
Shape 1127	10	3.18
Shape 1128	3	5.6
Shape 1129	2	6.85
Shape 1130	10	3.57
Shape 1131	13	2.66
Shape 1132	10	3.51
Shape 1133	5	4.37
Shape 1134	5	3.51
Shape 1135	4	12
Shape 1136	3	5.55
Shape 1137	11	4.8
Shape 1138	10	3.42
Shape 1139	6	1.45
Shape 1140	5	2.71
Shape 1141	13	3.18
Shape 1142	5	4.41
Shape 1143	10	8.49
Shape 1144	3	4.91
Shape 1145	10	5.4
Shape 1146	7	3.05
Shape 1147	2	3.82
Shape 1148	9	3.61
Shape 1149	5	3.36
Shape 1150	7	2.55
Shape 1151	7	4.49
Shape 1152	17	7.15
Shape 1153	14	5.65
Shape 1154	10	3.26
Shape 1155	10	3.03
Shape 1156	2	2.62
Shape 1157	5	3.62
Shape 1158	10	13.33
Shape 1159	3	4.71
Shape 1160	10	8.36
Shape 1161	17	2.06
Shape 1162	5	2.18
Shape 1163	6	2.19
Shape 1164	10	3.62
Shape 1165	5	4.05
Shape 1166	20	3
Shape 1167	3	5.28
Shape 1168	10	6.77
Shape 1169	6	1.89
Shape 1170	1	3.05
Shape 1171	2	5.84
Shape 1172	5	4.09
Shape 1173	7	3.03
Shape 1174	3	4.91
Shape 1175	10	6.34
Shape 1176	6	2.35
Shape 1177	10	2.92
Shape 1178	11	2.75
Shape 1179	12	3.88
Shape 1180	5	3.91
Shape 1181	3	5.89
Shape 1182	5	6.51
Shape 1183	10	2.77
Shape 1184	6	1.94
Shape 1185	6	2.23
Shape 1186	2	3.04
Shape 1187	5	3.73
Shape 1188	9	3.04
Shape 1189	7	6.09
Shape 1190	10	8
Shape 1191	6	3.48
Shape 1192	4	2.98
Shape 1193	11	3.05
Shape 1194	9	3.71
Shape 1195	5	2.41
Shape 1196	3	5.57
Shape 1197	10	6.38
Shape 1198	6	2.58
Shape 1199	6	2.97
Shape 1200	2	3.14
Shape 1201	5	4.11
Shape 1202	5	3.66
Shape 1203	7	5.3
Shape 1204	18	4.95
Shape 1205	4	2.05
Shape 1206	6	2.06
Shape 1207	11	2.79
Shape 1208	17	3.64
Shape 1209	5	2.71
Shape 1210	7	4.87
Shape 1211	17	4.76
Shape 1212	7	4.1
Shape 1213	10	2.83
Shape 1214	11	2.78
Shape 1215	17	3.55
Shape 1216	6	2.41
Shape 1217	11	5.89
Shape 1218	10	5.39
Shape 1219	6	2.8
Shape 1220	10	3.36
Shape 1221	11	1.93
Shape 1222	17	4.2
Shape 1223	7	1.67
Shape 1224	7	4.99
Shape 1225	10	7.27
Shape 1226	2	5.07
Shape 1227	4	3.49
Shape 1228	7	2.05
Shape 1229	2	2.2
Shape 1230	17	3.88
Shape 1231	6	1.64
Shape 1232	3	4.38
Shape 1233	1	5.64
Shape 1234	12	1.84
Shape 1235	7	3.15
Shape 1236	2	1.99
Shape 1237	12	4.52
Shape 1238	5	2.78
Shape 1239	3	5.72
Shape 1240	10	4.36
Shape 1241	7	4.33
Shape 1242	11	4.2
Shape 1243	10	2.98
Shape 1244	17	4.75
Shape 1245	5	2.52
Shape 1246	7	4.7
Shape 1247	16	5.15
Shape 1248	20	2.02
Shape 1249	2	2.69
Shape 1250	19	2.49
Shape 1251	13	4.05
Shape 1252	4	3.23
Shape 1253	3	4.64
Shape 1254	16	7.37
Shape 1255	4	1.83
Shape 1256	2	1.89
Shape 1257	11	2.51
Shape 1258	1	4.07
Shape 1259	3	3.33
Shape 1260	11	5.39
Shape 1261	10	6.01
Shape 1262	13	1.85
Shape 1263	6	2.43
Shape 1264	11	3.02
Shape 1265	17	4.81
Shape 1266	14	7.14
Shape 1267	2	5.17
Shape 1268	10	4.85
Shape 1269	9	3.61
Shape 1270	4	4.47
Shape 1271	2	5.09
Shape 1272	13	4.52
Shape 1273	12	1.79
Shape 1274	3	5.42
Shape 1275	10	4.04
Shape 1276	11	1.72
Shape 1277	9	3.67
Shape 1278	19	3.05
Shape 1279	16	3.86
Shape 1280	4	2.28
Shape 1281	4	5.07
Shape 1282	10	5.06
Shape 1283	4	3.1
Shape 1284	17	2.66
Shape 1285	6	2.73
Shape 1286	6	2.68
Shape 1287	16	4.58
Shape 1288	8	2.11
Shape 1289	7	4.62
Shape 1290	10	5.45
Shape 1291	16	3.32
Shape 1292	17	2.63
Shape 1293	10	3.03
Shape 1294	13	4.48
Shape 1295	2	5.33
Shape 1296	16	4.01
Shape 1297	8	2.1
Shape 1298	7	4.96
Shape 1299	10	5.6
Shape 1300	6	2.81
Shape 1301	1	2.54
Shape 1302	11	2.25
Shape 1303	6	1.59
Shape 1304	16	4.01
Shape 1305	13	2.52
Shape 1306	3	5.48
Shape 1307	10	5.29
Shape 1308	2	2.45
Shape 1309	1	2.14
Shape 1310	12	6.17
Shape 1311	13	2.28
Shape 1312	6	2.51
Shape 1313	16	4.02
Shape 1314	13	3.61
Shape 1315	3	4.97
Shape 1316	5	3.89
Shape 1317	4	2.63
Shape 1318	14	2.38
Shape 1319	12	1.84
Shape 1320	6	1.94
Shape 1321	16	4.19
Shape 1322	5	3.04
Shape 1323	3	5.57
Shape 1324	18	7.02
Shape 1325	6	3.04
Shape 1326	10	2.64
Shape 1327	19	2.13
Shape 1328	6	1.93
Shape 1329	16	4.27
Shape 1330	13	4.37
Shape 1331	7	5.02
Shape 1332	12	5.21
Shape 1333	10	1.57
Shape 1334	6	2.05
Shape 1335	7	2.02
Shape 1336	11	2.47
Shape 1337	6	2.29
Shape 1338	16	3.92
Shape 1339	4	2.63
Shape 1340	7	4.78
Shape 1341	9	4.8
Shape 1342	6	2.34
Shape 1343	9	3.07
Shape 1344	4	2.38
Shape 1345	6	2.37
Shape 1346	16	4.28
Shape 1347	20	2.23
Shape 1348	7	4.43
Shape 1349	10	4.36
Shape 1350	3	2.69
Shape 1351	10	2.93
Shape 1352	9	5.88
Shape 1353	13	2.17
Shape 1354	7	2.12
Shape 1355	16	4.03
Shape 1356	6	5.18
Shape 1357	3	4.94
Shape 1358	1	5.01
Shape 1359	6	2.59
Shape 1360	9	2.43
Shape 1361	8	2.67
Shape 1362	6	2.52
Shape 1363	16	4.41
Shape 1364	7	3.68
Shape 1365	7	4.89
Shape 1366	10	6.56
Shape 1367	17	2.97
Shape 1368	10	5.79
Shape 1369	17	3.05
Shape 1370	6	1.95
Shape 1371	16	4.31
Shape 1372	4	3.77
Shape 1373	7	4.53
Shape 1374	9	3.55
Shape 1375	6	2.19
Shape 1376	13	3
Shape 1377	13	2.81
Shape 1378	6	2.18
Shape 1379	16	3.91
Shape 1380	14	2.46
Shape 1381	3	5.1
Shape 1382	17	5.4
Shape 1383	2	7.58
Shape 1384	6	2.24
Shape 1385	14	3.04
Shape 1386	5	2.85
Shape 1387	6	2.32
Shape 1388	17	4.2
Shape 1389	10	2.6
Shape 1390	3	4.8
Shape 1391	18	5.09
Shape 1392	6	2.32
Shape 1393	2	2.87
Shape 1394	11	2.54
Shape 1395	6	2.89
Shape 1396	16	4.28
Shape 1397	20	2.22
Shape 1398	4	5.49
Shape 1399	14	5.42
Shape 1400	3	2.26
Shape 1401	10	2.82
Shape 1402	11	2.23
Shape 1403	6	2.78
Shape 1404	18	4.02
Shape 1405	11	4.36
Shape 1406	8	3.99
Shape 1407	20	3.39
Shape 1408	7	5.36
Shape 1409	18	6.06
Shape 1410	6	2.12
Shape 1411	5	2.12
Shape 1412	11	3.06
Shape 1413	4	2.78
Shape 1414	17	4.83
Shape 1415	12	1.89
Shape 1416	7	5.1
Shape 1417	1	4.9
Shape 1418	11	3.17
Shape 1419	5	2.95
Shape 1420	5	2.58
Shape 1421	2	6.46
Shape 1422	16	4.07
Shape 1423	6	2.34
Shape 1424	7	4.85
Shape 1425	10	6.78
Shape 1426	6	2.5
Shape 1427	17	3.14
Shape 1428	13	5.02
Shape 1429	16	4.07
Shape 1430	2	2.83
Shape 1431	3	5.23
Shape 1432	14	5.52
Shape 1433	5	2.55
Shape 1434	6	2.56
Shape 1435	4	2.88
Shape 1436	2	6.11
Shape 1437	17	4.21
Shape 1438	11	2.86
Shape 1439	7	5.85
Shape 1440	18	6.97
Shape 1441	6	2.3
Shape 1442	6	2.6
Shape 1443	13	3.57
Shape 1444	17	3.71
Shape 1445	19	2.59
Shape 1446	3	4.87
Shape 1447	10	6.93
Shape 1448	10	4.34
Shape 1449	6	2.56
Shape 1450	5	2.54
Shape 1451	14	3.42
Shape 1452	17	3.65
Shape 1453	11	1.83
Shape 1454	3	5.36
Shape 1455	10	5.65
Shape 1456	6	2.34
Shape 1457	6	4.66
Shape 1458	3	5.12
Shape 1459	2	3.53
Shape 1460	7	5.24
Shape 1461	17	3.97
Shape 1462	17	2.47
Shape 1463	7	4.72
Shape 1464	18	6.22
Shape 1465	6	2.07
Shape 1466	6	3.02
Shape 1467	13	3.43
Shape 1468	16	4.06
Shape 1469	5	2.18
Shape 1470	3	5.27
Shape 1471	18	4.37
Shape 1472	6	2.19
Shape 1473	10	3.31
Shape 1474	7	2.08
Shape 1475	2	2.54
Shape 1476	16	3.96
Shape 1477	5	3.09
Shape 1478	3	5.64
Shape 1479	16	4.81
Shape 1480	4	3.32
Shape 1481	13	2.03
Shape 1482	9	3.54
Shape 1483	17	3.85
Shape 1484	11	2.32
Shape 1485	7	5.54
Shape 1486	7	4.16
Shape 1487	13	2.4
Shape 1488	5	1.9
Shape 1489	12	3.08
Shape 1490	17	5.16
Shape 1491	4	3.01
Shape 1492	3	6.01
Shape 1493	14	5.6
Shape 1494	16	4.67
Shape 1495	6	2.1
Shape 1496	4	2.7
Shape 1497	9	2.84
Shape 1498	16	3.54
Shape 1499	10	5.07
Shape 1500	7	4.66
Shape 1501	16	6.92
Shape 1502	3	2.32
Shape 1503	6	2.85
Shape 1504	9	2.95
Shape 1505	17	4.25
Shape 1506	13	3.1
Shape 1507	3	4.95
Shape 1508	9	5.09
Shape 1509	4	3.17
Shape 1510	11	2.5
Shape 1511	10	3.47
Shape 1512	17	3.83
Shape 1513	17	2.27
Shape 1514	3	4.81
Shape 1515	10	4.67
Shape 1516	6	2.53
Shape 1517	6	3.19
Shape 1518	3	2.95
Shape 1519	17	3.33
Shape 1520	5	2.67
Shape 1521	7	5.27
Shape 1522	9	4.33
Shape 1523	6	2.27
Shape 1524	3	2.7
Shape 1525	3	2.62
Shape 1526	16	3.46
Shape 1527	6	2.52
Shape 1528	3	5.78
Shape 1529	9	4.22
Shape 1530	6	2.05
Shape 1531	7	2.94
Shape 1532	3	3.54
Shape 1533	16	3.92
Shape 1534	6	2.99
Shape 1535	7	4.7
Shape 1536	17	4.66
Shape 1537	11	1.64
Shape 1538	6	2.75
Shape 1539	2	2.77
Shape 1540	3	3.09
Shape 1541	17	4.31
Shape 1542	2	3.23
Shape 1543	3	5.81
Shape 1544	14	2.73
Shape 1545	6	3.32
Shape 1546	7	3.12
Shape 1547	11	4.32
Shape 1548	9	4.74
Shape 1549	6	2.58
Shape 1550	14	4.42
Shape 1551	4	4.39
Shape 1552	6	2.31
Shape 1553	6	2
Shape 1554	3	3.36
Shape 1555	17	3.57
Shape 1556	7	2.43
Shape 1557	3	5.58
Shape 1558	3	3.96
Shape 1559	6	2.63
Shape 1560	5	2.2
Shape 1561	16	2.52
Shape 1562	6	2.81
Shape 1563	15	4.53
Shape 1564	7	1.75
Shape 1565	7	4.72
Shape 1566	9	3.36
Shape 1567	7	2.27
Shape 1568	3	2.82
Shape 1569	3	4.49
Shape 1570	17	3.6
Shape 1571	7	2.68
Shape 1572	11	4.98
Shape 1573	5	5
Shape 1574	6	2.5
Shape 1575	6	2.92
Shape 1576	16	2.18
Shape 1577	7	2.77
Shape 1578	17	4.11
Shape 1579	9	2.45
Shape 1580	5	6.06
Shape 1581	11	4.51
Shape 1582	6	1.88
Shape 1583	17	1.9
Shape 1584	16	2.68
Shape 1585	6	2.78
Shape 1586	17	3.71
Shape 1587	9	2.97
Shape 1588	3	5.22
Shape 1589	16	3.51
Shape 1590	6	1.46
Shape 1591	11	3.07
Shape 1592	16	2.28
Shape 1593	6	2.96
Shape 1594	9	4.01
Shape 1595	5	2.05
Shape 1596	3	6.07
Shape 1597	13	3.83
Shape 1598	2	2.9
Shape 1599	10	5.28
Shape 1600	2	5.24
Shape 1601	17	3.84
Shape 1602	5	1.89
Shape 1603	7	5.89
Shape 1604	8	4.24
Shape 1605	10	3.03
Shape 1606	19	1.82
Shape 1607	16	2.35
Shape 1608	6	2.13
Shape 1609	9	4.07
Shape 1610	16	2.54
Shape 1611	3	5.55
Shape 1612	13	2.32
Shape 1613	2	2.79
Shape 1614	12	1.99
Shape 1615	16	2.42
Shape 1616	4	2.77
Shape 1617	9	4.16
Shape 1618	18	2.18
Shape 1619	7	5.04
Shape 1620	9	3.87
Shape 1621	4	2.78
Shape 1622	8	5.14
Shape 1623	17	4.34
Shape 1624	14	4.76
Shape 1625	17	4.66
Shape 1626	17	2.98
Shape 1627	14	4.54
Shape 1628	9	2.1
Shape 1629	7	3.55
Shape 1630	8	2.25
Shape 1631	12	5.44
Shape 1632	17	4.14
Shape 1633	9	2.28
Shape 1634	7	5.13
Shape 1635	9	3.22
Shape 1636	12	2.42
Shape 1637	8	3.92
Shape 1638	14	4.43
Shape 1639	16	4.29
Shape 1640	11	2.63
Shape 1641	4	5.59
Shape 1642	10	4.08
Shape 1643	13	3.29
Shape 1644	16	3.15
Shape 1645	2	4.57
Shape 1646	9	4.13
Shape 1647	11	3.91
Shape 1648	7	4.6
Shape 1649	14	3.3
Shape 1650	14	2.33
Shape 1651	15	3.66
Shape 1652	6	2.56
Shape 1653	7	2.03
Shape 1654	9	3.88
Shape 1655	6	3.2
Shape 1656	7	5.12
Shape 1657	1	4.51
Shape 1658	2	1.94
Shape 1659	11	3.89
Shape 1660	4	3.98
Shape 1661	1	2.61
Shape 1662	17	4.16
Shape 1663	3	3.49
Shape 1664	3	5.09
Shape 1665	5	5.48
Shape 1666	11	2.8
Shape 1667	18	4.23
Shape 1668	5	2.12
Shape 1669	10	2.69
Shape 1670	16	4.06
Shape 1671	13	2.62
Shape 1672	3	6.3
Shape 1673	4	4.22
Shape 1674	4	3.5
Shape 1675	6	2.61
Shape 1676	6	3.28
Shape 1677	5	2.51
Shape 1678	6	2.03
Shape 1679	17	4.12
Shape 1680	6	2.69
Shape 1681	14	5.78
Shape 1682	9	4.79
Shape 1683	7	3.7
Shape 1684	6	2.42
Shape 1685	4	2.05
Shape 1686	6	2.68
Shape 1687	17	4.24
Shape 1688	11	2.42
Shape 1689	3	4.95
Shape 1690	5	2.83
Shape 1691	17	2.17
Shape 1692	2	3.09
Shape 1693	2	2.97
Shape 1694	10	2.82
Shape 1695	6	2.59
Shape 1696	9	4.95
Shape 1697	7	2.41
Shape 1698	7	5.19
Shape 1699	10	5.95
Shape 1700	4	2.47
Shape 1701	2	1.89
Shape 1702	4	2.71
Shape 1703	17	2.6
Shape 1704	6	2.35
Shape 1705	16	5.42
Shape 1706	3	1.87
Shape 1707	7	4.64
Shape 1708	15	3.89
Shape 1709	6	2.17
Shape 1710	5	2.07
Shape 1711	9	4.79
Shape 1712	11	4.11
Shape 1713	6	2.77
Shape 1714	16	4.98
Shape 1715	6	1.38
Shape 1716	7	5.04
Shape 1717	2	4.84
Shape 1718	4	3.17
Shape 1719	2	3.09
Shape 1720	17	1.85
Shape 1721	6	2.29
Shape 1722	16	4.92
Shape 1723	3	2.36
Shape 1724	7	5.17
Shape 1725	10	7.47
Shape 1726	6	2.71
Shape 1727	5	2.68
Shape 1728	13	2.37
Shape 1729	6	1.8
Shape 1730	12	3.35
Shape 1731	16	5.53
Shape 1732	6	2.54
Shape 1733	2	6.21
Shape 1734	20	3.31
Shape 1735	4	8.26
Shape 1736	7	2.68
Shape 1737	7	2.38
Shape 1738	13	3.38
Shape 1739	6	2.15
Shape 1740	16	4.64
Shape 1741	6	2.57
Shape 1742	14	4.86
Shape 1743	14	4.21
Shape 1744	6	3.02
Shape 1745	13	3.33
Shape 1746	6	3.17
Shape 1747	4	2.96
Shape 1748	6	2.79
Shape 1749	16	4.94
Shape 1750	7	2.47
Shape 1751	3	4.9
Shape 1752	10	5.43
Shape 1753	5	2.66
Shape 1754	3	2.76
Shape 1755	4	3.2
Shape 1756	5	2.61
Shape 1757	6	2.3
Shape 1758	17	4.61
Shape 1759	6	4.12
Shape 1760	7	5.52
Shape 1761	10	3.58
Shape 1762	14	4.69
Shape 1763	6	2.89
Shape 1764	13	2.96
Shape 1765	6	4.61
Shape 1766	19	2.8
Shape 1767	6	1.85
Shape 1768	1	5.51
Shape 1769	9	4.54
Shape 1770	10	2.93
Shape 1771	14	5.09
Shape 1772	10	5.09
Shape 1773	2	3.19
Shape 1774	2	3.53
Shape 1775	9	5.16
Shape 1776	11	2.26
Shape 1777	1	2.2
Shape 1778	9	4.58
Shape 1779	10	3.11
Shape 1780	7	5.01
Shape 1781	4	3.8
Shape 1782	10	4.95
Shape 1783	4	2.9
Shape 1784	11	3.4
Shape 1785	9	6.61
Shape 1786	11	3.14
Shape 1787	6	2.07
Shape 1788	9	5.49
Shape 1789	4	1.88
Shape 1790	7	4.43
Shape 1791	10	5.92
Shape 1792	5	2.56
Shape 1793	13	2.34
Shape 1794	11	3.62
Shape 1795	6	2.33
Shape 1796	9	6.43
Shape 1797	11	8.06
Shape 1798	2	2.62
Shape 1799	2	5.35
Shape 1800	1	3.42
Shape 1801	14	3.4
Shape 1802	13	2.71
Shape 1803	6	2.15
Shape 1804	14	3.81
Shape 1805	19	4.34
Shape 1806	13	6.08
Shape 1807	9	4.65
Shape 1808	3	2.8
Shape 1809	3	6.43
Shape 1810	10	3.26
Shape 1811	3	6.68
Shape 1812	5	2.24
Shape 1813	6	2.6
Shape 1814	8	4.15
Shape 1815	1	12.47
Shape 1816	9	5.88
Shape 1817	13	2.4
Shape 1818	7	4.65
Shape 1819	20	13.19
Shape 1820	14	4.41
Shape 1821	9	2.92
Shape 1822	6	1.67
Shape 1823	5	2.06
Shape 1824	13	3.29
Shape 1825	17	5.43
Shape 1826	10	2.66
Shape 1827	3	6.06
Shape 1828	10	3.33
Shape 1829	12	4.81
Shape 1830	6	2.88
Shape 1831	18	2.33
Shape 1832	2	3.41
Shape 1833	17	4.62
Shape 1834	17	3.35
Shape 1835	3	5.48
Shape 1836	10	1.77
Shape 1837	4	6.78
Shape 1838	3	2.74
Shape 1839	10	3.49
Shape 1840	10	5.36
Shape 1841	8	3.35
Shape 1842	16	4.43
Shape 1843	12	2.7
Shape 1844	4	5.41
Shape 1845	10	2.35
Shape 1846	5	4.88
Shape 1847	6	3.05
Shape 1848	9	2.71
Shape 1849	9	9.87
Shape 1850	8	3.46
Shape 1851	11	3.73
Shape 1852	9	6.07
Shape 1853	4	2.4
Shape 1854	14	4.55
Shape 1855	10	2.63
Shape 1856	11	2.91
Shape 1857	7	5.21
Shape 1858	9	5.86
Shape 1859	8	3.32
Shape 1860	16	4.04
Shape 1861	3	2.14
Shape 1862	7	5.52
Shape 1863	3	3.31
Shape 1864	10	4.38
Shape 1865	10	2.68
Shape 1866	10	2.73
Shape 1867	11	3.35
Shape 1868	2	2.3
Shape 1869	16	4.58
Shape 1870	3	1.92
Shape 1871	3	4.61
Shape 1872	4	8.26
Shape 1873	12	2.74
Shape 1874	2	3.35
Shape 1875	1	4.11
Shape 1876	6	2.29
Shape 1877	14	2.48
Shape 1878	2	3.08
Shape 1879	16	4.43
Shape 1880	13	3.76
Shape 1881	14	2.26
Shape 1882	3	5.67
Shape 1883	3	1.81
Shape 1884	10	5.12
Shape 1885	2	3.11
Shape 1886	6	2.58
Shape 1887	15	3.81
Shape 1888	7	3.38
Shape 1889	2	2.87
Shape 1890	9	4.81
Shape 1891	9	4.44
Shape 1892	14	5.08
Shape 1893	6	2.1
Shape 1894	3	5.65
Shape 1895	20	11.87
Shape 1896	12	5.37
Shape 1897	17	2.49
Shape 1898	8	3.32
Shape 1899	4	2.66
Shape 1900	2	2.62
Shape 1901	9	7.79
Shape 1902	8	5.65
Shape 1903	7	2.12
Shape 1904	7	4.61
Shape 1905	10	2.28
Shape 1906	3	3.48
Shape 1907	2	2.31
Shape 1908	4	2.82
Shape 1909	6	3.01
Shape 1910	4	2.23
Shape 1911	3	8.5
Shape 1912	11	2.98
Shape 1913	19	3.96
Shape 1914	16	4.49
Shape 1915	3	1.99
Shape 1916	14	4.87
Shape 1917	10	2.43
Shape 1918	9	6.32
Shape 1919	2	3.54
Shape 1920	11	3.35
Shape 1921	11	2.87
Shape 1922	16	4.27
Shape 1923	10	3.69
Shape 1924	3	2.81
Shape 1925	4	5.24
Shape 1926	12	3.44
Shape 1927	14	5.81
Shape 1928	2	2.13
Shape 1929	2	3.93
Shape 1930	4	2.24
Shape 1931	11	3.62
Shape 1932	16	5.06
Shape 1933	10	3.44
Shape 1934	3	5.49
Shape 1935	10	1.96
Shape 1936	10	4.55
Shape 1937	13	2.86
Shape 1938	18	4.44
Shape 1939	18	3.83
Shape 1940	11	2.25
Shape 1941	16	4.52
Shape 1942	18	2.67
Shape 1943	11	5.18
Shape 1944	10	2.33
Shape 1945	14	3.07
Shape 1946	2	2.52
Shape 1947	10	3.03
Shape 1948	14	4.77
Shape 1949	14	1.07
Shape 1950	6	2.15
Shape 1951	17	4.94
Shape 1952	7	2.23
Shape 1953	3	5.27
Shape 1954	20	6.66
Shape 1955	14	4.33
Shape 1956	6	2.24
Shape 1957	5	3.19
Shape 1958	3	3.37
Shape 1959	19	5.02
Shape 1960	17	5.03
Shape 1961	10	2.65
Shape 1962	7	5.22
Shape 1963	1	3.89
Shape 1964	14	4.09
Shape 1965	1	3.12
Shape 1966	12	3.12
Shape 1967	13	6.47
Shape 1968	12	1.8
Shape 1969	6	2.33
Shape 1970	17	5.14
Shape 1971	4	2.45
Shape 1972	3	5.36
Shape 1973	10	4.79
Shape 1974	11	4.29
Shape 1975	2	2.49
Shape 1976	10	1.48
Shape 1977	9	6.4
Shape 1978	11	3.01
Shape 1979	7	2.36
Shape 1980	17	4.86
Shape 1981	6	2.11
Shape 1982	3	5
Shape 1983	19	2.05
Shape 1984	5	5.64
Shape 1985	18	3.59
Shape 1986	2	3.46
Shape 1987	4	2.55
Shape 1988	12	2.99
Shape 1989	17	5.4
Shape 1990	4	2.24
Shape 1991	3	5.35
Shape 1992	20	7.08
Shape 1993	8	5.61
Shape 1994	14	3.02
Shape 1995	11	5.14
Shape 1996	7	2.05
Shape 1997	9	5.23
Shape 1998	17	5.41
[truncated: 779 more rows]

## Sheet: 3F Con v GoF Shape Modes
		Relative Freq. (%)	Relative Freq. (%)
Shape Mode	Polarization	Con(GoF)	GoF
1	Weakly Polarized	1.51515	0.533333
2	Weakly Polarized	4.31818	3.4
3	Weakly Polarized	3.71212	2.8
4	Weakly Polarized	3.56061	2.06667
5	Weakly Polarized	4.62121	3.4
6	Weakly Polarized	8.10606	0.733333
7	Weakly Polarized	4.39394	2.13333
8	Polarized	5.68182	6.33333
9	Polarized	5.68182	6.6
10	Polarized	1.36364	2.46667
11	Polarized	5.45455	3.26667
12	Polarized	13.7121	7.66667
13	Polarized	7.04545	4.8
14	Polarized	6.43939	5.66667
15	Hyper Polarized	2.87879	13.2667
16	Hyper Polarized	2.19697	4.46667
17	Hyper Polarized	2.87879	5.13333
18	Hyper Polarized	4.16667	7.93333
19	Hyper Polarized	6.9697	8.86667
20	Hyper Polarized	5.30303	8.46667

## Sheet: 3G Con v GoF Shape Modes
	Con(GoF) (%)	GoF (%)
Weakly Polarized	30.2273	15.0667
Polarized	45.3788	36.8
Hyper Polarized	24.3939	48.1333

## Sheet: Control (GoF) 20 Bin 400 Coord
Shape Modes output from VAMPIRE software (Phillip et al 2021) for segmented Control (GoF background) keratinocytes . Column B used for generating frequency graphs in 3F/G.
Filename	Shape mode	Distance from cluster center
Shape 1	4	2.56
Shape 2	19	2.13
Shape 3	5	2.78
Shape 4	19	3.14
Shape 5	5	3.86
Shape 6	20	2.34
Shape 7	19	1.65
Shape 8	14	3.33
Shape 9	14	2
Shape 10	8	2.64
Shape 11	14	1.84
Shape 12	12	1.21
Shape 13	8	2.12
Shape 14	12	2.39
Shape 15	20	2.14
Shape 16	3	4.53
Shape 17	15	3.12
Shape 18	17	5.81
Shape 19	12	1.88
Shape 20	7	6.12
Shape 21	6	2
Shape 22	7	6.42
Shape 23	5	1.91
Shape 24	17	5.63
Shape 25	17	7.28
Shape 26	20	2.84
Shape 27	17	4.17
Shape 28	12	3.53
Shape 29	11	5.48
Shape 30	9	3.54
Shape 31	5	4.69
Shape 32	10	5.91
Shape 33	12	4.06
Shape 34	7	4.66
Shape 35	3	2.58
Shape 36	5	3.13
Shape 37	8	2.51
Shape 38	14	2.15
Shape 39	9	5.23
Shape 40	15	4.5
Shape 41	12	4.89
Shape 42	15	2.38
Shape 43	2	5.56
Shape 44	6	2.91
Shape 45	2	2.03
Shape 46	9	3.07
Shape 47	13	2.53
Shape 48	7	1.93
Shape 49	12	2.06
Shape 50	3	2.3
Shape 51	14	2.19
Shape 52	10	6.57
Shape 53	1	2.47
Shape 54	5	6.09
Shape 55	1	3.34
Shape 56	15	5.74
Shape 57	18	7.26
Shape 58	1	2.9
Shape 59	10	4.68
Shape 60	6	2.7
Shape 61	18	5.38
Shape 62	5	2.22
Shape 63	15	4.74
Shape 64	4	4.87
Shape 65	16	3.5
Shape 66	18	3.97
Shape 67	14	2.26
Shape 68	15	3.76
Shape 69	20	4.94
Shape 70	18	4.13
Shape 71	13	3.07
Shape 72	20	3.44
Shape 73	20	4.94
Shape 74	4	2.46
Shape 75	12	3.4
Shape 76	20	3.44
Shape 77	20	4.66
Shape 78	12	1.67
Shape 79	13	3.13
Shape 80	2	2.51
Shape 81	6	1.18
Shape 82	14	2.21
Shape 83	20	3.47
Shape 84	7	1.41
Shape 85	4	1.95
Shape 86	20	4.66
Shape 87	1	3.48
Shape 88	13	2.11
Shape 89	15	6.92
Shape 90	20	5.11
Shape 91	1	3
Shape 92	13	2.71
Shape 93	20	4.58
Shape 94	20	5.16
Shape 95	6	1.84
Shape 96	13	3.07
Shape 97	14	1.55
Shape 98	13	2.72
Shape 99	20	5.16
Shape 100	11	1.98
Shape 101	8	2.09
Shape 102	20	5.16
Shape 103	14	1.76
Shape 104	12	1.4
Shape 105	14	2.34
Shape 106	9	2.31
Shape 107	14	2.26
Shape 108	12	2.86
Shape 109	12	1.95
Shape 110	7	2.65
Shape 111	12	2.13
Shape 112	9	2.92
Shape 113	12	2.46
Shape 114	9	3.01
Shape 115	13	2.4
Shape 116	18	5.92
Shape 117	13	3.76
Shape 118	9	2.76
Shape 119	20	2.34
Shape 120	14	3.9
Shape 121	11	1.99
Shape 122	9	3.19
Shape 123	16	2.15
Shape 124	16	3.73
Shape 125	12	2.68
Shape 126	13	3.62
Shape 127	3	2.66
Shape 128	15	3.26
Shape 129	3	2.38
Shape 130	14	3.4
Shape 131	5	3.16
Shape 132	11	4.63
Shape 133	14	3.84
Shape 134	2	5.9
Shape 135	12	1.36
Shape 136	4	6.7
Shape 137	1	2.57
Shape 138	16	4.35
Shape 139	7	2.37
Shape 140	12	2.18
Shape 141	7	1.91
Shape 142	14	1.92
Shape 143	10	1.95
Shape 144	12	2.13
Shape 145	5	1.84
Shape 146	9	2.86
Shape 147	10	3.56
Shape 148	9	4.25
Shape 149	15	3.62
Shape 150	6	2.74
Shape 151	18	4.98
Shape 152	6	3.48
Shape 153	18	5.2
Shape 154	6	3.03
Shape 155	2	5.28
Shape 156	6	2.77
Shape 157	2	4.09
Shape 158	1	2.33
Shape 159	4	3.46
Shape 160	14	2.26
Shape 161	17	2.7
Shape 162	5	1.25
Shape 163	13	3.11
Shape 164	16	2.59
Shape 165	13	2.7
Shape 166	6	2.52
Shape 167	18	4.17
Shape 168	10	2.61
Shape 169	12	5.29
Shape 170	6	1.62
Shape 171	13	3.18
Shape 172	1	2.26
Shape 173	13	3.11
Shape 174	6	1.13
Shape 175	13	2.56
Shape 176	3	1.46
Shape 177	19	3.34
Shape 178	6	1.98
Shape 179	2	4.19
Shape 180	6	3.82
Shape 181	16	3.88
Shape 182	6	1.29
Shape 183	16	3.73
Shape 184	3	2.22
Shape 185	12	3.03
Shape 186	6	2.58
Shape 187	16	2.58
Shape 188	8	2.16
Shape 189	16	2.81
Shape 190	7	1.23
Shape 191	13	3.38
Shape 192	1	1.58
Shape 193	13	3.52
Shape 194	6	2.39
Shape 195	13	3.29
Shape 196	14	1.8
Shape 197	16	3.06
Shape 198	4	1.58
Shape 199	15	2.64
Shape 200	4	2.42
Shape 201	15	3.09
Shape 202	7	1.8
Shape 203	19	2.59
Shape 204	1	2.67
Shape 205	19	2.94
Shape 206	12	2.83
Shape 207	19	2.34
Shape 208	12	2.01
Shape 209	19	2.42
Shape 210	14	1.69
Shape 211	19	2.44
Shape 212	2	1.49
Shape 213	19	2.66
Shape 214	6	1.99
Shape 215	19	3.06
Shape 216	6	1.51
Shape 217	19	2.9
Shape 218	6	2.14
Shape 219	19	2.49
Shape 220	7	1.84
Shape 221	19	2.6
Shape 222	9	3.24
Shape 223	19	2.7
Shape 224	6	2.22
Shape 225	19	2.61
Shape 226	6	1.99
Shape 227	14	3.1
Shape 228	6	1.7
Shape 229	20	2.72
Shape 230	6	1.34
Shape 231	20	2.6
Shape 232	7	2.17
Shape 233	13	2.92
Shape 234	6	1.91
Shape 235	13	3.76
Shape 236	6	1.69
Shape 237	13	3.85
Shape 238	6	1.72
Shape 239	13	4.23
Shape 240	7	2.91
Shape 241	9	5.29
Shape 242	6	1.81
Shape 243	17	4.83
Shape 244	6	2.27
Shape 245	5	4.74
Shape 246	4	1.97
Shape 247	5	5.2
Shape 248	6	2.73
Shape 249	17	3.26
Shape 250	6	1.58
Shape 251	17	3.36
Shape 252	6	1.59
Shape 253	13	4.98
Shape 254	10	4.02
Shape 255	18	5.83
Shape 256	6	1.87
Shape 257	18	7.38
Shape 258	6	2.19
Shape 259	2	3.64
Shape 260	6	2.21
Shape 261	2	3.63
Shape 262	7	2.84
Shape 263	9	3.83
Shape 264	6	2.17
Shape 265	2	5.82
Shape 266	6	1.47
Shape 267	9	3.52
Shape 268	6	1.64
Shape 269	9	3.15
Shape 270	6	2.58
Shape 271	9	3.56
Shape 272	6	2.48
Shape 273	9	2.84
Shape 274	11	2
Shape 275	11	2.53
Shape 276	7	1.6
Shape 277	18	2.77
Shape 278	8	2.27
Shape 279	14	3.05
Shape 280	12	1.75
Shape 281	20	2.34
Shape 282	12	2.54
Shape 283	12	2.6
Shape 284	20	2.29
Shape 285	14	1.91
Shape 286	20	2.64
Shape 287	20	3.02
Shape 288	12	2.77
Shape 289	20	2.64
Shape 290	20	3.12
Shape 291	18	3.45
Shape 292	18	3.85
Shape 293	18	3.16
Shape 294	13	2.83
Shape 295	13	2.76
Shape 296	9	2.76
Shape 297	12	2.21
Shape 298	20	2.39
Shape 299	12	2.71
Shape 300	12	3.08
Shape 301	14	2
Shape 302	12	1.7
Shape 303	13	1.92
Shape 304	20	2.12
Shape 305	11	2.52
Shape 306	12	2.01
Shape 307	12	2.45
Shape 308	12	2.63
Shape 309	8	2.59
Shape 310	18	3.06
Shape 311	9	4.04
Shape 312	18	4.08
Shape 313	18	4.48
Shape 314	18	4.78
Shape 315	8	4.55
Shape 316	13	5.83
Shape 317	20	3.83
Shape 318	12	2.84
Shape 319	12	2.56
Shape 320	8	3.3
Shape 321	8	3.11
Shape 322	8	3.1
Shape 323	19	3.86
Shape 324	19	4.14
Shape 325	19	4.12
Shape 326	11	3.73
Shape 327	11	3.37
Shape 328	5	4.88
Shape 329	5	5.81
Shape 330	9	4.86
Shape 331	18	3.99
Shape 332	17	3.4
Shape 333	16	3.31
Shape 334	18	4.89
Shape 335	13	5.02
Shape 336	13	2.65
Shape 337	13	3.32
Shape 338	2	2.08
Shape 339	20	2.18
Shape 340	12	1.91
Shape 341	12	2.49
Shape 342	12	3.2
Shape 343	12	2.48
Shape 344	12	2.25
Shape 345	19	2.6
Shape 346	19	2.6
Shape 347	19	3.68
Shape 348	19	3.27
Shape 349	19	2.55
Shape 350	19	2.76
Shape 351	19	2.69
Shape 352	15	2.51
Shape 353	15	2.91
Shape 354	15	2.82
Shape 355	20	1.67
Shape 356	20	2.5
Shape 357	15	2.11
Shape 358	15	3.07
Shape 359	15	2.95
Shape 360	2	3.37
Shape 361	2	3.12
Shape 362	14	2.79
Shape 363	4	2.58
Shape 364	14	1.94
Shape 365	14	2.33
Shape 366	14	2.55
Shape 367	12	1.83
Shape 368	12	1.95
Shape 369	20	2.31
Shape 370	11	3.5
Shape 371	12	2.27
Shape 372	12	2.13
Shape 373	12	2.36
Shape 374	20	1.76
Shape 375	20	2.8
Shape 376	14	2.84
Shape 377	12	2.24
Shape 378	20	2.29
Shape 379	12	2.1
Shape 380	12	1.7
Shape 381	8	2.2
Shape 382	11	2.84
Shape 383	14	2.97
Shape 384	17	3.21
Shape 385	14	3.28
Shape 386	14	2.25
Shape 387	14	1.69
Shape 388	4	2.73
Shape 389	8	2.21
Shape 390	8	2.38
Shape 391	8	2.15
Shape 392	19	2.89
Shape 393	14	1.74
Shape 394	12	1.75
Shape 395	12	2.39
Shape 396	15	3.61
Shape 397	20	2.06
Shape 398	16	1.96
Shape 399	8	2.35
Shape 400	8	2.77
Shape 401	8	3.11
Shape 402	19	1.81
Shape 403	12	1.98
Shape 404	12	2.82
Shape 405	14	2.19
Shape 406	12	2.14
Shape 407	20	2.09
Shape 408	1	5.04
Shape 409	12	2.05
Shape 410	14	1.86
Shape 411	7	2.43
Shape 412	12	2.64
Shape 413	2	3.13
Shape 414	16	3.64
Shape 415	16	2.66
Shape 416	9	2.89
Shape 417	4	3.58
Shape 418	12	1.98
Shape 419	12	2.53
Shape 420	20	1.99
Shape 421	12	1.31
Shape 422	12	1.93
Shape 423	14	2.15
Shape 424	13	2.3
Shape 425	13	2.27
Shape 426	5	1.69
Shape 427	5	2.13
Shape 428	17	2.3
Shape 429	1	3.9
Shape 430	8	2.9
Shape 431	8	2
Shape 432	12	3.83
Shape 433	12	3.03
Shape 434	12	2.35
Shape 435	12	2.26
Shape 436	12	1.71
Shape 437	11	1.99
Shape 438	12	1.97
Shape 439	20	1.8
Shape 440	12	1.77
Shape 441	12	1.67
Shape 442	12	2.18
Shape 443	12	2.71
Shape 444	19	2.69
Shape 445	18	3.75
Shape 446	19	2.54
Shape 447	12	2.24
Shape 448	12	2.16
Shape 449	12	2.58
Shape 450	19	2.81
Shape 451	12	2.99
Shape 452	12	2.97
Shape 453	19	3.6
Shape 454	19	2.98
Shape 455	19	2.72
Shape 456	12	2.8
Shape 457	12	2.97
Shape 458	14	3.42
Shape 459	20	4.04
Shape 460	12	3.54
Shape 461	2	2.52
Shape 462	2	2.67
Shape 463	2	2.88
Shape 464	20	2.82
Shape 465	12	2.58
Shape 466	8	1.93
Shape 467	12	1.73
Shape 468	9	2.26
Shape 469	8	1.85
Shape 470	8	1.84
Shape 471	14	1.9
Shape 472	11	3.98
Shape 473	19	3.13
Shape 474	11	3.37
Shape 475	19	2.99
Shape 476	11	3.36
Shape 477	19	4.18
Shape 478	19	3.29
Shape 479	19	2.98
Shape 480	19	3.09
Shape 481	19	3.63
Shape 482	13	2.87
Shape 483	13	3.27
Shape 484	13	2.73
Shape 485	13	3.04
Shape 486	13	3.67
Shape 487	2	3.7
Shape 488	12	4.11
Shape 489	7	3.59
Shape 490	7	3.58
Shape 491	20	3.26
Shape 492	4	2.23
Shape 493	5	1.94
Shape 494	4	1.92
Shape 495	12	1.5
Shape 496	12	1.62
Shape 497	12	2.93
Shape 498	12	2.6
Shape 499	12	2.09
Shape 500	12	2.09
Shape 501	12	2.02
Shape 502	12	2.11
Shape 503	12	2.28
Shape 504	12	2.22
Shape 505	12	2.23
Shape 506	12	2.13
Shape 507	14	2.42
Shape 508	12	2.31
Shape 509	14	2.42
Shape 510	12	1.63
Shape 511	20	2.24
Shape 512	12	2.43
Shape 513	12	2.91
Shape 514	20	2.38
Shape 515	12	2.33
Shape 516	20	2.64
Shape 517	20	2.75
Shape 518	12	2.42
Shape 519	19	2.57
Shape 520	19	2.67
Shape 521	19	2.66
Shape 522	19	2.99
Shape 523	19	2.87
Shape 524	19	2.14
Shape 525	19	2.64
Shape 526	8	3.12
Shape 527	8	3.39
Shape 528	8	3.51
Shape 529	8	2.88
Shape 530	20	2.35
Shape 531	15	2.71
Shape 532	6	3.91
Shape 533	6	3.91
Shape 534	2	2.89
Shape 535	2	2.89
Shape 536	7	2.61
Shape 537	7	2.81
Shape 538	7	2.71
Shape 539	5	3.22
Shape 540	4	3.14
Shape 541	5	3.09
Shape 542	5	3.48
Shape 543	18	2.97
Shape 544	18	3.24
Shape 545	18	3.25
Shape 546	18	3.19
Shape 547	18	3.53
Shape 548	18	3.53
Shape 549	18	3.72
Shape 550	9	3.92
Shape 551	6	4.35
Shape 552	2	4.06
Shape 553	9	4.08
Shape 554	2	3.66
Shape 555	2	3.7
Shape 556	2	3.91
Shape 557	2	3.33
Shape 558	2	2.88
Shape 559	2	2.91
Shape 560	14	3
Shape 561	14	2.72
Shape 562	14	2.94
Shape 563	14	2.85
Shape 564	14	2.71
Shape 565	14	1.74
Shape 566	11	2
Shape 567	11	1.66
Shape 568	19	1.69
Shape 569	11	1.6
Shape 570	13	1.92
Shape 571	13	1.65
Shape 572	13	1.83
Shape 573	13	1.95
Shape 574	13	1.8
Shape 575	13	1.52
Shape 576	15	2.76
Shape 577	13	1.59
Shape 578	13	1.74
Shape 579	13	1.9
Shape 580	13	1.88
Shape 581	13	1.66
Shape 582	3	1.77
Shape 583	3	1.88
Shape 584	13	1.66
Shape 585	5	1.88
Shape 586	5	1.9
Shape 587	3	2.04
Shape 588	5	1.88
Shape 589	5	1.91
Shape 590	5	2.36
Shape 591	5	2.27
Shape 592	18	2.55
Shape 593	16	2.07
Shape 594	18	2.07
Shape 595	13	1.76
Shape 596	17	1.65
Shape 597	17	3.09
Shape 598	17	3.51
Shape 599	13	3.88
Shape 600	13	4.12
Shape 601	17	2.96
Shape 602	17	3.14
Shape 603	17	3.33
Shape 604	17	3.42
Shape 605	5	4.57
Shape 606	5	4.7
Shape 607	9	3.87
Shape 608	3	4.36
Shape 609	10	5.52
Shape 610	3	3.78
Shape 611	9	3.54
Shape 612	13	3.26
Shape 613	13	4.38
Shape 614	13	3.97
Shape 615	13	4.07
Shape 616	13	4.15
Shape 617	17	4.15
Shape 618	19	3.79
Shape 619	19	3.67
Shape 620	19	3.91
Shape 621	19	3.65
Shape 622	19	3.41
Shape 623	19	3.56
Shape 624	19	3.62
Shape 625	19	3.16
Shape 626	19	3.92
Shape 627	19	3.63
Shape 628	19	3.74
Shape 629	19	4.21
Shape 630	19	3.85
Shape 631	19	4.31
Shape 632	19	4.22
Shape 633	19	5.29
Shape 634	19	4.21
Shape 635	19	3.9
Shape 636	19	4.07
Shape 637	19	4.37
Shape 638	13	4.12
Shape 639	16	3.35
Shape 640	19	4.13
Shape 641	19	4.41
Shape 642	11	2.59
Shape 643	13	2.97
Shape 644	8	5.71
Shape 645	19	2.71
Shape 646	11	3.06
Shape 647	2	2.52
Shape 648	2	3.2
Shape 649	8	2.95
Shape 650	20	6.82
Shape 651	2	2.23
Shape 652	11	2.34
Shape 653	2	2.82
Shape 654	17	2.46
Shape 655	13	2.52
Shape 656	13	2.09
Shape 657	13	2.23
Shape 658	9	2.05
Shape 659	13	3.13
Shape 660	13	2.25
Shape 661	13	2.26
Shape 662	13	1.87
Shape 663	13	2.22
Shape 664	13	1.99
Shape 665	3	2.52
Shape 666	4	1.86
Shape 667	7	4.02
Shape 668	6	2.19
Shape 669	6	1.99
Shape 670	6	2.88
Shape 671	6	2.11
Shape 672	6	1.6
Shape 673	6	1.81
Shape 674	3	2.29
Shape 675	7	2.5
Shape 676	6	2.46
Shape 677	6	2.06
Shape 678	7	1.72
Shape 679	7	1.72
Shape 680	11	1.65
Shape 681	11	1.77
Shape 682	11	1.77
Shape 683	4	1.8
Shape 684	4	1.64
Shape 685	13	1.88
Shape 686	13	2.08
Shape 687	18	2.21
Shape 688	5	2.34
Shape 689	16	2.26
Shape 690	9	2.51
Shape 691	5	2.61
Shape 692	5	2.37
Shape 693	15	3.82
Shape 694	5	2.9
Shape 695	10	2.27
Shape 696	6	2.89
Shape 697	5	3.04
Shape 698	16	2
Shape 699	6	2.23
Shape 700	1	3.89
Shape 701	6	1.87
Shape 702	7	3.01
Shape 703	7	3.4
Shape 704	14	2.33
Shape 705	3	1.83
Shape 706	7	2.3
Shape 707	3	1.87
Shape 708	3	2.29
Shape 709	7	1.54
Shape 710	10	2.32
Shape 711	12	6.21
Shape 712	7	2.11
Shape 713	7	1.56
Shape 714	12	2.46
Shape 715	5	3.19
Shape 716	3	1.65
Shape 717	9	4.77
Shape 718	20	6.21
Shape 719	11	4.06
Shape 720	20	4.05
Shape 721	11	1.79
Shape 722	11	2.28
Shape 723	4	2.63
Shape 724	6	1.91
Shape 725	2	2.36
Shape 726	6	1.85
Shape 727	6	1.68
Shape 728	6	2.1
Shape 729	6	1.93
Shape 730	6	1.61
Shape 731	6	1.73
Shape 732	6	1.58
Shape 733	6	1.94
Shape 734	6	1.79
Shape 735	6	1.75
Shape 736	6	1.92
Shape 737	6	1.87
Shape 738	6	1.61
Shape 739	13	5.08
Shape 740	19	2.59
Shape 741	11	1.76
Shape 742	12	2.02
Shape 743	19	2.03
Shape 744	8	2.09
Shape 745	12	2.02
Shape 746	8	2.57
Shape 747	19	2.42
Shape 748	12	2.24
Shape 749	9	2.44
Shape 750	11	3.25
Shape 751	11	2.17
Shape 752	18	2.54
Shape 753	2	2.16
Shape 754	6	2.33
Shape 755	1	3.08
Shape 756	2	4.42
Shape 757	12	3.35
Shape 758	11	5.56
Shape 759	14	4.92
Shape 760	5	3.78
Shape 761	9	2.54
Shape 762	19	3.38
Shape 763	19	3.84
Shape 764	19	5
Shape 765	19	3.01
Shape 766	12	1.83
Shape 767	19	3.09
Shape 768	8	2.55
Shape 769	20	2.41
Shape 770	8	2.59
Shape 771	19	2.74
Shape 772	8	2.6
Shape 773	11	4.75
Shape 774	2	4.91
Shape 775	8	4.64
Shape 776	8	3.55
Shape 777	12	3.76
Shape 778	8	4.09
Shape 779	20	4.09
Shape 780	16	3.47
Shape 781	19	3.91
Shape 782	9	5.79
Shape 783	18	6.6
Shape 784	3	4.31
Shape 785	18	6.74
Shape 786	7	2.97
Shape 787	7	7.06
Shape 788	8	2.21
Shape 789	14	3.07
Shape 790	8	2.59
Shape 791	19	2.88
Shape 792	11	2.84
Shape 793	12	2.58
Shape 794	14	3.01
Shape 795	6	2.91
Shape 796	8	2.93
Shape 797	8	3.55
Shape 798	8	2.58
Shape 799	8	3.12
Shape 800	8	3.13
Shape 801	12	2.64
Shape 802	20	2.77
Shape 803	12	1.9
Shape 804	12	2.72
Shape 805	8	2.56
Shape 806	8	2.96
Shape 807	8	3.13
Shape 808	18	4.1
Shape 809	9	4.32
Shape 810	9	4.34
Shape 811	16	3.97
Shape 812	11	2.24
Shape 813	11	1.79
Shape 814	7	1.54
Shape 815	5	3.17
Shape 816	7	2.72
Shape 817	10	2.47
Shape 818	5	2.58
Shape 819	3	2.79
Shape 820	8	2.4
Shape 821	8	1.63
Shape 822	8	1.49
Shape 823	8	2.22
Shape 824	14	2.64
Shape 825	14	2.75
Shape 826	14	2.7
Shape 827	19	2.45
Shape 828	20	2.95
Shape 829	20	2.7
Shape 830	12	2.52
Shape 831	12	2.39
Shape 832	12	2.39
Shape 833	8	2.64
Shape 834	19	2.72
Shape 835	19	3.46
Shape 836	12	3.6
Shape 837	12	3.26
Shape 838	12	3.42
Shape 839	20	3.64
Shape 840	20	3.39
Shape 841	20	4.66
Shape 842	9	4.35
Shape 843	9	4.85
Shape 844	17	5.35
Shape 845	17	5.62
Shape 846	4	3.71
Shape 847	14	3.19
Shape 848	9	4.22
Shape 849	19	1.99
Shape 850	14	2.88
Shape 851	14	3.66
Shape 852	19	3.37
Shape 853	14	3.84
Shape 854	14	3.13
Shape 855	14	3.09
Shape 856	14	3.17
Shape 857	20	3.64
Shape 858	20	3.33
Shape 859	20	3.13
Shape 860	20	2.82
Shape 861	12	3.51
Shape 862	12	2.98
Shape 863	15	3.94
Shape 864	15	3.28
Shape 865	12	3.76
Shape 866	12	3.6
Shape 867	12	5.05
Shape 868	12	5.31
Shape 869	20	5
Shape 870	20	6.12
Shape 871	18	7.04
Shape 872	18	4.87
Shape 873	18	5.48
Shape 874	15	3.4
Shape 875	15	2.81
Shape 876	20	3.36
Shape 877	5	3.61
Shape 878	9	1.94
Shape 879	7	3.86
Shape 880	14	4.89
Shape 881	9	6.4
Shape 882	6	3.35
Shape 883	6	2.88
Shape 884	2	3.72
Shape 885	18	3.12
Shape 886	2	4.24
Shape 887	8	3.76
Shape 888	12	4.11
Shape 889	12	3.52
Shape 890	12	3.13
Shape 891	11	3.59
Shape 892	8	2.5
Shape 893	12	3.26
Shape 894	12	3.3
Shape 895	12	2.49
Shape 896	8	3.62
Shape 897	12	3.37
Shape 898	12	3.91
Shape 899	12	3.51
Shape 900	20	4.05
Shape 901	15	4.97
Shape 902	15	4.05
Shape 903	18	3.8
Shape 904	18	4.21
Shape 905	14	4.32
Shape 906	14	3.77
Shape 907	14	4.08
Shape 908	12	5.21
Shape 909	12	3.51
Shape 910	15	3.35
Shape 911	15	3.99
Shape 912	15	3.81
Shape 913	15	4.71
Shape 914	17	4.24
Shape 915	16	3.59
Shape 916	17	4.33
Shape 917	10	4.9
Shape 918	9	4.38
Shape 919	9	3.72
Shape 920	14	3.86
Shape 921	15	3.1
Shape 922	15	3.45
Shape 923	15	3.63
Shape 924	14	3.15
Shape 925	8	3.75
Shape 926	8	3.33
Shape 927	9	3.28
Shape 928	9	4.21
Shape 929	9	3.27
Shape 930	15	2.7
Shape 931	15	4.26
Shape 932	15	3.41
Shape 933	18	5.01
Shape 934	15	3.96
Shape 935	7	4.46
Shape 936	18	3.74
Shape 937	8	4.1
Shape 938	8	3.6
Shape 939	5	3.71
Shape 940	12	1.89
Shape 941	3	3.12
Shape 942	4	3.2
Shape 943	12	2.72
Shape 944	19	2.81
Shape 945	9	2.85
Shape 946	5	3.12
Shape 947	7	2.71
Shape 948	4	3.94
Shape 949	2	1.87
Shape 950	13	3.99
Shape 951	8	2.19
Shape 952	4	4.45
Shape 953	8	1.96
Shape 954	14	2.66
Shape 955	8	2.42
Shape 956	5	2.66
Shape 957	12	4.4
Shape 958	18	3.26
Shape 959	7	3.01
Shape 960	12	2.91
Shape 961	7	3.81
Shape 962	2	2.55
Shape 963	4	4.28
Shape 964	3	2.08
Shape 965	11	4.16
Shape 966	17	2.06
Shape 967	11	5.03
Shape 968	11	1.92
Shape 969	13	3.76
Shape 970	3	1.99
Shape 971	13	3.48
Shape 972	13	2.14
Shape 973	13	3.48
Shape 974	9	2.17
Shape 975	9	2.96
Shape 976	9	2.67
Shape 977	5	3.47
Shape 978	14	2.37
Shape 979	3	3.76
Shape 980	14	1.86
Shape 981	2	2.46
Shape 982	4	1.74
Shape 983	11	2.08
Shape 984	12	1.27
Shape 985	11	2.38
Shape 986	5	1.68
Shape 987	8	2.24
Shape 988	5	2.51
Shape 989	12	3.44
Shape 990	2	3
Shape 991	12	2.01
Shape 992	12	1.91
Shape 993	12	2.21
Shape 994	6	1.94
Shape 995	12	2.37
Shape 996	4	1.74
Shape 997	12	3.01
Shape 998	4	2.5
Shape 999	12	2.78
Shape 1000	4	2.94
Shape 1001	8	2.49
Shape 1002	4	2.55
Shape 1003	8	3.02
Shape 1004	4	2.27
Shape 1005	12	3.29
Shape 1006	4	2.32
Shape 1007	12	3.28
Shape 1008	4	3.59
Shape 1009	9	3.55
Shape 1010	5	2.11
Shape 1011	4	4.01
Shape 1012	9	1.87
Shape 1013	11	4.34
Shape 1014	17	2.71
Shape 1015	16	3.06
Shape 1016	11	2.21
Shape 1017	16	3.37
Shape 1018	6	2.69
Shape 1019	16	2.96
Shape 1020	6	2.89
Shape 1021	16	3.47
Shape 1022	7	2.31
Shape 1023	11	2.86
Shape 1024	6	2.39
Shape 1025	18	2.61
Shape 1026	11	2.08
Shape 1027	18	3.61
Shape 1028	11	2.35
Shape 1029	18	3.42
Shape 1030	11	2.38
Shape 1031	12	3.26
Shape 1032	5	2.46
Shape 1033	12	2.71
Shape 1034	5	2.44
Shape 1035	8	2.52
Shape 1036	5	2.87
Shape 1037	8	3.07
Shape 1038	7	2.83
Shape 1039	4	2.96
Shape 1040	17	2.48
Shape 1041	12	2.71
Shape 1042	17	3.33
Shape 1043	10	2.66
Shape 1044	13	2.57
Shape 1045	1	3.94
Shape 1046	17	2.65
Shape 1047	16	4.73
Shape 1048	18	1.75
Shape 1049	7	2.26
Shape 1050	8	1.68
Shape 1051	13	3.33
Shape 1052	9	2.39
Shape 1053	11	2.75
Shape 1054	9	2.63
Shape 1055	11	2.74
Shape 1056	18	3.96
Shape 1057	13	2.07
Shape 1058	9	3.17
Shape 1059	3	2.09
Shape 1060	4	4.02
Shape 1061	9	1.9
Shape 1062	5	2.67
Shape 1063	9	2.1
Shape 1064	2	2.02
Shape 1065	17	2.04
Shape 1066	12	2.7
Shape 1067	6	2.56
Shape 1068	12	2.61
Shape 1069	2	1.42
Shape 1070	20	3.54
Shape 1071	4	1.24
Shape 1072	12	3.21
Shape 1073	3	1.83
Shape 1074	14	3.27
Shape 1075	2	2.13
Shape 1076	20	2.66
Shape 1077	2	1.61
Shape 1078	3	2.73
Shape 1079	12	1.73
Shape 1080	18	2.54
Shape 1081	8	2.05
Shape 1082	9	3.67
Shape 1083	12	2.83
Shape 1084	3	1.4
Shape 1085	12	2.9
Shape 1086	11	1.93
Shape 1087	12	2.57
Shape 1088	11	2.67
Shape 1089	12	1.91
Shape 1090	3	2.73
Shape 1091	12	1.73
Shape 1092	4	3.81
Shape 1093	9	2.18
Shape 1094	6	2.34
Shape 1095	9	2.08
Shape 1096	6	2.19
Shape 1097	17	2.1
Shape 1098	11	3.22
Shape 1099	16	3.77
Shape 1100	4	3.82
Shape 1101	18	3.76
Shape 1102	3	3.28
Shape 1103	7	3.65
Shape 1104	7	2.64
Shape 1105	7	1.57
Shape 1106	7	4.11
Shape 1107	12	2.07
Shape 1108	7	2.79
Shape 1109	12	2.46
Shape 1110	7	2.14
Shape 1111	12	1.84
Shape 1112	7	4.05
Shape 1113	14	2.02
Shape 1114	10	6.23
Shape 1115	14	1.79
Shape 1116	9	5.81
Shape 1117	11	2.26
Shape 1118	4	4.9
Shape 1119	12	1.71
Shape 1120	18	4.54
Shape 1121	3	2.4
Shape 1122	9	3.11
Shape 1123	13	2.89
Shape 1124	7	2.85
Shape 1125	13	2.88
Shape 1126	13	2.77
Shape 1127	5	3.7
Shape 1128	13	2.59
Shape 1129	3	3.7
Shape 1130	13	2.12
Shape 1131	3	2.58
Shape 1132	13	2.19
Shape 1133	13	2.12
Shape 1134	3	2.36
Shape 1135	12	2.51
Shape 1136	17	2.69
Shape 1137	14	2.24
Shape 1138	13	2.74
Shape 1139	14	2.05
Shape 1140	13	1.6
Shape 1141	6	2.16
Shape 1142	3	2.22
Shape 1143	6	3.07
Shape 1144	3	2.94
Shape 1145	6	1.89
Shape 1146	2	3.08
Shape 1147	6	1.91
Shape 1148	2	5.73
Shape 1149	4	2.75
Shape 1150	11	3.61
Shape 1151	11	2.51
Shape 1152	11	3.03
Shape 1153	11	2
Shape 1154	7	2.9
Shape 1155	14	1.64
Shape 1156	5	3.75
Shape 1157	14	2.23
Shape 1158	5	3.03
Shape 1159	14	2.35
Shape 1160	2	5.64
Shape 1161	14	3.12
Shape 1162	14	3.63
Shape 1163	14	3.17
Shape 1164	3	3.18
Shape 1165	20	3.05
Shape 1166	10	4.55
Shape 1167	9	3.05
Shape 1168	3	1.59
Shape 1169	9	3.33
Shape 1170	10	4.09
Shape 1171	16	3.12
Shape 1172	8	2.09
Shape 1173	18	4.3
Shape 1174	9	2.78
Shape 1175	13	3.44
Shape 1176	9	3.15
Shape 1177	2	3.04
Shape 1178	16	2.92
Shape 1179	11	2.03
Shape 1180	9	2.3
Shape 1181	12	2.08
Shape 1182	9	3.53
Shape 1183	3	1.94
Shape 1184	18	2.81
Shape 1185	8	2.12
Shape 1186	13	2.78
Shape 1187	5	2.7
Shape 1188	3	2.33
Shape 1189	14	2
Shape 1190	6	2.95
Shape 1191	12	2.27
Shape 1192	1	2.94
Shape 1193	14	1.82
Shape 1194	9	3
Shape 1195	5	2.51
Shape 1196	1	3.17
Shape 1197	5	2.17
Shape 1198	4	2.42
Shape 1199	9	2.85
Shape 1200	11	2.11
Shape 1201	5	2.77
Shape 1202	20	2.02
Shape 1203	1	2.4
Shape 1204	11	3.41
Shape 1205	6	2.7
Shape 1206	12	2.36
Shape 1207	7	2.48
Shape 1208	19	2.46
Shape 1209	9	3.52
Shape 1210	11	2.86
Shape 1211	2	2.88
Shape 1212	17	3.58
Shape 1213	5	1.74
Shape 1214	19	2.07
Shape 1215	4	2.16
Shape 1216	14	2.16
Shape 1217	6	2.14
Shape 1218	20	2.28
Shape 1219	4	1.43
Shape 1220	3	2.44
Shape 1221	4	1.52
Shape 1222	12	2.6
Shape 1223	3	1.81
Shape 1224	12	2.05
Shape 1225	11	1.83
Shape 1226	12	2.42
Shape 1227	11	1.67
Shape 1228	14	3.35
Shape 1229	11	1.74
Shape 1230	17	4.46
Shape 1231	11	1.91
Shape 1232	13	3.25
Shape 1233	3	2.21
Shape 1234	9	3.45
Shape 1235	17	1.96
Shape 1236	17	3.23
Shape 1237	3	2.6
Shape 1238	8	2.66
Shape 1239	6	2.13
Shape 1240	12	1.87
Shape 1241	6	1.73
Shape 1242	18	4.35
Shape 1243	6	1.79
Shape 1244	10	3.26
Shape 1245	7	2.64
Shape 1246	9	3.28
Shape 1247	6	2.2
Shape 1248	5	3.62
Shape 1249	6	2.77
Shape 1250	13	4.75
Shape 1251	6	2.87
Shape 1252	2	4.14
Shape 1253	6	2.84
Shape 1254	11	3.76
Shape 1255	6	2.81
Shape 1256	3	5.82
Shape 1257	6	1.94
Shape 1258	10	4.73
Shape 1259	5	2.27
Shape 1260	17	7.23
Shape 1261	2	1.78
Shape 1262	4	2.81
Shape 1263	8	2.88
Shape 1264	5	3.13
Shape 1265	11	2.56
Shape 1266	17	3.52
Shape 1267	11	2.27
Shape 1268	7	3.37
Shape 1269	5	2.5
Shape 1270	6	2.41
Shape 1271	4	2.77
Shape 1272	11	2.89
Shape 1273	6	2.46
Shape 1274	2	3.95
Shape 1275	6	2.83
Shape 1276	12	2.26
Shape 1277	6	2.72
Shape 1278	11	3.01
Shape 1279	6	2.58
Shape 1280	3	3.76
Shape 1281	7	2.19
Shape 1282	3	4.08
Shape 1283	3	1.95
Shape 1284	14	4.51
Shape 1285	6	1.74
Shape 1286	2	4.53
Shape 1287	11	1.26
Shape 1288	8	4.41
Shape 1289	12	1.61
Shape 1290	8	2.26
Shape 1291	12	1.94
Shape 1292	12	2.83
Shape 1293	14	2.69
Shape 1294	2	4.53
Shape 1295	6	1.89
Shape 1296	13	3.72
Shape 1297	6	1.89
Shape 1298	19	3.46
Shape 1299	6	1.92
Shape 1300	12	2.54
Shape 1301	6	1.97
Shape 1302	11	2.3
Shape 1303	6	1.57
Shape 1304	1	2.05
Shape 1305	1	2.05
Shape 1306	2	1.33
Shape 1307	3	1.58
Shape 1308	9	1.64
Shape 1309	9	1.79
Shape 1310	4	2.03
Shape 1311	12	1.63
Shape 1312	12	1.86
Shape 1313	12	2.28
Shape 1314	12	2.28
Shape 1315	12	2.49
Shape 1316	7	2.47
Shape 1317	9	2.44
Shape 1318	7	2.78
Shape 1319	6	3.59
Shape 1320	9	3.5

## Sheet: GoF 20 Bin 400 Coord
Shape Modes output from VAMPIRE software (Phillip et al 2021) for segmented GoF keratinocytes . Column B used for generating frequency graphs in 3F/G.
Filename	Shape mode	Distance from cluster center
Shape 1	15	3
Shape 2	1	8.13
Shape 3	15	2.97
Shape 4	1	9.01
Shape 5	15	3.14
Shape 6	1	9.37
Shape 7	15	2.95
Shape 8	7	14.26
Shape 9	15	3.7
Shape 10	7	12
Shape 11	15	3.89
Shape 12	2	9.56
Shape 13	15	4.56
Shape 14	7	11.32
Shape 15	15	4.22
Shape 16	12	6.76
Shape 17	15	3.77
Shape 18	9	9.18
Shape 19	3	1.73
Shape 20	7	12.56
Shape 21	14	3.52
Shape 22	7	9.52
Shape 23	4	2.55
Shape 24	7	9.06
Shape 25	16	3.7
Shape 26	9	8.67
Shape 27	9	3.94
Shape 28	2	9.43
Shape 29	16	3.85
Shape 30	9	7.2
Shape 31	4	5.5
Shape 32	17	6.18
Shape 33	7	8.34
Shape 34	19	2.38
Shape 35	7	8.32
Shape 36	16	3.25
Shape 37	7	7.96
Shape 38	5	4.27
Shape 39	7	8.31
Shape 40	16	2.68
Shape 41	18	8.49
Shape 42	16	2.43
Shape 43	18	8.71
Shape 44	16	3.52
Shape 45	18	8.59
Shape 46	16	2.49
Shape 47	18	8.51
Shape 48	2	2.87
Shape 49	2	9.1
Shape 50	3	3.55
Shape 51	18	8.73
Shape 52	18	2.75
Shape 53	18	9.11
Shape 54	1	5.53
Shape 55	18	9.32
Shape 56	1	5.89
Shape 57	18	9.28
Shape 58	18	4.33
Shape 59	18	9.37
Shape 60	9	3.91
Shape 61	18	8.7
Shape 62	4	5.93
Shape 63	18	9.34
Shape 64	17	5.98
Shape 65	18	9.56
Shape 66	5	6.37
Shape 67	7	7.99
Shape 68	8	6.24
Shape 69	4	11.96
Shape 70	12	4.25
Shape 71	3	7.78
Shape 72	9	3.83
Shape 73	18	10.54
Shape 74	15	2.84
Shape 75	18	9.9
Shape 76	15	3.7
Shape 77	18	10.28
Shape 78	15	3.95
Shape 79	18	9.4
Shape 80	15	3.67
Shape 81	20	5.14
Shape 82	18	9.64
Shape 83	15	3.05
Shape 84	20	4.8
Shape 85	18	10.45
Shape 86	15	3.81
Shape 87	18	7.43
Shape 88	15	3.79
Shape 89	18	8.02
Shape 90	15	2.15
Shape 91	18	7.94
Shape 92	11	3.42
Shape 93	10	7.49
Shape 94	19	3.01
Shape 95	10	7.25
Shape 96	15	2.86
Shape 97	11	6.85
Shape 98	15	3.72
Shape 99	18	6.21
Shape 100	15	4.57
Shape 101	18	5.91
Shape 102	15	4.54
Shape 103	18	5.92
Shape 104	15	4.54
Shape 105	18	5.97
Shape 106	15	3.24
Shape 107	18	6.55
Shape 108	15	4.32
Shape 109	18	6.67
Shape 110	15	4.68
Shape 111	18	6.75
Shape 112	15	5.89
Shape 113	18	6.82
Shape 114	15	5.14
Shape 115	18	7.58
Shape 116	15	5.39
Shape 117	18	7.1
Shape 118	15	5.25
Shape 119	18	6.78
Shape 120	15	5.73
Shape 121	18	6.78
Shape 122	15	4.2
Shape 123	18	6.48
Shape 124	15	4.61
Shape 125	18	5.96
Shape 126	15	4.41
Shape 127	18	6.76
Shape 128	20	4.21
Shape 129	10	6.77
Shape 130	3	4.9
Shape 131	10	7.41
Shape 132	16	4.21
Shape 133	10	7.2
Shape 134	5	3.86
Shape 135	18	6.65
Shape 136	12	2.88
Shape 137	18	6.47
Shape 138	19	3.49
Shape 139	18	6.86
Shape 140	11	5
Shape 141	18	6.52
Shape 142	13	4.08
Shape 143	18	6.72
Shape 144	12	4.1
Shape 145	18	5.59
Shape 146	13	2.89
Shape 147	18	6.64
Shape 148	19	3.43
Shape 149	18	6.92
Shape 150	14	2.79
Shape 151	18	6.82
Shape 152	14	3.38
Shape 153	10	6.98
Shape 154	11	3.88
Shape 155	18	7.34
Shape 156	15	3.71
Shape 157	20	6.54
Shape 158	15	3.77
Shape 159	20	6.58
Shape 160	4	4
Shape 161	18	6.88
Shape 162	14	2.34
Shape 163	18	7.32
Shape 164	8	2.06
Shape 165	12	4.65
Shape 166	13	1.78
Shape 167	4	3.96
Shape 168	20	7.34
Shape 169	16	3.62
Shape 170	1	6.86
Shape 171	18	6.58
Shape 172	2	4.46
Shape 173	18	5.47
Shape 174	16	2.44
Shape 175	18	4.55
Shape 176	8	2.51
Shape 177	18	7.1
Shape 178	8	2.82
Shape 179	10	7.35
Shape 180	20	1.84
Shape 181	18	6.62
Shape 182	14	3.67
Shape 183	18	6.37
Shape 184	9	2.92
Shape 185	18	7.38
Shape 186	3	2.46
Shape 187	10	6.84
Shape 188	8	2.48
Shape 189	18	7.02
Shape 190	8	2.36
Shape 191	10	7.48
Shape 192	19	3.06
Shape 193	10	5.98
Shape 194	8	2.08
Shape 195	19	3.03
Shape 196	18	6.99
Shape 197	19	2.56
Shape 198	10	7.85
Shape 199	13	2.39
Shape 200	18	7.65
Shape 201	16	2.75
Shape 202	18	8.24
Shape 203	16	2.58
Shape 204	10	8.29
Shape 205	16	1.87
Shape 206	18	8.66
Shape 207	17	3.06
Shape 208	15	3.75
Shape 209	18	8.85
Shape 210	11	3.01
Shape 211	10	8.89
Shape 212	19	3.21
Shape 213	18	8.68
Shape 214	8	2.91
Shape 215	10	7.47
Shape 216	15	2.54
Shape 217	10	7.59
Shape 218	8	2.37
Shape 219	9	6.63
Shape 220	13	2.77
Shape 221	18	7.85
Shape 222	19	2.11
Shape 223	9	7.64
Shape 224	15	2.67
Shape 225	9	7.41
Shape 226	2	2.19
Shape 227	9	8.41
Shape 228	13	2.23
Shape 229	9	8.17
Shape 230	3	3.75
Shape 231	10	7.92
Shape 232	12	3.18
Shape 233	10	8.01
Shape 234	16	4.69
Shape 235	10	7.78
Shape 236	17	4.82
Shape 237	9	7.02
Shape 238	19	2.42
Shape 239	12	6.24
Shape 240	13	2.13
Shape 241	12	6.21
Shape 242	19	2.67
Shape 243	12	6.25
Shape 244	15	3.3
Shape 245	12	6.35
Shape 246	10	4.81
Shape 247	7	5.97
Shape 248	5	3.83
Shape 249	12	6.8
Shape 250	8	2.03
Shape 251	13	7.57
Shape 252	19	4.04
Shape 253	3	6.72
Shape 254	19	4.34
Shape 255	3	6.63
Shape 256	15	3.35
Shape 257	20	5.76
Shape 258	3	6.81
Shape 259	15	2.89
Shape 260	3	6.21
Shape 261	15	2.65
Shape 262	17	5.84
Shape 263	15	3.05
Shape 264	4	4.15
Shape 265	17	5.55
Shape 266	15	3.26
Shape 267	17	5.59
Shape 268	11	6.01
Shape 269	19	2.92
Shape 270	19	3.06
Shape 271	12	2.72
Shape 272	11	2.62
Shape 273	9	3.22
Shape 274	16	4.48
Shape 275	13	5.9
Shape 276	16	6.85
Shape 277	11	4.06
Shape 278	12	3.3
Shape 279	18	3.56
Shape 280	9	4.07
Shape 281	10	4.24
Shape 282	17	4.93
Shape 283	17	4.94
Shape 284	13	5.96
Shape 285	13	6.2
Shape 286	19	5.47
Shape 287	13	7.25
Shape 288	18	8.9
Shape 289	3	9.07
Shape 290	15	11.12
Shape 291	12	8.94
Shape 292	9	7.74
Shape 293	9	8.74
Shape 294	12	10.15
Shape 295	12	9.53
Shape 296	7	10.71
Shape 297	7	11.85
Shape 298	4	9.71
Shape 299	13	7.07
Shape 300	15	11.15
Shape 301	7	7.22
Shape 302	3	8.95
Shape 303	2	7.53
Shape 304	2	6.67
Shape 305	8	7.23
Shape 306	8	5.98
Shape 307	8	4.91
Shape 308	8	4
Shape 309	9	5.5
Shape 310	9	6.04
Shape 311	7	5.86
Shape 312	11	6.55
Shape 313	14	5.01
Shape 314	14	5.12
Shape 315	14	5.29
Shape 316	2	6.16
Shape 317	14	6.6
Shape 318	19	4.33
Shape 319	15	6.98
Shape 320	11	5.86
Shape 321	10	6.06
Shape 322	10	6.67
Shape 323	4	4.87
Shape 324	17	6.59
Shape 325	17	7.69
Shape 326	4	6.62
Shape 327	18	5.79
Shape 328	11	5.24
Shape 329	11	5.78
Shape 330	2	7.51
Shape 331	19	6.91
Shape 332	20	4.66
Shape 333	19	4.09
Shape 334	19	4.49
Shape 335	8	4.71
Shape 336	3	4.55
Shape 337	11	5.54
Shape 338	18	4.31
Shape 339	14	4.81
Shape 340	10	5.46
Shape 341	9	6.21
Shape 342	3	8.32
Shape 343	10	5.96
Shape 344	17	7.58
Shape 345	9	5.24
Shape 346	2	8.28
Shape 347	5	7.32
Shape 348	17	7.17
Shape 349	9	5.3
Shape 350	17	5.86
Shape 351	5	6.44
Shape 352	18	5.81
Shape 353	2	7.33
Shape 354	14	8.03
Shape 355	5	9.07
Shape 356	11	7.65
Shape 357	7	8.01
Shape 358	2	7.77
Shape 359	17	6.24
Shape 360	5	6.35
Shape 361	1	7.04
Shape 362	2	10.08
Shape 363	2	10.45
Shape 364	13	8.21
Shape 365	2	7.74
Shape 366	4	8.51
Shape 367	7	7.52
Shape 368	5	7.52
Shape 369	9	9.15
Shape 370	5	7.52
Shape 371	18	7.6
Shape 372	10	7.7
Shape 373	7	8.12
Shape 374	18	8.15
Shape 375	9	7.65
Shape 376	11	5.08
Shape 377	10	9.26
Shape 378	1	8.32
Shape 379	10	7.86
Shape 380	10	7.68
Shape 381	5	4.4
Shape 382	10	7.6
Shape 383	7	8.35
Shape 384	8	5.71
Shape 385	19	5.26
Shape 386	13	4.48
Shape 387	13	4.94
Shape 388	13	4.5
Shape 389	13	4.46
Shape 390	13	5.46
Shape 391	17	5.21
Shape 392	4	4.74
Shape 393	10	5.48
Shape 394	9	3.49
Shape 395	18	4.86
Shape 396	9	4.68
Shape 397	2	2.15
Shape 398	2	2.32
Shape 399	13	3.26
Shape 400	20	3.56
Shape 401	9	4.2
Shape 402	2	2.57
Shape 403	16	5.5
Shape 404	13	5.83
Shape 405	18	5.66
Shape 406	9	3.8
Shape 407	9	3.67
Shape 408	8	4.37
Shape 409	8	3.75
Shape 410	8	3.74
Shape 411	19	4
Shape 412	8	3.2
Shape 413	8	3.36
Shape 414	8	4.06
Shape 415	19	5.22
Shape 416	8	4.53
Shape 417	8	5.01
Shape 418	8	4.51
Shape 419	16	3.51
Shape 420	12	3.76
Shape 421	20	3.44
Shape 422	20	3.42
Shape 423	15	3.88
Shape 424	8	4.22
Shape 425	20	5.29
Shape 426	8	4.96
Shape 427	20	5.99
Shape 428	4	4.26
Shape 429	11	3.69
Shape 430	19	3.89
Shape 431	13	4.85
Shape 432	2	5.87
Shape 433	5	5.57
Shape 434	14	2.13
Shape 435	12	2.65
Shape 436	4	4.59
Shape 437	8	5.2
Shape 438	8	2.64
Shape 439	8	5.23
Shape 440	8	4.06
Shape 441	8	2.79
Shape 442	8	2.48
Shape 443	12	2.47
Shape 444	20	2.66
Shape 445	20	3.24
Shape 446	12	3.93
Shape 447	12	4.02
Shape 448	14	3.35
Shape 449	12	3.11
Shape 450	12	2.59
Shape 451	17	3
Shape 452	20	2.22
Shape 453	20	2.81
Shape 454	20	2.91
Shape 455	12	3.52
Shape 456	13	3.89
Shape 457	8	3.87
Shape 458	20	2.42
Shape 459	14	2.71
Shape 460	20	3.01
Shape 461	20	3.05
Shape 462	15	2.7
Shape 463	20	2.9
Shape 464	20	3.37
Shape 465	20	2.95
Shape 466	20	4.2
Shape 467	20	3.75
Shape 468	20	4.03
Shape 469	20	4.05
Shape 470	3	2.61
Shape 471	7	3.52
Shape 472	7	3.18
Shape 473	13	4.58
Shape 474	13	4.17
Shape 475	13	3.59
Shape 476	18	3.32
Shape 477	8	3.31
Shape 478	8	3.48
Shape 479	8	4.72
Shape 480	16	4.32
Shape 481	17	4.11
Shape 482	16	4.61
Shape 483	16	4.5
Shape 484	16	3.99
Shape 485	15	2.92
Shape 486	8	3.25
Shape 487	15	3.63
Shape 488	15	3.24
Shape 489	15	3.14
Shape 490	15	2.56
Shape 491	15	3
Shape 492	15	2.88
Shape 493	20	2.91
Shape 494	14	2.63
Shape 495	19	2.64
Shape 496	8	2.76
Shape 497	9	3.15
Shape 498	18	3.3
Shape 499	20	3.07
Shape 500	20	2.95
Shape 501	20	3.15
Shape 502	20	4.16
Shape 503	12	4.16
Shape 504	12	3.81
Shape 505	12	3.41
Shape 506	12	2.74
Shape 507	20	2.62
Shape 508	14	3.62
Shape 509	9	3.98
Shape 510	9	3.49
Shape 511	16	6.08
Shape 512	17	5.52
Shape 513	7	7.81
Shape 514	9	5.44
Shape 515	18	4.08
Shape 516	4	4.85
Shape 517	12	2.83
Shape 518	8	1.98
Shape 519	8	1.69
Shape 520	8	2.71
Shape 521	19	2.88
Shape 522	8	3.39
Shape 523	19	3.67
Shape 524	19	3.88
Shape 525	19	4.18
Shape 526	15	3.34
Shape 527	15	3.37
Shape 528	15	3.05
Shape 529	15	3.66
Shape 530	15	3.62
Shape 531	15	3.83
Shape 532	15	4.25
Shape 533	15	4.2
Shape 534	15	2.87
Shape 535	15	3.47
Shape 536	15	3.96
Shape 537	11	5.03
Shape 538	15	3.18
Shape 539	15	4.6
Shape 540	15	3.74
Shape 541	15	4.05
Shape 542	15	2.66
Shape 543	15	4.23
Shape 544	20	3.57
Shape 545	14	4.7
Shape 546	20	5.5
Shape 547	12	4.74
Shape 548	18	2.8
Shape 549	19	2.22
Shape 550	19	2.64
Shape 551	19	3.24
Shape 552	19	3.77
Shape 553	14	2.08
Shape 554	20	4.96
Shape 555	19	4.46
Shape 556	8	4.1
Shape 557	8	3.56
Shape 558	17	4.2
Shape 559	17	3.92
Shape 560	16	3.86
Shape 561	20	4.44
Shape 562	20	3.72
Shape 563	17	4.01
Shape 564	9	4.72
Shape 565	17	3.73
Shape 566	17	3.68
Shape 567	19	4.69
Shape 568	17	4.75
Shape 569	9	6.64
Shape 570	17	7.02
Shape 571	14	4.87
Shape 572	19	3.55
Shape 573	19	3.24
Shape 574	18	3.53
Shape 575	8	4.19
Shape 576	17	4.77
Shape 577	14	3.04
Shape 578	19	2.85
Shape 579	19	2.43
Shape 580	15	3.08
Shape 581	19	3.61
Shape 582	17	4.21
Shape 583	8	3.71
Shape 584	19	3.54
Shape 585	8	4.54
Shape 586	8	4.6
Shape 587	19	5.14
Shape 588	17	5.04
Shape 589	8	5.27
Shape 590	13	5.8
Shape 591	16	5.46
Shape 592	19	2.94
Shape 593	17	2.98
Shape 594	16	3.67
Shape 595	16	4.08
Shape 596	17	4.33
Shape 597	9	5.2
Shape 598	19	3.72
Shape 599	16	4.25
Shape 600	9	4.91
Shape 601	9	3.99
Shape 602	5	3.42
Shape 603	15	2.68
Shape 604	15	2.72
Shape 605	15	3.46
Shape 606	15	3.79
Shape 607	7	3.66
Shape 608	14	1.61
Shape 609	4	2.66
Shape 610	19	2.13
Shape 611	17	2.7
Shape 612	14	2.13
Shape 613	2	2.57
Shape 614	2	2.54
Shape 615	12	1.78
Shape 616	14	2.16
Shape 617	16	4.39
Shape 618	3	3.07
Shape 619	6	3.59
Shape 620	5	1.92
Shape 621	11	1.98
Shape 622	9	3.33
Shape 623	9	6.77
Shape 624	4	7.68
Shape 625	14	3.94
Shape 626	19	3.82
Shape 627	19	4.18
Shape 628	19	3.68
Shape 629	19	4.3
Shape 630	13	3.74
Shape 631	17	3.2
Shape 632	13	3.21
Shape 633	17	3.13
Shape 634	15	3.32
Shape 635	9	4.08
Shape 636	17	3.97
Shape 637	17	4.19
Shape 638	17	3.53
Shape 639	16	4.26
Shape 640	17	3.52
Shape 641	17	4.1
Shape 642	16	4.06
Shape 643	16	5.29
Shape 644	17	5.24
Shape 645	17	5.4
Shape 646	18	5.5
Shape 647	9	4.57
Shape 648	18	5.02
Shape 649	15	5.42
Shape 650	17	3.95
Shape 651	4	4.86
Shape 652	9	4.68
Shape 653	3	1.6
Shape 654	14	2.55
Shape 655	5	1.2
Shape 656	6	1.4
Shape 657	6	3.04
Shape 658	3	1.89
Shape 659	11	1.86
Shape 660	12	1.99
Shape 661	14	2.91
Shape 662	14	2.77
Shape 663	19	3.41
Shape 664	8	4.07
Shape 665	19	3.3
Shape 666	5	4.83
Shape 667	13	4.75
Shape 668	8	4.34
Shape 669	4	3.33
Shape 670	4	4.57
Shape 671	5	1.91
Shape 672	14	2.59
Shape 673	12	2.13
Shape 674	12	3.51
Shape 675	12	2.93
Shape 676	8	2.94
Shape 677	8	3.64
Shape 678	16	4.04
Shape 679	3	4.61
Shape 680	3	4.94
Shape 681	16	4.52
Shape 682	16	4.62
Shape 683	19	3.42
Shape 684	19	4.16
Shape 685	19	3.29
Shape 686	19	3.89
Shape 687	19	3.51
Shape 688	19	3.59
Shape 689	19	3.44
Shape 690	19	3.34
Shape 691	19	3.39
Shape 692	19	3.94
Shape 693	19	2.55
Shape 694	19	2.62
Shape 695	19	2.69
Shape 696	20	2.96
Shape 697	8	2.61
Shape 698	8	2.99
Shape 699	19	3.13
Shape 700	15	4.69
Shape 701	13	3.76
Shape 702	13	3.17
Shape 703	20	2.98
Shape 704	19	2.66
Shape 705	18	4.01
Shape 706	14	3.33
Shape 707	14	3.29
Shape 708	8	5.55
Shape 709	9	6.35
Shape 710	9	6.09
Shape 711	9	7.3
Shape 712	18	7.19
Shape 713	9	6.34
Shape 714	16	6.13
Shape 715	9	5.43
Shape 716	9	4.71
Shape 717	18	5.45
Shape 718	9	3.82
Shape 719	16	6.16
Shape 720	13	3.73
Shape 721	9	2.66
Shape 722	9	3.29
Shape 723	14	2.33
Shape 724	14	2.16
Shape 725	14	3.2
Shape 726	8	3.13
Shape 727	16	4.1
Shape 728	16	3.98
Shape 729	12	3.4
Shape 730	5	2.6
Shape 731	5	2.84
Shape 732	19	3.19
Shape 733	19	3.06
Shape 734	19	2.8
Shape 735	19	3.63
Shape 736	4	4.29
Shape 737	2	3.48
Shape 738	7	3.25
Shape 739	3	4.49
Shape 740	7	2.79
Shape 741	12	2.38
Shape 742	12	2.5
Shape 743	5	3.22
Shape 744	16	2.58
Shape 745	2	3.03
Shape 746	18	4.21
Shape 747	18	3.81
Shape 748	2	4.37
Shape 749	19	3.6
Shape 750	19	3.27
Shape 751	19	3.11
Shape 752	15	3.39
Shape 753	15	3.42
Shape 754	15	3.1
Shape 755	11	3.01
Shape 756	19	3.09
Shape 757	18	3.71
Shape 758	13	4.58
Shape 759	13	5.77
Shape 760	19	5.12
Shape 761	18	4.25
Shape 762	7	4.02
Shape 763	18	5.1
Shape 764	18	5.27
Shape 765	18	5.89
Shape 766	18	3.38
Shape 767	18	4.47
Shape 768	18	4.32
Shape 769	18	4.81
Shape 770	18	4.96
Shape 771	18	5.34
Shape 772	3	3.84
Shape 773	9	3.98
Shape 774	2	3.37
Shape 775	8	3.05
Shape 776	3	2.3
Shape 777	12	3.04
Shape 778	17	2.89
Shape 779	17	2.36
Shape 780	14	4.4
Shape 781	5	3.99
Shape 782	14	4.08
Shape 783	19	3.7
Shape 784	15	4.13
Shape 785	13	3.33
Shape 786	19	3.02
Shape 787	15	2.95
Shape 788	15	3.49
Shape 789	15	3.13
Shape 790	15	2.33
Shape 791	9	3
Shape 792	20	2.62
Shape 793	11	2.21
Shape 794	14	3.12
Shape 795	12	2.8
Shape 796	10	2.36
Shape 797	10	3.38
Shape 798	19	3.93
Shape 799	9	2.53
Shape 800	17	2.5
Shape 801	13	2.11
Shape 802	19	2.17
Shape 803	19	3.14
Shape 804	19	2.77
Shape 805	19	2.54
Shape 806	19	2.78
Shape 807	13	2.66
Shape 808	8	2.87
Shape 809	18	3.86
Shape 810	3	4.17
Shape 811	14	3.45
Shape 812	5	2.24
Shape 813	5	2.19
Shape 814	5	2.92
Shape 815	14	2.55
Shape 816	2	2.98
Shape 817	15	2.54
Shape 818	15	2.38
Shape 819	15	3.17
Shape 820	15	3.11
Shape 821	11	3.44
Shape 822	11	4.12
Shape 823	11	4.68
Shape 824	3	5.18
Shape 825	3	5.75
Shape 826	9	5.41
Shape 827	9	5.92
Shape 828	9	5.16
Shape 829	5	7.61
Shape 830	5	6.44
Shape 831	17	4.73
Shape 832	16	4.17
Shape 833	16	5.08
Shape 834	16	3.87
Shape 835	16	3.91
Shape 836	18	3.92
Shape 837	3	3.19
Shape 838	3	3.51
Shape 839	13	2.86
Shape 840	16	2.64
Shape 841	13	3.43
Shape 842	3	4.56
Shape 843	3	2.91
Shape 844	13	3.4
Shape 845	4	4.34
Shape 846	4	4.87
Shape 847	4	6.44
Shape 848	11	6.09
Shape 849	11	3.2
Shape 850	5	6.02
Shape 851	9	3.78
Shape 852	9	3.21
Shape 853	18	5.75
Shape 854	9	6.52
Shape 855	18	6.42
Shape 856	14	3.17
Shape 857	9	2.91
Shape 858	9	3.21
Shape 859	9	3.99
Shape 860	4	4.07
Shape 861	17	4.79
Shape 862	9	3.01
Shape 863	16	2.83
Shape 864	16	3.24
Shape 865	16	3.16
Shape 866	16	3.97
Shape 867	14	3.54
Shape 868	5	1.97
Shape 869	13	2.39
Shape 870	9	2.72
Shape 871	7	3.11
Shape 872	12	4.35
Shape 873	4	2.54
Shape 874	12	2.6
Shape 875	8	2.53
Shape 876	8	3.23
Shape 877	8	3.32
Shape 878	8	3.57
Shape 879	11	2.98
Shape 880	8	2.91
Shape 881	19	3.79
Shape 882	8	3.5
Shape 883	19	3.55
Shape 884	19	3.49
Shape 885	8	4.62
Shape 886	19	3.47
Shape 887	8	3.43
Shape 888	19	3.75
Shape 889	20	3.63
Shape 890	19	3.86
Shape 891	13	4.97
Shape 892	19	4.08
Shape 893	9	5.83
Shape 894	13	4.53
Shape 895	8	4.71
Shape 896	5	5.58
Shape 897	17	4.32
Shape 898	12	4.29
Shape 899	14	4.84
Shape 900	11	6.02
Shape 901	13	6.09
Shape 902	18	6.35
Shape 903	18	5.16
Shape 904	9	5.28
Shape 905	10	3.8
Shape 906	11	2.85
Shape 907	14	4.61
Shape 908	9	5.63
Shape 909	9	5.51
Shape 910	16	3.41
Shape 911	16	4.5
Shape 912	18	3.87
Shape 913	11	3.63
Shape 914	17	3.89
Shape 915	16	2.66
Shape 916	15	2.78
Shape 917	15	3.04
Shape 918	15	3.42
Shape 919	15	3.26
Shape 920	15	3.68
Shape 921	15	3.78
Shape 922	15	3.43
Shape 923	15	3.32
Shape 924	15	3.39
Shape 925	15	3.34
Shape 926	15	2.76
Shape 927	19	3.03
Shape 928	19	3.27
Shape 929	12	3.83
Shape 930	11	2.16
Shape 931	11	2.05
Shape 932	19	1.56
Shape 933	12	2.1
Shape 934	12	1.92
Shape 935	13	1.64
Shape 936	12	1.92
Shape 937	15	3.28
Shape 938	12	2.25
Shape 939	15	3.57
Shape 940	19	1.98
Shape 941	14	4.91
Shape 942	19	2.71
Shape 943	12	2.01
Shape 944	8	2.07
Shape 945	18	3.41
Shape 946	12	2.07
Shape 947	11	4.86
Shape 948	20	2.09
Shape 949	15	4.54
Shape 950	19	2.65
Shape 951	9	3.05
Shape 952	8	3.07
Shape 953	18	3.5
Shape 954	8	2.5
Shape 955	9	3.74
Shape 956	8	2.83
Shape 957	3	3.37
Shape 958	15	2.73
Shape 959	16	3.67
Shape 960	15	3.24
Shape 961	9	2.75
Shape 962	15	2.98
Shape 963	5	1.93
Shape 964	15	3.03
Shape 965	14	2.54
Shape 966	15	3.29
Shape 967	5	2.92
Shape 968	15	2.81
Shape 969	4	2.25
Shape 970	15	2.73
Shape 971	3	2.5
Shape 972	15	3.03
Shape 973	12	2.92
Shape 974	15	4.52
Shape 975	5	3.15
Shape 976	15	3.46
Shape 977	9	2.6
Shape 978	15	3.38
Shape 979	5	3.27
Shape 980	20	2.94
Shape 981	17	3.31
Shape 982	20	3.89
Shape 983	5	3.78
Shape 984	20	3.54
Shape 985	5	2.8
Shape 986	20	4.07
Shape 987	5	2.62
Shape 988	8	4.34
Shape 989	12	2.94
Shape 990	20	4.31
Shape 991	5	2.98
Shape 992	20	4.31
Shape 993	18	4.71
Shape 994	20	5.46
Shape 995	12	2.26
Shape 996	20	4.38
Shape 997	5	2.29
Shape 998	15	3.53
Shape 999	5	2.31
Shape 1000	17	4.31
Shape 1001	11	2.66
Shape 1002	20	4.07
Shape 1003	12	2.35
Shape 1004	17	5.04
Shape 1005	12	2.9
Shape 1006	9	5.08
Shape 1007	5	2.82
Shape 1008	9	5.39
Shape 1009	12	2.54
Shape 1010	17	4.99
Shape 1011	12	1.87
Shape 1012	17	4.44
Shape 1013	12	1.7
Shape 1014	8	5.14
Shape 1015	19	2.03
Shape 1016	19	4.24
Shape 1017	12	2.14
Shape 1018	19	3.47
Shape 1019	12	1.66
Shape 1020	19	3.88
Shape 1021	11	1.76
Shape 1022	19	3.42
Shape 1023	14	1.96
Shape 1024	19	3.57
Shape 1025	14	2.26
Shape 1026	19	3.53
Shape 1027	12	2.62
Shape 1028	19	3.57
Shape 1029	12	2.09
Shape 1030	19	3.26
Shape 1031	14	2.07
Shape 1032	19	3.4
Shape 1033	17	3.18
Shape 1034	19	4.26
Shape 1035	17	2.55
Shape 1036	12	4.02
Shape 1037	12	1.99
Shape 1038	12	4.02
Shape 1039	12	2.04
Shape 1040	12	4.21
Shape 1041	14	2.4
Shape 1042	20	3.98
Shape 1043	14	2.01
Shape 1044	20	3.97
Shape 1045	14	2.04
Shape 1046	12	4.11
Shape 1047	14	2.21
Shape 1048	19	2.83
Shape 1049	14	2.18
Shape 1050	15	3.2
Shape 1051	14	2.27
Shape 1052	19	2.99
Shape 1053	14	2.54
Shape 1054	19	3.94
Shape 1055	3	2.52
Shape 1056	20	3.24
Shape 1057	14	3.25
Shape 1058	20	3.42
Shape 1059	8	2.98
Shape 1060	20	3.13
Shape 1061	8	3.02
Shape 1062	20	3.76
Shape 1063	18	3.04
Shape 1064	15	3.51
Shape 1065	11	2.8
Shape 1066	15	4.63
Shape 1067	3	3.24
Shape 1068	15	4.56
Shape 1069	3	3.34
Shape 1070	15	5.07
Shape 1071	2	2.74
Shape 1072	15	5.84
Shape 1073	10	5.89
Shape 1074	15	6.11
Shape 1075	7	7.47
Shape 1076	15	6.51
Shape 1077	7	5.04
Shape 1078	15	6.47
Shape 1079	18	4.12
Shape 1080	15	5.13
Shape 1081	18	7.2
Shape 1082	15	4.09
Shape 1083	10	4.43
Shape 1084	15	4.14
Shape 1085	4	1.29
Shape 1086	8	4.22
Shape 1087	2	1.59
Shape 1088	20	4.53
Shape 1089	2	2.04
Shape 1090	20	4.59
Shape 1091	4	2.3
Shape 1092	20	4.06
Shape 1093	2	2.35
Shape 1094	20	4.41
Shape 1095	14	2.54
Shape 1096	20	3.87
Shape 1097	15	4.61
Shape 1098	20	4.72
Shape 1099	20	4.89
Shape 1100	20	4.74
Shape 1101	20	4.94
Shape 1102	8	5.8
Shape 1103	6	2.35
Shape 1104	8	5.23
Shape 1105	11	1.81
Shape 1106	15	3.61
Shape 1107	4	1.47
Shape 1108	20	3.46
Shape 1109	18	5.74
Shape 1110	15	3.71
Shape 1111	6	3
Shape 1112	15	3.87
Shape 1113	2	1.64
Shape 1114	15	3.07
Shape 1115	5	4.38
Shape 1116	15	2.66
Shape 1117	6	2.96
Shape 1118	15	2.8
Shape 1119	9	4.41
Shape 1120	15	4.53
Shape 1121	11	3
Shape 1122	20	2.46
Shape 1123	12	2.57
Shape 1124	15	4.33
Shape 1125	5	2.93
Shape 1126	15	3.4
Shape 1127	2	3.18
Shape 1128	15	3.79
Shape 1129	13	3.03
Shape 1130	15	4.05
Shape 1131	14	2.48
Shape 1132	15	5.16
Shape 1133	17	2.93
Shape 1134	15	5.27
Shape 1135	14	2.51
Shape 1136	15	5.87
Shape 1137	14	2.6
Shape 1138	15	4.33
Shape 1139	14	2.69
Shape 1140	15	3.17
Shape 1141	9	2.81
Shape 1142	15	4.3
Shape 1143	9	3.07
Shape 1144	15	3.29
Shape 1145	9	2.95
Shape 1146	20	3.02
Shape 1147	14	3.09
Shape 1148	15	4.41
Shape 1149	7	3.17
Shape 1150	15	4.54
Shape 1151	6	3.4
Shape 1152	15	4.44
Shape 1153	9	3.55
Shape 1154	15	4.2
Shape 1155	9	3.59
Shape 1156	15	3.07
Shape 1157	2	7.43
Shape 1158	15	5.06
Shape 1159	2	6.08
Shape 1160	8	1.78
Shape 1161	15	5.36
Shape 1162	12	3.24
Shape 1163	15	5.15
Shape 1164	14	3.66
Shape 1165	15	3.51
Shape 1166	13	3.45
Shape 1167	15	5.15
Shape 1168	14	3.56
Shape 1169	15	5.28
Shape 1170	13	4.39
Shape 1171	15	3.33
Shape 1172	13	3.25
Shape 1173	15	3.06
Shape 1174	19	3.62
Shape 1175	15	3.84
Shape 1176	14	3.03
Shape 1177	15	4.63
Shape 1178	20	2.78
Shape 1179	15	4.67
Shape 1180	14	3.29
Shape 1181	15	3.94
Shape 1182	12	2.96
Shape 1183	15	4.12
Shape 1184	20	3.57
Shape 1185	15	5.03
Shape 1186	13	4.18
Shape 1187	15	5.92
Shape 1188	13	4.32
Shape 1189	15	6.11
Shape 1190	11	3.94
Shape 1191	15	5.84
Shape 1192	11	3.28
Shape 1193	15	6.42
Shape 1194	11	3.6
Shape 1195	15	6.76
Shape 1196	9	3.77
Shape 1197	15	6.31
Shape 1198	9	4.76
Shape 1199	15	6.59
Shape 1200	17	4.55
Shape 1201	15	5.38
Shape 1202	6	5
Shape 1203	20	2.82
Shape 1204	4	4.22
Shape 1205	15	2.95
Shape 1206	6	3.76
Shape 1207	20	2.95
Shape 1208	2	3.42
Shape 1209	15	3.96
Shape 1210	5	3.81
Shape 1211	15	3.55
Shape 1212	14	3.63
Shape 1213	20	3.56
Shape 1214	9	3.66
Shape 1215	13	3.74
Shape 1216	14	4.07
Shape 1217	9	3.51
Shape 1218	2	4.85
Shape 1219	20	3.33
Shape 1220	12	4.16
Shape 1221	20	7
Shape 1222	12	3.94
Shape 1223	6	1.91
Shape 1224	12	5.83
Shape 1225	12	3.41
Shape 1226	10	5.07
Shape 1227	14	2.95
Shape 1228	9	2.4
Shape 1229	13	5.19
Shape 1230	11	2.23
Shape 1231	17	4.6
Shape 1232	14	3.47
Shape 1233	17	4.51
Shape 1234	11	3.8
Shape 1235	17	4.18
Shape 1236	15	5.08
Shape 1237	3	3.11
Shape 1238	18	3.4
Shape 1239	17	4.52
Shape 1240	11	6.54
Shape 1241	20	2.57
Shape 1242	16	4.47
Shape 1243	8	2.81
Shape 1244	3	3.39
Shape 1245	16	4.6
Shape 1246	20	4.62
Shape 1247	15	3.36
Shape 1248	20	4.52
Shape 1249	18	4.62
Shape 1250	20	3.68
Shape 1251	16	4.54
Shape 1252	20	3.91
Shape 1253	15	5.04
Shape 1254	20	4.53
Shape 1255	15	4.02
Shape 1256	19	2.76
Shape 1257	11	5.18
Shape 1258	12	3.88
Shape 1259	15	5.42
Shape 1260	12	5.3
Shape 1261	11	4.97
Shape 1262	2	5.96
Shape 1263	15	5.38
Shape 1264	20	4.22
Shape 1265	16	6.09
Shape 1266	20	4.06
Shape 1267	16	6.92
Shape 1268	20	4.25
Shape 1269	15	13.2
Shape 1270	20	4.46
Shape 1271	17	10.18
Shape 1272	12	3.22
Shape 1273	18	8.56
Shape 1274	20	3.16
Shape 1275	19	4.08
Shape 1276	12	3.36
Shape 1277	13	3.81
Shape 1278	12	2.94
Shape 1279	13	4.4
Shape 1280	16	3.11
Shape 1281	8	2.29
Shape 1282	2	4.1
Shape 1283	12	2.34
Shape 1284	19	3.77
Shape 1285	12	2.69
Shape 1286	2	3.79
Shape 1287	12	1.84
Shape 1288	19	3.25
Shape 1289	12	1.95
Shape 1290	19	3.72
Shape 1291	12	2.32
Shape 1292	8	2.97
Shape 1293	6	3.54
Shape 1294	12	2.67
Shape 1295	13	6.15
Shape 1296	12	2.26
Shape 1297	17	6.77
Shape 1298	12	2.13
Shape 1299	13	7.17
Shape 1300	12	2.4
Shape 1301	3	7.44
Shape 1302	12	2.94
Shape 1303	3	6.9
Shape 1304	12	4.3
Shape 1305	8	6.56
Shape 1306	12	2.64
Shape 1307	9	5.36
Shape 1308	12	2.11
Shape 1309	2	6.5
Shape 1310	12	2.22
Shape 1311	10	7.84
Shape 1312	12	2.31
Shape 1313	18	4.98
Shape 1314	20	2.1
Shape 1315	16	3.82
Shape 1316	20	2.14
Shape 1317	18	3.95
Shape 1318	12	2.49
Shape 1319	8	2.73
Shape 1320	20	2.12
Shape 1321	19	3.09
Shape 1322	12	3.1
Shape 1323	8	3.08
Shape 1324	8	3.28
Shape 1325	8	4.27
Shape 1326	13	4.23
Shape 1327	13	4.25
Shape 1328	13	4.41
Shape 1329	13	4.52
Shape 1330	17	4.59
Shape 1331	13	5.27
Shape 1332	13	5.44
Shape 1333	17	5.45
Shape 1334	17	5.21
Shape 1335	8	4.83
Shape 1336	13	5.67
Shape 1337	13	4.35
Shape 1338	12	3.47
Shape 1339	20	3.23
Shape 1340	20	4.03
Shape 1341	20	4.83
Shape 1342	20	7.5
Shape 1343	20	4
Shape 1344	20	4.09
Shape 1345	20	3.94
Shape 1346	8	4.28
Shape 1347	20	4.42
Shape 1348	8	3.71
Shape 1349	17	4.49
Shape 1350	16	4.27
Shape 1351	16	5.69
Shape 1352	15	3.13
Shape 1353	16	5.23
Shape 1354	15	4.02
Shape 1355	15	4.72
Shape 1356	15	4.64
Shape 1357	15	5.02
Shape 1358	15	4.2
Shape 1359	15	3.74
Shape 1360	20	3.65
Shape 1361	15	3.4
Shape 1362	20	3.12
Shape 1363	20	4.12
Shape 1364	20	3.73
Shape 1365	20	4.27
Shape 1366	12	4.97
Shape 1367	20	4.39
Shape 1368	20	4.51
Shape 1369	12	4.85
Shape 1370	20	4.2
Shape 1371	20	2.94
Shape 1372	19	3.64
Shape 1373	13	3.37
Shape 1374	13	2.9
Shape 1375	16	2.81
Shape 1376	9	3.01
Shape 1377	9	2.87
Shape 1378	13	2.52
Shape 1379	2	2.85
Shape 1380	12	1.8
Shape 1381	5	2.5
Shape 1382	14	2.13
Shape 1383	14	2.17
Shape 1384	12	2.1
Shape 1385	12	2.47
Shape 1386	14	2.46
Shape 1387	14	2.37
Shape 1388	20	2.7
Shape 1389	12	2.3
Shape 1390	12	2.62
Shape 1391	12	3.3
Shape 1392	12	2.31
Shape 1393	12	2.53
Shape 1394	12	2.52
Shape 1395	14	2.49
Shape 1396	9	2.45
Shape 1397	9	2.83
Shape 1398	9	3.23
Shape 1399	3	3.23
Shape 1400	13	3.15
Shape 1401	16	3.65
Shape 1402	17	3.91
Shape 1403	17	3.74
Shape 1404	17	4.33
Shape 1405	13	4.95
Shape 1406	12	4.23
Shape 1407	5	3.62
Shape 1408	5	3.34
Shape 1409	5	3.1
Shape 1410	5	3.14
Shape 1411	18	2.89
Shape 1412	9	2.75
Shape 1413	20	3.98
Shape 1414	20	3.88
Shape 1415	20	3.24
Shape 1416	17	3.77
Shape 1417	15	3.09
Shape 1418	15	2.82
Shape 1419	16	2.75
Shape 1420	9	3.59
Shape 1421	9	4.17
Shape 1422	5	4.02
Shape 1423	11	3.49
Shape 1424	2	2.39
Shape 1425	2	3.25
Shape 1426	8	3.47
Shape 1427	2	3.3
Shape 1428	17	3.22
Shape 1429	17	4.04
Shape 1430	2	3.7
Shape 1431	8	2.18
Shape 1432	8	2.49
Shape 1433	9	2.81
Shape 1434	20	3.01
Shape 1435	9	4.19
Shape 1436	17	4.66
Shape 1437	17	4.32
Shape 1438	16	4.98
Shape 1439	15	3.54
Shape 1440	20	2.76
Shape 1441	2	3.83
Shape 1442	2	4.6
Shape 1443	12	3.67
Shape 1444	2	4.65
Shape 1445	2	4.7
Shape 1446	17	4.88
Shape 1447	19	4.24
Shape 1448	11	4.53
Shape 1449	2	4.69
Shape 1450	19	4.25
Shape 1451	19	4.52
Shape 1452	19	4.29
Shape 1453	20	2.6
Shape 1454	19	3.82
Shape 1455	19	5.22
Shape 1456	19	3.19
Shape 1457	19	3.06
Shape 1458	19	3.25
Shape 1459	19	2.8
Shape 1460	20	4.66
Shape 1461	19	3.64
Shape 1462	19	3.46
Shape 1463	19	3.79
Shape 1464	20	3.45
Shape 1465	20	3.6
Shape 1466	20	3.97
Shape 1467	20	4.39
Shape 1468	19	2.9
Shape 1469	15	2.61
Shape 1470	14	4.29
Shape 1471	14	4.43
Shape 1472	19	3.92
Shape 1473	11	5.82
Shape 1474	3	3.42
Shape 1475	9	4.74
Shape 1476	14	2.68
Shape 1477	18	5
Shape 1478	14	3.22
Shape 1479	14	3.71
Shape 1480	12	3.12
Shape 1481	12	4.4
Shape 1482	12	2.39
Shape 1483	20	2.7
Shape 1484	20	3.06
Shape 1485	20	2.98
Shape 1486	13	3.11
Shape 1487	5	2.51
Shape 1488	5	2.84
Shape 1489	7	2.16
Shape 1490	14	2.61
Shape 1491	14	3.01
Shape 1492	14	2.45
Shape 1493	14	3.18
Shape 1494	14	2.74
Shape 1495	18	4.36
Shape 1496	14	3.12
Shape 1497	20	3.71
Shape 1498	20	3.12
Shape 1499	3	3.13
Shape 1500	12	2.85
