# Supplementary material for: Spatiotemporal dynamics of PIEZO1 localization controls keratinocyte migration during wound healing
Source: eLife. 2021 Sep 27;10:e65415. doi: 10.7554/eLife.65415 (PMC8577841; doi:10.7554/eLife.65415)
Supplement: Figure 4—source data 1. — (Sheet 1) PIEZO1-tdTomato Kymobutler tracks plotted in Figure 4G. [file elife-65415-fig4-data1.xlsx]

## Sheet: Fig 4G-Kymobutler
Kymobutler Tracks plotted in Figure 4G.
Track 1	Track 1	Track 2	Track 2	Track 3	Track 3	Track 4	Track 4	Track 5	Track 5	Track 6	Track 6	Track 7	Track 7	Track 8	Track 8	Track 9	Track 9	Track 10	Track 10	Track 11	linr 11	linr 12	Track 12	Track 13	Track 13	Track 14	Track 14	Track 15	Track 15	Track 16	Track 16	Track 17	Track 17	Track 18	Track 18	Track 19	Track 19	Track 20	Track 20	Track 21	Track 21	Track 22	Track 22	Track 23	Track 23	Track 24	Track 24	Track 25	Track 25
minutes	μm	minutes	μm	minutes	μm	minutes	μm	minutes	μm	minutes	μm	minutes	μm	minutes	μm	minutes	μm	minutes	μm	minutes	μm	minutes	μm	minutes	μm	minutes	μm	minutes	μm	minutes	μm	minutes	μm	minutes	μm	minutes	μm	minutes	μm	minutes	μm	minutes	μm	minutes	μm	minutes	μm	minutes	μm
0	0	0	0	0	0	0	0	0	0	0	0	0	0	0	0	0	0	0	0	0	0	0	0	0	0	0	0	0	0	0	0	0	0	0	0	0	0	0	0	0	0	0	0	0	0	0	0	0	0
10	-2.9484	10	-0.546	10	0.1092	10	0.546	10	-1.2012	10	-2.73	10	0.4368	10	0.4368	10	-0.4368	10	-0.2184	10	-1.2012	10	0.4368	10	0.4368	10	0.9828	10	-0.6552	10	-0.546	10	-0.3276	10	0.6552	10	-0.2184	10	-2.0748	10	-0.546	10	1.2012	10	-2.5116	10	0.4368	10	-0.4368
20	-5.7876	20	-1.7472	20	0.3276	20	1.3104	20	-3.822	20	-6.6612	20	2.2932	20	0.7644	20	-1.092	20	-0.546	20	-5.2416	20	1.638	20	1.4196	20	2.73	20	-2.4024	20	-3.276	20	-0.6552	20	2.4024	20	-0.9828	20	-5.46	20	-1.8564	20	2.8392	20	-6.4428	20	1.4196	20	-2.5116
30	-6.2244	30	-3.7128	30	0.6552	30	1.8564	30	-4.5864	30	-9.0636	30	2.8392	30	1.2012	30	-1.4196	30	-0.6552	30	-6.9888	30	2.73	30	2.5116	30	4.8048	30	-4.5864	30	-4.2588	30	-0.8736	30	4.5864	30	-2.184	30	-7.2072	30	-2.73	30	3.3852	30	-8.9544	30	2.6208	30	-5.2416
40	-7.2072	40	-7.2072	40	0.8736	40	2.4024	40	-5.8968	40	-11.466	40	5.46	40	3.9312	40	-2.4024	40	-1.092	40	-10.8108	40	3.6036	40	3.822	40	7.2072	40	-7.2072	40	-8.8452	40	-1.4196	40	5.6784	40	-3.6036	40	-8.19	40	-3.1668	40	3.4944	40	-11.466	40	3.276	40	-7.3164
50	-9.7188	50	-11.7936	50	1.092	50	3.822	50	-6.6612	50	-14.5236	50	6.8796	50	5.3508	50	-3.9312	50	-1.5288	50	-14.3052	50	4.0404	50	6.006	50	9.828	50	-8.5176	50	-11.9028	50	-1.9656	50	6.1152	50	-6.4428	50	-9.0636	50	-3.822	50	3.4944	50	-14.9604	50	3.7128	50	-10.8108
60	-10.8108	60	-16.2708	60	1.2012	60	5.46	60	-8.0808	60	-17.9088	60	9.3912	60	7.8624	60	-5.6784	60	-2.184	60	-18.3456	60	4.368	60	7.9716	60	10.4832	60	-9.6096	60	-12.558	60	-2.4024	60	8.4084	60	-10.1556	60	-9.9372	60	-4.2588	60	3.276	60	-20.3112	60	4.368	60	-15.9432
70	-12.8856	70	-19.8744	70	1.5288	70	9.1728	70	-7.5348	70	-21.5124	70	11.466	70	9.9372	70	-8.9544	70	-2.73	70	-21.0756	70	5.7876	70	9.5004	70	13.4316	70	-11.0292	70	-12.8856	70	-2.8392	70	9.282	70	-13.104	70	-10.8108	70	-4.4772	70	1.5288	70	-26.754	70	5.46	70	-17.6904
		80	-22.7136	80	1.7472	80	11.1384			80	-25.5528	80	14.196	80	12.6672	80	-12.012	80	-3.1668	80	-22.932	80	7.9716	80	10.8108			80	-13.104	80	-13.2132	80	-3.0576	80	11.9028	80	-17.7996	80	-11.6844	80	-6.2244	80	-1.092	80	-30.6852	80	6.8796	80	-21.7308
		90	-24.8976	90	2.4024	90	15.5064					90	15.288	90	13.7592	90	-13.7592	90	-4.1496	90	-23.5872			90	15.288			90	-15.1788	90	-13.65	90	-4.2588	90	11.7936	90	-22.8228	90	-13.104	90	-8.8452	90	-1.9656	90	-32.4324	90	8.0808
				100	3.0576	100	17.2536					100	18.7824	100	17.2536	100	-15.0696			100	-23.5872			100	16.2708			100	-18.018	100	-14.3052	100	-5.3508			100	-26.208	100	-13.8684	100	-9.7188
				110	4.914	110	18.2364									110	-17.0352											110	-19.7652	110	-14.742	110	-9.828			110	-27.6276	110	-14.6328
																120	-19.4376													120	-15.9432	120	-13.3224
																130	-22.0584													130	-17.0352	130	-16.4892
																																140	-17.2536
																																150	-18.3456
																																160	-19.2192
																																170	-19.7652
																																180	-20.3112
[truncated: 58 more columns]
