# Supplementary material for: Spatiotemporal dynamics of PIEZO1 localization controls keratinocyte migration during wound healing
Source: eLife. 2021 Sep 27;10:e65415. doi: 10.7554/eLife.65415 (PMC8577841; doi:10.7554/eLife.65415)
Supplement: Figure 5—figure supplement 1—source data 1. — (Sheet 1) Quantification of the speed of retraction events marked by white lines from kymographs shown in Figure 5A and B, and Figure 5—figure supplement 1A and B. [file elife-65415-fig5-figsupp1-data1.xlsx]

## Sheet: SuppFig8_SourceData
Measurements of white lines plotted in Fig 5A (Con(cKO)), Fig 5B (cKO), Supp. Fig 8A (Con(GoF)), Supp. Fig. 8B (GoF). Source data from plot shown in Supp. Fig. 8C; Speed column is plotted in graph for each kymograph.
Kymograph Name	Angle	Length	Distance Retract	Time Retract	Speed	Kymograph Name	Angle	Length	Distance Retract	Time Retract	Speed	Kymograph Name	Angle	Length	Distance Retract	Time Retract	Speed	Kymograph Name	Angle	Length	Distance Retract	Time Retract	Speed	Kymograph Name	Angle	Length	Distance Retract	Time Retract	Speed	Kymograph Name	Angle	Length	Distance Retract	Time Retract	Speed
Con(cKO)+DMSO(Fig. 5A)	Con(cKO)+DMSO(Fig. 5A)	Con(cKO)+DMSO(Fig. 5A)	Con(cKO)+DMSO(Fig. 5A)	Con(cKO)+DMSO(Fig. 5A)	Con(cKO)+DMSO(Fig. 5A)	Con(cKO)+Yoda1(Fig. 5A)	Con(cKO)+Yoda1(Fig. 5A)	Con(cKO)+Yoda1(Fig. 5A)	Con(cKO)+Yoda1(Fig. 5A)	Con(cKO)+Yoda1(Fig. 5A)	Con(cKO)+Yoda1(Fig. 5A)	cKO+DMSO(Fig. 5B)	cKO+DMSO(Fig. 5B)	cKO+DMSO(Fig. 5B)	cKO+DMSO(Fig. 5B)	cKO+DMSO(Fig. 5B)	cKO+DMSO(Fig. 5B)	cKO+Yoda1(Fig. 5B)	cKO+Yoda1(Fig. 5B)	cKO+Yoda1(Fig. 5B)	cKO+Yoda1(Fig. 5B)	cKO+Yoda1(Fig. 5B)	cKO+Yoda1(Fig. 5B)	Con(GoF)(Supp. Fig. 8A)	Con(GoF)(Supp. Fig. 8A)	Con(GoF)(Supp. Fig. 8A)	Con(GoF)(Supp. Fig. 8A)	Con(GoF)(Supp. Fig. 8A)	Con(GoF)(Supp. Fig. 8A)	GoF(Supp. Fig. 8B)	GoF(Supp. Fig. 8B)	GoF(Supp. Fig. 8B)	GoF(Supp. Fig. 8B)	GoF(Supp. Fig. 8B)	GoF(Supp. Fig. 8B)
	Degree	um	um	minutes	um/minute		Degree	um	um	minutes	um/minute		Degree	um	um	minutes	um/minute		Degree	um	um	minutes	um/minute		Degree	um	um	minutes	um/minute		Degree	um	um	minutes	um/minute
Control(cKO)+DMSO	26.565	2.414	1.07957	0.55362	1.95001	Control(cKO)+Yoda1	70.396	16.733	15.7631	1.43953	10.9501	cKO Kymograph+DMSO	52.765	15.572	12.3978	7.19046	1.7242	cKO Kymograph+Yoda1	68.806	2.896	2.70012	0.79898	3.37947	Con(GoF) Kymograph	43.603	0.619	0.4269	0.34206	1.24801	GoF Kymograph	21.038	0.892	0.32022	0.63533	0.50401
Control(cKO)+DMSO	13.191	14.195	3.23927	3.54368	0.9141	Control(cKO)+Yoda1	69.171	10.628	9.93342	0.96899	10.2513	cKO Kymograph+DMSO	41.348	1.835	1.21226	1.05125	1.15316	cKO Kymograph+Yoda1	40.236	0.938	0.60589	0.54644	1.10879	Con(GoF) Kymograph	23.356	1.024	0.40596	0.71741	0.56587	GoF Kymograph	48.576	0.968	0.72584	0.48875	1.4851
Control(cKO)+DMSO	12.295	17.239	3.67096	4.31884	0.84999	Control(cKO)+Yoda1	73.61	3.826	3.67052	0.27682	13.2597	cKO Kymograph+DMSO	46.397	1.598	1.15717	0.84102	1.37591	cKO Kymograph+Yoda1	59.744	0.765	0.66079	0.29415	2.24644	Con(GoF) Kymograph	9.462	0.65	0.10686	0.48928	0.21839	GoF Kymograph	24.538	1.08	0.44852	0.74974	0.59823
Control(cKO)+DMSO	11.165	8.364	1.61956	2.10401	0.76975	Control(cKO)+Yoda1	68.908	8.101	7.55826	0.7475	10.1114	cKO Kymograph+DMSO	69.444	0.942	0.88202	0.25241	3.49441	cKO Kymograph+Yoda1	60.642	1.012	0.88203	0.37862	2.32958	Con(GoF) Kymograph	10.061	1.345	0.23497	1.01062	0.2325	GoF Kymograph	25.017	1.414	0.59796	0.97782	0.61152
Control(cKO)+DMSO	4.503	45.379	3.56276	11.5996	0.30714	Control(cKO)+Yoda1	21.038	4.511	1.61939	1.07956	1.50005	cKO Kymograph+DMSO	34.114	2.063	1.15702	1.30342	0.88768	cKO Kymograph+Yoda1	30.129	7.135	3.5814	4.70928	0.7605	Con(GoF) Kymograph	33.69	0.539	0.29898	0.34224	0.8736	GoF Kymograph	34.261	1.783	1.00376	1.12455	0.89259
						Control(cKO)+Yoda1	77.159	15.06	14.6834	0.85821	17.1094	cKO Kymograph+DMSO	73.496	3.103	2.97516	0.6727	4.42271	cKO Kymograph+Yoda1	6.34	0.998	0.11021	0.75694	0.1456	Con(GoF) Kymograph	10.389	1.303	0.23497	0.97805	0.24024	GoF Kymograph	20.336	3.257	1.13189	2.33058	0.48567
						Control(cKO)+Yoda1	66.371	3.771	3.45484	0.38755	8.91451	cKO Kymograph+DMSO	24.669	10.429	4.35281	7.23228	0.60186	cKO Kymograph+Yoda1	45	15.897	11.2409	8.57819	1.3104	Con(GoF) Kymograph	1.931	1.902	0.06409	1.45064	0.04418	GoF Kymograph	27.897	0.411	0.1923	0.2772	0.69373
						Control(cKO)+Yoda1	66.886	9.626	8.85328	0.96892	9.1373	cKO Kymograph+DMSO	51.072	1.842	1.43296	0.88325	1.62238	cKO Kymograph+Yoda1	11.954	12.504	2.58991	9.33519	0.27743	Con(GoF) Kymograph	3.434	2.14	0.12818	1.63016	0.07863	GoF Kymograph	16.928	1.54	0.4484	1.12429	0.39883
						Control(cKO)+Yoda1	75.16	13.068	12.6321	0.85819	14.7194	cKO Kymograph+DMSO	61.763	3.377	2.97513	1.21926	2.4401	cKO Kymograph+Yoda1	50.906	1.136	0.88166	0.54667	1.61279	Con(GoF) Kymograph	3.294	2.974	0.17088	2.26578	0.07542	GoF Kymograph	23.839	1.004	0.40578	0.70081	0.57902
						Control(cKO)+Yoda1	61.699	1.594	1.40347	0.19377	7.24284	cKO Kymograph+DMSO	46.469	1.52	1.102	0.79891	1.37938	cKO Kymograph+Yoda1	31.185	4.895	2.53465	3.19572	0.79314	Con(GoF) Kymograph	10.305	1.194	0.21359	0.89647	0.23826	GoF Kymograph	19.213	1.493	0.49132	1.07589	0.45666
						Control(cKO)+Yoda1	73.202	5.977	5.72196	0.44291	12.9192	cKO Kymograph+DMSO	47.968	5.267	3.91217	2.69116	1.45371							Con(GoF) Kymograph	19.983	1	0.34174	0.71718	0.47651	GoF Kymograph	17.84	1.952	0.59801	1.41799	0.42173
						Control(cKO)+Yoda1	63.435	1.449	1.29603	0.16616	7.80008	cKO Kymograph+DMSO	34.624	8.437	4.79381	5.29822	0.9048							Con(GoF) Kymograph	3.338	2.568	0.14952	1.95638	0.07643	GoF Kymograph	23.199	0.813	0.32026	0.57025	0.56161
						Control(cKO)+Yoda1	80.44	20.803	20.5141	0.88588	23.1567	cKO Kymograph+DMSO	45	0.857	0.60599	0.46245	1.3104							Con(GoF) Kymograph	10.46	1.412	0.25635	1.05963	0.24192	GoF Kymograph	14.036	2.906	0.7048	2.15143	0.32759
						Control(cKO)+Yoda1	63.435	4.346	3.88718	0.49835	7.80008													Con(GoF) Kymograph	5.315	1.845	0.1709	1.40191	0.12191	GoF Kymograph	15.255	0.974	0.25627	0.71709	0.35738
						Control(cKO)+Yoda1	67.345	13.455	12.4168	1.32887	9.34393																			GoF Kymograph	25.514	1.041	0.44839	0.71694	0.62542
						Control(cKO)+Yoda1	70.346	8.025	7.55747	0.69208	10.92																			GoF Kymograph	38.157	1.141	0.70493	0.68467	1.02959
						Control(cKO)+Yoda1	72.031	8.399	7.98933	0.66438	12.0252																			GoF Kymograph	42.357	0.983	0.66229	0.55433	1.19476
						Control(cKO)+Yoda1	72.309	13.146	12.5243	1.02431	12.227																			GoF Kymograph	42.979	1.284	0.87534	0.71686	1.22107
						Control(cKO)+Yoda1	71.162	9.697	9.17758	0.80284	11.4314																			GoF Kymograph	41.987	0.575	0.38465	0.32616	1.17935
						Control(cKO)+Yoda1	64.747	12.654	11.4447	1.38419	8.26812																			GoF Kymograph	32.661	0.989	0.53373	0.63539	0.84
						Control(cKO)+Yoda1	65.556	3.914	3.56317	0.41529	8.58005																			GoF Kymograph	41.424	0.968	0.64045	0.55391	1.15625
						Control(cKO)+Yoda1	35.776	9.049	5.29021	1.88243	2.81031																			GoF Kymograph	32.106	1.286	0.68349	0.83129	0.8222
						Control(cKO)+Yoda1	57.894	13.001	11.0127	1.77175	6.21573																			GoF Kymograph	34.846	2.056	1.17474	1.28765	0.91231
																														GoF Kymograph	28.163	2.398	1.13181	1.61332	0.70154
																														GoF Kymograph	31.701	1.707	0.89701	1.1083	0.80935
																														GoF Kymograph	32.005	1.41	0.74729	0.91246	0.81899
																														GoF Kymograph	33.69	0.924	0.51254	0.5867	0.8736
																														GoF Kymograph	54.583	1.179	0.96083	0.52141	1.84276
																														GoF Kymograph	38.66	1.094	0.68342	0.65191	1.04833
