# Supplementary material for: Spatiotemporal dynamics of PIEZO1 localization controls keratinocyte migration during wound healing
Source: eLife. 2021 Sep 27;10:e65415. doi: 10.7554/eLife.65415 (PMC8577841; doi:10.7554/eLife.65415)
Supplement: Figure 5—figure supplement 2—source data 1. — Data used to create heatmaps of cell edge velocity along detected cell boundaries from the (Sheet 2) Piezo1-GoF and (Sheet 1) ControlGoF cells shown in Figure 5C and D. [file elife-65415-fig5-figsupp2-data1.xlsx]

## Sheet: Supp Fig. 9 Con(GoF) Heatmap
Velocity Heatmap for segmented Con(GoF) keratinocytes as seen in Supp Fig. 9
	Time(sec)
Norm. Pos	0	5	10	15	20	25	30	35	40	45	50	55	60	65	70	75	80	85	90	95	100	105	110	115	120	125	130	135	140	145	150	155	160	165	170	175	180	185	190	195	200	205	210	215	220	225	230	235	240
0.000184706	0.01734	0.02979	0.02191	0.0119	0.01197	0.0178	0.01963	0.00569	-0.02117	-0.0323	-0.02415	-0.02968	-0.05601	-0.06704	-0.04424	-0.01377	0.01221	0.02981	0.02209	-0.00197	-0.03569	-0.06498	-0.05893	-0.05396	-0.06159	-0.03982	-0.02649	-0.03917	-0.03731	-0.02445	-0.00898	0.01487	0.03465	0.042	0.026	0.000519268	-0.00802	-0.00941	-0.01112	-0.00917	0.00211	0.01522	0.0158	-0.0122	-0.05319	-0.05929	-0.02842	0.00418	0.04524
0.000369413	0.01736	0.02981	0.02184	0.01171	0.01189	0.01792	0.01974	0.00571	-0.0211	-0.03222	-0.02409	-0.02932	-0.05518	-0.066	-0.04349	-0.0135	0.01212	0.02951	0.02182	-0.002	-0.03525	-0.06412	-0.05819	-0.05327	-0.06078	-0.03943	-0.02637	-0.03885	-0.03695	-0.02417	-0.0089	0.0145	0.03396	0.0413	0.02564	0.000562737	-0.00792	-0.00946	-0.01125	-0.00929	0.00186	0.01486	0.0156	-0.0118	-0.0521	-0.05819	-0.02794	0.00411	0.04454
0.000554119	0.01738	0.02983	0.02176	0.01152	0.0118	0.01802	0.01986	0.00572	-0.02104	-0.03215	-0.02402	-0.02896	-0.05434	-0.06495	-0.04274	-0.01324	0.01203	0.02921	0.02156	-0.00203	-0.03481	-0.06326	-0.05745	-0.05257	-0.05996	-0.03905	-0.02626	-0.03853	-0.03659	-0.02388	-0.00881	0.01413	0.03326	0.0406	0.02527	0.00060484	-0.00781	-0.00951	-0.01138	-0.00941	0.00162	0.01449	0.0154	-0.01141	-0.05101	-0.05709	-0.02745	0.00404	0.04384
0.000738825	0.0174	0.02986	0.02169	0.01133	0.0117	0.01812	0.01996	0.00573	-0.02099	-0.03209	-0.02397	-0.02861	-0.05351	-0.0639	-0.04198	-0.01297	0.01194	0.02892	0.0213	-0.00206	-0.03437	-0.0624	-0.05672	-0.05187	-0.05915	-0.03866	-0.02614	-0.0382	-0.03622	-0.0236	-0.00872	0.01377	0.03256	0.03989	0.02489	0.000645505	-0.0077	-0.00955	-0.0115	-0.00952	0.00137	0.01412	0.01519	-0.01103	-0.04992	-0.05599	-0.02697	0.00396	0.04313
0.000923532	0.01743	0.02989	0.02162	0.01113	0.0116	0.01821	0.02006	0.00573	-0.02094	-0.03203	-0.02392	-0.02826	-0.05268	-0.06285	-0.04122	-0.0127	0.01186	0.02863	0.02104	-0.00209	-0.03393	-0.06154	-0.05599	-0.05118	-0.05833	-0.03827	-0.02602	-0.03787	-0.03586	-0.02332	-0.00864	0.0134	0.03186	0.03918	0.02452	0.00068466	-0.00759	-0.00959	-0.01161	-0.00963	0.00113	0.01375	0.01498	-0.01065	-0.04884	-0.05489	-0.02649	0.00388	0.04242
0.00111	0.01745	0.02993	0.02155	0.01093	0.01149	0.01829	0.02016	0.00573	-0.0209	-0.03198	-0.02387	-0.02791	-0.05185	-0.0618	-0.04046	-0.01242	0.01178	0.02835	0.02078	-0.00211	-0.03349	-0.06068	-0.05525	-0.05048	-0.05751	-0.03788	-0.0259	-0.03754	-0.03549	-0.02304	-0.00855	0.01303	0.03116	0.03847	0.02414	0.000722233	-0.00748	-0.00962	-0.01172	-0.00973	0.000895721	0.01338	0.01476	-0.01028	-0.04776	-0.0538	-0.02601	0.0038	0.0417
0.00129	0.01748	0.02996	0.02148	0.01072	0.01137	0.01837	0.02025	0.00572	-0.02086	-0.03194	-0.02383	-0.02757	-0.05102	-0.06075	-0.0397	-0.01215	0.0117	0.02806	0.02052	-0.00214	-0.03305	-0.05983	-0.05452	-0.04979	-0.05669	-0.03749	-0.02577	-0.0372	-0.03512	-0.02275	-0.00847	0.01267	0.03045	0.03775	0.02375	0.000758152	-0.00737	-0.00964	-0.01181	-0.00982	0.000662795	0.01301	0.01453	-0.00991	-0.04669	-0.0527	-0.02553	0.0037	0.04098
0.00148	0.01751	0.03	0.02142	0.01052	0.01125	0.01844	0.02033	0.0057	-0.02083	-0.0319	-0.0238	-0.02724	-0.05019	-0.0597	-0.03894	-0.01187	0.01163	0.02778	0.02026	-0.00216	-0.03261	-0.05897	-0.0538	-0.0491	-0.05586	-0.0371	-0.02564	-0.03687	-0.03474	-0.02247	-0.00838	0.0123	0.02975	0.03703	0.02337	0.000792344	-0.00725	-0.00965	-0.01189	-0.00991	0.000433704	0.01264	0.0143	-0.00955	-0.04562	-0.05162	-0.02505	0.00361	0.04025
0.00166	0.01754	0.03004	0.02135	0.01031	0.01112	0.0185	0.02041	0.00568	-0.02081	-0.03187	-0.02377	-0.02691	-0.04937	-0.05865	-0.03818	-0.01159	0.01156	0.02751	0.02001	-0.00219	-0.03217	-0.05812	-0.05308	-0.0484	-0.05504	-0.0367	-0.02552	-0.03652	-0.03437	-0.02219	-0.00829	0.01194	0.02904	0.0363	0.02298	0.000824737	-0.00713	-0.00965	-0.01197	-0.00998	0.000208659	0.01226	0.01406	-0.0092	-0.04456	-0.05053	-0.02458	0.00351	0.03952
0.00185	0.01757	0.03009	0.02129	0.01009	0.01098	0.01855	0.02048	0.00566	-0.02079	-0.03184	-0.02375	-0.02658	-0.04854	-0.0576	-0.03741	-0.01131	0.0115	0.02724	0.01976	-0.00221	-0.03173	-0.05728	-0.05236	-0.04771	-0.05422	-0.03631	-0.02538	-0.03618	-0.03399	-0.02191	-0.00821	0.01158	0.02834	0.03557	0.02258	0.00085526	-0.00701	-0.00965	-0.01203	-0.01005	-1.21249e-05	0.01189	0.01382	-0.00886	-0.04351	-0.04946	-0.02411	0.00341	0.03878
0.00203	0.0176	0.03013	0.02122	0.00988	0.01083	0.01859	0.02054	0.00562	-0.02078	-0.03182	-0.02373	-0.02626	-0.04773	-0.05655	-0.03665	-0.01102	0.01144	0.02697	0.01951	-0.00223	-0.0313	-0.05644	-0.05164	-0.04703	-0.0534	-0.03591	-0.02525	-0.03583	-0.03361	-0.02163	-0.00812	0.01122	0.02763	0.03484	0.02218	0.00088384	-0.00688	-0.00963	-0.01209	-0.01012	-0.000228435	0.01151	0.01357	-0.00852	-0.04246	-0.04838	-0.02365	0.0033	0.03804
0.00222	0.01764	0.03018	0.02116	0.00966	0.01068	0.01863	0.0206	0.00558	-0.02078	-0.03181	-0.02372	-0.02595	-0.04691	-0.0555	-0.03589	-0.01074	0.01138	0.0267	0.01926	-0.00226	-0.03086	-0.0556	-0.05093	-0.04634	-0.05258	-0.03551	-0.02511	-0.03548	-0.03323	-0.02135	-0.00804	0.01086	0.02692	0.0341	0.02178	0.000910405	-0.00676	-0.00961	-0.01213	-0.01017	-0.000440059	0.01114	0.01332	-0.00819	-0.04143	-0.04732	-0.02319	0.00319	0.0373
0.0024	0.01767	0.03024	0.0211	0.00944	0.01052	0.01866	0.02065	0.00554	-0.02078	-0.0318	-0.02371	-0.02564	-0.0461	-0.05445	-0.03513	-0.01045	0.01133	0.02644	0.01901	-0.00228	-0.03043	-0.05477	-0.05023	-0.04566	-0.05176	-0.03511	-0.02497	-0.03512	-0.03285	-0.02107	-0.00795	0.0105	0.02621	0.03336	0.02137	0.000934887	-0.00663	-0.00958	-0.01216	-0.01022	-0.000646792	0.01076	0.01307	-0.00787	-0.0404	-0.04626	-0.02273	0.00307	0.03655
0.00259	0.01771	0.03029	0.02105	0.00922	0.01036	0.01868	0.02069	0.00549	-0.0208	-0.0318	-0.02371	-0.02533	-0.04529	-0.05341	-0.03437	-0.01016	0.01128	0.02619	0.01877	-0.0023	-0.03	-0.05395	-0.04953	-0.04498	-0.05094	-0.03471	-0.02482	-0.03476	-0.03246	-0.0208	-0.00786	0.01015	0.02551	0.03262	0.02097	0.000957237	-0.0065	-0.00955	-0.01219	-0.01026	-0.000848468	0.01039	0.01281	-0.00755	-0.03938	-0.04521	-0.02228	0.00295	0.0358
0.00277	0.01775	0.03035	0.02099	0.009	0.01018	0.01869	0.02073	0.00543	-0.02082	-0.03181	-0.02372	-0.02503	-0.04449	-0.05237	-0.03361	-0.00988	0.01123	0.02594	0.01853	-0.00233	-0.02957	-0.05313	-0.04884	-0.0443	-0.05013	-0.03431	-0.02468	-0.0344	-0.03208	-0.02052	-0.00778	0.0098	0.0248	0.03187	0.02055	0.000977409	-0.00636	-0.0095	-0.0122	-0.01029	-0.00104	0.01001	0.01254	-0.00725	-0.03838	-0.04417	-0.02184	0.00282	0.03505
0.00296	0.01779	0.03041	0.02094	0.00878	0.01	0.01869	0.02076	0.00537	-0.02084	-0.03183	-0.02373	-0.02474	-0.04369	-0.05133	-0.03286	-0.00959	0.01119	0.02569	0.01829	-0.00235	-0.02915	-0.05232	-0.04815	-0.04363	-0.04931	-0.03391	-0.02453	-0.03403	-0.03169	-0.02025	-0.00769	0.00945	0.02409	0.03113	0.02014	0.000995357	-0.00623	-0.00944	-0.0122	-0.01031	-0.00124	0.00964	0.01227	-0.00695	-0.03738	-0.04313	-0.02139	0.00269	0.0343
0.00314	0.01783	0.03048	0.02089	0.00855	0.00982	0.01868	0.02078	0.00529	-0.02088	-0.03185	-0.02374	-0.02445	-0.0429	-0.0503	-0.0321	-0.0093	0.01115	0.02545	0.01805	-0.00238	-0.02873	-0.05151	-0.04747	-0.04296	-0.0485	-0.0335	-0.02437	-0.03366	-0.0313	-0.01998	-0.0076	0.00911	0.02339	0.03038	0.01972	0.00101	-0.00609	-0.00938	-0.0122	-0.01032	-0.00142	0.00927	0.012	-0.00666	-0.03639	-0.04211	-0.02096	0.00256	0.03354
0.00332	0.01788	0.03055	0.02084	0.00832	0.00962	0.01866	0.0208	0.00522	-0.02092	-0.03188	-0.02377	-0.02417	-0.04211	-0.04927	-0.03135	-0.00901	0.01112	0.02521	0.01782	-0.0024	-0.02832	-0.05071	-0.0468	-0.04229	-0.04769	-0.0331	-0.02421	-0.03329	-0.03091	-0.0197	-0.00752	0.00876	0.02268	0.02962	0.01929	0.00102	-0.00595	-0.00931	-0.01218	-0.01033	-0.0016	0.0089	0.01172	-0.00638	-0.03542	-0.04109	-0.02053	0.00242	0.03278
0.00351	0.01792	0.03062	0.0208	0.00809	0.00942	0.01864	0.0208	0.00513	-0.02097	-0.03191	-0.02379	-0.02389	-0.04132	-0.04824	-0.0306	-0.00872	0.01109	0.02498	0.01758	-0.00242	-0.0279	-0.04993	-0.04613	-0.04163	-0.04689	-0.03269	-0.02405	-0.03292	-0.03052	-0.01944	-0.00743	0.00842	0.02198	0.02887	0.01887	0.00104	-0.00581	-0.00923	-0.01215	-0.01033	-0.00178	0.00853	0.01144	-0.00611	-0.03446	-0.04008	-0.0201	0.00228	0.03202
0.00369	0.01797	0.03069	0.02075	0.00786	0.00921	0.0186	0.0208	0.00504	-0.02103	-0.03195	-0.02383	-0.02362	-0.04054	-0.04722	-0.02986	-0.00843	0.01106	0.02475	0.01735	-0.00245	-0.0275	-0.04915	-0.04547	-0.04098	-0.04608	-0.03228	-0.02389	-0.03254	-0.03013	-0.01917	-0.00735	0.00809	0.02128	0.02811	0.01844	0.00104	-0.00566	-0.00914	-0.01211	-0.01031	-0.00194	0.00816	0.01116	-0.00585	-0.03351	-0.03909	-0.01968	0.00213	0.03125
0.00388	0.01802	0.03077	0.02071	0.00763	0.009	0.01856	0.0208	0.00495	-0.0211	-0.032	-0.02386	-0.02335	-0.03977	-0.0462	-0.02912	-0.00814	0.01104	0.02453	0.01713	-0.00248	-0.0271	-0.04838	-0.04482	-0.04032	-0.04528	-0.03188	-0.02371	-0.03215	-0.02974	-0.0189	-0.00726	0.00776	0.02058	0.02735	0.018	0.00105	-0.00551	-0.00904	-0.01206	-0.01029	-0.00211	0.0078	0.01087	-0.00559	-0.03257	-0.0381	-0.01926	0.00198	0.03049
0.00406	0.01807	0.03085	0.02068	0.00739	0.00878	0.01851	0.02078	0.00484	-0.02118	-0.03206	-0.0239	-0.02309	-0.039	-0.04519	-0.02839	-0.00786	0.01102	0.02432	0.0169	-0.0025	-0.0267	-0.04762	-0.04418	-0.03968	-0.04449	-0.03147	-0.02354	-0.03177	-0.02935	-0.01864	-0.00717	0.00743	0.01989	0.02659	0.01757	0.00105	-0.00537	-0.00893	-0.012	-0.01027	-0.00226	0.00744	0.01058	-0.00535	-0.03165	-0.03713	-0.01886	0.00182	0.02972
0.00425	0.01812	0.03094	0.02064	0.00716	0.00855	0.01845	0.02076	0.00473	-0.02126	-0.03212	-0.02395	-0.02283	-0.03824	-0.04419	-0.02765	-0.00757	0.011	0.0241	0.01668	-0.00253	-0.02631	-0.04687	-0.04355	-0.03904	-0.04369	-0.03106	-0.02336	-0.03138	-0.02896	-0.01838	-0.00709	0.0071	0.01919	0.02583	0.01713	0.00105	-0.00521	-0.00882	-0.01193	-0.01023	-0.00241	0.00708	0.01029	-0.00511	-0.03074	-0.03617	-0.01845	0.00166	0.02896
0.00443	0.01817	0.03102	0.02061	0.00692	0.00832	0.01837	0.02074	0.00461	-0.02135	-0.03219	-0.024	-0.02258	-0.03748	-0.04319	-0.02693	-0.00728	0.01099	0.0239	0.01646	-0.00256	-0.02593	-0.04613	-0.04292	-0.0384	-0.0429	-0.03065	-0.02318	-0.03098	-0.02857	-0.01812	-0.007	0.00678	0.0185	0.02507	0.01669	0.00105	-0.00506	-0.00869	-0.01184	-0.01018	-0.00255	0.00672	0.00999	-0.00489	-0.02985	-0.03522	-0.01806	0.00149	0.02819
0.00462	0.01823	0.03112	0.02058	0.00669	0.00808	0.01829	0.0207	0.00449	-0.02145	-0.03227	-0.02406	-0.02234	-0.03673	-0.04219	-0.02621	-0.007	0.01098	0.02369	0.01624	-0.00259	-0.02555	-0.0454	-0.04231	-0.03777	-0.04212	-0.03024	-0.02299	-0.03059	-0.02817	-0.01786	-0.00692	0.00647	0.01782	0.0243	0.01624	0.00105	-0.00491	-0.00856	-0.01175	-0.01013	-0.00269	0.00637	0.00969	-0.00467	-0.02897	-0.03428	-0.01767	0.00132	0.02743
0.0048	0.01828	0.03121	0.02055	0.00645	0.00783	0.0182	0.02066	0.00436	-0.02156	-0.03235	-0.02412	-0.0221	-0.03599	-0.04121	-0.02549	-0.00672	0.01098	0.0235	0.01603	-0.00262	-0.02518	-0.04468	-0.0417	-0.03715	-0.04134	-0.02983	-0.0228	-0.03018	-0.02778	-0.01761	-0.00683	0.00616	0.01713	0.02354	0.01579	0.00104	-0.00475	-0.00842	-0.01165	-0.01006	-0.00282	0.00602	0.00939	-0.00447	-0.02811	-0.03336	-0.01729	0.00115	0.02666
0.00499	0.01834	0.03131	0.02053	0.00621	0.00758	0.01811	0.02061	0.00422	-0.02168	-0.03244	-0.02418	-0.02186	-0.03525	-0.04023	-0.02478	-0.00644	0.01097	0.0233	0.01582	-0.00265	-0.02482	-0.04398	-0.04111	-0.03653	-0.04056	-0.02942	-0.0226	-0.02978	-0.02739	-0.01736	-0.00675	0.00585	0.01645	0.02277	0.01534	0.00103	-0.00459	-0.00827	-0.01153	-0.00999	-0.00294	0.00567	0.00909	-0.00427	-0.02726	-0.03245	-0.01692	0.00097068	0.02589
0.00517	0.0184	0.0314	0.02051	0.00598	0.00732	0.018	0.02055	0.00408	-0.0218	-0.03254	-0.02425	-0.02163	-0.03452	-0.03925	-0.02408	-0.00616	0.01098	0.02312	0.01561	-0.00269	-0.02446	-0.04329	-0.04052	-0.03592	-0.03979	-0.029	-0.02239	-0.02937	-0.02699	-0.01711	-0.00666	0.00555	0.01578	0.022	0.01489	0.00102	-0.00443	-0.00811	-0.0114	-0.00991	-0.00306	0.00533	0.00878	-0.00408	-0.02643	-0.03155	-0.01655	0.000787817	0.02513
0.00536	0.01846	0.03151	0.02049	0.00574	0.00706	0.01788	0.02048	0.00393	-0.02194	-0.03264	-0.02432	-0.0214	-0.03379	-0.03829	-0.02338	-0.00588	0.01098	0.02293	0.0154	-0.00273	-0.02411	-0.04261	-0.03994	-0.03531	-0.03903	-0.02859	-0.02218	-0.02896	-0.0266	-0.01687	-0.00658	0.00525	0.0151	0.02124	0.01443	0.00101	-0.00426	-0.00794	-0.01127	-0.00982	-0.00316	0.00499	0.00848	-0.00391	-0.02561	-0.03067	-0.01619	0.000600726	0.02436
0.00554	0.01852	0.03161	0.02048	0.0055	0.00679	0.01776	0.02041	0.00377	-0.02208	-0.03275	-0.02439	-0.02118	-0.03307	-0.03733	-0.02269	-0.00561	0.01098	0.02276	0.01519	-0.00277	-0.02377	-0.04194	-0.03938	-0.03471	-0.03827	-0.02818	-0.02197	-0.02855	-0.02621	-0.01663	-0.00649	0.00496	0.01444	0.02047	0.01397	0.000988852	-0.0041	-0.00777	-0.01112	-0.00973	-0.00327	0.00466	0.00817	-0.00374	-0.02481	-0.0298	-0.01584	0.000409444	0.0236
0.00573	0.01859	0.03172	0.02047	0.00527	0.00651	0.01763	0.02033	0.0036	-0.02223	-0.03286	-0.02447	-0.02096	-0.03236	-0.03637	-0.022	-0.00534	0.01099	0.02258	0.01499	-0.00281	-0.02344	-0.04129	-0.03882	-0.03412	-0.03752	-0.02776	-0.02175	-0.02813	-0.02581	-0.01639	-0.00641	0.00468	0.01377	0.0197	0.01351	0.000968562	-0.00393	-0.00758	-0.01096	-0.00962	-0.00336	0.00433	0.00786	-0.00358	-0.02403	-0.02895	-0.01549	0.000214004	0.02283
0.00591	0.01865	0.03183	0.02046	0.00503	0.00623	0.01748	0.02024	0.00343	-0.02239	-0.03298	-0.02455	-0.02074	-0.03165	-0.03543	-0.02133	-0.00507	0.011	0.02241	0.01479	-0.00285	-0.02311	-0.04065	-0.03828	-0.03353	-0.03677	-0.02735	-0.02153	-0.02771	-0.02542	-0.01615	-0.00632	0.0044	0.01311	0.01893	0.01304	0.000945483	-0.00377	-0.00739	-0.0108	-0.00951	-0.00345	0.00401	0.00755	-0.00344	-0.02327	-0.02812	-0.01516	1.44423e-05	0.02207
0.0061	0.01872	0.03195	0.02045	0.0048	0.00595	0.01733	0.02015	0.00325	-0.02256	-0.03311	-0.02463	-0.02053	-0.03095	-0.03449	-0.02065	-0.00481	0.01102	0.02225	0.01459	-0.00289	-0.0228	-0.04003	-0.03774	-0.03295	-0.03602	-0.02693	-0.02129	-0.02728	-0.02503	-0.01592	-0.00624	0.00412	0.01246	0.01817	0.01257	0.000919591	-0.0036	-0.00719	-0.01062	-0.00938	-0.00353	0.00369	0.00724	-0.0033	-0.02252	-0.0273	-0.01483	-0.000189206	0.02131
0.00628	0.01878	0.03206	0.02045	0.00456	0.00566	0.01717	0.02005	0.00307	-0.02273	-0.03324	-0.02472	-0.02032	-0.03026	-0.03356	-0.01999	-0.00455	0.01103	0.02209	0.01439	-0.00294	-0.02249	-0.03942	-0.03722	-0.03238	-0.03529	-0.02651	-0.02106	-0.02685	-0.02464	-0.01569	-0.00615	0.00385	0.01181	0.0174	0.0121	0.00089086	-0.00343	-0.00699	-0.01043	-0.00925	-0.0036	0.00337	0.00692	-0.00317	-0.02179	-0.02649	-0.01451	-0.000396906	0.02055
0.00646	0.01885	0.03218	0.02045	0.00433	0.00536	0.017	0.01994	0.00288	-0.02292	-0.03338	-0.02481	-0.02011	-0.02957	-0.03264	-0.01934	-0.00429	0.01105	0.02194	0.0142	-0.00299	-0.02219	-0.03882	-0.03671	-0.03182	-0.03456	-0.02609	-0.02082	-0.02642	-0.02425	-0.01546	-0.00607	0.00359	0.01117	0.01663	0.01163	0.000859271	-0.00326	-0.00677	-0.01023	-0.00911	-0.00367	0.00306	0.00661	-0.00305	-0.02108	-0.0257	-0.0142	-0.000608615	0.0198
0.00665	0.01892	0.0323	0.02046	0.0041	0.00506	0.01683	0.01982	0.00268	-0.02311	-0.03352	-0.0249	-0.01991	-0.02888	-0.03173	-0.01869	-0.00403	0.01107	0.02179	0.014	-0.00304	-0.02191	-0.03824	-0.03621	-0.03126	-0.03383	-0.02568	-0.02057	-0.02598	-0.02386	-0.01524	-0.00599	0.00333	0.01053	0.01587	0.01116	0.000824826	-0.00309	-0.00655	-0.01002	-0.00897	-0.00373	0.00276	0.0063	-0.00295	-0.02039	-0.02493	-0.0139	-0.00082427	0.01904
0.00683	0.01899	0.03243	0.02047	0.00387	0.00476	0.01664	0.0197	0.00247	-0.02331	-0.03367	-0.02499	-0.01971	-0.02821	-0.03082	-0.01805	-0.00379	0.01109	0.02164	0.01381	-0.0031	-0.02163	-0.03768	-0.03572	-0.03071	-0.03311	-0.02526	-0.02031	-0.02554	-0.02347	-0.01502	-0.0059	0.00308	0.0099	0.01511	0.01068	0.000787534	-0.00291	-0.00632	-0.00981	-0.00881	-0.00378	0.00246	0.00598	-0.00285	-0.01971	-0.02418	-0.0136	-0.00104	0.01829
0.00702	0.01907	0.03256	0.02048	0.00364	0.00445	0.01645	0.01957	0.00226	-0.02351	-0.03383	-0.02508	-0.01952	-0.02753	-0.02993	-0.01742	-0.00354	0.01111	0.0215	0.01362	-0.00316	-0.02136	-0.03713	-0.03525	-0.03017	-0.0324	-0.02484	-0.02005	-0.0251	-0.02308	-0.01481	-0.00582	0.00284	0.00927	0.01434	0.0102	0.000747404	-0.00274	-0.00609	-0.00958	-0.00865	-0.00383	0.00216	0.00567	-0.00276	-0.01906	-0.02344	-0.01332	-0.00127	0.01754
0.0072	0.01914	0.03269	0.0205	0.00341	0.00414	0.01625	0.01943	0.00204	-0.02373	-0.03398	-0.02517	-0.01932	-0.02687	-0.02904	-0.01679	-0.0033	0.01114	0.02136	0.01343	-0.00322	-0.0211	-0.03659	-0.03478	-0.02963	-0.0317	-0.02442	-0.01978	-0.02465	-0.02269	-0.0146	-0.00574	0.0026	0.00865	0.01358	0.00972	0.000704443	-0.00256	-0.00584	-0.00935	-0.00848	-0.00386	0.00187	0.00536	-0.00268	-0.01842	-0.02272	-0.01304	-0.00149	0.0168
0.00739	0.01921	0.03282	0.02052	0.00319	0.00383	0.01604	0.01929	0.00182	-0.02395	-0.03415	-0.02526	-0.01913	-0.02621	-0.02816	-0.01618	-0.00306	0.01116	0.02122	0.01324	-0.00329	-0.02086	-0.03607	-0.03433	-0.0291	-0.031	-0.024	-0.01951	-0.0242	-0.02231	-0.01439	-0.00565	0.00237	0.00804	0.01282	0.00923	0.000658662	-0.00239	-0.00559	-0.0091	-0.0083	-0.0039	0.00159	0.00504	-0.00262	-0.01781	-0.02202	-0.01277	-0.00172	0.01606
0.00757	0.01929	0.03295	0.02054	0.00297	0.00351	0.01583	0.01914	0.00159	-0.02418	-0.03431	-0.02536	-0.01893	-0.02555	-0.02728	-0.01557	-0.00283	0.01119	0.02109	0.01306	-0.00336	-0.02062	-0.03557	-0.03388	-0.02858	-0.03031	-0.02357	-0.01923	-0.02375	-0.02192	-0.01418	-0.00557	0.00214	0.00743	0.01206	0.00875	0.000610067	-0.00221	-0.00534	-0.00885	-0.00812	-0.00392	0.00131	0.00473	-0.00256	-0.01721	-0.02133	-0.01252	-0.00196	0.01532
0.00776	0.01936	0.03309	0.02056	0.00275	0.00319	0.01561	0.01898	0.00135	-0.02442	-0.03448	-0.02545	-0.01874	-0.0249	-0.02642	-0.01497	-0.00261	0.01121	0.02096	0.01287	-0.00343	-0.02039	-0.03508	-0.03345	-0.02807	-0.02962	-0.02315	-0.01894	-0.02329	-0.02154	-0.01398	-0.00549	0.00192	0.00683	0.01131	0.00826	0.000558668	-0.00203	-0.00508	-0.00859	-0.00793	-0.00394	0.00104	0.00442	-0.00251	-0.01663	-0.02066	-0.01227	-0.0022	0.01458
0.00794	0.01944	0.03323	0.02059	0.00253	0.00287	0.01538	0.01882	0.00111	-0.02467	-0.03466	-0.02554	-0.01855	-0.02426	-0.02556	-0.01438	-0.00238	0.01124	0.02084	0.01269	-0.00351	-0.02018	-0.03461	-0.03303	-0.02756	-0.02895	-0.02273	-0.01865	-0.02283	-0.02115	-0.01379	-0.00541	0.00171	0.00623	0.01055	0.00778	0.000504472	-0.00186	-0.00481	-0.00831	-0.00773	-0.00395	0.000779101	0.00411	-0.00247	-0.01607	-0.02001	-0.01202	-0.00244	0.01385
0.00813	0.01951	0.03337	0.02063	0.00232	0.00254	0.01514	0.01865	0.000864666	-0.02492	-0.03484	-0.02563	-0.01836	-0.02362	-0.02471	-0.0138	-0.00217	0.01127	0.02072	0.01251	-0.00359	-0.01997	-0.03416	-0.03262	-0.02706	-0.02828	-0.02231	-0.01835	-0.02237	-0.02077	-0.01359	-0.00533	0.0015	0.00565	0.0098	0.00729	0.000447489	-0.00168	-0.00453	-0.00804	-0.00752	-0.00395	0.000520454	0.0038	-0.00244	-0.01554	-0.01938	-0.01179	-0.00268	0.01313
0.00831	0.01959	0.03351	0.02066	0.00211	0.00222	0.0149	0.01848	0.000611305	-0.02518	-0.03502	-0.02572	-0.01817	-0.02298	-0.02387	-0.01323	-0.00196	0.01129	0.0206	0.01232	-0.00367	-0.01978	-0.03372	-0.03223	-0.02657	-0.02761	-0.02188	-0.01805	-0.02191	-0.02039	-0.01341	-0.00525	0.0013	0.00507	0.00905	0.0068	0.000387728	-0.0015	-0.00426	-0.00775	-0.00731	-0.00395	0.000268042	0.00349	-0.00242	-0.01502	-0.01877	-0.01157	-0.00293	0.0124
0.0085	0.01967	0.03365	0.0207	0.0019	0.00189	0.01465	0.0183	0.000352331	-0.02544	-0.0352	-0.02581	-0.01798	-0.02235	-0.02304	-0.01267	-0.00175	0.01132	0.02048	0.01214	-0.00376	-0.0196	-0.0333	-0.03184	-0.02608	-0.02695	-0.02146	-0.01773	-0.02144	-0.02002	-0.01322	-0.00517	0.00111	0.00449	0.0083	0.0063	0.000325206	-0.00132	-0.00397	-0.00746	-0.00709	-0.00394	2.19493e-05	0.00318	-0.00241	-0.01452	-0.01817	-0.01136	-0.00318	0.01168
0.00868	0.01975	0.0338	0.02075	0.0017	0.00156	0.0144	0.01811	8.79042e-05	-0.02571	-0.03539	-0.0259	-0.0178	-0.02172	-0.02221	-0.01211	-0.00155	0.01135	0.02037	0.01196	-0.00385	-0.01943	-0.03289	-0.03147	-0.02561	-0.02631	-0.02103	-0.01742	-0.02096	-0.01964	-0.01304	-0.00509	0.000918293	0.00393	0.00756	0.00581	0.000259986	-0.00114	-0.00368	-0.00716	-0.00687	-0.00393	-0.00021782	0.00288	-0.0024	-0.01404	-0.0176	-0.01115	-0.00344	0.01097
0.00887	0.01983	0.03394	0.0208	0.0015	0.00123	0.01414	0.01792	-0.000181802	-0.02599	-0.03558	-0.02598	-0.0176	-0.0211	-0.02139	-0.01157	-0.00136	0.01137	0.02026	0.01178	-0.00395	-0.01927	-0.03251	-0.03111	-0.02514	-0.02566	-0.02061	-0.01709	-0.02049	-0.01927	-0.01286	-0.00501	0.000737872	0.00337	0.00682	0.00532	0.000192142	-0.000965911	-0.00339	-0.00685	-0.00664	-0.00391	-0.000451283	0.00258	-0.00241	-0.01358	-0.01704	-0.01096	-0.00369	0.01026
0.00905	0.01991	0.03409	0.02085	0.0013	0.000894675	0.01387	0.01772	-0.000456615	-0.02627	-0.03577	-0.02607	-0.01741	-0.02048	-0.02058	-0.01103	-0.00117	0.0114	0.02015	0.0116	-0.00405	-0.01912	-0.03213	-0.03075	-0.02467	-0.02503	-0.02018	-0.01676	-0.02001	-0.01889	-0.01269	-0.00493	0.00056408	0.00282	0.00608	0.00482	0.000121746	-0.000788051	-0.00309	-0.00653	-0.0064	-0.00388	-0.000678457	0.00228	-0.00243	-0.01314	-0.0165	-0.01077	-0.00395	0.00956
0.00924	0.01998	0.03424	0.0209	0.00111	0.000563076	0.0136	0.01751	-0.000736361	-0.02656	-0.03597	-0.02615	-0.01722	-0.01986	-0.01978	-0.0105	-0.000992173	0.01142	0.02004	0.01142	-0.00416	-0.01898	-0.03178	-0.03041	-0.02422	-0.0244	-0.01975	-0.01642	-0.01953	-0.01852	-0.01252	-0.00485	0.000396913	0.00227	0.00535	0.00433	4.88717e-05	-0.000610462	-0.00278	-0.00621	-0.00616	-0.00385	-0.000899359	0.00198	-0.00245	-0.01272	-0.01598	-0.0106	-0.00422	0.00886
0.00942	0.02006	0.03439	0.02096	0.000922033	0.000231569	0.01332	0.01731	-0.00102	-0.02686	-0.03616	-0.02622	-0.01703	-0.01925	-0.01899	-0.00998	-0.000817147	0.01145	0.01993	0.01124	-0.00427	-0.01886	-0.03144	-0.03008	-0.02377	-0.02378	-0.01933	-0.01608	-0.01904	-0.01815	-0.01235	-0.00477	0.000236371	0.00174	0.00462	0.00383	-2.64088e-05	-0.000433242	-0.00248	-0.00588	-0.00591	-0.00381	-0.00111	0.00168	-0.00248	-0.01232	-0.01547	-0.01043	-0.00448	0.00816
0.0096	0.02014	0.03454	0.02102	0.000739611	-9.95025e-05	0.01304	0.01709	-0.00131	-0.02716	-0.03636	-0.0263	-0.01683	-0.01864	-0.0182	-0.00947	-0.000648317	0.01147	0.01982	0.01106	-0.00438	-0.01875	-0.03111	-0.02976	-0.02333	-0.02317	-0.0189	-0.01573	-0.01856	-0.01778	-0.01219	-0.0047	8.24518e-05	0.00121	0.00389	0.00334	-0.000104022	-0.000256486	-0.00216	-0.00555	-0.00566	-0.00377	-0.00132	0.00138	-0.00253	-0.01194	-0.01499	-0.01027	-0.00475	0.00747
0.00979	0.02022	0.0347	0.02108	0.000561991	-0.000429795	0.01276	0.01687	-0.0016	-0.02746	-0.03656	-0.02637	-0.01663	-0.01803	-0.01741	-0.00896	-0.000485768	0.01149	0.01972	0.01087	-0.0045	-0.01865	-0.0308	-0.02946	-0.02289	-0.02256	-0.01847	-0.01537	-0.01807	-0.01742	-0.01204	-0.00462	-6.48476e-05	0.000691718	0.00317	0.00284	-0.000183896	-8.02922e-05	-0.00185	-0.00521	-0.0054	-0.00372	-0.00152	0.00109	-0.00258	-0.01157	-0.01452	-0.01012	-0.00502	0.00679
0.00997	0.0203	0.03485	0.02115	0.000389374	-0.000758966	0.01247	0.01665	-0.0019	-0.02777	-0.03676	-0.02643	-0.01643	-0.01742	-0.01664	-0.00847	-0.000329583	0.01151	0.01962	0.01069	-0.00463	-0.01856	-0.03051	-0.02916	-0.02246	-0.02196	-0.01804	-0.01501	-0.01757	-0.01705	-0.01188	-0.00454	-0.000205529	0.000180478	0.00245	0.00235	-0.000265957	9.52436e-05	-0.00153	-0.00486	-0.00514	-0.00366	-0.00172	0.000802799	-0.00264	-0.01123	-0.01408	-0.00998	-0.00529	0.00611
0.01016	0.02038	0.035	0.02122	0.00022196	-0.00109	0.01218	0.01642	-0.0022	-0.02809	-0.03696	-0.0265	-0.01623	-0.01682	-0.01587	-0.00798	-0.000179844	0.01152	0.01951	0.01051	-0.00476	-0.01848	-0.03024	-0.02887	-0.02204	-0.02137	-0.01762	-0.01464	-0.01708	-0.01669	-0.01173	-0.00447	-0.000339593	-0.000322479	0.00174	0.00186	-0.000350131	0.000270024	-0.00121	-0.00451	-0.00487	-0.0036	-0.00191	0.000515692	-0.0027	-0.01091	-0.01365	-0.00985	-0.00557	0.00544
0.01034	0.02046	0.03516	0.0213	5.99484e-05	-0.00141	0.01188	0.01619	-0.00251	-0.02841	-0.03715	-0.02655	-0.01602	-0.01622	-0.01511	-0.0075	-3.66351e-05	0.01154	0.01941	0.01032	-0.00489	-0.01841	-0.02997	-0.02859	-0.02162	-0.02078	-0.01719	-0.01426	-0.01658	-0.01633	-0.01159	-0.00439	-0.000467043	-0.000817036	0.00103	0.00136	-0.000436347	0.000443954	-0.000885692	-0.00416	-0.0046	-0.00354	-0.00209	0.000231318	-0.00278	-0.01061	-0.01324	-0.00973	-0.00585	0.00477
0.01053	0.02054	0.03531	0.02137	-9.64746e-05	-0.00174	0.01159	0.01595	-0.00282	-0.02873	-0.03735	-0.0266	-0.01581	-0.01562	-0.01435	-0.00703	9.99817e-05	0.01155	0.01931	0.01014	-0.00503	-0.01836	-0.02973	-0.02832	-0.02121	-0.02021	-0.01676	-0.01388	-0.01608	-0.01598	-0.01145	-0.00432	-0.000587889	-0.0013	0.000322985	0.000869667	-0.000524521	0.000616939	-0.000559189	-0.0038	-0.00433	-0.00347	-0.00227	-5.02263e-05	-0.00286	-0.01032	-0.01285	-0.00962	-0.00613	0.00411
0.01071	0.02062	0.03547	0.02146	-0.000247182	-0.00206	0.01128	0.01571	-0.00313	-0.02905	-0.03755	-0.02665	-0.0156	-0.01502	-0.0136	-0.00657	0.000230026	0.01156	0.01921	0.00995	-0.00518	-0.01832	-0.0295	-0.02806	-0.0208	-0.01964	-0.01633	-0.01349	-0.01558	-0.01562	-0.01131	-0.00424	-0.000702171	-0.00178	-0.000375239	0.000378316	-0.000614526	0.000788911	-0.000230464	-0.00344	-0.00405	-0.0034	-0.00244	-0.000328907	-0.00295	-0.01006	-0.01247	-0.00951	-0.00641	0.00346
0.0109	0.0207	0.03562	0.02154	-0.000392061	-0.00238	0.01098	0.01547	-0.00345	-0.02938	-0.03775	-0.02669	-0.01538	-0.01442	-0.01285	-0.00612	0.000353538	0.01156	0.0191	0.00976	-0.00533	-0.01828	-0.02929	-0.02781	-0.0204	-0.01907	-0.0159	-0.0131	-0.01508	-0.01527	-0.01117	-0.00417	-0.00080994	-0.00225	-0.00107	-0.000111655	-0.000706226	0.000959803	0.000100217	-0.00307	-0.00377	-0.00332	-0.00261	-0.000604711	-0.00305	-0.00981	-0.01212	-0.00942	-0.00669	0.00281
0.01108	0.02078	0.03578	0.02163	-0.000531	-0.00269	0.01067	0.01522	-0.00377	-0.02972	-0.03794	-0.02673	-0.01516	-0.01382	-0.01211	-0.00567	0.000470558	0.01157	0.019	0.00957	-0.00548	-0.01826	-0.02909	-0.02757	-0.02001	-0.01852	-0.01548	-0.0127	-0.01457	-0.01492	-0.01104	-0.0041	-0.000911244	-0.00271	-0.00175	-0.000599985	-0.000799485	0.00113	0.000432591	-0.0027	-0.00348	-0.00324	-0.00277	-0.000877622	-0.00316	-0.00958	-0.01178	-0.00933	-0.00697	0.00217
0.01127	0.02086	0.03593	0.02172	-0.000663886	-0.003	0.01037	0.01497	-0.00409	-0.03005	-0.03814	-0.02676	-0.01493	-0.01323	-0.01137	-0.00523	0.000581127	0.01157	0.0189	0.00938	-0.00564	-0.01826	-0.0289	-0.02734	-0.01962	-0.01797	-0.01505	-0.0123	-0.01406	-0.01457	-0.01092	-0.00403	-0.00101	-0.00316	-0.00244	-0.00109	-0.000894165	0.0013	0.000766392	-0.00232	-0.0032	-0.00315	-0.00292	-0.00115	-0.00327	-0.00937	-0.01146	-0.00925	-0.00726	0.00153
0.01145	0.02093	0.03608	0.02181	-0.000790607	-0.00331	0.01006	0.01472	-0.00441	-0.03039	-0.03833	-0.02678	-0.0147	-0.01263	-0.01064	-0.0048	0.000685284	0.01157	0.01879	0.00919	-0.00581	-0.01826	-0.02873	-0.02711	-0.01924	-0.01743	-0.01462	-0.01189	-0.01355	-0.01422	-0.0108	-0.00395	-0.00109	-0.0036	-0.00311	-0.00157	-0.000990131	0.00147	0.0011	-0.00194	-0.00291	-0.00306	-0.00307	-0.00141	-0.0034	-0.00918	-0.01116	-0.00918	-0.00755	0.000902576
0.01164	0.02101	0.03624	0.02191	-0.00091105	-0.00362	0.00975	0.01446	-0.00474	-0.03073	-0.03852	-0.0268	-0.01446	-0.01203	-0.00991	-0.00437	0.00078307	0.01156	0.01869	0.00899	-0.00597	-0.01827	-0.02858	-0.0269	-0.01886	-0.01689	-0.0142	-0.01148	-0.01304	-0.01388	-0.01068	-0.00388	-0.00118	-0.00404	-0.00378	-0.00205	-0.00109	0.00163	0.00144	-0.00156	-0.00261	-0.00297	-0.00321	-0.00168	-0.00352	-0.00901	-0.01087	-0.00912	-0.00784	0.000280638
0.01182	0.02109	0.03639	0.02201	-0.00103	-0.00392	0.00943	0.0142	-0.00507	-0.03107	-0.03871	-0.02681	-0.01422	-0.01143	-0.00919	-0.00395	0.000874526	0.01155	0.01858	0.0088	-0.00615	-0.0183	-0.02844	-0.02669	-0.01849	-0.01636	-0.01377	-0.01106	-0.01253	-0.01354	-0.01056	-0.00381	-0.00125	-0.00446	-0.00444	-0.00253	-0.00119	0.0018	0.00177	-0.00118	-0.00232	-0.00287	-0.00335	-0.00194	-0.00366	-0.00886	-0.01061	-0.00907	-0.00813	-0.000334514
0.01201	0.02116	0.03654	0.02211	-0.00113	-0.00421	0.00912	0.01394	-0.0054	-0.03141	-0.03889	-0.02682	-0.01397	-0.01083	-0.00847	-0.00354	0.00095969	0.01154	0.01847	0.0086	-0.00633	-0.01833	-0.02831	-0.02649	-0.01812	-0.01584	-0.01335	-0.01064	-0.01202	-0.0132	-0.01045	-0.00374	-0.00132	-0.00487	-0.00509	-0.00301	-0.00128	0.00196	0.00211	-0.000796627	-0.00202	-0.00277	-0.00348	-0.0022	-0.0038	-0.00872	-0.01036	-0.00903	-0.00842	-0.000942777
0.01219	0.02123	0.03669	0.02221	-0.00123	-0.00451	0.00881	0.01367	-0.00573	-0.03175	-0.03908	-0.02681	-0.01372	-0.01024	-0.00776	-0.00314	0.00104	0.01152	0.01836	0.0084	-0.00651	-0.01838	-0.02819	-0.0263	-0.01776	-0.01533	-0.01292	-0.01021	-0.01151	-0.01286	-0.01034	-0.00368	-0.00139	-0.00528	-0.00574	-0.00348	-0.00138	0.00212	0.00245	-0.000410236	-0.00172	-0.00267	-0.00361	-0.00245	-0.00395	-0.0086	-0.01012	-0.00899	-0.00871	-0.00154
0.01238	0.02131	0.03685	0.02232	-0.00133	-0.00479	0.00849	0.01341	-0.00607	-0.0321	-0.03926	-0.0268	-0.01346	-0.00963	-0.00704	-0.00274	0.00111	0.01151	0.01825	0.00819	-0.0067	-0.01843	-0.02809	-0.02611	-0.0174	-0.01482	-0.0125	-0.00978	-0.01099	-0.01253	-0.01024	-0.00361	-0.00144	-0.00567	-0.00638	-0.00395	-0.00148	0.00228	0.00278	-2.24304e-05	-0.00142	-0.00256	-0.00373	-0.00271	-0.00411	-0.0085	-0.00991	-0.00896	-0.009	-0.00214
0.01256	0.02138	0.03699	0.02243	-0.00142	-0.00507	0.00818	0.01314	-0.0064	-0.03244	-0.03943	-0.02679	-0.01319	-0.00903	-0.00633	-0.00234	0.00118	0.01148	0.01814	0.00799	-0.0069	-0.0185	-0.028	-0.02593	-0.01705	-0.01432	-0.01208	-0.00935	-0.01048	-0.0122	-0.01014	-0.00354	-0.00149	-0.00606	-0.00701	-0.00442	-0.00159	0.00244	0.00312	0.000366477	-0.00112	-0.00245	-0.00385	-0.00296	-0.00427	-0.00842	-0.00971	-0.00894	-0.00929	-0.00273
0.01274	0.02145	0.03714	0.02254	-0.0015	-0.00535	0.00787	0.01287	-0.00674	-0.03279	-0.0396	-0.02676	-0.01292	-0.00843	-0.00563	-0.00195	0.00124	0.01145	0.01802	0.00778	-0.0071	-0.01857	-0.02793	-0.02576	-0.0167	-0.01383	-0.01166	-0.00891	-0.00996	-0.01187	-0.01004	-0.00347	-0.00154	-0.00644	-0.00764	-0.00488	-0.00169	0.00259	0.00346	0.000756178	-0.00081335	-0.00234	-0.00397	-0.0032	-0.00444	-0.00835	-0.00953	-0.00893	-0.00958	-0.0033
0.01293	0.02152	0.03729	0.02265	-0.00157	-0.00562	0.00756	0.0126	-0.00707	-0.03313	-0.03977	-0.02673	-0.01264	-0.00782	-0.00492	-0.00157	0.00129	0.01142	0.0179	0.00757	-0.0073	-0.01866	-0.02786	-0.02559	-0.01635	-0.01334	-0.01124	-0.00847	-0.00944	-0.01154	-0.00994	-0.00341	-0.00158	-0.00681	-0.00825	-0.00534	-0.00179	0.00275	0.00379	0.00115	-0.000509354	-0.00223	-0.00407	-0.00344	-0.00462	-0.0083	-0.00936	-0.00892	-0.00988	-0.00388
0.01311	0.02158	0.03743	0.02277	-0.00164	-0.00588	0.00725	0.01232	-0.00741	-0.03347	-0.03993	-0.02669	-0.01236	-0.00721	-0.00422	-0.00119	0.00134	0.01139	0.01778	0.00736	-0.00751	-0.01875	-0.02781	-0.02543	-0.01601	-0.01286	-0.01082	-0.00803	-0.00893	-0.01122	-0.00985	-0.00334	-0.00161	-0.00716	-0.00886	-0.00579	-0.00189	0.0029	0.00413	0.00154	-0.000204845	-0.00211	-0.00418	-0.00369	-0.0048	-0.00827	-0.00921	-0.00893	-0.01017	-0.00444
0.0133	0.02165	0.03758	0.02289	-0.0017	-0.00614	0.00694	0.01205	-0.00775	-0.03381	-0.04009	-0.02664	-0.01207	-0.0066	-0.00352	-0.000821063	0.00139	0.01135	0.01766	0.00715	-0.00772	-0.01886	-0.02777	-0.02527	-0.01567	-0.01239	-0.01041	-0.00758	-0.00841	-0.0109	-0.00976	-0.00328	-0.00164	-0.00751	-0.00946	-0.00624	-0.00199	0.00305	0.00446	0.00193	9.99159e-05	-0.002	-0.00428	-0.00392	-0.00499	-0.00825	-0.00907	-0.00894	-0.01046	-0.005
0.01348	0.02172	0.03772	0.02301	-0.00175	-0.00639	0.00663	0.01177	-0.00808	-0.03415	-0.04024	-0.02658	-0.01177	-0.00599	-0.00282	-0.000452803	0.00142	0.01131	0.01753	0.00693	-0.00794	-0.01897	-0.02774	-0.02512	-0.01533	-0.01192	-0.01	-0.00713	-0.0079	-0.01058	-0.00968	-0.00321	-0.00166	-0.00785	-0.01004	-0.00668	-0.00209	0.0032	0.00479	0.00232	0.00040467	-0.00188	-0.00438	-0.00416	-0.00519	-0.00825	-0.00895	-0.00895	-0.01076	-0.00555
0.01367	0.02178	0.03786	0.02313	-0.0018	-0.00664	0.00632	0.0115	-0.00842	-0.03449	-0.04039	-0.02651	-0.01146	-0.00538	-0.00212	-8.88422e-05	0.00146	0.01126	0.0174	0.00671	-0.00816	-0.01909	-0.02773	-0.02498	-0.015	-0.01146	-0.00959	-0.00668	-0.00738	-0.01026	-0.0096	-0.00315	-0.00168	-0.00818	-0.01062	-0.00712	-0.00219	0.00335	0.00512	0.00271	0.000709159	-0.00176	-0.00447	-0.00439	-0.00539	-0.00826	-0.00885	-0.00898	-0.01105	-0.00609
0.01385	0.02184	0.03799	0.02325	-0.00184	-0.00688	0.00602	0.01122	-0.00875	-0.03482	-0.04053	-0.02644	-0.01115	-0.00476	-0.00143	0.000271093	0.00149	0.01121	0.01727	0.00649	-0.00838	-0.01922	-0.02772	-0.02484	-0.01467	-0.01101	-0.00918	-0.00623	-0.00687	-0.00995	-0.00952	-0.00309	-0.00169	-0.00849	-0.01119	-0.00755	-0.00229	0.0035	0.00544	0.00309	0.00101	-0.00164	-0.00456	-0.00462	-0.00559	-0.00829	-0.00876	-0.00901	-0.01134	-0.00663
0.01404	0.0219	0.03813	0.02337	-0.00187	-0.00711	0.00571	0.01095	-0.00909	-0.03516	-0.04067	-0.02636	-0.01083	-0.00414	-0.000731138	0.000627277	0.00151	0.01115	0.01713	0.00626	-0.00861	-0.01936	-0.02772	-0.0247	-0.01434	-0.01056	-0.00878	-0.00578	-0.00636	-0.00964	-0.00944	-0.00303	-0.0017	-0.0088	-0.01175	-0.00798	-0.00239	0.00364	0.00577	0.00348	0.00132	-0.00152	-0.00464	-0.00485	-0.00581	-0.00833	-0.00869	-0.00905	-0.01163	-0.00715
0.01422	0.02196	0.03826	0.0235	-0.00189	-0.00733	0.00541	0.01067	-0.00942	-0.03549	-0.0408	-0.02627	-0.01051	-0.00351	-3.6943e-05	0.000979983	0.00153	0.01109	0.01699	0.00604	-0.00884	-0.01951	-0.02773	-0.02457	-0.01402	-0.01012	-0.00837	-0.00533	-0.00584	-0.00933	-0.00937	-0.00296	-0.0017	-0.0091	-0.0123	-0.00839	-0.00249	0.00378	0.00609	0.00387	0.00162	-0.0014	-0.00473	-0.00507	-0.00602	-0.00839	-0.00863	-0.00909	-0.01192	-0.00767
0.01441	0.02202	0.03839	0.02363	-0.00191	-0.00755	0.00512	0.0104	-0.00975	-0.03581	-0.04092	-0.02617	-0.01017	-0.00289	0.000656736	0.00133	0.00154	0.01103	0.01685	0.00581	-0.00908	-0.01966	-0.02775	-0.02444	-0.0137	-0.00969	-0.00798	-0.00487	-0.00534	-0.00903	-0.0093	-0.0029	-0.00169	-0.00939	-0.01284	-0.00881	-0.00258	0.00392	0.00641	0.00425	0.00192	-0.00128	-0.0048	-0.00529	-0.00624	-0.00846	-0.00858	-0.00914	-0.01221	-0.00818
0.01459	0.02207	0.03852	0.02375	-0.00192	-0.00776	0.00482	0.01012	-0.01008	-0.03613	-0.04103	-0.02606	-0.00983	-0.00226	0.00135	0.00168	0.00155	0.01096	0.01671	0.00558	-0.00931	-0.01982	-0.02778	-0.02431	-0.01338	-0.00926	-0.00758	-0.00442	-0.00483	-0.00872	-0.00923	-0.00284	-0.00168	-0.00967	-0.01337	-0.00921	-0.00268	0.00406	0.00673	0.00463	0.00222	-0.00116	-0.00488	-0.00551	-0.00647	-0.00855	-0.00855	-0.0092	-0.0125	-0.00869
0.01478	0.02213	0.03864	0.02388	-0.00193	-0.00796	0.00453	0.00985	-0.01041	-0.03645	-0.04114	-0.02594	-0.00949	-0.00162	0.00204	0.00202	0.00156	0.01089	0.01656	0.00534	-0.00956	-0.01999	-0.02782	-0.02419	-0.01306	-0.00884	-0.00719	-0.00396	-0.00432	-0.00843	-0.00916	-0.00278	-0.00167	-0.00993	-0.01389	-0.00961	-0.00277	0.0042	0.00704	0.00501	0.00252	-0.00103	-0.00495	-0.00573	-0.0067	-0.00865	-0.00853	-0.00926	-0.01278	-0.00918
0.01496	0.02218	0.03876	0.02401	-0.00193	-0.00816	0.00425	0.00958	-0.01073	-0.03676	-0.04124	-0.02581	-0.00913	-0.000986076	0.00274	0.00236	0.00156	0.01081	0.0164	0.00511	-0.0098	-0.02017	-0.02786	-0.02407	-0.01274	-0.00843	-0.0068	-0.00351	-0.00382	-0.00813	-0.0091	-0.00273	-0.00164	-0.01019	-0.0144	-0.01	-0.00286	0.00433	0.00735	0.00538	0.00281	-0.000911254	-0.00503	-0.00594	-0.00694	-0.00876	-0.00853	-0.00933	-0.01307	-0.00967
0.01515	0.02223	0.03888	0.02414	-0.00192	-0.00834	0.00396	0.00931	-0.01105	-0.03707	-0.04134	-0.02568	-0.00877	-0.000345678	0.00343	0.0027	0.00156	0.01073	0.01625	0.00487	-0.01005	-0.02035	-0.02792	-0.02395	-0.01243	-0.00802	-0.00642	-0.00305	-0.00332	-0.00784	-0.00903	-0.00267	-0.00162	-0.01044	-0.01489	-0.01039	-0.00295	0.00447	0.00766	0.00575	0.0031	-0.00078985	-0.00509	-0.00616	-0.00718	-0.00889	-0.00854	-0.00941	-0.01335	-0.01015
0.01533	0.02227	0.039	0.02427	-0.00191	-0.00852	0.00369	0.00904	-0.01137	-0.03737	-0.04142	-0.02553	-0.0084	0.000297947	0.00412	0.00304	0.00155	0.01065	0.01609	0.00462	-0.01029	-0.02053	-0.02798	-0.02383	-0.01212	-0.00762	-0.00604	-0.0026	-0.00282	-0.00755	-0.00897	-0.00261	-0.00159	-0.01068	-0.01538	-0.01077	-0.00304	0.0046	0.00797	0.00612	0.00339	-0.000669088	-0.00516	-0.00637	-0.00743	-0.00902	-0.00856	-0.00949	-0.01364	-0.01062
0.01552	0.02232	0.03911	0.02441	-0.00188	-0.00869	0.00341	0.00877	-0.01168	-0.03766	-0.0415	-0.02538	-0.00803	0.000944755	0.00482	0.00337	0.00155	0.01056	0.01592	0.00438	-0.01054	-0.02072	-0.02805	-0.02372	-0.01181	-0.00723	-0.00566	-0.00215	-0.00232	-0.00726	-0.00892	-0.00255	-0.00155	-0.0109	-0.01585	-0.01113	-0.00312	0.00473	0.00827	0.00649	0.00368	-0.000549173	-0.00522	-0.00658	-0.00768	-0.00917	-0.00859	-0.00958	-0.01392	-0.01108
0.0157	0.02236	0.03922	0.02454	-0.00186	-0.00886	0.00314	0.00851	-0.01199	-0.03795	-0.04157	-0.02522	-0.00764	0.00159	0.00551	0.00371	0.00154	0.01047	0.01575	0.00413	-0.0108	-0.02092	-0.02812	-0.02361	-0.0115	-0.00684	-0.00529	-0.0017	-0.00183	-0.00697	-0.00886	-0.00249	-0.00151	-0.01112	-0.01631	-0.01149	-0.00321	0.00485	0.00856	0.00685	0.00397	-0.00043031	-0.00529	-0.00678	-0.00794	-0.00934	-0.00864	-0.00967	-0.0142	-0.01154
0.01588	0.0224	0.03932	0.02467	-0.00182	-0.00901	0.00288	0.00824	-0.01229	-0.03823	-0.04163	-0.02505	-0.00726	0.00225	0.0062	0.00404	0.00152	0.01037	0.01558	0.00389	-0.01105	-0.02112	-0.0282	-0.0235	-0.0112	-0.00646	-0.00492	-0.00126	-0.00134	-0.00669	-0.00881	-0.00244	-0.00147	-0.01133	-0.01676	-0.01184	-0.00329	0.00498	0.00886	0.0072	0.00425	-0.000312704	-0.00535	-0.00699	-0.0082	-0.00951	-0.00869	-0.00976	-0.01447	-0.01199
0.01607	0.02244	0.03943	0.0248	-0.00178	-0.00916	0.00262	0.00798	-0.01259	-0.0385	-0.04169	-0.02487	-0.00686	0.0029	0.0069	0.00438	0.00151	0.01027	0.01541	0.00364	-0.01131	-0.02133	-0.02828	-0.02339	-0.01089	-0.00608	-0.00456	-0.000811722	-0.000855915	-0.00641	-0.00875	-0.00238	-0.00142	-0.01152	-0.0172	-0.01219	-0.00337	0.0051	0.00914	0.00756	0.00452	-0.000196561	-0.00541	-0.00719	-0.00846	-0.0097	-0.00876	-0.00987	-0.01475	-0.01242
0.01625	0.02248	0.03952	0.02493	-0.00174	-0.0093	0.00236	0.00773	-0.01288	-0.03877	-0.04173	-0.02469	-0.00646	0.00356	0.0076	0.00471	0.00149	0.01017	0.01523	0.00338	-0.01156	-0.02154	-0.02837	-0.02328	-0.01059	-0.00571	-0.00421	-0.000370684	-0.000374766	-0.00614	-0.0087	-0.00232	-0.00136	-0.01171	-0.01762	-0.01252	-0.00344	0.00523	0.00943	0.0079	0.0048	-8.20844e-05	-0.00547	-0.00739	-0.00873	-0.00989	-0.00884	-0.00997	-0.01502	-0.01285
0.01644	0.02251	0.03962	0.02506	-0.00168	-0.00943	0.00211	0.00747	-0.01317	-0.03903	-0.04177	-0.02449	-0.00605	0.00423	0.00829	0.00504	0.00147	0.01006	0.01504	0.00313	-0.01182	-0.02175	-0.02847	-0.02317	-0.01028	-0.00535	-0.00385	6.70163e-05	0.000102183	-0.00587	-0.00865	-0.00227	-0.0013	-0.01189	-0.01804	-0.01284	-0.00351	0.00535	0.00971	0.00825	0.00507	3.05191e-05	-0.00552	-0.00759	-0.009	-0.0101	-0.00893	-0.01008	-0.01529	-0.01328
0.01662	0.02254	0.03971	0.0252	-0.00163	-0.00955	0.00187	0.00722	-0.01345	-0.03928	-0.04179	-0.02429	-0.00564	0.00489	0.00899	0.00537	0.00146	0.00995	0.01486	0.00287	-0.01208	-0.02196	-0.02857	-0.02306	-0.00998	-0.00499	-0.00351	0.00050102	0.000574691	-0.0056	-0.0086	-0.00221	-0.00124	-0.01205	-0.01844	-0.01316	-0.00358	0.00546	0.00998	0.00858	0.00533	0.000141051	-0.00558	-0.00779	-0.00927	-0.01032	-0.00903	-0.0102	-0.01556	-0.01369
0.01681	0.02257	0.0398	0.02533	-0.00156	-0.00966	0.00163	0.00698	-0.01373	-0.03952	-0.04181	-0.02408	-0.00522	0.00556	0.00969	0.0057	0.00143	0.00984	0.01466	0.00262	-0.01233	-0.02218	-0.02867	-0.02295	-0.00968	-0.00464	-0.00317	0.00093099	0.00104	-0.00533	-0.00855	-0.00215	-0.00117	-0.01221	-0.01882	-0.01346	-0.00365	0.00558	0.01025	0.00891	0.00559	0.00024934	-0.00563	-0.00798	-0.00955	-0.01054	-0.00914	-0.01032	-0.01583	-0.0141
0.01699	0.0226	0.03988	0.02546	-0.00149	-0.00977	0.0014	0.00673	-0.014	-0.03975	-0.04182	-0.02386	-0.0048	0.00623	0.01038	0.00604	0.00141	0.00973	0.01447	0.00236	-0.01259	-0.0224	-0.02878	-0.02284	-0.00938	-0.0043	-0.00284	0.00136	0.00151	-0.00507	-0.00851	-0.0021	-0.0011	-0.01235	-0.0192	-0.01376	-0.00371	0.0057	0.01052	0.00924	0.00585	0.000355218	-0.00569	-0.00818	-0.00983	-0.01078	-0.00927	-0.01044	-0.01609	-0.01449
0.01718	0.02263	0.03996	0.02559	-0.00142	-0.00986	0.00117	0.0065	-0.01426	-0.03997	-0.04181	-0.02363	-0.00437	0.0069	0.01108	0.00637	0.00139	0.00961	0.01427	0.0021	-0.01285	-0.02263	-0.02889	-0.02273	-0.00908	-0.00396	-0.00251	0.00178	0.00196	-0.00481	-0.00846	-0.00204	-0.00103	-0.01249	-0.01956	-0.01404	-0.00377	0.00581	0.01078	0.00955	0.0061	0.000458521	-0.00574	-0.00837	-0.01011	-0.01102	-0.0094	-0.01057	-0.01635	-0.01488
0.01736	0.02265	0.04004	0.02572	-0.00134	-0.00995	0.000953747	0.00626	-0.01452	-0.04018	-0.0418	-0.0234	-0.00393	0.00757	0.01178	0.0067	0.00137	0.00949	0.01407	0.00184	-0.01311	-0.02285	-0.029	-0.02263	-0.00878	-0.00363	-0.00219	0.00219	0.00242	-0.00455	-0.00841	-0.00199	-0.000944971	-0.01261	-0.01991	-0.01432	-0.00382	0.00592	0.01103	0.00987	0.00634	0.000559081	-0.00579	-0.00856	-0.0104	-0.01128	-0.00954	-0.0107	-0.01661	-0.01526
0.01755	0.02267	0.04011	0.02584	-0.00125	-0.01003	0.000740717	0.00603	-0.01476	-0.04038	-0.04178	-0.02316	-0.0035	0.00825	0.01248	0.00704	0.00135	0.00936	0.01386	0.00157	-0.01336	-0.02308	-0.02912	-0.02252	-0.00848	-0.0033	-0.00187	0.0026	0.00286	-0.00429	-0.00837	-0.00193	-0.000860166	-0.01273	-0.02024	-0.01458	-0.00388	0.00603	0.01128	0.01017	0.00658	0.000656732	-0.00585	-0.00875	-0.01069	-0.01154	-0.00968	-0.01084	-0.01686	-0.01563
0.01773	0.02269	0.04018	0.02597	-0.00116	-0.0101	0.000534242	0.00581	-0.015	-0.04057	-0.04174	-0.02291	-0.00305	0.00892	0.01318	0.00737	0.00133	0.00924	0.01365	0.00131	-0.01362	-0.0233	-0.02924	-0.02241	-0.00818	-0.00298	-0.00156	0.00301	0.0033	-0.00404	-0.00832	-0.00187	-0.000771213	-0.01283	-0.02056	-0.01484	-0.00392	0.00614	0.01153	0.01047	0.00681	0.000751309	-0.0059	-0.00894	-0.01098	-0.01181	-0.00984	-0.01098	-0.01711	-0.016
0.01792	0.0227	0.04024	0.0261	-0.00107	-0.01017	0.000334468	0.00559	-0.01523	-0.04074	-0.0417	-0.02265	-0.00261	0.0096	0.01388	0.00771	0.00131	0.00911	0.01343	0.00104	-0.01387	-0.02353	-0.02936	-0.02229	-0.00788	-0.00267	-0.00126	0.00341	0.00374	-0.00379	-0.00828	-0.00181	-0.000678161	-0.01292	-0.02087	-0.01508	-0.00397	0.00625	0.01177	0.01076	0.00704	0.000842645	-0.00595	-0.00913	-0.01127	-0.01209	-0.01	-0.01112	-0.01736	-0.01635
0.0181	0.02272	0.0403	0.02622	-0.000967022	-0.01022	0.000141534	0.00538	-0.01545	-0.04091	-0.04165	-0.02239	-0.00216	0.01028	0.01458	0.00805	0.00129	0.00898	0.01322	0.000779543	-0.01412	-0.02376	-0.02948	-0.02218	-0.00758	-0.00236	-0.000966357	0.0038	0.00417	-0.00355	-0.00824	-0.00176	-0.000581063	-0.01301	-0.02116	-0.01531	-0.00401	0.00635	0.012	0.01104	0.00726	0.000930573	-0.00601	-0.00931	-0.01156	-0.01237	-0.01018	-0.01126	-0.0176	-0.0167
0.01829	0.02273	0.04036	0.02634	-0.000862628	-0.01027	-4.44148e-05	0.00517	-0.01566	-0.04106	-0.04158	-0.02212	-0.00171	0.01096	0.01528	0.00839	0.00128	0.00885	0.013	0.000514234	-0.01437	-0.02398	-0.0296	-0.02207	-0.00729	-0.00206	-0.000678882	0.00419	0.00459	-0.00331	-0.00819	-0.0017	-0.000479969	-0.01308	-0.02144	-0.01554	-0.00404	0.00646	0.01223	0.01132	0.00748	0.00101	-0.00606	-0.0095	-0.01186	-0.01266	-0.01035	-0.01141	-0.01785	-0.01704
0.01847	0.02274	0.04041	0.02646	-0.000753901	-0.01031	-0.000223237	0.00497	-0.01587	-0.0412	-0.04151	-0.02184	-0.00125	0.01164	0.01598	0.00873	0.00126	0.00871	0.01277	0.000248692	-0.01462	-0.02421	-0.02972	-0.02195	-0.00699	-0.00176	-0.000398728	0.00456	0.005	-0.00307	-0.00815	-0.00164	-0.000374931	-0.01314	-0.0217	-0.01575	-0.00407	0.00656	0.01245	0.01159	0.00768	0.0011	-0.00611	-0.00968	-0.01216	-0.01296	-0.01054	-0.01156	-0.01808	-0.01737
0.01866	0.02274	0.04046	0.02658	-0.000641013	-0.01034	-0.000394809	0.00478	-0.01606	-0.04133	-0.04142	-0.02156	-0.000796352	0.01232	0.01668	0.00907	0.00125	0.00858	0.01255	-1.69153e-05	-0.01486	-0.02444	-0.02985	-0.02183	-0.00669	-0.00147	-0.000126059	0.00494	0.00541	-0.00283	-0.0081	-0.00158	-0.000266	-0.0132	-0.02196	-0.01594	-0.0041	0.00666	0.01267	0.01185	0.00788	0.00117	-0.00617	-0.00987	-0.01246	-0.01326	-0.01073	-0.01171	-0.01832	-0.01769
0.01884	0.02275	0.0405	0.0267	-0.000524156	-0.01036	-0.000559073	0.00459	-0.01624	-0.04144	-0.04132	-0.02127	-0.000337769	0.01299	0.01738	0.00942	0.00124	0.00844	0.01232	-0.000282389	-0.0151	-0.02466	-0.02997	-0.02171	-0.0064	-0.00119	0.000139016	0.0053	0.00581	-0.0026	-0.00806	-0.00152	-0.000153225	-0.01324	-0.02219	-0.01613	-0.00412	0.00677	0.01288	0.0121	0.00807	0.00124	-0.00622	-0.01005	-0.01276	-0.01356	-0.01093	-0.01187	-0.01855	-0.01801
0.01902	0.02275	0.04054	0.02682	-0.00040353	-0.01038	-0.000715994	0.00441	-0.01641	-0.04154	-0.04122	-0.02098	0.000122168	0.01367	0.01808	0.00976	0.00123	0.00831	0.01208	-0.000547521	-0.01534	-0.02488	-0.0301	-0.02159	-0.0061	-0.000910616	0.0003964	0.00566	0.00621	-0.00237	-0.00802	-0.00146	-3.66539e-05	-0.01327	-0.02242	-0.01631	-0.00414	0.00686	0.01309	0.01234	0.00826	0.00131	-0.00628	-0.01023	-0.01306	-0.01388	-0.01113	-0.01203	-0.01878	-0.01832
0.01921	0.02275	0.04058	0.02693	-0.000279335	-0.01038	-0.000865532	0.00424	-0.01657	-0.04163	-0.0411	-0.02068	0.000582991	0.01434	0.01877	0.01011	0.00122	0.00817	0.01185	-0.000812107	-0.01557	-0.0251	-0.03022	-0.02147	-0.0058	-0.000638825	0.000645995	0.006	0.00659	-0.00215	-0.00797	-0.0014	8.36632e-05	-0.01329	-0.02262	-0.01647	-0.00415	0.00696	0.01329	0.01258	0.00844	0.00138	-0.00633	-0.01041	-0.01337	-0.01419	-0.01134	-0.01219	-0.019	-0.01861
0.01939	0.02275	0.04061	0.02704	-0.000151772	-0.01038	-0.00101	0.00407	-0.01672	-0.0417	-0.04097	-0.02038	0.00104	0.01502	0.01947	0.01047	0.00122	0.00803	0.01161	-0.00108	-0.0158	-0.02532	-0.03034	-0.02135	-0.00551	-0.000372957	0.000887705	0.00634	0.00697	-0.00193	-0.00793	-0.00134	0.000207678	-0.0133	-0.02282	-0.01663	-0.00416	0.00706	0.01348	0.0128	0.00861	0.00144	-0.00639	-0.01058	-0.01367	-0.01451	-0.01156	-0.01235	-0.01922	-0.0189
0.01958	0.02274	0.04064	0.02716	-2.10385e-05	-0.01038	-0.00114	0.00391	-0.01685	-0.04175	-0.04082	-0.02007	0.00151	0.01569	0.02016	0.01082	0.00123	0.00789	0.01137	-0.00134	-0.01603	-0.02553	-0.03047	-0.02122	-0.00521	-0.000112991	0.00112	0.00667	0.00734	-0.00171	-0.00788	-0.00127	0.000335341	-0.01331	-0.023	-0.01677	-0.00416	0.00716	0.01367	0.01302	0.00877	0.00149	-0.00645	-0.01076	-0.01397	-0.01484	-0.01178	-0.01251	-0.01944	-0.01919
0.01976	0.02274	0.04066	0.02726	0.000112664	-0.01036	-0.00127	0.00376	-0.01698	-0.04179	-0.04067	-0.01975	0.00197	0.01635	0.02085	0.01117	0.00123	0.00775	0.01113	-0.0016	-0.01625	-0.02575	-0.03059	-0.02109	-0.00491	0.000141094	0.00135	0.007	0.00771	-0.00149	-0.00783	-0.00121	0.000466605	-0.0133	-0.02316	-0.0169	-0.00416	0.00725	0.01385	0.01322	0.00892	0.00154	-0.00651	-0.01094	-0.01428	-0.01516	-0.012	-0.01267	-0.01965	-0.01946
0.01995	0.02273	0.04069	0.02737	0.000249136	-0.01034	-0.00139	0.00362	-0.01709	-0.04182	-0.04051	-0.01944	0.00243	0.01702	0.02154	0.01153	0.00124	0.00762	0.01088	-0.00186	-0.01647	-0.02595	-0.03071	-0.02096	-0.00462	0.000389318	0.00156	0.00731	0.00806	-0.00128	-0.00779	-0.00114	0.00060142	-0.01328	-0.02331	-0.01701	-0.00415	0.00734	0.01402	0.01342	0.00907	0.00159	-0.00656	-0.01111	-0.01458	-0.01549	-0.01222	-0.01284	-0.01986	-0.01973
0.02013	0.02272	0.0407	0.02747	0.000388177	-0.01031	-0.0015	0.00348	-0.01719	-0.04183	-0.04033	-0.01911	0.00288	0.01768	0.02223	0.01189	0.00125	0.00748	0.01064	-0.00212	-0.01668	-0.02616	-0.03083	-0.02083	-0.00433	0.000631704	0.00177	0.00761	0.00841	-0.00107	-0.00774	-0.00108	0.000739737	-0.01325	-0.02345	-0.01712	-0.00414	0.00744	0.01419	0.01361	0.0092	0.00163	-0.00662	-0.01129	-0.01489	-0.01583	-0.01245	-0.013	-0.02007	-0.01999
0.02032	0.02271	0.04072	0.02758	0.000529588	-0.01028	-0.00161	0.00336	-0.01727	-0.04182	-0.04015	-0.01879	0.00334	0.01833	0.02291	0.01225	0.00127	0.00734	0.01039	-0.00238	-0.01688	-0.02636	-0.03095	-0.0207	-0.00403	0.00086827	0.00197	0.00791	0.00874	-0.000869298	-0.00769	-0.00101	0.000881507	-0.01322	-0.02357	-0.01721	-0.00412	0.00753	0.01435	0.01379	0.00933	0.00167	-0.00669	-0.01146	-0.01519	-0.01616	-0.01269	-0.01317	-0.02027	-0.02024
0.0205	0.02269	0.04073	0.02768	0.000673169	-0.01024	-0.0017	0.00324	-0.01735	-0.0418	-0.03995	-0.01846	0.00379	0.01898	0.02359	0.01262	0.0013	0.0072	0.01014	-0.00263	-0.01709	-0.02656	-0.03106	-0.02056	-0.00374	0.0011	0.00217	0.00819	0.00907	-0.000669075	-0.00765	-0.00094549	0.00103	-0.01317	-0.02368	-0.01729	-0.0041	0.00762	0.0145	0.01395	0.00945	0.0017	-0.00675	-0.01163	-0.01549	-0.0165	-0.01292	-0.01334	-0.02047	-0.02049
0.02069	0.02268	0.04073	0.02777	0.000818727	-0.01019	-0.00179	0.00313	-0.01741	-0.04176	-0.03974	-0.01813	0.00425	0.01962	0.02427	0.01298	0.00132	0.00707	0.00989	-0.00288	-0.01728	-0.02675	-0.03118	-0.02043	-0.00344	0.00132	0.00235	0.00847	0.00939	-0.000472677	-0.0076	-0.000877233	0.00118	-0.01311	-0.02377	-0.01736	-0.00408	0.00771	0.01465	0.01411	0.00956	0.00173	-0.00681	-0.0118	-0.01579	-0.01683	-0.01316	-0.01351	-0.02066	-0.02073
0.02087	0.02266	0.04074	0.02787	0.000966103	-0.01014	-0.00187	0.00303	-0.01745	-0.04171	-0.03952	-0.01779	0.00469	0.02026	0.02494	0.01335	0.00136	0.00694	0.00964	-0.00313	-0.01747	-0.02694	-0.03129	-0.02029	-0.00315	0.00154	0.00253	0.00873	0.0097	-0.000280191	-0.00755	-0.000808018	0.00133	-0.01304	-0.02385	-0.01742	-0.00404	0.00779	0.01479	0.01426	0.00966	0.00175	-0.00688	-0.01197	-0.0161	-0.01717	-0.0134	-0.01367	-0.02085	-0.02096
0.02106	0.02264	0.04074	0.02796	0.00112	-0.01008	-0.00195	0.00294	-0.01748	-0.04164	-0.03928	-0.01745	0.00514	0.0209	0.02561	0.01372	0.00139	0.0068	0.00938	-0.00338	-0.01765	-0.02712	-0.0314	-0.02015	-0.00286	0.00176	0.00269	0.00899	0.01	-9.17071e-05	-0.0075	-0.000737858	0.00148	-0.01297	-0.02391	-0.01746	-0.00401	0.00788	0.01493	0.0144	0.00975	0.00177	-0.00694	-0.01214	-0.01639	-0.01751	-0.01364	-0.01384	-0.02104	-0.02118
0.02124	0.02262	0.04073	0.02805	0.00127	-0.01001	-0.00201	0.00285	-0.0175	-0.04155	-0.03904	-0.01711	0.00558	0.02152	0.02627	0.01409	0.00144	0.00667	0.00913	-0.00363	-0.01783	-0.0273	-0.0315	-0.02	-0.00257	0.00196	0.00285	0.00923	0.01029	9.26815e-05	-0.00745	-0.000666771	0.00164	-0.01288	-0.02396	-0.0175	-0.00396	0.00797	0.01506	0.01452	0.00983	0.00178	-0.00701	-0.0123	-0.01669	-0.01785	-0.01389	-0.01401	-0.02122	-0.0214
0.02143	0.0226	0.04073	0.02814	0.00142	-0.00994	-0.00207	0.00278	-0.0175	-0.04144	-0.03878	-0.01677	0.00601	0.02214	0.02693	0.01447	0.00149	0.00654	0.00888	-0.00387	-0.018	-0.02748	-0.03161	-0.01986	-0.00228	0.00217	0.003	0.00946	0.01057	0.000272884	-0.0074	-0.00059477	0.0018	-0.01278	-0.024	-0.01752	-0.00392	0.00805	0.01518	0.01464	0.00991	0.00178	-0.00708	-0.01247	-0.01699	-0.01819	-0.01413	-0.01418	-0.0214	-0.0216
0.02161	0.02257	0.04072	0.02823	0.00157	-0.00986	-0.00212	0.00272	-0.01749	-0.04132	-0.03852	-0.01643	0.00644	0.02275	0.02758	0.01484	0.00154	0.00642	0.00862	-0.00411	-0.01817	-0.02765	-0.03171	-0.01972	-0.00199	0.00236	0.00314	0.00969	0.01084	0.000448808	-0.00734	-0.000521871	0.00197	-0.01268	-0.02402	-0.01753	-0.00387	0.00813	0.01529	0.01474	0.00997	0.00179	-0.00715	-0.01263	-0.01728	-0.01852	-0.01438	-0.01435	-0.02157	-0.02181
0.0218	0.02255	0.04071	0.02831	0.00172	-0.00978	-0.00217	0.00266	-0.01746	-0.04117	-0.03824	-0.01608	0.00686	0.02335	0.02823	0.01522	0.00161	0.00629	0.00837	-0.00434	-0.01832	-0.02781	-0.03181	-0.01957	-0.00171	0.00255	0.00327	0.0099	0.0111	0.000620363	-0.00729	-0.000448088	0.00213	-0.01256	-0.02402	-0.01752	-0.00381	0.00821	0.0154	0.01483	0.01002	0.00178	-0.00722	-0.01279	-0.01757	-0.01886	-0.01462	-0.01452	-0.02175	-0.022
0.02198	0.02252	0.04069	0.02839	0.00188	-0.00969	-0.0022	0.00262	-0.01741	-0.04101	-0.03795	-0.01573	0.00728	0.02394	0.02886	0.0156	0.00167	0.00617	0.00811	-0.00458	-0.01847	-0.02797	-0.03191	-0.01942	-0.00142	0.00274	0.0034	0.0101	0.01135	0.000787456	-0.00724	-0.000373438	0.0023	-0.01244	-0.02401	-0.01751	-0.00375	0.00829	0.0155	0.01492	0.01006	0.00177	-0.00729	-0.01295	-0.01786	-0.01919	-0.01487	-0.01468	-0.02191	-0.02219
0.02216	0.02249	0.04067	0.02847	0.00204	-0.0096	-0.00223	0.00258	-0.01735	-0.04084	-0.03765	-0.01539	0.00769	0.02452	0.0295	0.01598	0.00175	0.00606	0.00786	-0.0048	-0.01862	-0.02812	-0.03201	-0.01928	-0.00114	0.00292	0.00351	0.01029	0.0116	0.000949996	-0.00719	-0.000297934	0.00248	-0.01231	-0.02399	-0.01748	-0.00368	0.00837	0.0156	0.01499	0.0101	0.00176	-0.00736	-0.01311	-0.01815	-0.01953	-0.01511	-0.01485	-0.02208	-0.02238
0.02235	0.02247	0.04066	0.02855	0.00219	-0.0095	-0.00226	0.00256	-0.01728	-0.04064	-0.03733	-0.01504	0.00809	0.02509	0.03012	0.01636	0.00183	0.00594	0.00761	-0.00503	-0.01875	-0.02826	-0.0321	-0.01913	-0.000854333	0.00309	0.00362	0.01047	0.01183	0.00111	-0.00713	-0.000221593	0.00265	-0.01216	-0.02396	-0.01745	-0.00361	0.00845	0.01568	0.01505	0.01012	0.00174	-0.00743	-0.01326	-0.01843	-0.01986	-0.01536	-0.01502	-0.02224	-0.02256
0.02253	0.02244	0.04063	0.02862	0.00235	-0.0094	-0.00227	0.00254	-0.01719	-0.04042	-0.03701	-0.01469	0.00849	0.02565	0.03074	0.01674	0.00191	0.00583	0.00735	-0.00525	-0.01888	-0.0284	-0.03219	-0.01898	-0.000574481	0.00326	0.00372	0.01064	0.01205	0.00126	-0.00708	-0.000144429	0.00283	-0.01201	-0.0239	-0.0174	-0.00354	0.00853	0.01576	0.0151	0.01013	0.00171	-0.00751	-0.01342	-0.01871	-0.02018	-0.0156	-0.01518	-0.0224	-0.02273
0.02272	0.02241	0.04061	0.0287	0.00251	-0.0093	-0.00228	0.00254	-0.01708	-0.04019	-0.03668	-0.01434	0.00888	0.0262	0.03135	0.01712	0.00201	0.00572	0.0071	-0.00546	-0.019	-0.02854	-0.03228	-0.01883	-0.000296764	0.00342	0.00381	0.0108	0.01226	0.00141	-0.00702	-6.64654e-05	0.00301	-0.01185	-0.02384	-0.01734	-0.00346	0.0086	0.01583	0.01513	0.01013	0.00168	-0.00758	-0.01357	-0.01899	-0.02051	-0.01584	-0.01535	-0.02255	-0.02289
0.0229	0.02237	0.04059	0.02877	0.00266	-0.00919	-0.00228	0.00255	-0.01696	-0.03994	-0.03633	-0.01399	0.00926	0.02673	0.03194	0.0175	0.00211	0.00561	0.00685	-0.00567	-0.01911	-0.02867	-0.03236	-0.01868	-2.14098e-05	0.00358	0.00389	0.01095	0.01246	0.00155	-0.00697	1.22401e-05	0.0032	-0.01168	-0.02376	-0.01726	-0.00337	0.00867	0.0159	0.01516	0.01012	0.00164	-0.00766	-0.01372	-0.01926	-0.02083	-0.01608	-0.01551	-0.0227	-0.02305
0.02309	0.02234	0.04056	0.02884	0.00282	-0.00907	-0.00227	0.00256	-0.01682	-0.03967	-0.03597	-0.01364	0.00963	0.02726	0.03253	0.01789	0.00221	0.00551	0.0066	-0.00588	-0.01922	-0.02879	-0.03244	-0.01853	0.000251343	0.00373	0.00397	0.01109	0.01265	0.00169	-0.00692	9.16219e-05	0.00338	-0.0115	-0.02367	-0.01718	-0.00328	0.00875	0.01596	0.01517	0.01011	0.0016	-0.00774	-0.01386	-0.01953	-0.02115	-0.01632	-0.01568	-0.02285	-0.02321
0.02327	0.02231	0.04053	0.02891	0.00298	-0.00896	-0.00226	0.00259	-0.01666	-0.03938	-0.03561	-0.01329	0.00999	0.02777	0.03311	0.01827	0.00233	0.00542	0.00636	-0.00608	-0.01932	-0.0289	-0.03252	-0.01838	0.000521253	0.00388	0.00404	0.01121	0.01282	0.00182	-0.00686	0.000171614	0.00357	-0.01132	-0.02356	-0.01708	-0.00319	0.00882	0.01601	0.01518	0.01008	0.00155	-0.00782	-0.01401	-0.01979	-0.02146	-0.01656	-0.01584	-0.023	-0.02336
0.02346	0.02228	0.0405	0.02897	0.00314	-0.00884	-0.00224	0.00262	-0.01649	-0.03907	-0.03523	-0.01295	0.01034	0.02827	0.03368	0.01865	0.00245	0.00532	0.00611	-0.00628	-0.01941	-0.02901	-0.0326	-0.01823	0.000788081	0.00402	0.00409	0.01133	0.01299	0.00195	-0.00681	0.000252151	0.00376	-0.01112	-0.02344	-0.01698	-0.00309	0.00888	0.01605	0.01517	0.01004	0.0015	-0.00789	-0.01415	-0.02005	-0.02177	-0.0168	-0.016	-0.02314	-0.0235
0.02364	0.02224	0.04047	0.02904	0.00329	-0.00871	-0.00221	0.00267	-0.0163	-0.03875	-0.03484	-0.0126	0.01068	0.02875	0.03424	0.01903	0.00257	0.00523	0.00587	-0.00647	-0.01949	-0.02911	-0.03268	-0.01808	0.00105	0.00416	0.00414	0.01143	0.01315	0.00207	-0.00675	0.000333168	0.00396	-0.01092	-0.02331	-0.01686	-0.00299	0.00895	0.01608	0.01515	0.00999	0.00144	-0.00797	-0.01429	-0.02031	-0.02208	-0.01703	-0.01616	-0.02328	-0.02364
0.02383	0.02221	0.04044	0.0291	0.00345	-0.00858	-0.00218	0.00273	-0.01609	-0.03841	-0.03444	-0.01226	0.01101	0.02922	0.03479	0.01942	0.00271	0.00515	0.00563	-0.00665	-0.01956	-0.02921	-0.03275	-0.01794	0.00131	0.00429	0.00419	0.01152	0.0133	0.00219	-0.0067	0.000414597	0.00415	-0.01071	-0.02317	-0.01674	-0.00289	0.00901	0.01611	0.01512	0.00992	0.00137	-0.00805	-0.01443	-0.02056	-0.02237	-0.01726	-0.01632	-0.02342	-0.02378
0.02401	0.02218	0.04041	0.02917	0.00361	-0.00845	-0.00214	0.0028	-0.01587	-0.03804	-0.03403	-0.01192	0.01133	0.02967	0.03533	0.0198	0.00285	0.00507	0.00539	-0.00683	-0.01963	-0.0293	-0.03282	-0.01779	0.00157	0.00441	0.00422	0.01161	0.01343	0.0023	-0.00664	0.000496375	0.00435	-0.01049	-0.02301	-0.0166	-0.00278	0.00907	0.01613	0.01507	0.00985	0.0013	-0.00813	-0.01456	-0.0208	-0.02267	-0.01749	-0.01648	-0.02355	-0.02391
0.0242	0.02214	0.04038	0.02923	0.00377	-0.00832	-0.00209	0.00287	-0.01563	-0.03766	-0.03361	-0.01157	0.01163	0.03011	0.03585	0.02018	0.00299	0.00499	0.00516	-0.00701	-0.01968	-0.02938	-0.03288	-0.01765	0.00182	0.00453	0.00425	0.01168	0.01356	0.00241	-0.00659	0.000578434	0.00455	-0.01026	-0.02284	-0.01645	-0.00267	0.00913	0.01615	0.01502	0.00977	0.00123	-0.00821	-0.0147	-0.02104	-0.02296	-0.01771	-0.01664	-0.02368	-0.02404
0.02438	0.02211	0.04035	0.02929	0.00392	-0.00818	-0.00204	0.00296	-0.01538	-0.03726	-0.03318	-0.01124	0.01193	0.03053	0.03636	0.02055	0.00315	0.00492	0.00492	-0.00717	-0.01973	-0.02946	-0.03295	-0.0175	0.00207	0.00464	0.00427	0.01174	0.01367	0.00251	-0.00654	0.00066071	0.00475	-0.01002	-0.02266	-0.0163	-0.00256	0.00919	0.01615	0.01495	0.00968	0.00115	-0.0083	-0.01482	-0.02128	-0.02324	-0.01794	-0.01679	-0.02381	-0.02416
0.02457	0.02208	0.04032	0.02935	0.00408	-0.00804	-0.00198	0.00306	-0.01511	-0.03685	-0.03274	-0.0109	0.01221	0.03094	0.03686	0.02093	0.00331	0.00486	0.00469	-0.00734	-0.01977	-0.02953	-0.03301	-0.01736	0.00231	0.00475	0.00429	0.01179	0.01377	0.0026	-0.00649	0.000743136	0.00496	-0.00978	-0.02246	-0.01613	-0.00244	0.00924	0.01615	0.01487	0.00958	0.00106	-0.00838	-0.01495	-0.02151	-0.02352	-0.01815	-0.01695	-0.02394	-0.02428
0.02475	0.02204	0.04029	0.02941	0.00423	-0.0079	-0.00191	0.00317	-0.01482	-0.03641	-0.03229	-0.01057	0.01248	0.03133	0.03735	0.0213	0.00347	0.0048	0.00447	-0.00749	-0.0198	-0.02959	-0.03307	-0.01723	0.00255	0.00485	0.00429	0.01183	0.01386	0.00269	-0.00644	0.000825639	0.00516	-0.00953	-0.02225	-0.01595	-0.00232	0.00929	0.01614	0.01478	0.00947	0.000974843	-0.00846	-0.01507	-0.02173	-0.02379	-0.01837	-0.0171	-0.02407	-0.02439
0.02494	0.02201	0.04026	0.02947	0.00439	-0.00776	-0.00184	0.00329	-0.01451	-0.03596	-0.03183	-0.01024	0.01274	0.0317	0.03782	0.02168	0.00365	0.00474	0.00425	-0.00764	-0.01983	-0.02965	-0.03313	-0.01709	0.00278	0.00495	0.00429	0.01186	0.01394	0.00278	-0.00639	0.000908112	0.00537	-0.00927	-0.02203	-0.01577	-0.0022	0.00934	0.01612	0.01468	0.00934	0.000879775	-0.00854	-0.01519	-0.02194	-0.02405	-0.01858	-0.01725	-0.02419	-0.02451
0.02512	0.02198	0.04023	0.02953	0.00455	-0.00761	-0.00177	0.00342	-0.01419	-0.03549	-0.03136	-0.00991	0.01299	0.03205	0.03827	0.02204	0.00383	0.00469	0.00403	-0.00779	-0.01984	-0.0297	-0.03319	-0.01696	0.00301	0.00504	0.00429	0.01188	0.01401	0.00285	-0.00634	0.000990441	0.00558	-0.00901	-0.0218	-0.01558	-0.00207	0.00939	0.0161	0.01457	0.00921	0.000779848	-0.00862	-0.0153	-0.02215	-0.02431	-0.01879	-0.0174	-0.02431	-0.02462
0.0253	0.02195	0.0402	0.0296	0.0047	-0.00746	-0.00169	0.00356	-0.01386	-0.035	-0.03088	-0.00958	0.01322	0.03238	0.03871	0.02241	0.00401	0.00465	0.00382	-0.00792	-0.01985	-0.02974	-0.03324	-0.01683	0.00323	0.00513	0.00427	0.01189	0.01407	0.00292	-0.00629	0.00107	0.00579	-0.00874	-0.02156	-0.01537	-0.00195	0.00943	0.01606	0.01444	0.00907	0.000675203	-0.0087	-0.01541	-0.02236	-0.02456	-0.01899	-0.01755	-0.02443	-0.02472
0.02549	0.02192	0.04018	0.02966	0.00486	-0.00731	-0.0016	0.00371	-0.0135	-0.03449	-0.03039	-0.00926	0.01344	0.0327	0.03914	0.02277	0.00421	0.00461	0.00361	-0.00805	-0.01985	-0.02978	-0.03329	-0.0167	0.00345	0.00521	0.00426	0.01189	0.01412	0.00299	-0.00624	0.00115	0.006	-0.00846	-0.02131	-0.01516	-0.00182	0.00947	0.01602	0.01431	0.00891	0.000565979	-0.00878	-0.01552	-0.02255	-0.0248	-0.01919	-0.0177	-0.02455	-0.02483
0.02567	0.02189	0.04015	0.02972	0.00501	-0.00716	-0.00151	0.00386	-0.01313	-0.03397	-0.02989	-0.00894	0.01364	0.033	0.03955	0.02313	0.00441	0.00458	0.00341	-0.00817	-0.01984	-0.02981	-0.03334	-0.01658	0.00366	0.00529	0.00423	0.01188	0.01416	0.00304	-0.0062	0.00124	0.00621	-0.00818	-0.02105	-0.01495	-0.00169	0.0095	0.01597	0.01416	0.00875	0.000452317	-0.00886	-0.01562	-0.02274	-0.02504	-0.01938	-0.01785	-0.02467	-0.02493
0.02586	0.02186	0.04013	0.02978	0.00516	-0.00701	-0.00141	0.00403	-0.01275	-0.03343	-0.02939	-0.00863	0.01383	0.03328	0.03994	0.02349	0.00461	0.00455	0.00321	-0.00829	-0.01983	-0.02983	-0.03339	-0.01646	0.00387	0.00536	0.0042	0.01186	0.01419	0.00309	-0.00616	0.00132	0.00642	-0.00789	-0.02077	-0.01472	-0.00156	0.00954	0.01591	0.014	0.00858	0.000334357	-0.00894	-0.01572	-0.02292	-0.02526	-0.01957	-0.018	-0.02479	-0.02502
0.02604	0.02184	0.04011	0.02984	0.00532	-0.00685	-0.0013	0.00421	-0.01235	-0.03287	-0.02888	-0.00832	0.01401	0.03354	0.04032	0.02384	0.00482	0.00453	0.00301	-0.0084	-0.0198	-0.02985	-0.03344	-0.01634	0.00406	0.00542	0.00416	0.01183	0.0142	0.00314	-0.00612	0.0014	0.00664	-0.00759	-0.02049	-0.01449	-0.00143	0.00956	0.01585	0.01384	0.0084	0.000212238	-0.00902	-0.01582	-0.0231	-0.02548	-0.01976	-0.01814	-0.02491	-0.02512
0.02623	0.02181	0.04009	0.0299	0.00547	-0.00669	-0.0012	0.0044	-0.01193	-0.0323	-0.02835	-0.00801	0.01417	0.03378	0.04068	0.02419	0.00504	0.00452	0.00282	-0.0085	-0.01977	-0.02986	-0.03348	-0.01623	0.00426	0.00548	0.00412	0.0118	0.01421	0.00318	-0.00608	0.00147	0.00685	-0.00729	-0.0202	-0.01425	-0.0013	0.00959	0.01577	0.01366	0.00821	8.61004e-05	-0.0091	-0.01591	-0.02326	-0.0257	-0.01994	-0.01829	-0.02503	-0.02522
0.02641	0.02179	0.04007	0.02997	0.00563	-0.00653	-0.00108	0.00459	-0.0115	-0.03171	-0.02783	-0.0077	0.01432	0.034	0.04102	0.02453	0.00526	0.00451	0.00264	-0.0086	-0.01973	-0.02987	-0.03353	-0.01613	0.00444	0.00554	0.00407	0.01175	0.01421	0.00321	-0.00604	0.00155	0.00707	-0.00698	-0.0199	-0.01401	-0.00116	0.00961	0.01569	0.01347	0.00801	-4.39152e-05	-0.00918	-0.01599	-0.02342	-0.0259	-0.02012	-0.01843	-0.02514	-0.02531
0.0266	0.02176	0.04006	0.03004	0.00578	-0.00637	-0.000968006	0.0048	-0.01106	-0.03111	-0.02729	-0.00741	0.01445	0.0342	0.04135	0.02487	0.00549	0.00451	0.00246	-0.00868	-0.01968	-0.02987	-0.03357	-0.01602	0.00462	0.00559	0.00402	0.0117	0.01419	0.00323	-0.006	0.00163	0.00728	-0.00667	-0.01959	-0.01375	-0.00103	0.00962	0.0156	0.01326	0.0078	-0.000177669	-0.00925	-0.01607	-0.02358	-0.02609	-0.02029	-0.01857	-0.02526	-0.0254
0.02678	0.02174	0.04005	0.0301	0.00593	-0.00621	-0.000846687	0.00501	-0.0106	-0.03049	-0.02674	-0.00711	0.01457	0.03437	0.04166	0.0252	0.00573	0.00451	0.00229	-0.00876	-0.01963	-0.02987	-0.03361	-0.01593	0.00479	0.00563	0.00396	0.01163	0.01417	0.00325	-0.00597	0.00171	0.0075	-0.00635	-0.01927	-0.0135	-0.000898064	0.00964	0.0155	0.01305	0.00758	-0.000315009	-0.00933	-0.01615	-0.02372	-0.02628	-0.02046	-0.01871	-0.02538	-0.02549
0.02697	0.02172	0.04004	0.03017	0.00609	-0.00605	-0.000721088	0.00524	-0.01013	-0.02985	-0.02619	-0.00682	0.01468	0.03453	0.04194	0.02552	0.00597	0.00452	0.00213	-0.00884	-0.01956	-0.02986	-0.03365	-0.01583	0.00495	0.00567	0.0039	0.01156	0.01413	0.00326	-0.00594	0.00178	0.00771	-0.00603	-0.01894	-0.01323	-0.000765705	0.00964	0.0154	0.01283	0.00736	-0.000455729	-0.0094	-0.01622	-0.02385	-0.02646	-0.02062	-0.01885	-0.02549	-0.02558
0.02715	0.02171	0.04004	0.03025	0.00624	-0.00589	-0.00059135	0.00547	-0.00964	-0.0292	-0.02563	-0.00653	0.01477	0.03467	0.04221	0.02584	0.00621	0.00454	0.00197	-0.0089	-0.01949	-0.02984	-0.03369	-0.01575	0.0051	0.0057	0.00383	0.01148	0.01409	0.00326	-0.00591	0.00185	0.00793	-0.0057	-0.0186	-0.01297	-0.000634076	0.00965	0.01528	0.0126	0.00713	-0.000599614	-0.00947	-0.01629	-0.02398	-0.02663	-0.02078	-0.019	-0.02561	-0.02567
0.02734	0.02169	0.04003	0.03032	0.0064	-0.00572	-0.000457612	0.00571	-0.00914	-0.02854	-0.02507	-0.00625	0.01484	0.03478	0.04247	0.02615	0.00646	0.00456	0.00181	-0.00896	-0.01942	-0.02982	-0.03372	-0.01567	0.00525	0.00573	0.00376	0.01139	0.01403	0.00326	-0.00589	0.00192	0.00815	-0.00537	-0.01826	-0.0127	-0.000503491	0.00964	0.01516	0.01236	0.00688	-0.000746445	-0.00954	-0.01635	-0.0241	-0.02679	-0.02093	-0.01914	-0.02573	-0.02576
0.02752	0.02168	0.04004	0.0304	0.00655	-0.00556	-0.000320015	0.00596	-0.00862	-0.02786	-0.02449	-0.00597	0.0149	0.03488	0.0427	0.02646	0.00672	0.00459	0.00167	-0.00901	-0.01933	-0.02979	-0.03376	-0.01559	0.00539	0.00575	0.00369	0.0113	0.01397	0.00325	-0.00587	0.00199	0.00836	-0.00504	-0.01791	-0.01242	-0.000374266	0.00963	0.01503	0.01211	0.00664	-0.000896006	-0.00961	-0.0164	-0.02421	-0.02694	-0.02108	-0.01928	-0.02585	-0.02585
0.02771	0.02167	0.04004	0.03048	0.00671	-0.00539	-0.0001787	0.00621	-0.0081	-0.02717	-0.02391	-0.0057	0.01495	0.03495	0.04291	0.02676	0.00698	0.00463	0.00153	-0.00905	-0.01924	-0.02976	-0.03379	-0.01552	0.00551	0.00577	0.00361	0.0112	0.0139	0.00323	-0.00585	0.00206	0.00858	-0.0047	-0.01756	-0.01214	-0.000246716	0.00962	0.01489	0.01185	0.00638	-0.00105	-0.00968	-0.01645	-0.02431	-0.02708	-0.02122	-0.01941	-0.02597	-0.02594
0.02789	0.02166	0.04006	0.03056	0.00686	-0.00522	-3.38078e-05	0.00648	-0.00756	-0.02647	-0.02333	-0.00543	0.01498	0.035	0.0431	0.02705	0.00724	0.00467	0.00139	-0.00909	-0.01915	-0.02972	-0.03383	-0.01546	0.00563	0.00578	0.00352	0.01109	0.01381	0.0032	-0.00584	0.00213	0.00879	-0.00435	-0.01719	-0.01186	-0.000121156	0.0096	0.01474	0.01158	0.00612	-0.0012	-0.00974	-0.0165	-0.0244	-0.02721	-0.02136	-0.01955	-0.02609	-0.02603
0.02808	0.02165	0.04007	0.03065	0.00702	-0.00505	0.000114522	0.00675	-0.00701	-0.02575	-0.02274	-0.00517	0.015	0.03503	0.04328	0.02734	0.00751	0.00472	0.00127	-0.00911	-0.01904	-0.02968	-0.03386	-0.0154	0.00575	0.00579	0.00344	0.01097	0.01372	0.00317	-0.00583	0.00219	0.009	-0.00401	-0.01682	-0.01157	2.09895e-06	0.00958	0.01458	0.0113	0.00585	-0.00136	-0.0098	-0.01654	-0.02449	-0.02734	-0.02149	-0.01969	-0.02622	-0.02612
0.02826	0.02165	0.04009	0.03074	0.00718	-0.00488	0.000266148	0.00702	-0.00644	-0.02502	-0.02215	-0.00491	0.015	0.03504	0.04343	0.02762	0.00779	0.00477	0.00115	-0.00914	-0.01893	-0.02963	-0.03389	-0.01535	0.00585	0.00579	0.00335	0.01085	0.01362	0.00313	-0.00582	0.00225	0.00921	-0.00366	-0.01645	-0.01128	0.000122734	0.00954	0.01442	0.01101	0.00557	-0.00152	-0.00986	-0.01658	-0.02457	-0.02745	-0.02162	-0.01983	-0.02634	-0.02621
0.02844	0.02164	0.04012	0.03083	0.00734	-0.00471	0.000420931	0.00731	-0.00587	-0.02428	-0.02155	-0.00465	0.01499	0.03503	0.04356	0.02789	0.00806	0.00484	0.00104	-0.00915	-0.01882	-0.02958	-0.03393	-0.01531	0.00594	0.00579	0.00325	0.01072	0.01351	0.00308	-0.00582	0.00231	0.00942	-0.00331	-0.01607	-0.01099	0.000240433	0.00951	0.01424	0.01071	0.00529	-0.00168	-0.00992	-0.01661	-0.02463	-0.02756	-0.02174	-0.01997	-0.02647	-0.0263
0.02863	0.02165	0.04015	0.03093	0.0075	-0.00454	0.000578729	0.0076	-0.00529	-0.02353	-0.02094	-0.0044	0.01496	0.03499	0.04368	0.02815	0.00834	0.00491	0.000933561	-0.00915	-0.01869	-0.02953	-0.03396	-0.01527	0.00602	0.00578	0.00316	0.01059	0.01339	0.00303	-0.00582	0.00236	0.00963	-0.00296	-0.01569	-0.0107	0.000354883	0.00946	0.01406	0.0104	0.005	-0.00184	-0.00998	-0.01663	-0.02469	-0.02766	-0.02186	-0.02011	-0.0266	-0.02639
0.02881	0.02165	0.04018	0.03103	0.00766	-0.00436	0.000739404	0.0079	-0.00469	-0.02277	-0.02033	-0.00416	0.01492	0.03494	0.04377	0.0284	0.00863	0.00498	0.000836942	-0.00915	-0.01857	-0.02947	-0.03399	-0.01524	0.0061	0.00577	0.00306	0.01044	0.01326	0.00297	-0.00582	0.00242	0.00984	-0.0026	-0.0153	-0.01041	0.000465773	0.00941	0.01387	0.01009	0.00471	-0.002	-0.01003	-0.01665	-0.02474	-0.02774	-0.02198	-0.02025	-0.02673	-0.02648
0.029	0.02166	0.04022	0.03114	0.00783	-0.00419	0.000902823	0.0082	-0.00409	-0.022	-0.01972	-0.00392	0.01486	0.03486	0.04384	0.02865	0.00892	0.00506	0.000747941	-0.00914	-0.01844	-0.0294	-0.03402	-0.01522	0.00616	0.00575	0.00296	0.0103	0.01312	0.0029	-0.00583	0.00246	0.01005	-0.00224	-0.01491	-0.01011	0.000572819	0.00935	0.01367	0.00977	0.00441	-0.00216	-0.01008	-0.01666	-0.02478	-0.02782	-0.02209	-0.02039	-0.02686	-0.02658
0.02918	0.02166	0.04027	0.03125	0.00799	-0.00401	0.00107	0.00851	-0.00347	-0.02122	-0.0191	-0.00368	0.01479	0.03476	0.04389	0.02888	0.00921	0.00515	0.000666621	-0.00913	-0.0183	-0.02933	-0.03405	-0.0152	0.00621	0.00573	0.00285	0.01014	0.01298	0.00282	-0.00585	0.00251	0.01025	-0.00189	-0.01451	-0.00982	0.000675742	0.00929	0.01346	0.00944	0.0041	-0.00233	-0.01013	-0.01667	-0.02482	-0.02789	-0.0222	-0.02053	-0.027	-0.02667
0.02937	0.02168	0.04032	0.03137	0.00816	-0.00384	0.00124	0.00882	-0.00285	-0.02043	-0.01848	-0.00345	0.01471	0.03464	0.04392	0.02911	0.0095	0.00525	0.000593049	-0.0091	-0.01815	-0.02926	-0.03408	-0.01519	0.00626	0.0057	0.00275	0.00999	0.01282	0.00274	-0.00587	0.00255	0.01045	-0.00153	-0.01411	-0.00952	0.000774266	0.00922	0.01325	0.0091	0.0038	-0.00249	-0.01017	-0.01667	-0.02484	-0.02796	-0.0223	-0.02067	-0.02714	-0.02677
0.02955	0.02169	0.04037	0.03149	0.00833	-0.00366	0.00141	0.00914	-0.00222	-0.01963	-0.01786	-0.00322	0.01461	0.0345	0.04392	0.02932	0.0098	0.00535	0.000527288	-0.00907	-0.01801	-0.02919	-0.03411	-0.01519	0.00629	0.00566	0.00264	0.00982	0.01266	0.00265	-0.00589	0.00259	0.01065	-0.00117	-0.01371	-0.00923	0.00086811	0.00914	0.01302	0.00876	0.00348	-0.00266	-0.01021	-0.01667	-0.02486	-0.02801	-0.0224	-0.02081	-0.02728	-0.02687
0.02974	0.02171	0.04044	0.03161	0.00851	-0.00348	0.00158	0.00947	-0.00158	-0.01883	-0.01723	-0.003	0.0145	0.03433	0.04391	0.02953	0.0101	0.00546	0.000469404	-0.00903	-0.01786	-0.02911	-0.03414	-0.0152	0.00631	0.00563	0.00253	0.00966	0.01249	0.00255	-0.00592	0.00262	0.01085	-0.000803814	-0.0133	-0.00893	0.000956997	0.00905	0.01279	0.0084	0.00317	-0.00282	-0.01025	-0.01666	-0.02486	-0.02806	-0.02249	-0.02096	-0.02742	-0.02697
0.02992	0.02173	0.04051	0.03174	0.00868	-0.0033	0.00176	0.00979	-0.000933703	-0.01802	-0.0166	-0.00278	0.01438	0.03415	0.04388	0.02973	0.0104	0.00557	0.000419463	-0.00899	-0.0177	-0.02903	-0.03417	-0.01521	0.00632	0.00558	0.00241	0.00948	0.01231	0.00244	-0.00595	0.00266	0.01104	-0.000442063	-0.0129	-0.00864	0.00104	0.00896	0.01255	0.00805	0.00285	-0.00299	-0.01028	-0.01664	-0.02486	-0.02809	-0.02258	-0.0211	-0.02757	-0.02707
0.03011	0.02175	0.04058	0.03188	0.00886	-0.00312	0.00193	0.01013	-0.000281045	-0.0172	-0.01597	-0.00257	0.01425	0.03394	0.04382	0.02992	0.01071	0.00569	0.000377528	-0.00894	-0.01754	-0.02895	-0.0342	-0.01524	0.00632	0.00553	0.0023	0.00931	0.01213	0.00233	-0.00599	0.00268	0.01123	-8.01991e-05	-0.01249	-0.00835	0.00112	0.00886	0.0123	0.00768	0.00252	-0.00315	-0.01031	-0.01662	-0.02485	-0.02812	-0.02267	-0.02125	-0.02771	-0.02717
0.03029	0.02178	0.04066	0.03202	0.00904	-0.00294	0.00211	0.01046	0.000377777	-0.01637	-0.01534	-0.00236	0.0141	0.03372	0.04375	0.0301	0.01101	0.00582	0.000343665	-0.00888	-0.01738	-0.02886	-0.03423	-0.01527	0.00631	0.00548	0.00218	0.00912	0.01193	0.0022	-0.00604	0.0027	0.01142	0.000281501	-0.01208	-0.00806	0.00119	0.00875	0.01204	0.00731	0.0022	-0.00332	-0.01034	-0.0166	-0.02484	-0.02814	-0.02275	-0.02139	-0.02787	-0.02728
0.03048	0.02181	0.04075	0.03217	0.00922	-0.00275	0.00229	0.0108	0.00104	-0.01554	-0.01471	-0.00215	0.01394	0.03347	0.04365	0.03026	0.01132	0.00595	0.000317939	-0.00881	-0.01721	-0.02877	-0.03426	-0.01531	0.00629	0.00542	0.00207	0.00894	0.01173	0.00208	-0.00609	0.00272	0.0116	0.000642759	-0.01167	-0.00777	0.00126	0.00863	0.01178	0.00693	0.00187	-0.00348	-0.01037	-0.01656	-0.02481	-0.02815	-0.02283	-0.02154	-0.02802	-0.02738
0.03066	0.02184	0.04084	0.03233	0.00941	-0.00257	0.00248	0.01114	0.00171	-0.01471	-0.01407	-0.00195	0.01377	0.03321	0.04353	0.03042	0.01163	0.00609	0.000300415	-0.00874	-0.01704	-0.02868	-0.03429	-0.01536	0.00625	0.00535	0.00195	0.00875	0.01153	0.00194	-0.00615	0.00273	0.01178	0.001	-0.01126	-0.00748	0.00132	0.00851	0.01151	0.00655	0.00154	-0.00364	-0.01039	-0.01653	-0.02478	-0.02816	-0.02291	-0.02169	-0.02818	-0.02749
0.03085	0.02188	0.04094	0.03249	0.0096	-0.00238	0.00266	0.01149	0.00239	-0.01387	-0.01343	-0.00175	0.01358	0.03292	0.04339	0.03057	0.01194	0.00624	0.000291146	-0.00866	-0.01687	-0.02859	-0.03432	-0.01541	0.00621	0.00528	0.00183	0.00856	0.01131	0.0018	-0.00621	0.00274	0.01196	0.00136	-0.01085	-0.0072	0.00137	0.00838	0.01122	0.00617	0.00121	-0.0038	-0.0104	-0.01648	-0.02473	-0.02816	-0.02299	-0.02184	-0.02834	-0.02761
0.03103	0.02192	0.04105	0.03265	0.00979	-0.00219	0.00284	0.01184	0.00306	-0.01302	-0.0128	-0.00156	0.01339	0.03262	0.04323	0.0307	0.01226	0.00639	0.000290139	-0.00858	-0.01669	-0.02849	-0.03435	-0.01548	0.00615	0.00521	0.00171	0.00836	0.01109	0.00164	-0.00628	0.00274	0.01213	0.00172	-0.01044	-0.00692	0.00142	0.00823	0.01094	0.00577	0.000871467	-0.00396	-0.01042	-0.01644	-0.02468	-0.02815	-0.02306	-0.02199	-0.02851	-0.02772
0.03122	0.02196	0.04116	0.03283	0.00999	-0.002	0.00303	0.01218	0.00375	-0.01218	-0.01216	-0.00137	0.01318	0.03229	0.04304	0.03083	0.01257	0.00655	0.000297391	-0.00849	-0.01651	-0.02839	-0.03439	-0.01555	0.00608	0.00513	0.00159	0.00816	0.01086	0.00149	-0.00636	0.00273	0.0123	0.00208	-0.01002	-0.00665	0.00146	0.00808	0.01064	0.00538	0.000536558	-0.00412	-0.01043	-0.01638	-0.02463	-0.02813	-0.02313	-0.02215	-0.02867	-0.02783
0.0314	0.02201	0.04128	0.03301	0.01019	-0.00181	0.00322	0.01254	0.00443	-0.01133	-0.01152	-0.00119	0.01297	0.03195	0.04284	0.03094	0.01289	0.00671	0.000312897	-0.00839	-0.01633	-0.02829	-0.03442	-0.01564	0.006	0.00504	0.00146	0.00796	0.01063	0.00132	-0.00644	0.00272	0.01246	0.00243	-0.00961	-0.00637	0.00149	0.00793	0.01034	0.00498	0.000200937	-0.00427	-0.01043	-0.01632	-0.02456	-0.0281	-0.0232	-0.0223	-0.02884	-0.02795
0.03158	0.02206	0.04141	0.0332	0.01039	-0.00162	0.00341	0.01289	0.00512	-0.01048	-0.01088	-0.001	0.01274	0.03158	0.04262	0.03105	0.0132	0.00688	0.000336653	-0.00829	-0.01615	-0.02819	-0.03446	-0.01573	0.00591	0.00495	0.00134	0.00775	0.01039	0.00115	-0.00653	0.00271	0.01262	0.00279	-0.00921	-0.00611	0.00151	0.00776	0.01002	0.00457	-0.000135041	-0.00443	-0.01043	-0.01626	-0.02449	-0.02807	-0.02326	-0.02246	-0.02902	-0.02807
0.03177	0.02211	0.04154	0.03339	0.0106	-0.00143	0.00359	0.01324	0.00581	-0.00962	-0.01025	-0.000826296	0.0125	0.0312	0.04237	0.03114	0.01352	0.00706	0.000368655	-0.00818	-0.01597	-0.02809	-0.03449	-0.01583	0.0058	0.00486	0.00122	0.00755	0.01014	0.000967143	-0.00662	0.00268	0.01278	0.00314	-0.0088	-0.00584	0.00153	0.00759	0.00971	0.00416	-0.000471018	-0.00458	-0.01043	-0.01619	-0.02441	-0.02804	-0.02332	-0.02262	-0.0292	-0.0282
0.03195	0.02216	0.04168	0.03359	0.01081	-0.00123	0.00378	0.0136	0.0065	-0.00877	-0.00961	-0.000651585	0.01226	0.0308	0.04211	0.03122	0.01383	0.00724	0.000408898	-0.00806	-0.01578	-0.02799	-0.03453	-0.01594	0.00569	0.00476	0.00109	0.00733	0.00989	0.000780159	-0.00673	0.00266	0.01293	0.00348	-0.00839	-0.00558	0.00154	0.0074	0.00938	0.00375	-0.000806637	-0.00472	-0.01042	-0.01611	-0.02432	-0.02799	-0.02339	-0.02278	-0.02938	-0.02832
0.03214	0.02222	0.04183	0.0338	0.01102	-0.00103	0.00397	0.01395	0.00719	-0.00792	-0.00898	-0.000480186	0.012	0.03038	0.04182	0.03129	0.01415	0.00743	0.000457378	-0.00794	-0.01559	-0.02789	-0.03457	-0.01606	0.00556	0.00465	0.000969042	0.00712	0.00963	0.00058619	-0.00684	0.00262	0.01307	0.00383	-0.00799	-0.00533	0.00154	0.00721	0.00905	0.00334	-0.00114	-0.00487	-0.01041	-0.01603	-0.02423	-0.02794	-0.02345	-0.02295	-0.02956	-0.02845
0.03232	0.02228	0.04198	0.03401	0.01124	-0.000836131	0.00416	0.01431	0.00788	-0.00706	-0.00834	-0.000311983	0.01174	0.02995	0.04151	0.03135	0.01446	0.00762	0.000514092	-0.00782	-0.0154	-0.02778	-0.0346	-0.01619	0.00542	0.00454	0.000843963	0.00691	0.00937	0.0003853	-0.00695	0.00258	0.01321	0.00417	-0.00759	-0.00508	0.00154	0.00701	0.00871	0.00292	-0.00148	-0.00501	-0.01039	-0.01594	-0.02413	-0.02789	-0.02351	-0.02311	-0.02975	-0.02857
0.03251	0.02235	0.04214	0.03423	0.01147	-0.000635546	0.00436	0.01466	0.00857	-0.00621	-0.00771	-0.000146859	0.01146	0.02949	0.04119	0.03139	0.01478	0.00782	0.000579034	-0.00768	-0.01521	-0.02768	-0.03464	-0.01632	0.00526	0.00442	0.000718604	0.00669	0.0091	0.000177552	-0.00707	0.00253	0.01334	0.00451	-0.00719	-0.00484	0.00153	0.00681	0.00837	0.00251	-0.00181	-0.00515	-0.01037	-0.01585	-0.02402	-0.02783	-0.02356	-0.02328	-0.02994	-0.0287
0.03269	0.02242	0.04231	0.03446	0.0117	-0.000433159	0.00455	0.01501	0.00925	-0.00536	-0.00708	1.53005e-05	0.01118	0.02902	0.04084	0.03143	0.01509	0.00802	0.000652201	-0.00755	-0.01502	-0.02758	-0.03469	-0.01647	0.0051	0.0043	0.000593058	0.00647	0.00882	-3.699e-05	-0.0072	0.00247	0.01347	0.00484	-0.0068	-0.0046	0.0015	0.00659	0.00802	0.00209	-0.00214	-0.00528	-0.01035	-0.01576	-0.02391	-0.02776	-0.02362	-0.02345	-0.03013	-0.02884
0.03288	0.02249	0.04248	0.03469	0.01193	-0.000228927	0.00474	0.01537	0.00994	-0.00451	-0.00646	0.00017461	0.01089	0.02854	0.04047	0.03145	0.01541	0.00823	0.000733575	-0.0074	-0.01483	-0.02747	-0.03473	-0.01662	0.00492	0.00418	0.000467412	0.00625	0.00854	-0.000258253	-0.00734	0.00241	0.01359	0.00517	-0.00641	-0.00437	0.00147	0.00637	0.00766	0.00167	-0.00247	-0.00541	-0.01032	-0.01566	-0.02379	-0.02769	-0.02368	-0.02363	-0.03033	-0.02897
0.03306	0.02256	0.04266	0.03494	0.01217	-2.28169e-05	0.00493	0.01572	0.01063	-0.00366	-0.00583	0.000331168	0.0106	0.02804	0.04009	0.03146	0.01572	0.00844	0.000823092	-0.00726	-0.01464	-0.02737	-0.03477	-0.01679	0.00473	0.00404	0.000341732	0.00603	0.00826	-0.000486128	-0.00749	0.00234	0.0137	0.0055	-0.00602	-0.00414	0.00144	0.00614	0.0073	0.00124	-0.00279	-0.00554	-0.01029	-0.01555	-0.02366	-0.02762	-0.02374	-0.0238	-0.03053	-0.02911
0.03325	0.02264	0.04285	0.03519	0.01241	0.000185203	0.00512	0.01606	0.01131	-0.00282	-0.00521	0.00048507	0.0103	0.02752	0.03968	0.03146	0.01603	0.00866	0.000920673	-0.0071	-0.01445	-0.02726	-0.03482	-0.01696	0.00452	0.00391	0.000216077	0.0058	0.00797	-0.000720497	-0.00764	0.00226	0.01381	0.00582	-0.00564	-0.00392	0.00139	0.0059	0.00693	0.000820491	-0.00312	-0.00566	-0.01025	-0.01544	-0.02353	-0.02754	-0.02379	-0.02398	-0.03074	-0.02925
0.03343	0.02272	0.04304	0.03544	0.01266	0.000395164	0.00531	0.01641	0.01199	-0.00198	-0.00459	0.000636412	0.00999	0.02699	0.03926	0.03145	0.01635	0.00889	0.00103	-0.00695	-0.01426	-0.02716	-0.03486	-0.01714	0.00431	0.00376	9.05083e-05	0.00558	0.00768	-0.000961243	-0.0078	0.00218	0.01391	0.00613	-0.00526	-0.00371	0.00133	0.00565	0.00656	0.000397431	-0.00344	-0.00577	-0.0102	-0.01533	-0.0234	-0.02745	-0.02385	-0.02416	-0.03094	-0.02939
0.03362	0.0228	0.04324	0.03571	0.01291	0.000607097	0.0055	0.01676	0.01266	-0.00114	-0.00397	0.00078529	0.00967	0.02644	0.03881	0.03143	0.01666	0.00912	0.00114	-0.00678	-0.01407	-0.02706	-0.03491	-0.01734	0.00408	0.00362	-3.49141e-05	0.00535	0.00738	-0.00121	-0.00797	0.00209	0.01401	0.00645	-0.00488	-0.00351	0.00127	0.00539	0.00619	-2.55592e-05	-0.00375	-0.00589	-0.01016	-0.01521	-0.02326	-0.02737	-0.02391	-0.02435	-0.03115	-0.02953
0.0338	0.02289	0.04344	0.03598	0.01316	0.000821032	0.00569	0.0171	0.01333	-0.000311751	-0.00336	0.000931798	0.00935	0.02587	0.03835	0.0314	0.01697	0.00935	0.00126	-0.00662	-0.01388	-0.02695	-0.03496	-0.01754	0.00384	0.00346	-0.00016013	0.00512	0.00708	-0.00146	-0.00814	0.00199	0.01409	0.00675	-0.00451	-0.00331	0.0012	0.00513	0.0058	-0.000448122	-0.00407	-0.00599	-0.0101	-0.01508	-0.02311	-0.02728	-0.02396	-0.02453	-0.03136	-0.02967
0.03399	0.02298	0.04365	0.03625	0.01343	0.00104	0.00588	0.01743	0.014	0.000513795	-0.00275	0.00108	0.00903	0.0253	0.03787	0.03135	0.01727	0.00959	0.00139	-0.00644	-0.01369	-0.02685	-0.03501	-0.01775	0.00359	0.00331	-0.000285079	0.00489	0.00678	-0.00172	-0.00832	0.00188	0.01417	0.00705	-0.00415	-0.00312	0.00112	0.00486	0.00542	-0.000869904	-0.00438	-0.0061	-0.01005	-0.01495	-0.02296	-0.02718	-0.02402	-0.02472	-0.03157	-0.02982
0.03417	0.02307	0.04387	0.03654	0.01369	0.00126	0.00607	0.01777	0.01466	0.00133	-0.00215	0.00122	0.00869	0.02471	0.03737	0.0313	0.01758	0.00983	0.00153	-0.00627	-0.01351	-0.02675	-0.03506	-0.01796	0.00333	0.00315	-0.000409701	0.00466	0.00647	-0.00199	-0.00851	0.00176	0.01424	0.00735	-0.00379	-0.00294	0.00103	0.00459	0.00503	-0.00129	-0.00468	-0.00619	-0.00999	-0.01482	-0.0228	-0.02709	-0.02408	-0.02491	-0.03179	-0.02996
0.03436	0.02316	0.04409	0.03683	0.01396	0.00148	0.00626	0.0181	0.01531	0.00215	-0.00155	0.00136	0.00836	0.0241	0.03686	0.03123	0.01789	0.01008	0.00167	-0.00609	-0.01332	-0.02665	-0.03512	-0.01819	0.00305	0.00298	-0.000533935	0.00443	0.00616	-0.00226	-0.00871	0.00164	0.01431	0.00763	-0.00344	-0.00276	0.000930714	0.0043	0.00464	-0.00171	-0.00498	-0.00628	-0.00992	-0.01468	-0.02264	-0.02699	-0.02414	-0.02511	-0.03201	-0.03011
0.03454	0.02326	0.04432	0.03713	0.01424	0.0017	0.00645	0.01843	0.01596	0.00295	-0.000958542	0.0015	0.00802	0.02349	0.03633	0.03116	0.01819	0.01034	0.00182	-0.00591	-0.01313	-0.02655	-0.03517	-0.01843	0.00276	0.00281	-0.000657722	0.0042	0.00584	-0.00253	-0.00891	0.0015	0.01437	0.00792	-0.0031	-0.00259	0.000825071	0.00401	0.00424	-0.00213	-0.00528	-0.00637	-0.00985	-0.01454	-0.02248	-0.02689	-0.0242	-0.02531	-0.03223	-0.03026
0.03472	0.02335	0.04456	0.03744	0.01452	0.00192	0.00663	0.01875	0.0166	0.00375	-0.000369589	0.00163	0.00768	0.02286	0.03578	0.03107	0.01849	0.01059	0.00198	-0.00572	-0.01295	-0.02645	-0.03523	-0.01867	0.00247	0.00263	-0.000781002	0.00397	0.00552	-0.00282	-0.00913	0.00136	0.01442	0.00819	-0.00276	-0.00244	0.000711041	0.00372	0.00385	-0.00254	-0.00557	-0.00645	-0.00977	-0.0144	-0.02231	-0.02679	-0.02426	-0.02551	-0.03245	-0.03041
0.03491	0.02346	0.0448	0.03775	0.01481	0.00215	0.00682	0.01906	0.01723	0.00454	0.000213984	0.00177	0.00733	0.02222	0.03521	0.03097	0.0188	0.01086	0.00215	-0.00553	-0.01276	-0.02635	-0.03529	-0.01892	0.00216	0.00245	-0.000903717	0.00374	0.0052	-0.0031	-0.00935	0.00121	0.01446	0.00846	-0.00243	-0.00228	0.000588651	0.00341	0.00344	-0.00295	-0.00585	-0.00652	-0.00969	-0.01425	-0.02214	-0.02668	-0.02433	-0.02571	-0.03268	-0.03056
0.03509	0.02356	0.04504	0.03807	0.0151	0.00238	0.007	0.01938	0.01786	0.00533	0.000791931	0.0019	0.00698	0.02157	0.03463	0.03086	0.01909	0.01112	0.00232	-0.00533	-0.01258	-0.02626	-0.03535	-0.01918	0.00183	0.00227	-0.00103	0.00351	0.00488	-0.0034	-0.00957	0.00105	0.01449	0.00872	-0.0021	-0.00214	0.000458034	0.00311	0.00304	-0.00336	-0.00613	-0.00659	-0.0096	-0.0141	-0.02196	-0.02658	-0.0244	-0.02591	-0.0329	-0.03071
0.03528	0.02366	0.04529	0.03839	0.0154	0.00261	0.00718	0.01968	0.01847	0.0061	0.00136	0.00203	0.00662	0.02091	0.03403	0.03074	0.01939	0.01139	0.0025	-0.00513	-0.0124	-0.02617	-0.03541	-0.01945	0.0015	0.00208	-0.00115	0.00328	0.00455	-0.00369	-0.00981	0.000882402	0.01451	0.00897	-0.00178	-0.00201	0.000319348	0.00279	0.00264	-0.00377	-0.0064	-0.00665	-0.00951	-0.01394	-0.02178	-0.02647	-0.02446	-0.02612	-0.03313	-0.03086
0.03546	0.02377	0.04555	0.03872	0.0157	0.00284	0.00737	0.01998	0.01908	0.00686	0.00193	0.00216	0.00627	0.02023	0.03342	0.03062	0.01969	0.01167	0.00269	-0.00493	-0.01222	-0.02607	-0.03547	-0.01972	0.00116	0.00188	-0.00127	0.00305	0.00422	-0.004	-0.01005	0.000705217	0.01453	0.00922	-0.00147	-0.00188	0.000172751	0.00247	0.00223	-0.00417	-0.00667	-0.00671	-0.00942	-0.01378	-0.0216	-0.02636	-0.02453	-0.02633	-0.03335	-0.03101
0.03565	0.02388	0.04581	0.03906	0.01601	0.00308	0.00754	0.02028	0.01967	0.00762	0.00249	0.00229	0.00591	0.01955	0.03279	0.03048	0.01998	0.01194	0.00289	-0.00473	-0.01205	-0.02598	-0.03553	-0.02001	0.000804193	0.00168	-0.00139	0.00282	0.00389	-0.0043	-0.0103	0.000519034	0.01453	0.00946	-0.00117	-0.00176	1.84013e-05	0.00215	0.00182	-0.00457	-0.00693	-0.00676	-0.00931	-0.01362	-0.02142	-0.02625	-0.02461	-0.02654	-0.03358	-0.03116
0.03583	0.02399	0.04607	0.03941	0.01632	0.00331	0.00772	0.02056	0.02026	0.00836	0.00304	0.00241	0.00555	0.01886	0.03215	0.03033	0.02027	0.01223	0.00309	-0.00452	-0.01187	-0.02589	-0.0356	-0.0203	0.000440107	0.00148	-0.00151	0.00259	0.00356	-0.00462	-0.01056	0.000323775	0.01453	0.00969	-0.000874076	-0.00165	-0.000143542	0.00182	0.00141	-0.00497	-0.00718	-0.0068	-0.00921	-0.01345	-0.02123	-0.02614	-0.02468	-0.02675	-0.03381	-0.03131
0.03602	0.0241	0.04634	0.03976	0.01664	0.00355	0.0079	0.02085	0.02084	0.0091	0.00359	0.00254	0.00519	0.01815	0.03149	0.03017	0.02056	0.01251	0.00329	-0.00431	-0.0117	-0.02581	-0.03567	-0.02059	6.5995e-05	0.00128	-0.00163	0.00236	0.00323	-0.00493	-0.01082	0.000119363	0.01452	0.00991	-0.000586983	-0.00155	-0.000312921	0.00148	0.00101	-0.00536	-0.00743	-0.00684	-0.0091	-0.01328	-0.02104	-0.02603	-0.02476	-0.02697	-0.03404	-0.03146
0.0362	0.02422	0.04661	0.04011	0.01696	0.00379	0.00807	0.02112	0.0214	0.00982	0.00413	0.00266	0.00483	0.01744	0.03082	0.03	0.02085	0.0128	0.00351	-0.0041	-0.01153	-0.02572	-0.03574	-0.0209	-0.000317891	0.00107	-0.00174	0.00213	0.00289	-0.00525	-0.0111	-9.42794e-05	0.0145	0.01012	-0.000308096	-0.00146	-0.000489576	0.00114	0.000597275	-0.00574	-0.00767	-0.00687	-0.00898	-0.01311	-0.02084	-0.02592	-0.02484	-0.02719	-0.03427	-0.03161
0.03639	0.02433	0.04689	0.04047	0.01729	0.00403	0.00824	0.02139	0.02196	0.01053	0.00466	0.00278	0.00447	0.01673	0.03014	0.02983	0.02113	0.01309	0.00373	-0.00388	-0.01136	-0.02564	-0.03581	-0.02121	-0.000711298	0.000851419	-0.00186	0.0019	0.00255	-0.00558	-0.01138	-0.00031723	0.01447	0.01033	-3.76139e-05	-0.00138	-0.00067335	0.00079989	0.00018908	-0.00612	-0.0079	-0.00689	-0.00886	-0.01293	-0.02065	-0.02581	-0.02492	-0.0274	-0.0345	-0.03176
0.03657	0.02445	0.04717	0.04084	0.01762	0.00428	0.00841	0.02165	0.0225	0.01123	0.00518	0.0029	0.0041	0.016	0.02944	0.02964	0.02142	0.01339	0.00395	-0.00366	-0.0112	-0.02556	-0.03588	-0.02153	-0.00111	0.000634153	-0.00198	0.00167	0.00221	-0.00591	-0.01167	-0.000549565	0.01443	0.01052	0.000224263	-0.0013	-0.000864084	0.000453664	-0.000218373	-0.0065	-0.00813	-0.0069	-0.00874	-0.01275	-0.02045	-0.0257	-0.025	-0.02763	-0.03473	-0.0319
0.03676	0.02457	0.04745	0.04121	0.01795	0.00453	0.00858	0.0219	0.02303	0.01192	0.0057	0.00302	0.00374	0.01527	0.02873	0.02945	0.0217	0.01369	0.00418	-0.00344	-0.01103	-0.02548	-0.03595	-0.02185	-0.00153	0.000413409	-0.00209	0.00144	0.00188	-0.00624	-0.01196	-0.000791362	0.01438	0.01071	0.000477337	-0.00124	-0.00106	0.00010414	-0.000624713	-0.00687	-0.00834	-0.00691	-0.0086	-0.01257	-0.02025	-0.02559	-0.02509	-0.02785	-0.03495	-0.03205
0.03694	0.02469	0.04774	0.04159	0.01829	0.00477	0.00875	0.02214	0.02355	0.01259	0.00621	0.00314	0.00337	0.01453	0.02801	0.02925	0.02197	0.01399	0.00442	-0.00322	-0.01087	-0.0254	-0.03603	-0.02218	-0.00195	0.000189308	-0.00221	0.00122	0.00153	-0.00658	-0.01226	-0.00104	0.01432	0.01089	0.000721426	-0.00118	-0.00127	-0.000248369	-0.00103	-0.00723	-0.00855	-0.00692	-0.00847	-0.01238	-0.02005	-0.02548	-0.02518	-0.02807	-0.03518	-0.03219
0.03713	0.02481	0.04803	0.04197	0.01864	0.00502	0.00891	0.02238	0.02405	0.01325	0.00671	0.00325	0.00301	0.01378	0.02728	0.02903	0.02225	0.01429	0.00466	-0.003	-0.01072	-0.02533	-0.0361	-0.02252	-0.00237	-3.80097e-05	-0.00232	0.000992113	0.00119	-0.00692	-0.01257	-0.0013	0.01426	0.01106	0.000956422	-0.00113	-0.00148	-0.000603511	-0.00143	-0.00759	-0.00875	-0.00691	-0.00833	-0.01219	-0.01985	-0.02537	-0.02527	-0.02829	-0.0354	-0.03234
0.03731	0.02493	0.04832	0.04236	0.01899	0.00527	0.00907	0.0226	0.02454	0.0139	0.0072	0.00337	0.00265	0.01303	0.02654	0.02882	0.02252	0.0146	0.00491	-0.00277	-0.01056	-0.02525	-0.03618	-0.02286	-0.00281	-0.000268397	-0.00243	0.000767553	0.000852107	-0.00726	-0.01289	-0.00157	0.01418	0.01122	0.00118	-0.00109	-0.00169	-0.000960925	-0.00183	-0.00794	-0.00895	-0.0069	-0.00819	-0.012	-0.01964	-0.02526	-0.02536	-0.02852	-0.03563	-0.03248
0.0375	0.02505	0.04861	0.04275	0.01934	0.00553	0.00923	0.02282	0.02502	0.01453	0.00768	0.00348	0.00228	0.01227	0.02579	0.02859	0.02279	0.01491	0.00516	-0.00255	-0.01041	-0.02518	-0.03626	-0.02321	-0.00326	-0.000501708	-0.00254	0.000544071	0.000510262	-0.00761	-0.01321	-0.00185	0.01409	0.01137	0.0014	-0.00106	-0.00192	-0.00132	-0.00223	-0.00828	-0.00913	-0.00688	-0.00804	-0.01181	-0.01944	-0.02516	-0.02546	-0.02874	-0.03585	-0.03261
0.03768	0.02518	0.04891	0.04314	0.0197	0.00578	0.00938	0.02303	0.02549	0.01516	0.00816	0.00359	0.00192	0.01151	0.02503	0.02836	0.02306	0.01522	0.00542	-0.00232	-0.01026	-0.02512	-0.03633	-0.02356	-0.00371	-0.000737795	-0.00266	0.000321732	0.000168266	-0.00796	-0.01354	-0.00214	0.01399	0.01151	0.00161	-0.00104	-0.00214	-0.00168	-0.00263	-0.00862	-0.00931	-0.00685	-0.00788	-0.01161	-0.01923	-0.02505	-0.02556	-0.02897	-0.03606	-0.03275
0.03786	0.0253	0.04921	0.04354	0.02005	0.00603	0.00954	0.02323	0.02594	0.01576	0.00863	0.0037	0.00156	0.01074	0.02425	0.02811	0.02333	0.01553	0.00568	-0.00209	-0.01011	-0.02505	-0.03641	-0.02391	-0.00417	-0.000976513	-0.00277	0.000100599	-0.00017371	-0.00831	-0.01388	-0.00244	0.01388	0.01164	0.0018	-0.00102	-0.00238	-0.00204	-0.00302	-0.00894	-0.00948	-0.00682	-0.00772	-0.01141	-0.01902	-0.02495	-0.02566	-0.02919	-0.03628	-0.03288
0.03805	0.02542	0.04951	0.04394	0.02042	0.00629	0.00968	0.02343	0.02637	0.01635	0.00908	0.00381	0.0012	0.00997	0.02347	0.02786	0.02359	0.01585	0.00594	-0.00186	-0.00997	-0.02498	-0.0365	-0.02427	-0.00463	-0.00122	-0.00287	-0.000119265	-0.0005155	-0.00867	-0.01422	-0.00275	0.01377	0.01176	0.00199	-0.00102	-0.00262	-0.00241	-0.00341	-0.00926	-0.00964	-0.00678	-0.00756	-0.01121	-0.01881	-0.02484	-0.02576	-0.02942	-0.03649	-0.03301
0.03823	0.02555	0.04981	0.04434	0.02078	0.00655	0.00983	0.02361	0.0268	0.01693	0.00953	0.00392	0.000847116	0.00919	0.02268	0.02761	0.02385	0.01617	0.00621	-0.00163	-0.00983	-0.02492	-0.03658	-0.02464	-0.0051	-0.00146	-0.00298	-0.000337795	-0.000856932	-0.00903	-0.01457	-0.00307	0.01364	0.01187	0.00217	-0.00102	-0.00286	-0.00277	-0.00379	-0.00958	-0.00979	-0.00674	-0.00739	-0.011	-0.01859	-0.02474	-0.02587	-0.02964	-0.0367	-0.03314
0.03842	0.02567	0.05011	0.04475	0.02115	0.0068	0.00997	0.02378	0.0272	0.0175	0.00997	0.00402	0.000492065	0.00842	0.02188	0.02735	0.02411	0.01649	0.00648	-0.0014	-0.00969	-0.02486	-0.03666	-0.02501	-0.00558	-0.00171	-0.00309	-0.000554927	-0.0012	-0.00939	-0.01493	-0.00339	0.0135	0.01197	0.00234	-0.00103	-0.00311	-0.00313	-0.00417	-0.00988	-0.00994	-0.00669	-0.00722	-0.01079	-0.01838	-0.02464	-0.02598	-0.02987	-0.03691	-0.03326
0.0386	0.02579	0.05041	0.04515	0.02152	0.00706	0.01011	0.02395	0.0276	0.01804	0.0104	0.00413	0.000139172	0.00764	0.02108	0.02708	0.02437	0.01681	0.00676	-0.00117	-0.00955	-0.0248	-0.03674	-0.02538	-0.00607	-0.00195	-0.00319	-0.000770599	-0.00154	-0.00975	-0.01529	-0.00373	0.01335	0.01206	0.0025	-0.00105	-0.00336	-0.0035	-0.00454	-0.01018	-0.01007	-0.00663	-0.00705	-0.01058	-0.01817	-0.02454	-0.02609	-0.03009	-0.03711	-0.03338
0.03879	0.02591	0.05071	0.04556	0.02189	0.00732	0.01025	0.0241	0.02797	0.01858	0.01082	0.00423	-0.00021133	0.00685	0.02027	0.0268	0.02462	0.01713	0.00704	-0.000936247	-0.00942	-0.02475	-0.03683	-0.02576	-0.00655	-0.0022	-0.0033	-0.000984746	-0.00188	-0.01011	-0.01566	-0.00408	0.01319	0.01214	0.00265	-0.00107	-0.00362	-0.00386	-0.00491	-0.01046	-0.0102	-0.00656	-0.00687	-0.01037	-0.01795	-0.02444	-0.0262	-0.03031	-0.0373	-0.0335
0.03897	0.02604	0.05101	0.04597	0.02227	0.00758	0.01039	0.02424	0.02833	0.0191	0.01123	0.00433	-0.00055923	0.00607	0.01945	0.02652	0.02487	0.01745	0.00732	-0.000704584	-0.00929	-0.02469	-0.03691	-0.02613	-0.00705	-0.00246	-0.0034	-0.0012	-0.00222	-0.01048	-0.01604	-0.00443	0.01302	0.01221	0.00279	-0.00111	-0.00388	-0.00422	-0.00528	-0.01074	-0.01032	-0.00649	-0.00669	-0.01015	-0.01773	-0.02434	-0.02631	-0.03053	-0.0375	-0.03361
0.03916	0.02616	0.05131	0.04638	0.02264	0.00784	0.01052	0.02438	0.02868	0.0196	0.01163	0.00444	-0.000904392	0.00528	0.01862	0.02624	0.02512	0.01777	0.0076	-0.000473064	-0.00916	-0.02464	-0.037	-0.02652	-0.00754	-0.00271	-0.00351	-0.00141	-0.00255	-0.01084	-0.01642	-0.00479	0.01284	0.01227	0.00292	-0.00115	-0.00414	-0.00458	-0.00564	-0.01101	-0.01042	-0.00642	-0.0065	-0.00993	-0.01752	-0.02425	-0.02643	-0.03075	-0.03768	-0.03372
0.03934	0.02628	0.05161	0.0468	0.02302	0.0081	0.01064	0.0245	0.02901	0.02008	0.01202	0.00454	-0.00125	0.00449	0.01779	0.02595	0.02536	0.0181	0.00789	-0.000241877	-0.00904	-0.02459	-0.03709	-0.0269	-0.00805	-0.00296	-0.00361	-0.00162	-0.00289	-0.01121	-0.01681	-0.00517	0.01265	0.01232	0.00303	-0.0012	-0.00441	-0.00494	-0.00599	-0.01127	-0.01052	-0.00633	-0.00631	-0.00971	-0.0173	-0.02415	-0.02654	-0.03097	-0.03787	-0.03382
0.03953	0.0264	0.05191	0.04721	0.0234	0.00836	0.01077	0.02462	0.02933	0.02056	0.01241	0.00463	-0.00159	0.0037	0.01695	0.02565	0.0256	0.01842	0.00817	-1.12162e-05	-0.00892	-0.02454	-0.03717	-0.02728	-0.00855	-0.00322	-0.00371	-0.00182	-0.00322	-0.01158	-0.0172	-0.00555	0.01245	0.01236	0.00314	-0.00125	-0.00468	-0.0053	-0.00633	-0.01152	-0.01062	-0.00624	-0.00611	-0.00949	-0.01708	-0.02406	-0.02666	-0.03119	-0.03804	-0.03392
0.03971	0.02652	0.05221	0.04762	0.02378	0.00862	0.01089	0.02472	0.02962	0.02101	0.01278	0.00473	-0.00192	0.00291	0.01611	0.02535	0.02584	0.01875	0.00846	0.000218728	-0.0088	-0.02449	-0.03726	-0.02767	-0.00906	-0.00348	-0.00381	-0.00203	-0.00356	-0.01195	-0.0176	-0.00594	0.01224	0.01239	0.00324	-0.00132	-0.00495	-0.00565	-0.00667	-0.01176	-0.0107	-0.00615	-0.00591	-0.00926	-0.01685	-0.02397	-0.02678	-0.0314	-0.03821	-0.03401
0.0399	0.02663	0.0525	0.04804	0.02416	0.00888	0.011	0.02482	0.02991	0.02145	0.01314	0.00483	-0.00226	0.00213	0.01526	0.02504	0.02608	0.01907	0.00875	0.000447762	-0.00868	-0.02445	-0.03735	-0.02806	-0.00957	-0.00373	-0.00391	-0.00223	-0.00389	-0.01232	-0.018	-0.00634	0.01202	0.0124	0.00333	-0.00139	-0.00522	-0.006	-0.007	-0.01199	-0.01077	-0.00605	-0.00571	-0.00903	-0.01663	-0.02387	-0.0269	-0.03161	-0.03838	-0.0341
0.04008	0.02675	0.0528	0.04845	0.02454	0.00913	0.01112	0.02491	0.03017	0.02187	0.01349	0.00492	-0.00259	0.00134	0.01441	0.02473	0.02631	0.01939	0.00904	0.000675696	-0.00857	-0.02441	-0.03744	-0.02845	-0.01009	-0.00399	-0.00401	-0.00244	-0.00421	-0.01269	-0.01841	-0.00675	0.01179	0.01241	0.00341	-0.00147	-0.0055	-0.00635	-0.00733	-0.01221	-0.01084	-0.00594	-0.00551	-0.0088	-0.01641	-0.02378	-0.02702	-0.03182	-0.03854	-0.03418
0.04027	0.02686	0.05309	0.04886	0.02493	0.00939	0.01122	0.02498	0.03043	0.02228	0.01384	0.00501	-0.00291	0.000548699	0.01356	0.02441	0.02654	0.01972	0.00934	0.000902338	-0.00846	-0.02436	-0.03753	-0.02884	-0.0106	-0.00425	-0.0041	-0.00264	-0.00454	-0.01306	-0.01882	-0.00716	0.01155	0.01241	0.00348	-0.00155	-0.00578	-0.0067	-0.00764	-0.01243	-0.0109	-0.00583	-0.0053	-0.00857	-0.01618	-0.02369	-0.02714	-0.03202	-0.03869	-0.03426
0.04045	0.02698	0.05337	0.04927	0.02531	0.00965	0.01133	0.02505	0.03066	0.02267	0.01417	0.00511	-0.00323	-0.000238422	0.01271	0.02409	0.02676	0.02004	0.00963	0.00113	-0.00835	-0.02432	-0.03762	-0.02923	-0.01112	-0.00451	-0.0042	-0.00283	-0.00487	-0.01343	-0.01924	-0.00758	0.0113	0.01239	0.00354	-0.00164	-0.00606	-0.00704	-0.00795	-0.01263	-0.01095	-0.00571	-0.00509	-0.00833	-0.01595	-0.0236	-0.02726	-0.03222	-0.03883	-0.03433
0.04064	0.02709	0.05366	0.04967	0.02569	0.0099	0.01143	0.0251	0.03088	0.02305	0.0145	0.0052	-0.00355	-0.00102	0.01185	0.02377	0.02699	0.02036	0.00992	0.00135	-0.00824	-0.02428	-0.03771	-0.02963	-0.01164	-0.00477	-0.00429	-0.00303	-0.00519	-0.01381	-0.01966	-0.00802	0.01104	0.01237	0.00359	-0.00174	-0.00634	-0.00738	-0.00825	-0.01282	-0.01099	-0.00559	-0.00487	-0.00809	-0.01572	-0.02351	-0.02739	-0.03241	-0.03897	-0.0344
0.04082	0.0272	0.05394	0.05008	0.02607	0.01016	0.01153	0.02515	0.03108	0.02341	0.01481	0.00528	-0.00387	-0.00181	0.01099	0.02344	0.0272	0.02068	0.01021	0.00157	-0.00814	-0.02425	-0.0378	-0.03002	-0.01216	-0.00503	-0.00439	-0.00322	-0.00551	-0.01418	-0.02008	-0.00846	0.01078	0.01233	0.00364	-0.00184	-0.00662	-0.00771	-0.00854	-0.013	-0.01102	-0.00547	-0.00466	-0.00785	-0.01549	-0.02343	-0.02751	-0.03261	-0.0391	-0.03446
0.041	0.0273	0.05422	0.05048	0.02645	0.01041	0.01162	0.02518	0.03127	0.02376	0.01511	0.00537	-0.00418	-0.00259	0.01012	0.02311	0.02742	0.021	0.0105	0.00179	-0.00804	-0.02421	-0.03788	-0.03041	-0.01268	-0.00529	-0.00448	-0.00341	-0.00582	-0.01455	-0.02051	-0.0089	0.0105	0.01229	0.00367	-0.00195	-0.0069	-0.00804	-0.00882	-0.01317	-0.01104	-0.00534	-0.00444	-0.00761	-0.01526	-0.02334	-0.02763	-0.03279	-0.03923	-0.03451
0.04119	0.02741	0.05449	0.05088	0.02683	0.01066	0.01171	0.0252	0.03144	0.02408	0.01541	0.00546	-0.00449	-0.00337	0.00926	0.02278	0.02763	0.02131	0.01079	0.00201	-0.00794	-0.02418	-0.03797	-0.0308	-0.0132	-0.00555	-0.00457	-0.0036	-0.00614	-0.01492	-0.02095	-0.00936	0.01021	0.01223	0.00369	-0.00207	-0.00718	-0.00836	-0.0091	-0.01332	-0.01106	-0.0052	-0.00422	-0.00736	-0.01503	-0.02325	-0.02775	-0.03298	-0.03934	-0.03456
0.04137	0.02751	0.05476	0.05128	0.0272	0.01091	0.01179	0.02522	0.0316	0.0244	0.01569	0.00554	-0.00479	-0.00415	0.0084	0.02245	0.02784	0.02163	0.01108	0.00222	-0.00785	-0.02415	-0.03806	-0.03119	-0.01372	-0.00581	-0.00466	-0.00379	-0.00645	-0.01528	-0.02138	-0.00982	0.00991	0.01217	0.0037	-0.00219	-0.00746	-0.00868	-0.00936	-0.01347	-0.01107	-0.00506	-0.00399	-0.00711	-0.01479	-0.02316	-0.02786	-0.03315	-0.03945	-0.0346
0.04156	0.02761	0.05503	0.05167	0.02758	0.01115	0.01187	0.02522	0.03174	0.02469	0.01597	0.00562	-0.00509	-0.00492	0.00753	0.02211	0.02804	0.02194	0.01136	0.00244	-0.00775	-0.02411	-0.03815	-0.03159	-0.01424	-0.00607	-0.00475	-0.00397	-0.00675	-0.01565	-0.02182	-0.01029	0.0096	0.01209	0.00371	-0.00231	-0.00774	-0.00899	-0.00962	-0.01361	-0.01107	-0.00492	-0.00377	-0.00686	-0.01456	-0.02307	-0.02798	-0.03333	-0.03955	-0.03464
0.04174	0.02771	0.05529	0.05206	0.02795	0.0114	0.01194	0.02522	0.03186	0.02498	0.01623	0.0057	-0.00539	-0.00569	0.00667	0.02176	0.02824	0.02224	0.01165	0.00265	-0.00766	-0.02408	-0.03824	-0.03197	-0.01476	-0.00632	-0.00484	-0.00415	-0.00706	-0.01602	-0.02227	-0.01077	0.00929	0.01201	0.0037	-0.00244	-0.00802	-0.0093	-0.00986	-0.01374	-0.01106	-0.00477	-0.00354	-0.00661	-0.01432	-0.02298	-0.0281	-0.03349	-0.03964	-0.03467
0.04193	0.0278	0.05555	0.05245	0.02832	0.01164	0.01201	0.0252	0.03197	0.02524	0.01649	0.00578	-0.00568	-0.00646	0.0058	0.02142	0.02844	0.02255	0.01193	0.00285	-0.00757	-0.02406	-0.03833	-0.03236	-0.01527	-0.00658	-0.00493	-0.00433	-0.00736	-0.01638	-0.02271	-0.01125	0.00896	0.01191	0.00369	-0.00258	-0.0083	-0.0096	-0.0101	-0.01385	-0.01105	-0.00462	-0.00331	-0.00635	-0.01408	-0.02289	-0.02821	-0.03366	-0.03972	-0.03469
0.04211	0.0279	0.0558	0.05283	0.02868	0.01187	0.01208	0.02517	0.03206	0.02549	0.01673	0.00586	-0.00597	-0.00722	0.00494	0.02108	0.02863	0.02285	0.0122	0.00305	-0.00749	-0.02403	-0.03842	-0.03275	-0.01579	-0.00683	-0.00501	-0.00451	-0.00765	-0.01674	-0.02316	-0.01174	0.00863	0.01181	0.00367	-0.00272	-0.00858	-0.0099	-0.01032	-0.01396	-0.01102	-0.00447	-0.00307	-0.0061	-0.01383	-0.0228	-0.02832	-0.03381	-0.03979	-0.03471
0.0423	0.02798	0.05604	0.05321	0.02905	0.01211	0.01214	0.02514	0.03214	0.02573	0.01697	0.00594	-0.00625	-0.00798	0.00408	0.02073	0.02882	0.02315	0.01248	0.00325	-0.00741	-0.024	-0.03851	-0.03313	-0.0163	-0.00709	-0.0051	-0.00468	-0.00795	-0.0171	-0.02361	-0.01223	0.00828	0.01169	0.00364	-0.00286	-0.00886	-0.01019	-0.01054	-0.01405	-0.01099	-0.00431	-0.00284	-0.00584	-0.01359	-0.0227	-0.02843	-0.03396	-0.03986	-0.03472
0.04248	0.02807	0.05628	0.05358	0.02941	0.01234	0.01219	0.02509	0.0322	0.02595	0.0172	0.00601	-0.00653	-0.00873	0.00322	0.02038	0.029	0.02344	0.01275	0.00345	-0.00733	-0.02397	-0.0386	-0.03351	-0.01681	-0.00734	-0.00518	-0.00485	-0.00824	-0.01746	-0.02406	-0.01273	0.00793	0.01157	0.0036	-0.00301	-0.00913	-0.01047	-0.01074	-0.01413	-0.01096	-0.00415	-0.0026	-0.00557	-0.01334	-0.02261	-0.02854	-0.0341	-0.03991	-0.03472
0.04267	0.02815	0.05652	0.05394	0.02977	0.01257	0.01225	0.02504	0.03224	0.02615	0.01741	0.00608	-0.00681	-0.00948	0.00236	0.02003	0.02918	0.02373	0.01301	0.00364	-0.00725	-0.02395	-0.03869	-0.03389	-0.01732	-0.00759	-0.00526	-0.00502	-0.00852	-0.01782	-0.02452	-0.01324	0.00757	0.01143	0.00355	-0.00316	-0.0094	-0.01075	-0.01094	-0.0142	-0.01091	-0.00399	-0.00237	-0.00531	-0.01309	-0.02251	-0.02864	-0.03424	-0.03996	-0.03472
0.04285	0.02823	0.05674	0.0543	0.03012	0.01279	0.01229	0.02497	0.03227	0.02634	0.01762	0.00615	-0.00708	-0.01023	0.0015	0.01967	0.02935	0.02401	0.01328	0.00383	-0.00717	-0.02392	-0.03877	-0.03427	-0.01782	-0.00784	-0.00534	-0.00518	-0.0088	-0.01817	-0.02497	-0.01375	0.00721	0.01129	0.0035	-0.00331	-0.00967	-0.01101	-0.01112	-0.01426	-0.01086	-0.00383	-0.00213	-0.00504	-0.01283	-0.02241	-0.02874	-0.03437	-0.03999	-0.03471
0.04304	0.02831	0.05697	0.05466	0.03047	0.01301	0.01233	0.02489	0.03229	0.02651	0.01782	0.00622	-0.00735	-0.01097	0.000652554	0.01932	0.02952	0.02429	0.01353	0.00401	-0.0071	-0.0239	-0.03886	-0.03464	-0.01832	-0.00809	-0.00542	-0.00534	-0.00908	-0.01852	-0.02543	-0.01427	0.00683	0.01114	0.00344	-0.00347	-0.00993	-0.01127	-0.01129	-0.01431	-0.0108	-0.00366	-0.00189	-0.00477	-0.01257	-0.02231	-0.02883	-0.03449	-0.04002	-0.03469
0.04322	0.02839	0.05718	0.05501	0.03081	0.01323	0.01236	0.02481	0.03229	0.02667	0.01801	0.00628	-0.00762	-0.0117	-0.00019612	0.01897	0.02969	0.02457	0.01379	0.00419	-0.00703	-0.02388	-0.03895	-0.03501	-0.01882	-0.00833	-0.0055	-0.0055	-0.00935	-0.01887	-0.02589	-0.01479	0.00645	0.01098	0.00337	-0.00362	-0.0102	-0.01153	-0.01146	-0.01435	-0.01074	-0.00349	-0.00165	-0.0045	-0.01231	-0.02221	-0.02892	-0.0346	-0.04004	-0.03467
0.04341	0.02846	0.05739	0.05535	0.03115	0.01344	0.01239	0.02471	0.03227	0.02682	0.01819	0.00634	-0.00788	-0.01243	-0.00104	0.01861	0.02985	0.02484	0.01403	0.00437	-0.00696	-0.02386	-0.03903	-0.03538	-0.01931	-0.00858	-0.00558	-0.00566	-0.00961	-0.01922	-0.02635	-0.01532	0.00606	0.0108	0.00329	-0.00378	-0.01045	-0.01177	-0.01161	-0.01438	-0.01066	-0.00332	-0.00141	-0.00423	-0.01205	-0.0221	-0.02901	-0.03471	-0.04005	-0.03463
0.04359	0.02852	0.05759	0.05569	0.03149	0.01365	0.01242	0.02461	0.03224	0.02695	0.01836	0.0064	-0.00813	-0.01316	-0.00188	0.01825	0.03	0.0251	0.01427	0.00454	-0.00689	-0.02383	-0.03912	-0.03574	-0.0198	-0.00882	-0.00565	-0.00581	-0.00988	-0.01956	-0.02681	-0.01585	0.00566	0.01063	0.0032	-0.00395	-0.01071	-0.01201	-0.01175	-0.01439	-0.01058	-0.00315	-0.00117	-0.00395	-0.01178	-0.02199	-0.02909	-0.03481	-0.04004	-0.0346
0.04378	0.02859	0.05779	0.05602	0.03182	0.01385	0.01244	0.02449	0.0322	0.02706	0.01852	0.00646	-0.00839	-0.01387	-0.00272	0.0179	0.03015	0.02536	0.01451	0.0047	-0.00683	-0.02381	-0.0392	-0.0361	-0.02028	-0.00905	-0.00573	-0.00596	-0.01013	-0.0199	-0.02727	-0.01638	0.00526	0.01044	0.00311	-0.00411	-0.01096	-0.01224	-0.01187	-0.0144	-0.0105	-0.00297	-0.000924783	-0.00367	-0.01151	-0.02188	-0.02917	-0.0349	-0.04003	-0.03455
0.04396	0.02865	0.05798	0.05634	0.03214	0.01405	0.01245	0.02437	0.03214	0.02716	0.01867	0.00652	-0.00864	-0.01458	-0.00355	0.01754	0.03029	0.02561	0.01474	0.00486	-0.00676	-0.02379	-0.03928	-0.03645	-0.02076	-0.00929	-0.0058	-0.00611	-0.01039	-0.02023	-0.02773	-0.01692	0.00484	0.01024	0.00302	-0.00428	-0.0112	-0.01246	-0.01199	-0.01439	-0.01041	-0.0028	-0.00068183	-0.00339	-0.01124	-0.02176	-0.02924	-0.03499	-0.04001	-0.0345
0.04414	0.0287	0.05816	0.05665	0.03246	0.01424	0.01246	0.02424	0.03206	0.02725	0.01882	0.00657	-0.00888	-0.01529	-0.00437	0.01718	0.03043	0.02585	0.01496	0.00502	-0.0067	-0.02377	-0.03937	-0.0368	-0.02123	-0.00952	-0.00587	-0.00625	-0.01064	-0.02056	-0.02819	-0.01746	0.00443	0.01004	0.00291	-0.00445	-0.01144	-0.01267	-0.0121	-0.01437	-0.01031	-0.00262	-0.000438461	-0.00311	-0.01096	-0.02164	-0.02931	-0.03506	-0.03998	-0.03444
0.04433	0.02876	0.05833	0.05696	0.03277	0.01443	0.01246	0.02409	0.03197	0.02732	0.01895	0.00662	-0.00913	-0.01598	-0.00519	0.01682	0.03056	0.02609	0.01517	0.00517	-0.00664	-0.02375	-0.03945	-0.03715	-0.0217	-0.00975	-0.00594	-0.00639	-0.01088	-0.02089	-0.02865	-0.018	0.004	0.00983	0.0028	-0.00461	-0.01168	-0.01287	-0.01219	-0.01434	-0.0102	-0.00244	-0.000194787	-0.00282	-0.01068	-0.02151	-0.02937	-0.03513	-0.03994	-0.03438
0.04451	0.02881	0.0585	0.05726	0.03308	0.01461	0.01245	0.02394	0.03187	0.02738	0.01907	0.00666	-0.00937	-0.01667	-0.00601	0.01646	0.03069	0.02632	0.01538	0.00531	-0.00659	-0.02373	-0.03953	-0.03749	-0.02216	-0.00998	-0.00601	-0.00653	-0.01112	-0.02121	-0.02911	-0.01855	0.00357	0.00961	0.00269	-0.00478	-0.01191	-0.01306	-0.01228	-0.0143	-0.01009	-0.00226	4.90802e-05	-0.00253	-0.0104	-0.02138	-0.02943	-0.03518	-0.03989	-0.03431
0.0447	0.02885	0.05866	0.05755	0.03338	0.01479	0.01244	0.02378	0.03176	0.02743	0.01919	0.00671	-0.0096	-0.01735	-0.00682	0.01611	0.03081	0.02654	0.01558	0.00545	-0.00653	-0.02371	-0.0396	-0.03782	-0.02261	-0.0102	-0.00607	-0.00666	-0.01135	-0.02153	-0.02957	-0.0191	0.00314	0.00938	0.00257	-0.00495	-0.01213	-0.01325	-0.01235	-0.01425	-0.00997	-0.00208	0.00029303	-0.00224	-0.01011	-0.02125	-0.02947	-0.03523	-0.03983	-0.03423
0.04488	0.0289	0.05881	0.05784	0.03367	0.01496	0.01242	0.02361	0.03163	0.02746	0.0193	0.00675	-0.00984	-0.01803	-0.00762	0.01575	0.03092	0.02675	0.01577	0.00558	-0.00648	-0.02369	-0.03968	-0.03815	-0.02306	-0.01042	-0.00614	-0.00679	-0.01158	-0.02185	-0.03002	-0.01965	0.0027	0.00915	0.00244	-0.00512	-0.01235	-0.01343	-0.01241	-0.01419	-0.00985	-0.0019	0.000536951	-0.00195	-0.00981	-0.02111	-0.02952	-0.03527	-0.03976	-0.03415
0.04507	0.02893	0.05896	0.05811	0.03396	0.01512	0.0124	0.02343	0.03148	0.02748	0.01939	0.00678	-0.01007	-0.01869	-0.00841	0.01539	0.03103	0.02696	0.01595	0.00571	-0.00643	-0.02367	-0.03976	-0.03847	-0.0235	-0.01064	-0.0062	-0.00691	-0.0118	-0.02216	-0.03048	-0.0202	0.00225	0.00891	0.00231	-0.00529	-0.01257	-0.01359	-0.01246	-0.01411	-0.00972	-0.00172	0.000780739	-0.00165	-0.00951	-0.02096	-0.02955	-0.03531	-0.03968	-0.03406
0.04525	0.02897	0.0591	0.05838	0.03424	0.01528	0.01237	0.02324	0.03132	0.02748	0.01948	0.00682	-0.01029	-0.01935	-0.0092	0.01503	0.03113	0.02715	0.01613	0.00583	-0.00638	-0.02365	-0.03983	-0.03879	-0.02393	-0.01086	-0.00627	-0.00704	-0.01202	-0.02247	-0.03093	-0.02075	0.0018	0.00867	0.00217	-0.00545	-0.01277	-0.01375	-0.0125	-0.01403	-0.00958	-0.00154	0.00102	-0.00136	-0.00921	-0.02081	-0.02958	-0.03533	-0.03959	-0.03396
0.04544	0.029	0.05923	0.05864	0.03451	0.01543	0.01234	0.02304	0.03115	0.02747	0.01956	0.00685	-0.01051	-0.02	-0.00997	0.01468	0.03122	0.02734	0.01629	0.00594	-0.00633	-0.02363	-0.0399	-0.0391	-0.02435	-0.01107	-0.00633	-0.00716	-0.01223	-0.02277	-0.03138	-0.0213	0.00135	0.00841	0.00203	-0.00562	-0.01297	-0.0139	-0.01252	-0.01393	-0.00944	-0.00136	0.00127	-0.00106	-0.0089	-0.02066	-0.0296	-0.03534	-0.03949	-0.03386
0.04562	0.02903	0.05935	0.05889	0.03478	0.01557	0.0123	0.02284	0.03097	0.02745	0.01963	0.00687	-0.01073	-0.02065	-0.01074	0.01432	0.03131	0.02752	0.01645	0.00605	-0.00629	-0.02361	-0.03997	-0.03941	-0.02477	-0.01127	-0.00639	-0.00727	-0.01243	-0.02307	-0.03183	-0.02186	0.000891763	0.00816	0.00189	-0.00579	-0.01317	-0.01404	-0.01254	-0.01383	-0.00929	-0.00117	0.00151	-0.000754323	-0.00859	-0.0205	-0.02961	-0.03535	-0.03938	-0.03375
0.04581	0.02905	0.05946	0.05914	0.03504	0.01571	0.01225	0.02262	0.03077	0.02741	0.01969	0.0069	-0.01095	-0.02128	-0.0115	0.01396	0.03138	0.02769	0.0166	0.00615	-0.00625	-0.02358	-0.04004	-0.03971	-0.02518	-0.01148	-0.00644	-0.00738	-0.01263	-0.02336	-0.03228	-0.02241	0.000430346	0.00789	0.00174	-0.00595	-0.01335	-0.01416	-0.01254	-0.01371	-0.00914	-0.000988065	0.00175	-0.000450116	-0.00827	-0.02033	-0.02962	-0.03534	-0.03926	-0.03364
0.04599	0.02907	0.05957	0.05937	0.03529	0.01584	0.0122	0.0224	0.03057	0.02737	0.01975	0.00692	-0.01116	-0.0219	-0.01226	0.01361	0.03146	0.02785	0.01674	0.00625	-0.0062	-0.02356	-0.04011	-0.04	-0.02558	-0.01168	-0.0065	-0.00749	-0.01283	-0.02365	-0.03272	-0.02296	-3.42165e-05	0.00762	0.00159	-0.00611	-0.01353	-0.01428	-0.01253	-0.01358	-0.00898	-0.000803951	0.002	-0.000143801	-0.00795	-0.02015	-0.02962	-0.03533	-0.03914	-0.03352
0.04618	0.02909	0.05967	0.0596	0.03553	0.01597	0.01214	0.02217	0.03035	0.02731	0.01979	0.00693	-0.01138	-0.02252	-0.013	0.01325	0.03152	0.028	0.01686	0.00633	-0.00616	-0.02354	-0.04017	-0.04029	-0.02597	-0.01187	-0.00656	-0.0076	-0.01302	-0.02393	-0.03316	-0.02351	-0.000501558	0.00735	0.00143	-0.00627	-0.0137	-0.0144	-0.01252	-0.01345	-0.00882	-0.000619483	0.00224	0.000164576	-0.00763	-0.01997	-0.02961	-0.0353	-0.039	-0.03339
0.04636	0.02911	0.05976	0.05981	0.03576	0.01608	0.01207	0.02193	0.03011	0.02723	0.01983	0.00694	-0.01158	-0.02312	-0.01373	0.0129	0.03158	0.02814	0.01698	0.00641	-0.00613	-0.02352	-0.04023	-0.04056	-0.02635	-0.01207	-0.00661	-0.0077	-0.0132	-0.02421	-0.0336	-0.02406	-0.00097131	0.00707	0.00127	-0.00643	-0.01387	-0.0145	-0.01249	-0.0133	-0.00865	-0.000434703	0.00248	0.000474968	-0.00729	-0.01978	-0.02959	-0.03527	-0.03885	-0.03326
0.04655	0.02912	0.05984	0.06002	0.03599	0.01619	0.012	0.02169	0.02987	0.02715	0.01986	0.00695	-0.01179	-0.02372	-0.01446	0.01255	0.03163	0.02827	0.01709	0.00649	-0.00609	-0.02349	-0.04029	-0.04084	-0.02673	-0.01226	-0.00666	-0.0078	-0.01338	-0.02448	-0.03403	-0.02461	-0.00144	0.00678	0.00111	-0.00658	-0.01403	-0.01459	-0.01245	-0.01314	-0.00847	-0.000249655	0.00272	0.000787332	-0.00696	-0.01959	-0.02956	-0.03523	-0.0387	-0.03312
0.04673	0.02912	0.05992	0.06022	0.03621	0.0163	0.01192	0.02143	0.02961	0.02705	0.01988	0.00696	-0.01199	-0.0243	-0.01517	0.0122	0.03167	0.02839	0.01719	0.00655	-0.00606	-0.02347	-0.04035	-0.0411	-0.02709	-0.01244	-0.00672	-0.00789	-0.01356	-0.02475	-0.03446	-0.02516	-0.00192	0.0065	0.000945515	-0.00674	-0.01418	-0.01467	-0.0124	-0.01297	-0.00829	-6.43824e-05	0.00296	0.0011	-0.00661	-0.01939	-0.02952	-0.03518	-0.03854	-0.03298
0.04692	0.02912	0.05999	0.06041	0.03642	0.01639	0.01184	0.02117	0.02934	0.02694	0.01989	0.00696	-0.01219	-0.02488	-0.01587	0.01184	0.0317	0.0285	0.01727	0.00661	-0.00603	-0.02345	-0.04041	-0.04136	-0.02745	-0.01262	-0.00677	-0.00798	-0.01372	-0.02501	-0.03488	-0.0257	-0.00239	0.00621	0.000779452	-0.00689	-0.01432	-0.01475	-0.01233	-0.01279	-0.0081	0.000121072	0.0032	0.00142	-0.00627	-0.01918	-0.02948	-0.03512	-0.03836	-0.03283
0.0471	0.02912	0.06005	0.06059	0.03662	0.01648	0.01175	0.0209	0.02907	0.02682	0.01989	0.00696	-0.01238	-0.02545	-0.01657	0.01149	0.03172	0.02859	0.01735	0.00666	-0.006	-0.02342	-0.04046	-0.04161	-0.0278	-0.0128	-0.00682	-0.00807	-0.01388	-0.02527	-0.0353	-0.02624	-0.00287	0.00591	0.000611592	-0.00703	-0.01445	-0.01481	-0.01226	-0.0126	-0.00791	0.000306683	0.00344	0.00174	-0.00591	-0.01896	-0.02943	-0.03505	-0.03818	-0.03268
0.04728	0.02912	0.0601	0.06076	0.03681	0.01656	0.01166	0.02063	0.02878	0.02669	0.01988	0.00695	-0.01258	-0.026	-0.01725	0.01115	0.03173	0.02868	0.01741	0.00671	-0.00597	-0.0234	-0.04051	-0.04185	-0.02814	-0.01298	-0.00686	-0.00815	-0.01404	-0.02552	-0.03572	-0.02678	-0.00334	0.00561	0.000442262	-0.00717	-0.01458	-0.01486	-0.01218	-0.0124	-0.00772	0.000492488	0.00367	0.00206	-0.00556	-0.01874	-0.02936	-0.03497	-0.03799	-0.03252
0.04747	0.02911	0.06014	0.06092	0.037	0.01664	0.01156	0.02035	0.02848	0.02655	0.01987	0.00694	-0.01277	-0.02655	-0.01792	0.0108	0.03174	0.02875	0.01747	0.00675	-0.00594	-0.02337	-0.04056	-0.04209	-0.02847	-0.01315	-0.00691	-0.00824	-0.01419	-0.02577	-0.03613	-0.02731	-0.00382	0.00531	0.000271795	-0.00731	-0.0147	-0.01491	-0.01209	-0.0122	-0.00751	0.000678546	0.00391	0.00238	-0.00519	-0.0185	-0.02929	-0.03488	-0.0378	-0.03236
0.04765	0.0291	0.06018	0.06107	0.03717	0.01671	0.01145	0.02006	0.02817	0.02639	0.01985	0.00692	-0.01296	-0.02708	-0.01858	0.01045	0.03174	0.02881	0.01751	0.00677	-0.00592	-0.02334	-0.04061	-0.04231	-0.02879	-0.01332	-0.00696	-0.00831	-0.01433	-0.02601	-0.03653	-0.02784	-0.0043	0.00501	0.000100524	-0.00745	-0.01481	-0.01495	-0.01199	-0.01198	-0.0073	0.000864911	0.00414	0.0027	-0.00482	-0.01826	-0.02921	-0.03479	-0.03759	-0.03219
0.04784	0.02909	0.06021	0.06121	0.03734	0.01677	0.01134	0.01977	0.02785	0.02623	0.01982	0.0069	-0.01314	-0.02761	-0.01923	0.01011	0.03172	0.02886	0.01754	0.00679	-0.0059	-0.02331	-0.04065	-0.04253	-0.0291	-0.01348	-0.007	-0.00839	-0.01447	-0.02624	-0.03693	-0.02837	-0.00477	0.00471	-7.12192e-05	-0.00758	-0.01491	-0.01497	-0.01187	-0.01175	-0.00709	0.00105	0.00438	0.00302	-0.00445	-0.01802	-0.02912	-0.03468	-0.03738	-0.03202
0.04802	0.02907	0.06023	0.06135	0.0375	0.01682	0.01122	0.01947	0.02752	0.02606	0.01978	0.00688	-0.01332	-0.02812	-0.01986	0.00976	0.0317	0.02889	0.01756	0.00681	-0.00588	-0.02329	-0.04069	-0.04275	-0.0294	-0.01364	-0.00705	-0.00846	-0.01461	-0.02647	-0.03732	-0.02889	-0.00525	0.0044	-0.000243102	-0.0077	-0.015	-0.01499	-0.01175	-0.01152	-0.00687	0.00124	0.00461	0.00335	-0.00407	-0.01776	-0.02902	-0.03457	-0.03716	-0.03185
0.04821	0.02905	0.06025	0.06147	0.03765	0.01686	0.0111	0.01917	0.02718	0.02587	0.01973	0.00685	-0.0135	-0.02862	-0.02048	0.00942	0.03167	0.02892	0.01756	0.00681	-0.00586	-0.02326	-0.04073	-0.04295	-0.0297	-0.0138	-0.00709	-0.00852	-0.01473	-0.02669	-0.03771	-0.0294	-0.00572	0.0041	-0.000414793	-0.00782	-0.01509	-0.015	-0.01162	-0.01127	-0.00665	0.00143	0.00485	0.00368	-0.00369	-0.0175	-0.02891	-0.03444	-0.03693	-0.03167
0.04839	0.02903	0.06026	0.06158	0.03779	0.0169	0.01098	0.01886	0.02683	0.02567	0.01968	0.00682	-0.01368	-0.02911	-0.02109	0.00908	0.03163	0.02893	0.01755	0.00681	-0.00585	-0.02323	-0.04077	-0.04315	-0.02998	-0.01395	-0.00713	-0.00859	-0.01486	-0.0269	-0.03809	-0.02991	-0.00619	0.00379	-0.000585958	-0.00794	-0.01516	-0.01501	-0.01148	-0.01102	-0.00642	0.00161	0.00508	0.004	-0.0033	-0.01723	-0.0288	-0.03431	-0.0367	-0.03149
0.04858	0.029	0.06026	0.06169	0.03792	0.01693	0.01085	0.01854	0.02648	0.02547	0.01962	0.00679	-0.01385	-0.02959	-0.02169	0.00874	0.03157	0.02892	0.01753	0.0068	-0.00584	-0.0232	-0.0408	-0.04333	-0.03025	-0.0141	-0.00717	-0.00865	-0.01497	-0.02711	-0.03846	-0.03041	-0.00666	0.00348	-0.000756266	-0.00805	-0.01523	-0.015	-0.01134	-0.01075	-0.00618	0.0018	0.00531	0.00433	-0.00291	-0.01695	-0.02867	-0.03417	-0.03646	-0.0313
0.04876	0.02897	0.06025	0.06179	0.03804	0.01696	0.01071	0.01822	0.02611	0.02525	0.01955	0.00675	-0.01402	-0.03005	-0.02228	0.0084	0.03151	0.02891	0.0175	0.00678	-0.00583	-0.02317	-0.04084	-0.04352	-0.03052	-0.01425	-0.00722	-0.00871	-0.01508	-0.02731	-0.03882	-0.0309	-0.00712	0.00317	-0.000925383	-0.00815	-0.01529	-0.01499	-0.01118	-0.01048	-0.00594	0.00199	0.00554	0.00466	-0.00251	-0.01666	-0.02854	-0.03403	-0.03621	-0.03111
0.04895	0.02894	0.06024	0.06187	0.03816	0.01697	0.01057	0.0179	0.02574	0.02503	0.01947	0.0067	-0.01419	-0.03051	-0.02285	0.00806	0.03144	0.02888	0.01746	0.00675	-0.00582	-0.02314	-0.04086	-0.04369	-0.03077	-0.01439	-0.00726	-0.00876	-0.01519	-0.02751	-0.03918	-0.03139	-0.00759	0.00286	-0.00109	-0.00825	-0.01534	-0.01496	-0.01102	-0.0102	-0.0057	0.00218	0.00577	0.00499	-0.00211	-0.01636	-0.02839	-0.03387	-0.03595	-0.03092
0.04913	0.0289	0.06022	0.06195	0.03826	0.01698	0.01043	0.01757	0.02536	0.02479	0.01939	0.00666	-0.01435	-0.03095	-0.02341	0.00773	0.03135	0.02883	0.0174	0.00671	-0.00582	-0.02311	-0.04089	-0.04385	-0.03102	-0.01453	-0.0073	-0.00881	-0.01529	-0.0277	-0.03953	-0.03187	-0.00804	0.00256	-0.00126	-0.00835	-0.01538	-0.01493	-0.01084	-0.00992	-0.00545	0.00237	0.00599	0.00532	-0.0017	-0.01606	-0.02824	-0.03371	-0.03569	-0.03072
0.04932	0.02886	0.06019	0.06202	0.03836	0.01698	0.01028	0.01724	0.02497	0.02455	0.0193	0.0066	-0.01452	-0.03138	-0.02396	0.00739	0.03126	0.02877	0.01733	0.00666	-0.00582	-0.02308	-0.04091	-0.04401	-0.03126	-0.01467	-0.00734	-0.00886	-0.01538	-0.02788	-0.03987	-0.03234	-0.0085	0.00225	-0.00142	-0.00843	-0.01541	-0.01489	-0.01066	-0.00962	-0.0052	0.00257	0.00622	0.00565	-0.00129	-0.01575	-0.02807	-0.03353	-0.03542	-0.03052
0.0495	0.02882	0.06016	0.06208	0.03845	0.01698	0.01012	0.0169	0.02458	0.0243	0.0192	0.00655	-0.01467	-0.0318	-0.02449	0.00706	0.03115	0.0287	0.01724	0.00661	-0.00582	-0.02304	-0.04093	-0.04416	-0.03148	-0.01481	-0.00738	-0.00891	-0.01547	-0.02805	-0.04021	-0.03281	-0.00895	0.00195	-0.00158	-0.00852	-0.01544	-0.01485	-0.01048	-0.00932	-0.00494	0.00276	0.00645	0.00598	-0.000877184	-0.01543	-0.0279	-0.03336	-0.03515	-0.03031
0.04969	0.02878	0.06012	0.06213	0.03853	0.01697	0.00997	0.01656	0.02418	0.02404	0.01909	0.00649	-0.01483	-0.0322	-0.02501	0.00672	0.03103	0.02861	0.01715	0.00654	-0.00583	-0.02301	-0.04095	-0.0443	-0.0317	-0.01494	-0.00742	-0.00895	-0.01555	-0.02822	-0.04053	-0.03326	-0.0094	0.00164	-0.00174	-0.00859	-0.01546	-0.01479	-0.01028	-0.00901	-0.00467	0.00295	0.00667	0.00631	-0.000458596	-0.0151	-0.02772	-0.03317	-0.03487	-0.03011
0.04987	0.02873	0.06007	0.06217	0.0386	0.01695	0.00981	0.01622	0.02377	0.02377	0.01898	0.00642	-0.01498	-0.0326	-0.02552	0.00639	0.0309	0.02851	0.01704	0.00647	-0.00583	-0.02298	-0.04096	-0.04443	-0.03191	-0.01507	-0.00746	-0.00899	-0.01563	-0.02839	-0.04085	-0.03371	-0.00984	0.00134	-0.0019	-0.00866	-0.01546	-0.01473	-0.01008	-0.0087	-0.0044	0.00315	0.0069	0.00665	-3.64631e-05	-0.01477	-0.02753	-0.03298	-0.03459	-0.0299
0.05006	0.02868	0.06002	0.06221	0.03866	0.01693	0.00964	0.01588	0.02336	0.02349	0.01885	0.00635	-0.01513	-0.03298	-0.02601	0.00606	0.03076	0.0284	0.01691	0.00639	-0.00584	-0.02295	-0.04097	-0.04455	-0.03211	-0.0152	-0.0075	-0.00903	-0.0157	-0.02854	-0.04115	-0.03414	-0.01027	0.00105	-0.00205	-0.00872	-0.01546	-0.01466	-0.00987	-0.00837	-0.00413	0.00334	0.00712	0.00698	0.00038897	-0.01443	-0.02733	-0.03278	-0.0343	-0.02968
0.05024	0.02863	0.05997	0.06223	0.03872	0.0169	0.00948	0.01553	0.02294	0.02321	0.01873	0.00628	-0.01528	-0.03335	-0.02649	0.00573	0.03061	0.02826	0.01677	0.00629	-0.00586	-0.02291	-0.04098	-0.04467	-0.0323	-0.01532	-0.00755	-0.00907	-0.01576	-0.02869	-0.04145	-0.03457	-0.0107	0.000753178	-0.0022	-0.00878	-0.01545	-0.01458	-0.00965	-0.00804	-0.00385	0.00354	0.00734	0.00731	0.000817459	-0.01408	-0.02713	-0.03257	-0.034	-0.02947
0.05042	0.02858	0.0599	0.06225	0.03876	0.01686	0.00931	0.01518	0.02252	0.02292	0.01859	0.0062	-0.01542	-0.0337	-0.02696	0.0054	0.03045	0.02812	0.01662	0.00619	-0.00588	-0.02288	-0.04099	-0.04478	-0.03248	-0.01545	-0.00759	-0.0091	-0.01583	-0.02883	-0.04174	-0.03498	-0.01112	0.000462241	-0.00234	-0.00882	-0.01543	-0.0145	-0.00943	-0.00771	-0.00357	0.00374	0.00756	0.00763	0.00125	-0.01373	-0.02691	-0.03235	-0.0337	-0.02925
0.05061	0.02853	0.05983	0.06226	0.0388	0.01682	0.00913	0.01483	0.02209	0.02262	0.01845	0.00612	-0.01557	-0.03404	-0.02741	0.00507	0.03027	0.02796	0.01646	0.00608	-0.0059	-0.02285	-0.04099	-0.04488	-0.03266	-0.01557	-0.00763	-0.00913	-0.01588	-0.02896	-0.04202	-0.03539	-0.01154	0.00017509	-0.00248	-0.00887	-0.0154	-0.01441	-0.0092	-0.00736	-0.00328	0.00394	0.00778	0.00796	0.00168	-0.01337	-0.02669	-0.03213	-0.0334	-0.02903
0.05079	0.02847	0.05976	0.06226	0.03883	0.01677	0.00896	0.01448	0.02166	0.02231	0.0183	0.00603	-0.0157	-0.03437	-0.02784	0.00474	0.03009	0.02778	0.01628	0.00596	-0.00592	-0.02281	-0.04099	-0.04497	-0.03282	-0.01568	-0.00767	-0.00916	-0.01593	-0.02909	-0.04229	-0.03578	-0.01195	-0.000107898	-0.00262	-0.0089	-0.01537	-0.01431	-0.00897	-0.00702	-0.00299	0.00414	0.008	0.00829	0.00212	-0.013	-0.02646	-0.03191	-0.03309	-0.02881
0.05098	0.02841	0.05968	0.06225	0.03885	0.01671	0.00878	0.01413	0.02122	0.022	0.01814	0.00594	-0.01584	-0.03469	-0.02827	0.00442	0.02989	0.02759	0.01608	0.00584	-0.00595	-0.02278	-0.04099	-0.04506	-0.03298	-0.0158	-0.00772	-0.00919	-0.01598	-0.02921	-0.04254	-0.03616	-0.01235	-0.000386343	-0.00275	-0.00893	-0.01532	-0.0142	-0.00873	-0.00666	-0.00269	0.00435	0.00822	0.00862	0.00256	-0.01262	-0.02622	-0.03168	-0.03278	-0.02859
0.05116	0.02835	0.05959	0.06224	0.03887	0.01665	0.0086	0.01377	0.02078	0.02168	0.01798	0.00585	-0.01597	-0.03499	-0.02868	0.00409	0.02967	0.02738	0.01588	0.0057	-0.00598	-0.02275	-0.04098	-0.04513	-0.03313	-0.01592	-0.00776	-0.00922	-0.01602	-0.02932	-0.04279	-0.03653	-0.01274	-0.000659876	-0.00287	-0.00894	-0.01527	-0.01409	-0.00848	-0.0063	-0.00239	0.00455	0.00844	0.00894	0.003	-0.01224	-0.02598	-0.03144	-0.03246	-0.02836
0.05135	0.02829	0.0595	0.06222	0.03887	0.01659	0.00842	0.01342	0.02034	0.02135	0.01781	0.00575	-0.0161	-0.03528	-0.02907	0.00377	0.02945	0.02716	0.01566	0.00555	-0.00602	-0.02272	-0.04098	-0.0452	-0.03327	-0.01603	-0.00781	-0.00924	-0.01606	-0.02943	-0.04303	-0.03689	-0.01313	-0.000928156	-0.00299	-0.00896	-0.0152	-0.01397	-0.00823	-0.00594	-0.00208	0.00476	0.00866	0.00926	0.00344	-0.01186	-0.02572	-0.0312	-0.03215	-0.02813
0.05153	0.02822	0.05941	0.06219	0.03887	0.01652	0.00823	0.01306	0.01989	0.02102	0.01763	0.00564	-0.01622	-0.03555	-0.02945	0.00344	0.02921	0.02692	0.01542	0.00539	-0.00605	-0.02268	-0.04096	-0.04526	-0.0334	-0.01614	-0.00786	-0.00927	-0.01609	-0.02952	-0.04325	-0.03723	-0.0135	-0.00119	-0.00311	-0.00896	-0.01513	-0.01385	-0.00798	-0.00557	-0.00177	0.00497	0.00887	0.00958	0.00388	-0.01147	-0.02547	-0.03095	-0.03182	-0.0279
0.05172	0.02815	0.05931	0.06215	0.03887	0.01644	0.00805	0.0127	0.01944	0.02068	0.01745	0.00554	-0.01634	-0.03581	-0.02982	0.00312	0.02896	0.02666	0.01518	0.00523	-0.0061	-0.02265	-0.04095	-0.04532	-0.03352	-0.01625	-0.00791	-0.00929	-0.01612	-0.02961	-0.04347	-0.03757	-0.01387	-0.00145	-0.00322	-0.00896	-0.01505	-0.01372	-0.00772	-0.0052	-0.00146	0.00518	0.00909	0.0099	0.00433	-0.01107	-0.0252	-0.0307	-0.0315	-0.02767
0.0519	0.02809	0.05921	0.0621	0.03885	0.01636	0.00786	0.01235	0.01899	0.02033	0.01726	0.00543	-0.01646	-0.03606	-0.03017	0.0028	0.0287	0.02639	0.01491	0.00505	-0.00614	-0.02262	-0.04093	-0.04536	-0.03364	-0.01636	-0.00796	-0.00931	-0.01614	-0.0297	-0.04367	-0.03789	-0.01423	-0.0017	-0.00332	-0.00894	-0.01496	-0.01358	-0.00746	-0.00482	-0.00114	0.0054	0.0093	0.01022	0.00477	-0.01067	-0.02493	-0.03045	-0.03117	-0.02744
0.05209	0.02802	0.0591	0.06205	0.03883	0.01628	0.00767	0.01199	0.01853	0.01998	0.01706	0.00531	-0.01657	-0.0363	-0.03051	0.00248	0.02843	0.02611	0.01464	0.00487	-0.0062	-0.02259	-0.04091	-0.0454	-0.03375	-0.01647	-0.00801	-0.00933	-0.01616	-0.02977	-0.04386	-0.03819	-0.01457	-0.00194	-0.00342	-0.00892	-0.01486	-0.01344	-0.00719	-0.00444	-0.000819434	0.00562	0.00951	0.01053	0.00521	-0.01026	-0.02465	-0.03019	-0.03084	-0.0272
0.05227	0.02795	0.05898	0.06199	0.0388	0.01619	0.00748	0.01164	0.01808	0.01963	0.01686	0.00519	-0.01669	-0.03652	-0.03083	0.00216	0.02814	0.02581	0.01435	0.00467	-0.00625	-0.02256	-0.04089	-0.04543	-0.03385	-0.01658	-0.00807	-0.00935	-0.01617	-0.02984	-0.04404	-0.03848	-0.01491	-0.00218	-0.00351	-0.00889	-0.01476	-0.01329	-0.00692	-0.00405	-0.000493658	0.00584	0.00973	0.01084	0.00566	-0.00985	-0.02437	-0.02992	-0.03051	-0.02697
0.05246	0.02787	0.05887	0.06193	0.03876	0.0161	0.0073	0.01128	0.01762	0.01927	0.01665	0.00507	-0.01679	-0.03673	-0.03114	0.00184	0.02784	0.02549	0.01405	0.00447	-0.00631	-0.02253	-0.04087	-0.04546	-0.03394	-0.01668	-0.00812	-0.00937	-0.01619	-0.02991	-0.04421	-0.03876	-0.01524	-0.00241	-0.00359	-0.00886	-0.01464	-0.01313	-0.00664	-0.00366	-0.000164225	0.00606	0.00994	0.01115	0.0061	-0.00944	-0.02408	-0.02966	-0.03017	-0.02673
0.05264	0.0278	0.05875	0.06186	0.03872	0.016	0.00711	0.01093	0.01716	0.0189	0.01644	0.00494	-0.0169	-0.03692	-0.03144	0.00152	0.02753	0.02516	0.01374	0.00425	-0.00637	-0.0225	-0.04084	-0.04548	-0.03403	-0.01679	-0.00818	-0.00939	-0.01619	-0.02996	-0.04436	-0.03902	-0.01555	-0.00263	-0.00367	-0.00881	-0.01452	-0.01297	-0.00636	-0.00327	0.000168748	0.00628	0.01015	0.01145	0.00654	-0.00902	-0.02379	-0.02939	-0.02984	-0.02649
0.05283	0.02772	0.05862	0.06178	0.03867	0.0159	0.00692	0.01058	0.0167	0.01854	0.01622	0.00481	-0.017	-0.0371	-0.03172	0.0012	0.02721	0.02481	0.01341	0.00403	-0.00644	-0.02248	-0.04081	-0.04549	-0.03411	-0.0169	-0.00824	-0.0094	-0.0162	-0.03001	-0.04451	-0.03927	-0.01586	-0.00285	-0.00374	-0.00876	-0.01439	-0.0128	-0.00608	-0.00287	0.000505145	0.00651	0.01036	0.01175	0.00698	-0.0086	-0.02349	-0.02912	-0.0295	-0.02625
0.05301	0.02765	0.05849	0.06169	0.03862	0.0158	0.00673	0.01023	0.01624	0.01816	0.01599	0.00468	-0.01709	-0.03727	-0.03199	0.000885477	0.02687	0.02445	0.01307	0.0038	-0.00652	-0.02245	-0.04078	-0.04549	-0.03418	-0.017	-0.0083	-0.00942	-0.0162	-0.03005	-0.04464	-0.03951	-0.01615	-0.00305	-0.0038	-0.0087	-0.01425	-0.01263	-0.00579	-0.00247	0.000844851	0.00674	0.01056	0.01205	0.00742	-0.00818	-0.02319	-0.02884	-0.02916	-0.02601
0.0532	0.02757	0.05836	0.0616	0.03856	0.0157	0.00654	0.00989	0.01578	0.01779	0.01576	0.00454	-0.01719	-0.03743	-0.03224	0.000569281	0.02652	0.02407	0.01271	0.00356	-0.00659	-0.02243	-0.04074	-0.04548	-0.03425	-0.01711	-0.00837	-0.00944	-0.01619	-0.03009	-0.04476	-0.03973	-0.01644	-0.00325	-0.00385	-0.00863	-0.0141	-0.01245	-0.00551	-0.00207	0.00119	0.00697	0.01077	0.01234	0.00786	-0.00776	-0.02288	-0.02857	-0.02882	-0.02577
0.05338	0.02749	0.05822	0.06151	0.0385	0.01559	0.00635	0.00954	0.01532	0.01741	0.01552	0.0044	-0.01728	-0.03757	-0.03248	0.000253848	0.02616	0.02368	0.01235	0.00331	-0.00668	-0.0224	-0.0407	-0.04547	-0.0343	-0.01721	-0.00844	-0.00946	-0.01619	-0.03011	-0.04487	-0.03993	-0.0167	-0.00344	-0.0039	-0.00855	-0.01394	-0.01227	-0.00521	-0.00167	0.00153	0.0072	0.01098	0.01263	0.00829	-0.00733	-0.02258	-0.02829	-0.02848	-0.02553
0.05356	0.02741	0.05809	0.0614	0.03842	0.01548	0.00617	0.0092	0.01486	0.01702	0.01528	0.00425	-0.01736	-0.03769	-0.0327	-6.08295e-05	0.02579	0.02327	0.01197	0.00305	-0.00676	-0.02238	-0.04066	-0.04546	-0.03436	-0.01732	-0.00851	-0.00947	-0.01618	-0.03014	-0.04496	-0.04012	-0.01696	-0.00362	-0.00393	-0.00847	-0.01378	-0.01208	-0.00492	-0.00127	0.00188	0.00744	0.01118	0.01291	0.00873	-0.0069	-0.02226	-0.02801	-0.02814	-0.02529
0.05375	0.02733	0.05794	0.06129	0.03835	0.01537	0.00599	0.00886	0.0144	0.01663	0.01503	0.00411	-0.01744	-0.03781	-0.03292	-0.000374758	0.0254	0.02285	0.01158	0.00278	-0.00685	-0.02236	-0.04062	-0.04543	-0.0344	-0.01742	-0.00858	-0.00949	-0.01617	-0.03015	-0.04504	-0.04029	-0.01721	-0.00379	-0.00396	-0.00837	-0.0136	-0.01189	-0.00463	-0.000861318	0.00223	0.00768	0.01139	0.01319	0.00915	-0.00647	-0.02195	-0.02772	-0.0278	-0.02505
0.05393	0.02725	0.0578	0.06118	0.03827	0.01525	0.0058	0.00853	0.01394	0.01624	0.01477	0.00395	-0.01752	-0.03791	-0.03311	-0.000687944	0.025	0.02241	0.01117	0.00251	-0.00695	-0.02234	-0.04057	-0.0454	-0.03445	-0.01753	-0.00865	-0.00951	-0.01615	-0.03016	-0.04511	-0.04045	-0.01744	-0.00395	-0.00399	-0.00827	-0.01342	-0.01169	-0.00433	-0.000454415	0.00259	0.00792	0.01159	0.01347	0.00958	-0.00604	-0.02163	-0.02744	-0.02746	-0.0248
0.05412	0.02717	0.05765	0.06106	0.03818	0.01514	0.00562	0.0082	0.01349	0.01585	0.01451	0.0038	-0.0176	-0.03799	-0.0333	-0.001	0.02459	0.02196	0.01076	0.00222	-0.00705	-0.02232	-0.04053	-0.04536	-0.03448	-0.01763	-0.00873	-0.00953	-0.01613	-0.03016	-0.04517	-0.04059	-0.01766	-0.0041	-0.004	-0.00816	-0.01323	-0.01148	-0.00403	-4.66223e-05	0.00294	0.00817	0.01179	0.01374	0.01	-0.00562	-0.02131	-0.02716	-0.02712	-0.02456
0.0543	0.02709	0.0575	0.06094	0.03809	0.01502	0.00545	0.00787	0.01303	0.01546	0.01425	0.00364	-0.01767	-0.03807	-0.03347	-0.00131	0.02417	0.02149	0.01033	0.00193	-0.00716	-0.02231	-0.04048	-0.04532	-0.03451	-0.01774	-0.00881	-0.00955	-0.01611	-0.03015	-0.04521	-0.04071	-0.01787	-0.00424	-0.004	-0.00804	-0.01304	-0.01127	-0.00373	0.000361765	0.0033	0.00842	0.01199	0.014	0.01042	-0.00519	-0.02099	-0.02688	-0.02678	-0.02432
0.05449	0.027	0.05734	0.06081	0.038	0.0149	0.00527	0.00755	0.01258	0.01506	0.01398	0.00348	-0.01773	-0.03813	-0.03362	-0.00162	0.02374	0.02101	0.00989	0.00163	-0.00727	-0.02229	-0.04042	-0.04527	-0.03453	-0.01784	-0.0089	-0.00957	-0.01609	-0.03014	-0.04524	-0.04082	-0.01806	-0.00437	-0.004	-0.00791	-0.01283	-0.01106	-0.00342	0.000770452	0.00366	0.00867	0.01219	0.01426	0.01083	-0.00476	-0.02067	-0.02659	-0.02644	-0.02408
0.05467	0.02692	0.05719	0.06067	0.0379	0.01479	0.0051	0.00723	0.01213	0.01466	0.01371	0.00331	-0.01779	-0.03818	-0.03377	-0.00193	0.02329	0.02052	0.00944	0.00132	-0.00738	-0.02228	-0.04037	-0.04521	-0.03455	-0.01795	-0.00898	-0.00959	-0.01607	-0.03012	-0.04526	-0.04091	-0.01824	-0.00449	-0.00398	-0.00777	-0.01262	-0.01084	-0.00312	0.00118	0.00402	0.00892	0.01239	0.01452	0.01124	-0.00433	-0.02035	-0.02631	-0.0261	-0.02383
0.05486	0.02683	0.05703	0.06054	0.0378	0.01467	0.00493	0.00692	0.01169	0.01426	0.01343	0.00314	-0.01785	-0.03821	-0.0339	-0.00224	0.02283	0.02001	0.00898	0.001	-0.0075	-0.02227	-0.04031	-0.04515	-0.03457	-0.01806	-0.00907	-0.00961	-0.01604	-0.0301	-0.04527	-0.04099	-0.0184	-0.0046	-0.00396	-0.00763	-0.0124	-0.01061	-0.00282	0.00159	0.00439	0.00918	0.01259	0.01477	0.01164	-0.00391	-0.02003	-0.02603	-0.02576	-0.02359
0.05504	0.02675	0.05687	0.06039	0.03769	0.01455	0.00477	0.00661	0.01124	0.01386	0.01315	0.00297	-0.01791	-0.03823	-0.03402	-0.00255	0.02237	0.01949	0.00851	0.000679395	-0.00763	-0.02226	-0.04025	-0.04508	-0.03457	-0.01817	-0.00917	-0.00964	-0.01601	-0.03006	-0.04526	-0.04105	-0.01855	-0.0047	-0.00393	-0.00747	-0.01217	-0.01039	-0.00251	0.002	0.00475	0.00943	0.01278	0.01501	0.01204	-0.00349	-0.01971	-0.02574	-0.02542	-0.02335
0.05523	0.02666	0.0567	0.06024	0.03758	0.01444	0.00461	0.00631	0.0108	0.01345	0.01286	0.0028	-0.01796	-0.03824	-0.03412	-0.00286	0.02189	0.01895	0.00803	0.000346753	-0.00776	-0.02225	-0.04019	-0.04501	-0.03458	-0.01827	-0.00926	-0.00966	-0.01598	-0.03003	-0.04524	-0.04109	-0.01869	-0.00479	-0.00389	-0.00731	-0.01193	-0.01015	-0.0022	0.0024	0.00512	0.00969	0.01298	0.01525	0.01243	-0.00307	-0.01938	-0.02546	-0.02509	-0.0231
0.05541	0.02657	0.05654	0.06009	0.03747	0.01432	0.00446	0.00601	0.01037	0.01305	0.01257	0.00262	-0.01801	-0.03824	-0.03421	-0.00317	0.02139	0.0184	0.00753	6.66253e-06	-0.00789	-0.02225	-0.04012	-0.04493	-0.03458	-0.01838	-0.00936	-0.00969	-0.01595	-0.02998	-0.0452	-0.04111	-0.01881	-0.00487	-0.00384	-0.00714	-0.01169	-0.00991	-0.0019	0.00281	0.00548	0.00996	0.01317	0.01548	0.01281	-0.00265	-0.01906	-0.02518	-0.02475	-0.02286
0.0556	0.02649	0.05637	0.05994	0.03735	0.01421	0.00431	0.00572	0.00994	0.01265	0.01227	0.00244	-0.01805	-0.03822	-0.03429	-0.00347	0.02089	0.01784	0.00703	-0.000340601	-0.00803	-0.02224	-0.04006	-0.04484	-0.03457	-0.01849	-0.00947	-0.00971	-0.01592	-0.02993	-0.04516	-0.04112	-0.01892	-0.00493	-0.00378	-0.00696	-0.01143	-0.00967	-0.00159	0.00321	0.00585	0.01022	0.01336	0.0157	0.01318	-0.00224	-0.01874	-0.0249	-0.02442	-0.02262
0.05578	0.0264	0.0562	0.05977	0.03723	0.01409	0.00416	0.00544	0.00951	0.01224	0.01197	0.00226	-0.01809	-0.03819	-0.03436	-0.00378	0.02038	0.01727	0.00652	-0.000694763	-0.00818	-0.02224	-0.03999	-0.04475	-0.03456	-0.01861	-0.00957	-0.00974	-0.01588	-0.02988	-0.0451	-0.04112	-0.01902	-0.00499	-0.00371	-0.00677	-0.01117	-0.00942	-0.00128	0.00361	0.00622	0.01049	0.01355	0.01592	0.01355	-0.00183	-0.01842	-0.02463	-0.02409	-0.02237
0.05597	0.02631	0.05602	0.05961	0.03711	0.01398	0.00402	0.00516	0.00909	0.01184	0.01167	0.00207	-0.01812	-0.03815	-0.03441	-0.00409	0.01985	0.01668	0.006	-0.00106	-0.00832	-0.02224	-0.03992	-0.04465	-0.03455	-0.01872	-0.00968	-0.00977	-0.01584	-0.02982	-0.04503	-0.04109	-0.0191	-0.00503	-0.00363	-0.00658	-0.01091	-0.00917	-0.000972687	0.00402	0.00658	0.01076	0.01374	0.01613	0.01391	-0.00143	-0.01811	-0.02435	-0.02376	-0.02213
0.05615	0.02622	0.05585	0.05944	0.03699	0.01387	0.00388	0.00489	0.00867	0.01143	0.01136	0.00189	-0.01815	-0.0381	-0.03445	-0.00439	0.01932	0.01609	0.00547	-0.00142	-0.00848	-0.02225	-0.03985	-0.04455	-0.03453	-0.01883	-0.0098	-0.00981	-0.01581	-0.02975	-0.04494	-0.04105	-0.01916	-0.00506	-0.00355	-0.00637	-0.01063	-0.00892	-0.000664985	0.00441	0.00695	0.01103	0.01393	0.01634	0.01427	-0.00103	-0.01779	-0.02408	-0.02343	-0.02189
0.05634	0.02613	0.05567	0.05927	0.03686	0.01377	0.00376	0.00462	0.00825	0.01103	0.01105	0.0017	-0.01818	-0.03803	-0.03448	-0.00469	0.01878	0.01548	0.00494	-0.0018	-0.00864	-0.02225	-0.03977	-0.04444	-0.0345	-0.01895	-0.00991	-0.00984	-0.01577	-0.02967	-0.04484	-0.04099	-0.01921	-0.00508	-0.00345	-0.00616	-0.01035	-0.00866	-0.00035752	0.00481	0.00732	0.0113	0.01411	0.01654	0.01461	-0.000634911	-0.01748	-0.02381	-0.02311	-0.02165
0.05652	0.02604	0.05549	0.05909	0.03673	0.01366	0.00363	0.00436	0.00785	0.01062	0.01073	0.00151	-0.0182	-0.03795	-0.0345	-0.005	0.01822	0.01486	0.00439	-0.00217	-0.0088	-0.02226	-0.03969	-0.04433	-0.03448	-0.01906	-0.01003	-0.00988	-0.01573	-0.0296	-0.04473	-0.04092	-0.01925	-0.00509	-0.00334	-0.00594	-0.01007	-0.00839	-5.04456e-05	0.0052	0.00768	0.01157	0.01429	0.01673	0.01495	-0.000248104	-0.01717	-0.02355	-0.02278	-0.02141
0.0567	0.02595	0.05531	0.05891	0.0366	0.01356	0.00351	0.00411	0.00744	0.01022	0.01041	0.00131	-0.01822	-0.03786	-0.03451	-0.0053	0.01766	0.01423	0.00384	-0.00256	-0.00896	-0.02227	-0.03962	-0.04421	-0.03445	-0.01918	-0.01016	-0.00992	-0.01568	-0.02951	-0.04461	-0.04083	-0.01927	-0.00508	-0.00323	-0.00571	-0.00977	-0.00812	0.000256083	0.00559	0.00805	0.01185	0.01447	0.01691	0.01528	0.000132164	-0.01687	-0.02328	-0.02246	-0.02117
0.05689	0.02586	0.05513	0.05873	0.03647	0.01346	0.0034	0.00387	0.00705	0.00982	0.01009	0.00111	-0.01823	-0.03776	-0.03451	-0.0056	0.01709	0.01359	0.00328	-0.00295	-0.00914	-0.02228	-0.03953	-0.04409	-0.03441	-0.0193	-0.01028	-0.00996	-0.01564	-0.02942	-0.04448	-0.04072	-0.01927	-0.00506	-0.0031	-0.00548	-0.00947	-0.00785	0.000561912	0.00598	0.00841	0.01212	0.01465	0.01709	0.01559	0.000505422	-0.01657	-0.02302	-0.02215	-0.02093
0.05707	0.02577	0.05494	0.05854	0.03633	0.01336	0.0033	0.00363	0.00666	0.00942	0.00977	0.000916385	-0.01824	-0.03765	-0.03449	-0.0059	0.01651	0.01294	0.00272	-0.00334	-0.00931	-0.0223	-0.03945	-0.04396	-0.03437	-0.01942	-0.01041	-0.01	-0.0156	-0.02933	-0.04433	-0.0406	-0.01926	-0.00504	-0.00297	-0.00524	-0.00916	-0.00757	0.000866887	0.00636	0.00877	0.0124	0.01483	0.01726	0.0159	0.000871196	-0.01627	-0.02276	-0.02183	-0.02069
0.05726	0.02568	0.05475	0.05835	0.0362	0.01327	0.0032	0.0034	0.00627	0.00902	0.00944	0.000716074	-0.01825	-0.03753	-0.03447	-0.0062	0.01591	0.01228	0.00214	-0.00374	-0.00949	-0.02231	-0.03937	-0.04382	-0.03433	-0.01954	-0.01055	-0.01005	-0.01556	-0.02923	-0.04417	-0.04046	-0.01924	-0.005	-0.00282	-0.00499	-0.00885	-0.00729	0.00117	0.00674	0.00913	0.01268	0.015	0.01742	0.0162	0.00123	-0.01598	-0.02251	-0.02152	-0.02045
0.05744	0.02558	0.05457	0.05816	0.03606	0.01318	0.00311	0.00318	0.0059	0.00862	0.00911	0.000513977	-0.01825	-0.0374	-0.03443	-0.0065	0.01532	0.01161	0.00157	-0.00415	-0.00967	-0.02233	-0.03928	-0.04369	-0.03429	-0.01966	-0.01069	-0.01009	-0.01551	-0.02912	-0.044	-0.0403	-0.0192	-0.00494	-0.00267	-0.00473	-0.00853	-0.00701	0.00147	0.00712	0.00949	0.01296	0.01517	0.01757	0.01649	0.00158	-0.01569	-0.02226	-0.02121	-0.02021
0.05763	0.02549	0.05437	0.05797	0.03593	0.0131	0.00303	0.00297	0.00553	0.00823	0.00878	0.000310217	-0.01825	-0.03725	-0.03439	-0.0068	0.01471	0.01093	0.000982766	-0.00455	-0.00986	-0.02235	-0.03919	-0.04354	-0.03424	-0.01978	-0.01083	-0.01014	-0.01547	-0.02901	-0.04382	-0.04013	-0.01914	-0.00488	-0.00251	-0.00446	-0.0082	-0.00672	0.00178	0.00749	0.00985	0.01323	0.01534	0.01772	0.01677	0.00192	-0.01541	-0.02202	-0.02091	-0.01997
0.05781	0.0254	0.05418	0.05777	0.03579	0.01302	0.00295	0.00276	0.00516	0.00784	0.00845	0.00010492	-0.01825	-0.0371	-0.03433	-0.00709	0.01409	0.01025	0.000395152	-0.00497	-0.01005	-0.02238	-0.0391	-0.0434	-0.03419	-0.0199	-0.01097	-0.01019	-0.01542	-0.0289	-0.04362	-0.03994	-0.01907	-0.0048	-0.00234	-0.00419	-0.00787	-0.00643	0.00208	0.00785	0.0102	0.01351	0.01551	0.01786	0.01703	0.00225	-0.01514	-0.02177	-0.02061	-0.01974
0.058	0.0253	0.05399	0.05756	0.03565	0.01294	0.00288	0.00257	0.0048	0.00745	0.00811	-0.000101791	-0.01824	-0.03693	-0.03426	-0.00739	0.01347	0.00956	-0.000196663	-0.00538	-0.01024	-0.0224	-0.03901	-0.04324	-0.03413	-0.02003	-0.01112	-0.01025	-0.01538	-0.02877	-0.04342	-0.03973	-0.01899	-0.00471	-0.00216	-0.00391	-0.00753	-0.00613	0.00237	0.00821	0.01056	0.01379	0.01567	0.01799	0.01729	0.00257	-0.01487	-0.02154	-0.02031	-0.0195
0.05818	0.02521	0.05379	0.05736	0.03551	0.01287	0.00282	0.00238	0.00445	0.00706	0.00777	-0.000309791	-0.01822	-0.03676	-0.03419	-0.00769	0.01284	0.00886	-0.000792165	-0.0058	-0.01044	-0.02243	-0.03892	-0.04309	-0.03407	-0.02015	-0.01127	-0.0103	-0.01533	-0.02865	-0.0432	-0.03951	-0.01889	-0.00461	-0.00197	-0.00363	-0.00719	-0.00584	0.00267	0.00857	0.0109	0.01407	0.01583	0.01811	0.01753	0.00289	-0.0146	-0.0213	-0.02001	-0.01927
0.05837	0.02511	0.05359	0.05715	0.03536	0.0128	0.00277	0.0022	0.00411	0.00668	0.00743	-0.000518957	-0.0182	-0.03657	-0.0341	-0.00798	0.0122	0.00815	-0.00139	-0.00622	-0.01064	-0.02246	-0.03882	-0.04293	-0.03401	-0.02028	-0.01142	-0.01036	-0.01529	-0.02852	-0.04297	-0.03928	-0.01878	-0.0045	-0.00177	-0.00334	-0.00684	-0.00553	0.00297	0.00892	0.01125	0.01435	0.01598	0.01823	0.01776	0.00319	-0.01434	-0.02108	-0.01972	-0.01903
0.05855	0.02502	0.05339	0.05694	0.03522	0.01273	0.00272	0.00202	0.00378	0.0063	0.00709	-0.000729163	-0.01818	-0.03638	-0.03401	-0.00827	0.01156	0.00744	-0.00199	-0.00664	-0.01084	-0.02249	-0.03873	-0.04276	-0.03395	-0.02041	-0.01158	-0.01042	-0.01524	-0.02839	-0.04273	-0.03903	-0.01865	-0.00437	-0.00156	-0.00304	-0.00648	-0.00523	0.00326	0.00926	0.01159	0.01462	0.01614	0.01833	0.01798	0.00348	-0.01409	-0.02085	-0.01944	-0.0188
0.05874	0.02492	0.05319	0.05672	0.03508	0.01267	0.00268	0.00186	0.00345	0.00592	0.00675	-0.000940287	-0.01816	-0.03617	-0.0339	-0.00856	0.01091	0.00672	-0.0026	-0.00706	-0.01104	-0.02253	-0.03863	-0.04259	-0.03388	-0.02053	-0.01174	-0.01049	-0.01519	-0.02825	-0.04248	-0.03876	-0.01851	-0.00424	-0.00135	-0.00274	-0.00612	-0.00492	0.00355	0.0096	0.01193	0.0149	0.01628	0.01843	0.01819	0.00376	-0.01385	-0.02064	-0.01915	-0.01857
0.05892	0.02482	0.05298	0.0565	0.03493	0.01262	0.00265	0.0017	0.00313	0.00554	0.00641	-0.00115	-0.01813	-0.03596	-0.03379	-0.00885	0.01026	0.006	-0.0032	-0.00748	-0.01125	-0.02256	-0.03853	-0.04242	-0.03381	-0.02066	-0.0119	-0.01055	-0.01515	-0.02811	-0.04222	-0.03848	-0.01835	-0.00409	-0.00112	-0.00243	-0.00576	-0.00461	0.00384	0.00993	0.01226	0.01517	0.01643	0.01852	0.01839	0.00403	-0.01361	-0.02042	-0.01887	-0.01833
0.05911	0.02473	0.05278	0.05628	0.03479	0.01257	0.00263	0.00155	0.00281	0.00517	0.00606	-0.00136	-0.01809	-0.03573	-0.03367	-0.00914	0.0096	0.00527	-0.00381	-0.00791	-0.01146	-0.0226	-0.03842	-0.04224	-0.03374	-0.02079	-0.01207	-0.01062	-0.0151	-0.02796	-0.04195	-0.03818	-0.01817	-0.00393	-0.000888824	-0.00211	-0.00539	-0.0043	0.00412	0.01026	0.01259	0.01544	0.01657	0.0186	0.01857	0.00429	-0.01339	-0.02022	-0.0186	-0.0181
0.05929	0.02463	0.05257	0.05606	0.03464	0.01252	0.00261	0.00141	0.00251	0.0048	0.00572	-0.00158	-0.01806	-0.0355	-0.03354	-0.00943	0.00893	0.00454	-0.00441	-0.00833	-0.01167	-0.02264	-0.03832	-0.04206	-0.03366	-0.02092	-0.01224	-0.01069	-0.01506	-0.02781	-0.04167	-0.03787	-0.01799	-0.00376	-0.000648222	-0.00179	-0.00502	-0.00398	0.00441	0.01057	0.01291	0.01571	0.01671	0.01867	0.01874	0.00453	-0.01317	-0.02002	-0.01833	-0.01787
0.05948	0.02453	0.05236	0.05583	0.0345	0.01248	0.0026	0.00128	0.00221	0.00444	0.00537	-0.00179	-0.01801	-0.03526	-0.03341	-0.00972	0.00826	0.0038	-0.00502	-0.00875	-0.01188	-0.02268	-0.03822	-0.04187	-0.03359	-0.02105	-0.01241	-0.01077	-0.01501	-0.02765	-0.04137	-0.03755	-0.01779	-0.00358	-0.000399652	-0.00146	-0.00464	-0.00366	0.00469	0.01089	0.01323	0.01598	0.01684	0.01873	0.0189	0.00476	-0.01295	-0.01982	-0.01806	-0.01765
0.05966	0.02443	0.05215	0.0556	0.03435	0.01244	0.0026	0.00116	0.00192	0.00408	0.00502	-0.00201	-0.01797	-0.03502	-0.03326	-0.01	0.00759	0.00306	-0.00563	-0.00918	-0.01209	-0.02273	-0.03811	-0.04168	-0.03351	-0.02118	-0.01258	-0.01085	-0.01497	-0.0275	-0.04107	-0.03721	-0.01757	-0.00338	-0.000143338	-0.00113	-0.00426	-0.00334	0.00496	0.01119	0.01354	0.01624	0.01697	0.01878	0.01904	0.00498	-0.01275	-0.01963	-0.0178	-0.01742
0.05984	0.02433	0.05193	0.05537	0.0342	0.01241	0.00261	0.00104	0.00164	0.00373	0.00468	-0.00222	-0.01792	-0.03476	-0.03311	-0.01029	0.00691	0.00232	-0.00623	-0.0096	-0.01231	-0.02277	-0.038	-0.04149	-0.03342	-0.02132	-0.01276	-0.01092	-0.01492	-0.02733	-0.04076	-0.03686	-0.01734	-0.00318	0.00012049	-0.000798814	-0.00388	-0.00302	0.00524	0.01149	0.01385	0.0165	0.01709	0.01883	0.01917	0.00519	-0.01256	-0.01945	-0.01754	-0.01719
0.06003	0.02423	0.05171	0.05513	0.03406	0.01238	0.00262	0.000932303	0.00136	0.00338	0.00433	-0.00243	-0.01787	-0.0345	-0.03295	-0.01057	0.00623	0.00158	-0.00684	-0.01002	-0.01252	-0.02282	-0.03789	-0.04129	-0.03334	-0.02145	-0.01294	-0.011	-0.01488	-0.02717	-0.04044	-0.03649	-0.0171	-0.00296	0.000391606	-0.000459173	-0.00349	-0.0027	0.00551	0.01178	0.01415	0.01676	0.01721	0.01887	0.01929	0.00538	-0.01237	-0.01927	-0.01729	-0.01697
0.06021	0.02413	0.05149	0.05489	0.03391	0.01236	0.00264	0.000831127	0.00109	0.00303	0.00398	-0.00265	-0.01781	-0.03422	-0.03279	-0.01085	0.00555	0.000835625	-0.00744	-0.01044	-0.01273	-0.02286	-0.03778	-0.04109	-0.03325	-0.02158	-0.01312	-0.01109	-0.01484	-0.027	-0.04011	-0.03611	-0.01685	-0.00273	0.000669784	-0.000115443	-0.0031	-0.00237	0.00577	0.01206	0.01444	0.01701	0.01732	0.01889	0.01939	0.00556	-0.01219	-0.0191	-0.01704	-0.01675
0.0604	0.02402	0.05127	0.05464	0.03376	0.01234	0.00267	0.000737396	0.000833714	0.00269	0.00364	-0.00286	-0.01775	-0.03395	-0.03262	-0.01113	0.00486	9.1293e-05	-0.00804	-0.01085	-0.01295	-0.02291	-0.03766	-0.04088	-0.03316	-0.02171	-0.01331	-0.01117	-0.01479	-0.02682	-0.03976	-0.03572	-0.01658	-0.00249	0.000954795	0.000232105	-0.0027	-0.00204	0.00604	0.01233	0.01473	0.01726	0.01743	0.01891	0.01948	0.00573	-0.01203	-0.01893	-0.0168	-0.01652
0.06058	0.02392	0.05105	0.0544	0.03361	0.01232	0.0027	0.000650981	0.000581431	0.00235	0.00329	-0.00307	-0.01769	-0.03366	-0.03244	-0.01141	0.00417	-0.000653104	-0.00863	-0.01126	-0.01316	-0.02296	-0.03755	-0.04067	-0.03307	-0.02184	-0.01349	-0.01126	-0.01475	-0.02665	-0.03942	-0.03531	-0.01629	-0.00225	0.00125	0.000583199	-0.00231	-0.00171	0.0063	0.01259	0.01501	0.0175	0.01753	0.01892	0.01955	0.00588	-0.01187	-0.01878	-0.01656	-0.0163
0.06077	0.02382	0.05082	0.05415	0.03346	0.01231	0.00274	0.00057175	0.000336649	0.00202	0.00295	-0.00329	-0.01762	-0.03337	-0.03225	-0.01168	0.00349	-0.0014	-0.00922	-0.01167	-0.01338	-0.02301	-0.03743	-0.04046	-0.03297	-0.02198	-0.01368	-0.01135	-0.01471	-0.02647	-0.03906	-0.03489	-0.016	-0.00199	0.00154	0.000937567	-0.00191	-0.00138	0.00655	0.01285	0.01528	0.01774	0.01762	0.01892	0.01962	0.00602	-0.01172	-0.01862	-0.01632	-0.01608
0.06095	0.02371	0.05059	0.05389	0.0333	0.0123	0.00279	0.000499573	9.93361e-05	0.00169	0.00261	-0.0035	-0.01755	-0.03307	-0.03206	-0.01196	0.0028	-0.00214	-0.00981	-0.01208	-0.01359	-0.02306	-0.03731	-0.04025	-0.03287	-0.02211	-0.01387	-0.01144	-0.01466	-0.02628	-0.03869	-0.03446	-0.01569	-0.00172	0.00185	0.00129	-0.00151	-0.00105	0.0068	0.0131	0.01554	0.01797	0.01771	0.01891	0.01966	0.00615	-0.01158	-0.01848	-0.0161	-0.01586
0.06114	0.0236	0.05035	0.05363	0.03315	0.0123	0.00285	0.000434319	-0.000130537	0.00137	0.00226	-0.00371	-0.01747	-0.03277	-0.03187	-0.01223	0.0021	-0.00288	-0.01039	-0.01248	-0.0138	-0.02311	-0.03719	-0.04003	-0.03277	-0.02224	-0.01406	-0.01154	-0.01462	-0.0261	-0.03832	-0.03402	-0.01537	-0.00144	0.00216	0.00166	-0.00111	-0.000723554	0.00705	0.01333	0.0158	0.0182	0.0178	0.01889	0.0197	0.00626	-0.01145	-0.01834	-0.01587	-0.01565
0.06132	0.02349	0.05012	0.05337	0.033	0.0123	0.00291	0.000375833	-0.000353027	0.00105	0.00192	-0.00392	-0.0174	-0.03246	-0.03167	-0.0125	0.00141	-0.00362	-0.01097	-0.01287	-0.01401	-0.02316	-0.03707	-0.0398	-0.03267	-0.02237	-0.01426	-0.01163	-0.01458	-0.02591	-0.03794	-0.03357	-0.01504	-0.00115	0.00247	0.00202	-0.000703453	-0.000392469	0.00729	0.01356	0.01605	0.01842	0.01787	0.01886	0.01972	0.00635	-0.01134	-0.01821	-0.01565	-0.01543
0.06151	0.02339	0.04988	0.05311	0.03284	0.01231	0.00297	0.00032386	-0.000568287	0.000742136	0.00158	-0.00413	-0.01731	-0.03214	-0.03146	-0.01276	0.000721905	-0.00436	-0.01154	-0.01326	-0.01422	-0.02321	-0.03694	-0.03958	-0.03256	-0.0225	-0.01445	-0.01173	-0.01454	-0.02572	-0.03755	-0.0331	-0.0147	-0.000857113	0.0028	0.00238	-0.000299455	-6.13607e-05	0.00753	0.01378	0.01629	0.01863	0.01794	0.01882	0.01972	0.00643	-0.01123	-0.01809	-0.01544	-0.01522
0.06169	0.02328	0.04964	0.05284	0.03268	0.01231	0.00305	0.000278122	-0.000776498	0.000435269	0.00124	-0.00433	-0.01723	-0.03182	-0.03126	-0.01303	3.15692e-05	-0.00509	-0.0121	-0.01365	-0.01443	-0.02326	-0.03682	-0.03935	-0.03245	-0.02263	-0.01465	-0.01183	-0.0145	-0.02552	-0.03715	-0.03263	-0.01434	-0.000551141	0.00312	0.00275	0.000105174	0.000269477	0.00776	0.01399	0.01651	0.01884	0.018	0.01878	0.01971	0.0065	-0.01113	-0.01797	-0.01523	-0.015
0.06188	0.02316	0.0494	0.05257	0.03253	0.01233	0.00313	0.000238342	-0.000977838	0.000133535	0.000908522	-0.00454	-0.01714	-0.0315	-0.03104	-0.01329	-0.000657626	-0.00582	-0.01266	-0.01402	-0.01463	-0.02331	-0.03669	-0.03911	-0.03234	-0.02276	-0.01484	-0.01193	-0.01446	-0.02532	-0.03675	-0.03214	-0.01397	-0.000236442	0.00345	0.00312	0.000510093	0.00059975	0.00798	0.01419	0.01673	0.01904	0.01806	0.01872	0.01968	0.00655	-0.01105	-0.01786	-0.01503	-0.01479
0.06206	0.02305	0.04915	0.05229	0.03237	0.01234	0.00321	0.000204239	-0.00117	-0.000163064	0.000574339	-0.00474	-0.01705	-0.03117	-0.03083	-0.01356	-0.00135	-0.00654	-0.01321	-0.0144	-0.01483	-0.02336	-0.03656	-0.03888	-0.03223	-0.02289	-0.01504	-0.01204	-0.01442	-0.02512	-0.03633	-0.03165	-0.01359	8.66868e-05	0.00379	0.00349	0.000914966	0.000929165	0.0082	0.01437	0.01694	0.01923	0.01811	0.01865	0.01965	0.00658	-0.01097	-0.01775	-0.01483	-0.01458
0.06225	0.02294	0.0489	0.05201	0.03221	0.01236	0.0033	0.000175537	-0.00136	-0.000454525	0.000242244	-0.00495	-0.01696	-0.03083	-0.0306	-0.01381	-0.00203	-0.00726	-0.01375	-0.01476	-0.01503	-0.02342	-0.03642	-0.03864	-0.03212	-0.02302	-0.01524	-0.01214	-0.01438	-0.02492	-0.03592	-0.03114	-0.0132	0.000417948	0.00413	0.00386	0.00132	0.00126	0.00842	0.01455	0.01714	0.01941	0.01815	0.01858	0.01959	0.0066	-0.0109	-0.01766	-0.01463	-0.01437
0.06243	0.02282	0.04865	0.05173	0.03204	0.01238	0.00339	0.000151956	-0.00154	-0.000740847	-8.76152e-05	-0.00515	-0.01686	-0.03049	-0.03038	-0.01407	-0.00271	-0.00797	-0.01428	-0.01512	-0.01522	-0.02347	-0.03629	-0.0384	-0.032	-0.02315	-0.01544	-0.01225	-0.01434	-0.02471	-0.03549	-0.03062	-0.01281	0.000757042	0.00447	0.00423	0.00172	0.00158	0.00863	0.01472	0.01733	0.01959	0.01818	0.01849	0.01952	0.00661	-0.01085	-0.01757	-0.01445	-0.01416
0.06262	0.02271	0.04839	0.05144	0.03188	0.0124	0.00349	0.000133217	-0.00172	-0.00102	-0.000415092	-0.00535	-0.01676	-0.03015	-0.03015	-0.01433	-0.00339	-0.00868	-0.01481	-0.01546	-0.01542	-0.02351	-0.03615	-0.03815	-0.03188	-0.02327	-0.01564	-0.01235	-0.0143	-0.02451	-0.03506	-0.0301	-0.0124	0.0011	0.00482	0.0046	0.00213	0.00191	0.00883	0.01487	0.01751	0.01975	0.0182	0.0184	0.01944	0.0066	-0.0108	-0.01749	-0.01426	-0.01395
0.0628	0.02259	0.04813	0.05115	0.03171	0.01243	0.00359	0.000119043	-0.00189	-0.0013	-0.00074004	-0.00554	-0.01666	-0.02981	-0.02992	-0.01458	-0.00407	-0.00938	-0.01532	-0.0158	-0.0156	-0.02356	-0.03602	-0.0379	-0.03176	-0.0234	-0.01584	-0.01246	-0.01426	-0.0243	-0.03462	-0.02956	-0.01198	0.00146	0.00517	0.00497	0.00253	0.00223	0.00903	0.01502	0.01768	0.01991	0.01822	0.01829	0.01935	0.00657	-0.01077	-0.01741	-0.01409	-0.01375
0.06298	0.02247	0.04787	0.05086	0.03154	0.01245	0.0037	0.000109155	-0.00205	-0.00157	-0.00106	-0.00574	-0.01655	-0.02946	-0.02969	-0.01483	-0.00474	-0.01007	-0.01582	-0.01613	-0.01579	-0.02361	-0.03587	-0.03765	-0.03163	-0.02352	-0.01604	-0.01257	-0.01422	-0.02408	-0.03418	-0.02902	-0.01155	0.00182	0.00552	0.00534	0.00293	0.00255	0.00921	0.01515	0.01784	0.02006	0.01822	0.01818	0.01923	0.00653	-0.01075	-0.01734	-0.01391	-0.01354
0.06317	0.02235	0.0476	0.05056	0.03137	0.01248	0.00381	0.000103274	-0.00221	-0.00183	-0.00138	-0.00593	-0.01644	-0.02911	-0.02945	-0.01507	-0.00541	-0.01076	-0.01631	-0.01645	-0.01597	-0.02366	-0.03573	-0.03739	-0.0315	-0.02364	-0.01624	-0.01268	-0.01418	-0.02387	-0.03373	-0.02847	-0.01111	0.00219	0.00588	0.00571	0.00332	0.00287	0.0094	0.01527	0.01798	0.02019	0.01822	0.01805	0.01911	0.00648	-0.01074	-0.01728	-0.01374	-0.01334
0.06335	0.02223	0.04733	0.05025	0.0312	0.01251	0.00392	0.000101104	-0.00236	-0.0021	-0.0017	-0.00612	-0.01633	-0.02876	-0.02922	-0.01532	-0.00608	-0.01143	-0.0168	-0.01677	-0.01614	-0.0237	-0.03559	-0.03714	-0.03137	-0.02376	-0.01644	-0.01279	-0.01414	-0.02365	-0.03328	-0.02791	-0.01066	0.00256	0.00624	0.00608	0.00372	0.00319	0.00957	0.01538	0.01811	0.02032	0.01821	0.01792	0.01897	0.0064	-0.01073	-0.01723	-0.01358	-0.01314
0.06354	0.0221	0.04706	0.04994	0.03103	0.01255	0.00404	0.000102278	-0.00251	-0.00235	-0.00201	-0.00631	-0.01622	-0.0284	-0.02898	-0.01556	-0.00673	-0.0121	-0.01727	-0.01707	-0.01631	-0.02374	-0.03544	-0.03688	-0.03124	-0.02387	-0.01664	-0.0129	-0.01411	-0.02343	-0.03282	-0.02734	-0.01021	0.00294	0.0066	0.00645	0.00411	0.0035	0.00974	0.01548	0.01824	0.02043	0.01818	0.01778	0.01881	0.00632	-0.01074	-0.01718	-0.01342	-0.01294
0.06372	0.02198	0.04678	0.04963	0.03085	0.01258	0.00416	0.000106411	-0.00265	-0.0026	-0.00232	-0.0065	-0.01611	-0.02805	-0.02874	-0.0158	-0.00739	-0.01276	-0.01772	-0.01736	-0.01647	-0.02378	-0.03529	-0.03661	-0.03111	-0.02399	-0.01684	-0.01302	-0.01407	-0.02321	-0.03236	-0.02677	-0.00974	0.00332	0.00696	0.00681	0.0045	0.00381	0.0099	0.01557	0.01835	0.02054	0.01815	0.01762	0.01864	0.00621	-0.01076	-0.01714	-0.01327	-0.01274
0.06391	0.02185	0.0465	0.04932	0.03067	0.01261	0.00428	0.000113118	-0.00279	-0.00285	-0.00263	-0.00668	-0.01599	-0.02769	-0.0285	-0.01603	-0.00803	-0.01341	-0.01817	-0.01764	-0.01663	-0.02382	-0.03514	-0.03635	-0.03097	-0.0241	-0.01703	-0.01313	-0.01403	-0.02298	-0.03189	-0.02619	-0.00927	0.00372	0.00732	0.00718	0.00489	0.00411	0.01005	0.01564	0.01844	0.02063	0.01811	0.01746	0.01846	0.0061	-0.01079	-0.0171	-0.01312	-0.01254
0.06409	0.02173	0.04622	0.049	0.03049	0.01265	0.0044	0.000122015	-0.00293	-0.00309	-0.00293	-0.00686	-0.01587	-0.02733	-0.02826	-0.01626	-0.00867	-0.01404	-0.0186	-0.01791	-0.01678	-0.02386	-0.03498	-0.03608	-0.03083	-0.02421	-0.01723	-0.01324	-0.01399	-0.02276	-0.03142	-0.0256	-0.00879	0.00411	0.00769	0.00754	0.00527	0.00441	0.01019	0.0157	0.01853	0.02071	0.01806	0.01729	0.01826	0.00596	-0.01083	-0.01707	-0.01298	-0.01234
0.06428	0.0216	0.04594	0.04867	0.0303	0.01268	0.00453	0.000132716	-0.00306	-0.00333	-0.00323	-0.00704	-0.01575	-0.02697	-0.02801	-0.01649	-0.00931	-0.01467	-0.01902	-0.01816	-0.01693	-0.02389	-0.03483	-0.0358	-0.03069	-0.02432	-0.01743	-0.01335	-0.01395	-0.02253	-0.03094	-0.02501	-0.0083	0.00451	0.00805	0.0079	0.00565	0.00471	0.01033	0.01575	0.0186	0.02078	0.018	0.01711	0.01805	0.00582	-0.01089	-0.01705	-0.01284	-0.01214
0.06446	0.02147	0.04565	0.04834	0.03011	0.01272	0.00465	0.000144837	-0.00318	-0.00356	-0.00353	-0.00722	-0.01563	-0.02661	-0.02777	-0.01672	-0.00993	-0.01528	-0.01942	-0.01841	-0.01707	-0.02393	-0.03467	-0.03553	-0.03054	-0.02442	-0.01762	-0.01346	-0.01391	-0.0223	-0.03046	-0.02441	-0.00781	0.00492	0.00842	0.00825	0.00602	0.005	0.01045	0.01578	0.01866	0.02084	0.01793	0.01691	0.01783	0.00565	-0.01095	-0.01704	-0.01271	-0.01195
0.06465	0.02134	0.04535	0.04801	0.02992	0.01275	0.00477	0.000157992	-0.00331	-0.00378	-0.00382	-0.00739	-0.01551	-0.02625	-0.02752	-0.01694	-0.01055	-0.01588	-0.01981	-0.01864	-0.0172	-0.02396	-0.03451	-0.03525	-0.0304	-0.02453	-0.01781	-0.01358	-0.01387	-0.02207	-0.02998	-0.0238	-0.00731	0.00532	0.00879	0.0086	0.00639	0.00528	0.01057	0.01581	0.0187	0.02088	0.01785	0.01671	0.01759	0.00548	-0.01102	-0.01703	-0.01258	-0.01175
0.06483	0.0212	0.04506	0.04767	0.02973	0.01278	0.0049	0.000171797	-0.00343	-0.00401	-0.00411	-0.00756	-0.01538	-0.0259	-0.02728	-0.01716	-0.01116	-0.01647	-0.02019	-0.01886	-0.01733	-0.02398	-0.03434	-0.03497	-0.03025	-0.02463	-0.01801	-0.01369	-0.01383	-0.02184	-0.02949	-0.0232	-0.0068	0.00574	0.00915	0.00895	0.00675	0.00556	0.01068	0.01581	0.01873	0.02092	0.01775	0.0165	0.01734	0.00529	-0.0111	-0.01703	-0.01246	-0.01156
0.06502	0.02107	0.04476	0.04733	0.02953	0.01281	0.00502	0.000185866	-0.00354	-0.00423	-0.0044	-0.00773	-0.01526	-0.02554	-0.02704	-0.01737	-0.01176	-0.01705	-0.02055	-0.01907	-0.01745	-0.02401	-0.03418	-0.03469	-0.03009	-0.02472	-0.01819	-0.0138	-0.01379	-0.0216	-0.029	-0.02258	-0.00629	0.00615	0.00952	0.0093	0.00711	0.00584	0.01078	0.01581	0.01875	0.02094	0.01765	0.01628	0.01707	0.00508	-0.01119	-0.01703	-0.01234	-0.01136
0.0652	0.02093	0.04445	0.04698	0.02932	0.01284	0.00515	0.000199816	-0.00366	-0.00444	-0.00468	-0.0079	-0.01513	-0.02518	-0.02679	-0.01759	-0.01235	-0.01761	-0.0209	-0.01926	-0.01756	-0.02403	-0.03401	-0.03441	-0.02994	-0.02482	-0.01838	-0.01391	-0.01375	-0.02137	-0.02851	-0.02196	-0.00578	0.00657	0.00988	0.00964	0.00746	0.0061	0.01087	0.01579	0.01876	0.02094	0.01754	0.01606	0.0168	0.00486	-0.01129	-0.01704	-0.01222	-0.01117
0.06539	0.02079	0.04415	0.04663	0.02912	0.01286	0.00527	0.000213256	-0.00377	-0.00466	-0.00496	-0.00806	-0.015	-0.02482	-0.02655	-0.01779	-0.01294	-0.01816	-0.02123	-0.01945	-0.01766	-0.02405	-0.03384	-0.03412	-0.02978	-0.02491	-0.01857	-0.01402	-0.01371	-0.02113	-0.02802	-0.02134	-0.00525	0.00699	0.01024	0.00998	0.00781	0.00637	0.01095	0.01576	0.01875	0.02094	0.01741	0.01582	0.0165	0.00463	-0.0114	-0.01706	-0.01211	-0.01098
0.06557	0.02065	0.04384	0.04627	0.02891	0.01289	0.00539	0.00022578	-0.00388	-0.00486	-0.00524	-0.00822	-0.01487	-0.02446	-0.02631	-0.018	-0.01351	-0.01869	-0.02154	-0.01961	-0.01776	-0.02406	-0.03367	-0.03383	-0.02962	-0.025	-0.01875	-0.01413	-0.01367	-0.02089	-0.02752	-0.02072	-0.00473	0.00741	0.01061	0.01031	0.00814	0.00662	0.01101	0.01572	0.01873	0.02092	0.01728	0.01557	0.0162	0.00438	-0.01152	-0.01708	-0.012	-0.01079
0.06576	0.02051	0.04352	0.04591	0.02869	0.01291	0.0055	0.000236976	-0.00399	-0.00507	-0.00551	-0.00838	-0.01474	-0.02411	-0.02606	-0.0182	-0.01407	-0.01921	-0.02184	-0.01977	-0.01784	-0.02407	-0.03349	-0.03354	-0.02946	-0.02508	-0.01893	-0.01423	-0.01363	-0.02065	-0.02702	-0.02009	-0.0042	0.00783	0.01097	0.01064	0.00848	0.00687	0.01107	0.01566	0.0187	0.02088	0.01713	0.01531	0.01588	0.00413	-0.01165	-0.01711	-0.0119	-0.0106
0.06594	0.02037	0.04321	0.04554	0.02847	0.01292	0.00562	0.000246432	-0.0041	-0.00527	-0.00578	-0.00853	-0.01461	-0.02375	-0.02582	-0.01839	-0.01462	-0.01972	-0.02212	-0.01991	-0.01792	-0.02408	-0.03331	-0.03325	-0.0293	-0.02516	-0.0191	-0.01434	-0.01359	-0.02041	-0.02653	-0.01946	-0.00367	0.00826	0.01132	0.01096	0.0088	0.00711	0.01112	0.01559	0.01865	0.02084	0.01698	0.01505	0.01555	0.00385	-0.01178	-0.01715	-0.0118	-0.01041
0.06612	0.02023	0.04289	0.04517	0.02824	0.01294	0.00573	0.000253737	-0.00421	-0.00547	-0.00604	-0.00868	-0.01448	-0.0234	-0.02558	-0.01859	-0.01517	-0.02021	-0.02239	-0.02003	-0.018	-0.02408	-0.03313	-0.03296	-0.02913	-0.02524	-0.01928	-0.01445	-0.01354	-0.02017	-0.02603	-0.01883	-0.00313	0.00868	0.01168	0.01128	0.00912	0.00734	0.01116	0.0155	0.01858	0.02078	0.01681	0.01477	0.01521	0.00357	-0.01193	-0.01719	-0.01171	-0.01022
0.06631	0.02008	0.04256	0.04479	0.02801	0.01294	0.00584	0.00025848	-0.00432	-0.00566	-0.0063	-0.00883	-0.01435	-0.02305	-0.02534	-0.01877	-0.0157	-0.02068	-0.02263	-0.02014	-0.01806	-0.02408	-0.03295	-0.03266	-0.02896	-0.02531	-0.01945	-0.01455	-0.0135	-0.01993	-0.02552	-0.01819	-0.00259	0.00911	0.01203	0.01159	0.00943	0.00756	0.01119	0.0154	0.01851	0.02071	0.01663	0.01449	0.01486	0.00327	-0.01208	-0.01723	-0.01162	-0.01003
0.06649	0.01994	0.04224	0.04441	0.02778	0.01295	0.00594	0.000260249	-0.00442	-0.00585	-0.00656	-0.00898	-0.01421	-0.0227	-0.02511	-0.01896	-0.01621	-0.02114	-0.02287	-0.02024	-0.01811	-0.02408	-0.03277	-0.03237	-0.02879	-0.02538	-0.01962	-0.01465	-0.01345	-0.01968	-0.02502	-0.01756	-0.00205	0.00954	0.01238	0.01189	0.00973	0.00778	0.0112	0.01529	0.01842	0.02062	0.01644	0.0142	0.01449	0.00296	-0.01224	-0.01728	-0.01153	-0.00985
0.06668	0.01979	0.04191	0.04402	0.02753	0.01295	0.00604	0.000258633	-0.00453	-0.00605	-0.00681	-0.00912	-0.01408	-0.02236	-0.02487	-0.01913	-0.01672	-0.02158	-0.02308	-0.02032	-0.01816	-0.02407	-0.03258	-0.03207	-0.02862	-0.02544	-0.01978	-0.01475	-0.01341	-0.01944	-0.02452	-0.01692	-0.0015	0.00996	0.01273	0.01219	0.01002	0.00798	0.01121	0.01516	0.01831	0.02052	0.01624	0.01389	0.01412	0.00264	-0.01241	-0.01734	-0.01145	-0.00966
0.06686	0.01964	0.04157	0.04363	0.02729	0.01294	0.00613	0.000253219	-0.00464	-0.00623	-0.00706	-0.00926	-0.01395	-0.02202	-0.02464	-0.01931	-0.01722	-0.022	-0.02328	-0.02039	-0.0182	-0.02406	-0.03239	-0.03177	-0.02844	-0.02551	-0.01994	-0.01485	-0.01336	-0.0192	-0.02402	-0.01629	-0.000958282	0.01039	0.01307	0.01248	0.01031	0.00818	0.0112	0.01502	0.0182	0.02041	0.01603	0.01358	0.01373	0.00231	-0.01259	-0.0174	-0.01137	-0.00947
0.06705	0.01949	0.04123	0.04324	0.02703	0.01293	0.00622	0.000243597	-0.00475	-0.00642	-0.00731	-0.0094	-0.01382	-0.02168	-0.0244	-0.01948	-0.0177	-0.0224	-0.02346	-0.02045	-0.01823	-0.02405	-0.0322	-0.03147	-0.02827	-0.02556	-0.0201	-0.01494	-0.01332	-0.01895	-0.02351	-0.01565	-0.000411936	0.01081	0.01341	0.01277	0.01058	0.00837	0.01118	0.01487	0.01806	0.02028	0.01581	0.01327	0.01333	0.00196	-0.01278	-0.01746	-0.01129	-0.00929
0.06723	0.01934	0.04089	0.04283	0.02678	0.01291	0.0063	0.000229355	-0.00486	-0.0066	-0.00755	-0.00953	-0.01369	-0.02134	-0.02417	-0.01964	-0.01817	-0.02279	-0.02362	-0.02048	-0.01825	-0.02403	-0.03201	-0.03117	-0.02809	-0.02562	-0.02025	-0.01504	-0.01327	-0.01871	-0.02301	-0.01501	0.000135058	0.01123	0.01374	0.01305	0.01085	0.00855	0.01115	0.0147	0.01792	0.02014	0.01557	0.01294	0.01292	0.00161	-0.01297	-0.01753	-0.01122	-0.0091
0.06742	0.01919	0.04055	0.04243	0.02651	0.01288	0.00638	0.000210097	-0.00497	-0.00679	-0.00779	-0.00966	-0.01356	-0.02101	-0.02394	-0.0198	-0.01862	-0.02316	-0.02376	-0.02051	-0.01826	-0.024	-0.03182	-0.03086	-0.02791	-0.02567	-0.0204	-0.01513	-0.01322	-0.01846	-0.02251	-0.01438	0.000682275	0.01166	0.01407	0.01332	0.01111	0.00872	0.01111	0.01452	0.01776	0.01998	0.01533	0.01261	0.0125	0.00124	-0.01317	-0.0176	-0.01115	-0.00892
0.0676	0.01903	0.0402	0.04202	0.02624	0.01285	0.00645	0.000185486	-0.00509	-0.00697	-0.00803	-0.00979	-0.01343	-0.02068	-0.02372	-0.01996	-0.01907	-0.02352	-0.02389	-0.02052	-0.01826	-0.02398	-0.03162	-0.03056	-0.02772	-0.02571	-0.02055	-0.01522	-0.01317	-0.01821	-0.02201	-0.01374	0.00123	0.01207	0.01439	0.01358	0.01136	0.00888	0.01106	0.01432	0.01759	0.01982	0.01508	0.01226	0.01207	0.000865097	-0.01338	-0.01768	-0.01109	-0.00873
0.06779	0.01888	0.03986	0.0416	0.02596	0.01281	0.00651	0.000155202	-0.0052	-0.00715	-0.00826	-0.00992	-0.0133	-0.02036	-0.02349	-0.02011	-0.0195	-0.02385	-0.024	-0.02051	-0.01826	-0.02394	-0.03142	-0.03026	-0.02754	-0.02575	-0.02069	-0.01531	-0.01312	-0.01797	-0.02151	-0.01311	0.00178	0.01249	0.01471	0.01384	0.01159	0.00903	0.01099	0.01411	0.0174	0.01964	0.01481	0.01191	0.01163	0.000479454	-0.01359	-0.01776	-0.01102	-0.00855
0.06797	0.01872	0.0395	0.04118	0.02568	0.01276	0.00656	0.000118923	-0.00532	-0.00733	-0.00849	-0.01004	-0.01317	-0.02003	-0.02327	-0.02025	-0.01991	-0.02417	-0.02409	-0.02049	-0.01824	-0.02391	-0.03122	-0.02995	-0.02735	-0.02579	-0.02082	-0.01539	-0.01307	-0.01772	-0.02101	-0.01248	0.00232	0.0129	0.01503	0.01409	0.01182	0.00917	0.01091	0.01388	0.0172	0.01944	0.01453	0.01155	0.01118	8.43973e-05	-0.01381	-0.01785	-0.01096	-0.00836
0.06816	0.01857	0.03915	0.04075	0.02538	0.01271	0.0066	7.63297e-05	-0.00545	-0.0075	-0.00871	-0.01016	-0.01304	-0.01972	-0.02305	-0.02039	-0.02031	-0.02446	-0.02416	-0.02046	-0.01822	-0.02387	-0.03102	-0.02965	-0.02716	-0.02582	-0.02095	-0.01547	-0.01302	-0.01748	-0.02052	-0.01185	0.00286	0.01331	0.01533	0.01432	0.01204	0.00929	0.01082	0.01364	0.01699	0.01923	0.01425	0.01119	0.01073	-0.000319683	-0.01403	-0.01794	-0.01091	-0.00818
0.06834	0.01841	0.03879	0.04032	0.02509	0.01264	0.00664	2.71e-05	-0.00557	-0.00768	-0.00893	-0.01028	-0.01292	-0.0194	-0.02283	-0.02053	-0.0207	-0.02474	-0.02421	-0.02041	-0.01819	-0.02382	-0.03081	-0.02934	-0.02697	-0.02585	-0.02108	-0.01555	-0.01297	-0.01723	-0.02003	-0.01122	0.00341	0.01372	0.01564	0.01456	0.01224	0.00941	0.01072	0.01339	0.01677	0.01901	0.01395	0.01081	0.01026	-0.000732396	-0.01426	-0.01803	-0.01085	-0.00799
0.06853	0.01825	0.03843	0.03988	0.02478	0.01257	0.00667	-2.90868e-05	-0.0057	-0.00786	-0.00915	-0.0104	-0.01279	-0.0191	-0.02262	-0.02066	-0.02107	-0.025	-0.02425	-0.02034	-0.01815	-0.02378	-0.03061	-0.02903	-0.02678	-0.02587	-0.0212	-0.01563	-0.01291	-0.01698	-0.01953	-0.0106	0.00395	0.01412	0.01593	0.01478	0.01244	0.00952	0.01061	0.01313	0.01653	0.01878	0.01365	0.01043	0.00978	-0.00115	-0.0145	-0.01813	-0.0108	-0.00781
0.06871	0.01809	0.03806	0.03944	0.02447	0.01249	0.00668	-9.25517e-05	-0.00583	-0.00804	-0.00937	-0.01051	-0.01267	-0.01879	-0.0224	-0.02078	-0.02143	-0.02525	-0.02427	-0.02026	-0.0181	-0.02372	-0.0304	-0.02873	-0.02659	-0.02589	-0.02132	-0.0157	-0.01286	-0.01674	-0.01905	-0.00998	0.00448	0.01452	0.01622	0.01499	0.01262	0.00961	0.01048	0.01285	0.01628	0.01854	0.01333	0.01005	0.0093	-0.00158	-0.01474	-0.01823	-0.01075	-0.00762
0.0689	0.01793	0.0377	0.03899	0.02415	0.0124	0.00669	-0.000163615	-0.00597	-0.00821	-0.00958	-0.01062	-0.01255	-0.01849	-0.02219	-0.0209	-0.02177	-0.02547	-0.02427	-0.02017	-0.01804	-0.02367	-0.03019	-0.02842	-0.02639	-0.02591	-0.02144	-0.01577	-0.0128	-0.0165	-0.01856	-0.00937	0.00502	0.01491	0.0165	0.0152	0.0128	0.00969	0.01034	0.01255	0.01601	0.01828	0.01301	0.00965	0.00881	-0.00202	-0.01499	-0.01833	-0.0107	-0.00744
0.06908	0.01777	0.03733	0.03854	0.02382	0.0123	0.00669	-0.000242599	-0.00611	-0.00839	-0.00979	-0.01073	-0.01243	-0.0182	-0.02199	-0.02101	-0.0221	-0.02567	-0.02425	-0.02007	-0.01798	-0.02361	-0.02998	-0.02812	-0.0262	-0.02592	-0.02154	-0.01584	-0.01275	-0.01625	-0.01808	-0.00876	0.00554	0.0153	0.01678	0.01539	0.01296	0.00976	0.01019	0.01225	0.01574	0.01801	0.01267	0.00925	0.00831	-0.00246	-0.01524	-0.01843	-0.01066	-0.00725
0.06926	0.01761	0.03696	0.03809	0.02348	0.01219	0.00668	-0.000329823	-0.00626	-0.00857	-0.01	-0.01084	-0.01231	-0.01791	-0.02178	-0.02111	-0.02242	-0.02586	-0.02422	-0.01995	-0.0179	-0.02354	-0.02977	-0.02781	-0.026	-0.02592	-0.02165	-0.01591	-0.01269	-0.01601	-0.0176	-0.00815	0.00607	0.01568	0.01704	0.01558	0.01311	0.00982	0.01002	0.01193	0.01545	0.01773	0.01233	0.00885	0.0078	-0.00291	-0.01549	-0.01854	-0.01061	-0.00707
0.06945	0.01744	0.03659	0.03762	0.02314	0.01207	0.00666	-0.000425579	-0.00641	-0.00875	-0.0102	-0.01094	-0.0122	-0.01763	-0.02158	-0.02121	-0.02271	-0.02602	-0.02417	-0.01981	-0.01782	-0.02347	-0.02956	-0.02751	-0.0258	-0.02592	-0.02175	-0.01597	-0.01263	-0.01577	-0.01712	-0.00755	0.00659	0.01606	0.0173	0.01575	0.01325	0.00987	0.00984	0.01159	0.01514	0.01743	0.01198	0.00844	0.00729	-0.00337	-0.01575	-0.01865	-0.01057	-0.00688
0.06963	0.01728	0.03621	0.03716	0.02279	0.01194	0.00662	-0.000530034	-0.00657	-0.00893	-0.01041	-0.01105	-0.01209	-0.01735	-0.02138	-0.02131	-0.023	-0.02617	-0.0241	-0.01967	-0.01773	-0.0234	-0.02934	-0.0272	-0.0256	-0.02592	-0.02184	-0.01603	-0.01257	-0.01552	-0.01665	-0.00695	0.00711	0.01643	0.01755	0.01592	0.01338	0.00991	0.00965	0.01125	0.01483	0.01712	0.01162	0.00802	0.00677	-0.00383	-0.01601	-0.01877	-0.01053	-0.0067
0.06982	0.01712	0.03583	0.03669	0.02243	0.0118	0.00658	-0.000643326	-0.00673	-0.00911	-0.01061	-0.01115	-0.01198	-0.01708	-0.02118	-0.0214	-0.02326	-0.0263	-0.02401	-0.01951	-0.01763	-0.02332	-0.02913	-0.0269	-0.0254	-0.02591	-0.02193	-0.01608	-0.01251	-0.01528	-0.01618	-0.00637	0.00762	0.01679	0.0178	0.01608	0.01349	0.00993	0.00945	0.01089	0.01451	0.01681	0.01125	0.00759	0.00625	-0.0043	-0.01628	-0.01888	-0.0105	-0.00651
0.07	0.01695	0.03545	0.03621	0.02207	0.01164	0.00652	-0.000765592	-0.0069	-0.0093	-0.0108	-0.01125	-0.01187	-0.01681	-0.02099	-0.02148	-0.02351	-0.02641	-0.02391	-0.01933	-0.01753	-0.02324	-0.02891	-0.02659	-0.0252	-0.0259	-0.02201	-0.01613	-0.01245	-0.01504	-0.01572	-0.00578	0.00812	0.01714	0.01803	0.01623	0.01359	0.00994	0.00923	0.01051	0.01417	0.01648	0.01087	0.00717	0.00571	-0.00477	-0.01655	-0.019	-0.01046	-0.00632
0.07019	0.01679	0.03507	0.03573	0.02169	0.01148	0.00646	-0.00089697	-0.00707	-0.00948	-0.011	-0.01135	-0.01177	-0.01655	-0.0208	-0.02155	-0.02375	-0.02649	-0.02379	-0.01915	-0.01741	-0.02316	-0.02869	-0.02629	-0.025	-0.02588	-0.02209	-0.01618	-0.01239	-0.01481	-0.01526	-0.00521	0.00862	0.01749	0.01826	0.01636	0.01369	0.00994	0.009	0.01013	0.01382	0.01614	0.01048	0.00673	0.00518	-0.00525	-0.01682	-0.01912	-0.01042	-0.00614
0.07037	0.01662	0.03469	0.03524	0.02131	0.01131	0.00638	-0.00104	-0.00725	-0.00967	-0.01119	-0.01145	-0.01167	-0.0163	-0.02061	-0.02162	-0.02397	-0.02657	-0.02366	-0.01895	-0.01729	-0.02307	-0.02847	-0.02599	-0.0248	-0.02586	-0.02216	-0.01623	-0.01233	-0.01457	-0.0148	-0.00464	0.00911	0.01783	0.01848	0.01649	0.01377	0.00993	0.00876	0.00973	0.01346	0.01579	0.01009	0.00629	0.00464	-0.00573	-0.0171	-0.01924	-0.01039	-0.00595
0.07056	0.01646	0.0343	0.03476	0.02092	0.01113	0.00629	-0.00119	-0.00744	-0.00986	-0.01139	-0.01154	-0.01157	-0.01605	-0.02043	-0.02169	-0.02418	-0.02662	-0.02351	-0.01874	-0.01716	-0.02298	-0.02825	-0.02569	-0.02459	-0.02583	-0.02223	-0.01627	-0.01227	-0.01434	-0.01436	-0.00407	0.0096	0.01816	0.01869	0.01661	0.01383	0.0099	0.0085	0.00932	0.01309	0.01543	0.00969	0.00585	0.00409	-0.00621	-0.01737	-0.01936	-0.01036	-0.00576
0.07074	0.01629	0.03391	0.03426	0.02053	0.01093	0.00618	-0.00135	-0.00763	-0.01005	-0.01158	-0.01164	-0.01147	-0.01581	-0.02024	-0.02174	-0.02436	-0.02665	-0.02334	-0.01852	-0.01703	-0.02288	-0.02803	-0.02539	-0.02439	-0.0258	-0.02229	-0.01631	-0.01221	-0.0141	-0.01391	-0.00352	0.01007	0.01848	0.01888	0.01671	0.01389	0.00986	0.00824	0.0089	0.01271	0.01506	0.00928	0.0054	0.00354	-0.0067	-0.01765	-0.01948	-0.01033	-0.00558
0.07093	0.01612	0.03352	0.03376	0.02012	0.01073	0.00607	-0.00152	-0.00783	-0.01025	-0.01177	-0.01173	-0.01138	-0.01557	-0.02006	-0.02179	-0.02454	-0.02667	-0.02316	-0.01829	-0.01689	-0.02278	-0.02781	-0.02509	-0.02419	-0.02577	-0.02235	-0.01635	-0.01214	-0.01387	-0.01347	-0.00297	0.01054	0.0188	0.01907	0.01681	0.01393	0.00981	0.00796	0.00847	0.01232	0.01468	0.00886	0.00495	0.00299	-0.00719	-0.01793	-0.01961	-0.0103	-0.00539
0.07111	0.01596	0.03313	0.03326	0.01971	0.01051	0.00594	-0.0017	-0.00804	-0.01045	-0.01195	-0.01183	-0.0113	-0.01535	-0.01989	-0.02184	-0.0247	-0.02667	-0.02297	-0.01805	-0.01674	-0.02268	-0.02759	-0.02479	-0.02398	-0.02573	-0.0224	-0.01639	-0.01208	-0.01364	-0.01304	-0.00243	0.011	0.0191	0.01925	0.01689	0.01396	0.00975	0.00767	0.00803	0.01192	0.01429	0.00844	0.0045	0.00243	-0.00769	-0.01822	-0.01973	-0.01027	-0.0052
0.0713	0.01579	0.03274	0.03276	0.01929	0.01028	0.0058	-0.00188	-0.00825	-0.01065	-0.01214	-0.01192	-0.01121	-0.01512	-0.01972	-0.02188	-0.02484	-0.02664	-0.02276	-0.01779	-0.01659	-0.02258	-0.02737	-0.02449	-0.02377	-0.02568	-0.02245	-0.01642	-0.01201	-0.01341	-0.01261	-0.0019	0.01145	0.0194	0.01942	0.01697	0.01398	0.00968	0.00737	0.00757	0.01151	0.01389	0.00801	0.00404	0.00188	-0.00818	-0.0185	-0.01986	-0.01024	-0.00501
0.07148	0.01562	0.03235	0.03224	0.01887	0.01004	0.00565	-0.00208	-0.00847	-0.01085	-0.01233	-0.01202	-0.01114	-0.01491	-0.01955	-0.02191	-0.02496	-0.02661	-0.02253	-0.01753	-0.01643	-0.02247	-0.02714	-0.0242	-0.02357	-0.02564	-0.02249	-0.01644	-0.01195	-0.01319	-0.01219	-0.00138	0.0119	0.01968	0.01958	0.01703	0.01399	0.00959	0.00705	0.0071	0.0111	0.01348	0.00758	0.00358	0.00131	-0.00868	-0.01878	-0.01998	-0.01021	-0.00482
0.07167	0.01546	0.03196	0.03173	0.01843	0.00979	0.00549	-0.00229	-0.00869	-0.01106	-0.01251	-0.01211	-0.01106	-0.0147	-0.01938	-0.02193	-0.02508	-0.02655	-0.02229	-0.01726	-0.01626	-0.02235	-0.02692	-0.02391	-0.02336	-0.02558	-0.02253	-0.01647	-0.01189	-0.01296	-0.01178	-0.000872308	0.01233	0.01996	0.01973	0.01708	0.01398	0.00949	0.00672	0.00663	0.01067	0.01307	0.00714	0.00312	0.000751025	-0.00918	-0.01907	-0.02011	-0.01019	-0.00463
0.07185	0.01529	0.03156	0.03121	0.01799	0.00953	0.00531	-0.00251	-0.00893	-0.01127	-0.0127	-0.01221	-0.01099	-0.0145	-0.01922	-0.02195	-0.02517	-0.02648	-0.02204	-0.01697	-0.01609	-0.02224	-0.02669	-0.02361	-0.02315	-0.02553	-0.02256	-0.01649	-0.01182	-0.01274	-0.01137	-0.000370669	0.01275	0.02022	0.01987	0.01713	0.01396	0.00938	0.00638	0.00614	0.01023	0.01264	0.0067	0.00266	0.000185928	-0.00968	-0.01935	-0.02024	-0.01016	-0.00444
0.07204	0.01512	0.03116	0.03069	0.01754	0.00926	0.00512	-0.00274	-0.00917	-0.01148	-0.01288	-0.0123	-0.01093	-0.0143	-0.01905	-0.02197	-0.02525	-0.02639	-0.02177	-0.01668	-0.01592	-0.02212	-0.02647	-0.02332	-0.02295	-0.02547	-0.02258	-0.01651	-0.01176	-0.01252	-0.01097	0.000121063	0.01317	0.02048	0.02	0.01716	0.01393	0.00925	0.00603	0.00564	0.00979	0.01221	0.00625	0.00219	-0.000380426	-0.01018	-0.01964	-0.02036	-0.01013	-0.00425
0.07222	0.01496	0.03077	0.03017	0.01709	0.00898	0.00492	-0.00298	-0.00942	-0.0117	-0.01307	-0.0124	-0.01087	-0.01412	-0.0189	-0.02197	-0.02531	-0.02628	-0.02149	-0.01638	-0.01573	-0.022	-0.02624	-0.02303	-0.02274	-0.0254	-0.0226	-0.01653	-0.01169	-0.01231	-0.01057	0.000602602	0.01357	0.02072	0.02012	0.01718	0.01389	0.00912	0.00567	0.00514	0.00933	0.01177	0.00579	0.00172	-0.000947639	-0.01068	-0.01992	-0.02049	-0.01011	-0.00406
0.0724	0.01479	0.03037	0.02964	0.01662	0.00868	0.00471	-0.00323	-0.00967	-0.01192	-0.01325	-0.01249	-0.01082	-0.01394	-0.01874	-0.02197	-0.02536	-0.02615	-0.0212	-0.01607	-0.01555	-0.02187	-0.02602	-0.02275	-0.02253	-0.02533	-0.02262	-0.01654	-0.01162	-0.01209	-0.01018	0.00107	0.01396	0.02095	0.02022	0.01719	0.01383	0.00897	0.0053	0.00462	0.00887	0.01133	0.00534	0.00125	-0.00152	-0.01118	-0.02021	-0.02062	-0.01008	-0.00387
0.07259	0.01462	0.02997	0.02911	0.01615	0.00838	0.00448	-0.00348	-0.00993	-0.01214	-0.01344	-0.01259	-0.01077	-0.01376	-0.01859	-0.02197	-0.0254	-0.02601	-0.02089	-0.01576	-0.01536	-0.02174	-0.02579	-0.02246	-0.02232	-0.02526	-0.02263	-0.01655	-0.01156	-0.01188	-0.0098	0.00153	0.01434	0.02117	0.02032	0.01719	0.01377	0.00881	0.00492	0.0041	0.00841	0.01087	0.00487	0.000780417	-0.00208	-0.01168	-0.02049	-0.02074	-0.01006	-0.00368
0.07277	0.01446	0.02958	0.02857	0.01568	0.00806	0.00424	-0.00375	-0.0102	-0.01237	-0.01362	-0.01269	-0.01073	-0.0136	-0.01844	-0.02196	-0.02542	-0.02586	-0.02058	-0.01543	-0.01516	-0.02161	-0.02556	-0.02218	-0.02212	-0.02518	-0.02264	-0.01656	-0.01149	-0.01168	-0.00943	0.00198	0.01471	0.02138	0.0204	0.01717	0.01369	0.00864	0.00453	0.00357	0.00793	0.01042	0.00441	0.000309642	-0.00265	-0.01218	-0.02077	-0.02087	-0.01004	-0.00349
0.07296	0.01429	0.02918	0.02804	0.01519	0.00773	0.00399	-0.00403	-0.01048	-0.0126	-0.01381	-0.01279	-0.01069	-0.01344	-0.0183	-0.02194	-0.02542	-0.02568	-0.02025	-0.0151	-0.01497	-0.02148	-0.02534	-0.0219	-0.02191	-0.0251	-0.02264	-0.01656	-0.01143	-0.01147	-0.00906	0.00242	0.01507	0.02158	0.02048	0.01715	0.0136	0.00846	0.00413	0.00303	0.00745	0.00995	0.00394	-0.000161293	-0.00322	-0.01268	-0.02106	-0.02099	-0.01001	-0.0033
0.07314	0.01413	0.02878	0.0275	0.01471	0.0074	0.00373	-0.00431	-0.01076	-0.01284	-0.014	-0.01289	-0.01066	-0.01329	-0.01816	-0.02191	-0.02541	-0.02549	-0.01991	-0.01477	-0.01476	-0.02135	-0.02511	-0.02162	-0.0217	-0.02502	-0.02264	-0.01657	-0.01136	-0.01127	-0.00871	0.00285	0.01542	0.02177	0.02054	0.01712	0.0135	0.00827	0.00371	0.00248	0.00697	0.00948	0.00347	-0.000632045	-0.00378	-0.01317	-0.02134	-0.02111	-0.00999	-0.00311
0.07333	0.01396	0.02838	0.02695	0.01421	0.00705	0.00346	-0.00461	-0.01105	-0.01308	-0.01418	-0.01299	-0.01064	-0.01315	-0.01802	-0.02188	-0.02539	-0.02529	-0.01957	-0.01443	-0.01456	-0.02121	-0.02489	-0.02134	-0.02149	-0.02493	-0.02263	-0.01657	-0.0113	-0.01107	-0.00836	0.00326	0.01575	0.02194	0.02059	0.01707	0.01339	0.00806	0.00329	0.00192	0.00648	0.00901	0.003	-0.0011	-0.00435	-0.01366	-0.02161	-0.02123	-0.00996	-0.00292
0.07351	0.0138	0.02798	0.02641	0.01371	0.00669	0.00317	-0.00491	-0.01135	-0.01333	-0.01437	-0.0131	-0.01062	-0.01301	-0.01788	-0.02184	-0.02535	-0.02507	-0.01921	-0.01408	-0.01435	-0.02107	-0.02466	-0.02107	-0.02128	-0.02484	-0.02262	-0.01656	-0.01124	-0.01088	-0.00801	0.00366	0.01607	0.0221	0.02063	0.01702	0.01327	0.00785	0.00286	0.00136	0.00598	0.00853	0.00253	-0.00157	-0.00491	-0.01415	-0.02189	-0.02135	-0.00994	-0.00273
0.0737	0.01364	0.02758	0.02586	0.0132	0.00632	0.00288	-0.00523	-0.01165	-0.01358	-0.01456	-0.01321	-0.01061	-0.01289	-0.01775	-0.0218	-0.0253	-0.02484	-0.01884	-0.01372	-0.01414	-0.02093	-0.02443	-0.02079	-0.02108	-0.02474	-0.0226	-0.01656	-0.01117	-0.01068	-0.00768	0.00405	0.01638	0.02225	0.02065	0.01695	0.01313	0.00763	0.00242	0.000794813	0.00548	0.00805	0.00205	-0.00204	-0.00547	-0.01464	-0.02216	-0.02147	-0.00992	-0.00254
0.07388	0.01347	0.02719	0.02531	0.01269	0.00595	0.00257	-0.00555	-0.01197	-0.01384	-0.01476	-0.01332	-0.0106	-0.01277	-0.01762	-0.02175	-0.02523	-0.02459	-0.01846	-0.01337	-0.01393	-0.02079	-0.02421	-0.02052	-0.02087	-0.02464	-0.02258	-0.01655	-0.01111	-0.0105	-0.00735	0.00443	0.01667	0.02238	0.02067	0.01688	0.01299	0.00739	0.00197	0.00022069	0.00497	0.00756	0.00158	-0.00251	-0.00603	-0.01513	-0.02244	-0.02159	-0.00989	-0.00235
0.07407	0.01331	0.02679	0.02476	0.01217	0.00556	0.00225	-0.00588	-0.01228	-0.0141	-0.01495	-0.01343	-0.0106	-0.01265	-0.0175	-0.0217	-0.02515	-0.02433	-0.01808	-0.01301	-0.01371	-0.02064	-0.02398	-0.02025	-0.02066	-0.02454	-0.02256	-0.01654	-0.01105	-0.01031	-0.00704	0.0048	0.01695	0.0225	0.02067	0.01679	0.01283	0.00715	0.00152	-0.000358895	0.00446	0.00707	0.0011	-0.00297	-0.00658	-0.01561	-0.0227	-0.02171	-0.00987	-0.00217
0.07425	0.01315	0.02639	0.02421	0.01165	0.00516	0.00192	-0.00622	-0.01261	-0.01436	-0.01514	-0.01355	-0.01061	-0.01255	-0.01737	-0.02164	-0.02506	-0.02406	-0.01769	-0.01264	-0.0135	-0.0205	-0.02376	-0.01999	-0.02045	-0.02443	-0.02253	-0.01653	-0.01099	-0.01013	-0.00673	0.00515	0.01722	0.02261	0.02067	0.01669	0.01267	0.00689	0.00105	-0.000943479	0.00395	0.00658	0.000622009	-0.00343	-0.00713	-0.01608	-0.02297	-0.02182	-0.00985	-0.00198
0.07444	0.01299	0.026	0.02366	0.01112	0.00476	0.00158	-0.00657	-0.01294	-0.01463	-0.01534	-0.01367	-0.01063	-0.01245	-0.01726	-0.02157	-0.02495	-0.02377	-0.01728	-0.01227	-0.01328	-0.02035	-0.02354	-0.01972	-0.02025	-0.02432	-0.0225	-0.01652	-0.01093	-0.00996	-0.00643	0.00549	0.01747	0.0227	0.02065	0.01658	0.01249	0.00663	0.000584266	-0.00153	0.00343	0.00609	0.000145678	-0.00389	-0.00768	-0.01656	-0.02323	-0.02193	-0.00983	-0.00179
0.07462	0.01283	0.0256	0.0231	0.01059	0.00435	0.00123	-0.00692	-0.01328	-0.0149	-0.01554	-0.01379	-0.01065	-0.01237	-0.01714	-0.0215	-0.02483	-0.02348	-0.01688	-0.0119	-0.01306	-0.0202	-0.02331	-0.01946	-0.02004	-0.02421	-0.02246	-0.0165	-0.01087	-0.00978	-0.00614	0.00581	0.01771	0.02278	0.02061	0.01647	0.01231	0.00636	0.000107133	-0.00213	0.00291	0.00559	-0.000329932	-0.00435	-0.00822	-0.01703	-0.02349	-0.02204	-0.0098	-0.00161
0.07481	0.01267	0.02521	0.02255	0.01005	0.00392	0.000876134	-0.00728	-0.01362	-0.01518	-0.01574	-0.01392	-0.01068	-0.01229	-0.01703	-0.02142	-0.0247	-0.02317	-0.01646	-0.01153	-0.01284	-0.02005	-0.02309	-0.0192	-0.01984	-0.02409	-0.02242	-0.01649	-0.01081	-0.00961	-0.00586	0.00612	0.01794	0.02285	0.02057	0.01634	0.01212	0.00608	-0.000376282	-0.00272	0.00239	0.00509	-0.000804412	-0.0048	-0.00876	-0.01749	-0.02375	-0.02215	-0.00978	-0.00143
0.07499	0.01251	0.02482	0.02199	0.00951	0.0035	0.000508428	-0.00765	-0.01397	-0.01546	-0.01594	-0.01405	-0.01072	-0.01221	-0.01692	-0.02134	-0.02455	-0.02284	-0.01604	-0.01116	-0.01262	-0.0199	-0.02287	-0.01895	-0.01963	-0.02398	-0.02238	-0.01647	-0.01075	-0.00945	-0.00559	0.00642	0.01815	0.02291	0.02052	0.0162	0.01191	0.00579	-0.000865563	-0.00332	0.00187	0.0046	-0.00128	-0.00525	-0.00929	-0.01795	-0.024	-0.02226	-0.00976	-0.00125
0.07518	0.01236	0.02442	0.02143	0.00897	0.00306	0.000131756	-0.00803	-0.01432	-0.01575	-0.01615	-0.01419	-0.01076	-0.01215	-0.01681	-0.02125	-0.0244	-0.02251	-0.01561	-0.01078	-0.0124	-0.01975	-0.02265	-0.01869	-0.01943	-0.02386	-0.02233	-0.01645	-0.0107	-0.00929	-0.00532	0.0067	0.01834	0.02295	0.02045	0.01605	0.0117	0.00549	-0.00136	-0.00393	0.00134	0.0041	-0.00175	-0.0057	-0.00982	-0.0184	-0.02425	-0.02236	-0.00974	-0.00107
0.07536	0.0122	0.02403	0.02087	0.00842	0.00262	-0.000253574	-0.00841	-0.01468	-0.01604	-0.01635	-0.01433	-0.01082	-0.01209	-0.0167	-0.02116	-0.02423	-0.02216	-0.01518	-0.0104	-0.01218	-0.0196	-0.02243	-0.01844	-0.01922	-0.02373	-0.02228	-0.01643	-0.01064	-0.00914	-0.00507	0.00697	0.01853	0.02297	0.02037	0.0159	0.01148	0.00519	-0.00186	-0.00453	0.000814136	0.0036	-0.00222	-0.00614	-0.01034	-0.01885	-0.02449	-0.02246	-0.00972	-0.000890727
0.07554	0.01205	0.02365	0.02032	0.00787	0.00216	-0.000647231	-0.0088	-0.01505	-0.01633	-0.01657	-0.01447	-0.01088	-0.01204	-0.0166	-0.02106	-0.02405	-0.02181	-0.01474	-0.01003	-0.01197	-0.01945	-0.02222	-0.01819	-0.01902	-0.02361	-0.02223	-0.01641	-0.01059	-0.00899	-0.00483	0.00723	0.01869	0.02298	0.02028	0.01573	0.01125	0.00488	-0.00236	-0.00514	0.000286557	0.00309	-0.00268	-0.00657	-0.01086	-0.01929	-0.02473	-0.02256	-0.0097	-0.000715835
0.07573	0.01189	0.02326	0.01976	0.00731	0.00171	-0.00105	-0.00919	-0.01542	-0.01663	-0.01678	-0.01462	-0.01095	-0.012	-0.01651	-0.02095	-0.02386	-0.02145	-0.0143	-0.00965	-0.01175	-0.0193	-0.022	-0.01795	-0.01882	-0.02348	-0.02217	-0.01639	-0.01054	-0.00884	-0.00459	0.00747	0.01884	0.02298	0.02018	0.01556	0.01101	0.00456	-0.00287	-0.00574	-0.000241494	0.0026	-0.00315	-0.007	-0.01137	-0.01973	-0.02497	-0.02265	-0.00968	-0.000543342
0.07591	0.01174	0.02287	0.0192	0.00676	0.00124	-0.00146	-0.00959	-0.01579	-0.01694	-0.01699	-0.01477	-0.01102	-0.01197	-0.01641	-0.02085	-0.02366	-0.02107	-0.01386	-0.00927	-0.01153	-0.01915	-0.02179	-0.0177	-0.01862	-0.02335	-0.02211	-0.01637	-0.01049	-0.0087	-0.00437	0.0077	0.01898	0.02297	0.02006	0.01537	0.01077	0.00423	-0.00339	-0.00635	-0.000769669	0.0021	-0.0036	-0.00743	-0.01187	-0.02016	-0.0252	-0.02275	-0.00966	-0.000373467
0.0761	0.01159	0.02249	0.01864	0.0062	0.000775068	-0.00187	-0.01	-0.01617	-0.01725	-0.01721	-0.01493	-0.01111	-0.01195	-0.01632	-0.02073	-0.02344	-0.02069	-0.01341	-0.0089	-0.01131	-0.01899	-0.02157	-0.01746	-0.01841	-0.02321	-0.02205	-0.01634	-0.01045	-0.00856	-0.00415	0.00791	0.0191	0.02294	0.01994	0.01518	0.01052	0.0039	-0.0039	-0.00696	-0.0013	0.0016	-0.00406	-0.00785	-0.01237	-0.02058	-0.02542	-0.02284	-0.00964	-0.000206431
0.07628	0.01144	0.02211	0.01808	0.00563	0.000300695	-0.0023	-0.01041	-0.01656	-0.01756	-0.01744	-0.01509	-0.01121	-0.01193	-0.01623	-0.02061	-0.02322	-0.0203	-0.01295	-0.00852	-0.0111	-0.01884	-0.02136	-0.01722	-0.01821	-0.02308	-0.02199	-0.01632	-0.0104	-0.00843	-0.00395	0.00811	0.0192	0.02289	0.0198	0.01497	0.01026	0.00357	-0.00442	-0.00757	-0.00182	0.0011	-0.00451	-0.00826	-0.01286	-0.021	-0.02564	-0.02292	-0.00962	-4.24537e-05
0.07647	0.01129	0.02173	0.01753	0.00507	-0.000178535	-0.00272	-0.01082	-0.01695	-0.01787	-0.01766	-0.01526	-0.01131	-0.01192	-0.01614	-0.02049	-0.02299	-0.0199	-0.0125	-0.00815	-0.01089	-0.01869	-0.02115	-0.01699	-0.01801	-0.02294	-0.02192	-0.0163	-0.01036	-0.0083	-0.00376	0.00829	0.01929	0.02284	0.01965	0.01476	0.00999	0.00323	-0.00494	-0.00818	-0.00235	0.000606406	-0.00496	-0.00866	-0.01334	-0.0214	-0.02586	-0.02301	-0.0096	0.000118244
0.07665	0.01115	0.02135	0.01697	0.00451	-0.000662201	-0.00316	-0.01124	-0.01734	-0.01819	-0.01789	-0.01543	-0.01142	-0.01192	-0.01606	-0.02037	-0.02275	-0.01949	-0.01204	-0.00777	-0.01068	-0.01854	-0.02094	-0.01676	-0.01782	-0.0228	-0.02185	-0.01627	-0.01032	-0.00818	-0.00357	0.00846	0.01937	0.02276	0.01949	0.01454	0.00972	0.00288	-0.00546	-0.00879	-0.00288	0.000113595	-0.0054	-0.00906	-0.01382	-0.02181	-0.02607	-0.02309	-0.00959	0.000275443
0.07684	0.011	0.02098	0.01642	0.00394	-0.00115	-0.0036	-0.01166	-0.01773	-0.01852	-0.01812	-0.01561	-0.01154	-0.01193	-0.01598	-0.02023	-0.0225	-0.01907	-0.01158	-0.0074	-0.01047	-0.01839	-0.02073	-0.01653	-0.01762	-0.02266	-0.02179	-0.01625	-0.01028	-0.00807	-0.0034	0.00861	0.01943	0.02268	0.01932	0.01432	0.00944	0.00253	-0.00598	-0.00939	-0.0034	-0.000376776	-0.00583	-0.00945	-0.01428	-0.0222	-0.02628	-0.02317	-0.00957	0.000428923
0.07702	0.01086	0.0206	0.01586	0.00338	-0.00164	-0.00404	-0.01209	-0.01813	-0.01884	-0.01835	-0.01579	-0.01167	-0.01194	-0.01591	-0.0201	-0.02224	-0.01865	-0.01112	-0.00704	-0.01026	-0.01824	-0.02053	-0.0163	-0.01742	-0.02252	-0.02171	-0.01623	-0.01024	-0.00796	-0.00323	0.00875	0.01947	0.02258	0.01914	0.01408	0.00916	0.00218	-0.00651	-0.00999	-0.00392	-0.000864366	-0.00627	-0.00984	-0.01474	-0.02259	-0.02648	-0.02324	-0.00955	0.000578463
0.07721	0.01071	0.02023	0.01531	0.00281	-0.00214	-0.00449	-0.01251	-0.01853	-0.01917	-0.01859	-0.01598	-0.01181	-0.01197	-0.01583	-0.01996	-0.02197	-0.01822	-0.01066	-0.00667	-0.01006	-0.01809	-0.02033	-0.01608	-0.01723	-0.02237	-0.02164	-0.0162	-0.01021	-0.00785	-0.00308	0.00888	0.0195	0.02247	0.01895	0.01384	0.00887	0.00182	-0.00703	-0.0106	-0.00444	-0.00135	-0.00669	-0.01021	-0.01519	-0.02297	-0.02667	-0.02331	-0.00954	0.000723844
0.07739	0.01057	0.01987	0.01476	0.00224	-0.00263	-0.00494	-0.01294	-0.01894	-0.01951	-0.01883	-0.01618	-0.01195	-0.012	-0.01577	-0.01982	-0.0217	-0.01779	-0.01019	-0.00631	-0.00986	-0.01794	-0.02012	-0.01586	-0.01703	-0.02223	-0.02157	-0.01618	-0.01018	-0.00775	-0.00294	0.00899	0.01951	0.02234	0.01874	0.01359	0.00857	0.00146	-0.00755	-0.01119	-0.00496	-0.00183	-0.00711	-0.01058	-0.01563	-0.02334	-0.02686	-0.02338	-0.00953	0.000864846
0.07758	0.01044	0.0195	0.01422	0.00168	-0.00313	-0.0054	-0.01338	-0.01934	-0.01984	-0.01907	-0.01638	-0.01211	-0.01204	-0.0157	-0.01968	-0.02141	-0.01735	-0.00973	-0.00595	-0.00966	-0.01779	-0.01993	-0.01564	-0.01684	-0.02208	-0.02149	-0.01616	-0.01015	-0.00766	-0.0028	0.00908	0.0195	0.0222	0.01853	0.01333	0.00828	0.0011	-0.00808	-0.01179	-0.00547	-0.00231	-0.00752	-0.01094	-0.01606	-0.0237	-0.02704	-0.02344	-0.00952	0.001
0.07776	0.0103	0.01914	0.01367	0.00111	-0.00363	-0.00586	-0.01381	-0.01975	-0.02018	-0.01932	-0.01659	-0.01228	-0.01209	-0.01564	-0.01953	-0.02112	-0.0169	-0.00926	-0.0056	-0.00947	-0.01765	-0.01973	-0.01542	-0.01665	-0.02193	-0.02141	-0.01614	-0.01013	-0.00757	-0.00268	0.00916	0.01949	0.02204	0.01831	0.01307	0.00797	0.000732904	-0.0086	-0.01238	-0.00598	-0.00278	-0.00792	-0.01129	-0.01648	-0.02405	-0.02722	-0.02351	-0.00951	0.00113
0.07795	0.01016	0.01878	0.01313	0.000543661	-0.00414	-0.00632	-0.01424	-0.02016	-0.02052	-0.01957	-0.0168	-0.01245	-0.01214	-0.01558	-0.01938	-0.02083	-0.01645	-0.0088	-0.00525	-0.00928	-0.0175	-0.01953	-0.01521	-0.01646	-0.02178	-0.02134	-0.01611	-0.01011	-0.00749	-0.00257	0.00923	0.01945	0.02188	0.01807	0.0128	0.00767	0.000366279	-0.00912	-0.01296	-0.00649	-0.00325	-0.00832	-0.01163	-0.01689	-0.0244	-0.02739	-0.02356	-0.0095	0.00126
0.07813	0.01003	0.01843	0.01259	-2.05448e-05	-0.00464	-0.00678	-0.01468	-0.02057	-0.02087	-0.01982	-0.01702	-0.01263	-0.01221	-0.01552	-0.01922	-0.02052	-0.016	-0.00834	-0.0049	-0.00909	-0.01736	-0.01934	-0.015	-0.01627	-0.02163	-0.02126	-0.0161	-0.01009	-0.00741	-0.00247	0.00928	0.0194	0.02169	0.01782	0.01252	0.00736	-1.65002e-06	-0.00963	-0.01354	-0.00699	-0.00371	-0.00871	-0.01196	-0.01729	-0.02473	-0.02755	-0.02362	-0.00949	0.00138
0.07832	0.0099	0.01808	0.01205	-0.00058324	-0.00514	-0.00724	-0.01511	-0.02098	-0.02121	-0.02007	-0.01725	-0.01283	-0.01228	-0.01547	-0.01907	-0.02021	-0.01554	-0.00787	-0.00456	-0.0089	-0.01722	-0.01915	-0.0148	-0.01608	-0.02148	-0.02118	-0.01608	-0.01007	-0.00734	-0.00238	0.00931	0.01934	0.0215	0.01757	0.01224	0.00704	-0.000370455	-0.01015	-0.01412	-0.00749	-0.00417	-0.00909	-0.01228	-0.01768	-0.02506	-0.02771	-0.02367	-0.00949	0.0015
0.0785	0.00977	0.01773	0.01152	-0.00114	-0.00565	-0.00771	-0.01555	-0.02139	-0.02156	-0.02033	-0.01748	-0.01303	-0.01236	-0.01542	-0.01891	-0.0199	-0.01508	-0.00741	-0.00422	-0.00872	-0.01708	-0.01896	-0.01459	-0.01589	-0.02133	-0.0211	-0.01606	-0.01006	-0.00727	-0.0023	0.00933	0.01926	0.02129	0.0173	0.01195	0.00673	-0.000739709	-0.01066	-0.01469	-0.00798	-0.00463	-0.00946	-0.01259	-0.01806	-0.02538	-0.02786	-0.02372	-0.00948	0.00161
0.07868	0.00964	0.01739	0.01099	-0.0017	-0.00615	-0.00817	-0.01598	-0.02181	-0.02191	-0.02059	-0.01772	-0.01324	-0.01245	-0.01537	-0.01874	-0.01957	-0.01462	-0.00695	-0.00389	-0.00855	-0.01694	-0.01877	-0.01439	-0.01571	-0.02118	-0.02102	-0.01604	-0.01005	-0.00721	-0.00223	0.00934	0.01916	0.02107	0.01703	0.01165	0.00641	-0.00111	-0.01117	-0.01526	-0.00847	-0.00508	-0.00982	-0.01289	-0.01843	-0.02569	-0.02801	-0.02376	-0.00948	0.00171
0.07887	0.00951	0.01705	0.01047	-0.00226	-0.00666	-0.00863	-0.01642	-0.02222	-0.02226	-0.02086	-0.01796	-0.01346	-0.01254	-0.01533	-0.01858	-0.01925	-0.01415	-0.00649	-0.00356	-0.00838	-0.0168	-0.01858	-0.0142	-0.01553	-0.02103	-0.02094	-0.01603	-0.01005	-0.00716	-0.00217	0.00933	0.01905	0.02084	0.01675	0.01135	0.00609	-0.00148	-0.01167	-0.01581	-0.00896	-0.00552	-0.01018	-0.01318	-0.01879	-0.02599	-0.02815	-0.0238	-0.00948	0.00181
0.07905	0.00939	0.01671	0.00994	-0.00281	-0.00716	-0.0091	-0.01685	-0.02263	-0.02261	-0.02112	-0.01821	-0.01369	-0.01265	-0.0153	-0.01842	-0.01892	-0.01368	-0.00604	-0.00324	-0.00821	-0.01666	-0.0184	-0.014	-0.01534	-0.02087	-0.02086	-0.01602	-0.01005	-0.00711	-0.00212	0.00931	0.01893	0.0206	0.01645	0.01105	0.00576	-0.00185	-0.01217	-0.01637	-0.00944	-0.00596	-0.01052	-0.01346	-0.01914	-0.02628	-0.02828	-0.02384	-0.00948	0.0019
0.07924	0.00927	0.01638	0.00943	-0.00336	-0.00766	-0.00956	-0.01728	-0.02304	-0.02296	-0.02139	-0.01847	-0.01393	-0.01276	-0.01526	-0.01825	-0.01858	-0.01321	-0.00558	-0.00292	-0.00804	-0.01652	-0.01822	-0.01381	-0.01516	-0.02072	-0.02078	-0.01601	-0.01005	-0.00707	-0.00208	0.00927	0.01879	0.02034	0.01615	0.01073	0.00544	-0.00221	-0.01266	-0.01691	-0.00991	-0.00639	-0.01086	-0.01372	-0.01947	-0.02656	-0.02841	-0.02388	-0.00949	0.00199
0.07942	0.00915	0.01605	0.00891	-0.00391	-0.00815	-0.01002	-0.01771	-0.02345	-0.02332	-0.02166	-0.01874	-0.01418	-0.01288	-0.01523	-0.01808	-0.01824	-0.01274	-0.00513	-0.00261	-0.00788	-0.01639	-0.01804	-0.01362	-0.01498	-0.02056	-0.0207	-0.016	-0.01005	-0.00704	-0.00205	0.00922	0.01864	0.02007	0.01584	0.01042	0.00511	-0.00258	-0.01315	-0.01745	-0.01038	-0.00682	-0.01119	-0.01398	-0.0198	-0.02683	-0.02853	-0.02391	-0.0095	0.00207
0.07961	0.00903	0.01573	0.0084	-0.00445	-0.00865	-0.01048	-0.01813	-0.02386	-0.02367	-0.02194	-0.01901	-0.01444	-0.01301	-0.01521	-0.01791	-0.0179	-0.01226	-0.00468	-0.0023	-0.00773	-0.01626	-0.01786	-0.01343	-0.0148	-0.02041	-0.02062	-0.01599	-0.01006	-0.00701	-0.00203	0.00916	0.01847	0.01979	0.01552	0.0101	0.00479	-0.00294	-0.01363	-0.01797	-0.01084	-0.00724	-0.0115	-0.01422	-0.02011	-0.02709	-0.02864	-0.02393	-0.0095	0.00214
0.07979	0.00891	0.01541	0.0079	-0.00499	-0.00914	-0.01093	-0.01855	-0.02426	-0.02403	-0.02221	-0.01928	-0.01471	-0.01315	-0.01518	-0.01774	-0.01755	-0.01179	-0.00424	-0.002	-0.00758	-0.01613	-0.01769	-0.01325	-0.01463	-0.02026	-0.02054	-0.01599	-0.01008	-0.00699	-0.00202	0.00908	0.01829	0.0195	0.01519	0.00978	0.00446	-0.0033	-0.01411	-0.01849	-0.0113	-0.00765	-0.01181	-0.01446	-0.02041	-0.02734	-0.02875	-0.02396	-0.00952	0.0022
0.07998	0.0088	0.01509	0.0074	-0.00552	-0.00963	-0.01138	-0.01897	-0.02466	-0.02438	-0.02249	-0.01957	-0.01499	-0.01329	-0.01517	-0.01757	-0.0172	-0.01131	-0.00379	-0.00171	-0.00743	-0.016	-0.01751	-0.01307	-0.01445	-0.0201	-0.02046	-0.01599	-0.0101	-0.00697	-0.00203	0.00899	0.01809	0.0192	0.01486	0.00945	0.00414	-0.00366	-0.01458	-0.01901	-0.01175	-0.00805	-0.01211	-0.01468	-0.0207	-0.02758	-0.02885	-0.02398	-0.00953	0.00226
0.08016	0.00869	0.01478	0.00691	-0.00605	-0.01011	-0.01183	-0.01938	-0.02507	-0.02473	-0.02277	-0.01985	-0.01527	-0.01344	-0.01515	-0.0174	-0.01685	-0.01084	-0.00335	-0.00142	-0.00729	-0.01587	-0.01734	-0.01289	-0.01428	-0.01995	-0.02038	-0.01599	-0.01012	-0.00696	-0.00204	0.00888	0.01788	0.01888	0.01452	0.00912	0.00381	-0.00401	-0.01504	-0.01951	-0.01219	-0.00845	-0.0124	-0.01489	-0.02098	-0.02781	-0.02894	-0.024	-0.00955	0.00231
0.08035	0.00858	0.01448	0.00642	-0.00658	-0.01059	-0.01227	-0.01979	-0.02546	-0.02509	-0.02306	-0.02015	-0.01557	-0.0136	-0.01514	-0.01723	-0.0165	-0.01036	-0.00292	-0.00113	-0.00715	-0.01574	-0.01717	-0.01271	-0.01411	-0.0198	-0.0203	-0.01599	-0.01014	-0.00696	-0.00206	0.00876	0.01766	0.01856	0.01417	0.00878	0.00349	-0.00436	-0.0155	-0.02	-0.01263	-0.00885	-0.01267	-0.01508	-0.02124	-0.02803	-0.02903	-0.02401	-0.00956	0.00235
0.08053	0.00847	0.01417	0.00594	-0.0071	-0.01107	-0.01271	-0.02019	-0.02586	-0.02544	-0.02334	-0.02045	-0.01588	-0.01377	-0.01514	-0.01706	-0.01614	-0.00988	-0.00248	-0.000855658	-0.00701	-0.01562	-0.017	-0.01254	-0.01393	-0.01964	-0.02023	-0.016	-0.01017	-0.00696	-0.00209	0.00863	0.01743	0.01823	0.01381	0.00844	0.00317	-0.00471	-0.01594	-0.02049	-0.01306	-0.00923	-0.01294	-0.01527	-0.02149	-0.02824	-0.02911	-0.02402	-0.00959	0.00239
0.08072	0.00837	0.01388	0.00546	-0.00761	-0.01154	-0.01314	-0.02059	-0.02625	-0.02579	-0.02363	-0.02076	-0.01619	-0.01395	-0.01514	-0.01689	-0.01578	-0.00941	-0.00205	-0.000583891	-0.00688	-0.0155	-0.01683	-0.01237	-0.01376	-0.01949	-0.02015	-0.01601	-0.01021	-0.00697	-0.00213	0.00849	0.01718	0.01788	0.01344	0.0081	0.00284	-0.00506	-0.01638	-0.02096	-0.01349	-0.00961	-0.01319	-0.01544	-0.02173	-0.02845	-0.02918	-0.02403	-0.00961	0.00241
0.0809	0.00827	0.01359	0.00499	-0.00812	-0.012	-0.01357	-0.02098	-0.02664	-0.02614	-0.02392	-0.02108	-0.01651	-0.01414	-0.01515	-0.01672	-0.01542	-0.00894	-0.00163	-0.000318079	-0.00676	-0.01538	-0.01667	-0.0122	-0.0136	-0.01934	-0.02008	-0.01602	-0.01025	-0.00698	-0.00218	0.00833	0.01692	0.01753	0.01307	0.00776	0.00252	-0.00539	-0.01681	-0.02143	-0.0139	-0.00998	-0.01344	-0.0156	-0.02196	-0.02864	-0.02925	-0.02403	-0.00964	0.00243
0.08109	0.00817	0.0133	0.00452	-0.00862	-0.01246	-0.01399	-0.02137	-0.02702	-0.02649	-0.02421	-0.0214	-0.01685	-0.01433	-0.01515	-0.01655	-0.01506	-0.00846	-0.00121	-5.82677e-05	-0.00664	-0.01526	-0.01651	-0.01203	-0.01343	-0.01919	-0.02	-0.01603	-0.01029	-0.007	-0.00224	0.00816	0.01665	0.01717	0.0127	0.00742	0.0022	-0.00573	-0.01724	-0.02188	-0.01431	-0.01034	-0.01367	-0.01575	-0.02218	-0.02882	-0.02931	-0.02403	-0.00967	0.00244
0.08127	0.00807	0.01302	0.00407	-0.00911	-0.01291	-0.01441	-0.02175	-0.0274	-0.02684	-0.0245	-0.02172	-0.01719	-0.01453	-0.01517	-0.01638	-0.0147	-0.00799	-0.000791871	0.000195496	-0.00652	-0.01514	-0.01634	-0.01187	-0.01326	-0.01904	-0.01993	-0.01605	-0.01034	-0.00703	-0.00231	0.00798	0.01637	0.01679	0.01231	0.00707	0.00189	-0.00606	-0.01765	-0.02233	-0.01471	-0.0107	-0.0139	-0.01589	-0.02238	-0.02899	-0.02936	-0.02403	-0.0097	0.00244
0.08146	0.00797	0.01275	0.00361	-0.0096	-0.01336	-0.01482	-0.02212	-0.02778	-0.02719	-0.02479	-0.02205	-0.01754	-0.01474	-0.01519	-0.01621	-0.01433	-0.00752	-0.000379421	0.000443166	-0.00641	-0.01502	-0.01618	-0.0117	-0.0131	-0.01889	-0.01986	-0.01607	-0.01039	-0.00706	-0.00239	0.00779	0.01608	0.01641	0.01193	0.00672	0.00157	-0.00638	-0.01805	-0.02276	-0.01511	-0.01105	-0.01411	-0.01601	-0.02257	-0.02915	-0.02941	-0.02402	-0.00974	0.00243
0.08164	0.00788	0.01248	0.00317	-0.01008	-0.01379	-0.01522	-0.02249	-0.02814	-0.02753	-0.02509	-0.02239	-0.0179	-0.01496	-0.01521	-0.01604	-0.01397	-0.00706	2.8481e-05	0.000684714	-0.0063	-0.01491	-0.01603	-0.01154	-0.01293	-0.01874	-0.01979	-0.0161	-0.01045	-0.0071	-0.00248	0.00758	0.01577	0.01602	0.01153	0.00637	0.00126	-0.0067	-0.01845	-0.02318	-0.0155	-0.01139	-0.01431	-0.01612	-0.02275	-0.0293	-0.02945	-0.02402	-0.00978	0.00242
0.08182	0.00779	0.01221	0.00273	-0.01055	-0.01422	-0.01561	-0.02284	-0.02851	-0.02788	-0.02539	-0.02274	-0.01827	-0.01519	-0.01524	-0.01588	-0.01361	-0.00659	0.000431751	0.000920173	-0.0062	-0.0148	-0.01587	-0.01138	-0.01277	-0.01859	-0.01973	-0.01613	-0.01051	-0.00715	-0.00258	0.00737	0.01546	0.01563	0.01113	0.00602	0.00095334	-0.00701	-0.01883	-0.02359	-0.01588	-0.01172	-0.01451	-0.01622	-0.02292	-0.02945	-0.02948	-0.024	-0.00982	0.00239
0.08201	0.0077	0.01195	0.0023	-0.01102	-0.01465	-0.01599	-0.02319	-0.02887	-0.02822	-0.02568	-0.02309	-0.01865	-0.01542	-0.01528	-0.01571	-0.01325	-0.00613	0.000830323	0.00115	-0.0061	-0.01468	-0.01571	-0.01123	-0.01261	-0.01844	-0.01966	-0.01616	-0.01057	-0.0072	-0.00268	0.00714	0.01513	0.01522	0.01073	0.00566	0.000648446	-0.00731	-0.01921	-0.02399	-0.01625	-0.01205	-0.01469	-0.01631	-0.02307	-0.02958	-0.0295	-0.02399	-0.00987	0.00236
0.08219	0.00762	0.0117	0.00188	-0.01147	-0.01506	-0.01637	-0.02354	-0.02922	-0.02856	-0.02598	-0.02345	-0.01904	-0.01567	-0.01532	-0.01555	-0.01288	-0.00567	0.00122	0.00137	-0.006	-0.01457	-0.01556	-0.01107	-0.01245	-0.01829	-0.0196	-0.01619	-0.01064	-0.00726	-0.0028	0.00691	0.01479	0.01481	0.01032	0.00531	0.000347019	-0.00761	-0.01957	-0.02438	-0.01661	-0.01237	-0.01486	-0.01638	-0.02322	-0.0297	-0.02952	-0.02397	-0.00992	0.00232
0.08238	0.00753	0.01145	0.00147	-0.01192	-0.01547	-0.01674	-0.02387	-0.02957	-0.02889	-0.02628	-0.02381	-0.01944	-0.01592	-0.01536	-0.01539	-0.01252	-0.00521	0.00161	0.00159	-0.00591	-0.01447	-0.01541	-0.01092	-0.01229	-0.01815	-0.01954	-0.01623	-0.01072	-0.00732	-0.00292	0.00666	0.01445	0.0144	0.00991	0.00496	4.92636e-05	-0.00791	-0.01993	-0.02476	-0.01697	-0.01268	-0.01501	-0.01644	-0.02335	-0.02981	-0.02954	-0.02395	-0.00997	0.00227
0.08256	0.00745	0.01121	0.00106	-0.01236	-0.01586	-0.01709	-0.02419	-0.02991	-0.02922	-0.02659	-0.02417	-0.01984	-0.01618	-0.01541	-0.01523	-0.01216	-0.00476	0.002	0.0018	-0.00582	-0.01436	-0.01526	-0.01076	-0.01213	-0.018	-0.01948	-0.01627	-0.0108	-0.00739	-0.00305	0.0064	0.01409	0.01397	0.00949	0.0046	-0.000244613	-0.00819	-0.02027	-0.02513	-0.01732	-0.01298	-0.01516	-0.01649	-0.02346	-0.02991	-0.02954	-0.02393	-0.01003	0.00221
0.08275	0.00738	0.01098	0.000664223	-0.0128	-0.01625	-0.01744	-0.02451	-0.03024	-0.02955	-0.02689	-0.02455	-0.02026	-0.01645	-0.01547	-0.01507	-0.0118	-0.00431	0.00238	0.00201	-0.00574	-0.01425	-0.01511	-0.01061	-0.01198	-0.01786	-0.01942	-0.01631	-0.01088	-0.00747	-0.00319	0.00614	0.01373	0.01354	0.00907	0.00425	-0.000534405	-0.00847	-0.0206	-0.02549	-0.01766	-0.01328	-0.0153	-0.01653	-0.02357	-0.03001	-0.02954	-0.0239	-0.01009	0.00214
0.08293	0.0073	0.01075	0.000274236	-0.01322	-0.01663	-0.01778	-0.02481	-0.03057	-0.02988	-0.02719	-0.02493	-0.02068	-0.01672	-0.01553	-0.01492	-0.01145	-0.00386	0.00275	0.00221	-0.00566	-0.01415	-0.01496	-0.01046	-0.01182	-0.01772	-0.01937	-0.01636	-0.01097	-0.00755	-0.00334	0.00586	0.01336	0.01311	0.00865	0.00389	-0.000819906	-0.00874	-0.02093	-0.02583	-0.01799	-0.01357	-0.01543	-0.01656	-0.02367	-0.03009	-0.02953	-0.02387	-0.01015	0.00206
0.08312	0.00723	0.01053	-0.000107326	-0.01363	-0.017	-0.01811	-0.02511	-0.03089	-0.0302	-0.02749	-0.02531	-0.02111	-0.01701	-0.0156	-0.01477	-0.01109	-0.00342	0.00312	0.0024	-0.00559	-0.01405	-0.01481	-0.01032	-0.01167	-0.01758	-0.01932	-0.01641	-0.01106	-0.00764	-0.00349	0.00558	0.01298	0.01267	0.00822	0.00354	-0.0011	-0.00901	-0.02124	-0.02616	-0.01832	-0.01385	-0.01555	-0.01657	-0.02375	-0.03016	-0.02952	-0.02384	-0.01022	0.00197
0.0833	0.00716	0.01031	-0.000480284	-0.01404	-0.01736	-0.01843	-0.0254	-0.0312	-0.03052	-0.0278	-0.0257	-0.02155	-0.0173	-0.01567	-0.01462	-0.01074	-0.00298	0.00348	0.00259	-0.00551	-0.01395	-0.01466	-0.01017	-0.01151	-0.01744	-0.01927	-0.01647	-0.01116	-0.00773	-0.00366	0.00528	0.01259	0.01222	0.0078	0.00319	-0.00138	-0.00926	-0.02154	-0.02648	-0.01864	-0.01412	-0.01565	-0.01657	-0.02382	-0.03023	-0.0295	-0.0238	-0.01029	0.00187
0.08349	0.0071	0.0101	-0.00084446	-0.01444	-0.01771	-0.01873	-0.02567	-0.03151	-0.03084	-0.0281	-0.02609	-0.022	-0.0176	-0.01575	-0.01447	-0.01039	-0.00254	0.00384	0.00277	-0.00545	-0.01385	-0.01452	-0.01003	-0.01136	-0.0173	-0.01922	-0.01653	-0.01126	-0.00783	-0.00383	0.00498	0.0122	0.01177	0.00737	0.00284	-0.00165	-0.00951	-0.02183	-0.02679	-0.01895	-0.01439	-0.01575	-0.01657	-0.02388	-0.03028	-0.02948	-0.02377	-0.01037	0.00177
0.08367	0.00703	0.0099	-0.0012	-0.01482	-0.01805	-0.01903	-0.02594	-0.03181	-0.03115	-0.0284	-0.02649	-0.02245	-0.01791	-0.01584	-0.01433	-0.01004	-0.00211	0.00419	0.00295	-0.00538	-0.01375	-0.01438	-0.00988	-0.01121	-0.01716	-0.01917	-0.01659	-0.01137	-0.00794	-0.004	0.00468	0.0118	0.01132	0.00694	0.00249	-0.00191	-0.00975	-0.02211	-0.02709	-0.01925	-0.01465	-0.01584	-0.01655	-0.02393	-0.03033	-0.02944	-0.02373	-0.01044	0.00165
0.08386	0.00697	0.0097	-0.00155	-0.0152	-0.01838	-0.01932	-0.02619	-0.0321	-0.03146	-0.02871	-0.02689	-0.02291	-0.01823	-0.01593	-0.01419	-0.00969	-0.00169	0.00454	0.00312	-0.00532	-0.01365	-0.01423	-0.00974	-0.01106	-0.01703	-0.01913	-0.01666	-0.01148	-0.00805	-0.00419	0.00436	0.01139	0.01086	0.0065	0.00214	-0.00218	-0.00999	-0.02237	-0.02738	-0.01955	-0.0149	-0.01592	-0.01652	-0.02397	-0.03037	-0.02941	-0.02368	-0.01052	0.00152
0.08404	0.00691	0.00951	-0.00188	-0.01557	-0.0187	-0.01959	-0.02644	-0.03238	-0.03176	-0.02901	-0.0273	-0.02339	-0.01855	-0.01603	-0.01405	-0.00935	-0.00126	0.00489	0.00329	-0.00527	-0.01356	-0.01409	-0.0096	-0.01091	-0.0169	-0.01909	-0.01673	-0.0116	-0.00816	-0.00438	0.00404	0.01098	0.0104	0.00607	0.00179	-0.00243	-0.01021	-0.02263	-0.02765	-0.01983	-0.01514	-0.01598	-0.01647	-0.024	-0.0304	-0.02936	-0.02364	-0.01061	0.00139
0.08423	0.00686	0.00933	-0.00221	-0.01592	-0.01901	-0.01985	-0.02667	-0.03266	-0.03206	-0.02932	-0.02771	-0.02386	-0.01888	-0.01614	-0.01392	-0.00901	-0.000845805	0.00522	0.00345	-0.00521	-0.01346	-0.01395	-0.00946	-0.01076	-0.01676	-0.01905	-0.0168	-0.01172	-0.00829	-0.00458	0.00371	0.01056	0.00994	0.00564	0.00145	-0.00268	-0.01043	-0.02287	-0.02791	-0.02011	-0.01538	-0.01604	-0.01642	-0.02401	-0.03042	-0.02931	-0.02359	-0.0107	0.00124
0.08441	0.00681	0.00915	-0.00253	-0.01627	-0.0193	-0.0201	-0.0269	-0.03292	-0.03236	-0.02962	-0.02813	-0.02435	-0.01923	-0.01625	-0.01379	-0.00867	-0.000432534	0.00555	0.00361	-0.00516	-0.01337	-0.01381	-0.00932	-0.01062	-0.01663	-0.01902	-0.01688	-0.01185	-0.00841	-0.00478	0.00337	0.01014	0.00947	0.0052	0.00111	-0.00293	-0.01064	-0.02311	-0.02817	-0.02039	-0.01561	-0.01609	-0.01636	-0.02402	-0.03043	-0.02926	-0.02354	-0.01079	0.00109
0.0846	0.00676	0.00899	-0.00284	-0.01661	-0.01959	-0.02034	-0.02711	-0.03318	-0.03265	-0.02992	-0.02855	-0.02484	-0.01957	-0.01636	-0.01367	-0.00833	-2.39754e-05	0.00588	0.00376	-0.00511	-0.01328	-0.01367	-0.00919	-0.01047	-0.01651	-0.01899	-0.01696	-0.01198	-0.00855	-0.00499	0.00303	0.00971	0.00901	0.00477	0.000764893	-0.00317	-0.01084	-0.02333	-0.02841	-0.02065	-0.01583	-0.01613	-0.01629	-0.02402	-0.03043	-0.0292	-0.02349	-0.01089	0.000927923
0.08478	0.00671	0.00882	-0.00314	-0.01693	-0.01987	-0.02057	-0.02731	-0.03343	-0.03293	-0.03022	-0.02897	-0.02535	-0.01993	-0.01649	-0.01354	-0.008	0.000379775	0.0062	0.0039	-0.00507	-0.01319	-0.01353	-0.00905	-0.01033	-0.01638	-0.01896	-0.01705	-0.01211	-0.00869	-0.00521	0.00268	0.00928	0.00854	0.00433	0.000427029	-0.0034	-0.01104	-0.02354	-0.02864	-0.02091	-0.01605	-0.01616	-0.01621	-0.024	-0.03042	-0.02913	-0.02344	-0.01099	0.000755906
0.08496	0.00667	0.00867	-0.00342	-0.01725	-0.02013	-0.02078	-0.0275	-0.03367	-0.03322	-0.03052	-0.0294	-0.02585	-0.0203	-0.01662	-0.01343	-0.00767	0.000778619	0.00652	0.00405	-0.00503	-0.0131	-0.0134	-0.00892	-0.01019	-0.01626	-0.01893	-0.01714	-0.01225	-0.00883	-0.00543	0.00232	0.00884	0.00807	0.0039	9.19051e-05	-0.00363	-0.01122	-0.02374	-0.02885	-0.02116	-0.01626	-0.01619	-0.01612	-0.02398	-0.03041	-0.02906	-0.02339	-0.01109	0.000574821
0.08515	0.00663	0.00852	-0.0037	-0.01756	-0.02039	-0.02099	-0.02768	-0.03391	-0.03349	-0.03082	-0.02983	-0.02637	-0.02067	-0.01676	-0.01331	-0.00735	0.00117	0.00683	0.00418	-0.00499	-0.01301	-0.01326	-0.00878	-0.01004	-0.01614	-0.01891	-0.01723	-0.01239	-0.00898	-0.00566	0.00196	0.00841	0.00761	0.00347	-0.000240273	-0.00385	-0.0114	-0.02393	-0.02906	-0.0214	-0.01646	-0.0162	-0.01602	-0.02395	-0.03039	-0.02898	-0.02333	-0.0112	0.000384727
0.08533	0.00659	0.00838	-0.00397	-0.01785	-0.02063	-0.02118	-0.02784	-0.03413	-0.03376	-0.03112	-0.03026	-0.02689	-0.02105	-0.0169	-0.0132	-0.00703	0.00156	0.00713	0.00431	-0.00495	-0.01293	-0.01313	-0.00865	-0.00991	-0.01602	-0.01889	-0.01733	-0.01254	-0.00913	-0.00589	0.0016	0.00796	0.00714	0.00304	-0.000569299	-0.00407	-0.01157	-0.02411	-0.02926	-0.02164	-0.01666	-0.01621	-0.01591	-0.02391	-0.03036	-0.0289	-0.02327	-0.01131	0.000185684
0.08552	0.00656	0.00825	-0.00423	-0.01814	-0.02086	-0.02136	-0.028	-0.03435	-0.03403	-0.03142	-0.0307	-0.02742	-0.02144	-0.01705	-0.0131	-0.00671	0.00194	0.00743	0.00444	-0.00492	-0.01284	-0.01299	-0.00852	-0.00977	-0.0159	-0.01887	-0.01743	-0.01269	-0.00929	-0.00613	0.00123	0.00752	0.00667	0.00261	-0.00089497	-0.00428	-0.01173	-0.02428	-0.02944	-0.02187	-0.01685	-0.0162	-0.01579	-0.02385	-0.03032	-0.02881	-0.02321	-0.01142	-2.22498e-05
0.0857	0.00653	0.00813	-0.00448	-0.01841	-0.02108	-0.02152	-0.02814	-0.03455	-0.03429	-0.03172	-0.03114	-0.02795	-0.02184	-0.01721	-0.013	-0.00639	0.00232	0.00773	0.00457	-0.00488	-0.01275	-0.01286	-0.00839	-0.00963	-0.01578	-0.01885	-0.01753	-0.01285	-0.00946	-0.00638	0.00085661	0.00707	0.0062	0.00218	-0.00122	-0.00448	-0.01189	-0.02443	-0.02962	-0.02209	-0.01704	-0.01619	-0.01566	-0.02379	-0.03027	-0.02871	-0.02315	-0.01153	-0.000238996
0.08589	0.0065	0.00801	-0.00472	-0.01868	-0.02129	-0.02168	-0.02827	-0.03475	-0.03454	-0.03201	-0.03158	-0.02849	-0.02224	-0.01737	-0.0129	-0.00609	0.0027	0.00802	0.00468	-0.00486	-0.01267	-0.01272	-0.00826	-0.00949	-0.01567	-0.01884	-0.01764	-0.01301	-0.00963	-0.00663	0.000479939	0.00662	0.00574	0.00176	-0.00154	-0.00468	-0.01203	-0.02458	-0.02978	-0.02231	-0.01722	-0.01618	-0.01553	-0.02373	-0.03022	-0.02862	-0.02308	-0.01165	-0.000464405
0.08607	0.00648	0.0079	-0.00495	-0.01893	-0.02149	-0.02182	-0.02839	-0.03494	-0.03479	-0.03231	-0.03203	-0.02904	-0.02265	-0.01754	-0.01281	-0.00578	0.00306	0.0083	0.0048	-0.00483	-0.01258	-0.01259	-0.00813	-0.00936	-0.01556	-0.01883	-0.01775	-0.01318	-0.0098	-0.00688	9.97965e-05	0.00618	0.00527	0.00133	-0.00185	-0.00487	-0.01217	-0.02472	-0.02993	-0.02252	-0.01739	-0.01615	-0.01539	-0.02365	-0.03016	-0.02851	-0.02302	-0.01178	-0.000698307
0.08626	0.00645	0.0078	-0.00516	-0.01917	-0.02168	-0.02195	-0.0285	-0.03512	-0.03504	-0.0326	-0.03247	-0.02959	-0.02307	-0.01772	-0.01272	-0.00548	0.00343	0.00858	0.00491	-0.0048	-0.0125	-0.01246	-0.008	-0.00923	-0.01545	-0.01882	-0.01786	-0.01335	-0.00998	-0.00714	-0.000283499	0.00573	0.00481	0.000915608	-0.00216	-0.00506	-0.0123	-0.02484	-0.03008	-0.02272	-0.01755	-0.01612	-0.01524	-0.02356	-0.03009	-0.02841	-0.02295	-0.0119	-0.000940535
0.08644	0.00644	0.00771	-0.00537	-0.0194	-0.02186	-0.02206	-0.0286	-0.03529	-0.03528	-0.03289	-0.03292	-0.03015	-0.0235	-0.01791	-0.01264	-0.00518	0.00378	0.00885	0.00502	-0.00478	-0.01242	-0.01233	-0.00787	-0.0091	-0.01535	-0.01882	-0.01798	-0.01352	-0.01017	-0.0074	-0.000669629	0.00528	0.00435	0.000500455	-0.00247	-0.00524	-0.01242	-0.02496	-0.03021	-0.02292	-0.01771	-0.01608	-0.01509	-0.02347	-0.03002	-0.02829	-0.02288	-0.01203	-0.00119
0.08663	0.00642	0.00762	-0.00556	-0.01962	-0.02202	-0.02217	-0.02868	-0.03545	-0.03551	-0.03318	-0.03337	-0.03071	-0.02393	-0.0181	-0.01256	-0.00489	0.00413	0.00912	0.00512	-0.00476	-0.01234	-0.01219	-0.00774	-0.00897	-0.01524	-0.01882	-0.0181	-0.0137	-0.01036	-0.00767	-0.00106	0.00482	0.00389	8.90151e-05	-0.00277	-0.00541	-0.01254	-0.02506	-0.03033	-0.0231	-0.01787	-0.01604	-0.01492	-0.02337	-0.02994	-0.02818	-0.02282	-0.01217	-0.00145
0.08681	0.00641	0.00755	-0.00575	-0.01983	-0.02217	-0.02226	-0.02876	-0.03561	-0.03574	-0.03346	-0.03383	-0.03128	-0.02437	-0.0183	-0.01248	-0.0046	0.00448	0.00938	0.00522	-0.00474	-0.01226	-0.01206	-0.00762	-0.00884	-0.01514	-0.01882	-0.01823	-0.01388	-0.01055	-0.00794	-0.00145	0.00437	0.00344	-0.000318399	-0.00307	-0.00558	-0.01265	-0.02516	-0.03045	-0.02329	-0.01802	-0.01599	-0.01476	-0.02326	-0.02985	-0.02806	-0.02275	-0.0123	-0.00172
0.087	0.00641	0.00748	-0.00592	-0.02003	-0.02232	-0.02234	-0.02882	-0.03575	-0.03596	-0.03375	-0.03428	-0.03185	-0.02482	-0.0185	-0.01241	-0.00431	0.00482	0.00964	0.00531	-0.00472	-0.01218	-0.01193	-0.00749	-0.00871	-0.01504	-0.01883	-0.01835	-0.01406	-0.01075	-0.00822	-0.00184	0.00392	0.00299	-0.000721475	-0.00336	-0.00574	-0.01275	-0.02525	-0.03055	-0.02347	-0.01816	-0.01593	-0.01458	-0.02315	-0.02976	-0.02793	-0.02267	-0.01244	-0.00199
0.08718	0.0064	0.00742	-0.00608	-0.02022	-0.02245	-0.02241	-0.02887	-0.03589	-0.03618	-0.03403	-0.03474	-0.03243	-0.02528	-0.01872	-0.01235	-0.00403	0.00516	0.00989	0.00541	-0.0047	-0.0121	-0.0118	-0.00737	-0.00859	-0.01495	-0.01883	-0.01848	-0.01425	-0.01095	-0.00849	-0.00224	0.00348	0.00255	-0.00112	-0.00365	-0.0059	-0.01284	-0.02532	-0.03065	-0.02364	-0.0183	-0.01587	-0.0144	-0.02303	-0.02965	-0.0278	-0.0226	-0.01258	-0.00227
0.08737	0.0064	0.00737	-0.00624	-0.02039	-0.02257	-0.02247	-0.02891	-0.03602	-0.03639	-0.03431	-0.03519	-0.03301	-0.02574	-0.01893	-0.01229	-0.00376	0.00548	0.01014	0.0055	-0.00469	-0.01202	-0.01167	-0.00725	-0.00847	-0.01485	-0.01884	-0.01862	-0.01445	-0.01115	-0.00878	-0.00263	0.00303	0.0021	-0.00151	-0.00393	-0.00605	-0.01293	-0.02539	-0.03073	-0.0238	-0.01844	-0.0158	-0.01422	-0.0229	-0.02955	-0.02767	-0.02253	-0.01272	-0.00256
0.08755	0.00641	0.00732	-0.00638	-0.02056	-0.02268	-0.02251	-0.02894	-0.03613	-0.0366	-0.03458	-0.03565	-0.0336	-0.02621	-0.01916	-0.01223	-0.00349	0.00581	0.01038	0.00558	-0.00467	-0.01194	-0.01154	-0.00713	-0.00835	-0.01476	-0.01886	-0.01875	-0.01464	-0.01136	-0.00906	-0.00303	0.00258	0.00167	-0.0019	-0.00421	-0.00619	-0.013	-0.02545	-0.03081	-0.02396	-0.01856	-0.01573	-0.01403	-0.02277	-0.02943	-0.02753	-0.02246	-0.01287	-0.00286
0.08774	0.00641	0.00729	-0.00651	-0.02071	-0.02277	-0.02254	-0.02896	-0.03624	-0.0368	-0.03486	-0.03611	-0.03419	-0.02669	-0.01939	-0.01218	-0.00322	0.00613	0.01062	0.00566	-0.00466	-0.01186	-0.01141	-0.007	-0.00823	-0.01467	-0.01887	-0.01889	-0.01484	-0.01158	-0.00935	-0.00343	0.00214	0.00124	-0.00228	-0.00448	-0.00633	-0.01308	-0.0255	-0.03088	-0.02411	-0.01869	-0.01565	-0.01384	-0.02263	-0.02932	-0.02739	-0.02238	-0.01302	-0.00316
0.08792	0.00642	0.00726	-0.00662	-0.02085	-0.02286	-0.02256	-0.02896	-0.03635	-0.03699	-0.03513	-0.03657	-0.03478	-0.02717	-0.01963	-0.01214	-0.00295	0.00644	0.01085	0.00574	-0.00465	-0.01178	-0.01128	-0.00688	-0.00811	-0.01459	-0.01889	-0.01904	-0.01504	-0.0118	-0.00964	-0.00382	0.0017	0.000812406	-0.00266	-0.00475	-0.00646	-0.01314	-0.02554	-0.03094	-0.02426	-0.01881	-0.01557	-0.01364	-0.02249	-0.02919	-0.02725	-0.02231	-0.01317	-0.00347
0.0881	0.00644	0.00724	-0.00673	-0.02098	-0.02294	-0.02257	-0.02896	-0.03644	-0.03718	-0.0354	-0.03703	-0.03538	-0.02766	-0.01988	-0.01209	-0.0027	0.00675	0.01107	0.00582	-0.00464	-0.0117	-0.01116	-0.00676	-0.00799	-0.0145	-0.01891	-0.01918	-0.01525	-0.01202	-0.00993	-0.00422	0.00126	0.000392862	-0.00303	-0.00501	-0.00659	-0.0132	-0.02557	-0.03099	-0.0244	-0.01892	-0.01548	-0.01344	-0.02234	-0.02906	-0.0271	-0.02223	-0.01332	-0.00378
0.08829	0.00645	0.00723	-0.00682	-0.02111	-0.023	-0.02257	-0.02895	-0.03652	-0.03737	-0.03567	-0.03749	-0.03598	-0.02815	-0.02013	-0.01206	-0.00244	0.00705	0.01129	0.00589	-0.00462	-0.01162	-0.01103	-0.00664	-0.00788	-0.01442	-0.01894	-0.01933	-0.01546	-0.01224	-0.01023	-0.00462	0.000826402	-2.05508e-05	-0.0034	-0.00527	-0.00671	-0.01325	-0.02559	-0.03103	-0.02454	-0.01903	-0.01539	-0.01323	-0.02218	-0.02893	-0.02695	-0.02215	-0.01348	-0.00411
0.08847	0.00648	0.00723	-0.00691	-0.02122	-0.02306	-0.02256	-0.02892	-0.0366	-0.03755	-0.03593	-0.03795	-0.03658	-0.02866	-0.02039	-0.01202	-0.00219	0.00735	0.01151	0.00596	-0.00461	-0.01154	-0.0109	-0.00653	-0.00777	-0.01435	-0.01896	-0.01948	-0.01567	-0.01247	-0.01053	-0.00501	0.000395087	-0.000427537	-0.00375	-0.00552	-0.00682	-0.01329	-0.02561	-0.03107	-0.02467	-0.01913	-0.0153	-0.01303	-0.02203	-0.02879	-0.02679	-0.02208	-0.01363	-0.00443
0.08866	0.0065	0.00724	-0.00698	-0.02131	-0.0231	-0.02254	-0.02889	-0.03667	-0.03772	-0.0362	-0.0384	-0.03719	-0.02916	-0.02066	-0.01199	-0.00195	0.00764	0.01172	0.00603	-0.0046	-0.01147	-0.01077	-0.00641	-0.00766	-0.01427	-0.01899	-0.01963	-0.01589	-0.01271	-0.01083	-0.00541	-3.24706e-05	-0.000827805	-0.00411	-0.00577	-0.00693	-0.01333	-0.02562	-0.0311	-0.0248	-0.01924	-0.0152	-0.01282	-0.02186	-0.02864	-0.02664	-0.022	-0.01379	-0.00477
0.08884	0.00653	0.00726	-0.00704	-0.0214	-0.02314	-0.0225	-0.02884	-0.03673	-0.03789	-0.03646	-0.03886	-0.0378	-0.02968	-0.02093	-0.01197	-0.0017	0.00792	0.01192	0.0061	-0.00459	-0.01139	-0.01064	-0.00629	-0.00755	-0.0142	-0.01902	-0.01979	-0.01611	-0.01294	-0.01113	-0.0058	-0.000455961	-0.00122	-0.00445	-0.00601	-0.00704	-0.01336	-0.02562	-0.03112	-0.02492	-0.01933	-0.0151	-0.01261	-0.0217	-0.02849	-0.02648	-0.02192	-0.01395	-0.00511
0.08903	0.00656	0.00728	-0.00709	-0.02148	-0.02316	-0.02246	-0.02879	-0.03679	-0.03806	-0.03671	-0.03932	-0.03841	-0.0302	-0.02121	-0.01195	-0.00147	0.0082	0.01212	0.00616	-0.00459	-0.01131	-0.01052	-0.00618	-0.00744	-0.01413	-0.01905	-0.01994	-0.01633	-0.01318	-0.01143	-0.0062	-0.000875072	-0.00161	-0.00479	-0.00624	-0.00713	-0.01339	-0.02561	-0.03113	-0.02504	-0.01942	-0.015	-0.01239	-0.02153	-0.02833	-0.02631	-0.02185	-0.01412	-0.00545
0.08921	0.0066	0.00732	-0.00712	-0.02154	-0.02318	-0.0224	-0.02873	-0.03683	-0.03822	-0.03697	-0.03978	-0.03902	-0.03072	-0.02149	-0.01193	-0.00123	0.00848	0.01232	0.00622	-0.00458	-0.01123	-0.01039	-0.00606	-0.00734	-0.01406	-0.01909	-0.0201	-0.01655	-0.01342	-0.01174	-0.00659	-0.00129	-0.00199	-0.00512	-0.00647	-0.00722	-0.01341	-0.0256	-0.03114	-0.02515	-0.01951	-0.0149	-0.01218	-0.02135	-0.02818	-0.02615	-0.02177	-0.01428	-0.0058
0.0894	0.00664	0.00736	-0.00715	-0.0216	-0.02318	-0.02234	-0.02865	-0.03687	-0.03837	-0.03722	-0.04024	-0.03964	-0.03125	-0.02178	-0.01192	-0.001	0.00875	0.01251	0.00628	-0.00457	-0.01116	-0.01026	-0.00595	-0.00723	-0.01399	-0.01913	-0.02026	-0.01677	-0.01367	-0.01204	-0.00698	-0.0017	-0.00236	-0.00544	-0.0067	-0.00731	-0.01342	-0.02557	-0.03114	-0.02526	-0.0196	-0.01479	-0.01197	-0.02118	-0.02801	-0.02598	-0.02169	-0.01445	-0.00616
0.08958	0.00669	0.00741	-0.00716	-0.02164	-0.02318	-0.02226	-0.02857	-0.0369	-0.03852	-0.03747	-0.0407	-0.04025	-0.03179	-0.02207	-0.01191	-0.000776595	0.00901	0.01269	0.00633	-0.00456	-0.01108	-0.01014	-0.00583	-0.00713	-0.01393	-0.01917	-0.02043	-0.017	-0.01391	-0.01235	-0.00737	-0.0021	-0.00272	-0.00576	-0.00691	-0.00739	-0.01343	-0.02554	-0.03113	-0.02536	-0.01968	-0.01468	-0.01175	-0.021	-0.02784	-0.02581	-0.02161	-0.01461	-0.00652
0.08977	0.00673	0.00747	-0.00716	-0.02167	-0.02316	-0.02218	-0.02848	-0.03693	-0.03867	-0.03772	-0.04115	-0.04087	-0.03233	-0.02237	-0.01191	-0.000554681	0.00927	0.01287	0.00639	-0.00455	-0.011	-0.01001	-0.00572	-0.00703	-0.01387	-0.01921	-0.02059	-0.01723	-0.01416	-0.01265	-0.00775	-0.0025	-0.00307	-0.00606	-0.00713	-0.00747	-0.01343	-0.02551	-0.03112	-0.02545	-0.01975	-0.01457	-0.01153	-0.02081	-0.02767	-0.02564	-0.02153	-0.01478	-0.00688
0.08995	0.00679	0.00754	-0.00715	-0.02169	-0.02314	-0.02209	-0.02838	-0.03695	-0.03881	-0.03797	-0.04161	-0.04149	-0.03287	-0.02268	-0.01191	-0.000336555	0.00952	0.01304	0.00644	-0.00454	-0.01093	-0.00989	-0.00561	-0.00693	-0.01381	-0.01926	-0.02076	-0.01746	-0.01442	-0.01296	-0.00813	-0.00289	-0.00342	-0.00636	-0.00733	-0.00754	-0.01343	-0.02547	-0.0311	-0.02555	-0.01983	-0.01446	-0.01132	-0.02063	-0.0275	-0.02546	-0.02145	-0.01495	-0.00725
0.09014	0.00684	0.00763	-0.00713	-0.0217	-0.0231	-0.02198	-0.02827	-0.03696	-0.03895	-0.03821	-0.04206	-0.04212	-0.03342	-0.02299	-0.01191	-0.000122105	0.00977	0.01321	0.00648	-0.00453	-0.01085	-0.00976	-0.0055	-0.00684	-0.01375	-0.0193	-0.02092	-0.0177	-0.01467	-0.01327	-0.00851	-0.00328	-0.00375	-0.00665	-0.00753	-0.0076	-0.01342	-0.02542	-0.03108	-0.02563	-0.0199	-0.01434	-0.0111	-0.02044	-0.02732	-0.02529	-0.02137	-0.01512	-0.00762
0.09032	0.0069	0.00771	-0.0071	-0.0217	-0.02306	-0.02187	-0.02816	-0.03696	-0.03908	-0.03845	-0.04252	-0.04274	-0.03398	-0.02331	-0.01191	8.8781e-05	0.01001	0.01337	0.00653	-0.00453	-0.01077	-0.00964	-0.00539	-0.00674	-0.0137	-0.01935	-0.02109	-0.01793	-0.01493	-0.01358	-0.00889	-0.00366	-0.00408	-0.00693	-0.00773	-0.00766	-0.01341	-0.02537	-0.03105	-0.02572	-0.01996	-0.01423	-0.01089	-0.02026	-0.02714	-0.02511	-0.02129	-0.01529	-0.00799
0.09051	0.00697	0.00781	-0.00705	-0.02169	-0.02301	-0.02175	-0.02803	-0.03696	-0.03921	-0.03869	-0.04297	-0.04336	-0.03454	-0.02363	-0.01192	0.000296216	0.01025	0.01353	0.00657	-0.00452	-0.0107	-0.00952	-0.00528	-0.00665	-0.01365	-0.0194	-0.02126	-0.01817	-0.01518	-0.01389	-0.00926	-0.00403	-0.0044	-0.00721	-0.00791	-0.00772	-0.01339	-0.02531	-0.03101	-0.0258	-0.02003	-0.01412	-0.01068	-0.02007	-0.02695	-0.02493	-0.02122	-0.01546	-0.00837
0.09069	0.00703	0.00792	-0.00699	-0.02167	-0.02294	-0.02162	-0.0279	-0.03696	-0.03933	-0.03893	-0.04342	-0.04398	-0.0351	-0.02396	-0.01194	0.000500313	0.01048	0.01368	0.00662	-0.00451	-0.01062	-0.0094	-0.00517	-0.00656	-0.0136	-0.01946	-0.02144	-0.01841	-0.01544	-0.01419	-0.00963	-0.0044	-0.00471	-0.00747	-0.0081	-0.00777	-0.01337	-0.02524	-0.03097	-0.02587	-0.02009	-0.014	-0.01046	-0.01988	-0.02676	-0.02474	-0.02114	-0.01564	-0.00875
0.09088	0.00711	0.00804	-0.00692	-0.02164	-0.02287	-0.02149	-0.02776	-0.03694	-0.03945	-0.03916	-0.04387	-0.04461	-0.03566	-0.02429	-0.01195	0.000701184	0.01071	0.01383	0.00666	-0.0045	-0.01054	-0.00927	-0.00506	-0.00647	-0.01355	-0.01951	-0.02161	-0.01865	-0.01571	-0.0145	-0.01	-0.00476	-0.00501	-0.00773	-0.00827	-0.00782	-0.01334	-0.02517	-0.03092	-0.02594	-0.02014	-0.01388	-0.01025	-0.01968	-0.02657	-0.02456	-0.02106	-0.01581	-0.00913
0.09106	0.00718	0.00816	-0.00684	-0.0216	-0.0228	-0.02134	-0.02762	-0.03692	-0.03957	-0.03939	-0.04432	-0.04523	-0.03623	-0.02463	-0.01197	0.000898941	0.01093	0.01398	0.00669	-0.00448	-0.01047	-0.00915	-0.00496	-0.00638	-0.0135	-0.01957	-0.02178	-0.01889	-0.01597	-0.01481	-0.01036	-0.00511	-0.0053	-0.00798	-0.00844	-0.00786	-0.0133	-0.02509	-0.03087	-0.02601	-0.0202	-0.01377	-0.01004	-0.01949	-0.02638	-0.02438	-0.02098	-0.01598	-0.00952
0.09124	0.00726	0.0083	-0.00675	-0.02154	-0.02271	-0.02119	-0.02746	-0.0369	-0.03969	-0.03962	-0.04476	-0.04585	-0.03681	-0.02496	-0.01199	0.00109	0.01115	0.01411	0.00673	-0.00447	-0.01039	-0.00903	-0.00485	-0.00629	-0.01346	-0.01962	-0.02196	-0.01913	-0.01623	-0.01511	-0.01071	-0.00546	-0.00558	-0.00822	-0.00861	-0.00789	-0.01327	-0.02501	-0.03081	-0.02607	-0.02025	-0.01365	-0.00984	-0.0193	-0.02618	-0.02419	-0.0209	-0.01615	-0.00991
0.09143	0.00735	0.00844	-0.00664	-0.02148	-0.02261	-0.02103	-0.02731	-0.03687	-0.0398	-0.03985	-0.04521	-0.04648	-0.03738	-0.02531	-0.01201	0.00129	0.01137	0.01425	0.00677	-0.00446	-0.01031	-0.00892	-0.00475	-0.00621	-0.01342	-0.01968	-0.02213	-0.01937	-0.0165	-0.01542	-0.01107	-0.0058	-0.00584	-0.00845	-0.00877	-0.00793	-0.01323	-0.02492	-0.03074	-0.02612	-0.02029	-0.01354	-0.00963	-0.0191	-0.02598	-0.024	-0.02082	-0.01633	-0.0103
0.09161	0.00743	0.0086	-0.00653	-0.02141	-0.02251	-0.02087	-0.02714	-0.03684	-0.03991	-0.04008	-0.04565	-0.0471	-0.03796	-0.02566	-0.01204	0.00147	0.01158	0.01437	0.0068	-0.00445	-0.01024	-0.0088	-0.00464	-0.00613	-0.01337	-0.01974	-0.02231	-0.01961	-0.01677	-0.01572	-0.01141	-0.00613	-0.0061	-0.00867	-0.00892	-0.00795	-0.01318	-0.02483	-0.03067	-0.02618	-0.02034	-0.01342	-0.00943	-0.01891	-0.02578	-0.02381	-0.02074	-0.0165	-0.01069
0.0918	0.00753	0.00876	-0.0064	-0.02132	-0.0224	-0.0207	-0.02697	-0.0368	-0.04001	-0.0403	-0.04609	-0.04772	-0.03854	-0.02601	-0.01206	0.00166	0.01178	0.0145	0.00683	-0.00443	-0.01016	-0.00868	-0.00454	-0.00604	-0.01334	-0.0198	-0.02248	-0.01986	-0.01703	-0.01603	-0.01176	-0.00645	-0.00635	-0.00889	-0.00907	-0.00798	-0.01313	-0.02473	-0.0306	-0.02622	-0.02038	-0.01331	-0.00923	-0.01871	-0.02557	-0.02362	-0.02067	-0.01667	-0.01108
0.09198	0.00762	0.00893	-0.00626	-0.02123	-0.02228	-0.02052	-0.02679	-0.03675	-0.04011	-0.04052	-0.04653	-0.04834	-0.03913	-0.02636	-0.01209	0.00184	0.01198	0.01461	0.00686	-0.00442	-0.01009	-0.00857	-0.00444	-0.00596	-0.0133	-0.01987	-0.02266	-0.0201	-0.0173	-0.01633	-0.01209	-0.00676	-0.00659	-0.00909	-0.00921	-0.008	-0.01308	-0.02463	-0.03052	-0.02627	-0.02041	-0.01319	-0.00903	-0.01852	-0.02537	-0.02343	-0.02059	-0.01684	-0.01147
0.09217	0.00772	0.00912	-0.00611	-0.02113	-0.02216	-0.02033	-0.02661	-0.03671	-0.04021	-0.04074	-0.04696	-0.04896	-0.03971	-0.02672	-0.01213	0.00203	0.01218	0.01473	0.00689	-0.0044	-0.01001	-0.00845	-0.00434	-0.00588	-0.01326	-0.01993	-0.02284	-0.02034	-0.01757	-0.01663	-0.01242	-0.00706	-0.00682	-0.00929	-0.00934	-0.00802	-0.01302	-0.02452	-0.03044	-0.02631	-0.02045	-0.01308	-0.00884	-0.01833	-0.02516	-0.02324	-0.02051	-0.01701	-0.01187
0.09235	0.00783	0.00931	-0.00595	-0.02101	-0.02202	-0.02014	-0.02642	-0.03665	-0.04031	-0.04096	-0.0474	-0.04958	-0.0403	-0.02708	-0.01216	0.00221	0.01237	0.01483	0.00691	-0.00438	-0.00993	-0.00834	-0.00424	-0.0058	-0.01323	-0.02	-0.02301	-0.02058	-0.01784	-0.01692	-0.01275	-0.00736	-0.00703	-0.00947	-0.00947	-0.00803	-0.01296	-0.02441	-0.03035	-0.02634	-0.02048	-0.01297	-0.00865	-0.01813	-0.02495	-0.02305	-0.02044	-0.01718	-0.01226
0.09254	0.00794	0.00951	-0.00577	-0.02089	-0.02188	-0.01994	-0.02623	-0.0366	-0.0404	-0.04118	-0.04783	-0.05019	-0.04089	-0.02744	-0.01219	0.00238	0.01256	0.01494	0.00694	-0.00436	-0.00986	-0.00823	-0.00414	-0.00572	-0.01319	-0.02007	-0.02319	-0.02083	-0.01811	-0.01722	-0.01307	-0.00765	-0.00724	-0.00965	-0.0096	-0.00804	-0.0129	-0.0243	-0.03026	-0.02638	-0.02051	-0.01286	-0.00847	-0.01794	-0.02474	-0.02286	-0.02036	-0.01735	-0.01266
0.09272	0.00805	0.00972	-0.00559	-0.02075	-0.02173	-0.01974	-0.02604	-0.03654	-0.04049	-0.04139	-0.04826	-0.05081	-0.04148	-0.0278	-0.01223	0.00256	0.01274	0.01503	0.00696	-0.00434	-0.00978	-0.00812	-0.00404	-0.00565	-0.01316	-0.02013	-0.02337	-0.02107	-0.01837	-0.01751	-0.01338	-0.00792	-0.00744	-0.00982	-0.00972	-0.00804	-0.01283	-0.02418	-0.03016	-0.0264	-0.02054	-0.01275	-0.00828	-0.01775	-0.02453	-0.02267	-0.02028	-0.01752	-0.01305
0.09291	0.00816	0.00993	-0.00539	-0.02061	-0.02158	-0.01954	-0.02583	-0.03647	-0.04058	-0.0416	-0.04868	-0.05142	-0.04207	-0.02817	-0.01226	0.00273	0.01292	0.01513	0.00699	-0.00432	-0.00971	-0.00801	-0.00394	-0.00557	-0.01313	-0.0202	-0.02354	-0.02131	-0.01864	-0.0178	-0.01369	-0.00819	-0.00762	-0.00998	-0.00983	-0.00805	-0.01276	-0.02406	-0.03006	-0.02643	-0.02056	-0.01264	-0.0081	-0.01755	-0.02431	-0.02247	-0.02021	-0.01769	-0.01345
0.09309	0.00828	0.01016	-0.00518	-0.02046	-0.02142	-0.01932	-0.02563	-0.0364	-0.04066	-0.04181	-0.04911	-0.05203	-0.04266	-0.02854	-0.0123	0.0029	0.01309	0.01522	0.00701	-0.00429	-0.00963	-0.0079	-0.00385	-0.00549	-0.0131	-0.02027	-0.02372	-0.02155	-0.01891	-0.01809	-0.014	-0.00845	-0.00779	-0.01013	-0.00994	-0.00805	-0.01269	-0.02393	-0.02996	-0.02644	-0.02058	-0.01253	-0.00793	-0.01736	-0.0241	-0.02228	-0.02013	-0.01785	-0.01384
0.09328	0.00841	0.0104	-0.00496	-0.02029	-0.02125	-0.01911	-0.02542	-0.03633	-0.04075	-0.04202	-0.04953	-0.05263	-0.04325	-0.02891	-0.01234	0.00307	0.01326	0.0153	0.00703	-0.00427	-0.00956	-0.0078	-0.00375	-0.00542	-0.01307	-0.02034	-0.02389	-0.02179	-0.01918	-0.01837	-0.01429	-0.0087	-0.00795	-0.01027	-0.01004	-0.00804	-0.01261	-0.02381	-0.02985	-0.02646	-0.0206	-0.01243	-0.00776	-0.01717	-0.02388	-0.02209	-0.02006	-0.01802	-0.01424
0.09346	0.00854	0.01064	-0.00473	-0.02012	-0.02107	-0.01889	-0.02521	-0.03626	-0.04083	-0.04223	-0.04995	-0.05323	-0.04384	-0.02928	-0.01238	0.00324	0.01343	0.01538	0.00705	-0.00424	-0.00948	-0.0077	-0.00366	-0.00534	-0.01304	-0.02041	-0.02407	-0.02202	-0.01945	-0.01866	-0.01458	-0.00894	-0.0081	-0.0104	-0.01014	-0.00804	-0.01253	-0.02367	-0.02973	-0.02647	-0.02062	-0.01233	-0.00759	-0.01698	-0.02366	-0.0219	-0.01998	-0.01818	-0.01463
0.09365	0.00867	0.01089	-0.00449	-0.01994	-0.02089	-0.01866	-0.02499	-0.03618	-0.04091	-0.04244	-0.05036	-0.05383	-0.04443	-0.02965	-0.01242	0.00341	0.0136	0.01546	0.00707	-0.00421	-0.00941	-0.0076	-0.00357	-0.00527	-0.01301	-0.02049	-0.02424	-0.02226	-0.01971	-0.01894	-0.01486	-0.00917	-0.00824	-0.01052	-0.01024	-0.00803	-0.01245	-0.02354	-0.02962	-0.02648	-0.02063	-0.01222	-0.00743	-0.01679	-0.02344	-0.02171	-0.01991	-0.01834	-0.01502
0.09383	0.0088	0.01116	-0.00424	-0.01975	-0.02071	-0.01843	-0.02477	-0.0361	-0.04098	-0.04264	-0.05077	-0.05443	-0.04502	-0.03003	-0.01246	0.00357	0.01376	0.01553	0.00709	-0.00418	-0.00934	-0.0075	-0.00348	-0.00519	-0.01298	-0.02056	-0.02441	-0.02249	-0.01998	-0.01921	-0.01514	-0.00939	-0.00837	-0.01064	-0.01033	-0.00802	-0.01237	-0.0234	-0.0295	-0.02648	-0.02064	-0.01212	-0.00727	-0.01661	-0.02322	-0.02151	-0.01984	-0.0185	-0.01541
0.09402	0.00894	0.01143	-0.00398	-0.01955	-0.02051	-0.0182	-0.02455	-0.03602	-0.04106	-0.04285	-0.05118	-0.05502	-0.04561	-0.0304	-0.01249	0.00374	0.01391	0.0156	0.00711	-0.00414	-0.00926	-0.0074	-0.00339	-0.00512	-0.01295	-0.02063	-0.02458	-0.02273	-0.02024	-0.01948	-0.01541	-0.00961	-0.00849	-0.01074	-0.01041	-0.008	-0.01228	-0.02326	-0.02937	-0.02648	-0.02065	-0.01203	-0.00712	-0.01642	-0.023	-0.02132	-0.01977	-0.01866	-0.0158
0.0942	0.00908	0.0117	-0.0037	-0.01934	-0.02031	-0.01797	-0.02433	-0.03593	-0.04113	-0.04305	-0.05159	-0.05561	-0.0462	-0.03078	-0.01253	0.0039	0.01407	0.01566	0.00713	-0.00411	-0.00919	-0.00731	-0.0033	-0.00505	-0.01293	-0.02071	-0.02476	-0.02296	-0.0205	-0.01975	-0.01567	-0.00981	-0.00859	-0.01084	-0.01049	-0.00799	-0.0122	-0.02311	-0.02924	-0.02647	-0.02065	-0.01193	-0.00697	-0.01624	-0.02278	-0.02113	-0.01969	-0.01881	-0.01618
0.09438	0.00923	0.01199	-0.00342	-0.01912	-0.02011	-0.01773	-0.0241	-0.03584	-0.04121	-0.04325	-0.05199	-0.0562	-0.04679	-0.03115	-0.01257	0.00406	0.01422	0.01572	0.00714	-0.00407	-0.00912	-0.00722	-0.00321	-0.00497	-0.0129	-0.02078	-0.02492	-0.02318	-0.02076	-0.02002	-0.01592	-0.01	-0.00868	-0.01093	-0.01056	-0.00797	-0.01211	-0.02296	-0.02911	-0.02646	-0.02066	-0.01184	-0.00682	-0.01606	-0.02256	-0.02094	-0.01962	-0.01897	-0.01656
0.09457	0.00938	0.01229	-0.00312	-0.01889	-0.0199	-0.01749	-0.02387	-0.03575	-0.04128	-0.04345	-0.05239	-0.05678	-0.04737	-0.03152	-0.01261	0.00423	0.01436	0.01577	0.00716	-0.00403	-0.00905	-0.00713	-0.00312	-0.0049	-0.01287	-0.02085	-0.02509	-0.02341	-0.02102	-0.02028	-0.01617	-0.01018	-0.00876	-0.011	-0.01063	-0.00795	-0.01202	-0.02281	-0.02898	-0.02645	-0.02066	-0.01174	-0.00668	-0.01588	-0.02234	-0.02075	-0.01955	-0.01912	-0.01694
0.09475	0.00953	0.01259	-0.00282	-0.01865	-0.01968	-0.01724	-0.02364	-0.03566	-0.04134	-0.04365	-0.05279	-0.05735	-0.04795	-0.0319	-0.01265	0.00439	0.01451	0.01583	0.00718	-0.00399	-0.00897	-0.00704	-0.00304	-0.00482	-0.01285	-0.02093	-0.02526	-0.02363	-0.02127	-0.02054	-0.01641	-0.01035	-0.00883	-0.01107	-0.0107	-0.00793	-0.01192	-0.02266	-0.02884	-0.02643	-0.02065	-0.01165	-0.00655	-0.0157	-0.02212	-0.02056	-0.01948	-0.01927	-0.01732
0.09494	0.00969	0.0129	-0.0025	-0.0184	-0.01946	-0.017	-0.02341	-0.03556	-0.04141	-0.04384	-0.05319	-0.05792	-0.04854	-0.03227	-0.01268	0.00455	0.01465	0.01587	0.0072	-0.00394	-0.0089	-0.00696	-0.00295	-0.00475	-0.01282	-0.021	-0.02542	-0.02385	-0.02153	-0.02079	-0.01664	-0.01051	-0.00889	-0.01113	-0.01076	-0.0079	-0.01183	-0.0225	-0.0287	-0.02641	-0.02065	-0.01157	-0.00642	-0.01552	-0.0219	-0.02038	-0.01941	-0.01942	-0.0177
0.09512	0.00985	0.01322	-0.00218	-0.01814	-0.01923	-0.01675	-0.02318	-0.03547	-0.04148	-0.04404	-0.05358	-0.05849	-0.04911	-0.03264	-0.01272	0.00471	0.01479	0.01592	0.00722	-0.00389	-0.00883	-0.00688	-0.00287	-0.00467	-0.01279	-0.02108	-0.02559	-0.02407	-0.02178	-0.02104	-0.01687	-0.01066	-0.00894	-0.01118	-0.01081	-0.00788	-0.01173	-0.02235	-0.02856	-0.02639	-0.02064	-0.01148	-0.00629	-0.01535	-0.02168	-0.02019	-0.01934	-0.01956	-0.01807
0.09531	0.01002	0.01355	-0.00184	-0.01788	-0.019	-0.0165	-0.02295	-0.03537	-0.04154	-0.04424	-0.05396	-0.05905	-0.04969	-0.03301	-0.01275	0.00487	0.01492	0.01596	0.00723	-0.00384	-0.00876	-0.00681	-0.00279	-0.0046	-0.01276	-0.02115	-0.02575	-0.02429	-0.02203	-0.02128	-0.01708	-0.0108	-0.00897	-0.01123	-0.01086	-0.00785	-0.01163	-0.02219	-0.02841	-0.02636	-0.02063	-0.0114	-0.00617	-0.01517	-0.02146	-0.02	-0.01927	-0.0197	-0.01844
0.09549	0.01018	0.01388	-0.0015	-0.0176	-0.01876	-0.01624	-0.02271	-0.03527	-0.04161	-0.04443	-0.05435	-0.05961	-0.05026	-0.03338	-0.01278	0.00503	0.01505	0.01599	0.00725	-0.00379	-0.0087	-0.00673	-0.00271	-0.00452	-0.01273	-0.02123	-0.02591	-0.0245	-0.02227	-0.02152	-0.01729	-0.01092	-0.009	-0.01126	-0.01091	-0.00782	-0.01154	-0.02202	-0.02826	-0.02633	-0.02062	-0.01131	-0.00605	-0.015	-0.02123	-0.01982	-0.01921	-0.01984	-0.0188
0.09568	0.01036	0.01422	-0.00114	-0.01732	-0.01851	-0.01599	-0.02248	-0.03517	-0.04167	-0.04462	-0.05473	-0.06016	-0.05083	-0.03374	-0.01281	0.00519	0.01518	0.01603	0.00727	-0.00374	-0.00863	-0.00666	-0.00263	-0.00444	-0.0127	-0.0213	-0.02606	-0.02471	-0.02251	-0.02176	-0.01749	-0.01104	-0.00901	-0.01128	-0.01095	-0.00779	-0.01144	-0.02186	-0.02811	-0.02629	-0.0206	-0.01123	-0.00594	-0.01483	-0.02101	-0.01964	-0.01914	-0.01998	-0.01916
0.09586	0.01053	0.01457	-0.000775522	-0.01703	-0.01826	-0.01573	-0.02224	-0.03507	-0.04173	-0.04481	-0.05511	-0.0607	-0.05139	-0.03411	-0.01284	0.00535	0.01531	0.01606	0.00729	-0.00368	-0.00856	-0.0066	-0.00255	-0.00436	-0.01267	-0.02138	-0.02622	-0.02491	-0.02275	-0.02199	-0.01769	-0.01115	-0.00901	-0.0113	-0.01099	-0.00776	-0.01133	-0.02169	-0.02795	-0.02625	-0.02058	-0.01116	-0.00583	-0.01466	-0.02079	-0.01945	-0.01907	-0.02011	-0.01952
0.09605	0.01071	0.01493	-0.000400399	-0.01673	-0.01801	-0.01547	-0.022	-0.03497	-0.04179	-0.04501	-0.05548	-0.06124	-0.05195	-0.03447	-0.01287	0.00551	0.01543	0.01609	0.00731	-0.00362	-0.00849	-0.00654	-0.00247	-0.00428	-0.01264	-0.02146	-0.02637	-0.02511	-0.02299	-0.02222	-0.01787	-0.01124	-0.009	-0.01131	-0.01103	-0.00773	-0.01123	-0.02152	-0.02779	-0.02621	-0.02056	-0.01108	-0.00573	-0.0145	-0.02057	-0.01927	-0.019	-0.02024	-0.01987
0.09623	0.01089	0.0153	-1.57243e-05	-0.01641	-0.01775	-0.01522	-0.02177	-0.03486	-0.04185	-0.0452	-0.05585	-0.06177	-0.05251	-0.03483	-0.0129	0.00567	0.01556	0.01611	0.00733	-0.00355	-0.00843	-0.00648	-0.0024	-0.0042	-0.01261	-0.02153	-0.02653	-0.02531	-0.02322	-0.02243	-0.01805	-0.01133	-0.00897	-0.01131	-0.01106	-0.00769	-0.01113	-0.02135	-0.02763	-0.02616	-0.02054	-0.01101	-0.00563	-0.01433	-0.02035	-0.01909	-0.01894	-0.02037	-0.02022
0.09642	0.01107	0.01567	0.000378362	-0.0161	-0.01748	-0.01496	-0.02153	-0.03476	-0.04191	-0.04538	-0.05622	-0.0623	-0.05306	-0.03519	-0.01292	0.00583	0.01568	0.01613	0.00736	-0.00349	-0.00836	-0.00642	-0.00232	-0.00412	-0.01258	-0.02161	-0.02667	-0.0255	-0.02345	-0.02265	-0.01822	-0.0114	-0.00894	-0.0113	-0.01109	-0.00766	-0.01103	-0.02118	-0.02746	-0.02611	-0.02051	-0.01094	-0.00553	-0.01417	-0.02013	-0.01892	-0.01887	-0.02049	-0.02056
0.0966	0.01126	0.01605	0.00078172	-0.01577	-0.01721	-0.0147	-0.0213	-0.03465	-0.04196	-0.04557	-0.05658	-0.06282	-0.05361	-0.03554	-0.01294	0.00599	0.01579	0.01615	0.00738	-0.00342	-0.0083	-0.00637	-0.00225	-0.00404	-0.01254	-0.02168	-0.02682	-0.02569	-0.02368	-0.02286	-0.01837	-0.01147	-0.00889	-0.01128	-0.01111	-0.00762	-0.01092	-0.021	-0.0273	-0.02606	-0.02049	-0.01087	-0.00544	-0.01401	-0.01991	-0.01874	-0.01881	-0.02061	-0.0209
0.09679	0.01145	0.01643	0.00119	-0.01543	-0.01694	-0.01444	-0.02106	-0.03455	-0.04202	-0.04576	-0.05694	-0.06333	-0.05415	-0.03589	-0.01296	0.00615	0.01591	0.01617	0.00741	-0.00334	-0.00824	-0.00633	-0.00218	-0.00395	-0.01251	-0.02176	-0.02697	-0.02587	-0.0239	-0.02306	-0.01853	-0.01152	-0.00883	-0.01126	-0.01113	-0.00759	-0.01081	-0.02083	-0.02713	-0.026	-0.02046	-0.0108	-0.00536	-0.01385	-0.01969	-0.01856	-0.01874	-0.02073	-0.02123
0.09697	0.01164	0.01682	0.00162	-0.01508	-0.01666	-0.01417	-0.02083	-0.03444	-0.04208	-0.04595	-0.0573	-0.06383	-0.05468	-0.03623	-0.01298	0.00631	0.01602	0.01619	0.00743	-0.00327	-0.00818	-0.00629	-0.00211	-0.00386	-0.01247	-0.02183	-0.02711	-0.02605	-0.02411	-0.02326	-0.01867	-0.01156	-0.00876	-0.01122	-0.01114	-0.00755	-0.01071	-0.02065	-0.02696	-0.02594	-0.02043	-0.01074	-0.00528	-0.0137	-0.01948	-0.01839	-0.01868	-0.02084	-0.02156
0.09716	0.01183	0.01722	0.00205	-0.01473	-0.01637	-0.01391	-0.0206	-0.03433	-0.04213	-0.04613	-0.05765	-0.06433	-0.05521	-0.03658	-0.01299	0.00647	0.01614	0.0162	0.00746	-0.00319	-0.00812	-0.00625	-0.00204	-0.00377	-0.01243	-0.02191	-0.02725	-0.02623	-0.02432	-0.02345	-0.0188	-0.01159	-0.00868	-0.01118	-0.01116	-0.00751	-0.0106	-0.02047	-0.02678	-0.02587	-0.02039	-0.01067	-0.0052	-0.01354	-0.01926	-0.01822	-0.01861	-0.02095	-0.02188
0.09734	0.01203	0.01762	0.00249	-0.01437	-0.01608	-0.01365	-0.02037	-0.03423	-0.04218	-0.04632	-0.058	-0.06483	-0.05573	-0.03691	-0.013	0.00664	0.01625	0.01621	0.00749	-0.00311	-0.00806	-0.00621	-0.00197	-0.00368	-0.01239	-0.02198	-0.02739	-0.0264	-0.02453	-0.02364	-0.01893	-0.01161	-0.00859	-0.01113	-0.01117	-0.00747	-0.01049	-0.02028	-0.02661	-0.02581	-0.02036	-0.01061	-0.00513	-0.01339	-0.01904	-0.01805	-0.01855	-0.02106	-0.0222
0.09752	0.01223	0.01803	0.00293	-0.014	-0.01579	-0.01339	-0.02014	-0.03412	-0.04224	-0.0465	-0.05834	-0.06531	-0.05625	-0.03724	-0.01301	0.0068	0.01636	0.01622	0.00752	-0.00302	-0.008	-0.00619	-0.00191	-0.00358	-0.01235	-0.02206	-0.02752	-0.02657	-0.02473	-0.02382	-0.01905	-0.01162	-0.00849	-0.01108	-0.01117	-0.00743	-0.01038	-0.0201	-0.02643	-0.02574	-0.02032	-0.01055	-0.00506	-0.01324	-0.01883	-0.01788	-0.01848	-0.02116	-0.02251
0.09771	0.01243	0.01845	0.00339	-0.01362	-0.01549	-0.01313	-0.01991	-0.03402	-0.04229	-0.04668	-0.05868	-0.06579	-0.05676	-0.03757	-0.01301	0.00697	0.01646	0.01622	0.00755	-0.00293	-0.00795	-0.00616	-0.00184	-0.00349	-0.01231	-0.02213	-0.02766	-0.02673	-0.02493	-0.02399	-0.01916	-0.01162	-0.00838	-0.01101	-0.01117	-0.0074	-0.01027	-0.01991	-0.02625	-0.02566	-0.02028	-0.0105	-0.005	-0.01309	-0.01862	-0.01771	-0.01842	-0.02126	-0.02282
0.09789	0.01263	0.01887	0.00385	-0.01323	-0.01518	-0.01286	-0.01968	-0.03391	-0.04234	-0.04686	-0.05901	-0.06626	-0.05726	-0.0379	-0.01301	0.00713	0.01657	0.01623	0.00759	-0.00284	-0.00789	-0.00614	-0.00178	-0.00339	-0.01226	-0.0222	-0.02779	-0.02689	-0.02513	-0.02416	-0.01926	-0.01161	-0.00825	-0.01094	-0.01117	-0.00736	-0.01016	-0.01973	-0.02606	-0.02559	-0.02024	-0.01044	-0.00494	-0.01295	-0.0184	-0.01754	-0.01835	-0.02136	-0.02311
0.09808	0.01284	0.01929	0.00433	-0.01283	-0.01487	-0.0126	-0.01946	-0.0338	-0.04239	-0.04704	-0.05935	-0.06672	-0.05776	-0.03821	-0.01301	0.0073	0.01667	0.01623	0.00763	-0.00275	-0.00784	-0.00613	-0.00172	-0.00329	-0.01221	-0.02228	-0.02791	-0.02704	-0.02531	-0.02432	-0.01935	-0.01159	-0.00812	-0.01086	-0.01117	-0.00732	-0.01005	-0.01954	-0.02588	-0.02551	-0.02019	-0.01039	-0.00488	-0.0128	-0.01819	-0.01738	-0.01829	-0.02145	-0.02341
0.09826	0.01305	0.01973	0.00481	-0.01242	-0.01456	-0.01234	-0.01924	-0.0337	-0.04244	-0.04722	-0.05967	-0.06717	-0.05824	-0.03852	-0.013	0.00747	0.01678	0.01623	0.00766	-0.00265	-0.00779	-0.00612	-0.00166	-0.00318	-0.01216	-0.02235	-0.02804	-0.02719	-0.0255	-0.02448	-0.01943	-0.01155	-0.00797	-0.01077	-0.01116	-0.00727	-0.00994	-0.01935	-0.02569	-0.02543	-0.02015	-0.01034	-0.00483	-0.01266	-0.01798	-0.01722	-0.01822	-0.02153	-0.02369
0.09845	0.01326	0.02016	0.00529	-0.01201	-0.01424	-0.01208	-0.01902	-0.0336	-0.04249	-0.0474	-0.06	-0.06762	-0.05872	-0.03883	-0.01299	0.00764	0.01688	0.01623	0.00771	-0.00255	-0.00774	-0.00611	-0.0016	-0.00307	-0.01211	-0.02242	-0.02816	-0.02733	-0.02568	-0.02463	-0.0195	-0.01151	-0.00781	-0.01068	-0.01115	-0.00723	-0.00983	-0.01915	-0.0255	-0.02534	-0.0201	-0.01029	-0.00478	-0.01252	-0.01777	-0.01705	-0.01815	-0.02161	-0.02397
0.09863	0.01347	0.0206	0.00579	-0.01159	-0.01392	-0.01182	-0.0188	-0.03349	-0.04254	-0.04758	-0.06032	-0.06805	-0.0592	-0.03913	-0.01297	0.00781	0.01698	0.01623	0.00775	-0.00245	-0.00769	-0.00612	-0.00154	-0.00296	-0.01206	-0.0225	-0.02828	-0.02747	-0.02585	-0.02477	-0.01957	-0.01145	-0.00765	-0.01058	-0.01114	-0.00719	-0.00972	-0.01896	-0.02531	-0.02526	-0.02005	-0.01025	-0.00474	-0.01238	-0.01756	-0.0169	-0.01809	-0.02169	-0.02425
0.09882	0.01369	0.02105	0.00629	-0.01116	-0.01359	-0.01156	-0.01859	-0.03339	-0.04258	-0.04776	-0.06063	-0.06848	-0.05966	-0.03942	-0.01296	0.00799	0.01708	0.01623	0.00779	-0.00234	-0.00765	-0.00612	-0.00149	-0.00285	-0.012	-0.02257	-0.0284	-0.0276	-0.02602	-0.02491	-0.01963	-0.01139	-0.00747	-0.01047	-0.01113	-0.00715	-0.00961	-0.01876	-0.02511	-0.02517	-0.02	-0.0102	-0.0047	-0.01224	-0.01736	-0.01674	-0.01802	-0.02177	-0.02451
0.099	0.0139	0.0215	0.0068	-0.01072	-0.01326	-0.0113	-0.01838	-0.03329	-0.04263	-0.04793	-0.06094	-0.0689	-0.06011	-0.03971	-0.01293	0.00816	0.01718	0.01623	0.00784	-0.00223	-0.0076	-0.00613	-0.00143	-0.00273	-0.01194	-0.02264	-0.02851	-0.02772	-0.02618	-0.02503	-0.01968	-0.01131	-0.00728	-0.01035	-0.01111	-0.00711	-0.0095	-0.01857	-0.02492	-0.02507	-0.01995	-0.01016	-0.00466	-0.01211	-0.01715	-0.01658	-0.01796	-0.02183	-0.02477
0.09919	0.01412	0.02195	0.00732	-0.01028	-0.01292	-0.01104	-0.01817	-0.03319	-0.04268	-0.04811	-0.06125	-0.06931	-0.06056	-0.03999	-0.01291	0.00834	0.01728	0.01623	0.00789	-0.00212	-0.00756	-0.00615	-0.00138	-0.00261	-0.01188	-0.02271	-0.02862	-0.02785	-0.02633	-0.02516	-0.01971	-0.01122	-0.00708	-0.01023	-0.01109	-0.00707	-0.00939	-0.01837	-0.02472	-0.02498	-0.01989	-0.01012	-0.00463	-0.01198	-0.01695	-0.01643	-0.01789	-0.0219	-0.02502
0.09937	0.01434	0.02241	0.00784	-0.00982	-0.01258	-0.01078	-0.01796	-0.03309	-0.04272	-0.04828	-0.06155	-0.06972	-0.061	-0.04026	-0.01288	0.00852	0.01738	0.01622	0.00795	-0.002	-0.00752	-0.00617	-0.00133	-0.00249	-0.01182	-0.02278	-0.02873	-0.02796	-0.02649	-0.02527	-0.01975	-0.01113	-0.00688	-0.0101	-0.01106	-0.00703	-0.00927	-0.01817	-0.02452	-0.02488	-0.01984	-0.01008	-0.0046	-0.01185	-0.01675	-0.01627	-0.01782	-0.02196	-0.02527
0.09956	0.01456	0.02287	0.00837	-0.00936	-0.01223	-0.01053	-0.01776	-0.03299	-0.04277	-0.04845	-0.06185	-0.07011	-0.06142	-0.04053	-0.01284	0.0087	0.01748	0.01622	0.008	-0.00188	-0.00748	-0.0062	-0.00128	-0.00236	-0.01175	-0.02285	-0.02884	-0.02807	-0.02663	-0.02538	-0.01977	-0.01102	-0.00666	-0.00997	-0.01104	-0.00699	-0.00916	-0.01797	-0.02432	-0.02478	-0.01978	-0.01004	-0.00457	-0.01172	-0.01655	-0.01612	-0.01775	-0.02201	-0.0255
0.09974	0.01478	0.02334	0.0089	-0.00889	-0.01188	-0.01027	-0.01756	-0.03289	-0.04281	-0.04862	-0.06214	-0.07049	-0.06184	-0.04079	-0.0128	0.00888	0.01758	0.01621	0.00806	-0.00176	-0.00744	-0.00623	-0.00123	-0.00223	-0.01168	-0.02292	-0.02894	-0.02818	-0.02677	-0.02549	-0.01978	-0.0109	-0.00643	-0.00982	-0.01101	-0.00695	-0.00905	-0.01777	-0.02412	-0.02468	-0.01973	-0.01001	-0.00455	-0.01159	-0.01635	-0.01597	-0.01769	-0.02206	-0.02573
0.09993	0.015	0.02381	0.00945	-0.00842	-0.01152	-0.01002	-0.01737	-0.0328	-0.04285	-0.04879	-0.06243	-0.07087	-0.06225	-0.04104	-0.01276	0.00906	0.01767	0.01621	0.00812	-0.00163	-0.00741	-0.00627	-0.00118	-0.00209	-0.01161	-0.02299	-0.02904	-0.02828	-0.02691	-0.02558	-0.01979	-0.01078	-0.0062	-0.00968	-0.01098	-0.00691	-0.00894	-0.01756	-0.02391	-0.02458	-0.01967	-0.00998	-0.00453	-0.01147	-0.01615	-0.01582	-0.01762	-0.02211	-0.02595
0.10011	0.01522	0.02428	0.00999	-0.00794	-0.01116	-0.00976	-0.01718	-0.0327	-0.04289	-0.04896	-0.06271	-0.07123	-0.06265	-0.04128	-0.01271	0.00925	0.01777	0.0162	0.00818	-0.00151	-0.00738	-0.00631	-0.00113	-0.00195	-0.01154	-0.02306	-0.02914	-0.02837	-0.02703	-0.02567	-0.01979	-0.01064	-0.00595	-0.00952	-0.01095	-0.00687	-0.00882	-0.01736	-0.02371	-0.02448	-0.01961	-0.00994	-0.00451	-0.01134	-0.01595	-0.01568	-0.01755	-0.02215	-0.02617
0.1003	0.01545	0.02475	0.01054	-0.00745	-0.01079	-0.00951	-0.01699	-0.03261	-0.04293	-0.04913	-0.06299	-0.07159	-0.06304	-0.04152	-0.01266	0.00944	0.01787	0.0162	0.00825	-0.00138	-0.00734	-0.00636	-0.00109	-0.00181	-0.01146	-0.02312	-0.02923	-0.02846	-0.02716	-0.02576	-0.01977	-0.01049	-0.0057	-0.00937	-0.01091	-0.00683	-0.00871	-0.01715	-0.0235	-0.02437	-0.01955	-0.00991	-0.0045	-0.01122	-0.01576	-0.01553	-0.01748	-0.02218	-0.02637
0.10048	0.01567	0.02522	0.0111	-0.00695	-0.01042	-0.00925	-0.0168	-0.03252	-0.04298	-0.04929	-0.06326	-0.07194	-0.06341	-0.04175	-0.0126	0.00963	0.01797	0.01619	0.00832	-0.00124	-0.00732	-0.00642	-0.00104	-0.00166	-0.01138	-0.02319	-0.02932	-0.02855	-0.02727	-0.02583	-0.01976	-0.01034	-0.00544	-0.0092	-0.01088	-0.00679	-0.0086	-0.01695	-0.02329	-0.02426	-0.01949	-0.00989	-0.00448	-0.0111	-0.01557	-0.01539	-0.0174	-0.02221	-0.02657
0.10066	0.0159	0.0257	0.01166	-0.00645	-0.01005	-0.009	-0.01662	-0.03243	-0.04302	-0.04946	-0.06353	-0.07228	-0.06378	-0.04196	-0.01254	0.00982	0.01806	0.01619	0.00839	-0.00111	-0.00729	-0.00648	-0.001	-0.00151	-0.01129	-0.02326	-0.02941	-0.02863	-0.02738	-0.0259	-0.01973	-0.01017	-0.00517	-0.00903	-0.01084	-0.00675	-0.00849	-0.01674	-0.02308	-0.02415	-0.01942	-0.00986	-0.00447	-0.01098	-0.01538	-0.01525	-0.01733	-0.02224	-0.02676
0.10085	0.01612	0.02618	0.01223	-0.00594	-0.00967	-0.00875	-0.01644	-0.03234	-0.04305	-0.04962	-0.06379	-0.0726	-0.06414	-0.04217	-0.01247	0.01002	0.01816	0.01619	0.00846	-0.000967491	-0.00727	-0.00655	-0.000960178	-0.00136	-0.01121	-0.02332	-0.0295	-0.0287	-0.02749	-0.02597	-0.01969	-0.01	-0.00489	-0.00886	-0.0108	-0.00672	-0.00837	-0.01653	-0.02287	-0.02404	-0.01936	-0.00984	-0.00447	-0.01086	-0.01519	-0.01511	-0.01726	-0.02226	-0.02694
0.10103	0.01635	0.02666	0.0128	-0.00542	-0.00929	-0.0085	-0.01627	-0.03225	-0.04309	-0.04978	-0.06405	-0.07292	-0.06448	-0.04238	-0.0124	0.01021	0.01826	0.01618	0.00854	-0.0008266	-0.00724	-0.00662	-0.000920428	-0.0012	-0.01112	-0.02338	-0.02958	-0.02877	-0.02759	-0.02602	-0.01965	-0.00982	-0.0046	-0.00868	-0.01076	-0.00668	-0.00826	-0.01632	-0.02266	-0.02392	-0.0193	-0.00981	-0.00446	-0.01075	-0.015	-0.01497	-0.01719	-0.02228	-0.02711
0.10122	0.01657	0.02714	0.01337	-0.0049	-0.0089	-0.00825	-0.0161	-0.03217	-0.04313	-0.04994	-0.06431	-0.07323	-0.06482	-0.04257	-0.01232	0.01041	0.01836	0.01618	0.00861	-0.000683461	-0.00723	-0.0067	-0.000881936	-0.00103	-0.01103	-0.02345	-0.02966	-0.02883	-0.02768	-0.02608	-0.0196	-0.00963	-0.00431	-0.00849	-0.01071	-0.00664	-0.00815	-0.01611	-0.02245	-0.02381	-0.01923	-0.00979	-0.00446	-0.01063	-0.01482	-0.01483	-0.01711	-0.02229	-0.02728
0.1014	0.0168	0.02763	0.01395	-0.00437	-0.0085	-0.008	-0.01594	-0.03209	-0.04317	-0.0501	-0.06455	-0.07353	-0.06514	-0.04275	-0.01224	0.01061	0.01845	0.01617	0.00869	-0.000538182	-0.00721	-0.00678	-0.000844681	-0.000866753	-0.01093	-0.02351	-0.02973	-0.02889	-0.02777	-0.02612	-0.01955	-0.00943	-0.00401	-0.0083	-0.01067	-0.0066	-0.00804	-0.0159	-0.02223	-0.02369	-0.01917	-0.00977	-0.00446	-0.01052	-0.01463	-0.0147	-0.01703	-0.02229	-0.02744
0.10159	0.01703	0.02811	0.01453	-0.00383	-0.00811	-0.00776	-0.01577	-0.03201	-0.0432	-0.05025	-0.0648	-0.07382	-0.06545	-0.04293	-0.01215	0.01081	0.01855	0.01617	0.00878	-0.000390871	-0.0072	-0.00687	-0.000808645	-0.000694313	-0.01083	-0.02357	-0.0298	-0.02894	-0.02786	-0.02616	-0.01948	-0.00922	-0.0037	-0.00811	-0.01062	-0.00657	-0.00793	-0.01569	-0.02202	-0.02358	-0.01911	-0.00976	-0.00446	-0.01041	-0.01445	-0.01457	-0.01696	-0.02229	-0.02758
0.10177	0.01725	0.02859	0.01512	-0.00329	-0.0077	-0.00751	-0.01562	-0.03193	-0.04324	-0.0504	-0.06504	-0.07409	-0.06575	-0.0431	-0.01206	0.01102	0.01865	0.01617	0.00886	-0.000241634	-0.00718	-0.00697	-0.000773808	-0.000517364	-0.01073	-0.02363	-0.02987	-0.02899	-0.02793	-0.02619	-0.01941	-0.00901	-0.00338	-0.00791	-0.01057	-0.00653	-0.00781	-0.01547	-0.0218	-0.02346	-0.01904	-0.00974	-0.00446	-0.0103	-0.01427	-0.01443	-0.01688	-0.02229	-0.02772
0.10196	0.01747	0.02908	0.01571	-0.00275	-0.0073	-0.00726	-0.01546	-0.03186	-0.04327	-0.05056	-0.06527	-0.07436	-0.06604	-0.04325	-0.01197	0.01122	0.01875	0.01617	0.00895	-9.05932e-05	-0.00718	-0.00707	-0.00074015	-0.000335846	-0.01062	-0.02369	-0.02994	-0.02903	-0.028	-0.02622	-0.01933	-0.00878	-0.00306	-0.00771	-0.01052	-0.0065	-0.0077	-0.01526	-0.02159	-0.02334	-0.01898	-0.00973	-0.00447	-0.01019	-0.0141	-0.0143	-0.0168	-0.02228	-0.02785
0.10214	0.0177	0.02956	0.0163	-0.00219	-0.00689	-0.00702	-0.01532	-0.03178	-0.0433	-0.05071	-0.06549	-0.07462	-0.06632	-0.0434	-0.01187	0.01143	0.01885	0.01616	0.00904	6.20655e-05	-0.00717	-0.00718	-0.000707636	-0.000149749	-0.01052	-0.02374	-0.03	-0.02907	-0.02807	-0.02624	-0.01925	-0.00855	-0.00273	-0.0075	-0.01047	-0.00647	-0.00759	-0.01505	-0.02137	-0.02322	-0.01891	-0.00971	-0.00448	-0.01008	-0.01392	-0.01417	-0.01672	-0.02227	-0.02798
0.10233	0.01792	0.03004	0.01689	-0.00164	-0.00647	-0.00677	-0.01517	-0.03171	-0.04333	-0.05085	-0.06571	-0.07487	-0.06659	-0.04354	-0.01176	0.01164	0.01895	0.01616	0.00913	0.000216142	-0.00717	-0.00729	-0.000676232	4.09302e-05	-0.0104	-0.0238	-0.03006	-0.0291	-0.02813	-0.02625	-0.01915	-0.00832	-0.0024	-0.00729	-0.01042	-0.00643	-0.00748	-0.01483	-0.02115	-0.0231	-0.01884	-0.0097	-0.00449	-0.00998	-0.01375	-0.01405	-0.01664	-0.02225	-0.02809
0.10251	0.01814	0.03053	0.01748	-0.00107	-0.00605	-0.00653	-0.01503	-0.03164	-0.04337	-0.051	-0.06593	-0.0751	-0.06684	-0.04367	-0.01165	0.01185	0.01905	0.01616	0.00923	0.000371438	-0.00717	-0.00741	-0.000645901	0.000236191	-0.01029	-0.02386	-0.03011	-0.02913	-0.02818	-0.02626	-0.01906	-0.00807	-0.00206	-0.00708	-0.01037	-0.0064	-0.00737	-0.01462	-0.02094	-0.02297	-0.01878	-0.00969	-0.0045	-0.00987	-0.01358	-0.01392	-0.01656	-0.02222	-0.02819
0.1027	0.01837	0.03101	0.01808	-0.000507355	-0.00563	-0.00628	-0.01489	-0.03158	-0.0434	-0.05114	-0.06614	-0.07533	-0.06708	-0.04379	-0.01154	0.01207	0.01915	0.01616	0.00932	0.000527751	-0.00717	-0.00753	-0.000616607	0.000436035	-0.01017	-0.02391	-0.03016	-0.02915	-0.02823	-0.02626	-0.01895	-0.00782	-0.00171	-0.00686	-0.01031	-0.00637	-0.00726	-0.0144	-0.02072	-0.02285	-0.01872	-0.00968	-0.00451	-0.00977	-0.01341	-0.0138	-0.01647	-0.02219	-0.02829
0.10288	0.01859	0.03149	0.01868	6.39475e-05	-0.0052	-0.00604	-0.01476	-0.03151	-0.04342	-0.05128	-0.06634	-0.07555	-0.06731	-0.0439	-0.01142	0.01228	0.01925	0.01616	0.00942	0.000684881	-0.00718	-0.00766	-0.000588315	0.000640462	-0.01005	-0.02396	-0.03021	-0.02916	-0.02827	-0.02626	-0.01884	-0.00757	-0.00136	-0.00664	-0.01026	-0.00634	-0.00716	-0.01419	-0.0205	-0.02273	-0.01865	-0.00968	-0.00452	-0.00967	-0.01324	-0.01367	-0.01639	-0.02216	-0.02838
0.10307	0.01881	0.03197	0.01928	0.000639559	-0.00477	-0.0058	-0.01463	-0.03145	-0.04345	-0.05142	-0.06654	-0.07575	-0.06753	-0.044	-0.0113	0.0125	0.01935	0.01617	0.00952	0.00084263	-0.00719	-0.0078	-0.000560989	0.000849475	-0.00992	-0.02401	-0.03026	-0.02918	-0.02831	-0.02625	-0.01873	-0.0073	-0.00101	-0.00642	-0.0102	-0.00631	-0.00705	-0.01397	-0.02028	-0.02261	-0.01859	-0.00967	-0.00454	-0.00957	-0.01308	-0.01355	-0.0163	-0.02212	-0.02846
0.10325	0.01902	0.03244	0.01987	0.00122	-0.00433	-0.00556	-0.01451	-0.03139	-0.04348	-0.05156	-0.06673	-0.07595	-0.06774	-0.04409	-0.01117	0.01272	0.01946	0.01617	0.00962	0.001	-0.0072	-0.00794	-0.000534593	0.00106	-0.0098	-0.02406	-0.0303	-0.02918	-0.02835	-0.02623	-0.01861	-0.00704	-0.000647927	-0.00619	-0.01015	-0.00628	-0.00694	-0.01376	-0.02006	-0.02248	-0.01852	-0.00967	-0.00455	-0.00947	-0.01291	-0.01343	-0.01622	-0.02208	-0.02852
0.10344	0.01924	0.03292	0.02047	0.0018	-0.0039	-0.00532	-0.01439	-0.03133	-0.0435	-0.05169	-0.06692	-0.07613	-0.06793	-0.04418	-0.01104	0.01294	0.01956	0.01617	0.00972	0.00116	-0.00721	-0.00809	-0.000509091	0.00128	-0.00967	-0.02411	-0.03034	-0.02918	-0.02837	-0.02621	-0.01848	-0.00676	-0.000285548	-0.00597	-0.01009	-0.00625	-0.00683	-0.01354	-0.01985	-0.02236	-0.01846	-0.00967	-0.00457	-0.00937	-0.01275	-0.01331	-0.01613	-0.02203	-0.02859
0.10362	0.01946	0.03339	0.02108	0.00239	-0.00345	-0.00508	-0.01428	-0.03128	-0.04353	-0.05182	-0.0671	-0.07631	-0.06811	-0.04425	-0.0109	0.01316	0.01966	0.01617	0.00982	0.00132	-0.00723	-0.00824	-0.000484448	0.0015	-0.00953	-0.02415	-0.03037	-0.02918	-0.0284	-0.02619	-0.01835	-0.00649	8.02915e-05	-0.00574	-0.01003	-0.00622	-0.00673	-0.01333	-0.01963	-0.02224	-0.0184	-0.00967	-0.00459	-0.00927	-0.01259	-0.01319	-0.01604	-0.02197	-0.02864
0.1038	0.01967	0.03386	0.02168	0.00298	-0.00301	-0.00484	-0.01417	-0.03123	-0.04355	-0.05195	-0.06727	-0.07647	-0.06828	-0.04431	-0.01076	0.01338	0.01977	0.01618	0.00993	0.00148	-0.00725	-0.0084	-0.000460628	0.00173	-0.0094	-0.0242	-0.0304	-0.02917	-0.02841	-0.02616	-0.01822	-0.00621	0.000449244	-0.00551	-0.00997	-0.00619	-0.00662	-0.01311	-0.01941	-0.02211	-0.01834	-0.00967	-0.00461	-0.00917	-0.01244	-0.01308	-0.01595	-0.02192	-0.02868
0.10399	0.01988	0.03433	0.02228	0.00357	-0.00256	-0.00461	-0.01406	-0.03118	-0.04357	-0.05207	-0.06744	-0.07662	-0.06844	-0.04437	-0.01062	0.01361	0.01987	0.01618	0.01003	0.00163	-0.00728	-0.00856	-0.000437595	0.00196	-0.00925	-0.02424	-0.03043	-0.02916	-0.02843	-0.02613	-0.01808	-0.00592	0.000820953	-0.00527	-0.00991	-0.00617	-0.00652	-0.0129	-0.01919	-0.02199	-0.01828	-0.00968	-0.00463	-0.00908	-0.01228	-0.01296	-0.01586	-0.02185	-0.02871
0.10417	0.02009	0.0348	0.02287	0.00417	-0.0021	-0.00437	-0.01396	-0.03113	-0.0436	-0.05219	-0.0676	-0.07677	-0.06858	-0.04441	-0.01047	0.01383	0.01998	0.01619	0.01014	0.00179	-0.00731	-0.00873	-0.000415317	0.0022	-0.00911	-0.02428	-0.03045	-0.02914	-0.02843	-0.02609	-0.01793	-0.00563	0.0012	-0.00504	-0.00985	-0.00614	-0.00641	-0.01268	-0.01898	-0.02187	-0.01822	-0.00968	-0.00465	-0.00899	-0.01213	-0.01285	-0.01577	-0.02179	-0.02874
0.10436	0.0203	0.03526	0.02347	0.00477	-0.00165	-0.00413	-0.01386	-0.03109	-0.04362	-0.05231	-0.06775	-0.0769	-0.06872	-0.04445	-0.01032	0.01406	0.02008	0.01619	0.01024	0.00195	-0.00734	-0.0089	-0.000393762	0.00244	-0.00897	-0.02432	-0.03047	-0.02912	-0.02844	-0.02604	-0.01778	-0.00534	0.00157	-0.00481	-0.00979	-0.00612	-0.00631	-0.01247	-0.01876	-0.02174	-0.01816	-0.00969	-0.00467	-0.00889	-0.01198	-0.01274	-0.01567	-0.02172	-0.02876
0.10454	0.02051	0.03572	0.02407	0.00537	-0.00119	-0.0039	-0.01377	-0.03105	-0.04363	-0.05242	-0.0679	-0.07702	-0.06884	-0.04447	-0.01016	0.01429	0.02019	0.0162	0.01035	0.0021	-0.00738	-0.00908	-0.000372898	0.00269	-0.00882	-0.02436	-0.03049	-0.02909	-0.02843	-0.026	-0.01763	-0.00504	0.00195	-0.00457	-0.00973	-0.00609	-0.0062	-0.01226	-0.01854	-0.02162	-0.01811	-0.0097	-0.0047	-0.0088	-0.01183	-0.01263	-0.01558	-0.02164	-0.02877
0.10473	0.02071	0.03617	0.02467	0.00598	-0.000724214	-0.00366	-0.01368	-0.03101	-0.04365	-0.05253	-0.06804	-0.07713	-0.06894	-0.04449	-0.01	0.01452	0.0203	0.01621	0.01045	0.00226	-0.00742	-0.00926	-0.000352692	0.00294	-0.00866	-0.0244	-0.0305	-0.02906	-0.02843	-0.02594	-0.01748	-0.00475	0.00233	-0.00433	-0.00967	-0.00607	-0.0061	-0.01204	-0.01833	-0.0215	-0.01805	-0.00971	-0.00472	-0.00872	-0.01169	-0.01252	-0.01548	-0.02156	-0.02876
0.10491	0.02091	0.03662	0.02526	0.00658	-0.000258844	-0.00343	-0.0136	-0.03097	-0.04367	-0.05264	-0.06818	-0.07723	-0.06904	-0.04449	-0.00984	0.01475	0.02041	0.01621	0.01056	0.00241	-0.00746	-0.00945	-0.000333113	0.00319	-0.00851	-0.02443	-0.03051	-0.02903	-0.02842	-0.02589	-0.01732	-0.00445	0.00271	-0.0041	-0.00961	-0.00605	-0.006	-0.01183	-0.01811	-0.02137	-0.018	-0.00973	-0.00475	-0.00863	-0.01155	-0.01241	-0.01539	-0.02148	-0.02876
0.1051	0.02111	0.03707	0.02585	0.00719	0.000209113	-0.0032	-0.01352	-0.03094	-0.04368	-0.05275	-0.0683	-0.07732	-0.06912	-0.04449	-0.00967	0.01498	0.02051	0.01622	0.01066	0.00256	-0.00751	-0.00964	-0.000314128	0.00345	-0.00835	-0.02446	-0.03051	-0.02899	-0.0284	-0.02583	-0.01716	-0.00415	0.00309	-0.00386	-0.00955	-0.00603	-0.0059	-0.01162	-0.0179	-0.02125	-0.01795	-0.00974	-0.00477	-0.00854	-0.01141	-0.0123	-0.01529	-0.02139	-0.02874
0.10528	0.02131	0.03752	0.02644	0.0078	0.000679493	-0.00297	-0.01345	-0.03091	-0.0437	-0.05285	-0.06842	-0.0774	-0.06919	-0.04448	-0.0095	0.01521	0.02062	0.01623	0.01077	0.00271	-0.00756	-0.00984	-0.000295706	0.00371	-0.00819	-0.02449	-0.03051	-0.02895	-0.02838	-0.02576	-0.017	-0.00384	0.00347	-0.00362	-0.00949	-0.00601	-0.0058	-0.01141	-0.01768	-0.02113	-0.0179	-0.00976	-0.0048	-0.00846	-0.01127	-0.01219	-0.01519	-0.0213	-0.02871
0.10547	0.0215	0.03796	0.02703	0.00841	0.00115	-0.00274	-0.01338	-0.03089	-0.04371	-0.05294	-0.06854	-0.07746	-0.06925	-0.04445	-0.00933	0.01545	0.02073	0.01623	0.01087	0.00285	-0.00762	-0.01004	-0.000277814	0.00397	-0.00803	-0.02452	-0.03051	-0.0289	-0.02836	-0.0257	-0.01683	-0.00354	0.00385	-0.00338	-0.00943	-0.00599	-0.0057	-0.0112	-0.01747	-0.02101	-0.01785	-0.00978	-0.00483	-0.00837	-0.01113	-0.01209	-0.01509	-0.0212	-0.02868
0.10565	0.02169	0.03839	0.02761	0.00902	0.00163	-0.00251	-0.01332	-0.03086	-0.04372	-0.05303	-0.06864	-0.07752	-0.0693	-0.04442	-0.00915	0.01568	0.02084	0.01624	0.01097	0.00299	-0.00768	-0.01025	-0.00026042	0.00424	-0.00786	-0.02454	-0.03051	-0.02885	-0.02833	-0.02563	-0.01667	-0.00323	0.00423	-0.00315	-0.00937	-0.00597	-0.00561	-0.01099	-0.01725	-0.02089	-0.01781	-0.0098	-0.00485	-0.00829	-0.011	-0.01199	-0.01499	-0.0211	-0.02864
0.10584	0.02188	0.03882	0.0282	0.00963	0.0021	-0.00228	-0.01326	-0.03084	-0.04373	-0.05312	-0.06874	-0.07757	-0.06933	-0.04438	-0.00897	0.01591	0.02095	0.01625	0.01107	0.00313	-0.00775	-0.01046	-0.000243492	0.00452	-0.00769	-0.02457	-0.03049	-0.02879	-0.0283	-0.02555	-0.0165	-0.00293	0.0046	-0.00291	-0.00931	-0.00595	-0.00551	-0.01078	-0.01704	-0.02077	-0.01777	-0.00983	-0.00488	-0.00821	-0.01087	-0.01188	-0.01489	-0.021	-0.02859
0.10602	0.02207	0.03925	0.02877	0.01024	0.00258	-0.00205	-0.0132	-0.03083	-0.04374	-0.05321	-0.06883	-0.0776	-0.06935	-0.04433	-0.00879	0.01615	0.02106	0.01625	0.01117	0.00327	-0.00781	-0.01067	-0.000227	0.00479	-0.00752	-0.02459	-0.03048	-0.02873	-0.02827	-0.02548	-0.01633	-0.00263	0.00498	-0.00268	-0.00925	-0.00593	-0.00541	-0.01058	-0.01683	-0.02066	-0.01772	-0.00985	-0.00491	-0.00813	-0.01074	-0.01178	-0.01479	-0.0209	-0.02853
0.10621	0.02225	0.03967	0.02935	0.01085	0.00306	-0.00183	-0.01316	-0.03081	-0.04374	-0.05329	-0.06891	-0.07763	-0.06936	-0.04428	-0.0086	0.01639	0.02118	0.01626	0.01126	0.0034	-0.00789	-0.01089	-0.000210921	0.00507	-0.00735	-0.02461	-0.03046	-0.02867	-0.02823	-0.0254	-0.01616	-0.00232	0.00535	-0.00244	-0.00919	-0.00591	-0.00532	-0.01037	-0.01662	-0.02054	-0.01769	-0.00988	-0.00495	-0.00805	-0.01061	-0.01169	-0.01469	-0.02079	-0.02847
0.10639	0.02243	0.04008	0.02992	0.01145	0.00354	-0.0016	-0.01311	-0.0308	-0.04375	-0.05336	-0.06899	-0.07764	-0.06936	-0.04421	-0.00841	0.01662	0.02129	0.01626	0.01136	0.00353	-0.00796	-0.01112	-0.000195237	0.00535	-0.00718	-0.02462	-0.03044	-0.0286	-0.02819	-0.02532	-0.01599	-0.00202	0.00573	-0.00221	-0.00914	-0.0059	-0.00522	-0.01016	-0.01641	-0.02042	-0.01765	-0.00991	-0.00498	-0.00797	-0.01049	-0.01159	-0.01459	-0.02068	-0.02839
0.10658	0.02261	0.04049	0.03048	0.01206	0.00403	-0.00138	-0.01307	-0.03079	-0.04375	-0.05343	-0.06905	-0.07765	-0.06935	-0.04413	-0.00822	0.01686	0.0214	0.01627	0.01145	0.00365	-0.00804	-0.01134	-0.000179926	0.00564	-0.007	-0.02463	-0.03041	-0.02853	-0.02814	-0.02523	-0.01582	-0.00172	0.0061	-0.00198	-0.00908	-0.00588	-0.00513	-0.00996	-0.0162	-0.02031	-0.01762	-0.00995	-0.00501	-0.0079	-0.01037	-0.01149	-0.01449	-0.02057	-0.02831
0.10676	0.02278	0.0409	0.03105	0.01267	0.00451	-0.00116	-0.01304	-0.03079	-0.04376	-0.0535	-0.06911	-0.07764	-0.06932	-0.04405	-0.00803	0.0171	0.02151	0.01627	0.01154	0.00377	-0.00813	-0.01157	-0.00016497	0.00593	-0.00682	-0.02464	-0.03038	-0.02846	-0.0281	-0.02515	-0.01564	-0.00142	0.00646	-0.00175	-0.00902	-0.00586	-0.00504	-0.00976	-0.016	-0.02019	-0.01758	-0.00998	-0.00504	-0.00783	-0.01025	-0.0114	-0.01439	-0.02045	-0.02823
0.10694	0.02295	0.04129	0.0316	0.01328	0.00499	-0.000940061	-0.01301	-0.03079	-0.04376	-0.05356	-0.06916	-0.07762	-0.06929	-0.04395	-0.00783	0.01733	0.02163	0.01628	0.01162	0.00389	-0.00822	-0.01181	-0.000150346	0.00622	-0.00664	-0.02465	-0.03034	-0.02839	-0.02804	-0.02506	-0.01547	-0.00112	0.00682	-0.00152	-0.00896	-0.00585	-0.00495	-0.00956	-0.01579	-0.02008	-0.01755	-0.01002	-0.00508	-0.00775	-0.01014	-0.0113	-0.01429	-0.02034	-0.02813
0.10713	0.02312	0.04169	0.03215	0.01388	0.00548	-0.000721639	-0.01298	-0.03079	-0.04376	-0.05361	-0.06921	-0.07759	-0.06924	-0.04385	-0.00763	0.01757	0.02174	0.01628	0.0117	0.004	-0.00831	-0.01204	-0.000136037	0.00652	-0.00645	-0.02466	-0.0303	-0.02831	-0.02799	-0.02497	-0.0153	-0.000827394	0.00718	-0.0013	-0.0089	-0.00583	-0.00486	-0.00936	-0.01559	-0.01997	-0.01753	-0.01006	-0.00511	-0.00768	-0.01002	-0.01121	-0.01419	-0.02022	-0.02803
0.10731	0.02329	0.04207	0.0327	0.01448	0.00596	-0.000504755	-0.01296	-0.03079	-0.04376	-0.05367	-0.06924	-0.07756	-0.06918	-0.04374	-0.00743	0.01781	0.02185	0.01628	0.01178	0.00411	-0.00841	-0.01228	-0.00012202	0.00681	-0.00627	-0.02466	-0.03026	-0.02822	-0.02793	-0.02488	-0.01513	-0.000536185	0.00754	-0.00107	-0.00884	-0.00582	-0.00477	-0.00916	-0.01538	-0.01985	-0.0175	-0.0101	-0.00515	-0.00762	-0.00991	-0.01112	-0.01409	-0.0201	-0.02792
0.1075	0.02345	0.04245	0.03324	0.01508	0.00645	-0.000289459	-0.01294	-0.0308	-0.04376	-0.05371	-0.06927	-0.07751	-0.06911	-0.04363	-0.00723	0.01804	0.02197	0.01628	0.01185	0.00421	-0.00851	-0.01253	-0.000108278	0.00711	-0.00608	-0.02465	-0.03021	-0.02814	-0.02788	-0.02478	-0.01496	-0.000248474	0.00788	-0.000855221	-0.00879	-0.0058	-0.00468	-0.00897	-0.01518	-0.01974	-0.01748	-0.01015	-0.00518	-0.00755	-0.00981	-0.01104	-0.014	-0.01997	-0.02781
0.10768	0.02361	0.04283	0.03378	0.01568	0.00693	-7.58026e-05	-0.01293	-0.03081	-0.04375	-0.05375	-0.06929	-0.07745	-0.06902	-0.0435	-0.00702	0.01828	0.02208	0.01628	0.01192	0.0043	-0.00862	-0.01277	-9.47884e-05	0.00742	-0.00589	-0.02465	-0.03016	-0.02805	-0.02781	-0.02469	-0.01479	3.53327e-05	0.00823	-0.000638416	-0.00873	-0.00579	-0.00459	-0.00877	-0.01498	-0.01963	-0.01746	-0.0102	-0.00522	-0.00749	-0.0097	-0.01095	-0.0139	-0.01985	-0.02769
0.10787	0.02376	0.0432	0.03431	0.01627	0.00742	0.000136164	-0.01292	-0.03083	-0.04375	-0.05379	-0.0693	-0.07738	-0.06893	-0.04337	-0.00682	0.01852	0.0222	0.01628	0.01199	0.00439	-0.00873	-0.01302	-8.15324e-05	0.00772	-0.0057	-0.02464	-0.0301	-0.02795	-0.02775	-0.02459	-0.01463	0.000314828	0.00857	-0.000424753	-0.00867	-0.00577	-0.00451	-0.00858	-0.01478	-0.01952	-0.01744	-0.01025	-0.00526	-0.00742	-0.0096	-0.01087	-0.0138	-0.01973	-0.02756
0.10805	0.02392	0.04356	0.03484	0.01686	0.0079	0.000346389	-0.01292	-0.03085	-0.04374	-0.05382	-0.0693	-0.0773	-0.06883	-0.04322	-0.00661	0.01875	0.02231	0.01628	0.01205	0.00448	-0.00884	-0.01327	-6.84901e-05	0.00802	-0.00551	-0.02463	-0.03004	-0.02786	-0.02768	-0.0245	-0.01446	0.000589616	0.0089	-0.000214449	-0.00862	-0.00576	-0.00442	-0.00839	-0.01458	-0.01941	-0.01743	-0.0103	-0.0053	-0.00736	-0.0095	-0.01079	-0.01371	-0.0196	-0.02743
0.10824	0.02406	0.04392	0.03536	0.01745	0.00838	0.000554818	-0.01292	-0.03087	-0.04374	-0.05385	-0.0693	-0.07721	-0.06871	-0.04308	-0.0064	0.01899	0.02243	0.01627	0.0121	0.00455	-0.00896	-0.01352	-5.56431e-05	0.00833	-0.00531	-0.02461	-0.02997	-0.02776	-0.02761	-0.0244	-0.0143	0.000859347	0.00922	-7.69932e-06	-0.00856	-0.00574	-0.00434	-0.0082	-0.01438	-0.01931	-0.01742	-0.01035	-0.00534	-0.0073	-0.0094	-0.01071	-0.01361	-0.01947	-0.02729
0.10842	0.02421	0.04427	0.03587	0.01803	0.00887	0.000761396	-0.01293	-0.03089	-0.04373	-0.05387	-0.06928	-0.07711	-0.06859	-0.04292	-0.00619	0.01923	0.02254	0.01626	0.01215	0.00462	-0.00909	-0.01378	-4.29738e-05	0.00864	-0.00511	-0.02459	-0.0299	-0.02766	-0.02754	-0.0243	-0.01414	0.00112	0.00954	0.000195305	-0.00851	-0.00573	-0.00425	-0.00801	-0.01418	-0.0192	-0.01741	-0.01041	-0.00538	-0.00725	-0.00931	-0.01063	-0.01352	-0.01935	-0.02714
0.10861	0.02435	0.04461	0.03637	0.01861	0.00935	0.000966067	-0.01294	-0.03092	-0.04372	-0.05389	-0.06926	-0.077	-0.06845	-0.04276	-0.00598	0.01946	0.02266	0.01625	0.01219	0.00469	-0.00921	-0.01404	-3.04641e-05	0.00895	-0.00492	-0.02457	-0.02982	-0.02755	-0.02747	-0.02421	-0.01398	0.00138	0.00985	0.000394373	-0.00845	-0.00572	-0.00417	-0.00783	-0.01399	-0.01909	-0.0174	-0.01047	-0.00542	-0.00719	-0.00922	-0.01055	-0.01343	-0.01922	-0.027
0.10879	0.02449	0.04495	0.03687	0.01919	0.00983	0.00117	-0.01296	-0.03095	-0.04371	-0.0539	-0.06923	-0.07688	-0.06831	-0.04258	-0.00576	0.0197	0.02277	0.01624	0.01223	0.00474	-0.00935	-0.01429	-1.80963e-05	0.00926	-0.00472	-0.02454	-0.02974	-0.02745	-0.0274	-0.02411	-0.01383	0.00163	0.01016	0.000589315	-0.0084	-0.0057	-0.00409	-0.00764	-0.01379	-0.01899	-0.0174	-0.01053	-0.00546	-0.00714	-0.00913	-0.01048	-0.01334	-0.0191	-0.02684
0.10898	0.02462	0.04528	0.03737	0.01976	0.0103	0.00137	-0.01298	-0.03099	-0.04369	-0.0539	-0.06918	-0.07675	-0.06815	-0.04241	-0.00555	0.01993	0.02289	0.01623	0.01226	0.0048	-0.00948	-0.01455	-5.85244e-06	0.00957	-0.00452	-0.02451	-0.02965	-0.02734	-0.02732	-0.02401	-0.01367	0.00188	0.01045	0.00077994	-0.00834	-0.00568	-0.00401	-0.00746	-0.0136	-0.01889	-0.01739	-0.01059	-0.0055	-0.00709	-0.00905	-0.01041	-0.01325	-0.01897	-0.02668
0.10916	0.02476	0.0456	0.03786	0.02033	0.01078	0.00157	-0.013	-0.03102	-0.04368	-0.0539	-0.06914	-0.07661	-0.06799	-0.04222	-0.00533	0.02016	0.023	0.01621	0.01229	0.00484	-0.00962	-0.01481	6.2853e-06	0.00989	-0.00431	-0.02448	-0.02956	-0.02722	-0.02724	-0.02391	-0.01352	0.00212	0.01074	0.000966057	-0.00829	-0.00567	-0.00393	-0.00728	-0.01341	-0.01878	-0.01739	-0.01066	-0.00554	-0.00704	-0.00897	-0.01034	-0.01316	-0.01884	-0.02652
0.10935	0.02489	0.04592	0.03834	0.02089	0.01125	0.00176	-0.01303	-0.03106	-0.04367	-0.0539	-0.06908	-0.07647	-0.06781	-0.04203	-0.00512	0.0204	0.02311	0.01619	0.01231	0.00488	-0.00976	-0.01508	1.83348e-05	0.0102	-0.00411	-0.02444	-0.02947	-0.02711	-0.02716	-0.02381	-0.01338	0.00235	0.01102	0.00115	-0.00824	-0.00565	-0.00385	-0.00711	-0.01322	-0.01868	-0.0174	-0.01073	-0.00559	-0.00699	-0.00889	-0.01027	-0.01308	-0.01872	-0.02635
0.10953	0.02501	0.04623	0.03881	0.02144	0.01172	0.00196	-0.01307	-0.03111	-0.04365	-0.05388	-0.06901	-0.07631	-0.06763	-0.04184	-0.0049	0.02063	0.02323	0.01617	0.01232	0.00491	-0.00991	-0.01534	3.03139e-05	0.01051	-0.00391	-0.02439	-0.02937	-0.02699	-0.02708	-0.02371	-0.01324	0.00258	0.01129	0.00132	-0.00818	-0.00563	-0.00377	-0.00693	-0.01303	-0.01858	-0.0174	-0.0108	-0.00563	-0.00695	-0.00881	-0.0102	-0.013	-0.01859	-0.02618
0.10972	0.02513	0.04653	0.03928	0.022	0.01219	0.00215	-0.0131	-0.03115	-0.04363	-0.05387	-0.06894	-0.07614	-0.06744	-0.04163	-0.00468	0.02086	0.02334	0.01615	0.01233	0.00493	-0.01005	-0.0156	4.22405e-05	0.01083	-0.0037	-0.02434	-0.02926	-0.02687	-0.027	-0.02362	-0.0131	0.00279	0.01155	0.0015	-0.00813	-0.00562	-0.00369	-0.00676	-0.01284	-0.01847	-0.01741	-0.01087	-0.00568	-0.0069	-0.00874	-0.01014	-0.01292	-0.01847	-0.026
0.1099	0.02525	0.04683	0.03973	0.02254	0.01266	0.00234	-0.01315	-0.0312	-0.04362	-0.05385	-0.06885	-0.07597	-0.06724	-0.04143	-0.00446	0.02109	0.02346	0.01612	0.01232	0.00494	-0.01021	-0.01586	5.41325e-05	0.01114	-0.00349	-0.02429	-0.02915	-0.02675	-0.02691	-0.02352	-0.01297	0.003	0.01181	0.00166	-0.00808	-0.0056	-0.00362	-0.00659	-0.01265	-0.01837	-0.01741	-0.01094	-0.00572	-0.00686	-0.00867	-0.01008	-0.01284	-0.01835	-0.02583
0.11008	0.02537	0.04712	0.04019	0.02308	0.01312	0.00253	-0.01319	-0.03125	-0.0436	-0.05382	-0.06876	-0.07578	-0.06703	-0.04121	-0.00425	0.02132	0.02357	0.01609	0.01232	0.00495	-0.01036	-0.01613	6.60074e-05	0.01145	-0.00328	-0.02423	-0.02903	-0.02662	-0.02683	-0.02342	-0.01284	0.0032	0.01205	0.00182	-0.00803	-0.00558	-0.00354	-0.00642	-0.01246	-0.01827	-0.01742	-0.01102	-0.00577	-0.00683	-0.00861	-0.01002	-0.01277	-0.01823	-0.02564
0.11027	0.02548	0.04741	0.04063	0.02361	0.01358	0.00271	-0.01324	-0.03131	-0.04358	-0.05379	-0.06866	-0.07559	-0.06681	-0.04099	-0.00403	0.02155	0.02368	0.01606	0.0123	0.00495	-0.01052	-0.01639	7.78826e-05	0.01177	-0.00307	-0.02417	-0.02891	-0.02649	-0.02674	-0.02333	-0.01271	0.0034	0.01228	0.00198	-0.00798	-0.00556	-0.00346	-0.00625	-0.01228	-0.01817	-0.01744	-0.0111	-0.00582	-0.00679	-0.00855	-0.00997	-0.01269	-0.01811	-0.02546
0.11045	0.02559	0.04768	0.04107	0.02414	0.01404	0.0029	-0.01329	-0.03136	-0.04356	-0.05375	-0.06855	-0.07538	-0.06658	-0.04077	-0.00381	0.02177	0.0238	0.01603	0.01228	0.00494	-0.01068	-0.01665	8.97748e-05	0.01208	-0.00286	-0.0241	-0.02878	-0.02636	-0.02665	-0.02323	-0.01259	0.00358	0.0125	0.00213	-0.00793	-0.00554	-0.00339	-0.00609	-0.01209	-0.01807	-0.01745	-0.01118	-0.00587	-0.00676	-0.00849	-0.00992	-0.01263	-0.018	-0.02527
0.11064	0.02569	0.04796	0.0415	0.02466	0.01449	0.00308	-0.01335	-0.03142	-0.04354	-0.0537	-0.06843	-0.07517	-0.06635	-0.04054	-0.00359	0.022	0.02391	0.01599	0.01225	0.00493	-0.01085	-0.01691	0.000101701	0.01239	-0.00265	-0.02403	-0.02865	-0.02623	-0.02656	-0.02314	-0.01248	0.00375	0.01271	0.00227	-0.00788	-0.00552	-0.00332	-0.00592	-0.01191	-0.01797	-0.01747	-0.01126	-0.00591	-0.00673	-0.00843	-0.00987	-0.01256	-0.01789	-0.02508
0.11082	0.02579	0.04822	0.04192	0.02518	0.01494	0.00325	-0.01341	-0.03149	-0.04351	-0.05365	-0.06831	-0.07495	-0.0661	-0.0403	-0.00337	0.02223	0.02402	0.01594	0.01221	0.0049	-0.01101	-0.01717	0.000113678	0.0127	-0.00244	-0.02395	-0.02851	-0.02609	-0.02647	-0.02304	-0.01237	0.00392	0.01291	0.00241	-0.00783	-0.00549	-0.00324	-0.00576	-0.01173	-0.01787	-0.01748	-0.01134	-0.00596	-0.0067	-0.00838	-0.00982	-0.0125	-0.01778	-0.02489
0.11101	0.02589	0.04848	0.04234	0.02569	0.01539	0.00343	-0.01347	-0.03155	-0.04349	-0.0536	-0.06817	-0.07473	-0.06585	-0.04006	-0.00315	0.02245	0.02413	0.0159	0.01216	0.00487	-0.01118	-0.01743	0.000125723	0.01301	-0.00222	-0.02387	-0.02837	-0.02595	-0.02638	-0.02295	-0.01226	0.00407	0.0131	0.00254	-0.00778	-0.00547	-0.00317	-0.00561	-0.01155	-0.01777	-0.0175	-0.01142	-0.00601	-0.00667	-0.00833	-0.00977	-0.01244	-0.01767	-0.0247
0.11119	0.02599	0.04873	0.04275	0.02619	0.01583	0.0036	-0.01354	-0.03162	-0.04346	-0.05354	-0.06803	-0.07449	-0.0656	-0.03982	-0.00293	0.02267	0.02425	0.01585	0.01211	0.00484	-0.01135	-0.01769	0.000137853	0.01332	-0.00201	-0.02378	-0.02822	-0.02581	-0.02629	-0.02286	-0.01216	0.00422	0.01328	0.00267	-0.00773	-0.00544	-0.0031	-0.00545	-0.01137	-0.01766	-0.01752	-0.0115	-0.00606	-0.00664	-0.00828	-0.00973	-0.01238	-0.01756	-0.0245
0.11138	0.02608	0.04898	0.04315	0.02669	0.01626	0.00377	-0.01361	-0.03169	-0.04344	-0.05347	-0.06787	-0.07425	-0.06533	-0.03957	-0.00271	0.0229	0.02436	0.0158	0.01205	0.00479	-0.01152	-0.01794	0.000150085	0.01362	-0.00179	-0.02368	-0.02807	-0.02567	-0.0262	-0.02277	-0.01206	0.00436	0.01345	0.00279	-0.00768	-0.00541	-0.00302	-0.0053	-0.01119	-0.01756	-0.01754	-0.01159	-0.00611	-0.00662	-0.00823	-0.00969	-0.01233	-0.01746	-0.0243
0.11156	0.02617	0.04922	0.04355	0.02717	0.0167	0.00394	-0.01369	-0.03176	-0.04341	-0.0534	-0.06771	-0.07399	-0.06506	-0.03932	-0.00249	0.02312	0.02447	0.01574	0.01198	0.00474	-0.0117	-0.0182	0.000162435	0.01393	-0.00158	-0.02358	-0.02791	-0.02553	-0.0261	-0.02268	-0.01197	0.00448	0.0136	0.0029	-0.00763	-0.00539	-0.00295	-0.00514	-0.01101	-0.01746	-0.01756	-0.01167	-0.00616	-0.0066	-0.00819	-0.00965	-0.01228	-0.01737	-0.02411
0.11175	0.02626	0.04946	0.04393	0.02766	0.01712	0.0041	-0.01376	-0.03183	-0.04338	-0.05332	-0.06754	-0.07374	-0.06479	-0.03906	-0.00227	0.02334	0.02458	0.01568	0.0119	0.00468	-0.01187	-0.01845	0.000174921	0.01423	-0.00136	-0.02348	-0.02775	-0.02538	-0.02601	-0.0226	-0.01189	0.0046	0.01375	0.00301	-0.00758	-0.00536	-0.00288	-0.005	-0.01083	-0.01736	-0.01758	-0.01176	-0.00621	-0.00658	-0.00815	-0.00962	-0.01223	-0.01727	-0.02391
0.11193	0.02635	0.04968	0.04431	0.02813	0.01755	0.00426	-0.01384	-0.0319	-0.04335	-0.05324	-0.06737	-0.07347	-0.0645	-0.03881	-0.00205	0.02356	0.02469	0.01562	0.01181	0.00461	-0.01205	-0.0187	0.000187559	0.01453	-0.00114	-0.02337	-0.02758	-0.02523	-0.02591	-0.02251	-0.01181	0.0047	0.01388	0.00311	-0.00754	-0.00532	-0.00281	-0.00485	-0.01066	-0.01726	-0.0176	-0.01184	-0.00626	-0.00657	-0.00812	-0.00959	-0.01219	-0.01718	-0.02371
0.11212	0.02643	0.04991	0.04469	0.0286	0.01797	0.00442	-0.01392	-0.03198	-0.04332	-0.05315	-0.06718	-0.07319	-0.06422	-0.03854	-0.00184	0.02378	0.0248	0.01555	0.01172	0.00454	-0.01223	-0.01895	0.000200366	0.01483	-0.000919155	-0.02325	-0.0274	-0.02508	-0.02581	-0.02243	-0.01173	0.0048	0.014	0.0032	-0.00749	-0.00529	-0.00274	-0.0047	-0.01048	-0.01715	-0.01762	-0.01193	-0.00632	-0.00655	-0.00809	-0.00956	-0.01216	-0.0171	-0.02351
0.1123	0.02651	0.05012	0.04505	0.02906	0.01838	0.00458	-0.01401	-0.03206	-0.04328	-0.05305	-0.06699	-0.07291	-0.06392	-0.03828	-0.00162	0.024	0.02491	0.01548	0.01162	0.00446	-0.01241	-0.01919	0.000213351	0.01513	-0.000698288	-0.02313	-0.02722	-0.02492	-0.02572	-0.02235	-0.01167	0.00488	0.0141	0.00329	-0.00744	-0.00525	-0.00267	-0.00456	-0.01031	-0.01705	-0.01764	-0.01201	-0.00637	-0.00654	-0.00806	-0.00953	-0.01212	-0.01702	-0.02332
0.11249	0.02658	0.05034	0.04541	0.02951	0.01879	0.00473	-0.0141	-0.03214	-0.04325	-0.05295	-0.06678	-0.07262	-0.06362	-0.03801	-0.0014	0.02422	0.02502	0.01541	0.01151	0.00437	-0.01259	-0.01943	0.000226524	0.01543	-0.000476547	-0.023	-0.02704	-0.02477	-0.02562	-0.02227	-0.0116	0.00496	0.0142	0.00337	-0.00739	-0.00522	-0.0026	-0.00442	-0.01013	-0.01694	-0.01766	-0.0121	-0.00642	-0.00653	-0.00803	-0.00951	-0.01209	-0.01694	-0.02312
0.11267	0.02665	0.05054	0.04576	0.02995	0.01919	0.00488	-0.01419	-0.03222	-0.04321	-0.05285	-0.06657	-0.07233	-0.06332	-0.03774	-0.00118	0.02443	0.02512	0.01533	0.01139	0.00428	-0.01277	-0.01967	0.000239892	0.01572	-0.00025396	-0.02286	-0.02685	-0.02461	-0.02552	-0.02219	-0.01155	0.00502	0.01428	0.00345	-0.00734	-0.00518	-0.00253	-0.00428	-0.00996	-0.01684	-0.01768	-0.01218	-0.00647	-0.00653	-0.00801	-0.00949	-0.01207	-0.01687	-0.02292
0.11286	0.02673	0.05074	0.04611	0.03039	0.01959	0.00503	-0.01428	-0.0323	-0.04318	-0.05274	-0.06635	-0.07203	-0.06301	-0.03746	-0.000964095	0.02465	0.02523	0.01525	0.01127	0.00418	-0.01295	-0.0199	0.000253466	0.01601	-3.05536e-05	-0.02272	-0.02665	-0.02445	-0.02542	-0.02211	-0.0115	0.00508	0.01436	0.00352	-0.00729	-0.00514	-0.00246	-0.00414	-0.00979	-0.01673	-0.0177	-0.01227	-0.00652	-0.00652	-0.00798	-0.00947	-0.01205	-0.0168	-0.02273
0.11304	0.02679	0.05094	0.04645	0.03082	0.01998	0.00517	-0.01437	-0.03239	-0.04314	-0.05262	-0.06613	-0.07172	-0.06269	-0.03718	-0.000746727	0.02487	0.02534	0.01517	0.01114	0.00407	-0.01313	-0.02014	0.000267254	0.01629	0.000193646	-0.02257	-0.02645	-0.02429	-0.02532	-0.02204	-0.01145	0.00512	0.01441	0.00358	-0.00724	-0.00509	-0.00239	-0.00401	-0.00962	-0.01662	-0.01772	-0.01235	-0.00657	-0.00652	-0.00797	-0.00945	-0.01203	-0.01674	-0.02253
0.11322	0.02686	0.05113	0.04678	0.03125	0.02037	0.00532	-0.01447	-0.03247	-0.0431	-0.0525	-0.06589	-0.0714	-0.06238	-0.0369	-0.000529608	0.02508	0.02545	0.01508	0.011	0.00396	-0.01331	-0.02036	0.000281264	0.01658	0.000418611	-0.02242	-0.02624	-0.02412	-0.02522	-0.02196	-0.01141	0.00515	0.01446	0.00364	-0.00719	-0.00505	-0.00232	-0.00388	-0.00944	-0.01652	-0.01773	-0.01243	-0.00662	-0.00652	-0.00795	-0.00944	-0.01202	-0.01668	-0.02234
0.11341	0.02692	0.05131	0.0471	0.03166	0.02075	0.00545	-0.01457	-0.03256	-0.04306	-0.05237	-0.06565	-0.07108	-0.06205	-0.03662	-0.000312736	0.0253	0.02556	0.01499	0.01086	0.00384	-0.01349	-0.02059	0.000295507	0.01685	0.000644316	-0.02226	-0.02603	-0.02396	-0.02512	-0.02189	-0.01138	0.00517	0.0145	0.00369	-0.00714	-0.005	-0.00225	-0.00375	-0.00928	-0.01641	-0.01775	-0.01251	-0.00667	-0.00652	-0.00794	-0.00943	-0.01201	-0.01663	-0.02215
0.11359	0.02698	0.0515	0.04742	0.03207	0.02112	0.00559	-0.01467	-0.03264	-0.04302	-0.05224	-0.0654	-0.07076	-0.06173	-0.03634	-9.61083e-05	0.02551	0.02566	0.01489	0.0107	0.00372	-0.01367	-0.0208	0.00030999	0.01713	0.000870734	-0.02209	-0.02582	-0.02379	-0.02502	-0.02182	-0.01135	0.00518	0.01452	0.00373	-0.00709	-0.00495	-0.00218	-0.00362	-0.00911	-0.0163	-0.01777	-0.01259	-0.00672	-0.00652	-0.00793	-0.00942	-0.012	-0.01658	-0.02196
0.11378	0.02704	0.05167	0.04774	0.03247	0.02149	0.00572	-0.01477	-0.03273	-0.04298	-0.05211	-0.06514	-0.07042	-0.0614	-0.03605	0.000120278	0.02573	0.02577	0.0148	0.01054	0.00359	-0.01385	-0.02102	0.000324723	0.0174	0.0011	-0.02192	-0.0256	-0.02362	-0.02492	-0.02175	-0.01133	0.00518	0.01453	0.00377	-0.00704	-0.0049	-0.00211	-0.00349	-0.00894	-0.01618	-0.01778	-0.01267	-0.00677	-0.00653	-0.00792	-0.00941	-0.012	-0.01654	-0.02178
0.11396	0.0271	0.05184	0.04804	0.03286	0.02185	0.00585	-0.01487	-0.03282	-0.04293	-0.05196	-0.06488	-0.07009	-0.06107	-0.03577	0.000336426	0.02594	0.02588	0.0147	0.01038	0.00345	-0.01403	-0.02123	0.000339715	0.01767	0.00133	-0.02174	-0.02537	-0.02345	-0.02481	-0.02169	-0.01131	0.00518	0.01453	0.0038	-0.00699	-0.00485	-0.00205	-0.00337	-0.00877	-0.01607	-0.01779	-0.01275	-0.00681	-0.00653	-0.00791	-0.00941	-0.01201	-0.01651	-0.02159
0.11415	0.02715	0.05201	0.04834	0.03325	0.02221	0.00598	-0.01497	-0.0329	-0.04288	-0.05182	-0.06461	-0.06974	-0.06073	-0.03548	0.000552341	0.02616	0.02598	0.01459	0.0102	0.00331	-0.01421	-0.02143	0.000354973	0.01794	0.00155	-0.02155	-0.02514	-0.02327	-0.02471	-0.02162	-0.0113	0.00516	0.01452	0.00383	-0.00694	-0.00479	-0.00198	-0.00325	-0.00861	-0.01596	-0.0178	-0.01282	-0.00686	-0.00654	-0.00791	-0.00941	-0.01202	-0.01648	-0.02141
0.11433	0.0272	0.05217	0.04863	0.03363	0.02256	0.0061	-0.01508	-0.03299	-0.04284	-0.05166	-0.06433	-0.06939	-0.06039	-0.03519	0.000768054	0.02637	0.02609	0.01449	0.01002	0.00317	-0.01438	-0.02163	0.000370505	0.0182	0.00178	-0.02136	-0.02491	-0.0231	-0.02461	-0.02156	-0.01129	0.00512	0.0145	0.00385	-0.00688	-0.00474	-0.00191	-0.00313	-0.00844	-0.01584	-0.01781	-0.0129	-0.00691	-0.00655	-0.00791	-0.00941	-0.01203	-0.01646	-0.02124
0.11452	0.02725	0.05233	0.04892	0.034	0.0229	0.00623	-0.01518	-0.03308	-0.04279	-0.05151	-0.06404	-0.06904	-0.06005	-0.0349	0.000983596	0.02659	0.0262	0.01438	0.00984	0.00302	-0.01456	-0.02182	0.000386314	0.01845	0.00201	-0.02116	-0.02467	-0.02292	-0.0245	-0.0215	-0.01129	0.00508	0.01446	0.00386	-0.00683	-0.00467	-0.00184	-0.00301	-0.00828	-0.01572	-0.01782	-0.01297	-0.00696	-0.00656	-0.00791	-0.00941	-0.01205	-0.01644	-0.02106
0.1147	0.0273	0.05248	0.0492	0.03436	0.02324	0.00634	-0.01529	-0.03316	-0.04274	-0.05134	-0.06375	-0.06868	-0.05971	-0.03461	0.0012	0.0268	0.02631	0.01427	0.00965	0.00286	-0.01473	-0.02201	0.000402406	0.01871	0.00224	-0.02096	-0.02442	-0.02274	-0.0244	-0.02144	-0.0113	0.00503	0.01441	0.00387	-0.00677	-0.00461	-0.00177	-0.0029	-0.00811	-0.01561	-0.01782	-0.01304	-0.007	-0.00658	-0.00791	-0.00942	-0.01207	-0.01643	-0.02089
0.11489	0.02735	0.05263	0.04948	0.03472	0.02357	0.00646	-0.01539	-0.03325	-0.04269	-0.05118	-0.06345	-0.06832	-0.05937	-0.03432	0.00141	0.02702	0.02642	0.01415	0.00945	0.00271	-0.0149	-0.0222	0.000418787	0.01895	0.00247	-0.02075	-0.02417	-0.02256	-0.02429	-0.02138	-0.01131	0.00497	0.01435	0.00388	-0.00672	-0.00455	-0.0017	-0.00278	-0.00795	-0.01549	-0.01783	-0.0131	-0.00705	-0.00659	-0.00791	-0.00943	-0.0121	-0.01642	-0.02072
0.11507	0.02739	0.05278	0.04975	0.03507	0.0239	0.00657	-0.0155	-0.03334	-0.04263	-0.051	-0.06314	-0.06796	-0.05902	-0.03403	0.00163	0.02723	0.02652	0.01404	0.00925	0.00254	-0.01507	-0.02237	0.000435462	0.0192	0.0027	-0.02053	-0.02392	-0.02238	-0.02419	-0.02133	-0.01132	0.0049	0.01428	0.00388	-0.00666	-0.00448	-0.00164	-0.00267	-0.00779	-0.01537	-0.01782	-0.01316	-0.00709	-0.00661	-0.00792	-0.00944	-0.01213	-0.01642	-0.02056
0.11526	0.02744	0.05292	0.05002	0.03541	0.02422	0.00668	-0.01561	-0.03342	-0.04258	-0.05083	-0.06283	-0.06759	-0.05868	-0.03374	0.00184	0.02745	0.02663	0.01392	0.00905	0.00238	-0.01523	-0.02254	0.000452436	0.01943	0.00293	-0.02031	-0.02366	-0.0222	-0.02408	-0.02127	-0.01134	0.00482	0.0142	0.00387	-0.0066	-0.00441	-0.00157	-0.00256	-0.00763	-0.01524	-0.01782	-0.01323	-0.00713	-0.00663	-0.00793	-0.00945	-0.01217	-0.01643	-0.0204
0.11544	0.02748	0.05305	0.05028	0.03575	0.02453	0.00679	-0.01571	-0.0335	-0.04252	-0.05065	-0.06251	-0.06721	-0.05833	-0.03345	0.00206	0.02766	0.02674	0.0138	0.00884	0.00221	-0.01539	-0.02271	0.000469714	0.01967	0.00316	-0.02008	-0.0234	-0.02201	-0.02398	-0.02122	-0.01137	0.00473	0.01411	0.00386	-0.00654	-0.00434	-0.0015	-0.00246	-0.00747	-0.01512	-0.01782	-0.01328	-0.00718	-0.00664	-0.00794	-0.00946	-0.01221	-0.01644	-0.02025
0.11563	0.02752	0.05319	0.05054	0.03608	0.02484	0.00689	-0.01582	-0.03359	-0.04246	-0.05046	-0.06219	-0.06684	-0.05798	-0.03315	0.00228	0.02788	0.02685	0.01368	0.00862	0.00204	-0.01555	-0.02287	0.000487302	0.0199	0.0034	-0.01985	-0.02314	-0.02183	-0.02387	-0.02117	-0.0114	0.00464	0.01401	0.00384	-0.00648	-0.00426	-0.00143	-0.00235	-0.00731	-0.01499	-0.01781	-0.01334	-0.00722	-0.00667	-0.00795	-0.00948	-0.01225	-0.01646	-0.0201
0.11581	0.02755	0.05332	0.05079	0.0364	0.02514	0.007	-0.01592	-0.03367	-0.0424	-0.05027	-0.06186	-0.06646	-0.05764	-0.03286	0.00249	0.0281	0.02697	0.01356	0.0084	0.00187	-0.0157	-0.02302	0.000505204	0.02012	0.00363	-0.01961	-0.02287	-0.02164	-0.02376	-0.02112	-0.01143	0.00453	0.0139	0.00382	-0.00641	-0.00418	-0.00136	-0.00225	-0.00716	-0.01487	-0.01779	-0.01339	-0.00726	-0.00669	-0.00797	-0.0095	-0.0123	-0.01648	-0.01995
0.116	0.02759	0.05345	0.05103	0.03672	0.02543	0.0071	-0.01603	-0.03375	-0.04234	-0.05008	-0.06152	-0.06607	-0.05729	-0.03257	0.00271	0.02832	0.02708	0.01344	0.00818	0.0017	-0.01585	-0.02316	0.000523427	0.02034	0.00386	-0.01936	-0.0226	-0.02145	-0.02366	-0.02107	-0.01147	0.00441	0.01378	0.00379	-0.00635	-0.0041	-0.0013	-0.00215	-0.007	-0.01474	-0.01778	-0.01344	-0.0073	-0.00671	-0.00798	-0.00952	-0.01235	-0.01651	-0.01981
0.11618	0.02762	0.05357	0.05128	0.03703	0.02572	0.00719	-0.01613	-0.03382	-0.04227	-0.04988	-0.06118	-0.06569	-0.05694	-0.03228	0.00292	0.02854	0.02719	0.01332	0.00796	0.00152	-0.016	-0.0233	0.000541972	0.02055	0.00409	-0.01911	-0.02233	-0.02126	-0.02355	-0.02102	-0.01152	0.00429	0.01365	0.00376	-0.00628	-0.00402	-0.00123	-0.00206	-0.00685	-0.01461	-0.01776	-0.01348	-0.00733	-0.00674	-0.008	-0.00954	-0.0124	-0.01655	-0.01967
0.11636	0.02766	0.05369	0.05152	0.03734	0.026	0.00729	-0.01623	-0.0339	-0.04221	-0.04968	-0.06083	-0.0653	-0.0566	-0.03199	0.00314	0.02876	0.0273	0.01319	0.00773	0.00135	-0.01614	-0.02343	0.000560836	0.02075	0.00432	-0.01886	-0.02205	-0.02107	-0.02344	-0.02098	-0.01157	0.00416	0.01351	0.00373	-0.00622	-0.00393	-0.00116	-0.00196	-0.0067	-0.01448	-0.01774	-0.01352	-0.00737	-0.00676	-0.00802	-0.00956	-0.01246	-0.01659	-0.01954
0.11655	0.02769	0.05381	0.05175	0.03764	0.02628	0.00738	-0.01633	-0.03397	-0.04214	-0.04948	-0.06048	-0.06491	-0.05625	-0.03171	0.00335	0.02899	0.02742	0.01307	0.0075	0.00117	-0.01628	-0.02355	0.000580011	0.02095	0.00455	-0.01859	-0.02177	-0.02088	-0.02333	-0.02093	-0.01162	0.00402	0.01336	0.00369	-0.00615	-0.00384	-0.00109	-0.00187	-0.00655	-0.01435	-0.01771	-0.01356	-0.00741	-0.00679	-0.00804	-0.00959	-0.01253	-0.01664	-0.01941
0.11673	0.02772	0.05393	0.05198	0.03793	0.02655	0.00747	-0.01643	-0.03404	-0.04207	-0.04927	-0.06013	-0.06452	-0.05591	-0.03142	0.00357	0.02921	0.02753	0.01295	0.00727	0.000994143	-0.01641	-0.02367	0.000599488	0.02115	0.00478	-0.01833	-0.02148	-0.02069	-0.02322	-0.02089	-0.01167	0.00387	0.0132	0.00365	-0.00607	-0.00375	-0.00103	-0.00178	-0.0064	-0.01422	-0.01768	-0.01359	-0.00744	-0.00682	-0.00806	-0.00961	-0.01259	-0.01669	-0.01929
0.11692	0.02775	0.05404	0.05221	0.03822	0.02681	0.00756	-0.01653	-0.03411	-0.042	-0.04906	-0.05976	-0.06413	-0.05557	-0.03114	0.00379	0.02944	0.02765	0.01282	0.00704	0.000817369	-0.01653	-0.02377	0.000619263	0.02134	0.00501	-0.01806	-0.0212	-0.0205	-0.02311	-0.02085	-0.01173	0.00371	0.01303	0.0036	-0.006	-0.00366	-0.000959192	-0.00169	-0.00626	-0.01409	-0.01765	-0.01362	-0.00747	-0.00685	-0.00808	-0.00964	-0.01266	-0.01675	-0.01917
0.1171	0.02777	0.05416	0.05243	0.03851	0.02707	0.00764	-0.01662	-0.03417	-0.04192	-0.04884	-0.0594	-0.06373	-0.05523	-0.03085	0.004	0.02967	0.02777	0.0127	0.00681	0.000641204	-0.01665	-0.02388	0.000639326	0.02152	0.00523	-0.01778	-0.02091	-0.02031	-0.023	-0.02081	-0.0118	0.00355	0.01286	0.00356	-0.00592	-0.00356	-0.000892239	-0.00161	-0.00611	-0.01395	-0.01761	-0.01365	-0.00751	-0.00688	-0.0081	-0.00966	-0.01274	-0.01681	-0.01906
0.11729	0.0278	0.05426	0.05266	0.03879	0.02733	0.00773	-0.01671	-0.03423	-0.04185	-0.04862	-0.05903	-0.06334	-0.05489	-0.03057	0.00422	0.0299	0.02789	0.01257	0.00657	0.000466074	-0.01677	-0.02397	0.000659671	0.0217	0.00546	-0.0175	-0.02062	-0.02011	-0.02289	-0.02077	-0.01187	0.00338	0.01268	0.0035	-0.00584	-0.00346	-0.000825514	-0.00153	-0.00597	-0.01382	-0.01757	-0.01367	-0.00754	-0.00691	-0.00812	-0.00969	-0.01281	-0.01688	-0.01895
0.11747	0.02783	0.05437	0.05288	0.03906	0.02758	0.00781	-0.0168	-0.03429	-0.04177	-0.0484	-0.05866	-0.06294	-0.05455	-0.03029	0.00444	0.03013	0.02801	0.01245	0.00634	0.000292403	-0.01688	-0.02405	0.00068029	0.02187	0.00568	-0.01721	-0.02033	-0.01992	-0.02278	-0.02074	-0.01194	0.0032	0.01249	0.00345	-0.00576	-0.00336	-0.000759047	-0.00145	-0.00583	-0.01368	-0.01753	-0.01368	-0.00757	-0.00694	-0.00815	-0.00972	-0.01289	-0.01696	-0.01885
0.11766	0.02785	0.05448	0.05309	0.03933	0.02782	0.00789	-0.01689	-0.03434	-0.04169	-0.04818	-0.05828	-0.06255	-0.05422	-0.03001	0.00466	0.03036	0.02814	0.01233	0.00611	0.000120615	-0.01698	-0.02413	0.000701177	0.02203	0.00591	-0.01693	-0.02004	-0.01972	-0.02267	-0.0207	-0.01201	0.00302	0.01229	0.00339	-0.00568	-0.00326	-0.000692863	-0.00137	-0.00569	-0.01355	-0.01748	-0.0137	-0.00759	-0.00697	-0.00817	-0.00975	-0.01297	-0.01703	-0.01875
0.11784	0.02788	0.05458	0.05331	0.0396	0.02806	0.00797	-0.01697	-0.03439	-0.0416	-0.04795	-0.0579	-0.06215	-0.05389	-0.02974	0.00488	0.0306	0.02826	0.01221	0.00587	-4.88672e-05	-0.01708	-0.0242	0.000722323	0.02219	0.00613	-0.01663	-0.01974	-0.01953	-0.02256	-0.02066	-0.01209	0.00283	0.01208	0.00333	-0.0056	-0.00315	-0.000626991	-0.0013	-0.00556	-0.01341	-0.01743	-0.0137	-0.00762	-0.00701	-0.00819	-0.00978	-0.01306	-0.01712	-0.01865
0.11803	0.0279	0.05468	0.05352	0.03986	0.02829	0.00805	-0.01705	-0.03444	-0.04152	-0.04772	-0.05752	-0.06175	-0.05356	-0.02946	0.00509	0.03083	0.02839	0.01209	0.00564	-0.000215618	-0.01717	-0.02426	0.000743722	0.02234	0.00635	-0.01634	-0.01945	-0.01934	-0.02245	-0.02063	-0.01217	0.00264	0.01187	0.00327	-0.00551	-0.00304	-0.000561458	-0.00123	-0.00543	-0.01327	-0.01737	-0.01371	-0.00765	-0.00704	-0.00822	-0.00981	-0.01314	-0.0172	-0.01857
0.11821	0.02792	0.05478	0.05373	0.04012	0.02852	0.00813	-0.01713	-0.03448	-0.04143	-0.04748	-0.05713	-0.06136	-0.05323	-0.02919	0.00531	0.03107	0.02852	0.01198	0.00541	-0.000379219	-0.01725	-0.02431	0.000765363	0.02248	0.00657	-0.01604	-0.01915	-0.01914	-0.02234	-0.0206	-0.01225	0.00244	0.01165	0.00321	-0.00542	-0.00293	-0.000496294	-0.00116	-0.0053	-0.01314	-0.01731	-0.0137	-0.00767	-0.00708	-0.00824	-0.00984	-0.01323	-0.0173	-0.01848
0.1184	0.02794	0.05488	0.05394	0.04038	0.02875	0.00821	-0.0172	-0.03451	-0.04133	-0.04725	-0.05674	-0.06096	-0.05291	-0.02892	0.00554	0.03132	0.02865	0.01186	0.00519	-0.000539269	-0.01732	-0.02435	0.00078722	0.02262	0.00679	-0.01573	-0.01885	-0.01895	-0.02223	-0.02057	-0.01234	0.00223	0.01143	0.00314	-0.00533	-0.00282	-0.000431539	-0.0011	-0.00517	-0.013	-0.01724	-0.0137	-0.00769	-0.00711	-0.00827	-0.00987	-0.01332	-0.01739	-0.01841
0.11858	0.02796	0.05498	0.05414	0.04063	0.02897	0.00828	-0.01727	-0.03454	-0.04124	-0.04701	-0.05635	-0.06057	-0.05259	-0.02866	0.00576	0.03156	0.02878	0.01175	0.00496	-0.000695374	-0.01739	-0.02439	0.000809265	0.02274	0.007	-0.01543	-0.01856	-0.01876	-0.02212	-0.02053	-0.01242	0.00202	0.0112	0.00308	-0.00523	-0.00271	-0.000367236	-0.00104	-0.00505	-0.01286	-0.01717	-0.01368	-0.00771	-0.00715	-0.00829	-0.0099	-0.01341	-0.01749	-0.01833
0.11877	0.02798	0.05507	0.05435	0.04088	0.02918	0.00836	-0.01733	-0.03457	-0.04114	-0.04676	-0.05596	-0.06017	-0.05228	-0.0284	0.00598	0.03181	0.02892	0.01165	0.00474	-0.000847138	-0.01745	-0.02441	0.000831467	0.02287	0.00722	-0.01512	-0.01826	-0.01856	-0.02201	-0.0205	-0.01251	0.0018	0.01097	0.00301	-0.00513	-0.00259	-0.000303429	-0.000976564	-0.00493	-0.01272	-0.0171	-0.01367	-0.00773	-0.00718	-0.00832	-0.00993	-0.0135	-0.0176	-0.01827
0.11895	0.028	0.05517	0.05455	0.04113	0.0294	0.00843	-0.01739	-0.03459	-0.04104	-0.04652	-0.05556	-0.05978	-0.05197	-0.02813	0.0062	0.03206	0.02906	0.01154	0.00452	-0.000994167	-0.0175	-0.02443	0.000853798	0.02298	0.00743	-0.01481	-0.01796	-0.01837	-0.0219	-0.02047	-0.01261	0.00158	0.01073	0.00294	-0.00503	-0.00247	-0.00024016	-0.000921098	-0.00481	-0.01258	-0.01702	-0.01365	-0.00775	-0.00722	-0.00834	-0.00996	-0.0136	-0.01771	-0.0182
0.11914	0.02802	0.05526	0.05476	0.04138	0.02961	0.00851	-0.01744	-0.0346	-0.04094	-0.04627	-0.05516	-0.05939	-0.05167	-0.02788	0.00643	0.03231	0.0292	0.01144	0.00431	-0.00114	-0.01754	-0.02444	0.000876229	0.02309	0.00763	-0.0145	-0.01767	-0.01818	-0.02179	-0.02044	-0.0127	0.00136	0.01049	0.00287	-0.00493	-0.00235	-0.000177473	-0.000868773	-0.0047	-0.01244	-0.01694	-0.01362	-0.00777	-0.00726	-0.00836	-0.00998	-0.01369	-0.01782	-0.01815
0.11932	0.02804	0.05536	0.05496	0.04162	0.02981	0.00858	-0.01749	-0.03461	-0.04083	-0.04602	-0.05476	-0.059	-0.05137	-0.02762	0.00665	0.03257	0.02934	0.01134	0.0041	-0.00127	-0.01757	-0.02444	0.000898731	0.02319	0.00784	-0.01419	-0.01737	-0.01799	-0.02168	-0.02042	-0.0128	0.00113	0.01024	0.0028	-0.00483	-0.00222	-0.000115411	-0.000819635	-0.00459	-0.0123	-0.01685	-0.01359	-0.00778	-0.00729	-0.00838	-0.01001	-0.01379	-0.01793	-0.01809
0.1195	0.02805	0.05545	0.05516	0.04186	0.03001	0.00866	-0.01753	-0.03461	-0.04072	-0.04577	-0.05436	-0.05861	-0.05107	-0.02737	0.00688	0.03283	0.02949	0.01125	0.00389	-0.0014	-0.0176	-0.02443	0.000921274	0.02328	0.00804	-0.01387	-0.01708	-0.0178	-0.02157	-0.02039	-0.0129	0.000899215	0.00999	0.00273	-0.00472	-0.0021	-5.40159e-05	-0.000773735	-0.00448	-0.01216	-0.01675	-0.01355	-0.00779	-0.00733	-0.00841	-0.01004	-0.01389	-0.01805	-0.01804
0.11969	0.02807	0.05554	0.05536	0.0421	0.03021	0.00874	-0.01757	-0.03461	-0.0406	-0.04552	-0.05396	-0.05822	-0.05078	-0.02712	0.00711	0.03309	0.02964	0.01116	0.00369	-0.00153	-0.01762	-0.02441	0.00094383	0.02337	0.00823	-0.01356	-0.01678	-0.01761	-0.02146	-0.02036	-0.013	0.000664679	0.00974	0.00266	-0.00461	-0.00197	6.66807e-06	-0.000731119	-0.00438	-0.01202	-0.01666	-0.01351	-0.0078	-0.00736	-0.00843	-0.01006	-0.01399	-0.01817	-0.018
0.11987	0.02809	0.05563	0.05556	0.04234	0.03041	0.00881	-0.0176	-0.0346	-0.04049	-0.04526	-0.05356	-0.05784	-0.05049	-0.02688	0.00734	0.03335	0.02979	0.01107	0.0035	-0.00164	-0.01762	-0.02438	0.000966369	0.02345	0.00843	-0.01324	-0.01649	-0.01742	-0.02135	-0.02033	-0.0131	0.000427264	0.00948	0.00259	-0.00449	-0.00184	6.65981e-05	-0.000691837	-0.00428	-0.01188	-0.01655	-0.01346	-0.00781	-0.0074	-0.00844	-0.01008	-0.01409	-0.0183	-0.01796
0.12006	0.0281	0.05572	0.05577	0.04258	0.03061	0.00889	-0.01762	-0.03458	-0.04036	-0.045	-0.05315	-0.05745	-0.05021	-0.02663	0.00757	0.03362	0.02995	0.01099	0.00331	-0.00175	-0.01762	-0.02434	0.000988862	0.02351	0.00862	-0.01293	-0.0162	-0.01724	-0.02124	-0.02031	-0.0132	0.000187269	0.00922	0.00252	-0.00438	-0.00171	0.000125731	-0.000655936	-0.00419	-0.01174	-0.01645	-0.0134	-0.00782	-0.00744	-0.00846	-0.0101	-0.01419	-0.01842	-0.01793
0.12024	0.02812	0.05581	0.05597	0.04282	0.0308	0.00897	-0.01764	-0.03456	-0.04024	-0.04474	-0.05275	-0.05708	-0.04994	-0.0264	0.0078	0.03389	0.03011	0.01092	0.00313	-0.00186	-0.01761	-0.0243	0.00101	0.02358	0.0088	-0.01261	-0.01591	-0.01706	-0.02113	-0.02028	-0.0133	-5.50114e-05	0.00896	0.00246	-0.00426	-0.00158	0.000184026	-0.00062346	-0.00409	-0.0116	-0.01633	-0.01334	-0.00782	-0.00747	-0.00848	-0.01012	-0.01428	-0.01855	-0.0179
0.12043	0.02813	0.0559	0.05617	0.04306	0.03099	0.00905	-0.01765	-0.03452	-0.04011	-0.04448	-0.05234	-0.0567	-0.04966	-0.02616	0.00803	0.03417	0.03027	0.01085	0.00296	-0.00195	-0.01759	-0.02424	0.00103	0.02363	0.00899	-0.01229	-0.01563	-0.01688	-0.02102	-0.02026	-0.01341	-0.000299307	0.0087	0.00239	-0.00414	-0.00144	0.000241448	-0.00059444	-0.00401	-0.01146	-0.01622	-0.01328	-0.00783	-0.0075	-0.00849	-0.01014	-0.01438	-0.01868	-0.01787
0.12061	0.02815	0.05599	0.05637	0.04329	0.03118	0.00914	-0.01765	-0.03448	-0.03997	-0.04422	-0.05193	-0.05632	-0.0494	-0.02593	0.00826	0.03445	0.03043	0.01079	0.00279	-0.00204	-0.01756	-0.02418	0.00106	0.02368	0.00916	-0.01198	-0.01535	-0.0167	-0.02091	-0.02023	-0.01351	-0.000545355	0.00843	0.00232	-0.00401	-0.00131	0.000297963	-0.000568899	-0.00392	-0.01132	-0.0161	-0.01321	-0.00783	-0.00754	-0.0085	-0.01016	-0.01448	-0.01882	-0.01785
0.1208	0.02816	0.05608	0.05657	0.04353	0.03137	0.00922	-0.01764	-0.03443	-0.03983	-0.04395	-0.05153	-0.05595	-0.04914	-0.0257	0.0085	0.03473	0.0306	0.01073	0.00263	-0.00212	-0.01752	-0.02411	0.00108	0.02371	0.00934	-0.01167	-0.01507	-0.01652	-0.0208	-0.02021	-0.01362	-0.000792891	0.00817	0.00226	-0.00389	-0.00117	0.000353539	-0.000546863	-0.00385	-0.01119	-0.01597	-0.01314	-0.00783	-0.00757	-0.00851	-0.01017	-0.01458	-0.01895	-0.01784
0.12098	0.02818	0.05617	0.05677	0.04377	0.03155	0.00931	-0.01763	-0.03438	-0.03969	-0.04368	-0.05112	-0.05559	-0.04889	-0.02548	0.00873	0.03501	0.03077	0.01068	0.00248	-0.00219	-0.01747	-0.02403	0.0011	0.02374	0.0095	-0.01135	-0.01479	-0.01634	-0.02069	-0.02019	-0.01373	-0.00104	0.0079	0.00219	-0.00376	-0.00104	0.000408142	-0.000528357	-0.00377	-0.01105	-0.01584	-0.01305	-0.00783	-0.0076	-0.00852	-0.01018	-0.01468	-0.01909	-0.01782
0.12117	0.02819	0.05626	0.05698	0.044	0.03174	0.0094	-0.01761	-0.03431	-0.03954	-0.04341	-0.05071	-0.05522	-0.04864	-0.02525	0.00897	0.0353	0.03095	0.01063	0.00234	-0.00225	-0.01741	-0.02394	0.00112	0.02376	0.00966	-0.01104	-0.01452	-0.01617	-0.02059	-0.02016	-0.01383	-0.00129	0.00763	0.00213	-0.00363	-0.000896657	0.000461739	-0.000513405	-0.0037	-0.01091	-0.0157	-0.01297	-0.00782	-0.00763	-0.00853	-0.01019	-0.01477	-0.01923	-0.01781
0.12135	0.02821	0.05635	0.05718	0.04424	0.03192	0.00949	-0.01758	-0.03424	-0.03939	-0.04314	-0.05031	-0.05486	-0.0484	-0.02504	0.00921	0.03559	0.03113	0.01059	0.00221	-0.0023	-0.01733	-0.02384	0.00114	0.02378	0.00982	-0.01074	-0.01425	-0.016	-0.02048	-0.02014	-0.01394	-0.00154	0.00737	0.00207	-0.00349	-0.000756896	0.000514298	-0.000502034	-0.00363	-0.01078	-0.01556	-0.01288	-0.00782	-0.00766	-0.00853	-0.0102	-0.01487	-0.01937	-0.01781
0.12154	0.02822	0.05643	0.05739	0.04447	0.03211	0.00958	-0.01754	-0.03415	-0.03923	-0.04286	-0.0499	-0.05451	-0.04816	-0.02482	0.00945	0.03589	0.03131	0.01056	0.00208	-0.00235	-0.01725	-0.02373	0.00116	0.02378	0.00997	-0.01043	-0.01399	-0.01584	-0.02037	-0.02012	-0.01405	-0.00179	0.0071	0.00201	-0.00335	-0.000616225	0.000565784	-0.000494266	-0.00357	-0.01064	-0.01542	-0.01278	-0.00781	-0.00769	-0.00853	-0.0102	-0.01497	-0.01951	-0.01781
0.12172	0.02824	0.05652	0.05759	0.04471	0.03229	0.00968	-0.0175	-0.03406	-0.03906	-0.04259	-0.04949	-0.05415	-0.04794	-0.02461	0.00969	0.03619	0.0315	0.01053	0.00197	-0.00238	-0.01716	-0.02361	0.00118	0.02377	0.01012	-0.01013	-0.01373	-0.01567	-0.02027	-0.02009	-0.01416	-0.00204	0.00683	0.00196	-0.00322	-0.000474741	0.000616165	-0.000490129	-0.00352	-0.01051	-0.01527	-0.01268	-0.0078	-0.00772	-0.00853	-0.0102	-0.01506	-0.01965	-0.01781
0.12191	0.02825	0.05661	0.0578	0.04495	0.03247	0.00978	-0.01745	-0.03396	-0.03889	-0.04231	-0.04909	-0.05381	-0.04771	-0.02441	0.00993	0.03649	0.03169	0.01051	0.00186	-0.0024	-0.01706	-0.02349	0.0012	0.02376	0.01026	-0.00983	-0.01347	-0.01551	-0.02016	-0.02007	-0.01427	-0.00229	0.00657	0.0019	-0.00307	-0.000332541	0.000665408	-0.000489646	-0.00347	-0.01038	-0.01512	-0.01257	-0.00779	-0.00774	-0.00853	-0.0102	-0.01515	-0.01979	-0.01782
0.12209	0.02827	0.0567	0.058	0.04519	0.03266	0.00988	-0.01738	-0.03385	-0.03872	-0.04202	-0.04868	-0.05346	-0.0475	-0.0242	0.01018	0.0368	0.03189	0.0105	0.00176	-0.00242	-0.01695	-0.02335	0.00122	0.02374	0.01039	-0.00953	-0.01322	-0.01536	-0.02006	-0.02005	-0.01438	-0.00255	0.00631	0.00185	-0.00293	-0.000189723	0.000713479	-0.000492843	-0.00342	-0.01025	-0.01496	-0.01246	-0.00778	-0.00777	-0.00852	-0.0102	-0.01524	-0.01993	-0.01782
0.12228	0.02828	0.05679	0.05821	0.04543	0.03284	0.00999	-0.01731	-0.03373	-0.03854	-0.04174	-0.04828	-0.05312	-0.04729	-0.02401	0.01042	0.03711	0.03209	0.0105	0.00168	-0.00242	-0.01683	-0.02321	0.00124	0.02371	0.01051	-0.00924	-0.01298	-0.01521	-0.01996	-0.02003	-0.01448	-0.0028	0.00604	0.0018	-0.00278	-4.63838e-05	0.000760349	-0.000499737	-0.00338	-0.01012	-0.0148	-0.01235	-0.00776	-0.00779	-0.00851	-0.01019	-0.01533	-0.02008	-0.01784
0.12246	0.02829	0.05688	0.05842	0.04567	0.03302	0.0101	-0.01723	-0.0336	-0.03835	-0.04146	-0.04787	-0.05279	-0.04708	-0.02381	0.01067	0.03742	0.03229	0.0105	0.0016	-0.00241	-0.01669	-0.02306	0.00126	0.02367	0.01063	-0.00896	-0.01274	-0.01506	-0.01986	-0.02001	-0.01459	-0.00304	0.00578	0.00176	-0.00264	9.7375e-05	0.000805998	-0.000510317	-0.00334	-0.00999	-0.01463	-0.01222	-0.00775	-0.00781	-0.0085	-0.01018	-0.01542	-0.02022	-0.01785
0.12264	0.02831	0.05697	0.05863	0.04591	0.03321	0.01022	-0.01714	-0.03346	-0.03816	-0.04117	-0.04747	-0.05246	-0.04689	-0.02362	0.01092	0.03774	0.0325	0.01051	0.00154	-0.0024	-0.01655	-0.0229	0.00127	0.02362	0.01074	-0.00867	-0.01251	-0.01491	-0.01976	-0.01998	-0.0147	-0.00329	0.00553	0.00171	-0.00248	0.000241452	0.000850413	-0.00052456	-0.00331	-0.00986	-0.01446	-0.0121	-0.00773	-0.00783	-0.00848	-0.01016	-0.0155	-0.02036	-0.01787
0.12283	0.02832	0.05706	0.05884	0.04616	0.03339	0.01034	-0.01703	-0.03331	-0.03796	-0.04088	-0.04707	-0.05213	-0.0467	-0.02343	0.01117	0.03806	0.03271	0.01053	0.00148	-0.00237	-0.0164	-0.02273	0.00129	0.02356	0.01085	-0.0084	-0.01228	-0.01477	-0.01966	-0.01996	-0.01481	-0.00354	0.00527	0.00167	-0.00233	0.000385744	0.000893577	-0.000542449	-0.00328	-0.00974	-0.01429	-0.01197	-0.00771	-0.00784	-0.00846	-0.01015	-0.01559	-0.02051	-0.01789
0.12301	0.02834	0.05715	0.05905	0.0464	0.03358	0.01046	-0.01692	-0.03315	-0.03775	-0.04058	-0.04667	-0.05181	-0.04651	-0.02325	0.01142	0.03839	0.03292	0.01056	0.00144	-0.00233	-0.01623	-0.02256	0.0013	0.02349	0.01094	-0.00812	-0.01206	-0.01463	-0.01956	-0.01994	-0.01491	-0.00379	0.00502	0.00164	-0.00218	0.00053015	0.000935476	-0.000563963	-0.00326	-0.00961	-0.01411	-0.01183	-0.00768	-0.00786	-0.00844	-0.01012	-0.01567	-0.02065	-0.01791
0.1232	0.02835	0.05724	0.05926	0.04665	0.03376	0.01059	-0.0168	-0.03298	-0.03754	-0.04029	-0.04627	-0.05149	-0.04634	-0.02307	0.01167	0.03871	0.03314	0.0106	0.0014	-0.00228	-0.01606	-0.02237	0.00132	0.02342	0.01103	-0.00786	-0.01185	-0.0145	-0.01947	-0.01992	-0.01502	-0.00403	0.00477	0.0016	-0.00202	0.000674569	0.000976094	-0.000589082	-0.00324	-0.00949	-0.01393	-0.01169	-0.00766	-0.00787	-0.00841	-0.0101	-0.01575	-0.02079	-0.01794
0.12338	0.02837	0.05733	0.05947	0.04689	0.03395	0.01072	-0.01667	-0.0328	-0.03732	-0.03999	-0.04587	-0.05118	-0.04617	-0.02289	0.01192	0.03904	0.03337	0.01064	0.00138	-0.00222	-0.01587	-0.02218	0.00133	0.02333	0.01111	-0.0076	-0.01164	-0.01437	-0.01937	-0.0199	-0.01512	-0.00427	0.00452	0.00157	-0.00186	0.000818897	0.00102	-0.000617787	-0.00323	-0.00937	-0.01374	-0.01155	-0.00763	-0.00788	-0.00838	-0.01007	-0.01583	-0.02093	-0.01797
0.12357	0.02838	0.05742	0.05968	0.04714	0.03414	0.01086	-0.01653	-0.03261	-0.0371	-0.03969	-0.04547	-0.05087	-0.046	-0.02272	0.01218	0.03938	0.03359	0.01069	0.00137	-0.00215	-0.01568	-0.02198	0.00134	0.02324	0.01119	-0.00734	-0.01144	-0.01425	-0.01928	-0.01988	-0.01523	-0.00451	0.00428	0.00155	-0.0017	0.000963033	0.00105	-0.000650057	-0.00322	-0.00925	-0.01355	-0.0114	-0.0076	-0.00789	-0.00835	-0.01004	-0.0159	-0.02108	-0.018
0.12375	0.0284	0.05751	0.0599	0.04739	0.03433	0.011	-0.01638	-0.03241	-0.03686	-0.03938	-0.04508	-0.05057	-0.04584	-0.02255	0.01243	0.03971	0.03383	0.01075	0.00137	-0.00207	-0.01547	-0.02177	0.00136	0.02314	0.01125	-0.0071	-0.01125	-0.01413	-0.01919	-0.01986	-0.01533	-0.00475	0.00404	0.00152	-0.00154	0.00111	0.00109	-0.000685872	-0.00321	-0.00913	-0.01336	-0.01124	-0.00757	-0.00789	-0.00831	-0.01001	-0.01598	-0.02122	-0.01803
0.12394	0.02841	0.0576	0.06011	0.04764	0.03452	0.01114	-0.01621	-0.03219	-0.03663	-0.03908	-0.04468	-0.05027	-0.04569	-0.02239	0.01269	0.04005	0.03406	0.01082	0.00138	-0.00198	-0.01526	-0.02156	0.00137	0.02303	0.01131	-0.00685	-0.01107	-0.01402	-0.0191	-0.01983	-0.01543	-0.00499	0.0038	0.0015	-0.00138	0.00125	0.00113	-0.000725213	-0.00322	-0.00902	-0.01317	-0.01108	-0.00754	-0.0079	-0.00827	-0.00997	-0.01605	-0.02136	-0.01806
0.12412	0.02843	0.05769	0.06033	0.04789	0.03472	0.0113	-0.01604	-0.03197	-0.03638	-0.03877	-0.04429	-0.04998	-0.04555	-0.02223	0.01294	0.04039	0.0343	0.0109	0.00141	-0.00188	-0.01504	-0.02133	0.00138	0.0229	0.01135	-0.00662	-0.01089	-0.01391	-0.01901	-0.01981	-0.01554	-0.00522	0.00357	0.00149	-0.00121	0.00139	0.00116	-0.000768059	-0.00322	-0.0089	-0.01297	-0.01092	-0.00751	-0.0079	-0.00822	-0.00993	-0.01612	-0.0215	-0.0181
0.12431	0.02845	0.05779	0.06054	0.04815	0.03491	0.01145	-0.01586	-0.03173	-0.03612	-0.03846	-0.04389	-0.04969	-0.04541	-0.02207	0.0132	0.04074	0.03454	0.01098	0.00144	-0.00177	-0.0148	-0.0211	0.00138	0.02277	0.01139	-0.0064	-0.01072	-0.01381	-0.01893	-0.01979	-0.01564	-0.00545	0.00334	0.00148	-0.00105	0.00154	0.00119	-0.000814381	-0.00323	-0.00879	-0.01277	-0.01076	-0.00747	-0.00789	-0.00817	-0.00988	-0.01619	-0.02164	-0.01813
0.12449	0.02846	0.05788	0.06076	0.0484	0.03511	0.01161	-0.01566	-0.03148	-0.03586	-0.03814	-0.0435	-0.04941	-0.04528	-0.02192	0.01346	0.04109	0.03479	0.01108	0.00149	-0.00164	-0.01456	-0.02087	0.00139	0.02263	0.01142	-0.00618	-0.01056	-0.01371	-0.01884	-0.01977	-0.01574	-0.00568	0.00312	0.00147	-0.000880659	0.00168	0.00122	-0.000864106	-0.00325	-0.00868	-0.01256	-0.01059	-0.00743	-0.00789	-0.00812	-0.00983	-0.01625	-0.02177	-0.01817
0.12468	0.02848	0.05797	0.06098	0.04866	0.0353	0.01178	-0.01546	-0.03122	-0.03559	-0.03782	-0.04311	-0.04913	-0.04516	-0.02177	0.01372	0.04144	0.03504	0.01118	0.00155	-0.00151	-0.01431	-0.02062	0.00139	0.02248	0.01144	-0.00597	-0.01041	-0.01362	-0.01876	-0.01975	-0.01584	-0.00591	0.0029	0.00146	-0.000712476	0.00182	0.00125	-0.000917151	-0.00327	-0.00857	-0.01235	-0.01041	-0.00739	-0.00788	-0.00806	-0.00978	-0.01632	-0.02191	-0.01821
0.12486	0.02849	0.05806	0.06119	0.04892	0.0355	0.01195	-0.01524	-0.03095	-0.03532	-0.0375	-0.04272	-0.04885	-0.04504	-0.02162	0.01398	0.04179	0.03529	0.01129	0.00162	-0.00136	-0.01404	-0.02037	0.0014	0.02233	0.01145	-0.00577	-0.01026	-0.01353	-0.01868	-0.01973	-0.01593	-0.00613	0.00268	0.00146	-0.000543319	0.00196	0.00128	-0.000973434	-0.0033	-0.00847	-0.01214	-0.01024	-0.00735	-0.00787	-0.008	-0.00973	-0.01638	-0.02205	-0.01825
0.12505	0.02851	0.05815	0.06141	0.04918	0.03571	0.01213	-0.01501	-0.03067	-0.03503	-0.03717	-0.04233	-0.04858	-0.04493	-0.02148	0.01424	0.04214	0.03555	0.01141	0.0017	-0.00121	-0.01377	-0.02012	0.0014	0.02216	0.01145	-0.00558	-0.01013	-0.01345	-0.0186	-0.01971	-0.01603	-0.00635	0.00247	0.00147	-0.000373312	0.0021	0.00131	-0.00103	-0.00333	-0.00836	-0.01193	-0.01006	-0.00731	-0.00785	-0.00794	-0.00967	-0.01644	-0.02218	-0.01829
0.12523	0.02853	0.05825	0.06163	0.04944	0.03591	0.01231	-0.01478	-0.03038	-0.03474	-0.03685	-0.04194	-0.04832	-0.04482	-0.02135	0.0145	0.0425	0.03581	0.01154	0.0018	-0.00104	-0.0135	-0.01986	0.0014	0.02198	0.01144	-0.00539	-0.01	-0.01338	-0.01853	-0.01969	-0.01612	-0.00657	0.00227	0.00147	-0.000202581	0.00223	0.00133	-0.0011	-0.00336	-0.00826	-0.01172	-0.00987	-0.00726	-0.00784	-0.00787	-0.00961	-0.01649	-0.02232	-0.01833
0.12542	0.02854	0.05834	0.06184	0.0497	0.03611	0.0125	-0.01453	-0.03007	-0.03444	-0.03651	-0.04155	-0.04806	-0.04472	-0.02121	0.01476	0.04286	0.03607	0.01167	0.0019	-0.000868522	-0.01321	-0.01959	0.0014	0.0218	0.01142	-0.00522	-0.00988	-0.01331	-0.01846	-0.01967	-0.01622	-0.00678	0.00207	0.00149	-3.12512e-05	0.00237	0.00136	-0.00116	-0.0034	-0.00816	-0.0115	-0.00969	-0.00722	-0.00782	-0.0078	-0.00954	-0.01655	-0.02245	-0.01837
0.1256	0.02856	0.05843	0.06206	0.04996	0.03632	0.0127	-0.01427	-0.02975	-0.03413	-0.03618	-0.04117	-0.04781	-0.04463	-0.02108	0.01502	0.04322	0.03634	0.01181	0.00202	-0.000683494	-0.01291	-0.01931	0.0014	0.02161	0.01139	-0.00505	-0.00977	-0.01324	-0.01838	-0.01964	-0.01631	-0.00699	0.00187	0.0015	0.000140553	0.00251	0.00138	-0.00123	-0.00345	-0.00806	-0.01128	-0.0095	-0.00717	-0.0078	-0.00772	-0.00948	-0.01661	-0.02258	-0.01842
0.12579	0.02858	0.05852	0.06228	0.05022	0.03653	0.01289	-0.014	-0.02942	-0.03381	-0.03584	-0.04078	-0.04755	-0.04454	-0.02096	0.01528	0.04358	0.03661	0.01197	0.00214	-0.000488836	-0.01261	-0.01904	0.0014	0.0214	0.01135	-0.00489	-0.00966	-0.01319	-0.01831	-0.01962	-0.0164	-0.0072	0.00168	0.00152	0.000312707	0.00264	0.0014	-0.0013	-0.00349	-0.00796	-0.01106	-0.0093	-0.00711	-0.00777	-0.00764	-0.00941	-0.01666	-0.02271	-0.01846
0.12597	0.0286	0.05862	0.06249	0.05048	0.03674	0.0131	-0.01372	-0.02908	-0.03348	-0.03549	-0.04039	-0.04731	-0.04446	-0.02083	0.01553	0.04394	0.03688	0.01212	0.00228	-0.000284708	-0.0123	-0.01875	0.00139	0.02119	0.01131	-0.00475	-0.00957	-0.01314	-0.01825	-0.0196	-0.01649	-0.0074	0.0015	0.00154	0.000485084	0.00277	0.00143	-0.00137	-0.00355	-0.00787	-0.01083	-0.00911	-0.00706	-0.00774	-0.00756	-0.00934	-0.01671	-0.02284	-0.01851
0.12615	0.02862	0.05871	0.06271	0.05074	0.03695	0.01331	-0.01343	-0.02873	-0.03315	-0.03514	-0.04001	-0.04706	-0.04439	-0.02072	0.01579	0.04431	0.03716	0.01229	0.00243	-7.12721e-05	-0.01198	-0.01846	0.00138	0.02097	0.01125	-0.00461	-0.00949	-0.01309	-0.01818	-0.01958	-0.01658	-0.0076	0.00132	0.00157	0.00065756	0.0029	0.00144	-0.00145	-0.0036	-0.00777	-0.01061	-0.00891	-0.00701	-0.00771	-0.00747	-0.00926	-0.01676	-0.02297	-0.01856
0.12634	0.02863	0.0588	0.06293	0.05101	0.03716	0.01352	-0.01312	-0.02837	-0.0328	-0.03479	-0.03962	-0.04683	-0.04432	-0.0206	0.01605	0.04467	0.03743	0.01247	0.00259	0.000151279	-0.01165	-0.01817	0.00137	0.02074	0.01118	-0.00448	-0.00941	-0.01305	-0.01812	-0.01956	-0.01667	-0.0078	0.00115	0.0016	0.00083001	0.00303	0.00146	-0.00153	-0.00366	-0.00768	-0.01038	-0.00871	-0.00695	-0.00767	-0.00738	-0.00919	-0.01681	-0.0231	-0.0186
0.12652	0.02865	0.05889	0.06314	0.05127	0.03738	0.01374	-0.01281	-0.02799	-0.03245	-0.03443	-0.03924	-0.04659	-0.04425	-0.02049	0.01631	0.04503	0.03771	0.01265	0.00276	0.000382616	-0.01132	-0.01787	0.00136	0.02051	0.0111	-0.00436	-0.00934	-0.01302	-0.01806	-0.01954	-0.01675	-0.00799	0.000979177	0.00164	0.001	0.00316	0.00148	-0.00161	-0.00372	-0.00759	-0.01015	-0.00851	-0.00689	-0.00764	-0.00729	-0.00911	-0.01686	-0.02323	-0.01865
0.12671	0.02867	0.05898	0.06335	0.05153	0.03759	0.01397	-0.01249	-0.0276	-0.03209	-0.03407	-0.03885	-0.04636	-0.04419	-0.02038	0.01657	0.0454	0.03799	0.01284	0.00294	0.000622377	-0.01098	-0.01757	0.00135	0.02026	0.01101	-0.00426	-0.00928	-0.01299	-0.01801	-0.01952	-0.01683	-0.00818	0.000817479	0.00167	0.00117	0.00329	0.0015	-0.0017	-0.00379	-0.0075	-0.00992	-0.0083	-0.00683	-0.00759	-0.00719	-0.00903	-0.01691	-0.02336	-0.0187
0.12689	0.02869	0.05907	0.06357	0.0518	0.03781	0.0142	-0.01215	-0.02721	-0.03172	-0.03371	-0.03846	-0.04613	-0.04414	-0.02028	0.01682	0.04576	0.03828	0.01303	0.00313	0.000870199	-0.01064	-0.01726	0.00134	0.02001	0.01091	-0.00416	-0.00923	-0.01297	-0.01795	-0.01949	-0.01692	-0.00837	0.000661524	0.00172	0.00135	0.00341	0.00151	-0.00178	-0.00386	-0.00742	-0.00969	-0.00809	-0.00676	-0.00755	-0.00709	-0.00894	-0.01696	-0.02348	-0.01874
0.12708	0.02871	0.05916	0.06378	0.05206	0.03803	0.01443	-0.01181	-0.0268	-0.03135	-0.03334	-0.03808	-0.04591	-0.04409	-0.02018	0.01708	0.04613	0.03856	0.01323	0.00333	0.00113	-0.01029	-0.01695	0.00132	0.01975	0.01079	-0.00407	-0.00919	-0.01295	-0.0179	-0.01947	-0.017	-0.00855	0.000511349	0.00176	0.00152	0.00353	0.00152	-0.00187	-0.00393	-0.00733	-0.00945	-0.00788	-0.0067	-0.0075	-0.00698	-0.00886	-0.01701	-0.02361	-0.01879
0.12726	0.02873	0.05926	0.06399	0.05232	0.03825	0.01467	-0.01145	-0.02637	-0.03096	-0.03296	-0.03769	-0.04569	-0.04405	-0.02008	0.01733	0.04649	0.03885	0.01344	0.00354	0.00139	-0.00993	-0.01664	0.0013	0.01948	0.01067	-0.00399	-0.00916	-0.01294	-0.01785	-0.01945	-0.01707	-0.00873	0.000366995	0.00181	0.00169	0.00365	0.00154	-0.00196	-0.00401	-0.00725	-0.00922	-0.00767	-0.00663	-0.00745	-0.00688	-0.00878	-0.01706	-0.02373	-0.01884
0.12745	0.02875	0.05935	0.0642	0.05258	0.03847	0.01492	-0.01109	-0.02594	-0.03056	-0.03258	-0.03731	-0.04547	-0.04401	-0.01999	0.01758	0.04685	0.03914	0.01366	0.00376	0.00166	-0.00957	-0.01632	0.00128	0.0192	0.01054	-0.00393	-0.00914	-0.01294	-0.0178	-0.01943	-0.01715	-0.0089	0.000228499	0.00187	0.00186	0.00377	0.00155	-0.00205	-0.00409	-0.00716	-0.00898	-0.00745	-0.00656	-0.0074	-0.00677	-0.00869	-0.01711	-0.02386	-0.01889
0.12763	0.02877	0.05943	0.0644	0.05284	0.03869	0.01517	-0.01071	-0.0255	-0.03016	-0.0322	-0.03692	-0.04525	-0.04397	-0.0199	0.01783	0.04722	0.03942	0.01388	0.00398	0.00193	-0.00921	-0.016	0.00126	0.01891	0.0104	-0.00387	-0.00912	-0.01294	-0.01776	-0.0194	-0.01722	-0.00907	9.59003e-05	0.00192	0.00203	0.00389	0.00156	-0.00214	-0.00417	-0.00708	-0.00874	-0.00724	-0.00649	-0.00734	-0.00665	-0.0086	-0.01716	-0.02399	-0.01894
0.12782	0.02879	0.05952	0.06461	0.0531	0.03891	0.01542	-0.01033	-0.02504	-0.02975	-0.03181	-0.03653	-0.04504	-0.04394	-0.01981	0.01808	0.04758	0.03971	0.01411	0.00422	0.00222	-0.00884	-0.01568	0.00124	0.01862	0.01025	-0.00382	-0.00912	-0.01295	-0.01772	-0.01938	-0.0173	-0.00924	-3.07624e-05	0.00198	0.00219	0.004	0.00157	-0.00224	-0.00425	-0.007	-0.0085	-0.00702	-0.00642	-0.00728	-0.00654	-0.00852	-0.01721	-0.02411	-0.01899
0.128	0.02881	0.05961	0.06481	0.05335	0.03913	0.01568	-0.00994	-0.02458	-0.02933	-0.03141	-0.03614	-0.04483	-0.04391	-0.01973	0.01833	0.04794	0.04	0.01434	0.00446	0.00251	-0.00847	-0.01536	0.00121	0.01832	0.01009	-0.00379	-0.00912	-0.01297	-0.01768	-0.01936	-0.01737	-0.0094	-0.00015145	0.00205	0.00236	0.00411	0.00158	-0.00233	-0.00434	-0.00692	-0.00826	-0.0068	-0.00635	-0.00722	-0.00642	-0.00843	-0.01726	-0.02424	-0.01904
0.12819	0.02883	0.0597	0.06501	0.05361	0.03935	0.01594	-0.00953	-0.0241	-0.0289	-0.03101	-0.03575	-0.04462	-0.04389	-0.01965	0.01858	0.04829	0.04029	0.01457	0.00471	0.0028	-0.00809	-0.01503	0.00119	0.01801	0.00992	-0.00376	-0.00913	-0.01299	-0.01764	-0.01933	-0.01744	-0.00956	-0.000266125	0.00212	0.00252	0.00422	0.00159	-0.00243	-0.00443	-0.00684	-0.00802	-0.00657	-0.00627	-0.00715	-0.0063	-0.00834	-0.01732	-0.02437	-0.0191
0.12837	0.02885	0.05979	0.0652	0.05386	0.03957	0.01621	-0.00912	-0.02362	-0.02846	-0.03061	-0.03536	-0.04441	-0.04387	-0.01957	0.01882	0.04865	0.04058	0.01482	0.00497	0.0031	-0.00771	-0.01471	0.00116	0.0177	0.00973	-0.00374	-0.00915	-0.01302	-0.01761	-0.01931	-0.0175	-0.00971	-0.000374754	0.00219	0.00269	0.00433	0.00159	-0.00253	-0.00451	-0.00677	-0.00778	-0.00635	-0.00619	-0.00708	-0.00618	-0.00826	-0.01737	-0.02449	-0.01915
0.12856	0.02888	0.05987	0.0654	0.05411	0.03979	0.01648	-0.0087	-0.02312	-0.02801	-0.0302	-0.03496	-0.04421	-0.04385	-0.01949	0.01906	0.049	0.04087	0.01506	0.00524	0.0034	-0.00733	-0.01438	0.00113	0.01738	0.00954	-0.00374	-0.00917	-0.01305	-0.01758	-0.01928	-0.01757	-0.00986	-0.000477329	0.00226	0.00285	0.00443	0.0016	-0.00263	-0.00461	-0.00669	-0.00753	-0.00613	-0.00611	-0.00701	-0.00606	-0.00817	-0.01743	-0.02462	-0.0192
0.12874	0.0289	0.05996	0.06559	0.05435	0.04001	0.01675	-0.00827	-0.02261	-0.02756	-0.02978	-0.03457	-0.04401	-0.04384	-0.01942	0.0193	0.04935	0.04116	0.01531	0.00551	0.00371	-0.00694	-0.01405	0.0011	0.01705	0.00934	-0.00374	-0.00921	-0.01309	-0.01755	-0.01926	-0.01763	-0.01	-0.00057385	0.00234	0.00301	0.00453	0.00161	-0.00273	-0.0047	-0.00661	-0.00729	-0.0059	-0.00603	-0.00694	-0.00593	-0.00808	-0.01749	-0.02475	-0.01925
0.12893	0.02892	0.06004	0.06578	0.05459	0.04023	0.01703	-0.00784	-0.0221	-0.0271	-0.02936	-0.03417	-0.0438	-0.04383	-0.01935	0.01953	0.0497	0.04144	0.01557	0.00579	0.00402	-0.00656	-0.01372	0.00106	0.01672	0.00913	-0.00376	-0.00925	-0.01313	-0.01752	-0.01923	-0.01769	-0.01014	-0.000664315	0.00242	0.00317	0.00463	0.00161	-0.00283	-0.00479	-0.00654	-0.00704	-0.00567	-0.00594	-0.00686	-0.00581	-0.008	-0.01755	-0.02488	-0.01931
0.12911	0.02894	0.06013	0.06596	0.05483	0.04044	0.01731	-0.00739	-0.02157	-0.02663	-0.02893	-0.03377	-0.0436	-0.04382	-0.01929	0.01976	0.05004	0.04173	0.01582	0.00607	0.00434	-0.00617	-0.01339	0.00103	0.01638	0.00891	-0.00378	-0.0093	-0.01318	-0.0175	-0.0192	-0.01774	-0.01028	-0.000748723	0.0025	0.00333	0.00473	0.00162	-0.00293	-0.00489	-0.00646	-0.0068	-0.00544	-0.00586	-0.00678	-0.00568	-0.00792	-0.01761	-0.02501	-0.01936
0.12929	0.02896	0.06021	0.06614	0.05507	0.04066	0.01759	-0.00694	-0.02104	-0.02615	-0.0285	-0.03337	-0.0434	-0.04381	-0.01923	0.01999	0.05038	0.04201	0.01608	0.00636	0.00466	-0.00578	-0.01306	0.000988346	0.01603	0.00868	-0.00381	-0.00936	-0.01324	-0.01748	-0.01917	-0.0178	-0.01041	-0.000827073	0.00259	0.00348	0.00482	0.00162	-0.00302	-0.00498	-0.00639	-0.00655	-0.00521	-0.00577	-0.0067	-0.00555	-0.00784	-0.01768	-0.02514	-0.01942
0.12948	0.02899	0.06029	0.06632	0.0553	0.04087	0.01787	-0.00649	-0.0205	-0.02566	-0.02806	-0.03296	-0.0432	-0.04381	-0.01917	0.02022	0.05072	0.04229	0.01635	0.00665	0.00498	-0.00539	-0.01273	0.000948811	0.01568	0.00844	-0.00386	-0.00943	-0.0133	-0.01746	-0.01914	-0.01785	-0.01054	-0.000899363	0.00268	0.00363	0.00491	0.00163	-0.00312	-0.00508	-0.00631	-0.0063	-0.00498	-0.00568	-0.00662	-0.00542	-0.00776	-0.01775	-0.02528	-0.01947
0.12966	0.02901	0.06037	0.06649	0.05552	0.04108	0.01815	-0.00602	-0.01994	-0.02517	-0.02762	-0.03255	-0.043	-0.04381	-0.01911	0.02044	0.05105	0.04257	0.01661	0.00695	0.0053	-0.005	-0.01239	0.00090754	0.01533	0.0082	-0.00391	-0.0095	-0.01337	-0.01744	-0.01911	-0.0179	-0.01066	-0.000965593	0.00277	0.00378	0.005	0.00163	-0.00322	-0.00517	-0.00624	-0.00605	-0.00474	-0.00559	-0.00653	-0.00529	-0.00768	-0.01782	-0.02541	-0.01953
0.12985	0.02903	0.06045	0.06666	0.05574	0.04129	0.01844	-0.00555	-0.01938	-0.02466	-0.02717	-0.03214	-0.0428	-0.04381	-0.01906	0.02066	0.05137	0.04285	0.01688	0.00725	0.00562	-0.00461	-0.01206	0.000864554	0.01497	0.00794	-0.00397	-0.00958	-0.01344	-0.01743	-0.01908	-0.01795	-0.01078	-0.00103	0.00286	0.00393	0.00508	0.00163	-0.00332	-0.00527	-0.00616	-0.0058	-0.00451	-0.00549	-0.00644	-0.00516	-0.00761	-0.0179	-0.02555	-0.01959
0.13003	0.02905	0.06052	0.06683	0.05596	0.0415	0.01873	-0.00507	-0.01882	-0.02416	-0.02672	-0.03173	-0.0426	-0.04381	-0.01901	0.02087	0.0517	0.04312	0.01714	0.00755	0.00595	-0.00423	-0.01173	0.000819873	0.0146	0.00768	-0.00404	-0.00966	-0.01351	-0.01742	-0.01905	-0.01799	-0.01089	-0.00108	0.00296	0.00408	0.00517	0.00164	-0.00342	-0.00536	-0.00609	-0.00555	-0.00427	-0.0054	-0.00635	-0.00503	-0.00753	-0.01798	-0.02569	-0.01965
0.13022	0.02908	0.0606	0.06699	0.05617	0.0417	0.01902	-0.00459	-0.01824	-0.02364	-0.02626	-0.03132	-0.0424	-0.04382	-0.01896	0.02109	0.05201	0.04339	0.01741	0.00786	0.00627	-0.00384	-0.01141	0.000773518	0.01423	0.00741	-0.00412	-0.00976	-0.01359	-0.01741	-0.01902	-0.01803	-0.011	-0.00113	0.00306	0.00422	0.00525	0.00164	-0.00352	-0.00546	-0.00601	-0.0053	-0.00403	-0.0053	-0.00626	-0.00489	-0.00747	-0.01807	-0.02583	-0.0197
0.1304	0.0291	0.06067	0.06714	0.05638	0.0419	0.01931	-0.0041	-0.01766	-0.02312	-0.02579	-0.0309	-0.0422	-0.04382	-0.01891	0.02129	0.05233	0.04366	0.01768	0.00817	0.00659	-0.00345	-0.01108	0.000725516	0.01385	0.00712	-0.00421	-0.00985	-0.01368	-0.0174	-0.01898	-0.01807	-0.0111	-0.00117	0.00316	0.00437	0.00533	0.00165	-0.00361	-0.00555	-0.00593	-0.00505	-0.0038	-0.0052	-0.00616	-0.00476	-0.0074	-0.01816	-0.02597	-0.01977
0.13059	0.02912	0.06075	0.06729	0.05657	0.04209	0.0196	-0.00361	-0.01707	-0.02259	-0.02532	-0.03047	-0.042	-0.04383	-0.01887	0.0215	0.05263	0.04392	0.01795	0.00848	0.00692	-0.00307	-0.01075	0.000675927	0.01347	0.00684	-0.00431	-0.00996	-0.01377	-0.0174	-0.01895	-0.0181	-0.0112	-0.00121	0.00327	0.0045	0.0054	0.00165	-0.00371	-0.00564	-0.00585	-0.0048	-0.00355	-0.00509	-0.00606	-0.00463	-0.00734	-0.01825	-0.02612	-0.01983
0.13077	0.02915	0.06082	0.06744	0.05677	0.04228	0.01988	-0.00312	-0.01648	-0.02205	-0.02484	-0.03005	-0.04179	-0.04384	-0.01883	0.0217	0.05293	0.04418	0.01822	0.00879	0.00724	-0.00269	-0.01043	0.000624815	0.01309	0.00654	-0.00442	-0.01007	-0.01387	-0.01739	-0.01891	-0.01814	-0.0113	-0.00124	0.00338	0.00464	0.00547	0.00165	-0.0038	-0.00573	-0.00577	-0.00454	-0.00331	-0.00499	-0.00596	-0.0045	-0.00728	-0.01835	-0.02627	-0.01989
0.13096	0.02917	0.06089	0.06758	0.05695	0.04247	0.02017	-0.00262	-0.01588	-0.02151	-0.02436	-0.02962	-0.04159	-0.04385	-0.01879	0.02189	0.05323	0.04443	0.01849	0.00911	0.00756	-0.00231	-0.01011	0.000572246	0.0127	0.00624	-0.00453	-0.01019	-0.01397	-0.01739	-0.01887	-0.01817	-0.01139	-0.00126	0.00349	0.00477	0.00554	0.00166	-0.00389	-0.00582	-0.00569	-0.00429	-0.00307	-0.00488	-0.00586	-0.00437	-0.00723	-0.01846	-0.02642	-0.01995
0.13114	0.02919	0.06096	0.06771	0.05713	0.04265	0.02046	-0.00211	-0.01527	-0.02096	-0.02387	-0.02918	-0.04138	-0.04385	-0.01875	0.02208	0.05351	0.04468	0.01876	0.00942	0.00788	-0.00194	-0.00979	0.000518285	0.01231	0.00593	-0.00466	-0.01031	-0.01407	-0.01739	-0.01883	-0.01819	-0.01147	-0.00128	0.0036	0.00491	0.00561	0.00166	-0.00398	-0.00591	-0.00561	-0.00403	-0.00282	-0.00477	-0.00576	-0.00425	-0.00718	-0.01857	-0.02658	-0.02002
0.13133	0.02921	0.06102	0.06784	0.0573	0.04282	0.02074	-0.00161	-0.01466	-0.02041	-0.02338	-0.02875	-0.04117	-0.04386	-0.01872	0.02227	0.0538	0.04493	0.01902	0.00973	0.0082	-0.00157	-0.00947	0.000462999	0.01192	0.00561	-0.00479	-0.01043	-0.01418	-0.0174	-0.01879	-0.01821	-0.01155	-0.00129	0.00371	0.00503	0.00567	0.00167	-0.00407	-0.00599	-0.00553	-0.00378	-0.00258	-0.00466	-0.00565	-0.00412	-0.00714	-0.01869	-0.02673	-0.02009
0.13151	0.02924	0.06108	0.06796	0.05746	0.04299	0.02103	-0.0011	-0.01404	-0.01985	-0.02288	-0.02831	-0.04096	-0.04387	-0.01869	0.02245	0.05407	0.04517	0.01928	0.01005	0.00851	-0.0012	-0.00916	0.000406453	0.01152	0.00529	-0.00492	-0.01057	-0.01429	-0.0174	-0.01875	-0.01823	-0.01162	-0.00129	0.00383	0.00516	0.00573	0.00167	-0.00415	-0.00608	-0.00545	-0.00352	-0.00233	-0.00454	-0.00555	-0.004	-0.0071	-0.01881	-0.02689	-0.02016
0.1317	0.02926	0.06115	0.06808	0.05762	0.04315	0.02131	-0.000592744	-0.01342	-0.01929	-0.02238	-0.02786	-0.04075	-0.04388	-0.01866	0.02263	0.05434	0.0454	0.01954	0.01036	0.00882	-0.000834816	-0.00884	0.000348712	0.01112	0.00496	-0.00507	-0.0107	-0.0144	-0.01741	-0.01871	-0.01825	-0.01169	-0.00129	0.00395	0.00528	0.00579	0.00168	-0.00423	-0.00616	-0.00536	-0.00326	-0.00208	-0.00442	-0.00544	-0.00387	-0.00707	-0.01894	-0.02706	-0.02023
0.13188	0.02928	0.06121	0.06819	0.05777	0.04331	0.02158	-8.30931e-05	-0.0128	-0.01872	-0.02187	-0.02741	-0.04053	-0.04389	-0.01863	0.0228	0.0546	0.04562	0.0198	0.01067	0.00913	-0.00047658	-0.00854	0.000289841	0.01072	0.00463	-0.00522	-0.01084	-0.01452	-0.01742	-0.01866	-0.01826	-0.01175	-0.00129	0.00407	0.0054	0.00584	0.00168	-0.00431	-0.00623	-0.00527	-0.003	-0.00183	-0.0043	-0.00533	-0.00375	-0.00704	-0.01907	-0.02723	-0.0203
0.13207	0.02931	0.06126	0.0683	0.0579	0.04346	0.02186	0.000427008	-0.01218	-0.01815	-0.02136	-0.02696	-0.04031	-0.04389	-0.0186	0.02296	0.05485	0.04584	0.02006	0.01097	0.00943	-0.000123512	-0.00823	0.000229908	0.01032	0.00429	-0.00538	-0.01098	-0.01464	-0.01743	-0.01862	-0.01827	-0.01181	-0.00128	0.0042	0.00552	0.00589	0.00169	-0.00439	-0.00631	-0.00518	-0.00274	-0.00158	-0.00418	-0.00522	-0.00363	-0.00702	-0.01921	-0.0274	-0.02037
0.13225	0.02933	0.06132	0.06839	0.05803	0.0436	0.02213	0.000937039	-0.01155	-0.01757	-0.02084	-0.0265	-0.04009	-0.0439	-0.01858	0.02312	0.05509	0.04606	0.02031	0.01128	0.00972	0.000223993	-0.00793	0.000168976	0.00992	0.00395	-0.00554	-0.01113	-0.01477	-0.01744	-0.01857	-0.01828	-0.01186	-0.00126	0.00432	0.00563	0.00594	0.0017	-0.00446	-0.00638	-0.00509	-0.00248	-0.00132	-0.00405	-0.00511	-0.00352	-0.007	-0.01936	-0.02758	-0.02045
0.13243	0.02935	0.06137	0.06848	0.05815	0.04373	0.02239	0.00145	-0.01092	-0.01699	-0.02032	-0.02604	-0.03987	-0.04391	-0.01856	0.02328	0.05533	0.04626	0.02055	0.01158	0.01001	0.000565554	-0.00763	0.00010712	0.00951	0.0036	-0.00571	-0.01128	-0.0149	-0.01746	-0.01852	-0.01828	-0.01191	-0.00123	0.00445	0.00574	0.00599	0.00171	-0.00454	-0.00645	-0.00499	-0.00221	-0.00106	-0.00393	-0.005	-0.00341	-0.00699	-0.01952	-0.02775	-0.02052
0.13262	0.02937	0.06142	0.06857	0.05826	0.04385	0.02265	0.00195	-0.01029	-0.01641	-0.01979	-0.02557	-0.03964	-0.04391	-0.01854	0.02343	0.05555	0.04646	0.0208	0.01187	0.0103	0.000900857	-0.00734	4.44439e-05	0.00911	0.00325	-0.00589	-0.01143	-0.01503	-0.01748	-0.01847	-0.01828	-0.01195	-0.0012	0.00458	0.00585	0.00603	0.00171	-0.0046	-0.00651	-0.0049	-0.00195	-0.00080662	-0.0038	-0.00489	-0.0033	-0.00699	-0.01968	-0.02794	-0.0206
0.1328	0.02939	0.06147	0.06864	0.05836	0.04397	0.02291	0.00246	-0.00965	-0.01582	-0.01926	-0.0251	-0.03941	-0.04391	-0.01852	0.02358	0.05577	0.04665	0.02103	0.01217	0.01058	0.00123	-0.00705	-1.89415e-05	0.0087	0.00289	-0.00607	-0.01159	-0.01516	-0.01749	-0.01842	-0.01827	-0.01199	-0.00117	0.00471	0.00595	0.00607	0.00172	-0.00467	-0.00657	-0.0048	-0.00168	-0.000546346	-0.00366	-0.00477	-0.00319	-0.007	-0.01985	-0.02813	-0.02068
0.13299	0.02941	0.06151	0.06871	0.05845	0.04408	0.02315	0.00297	-0.00902	-0.01523	-0.01872	-0.02462	-0.03917	-0.04392	-0.01851	0.02371	0.05598	0.04683	0.02127	0.01246	0.01085	0.00155	-0.00676	-8.2924e-05	0.00829	0.00253	-0.00625	-0.01175	-0.01529	-0.01751	-0.01837	-0.01826	-0.01202	-0.00112	0.00484	0.00606	0.00611	0.00173	-0.00473	-0.00663	-0.00469	-0.00141	-0.000284105	-0.00353	-0.00466	-0.00309	-0.00701	-0.02003	-0.02832	-0.02077
0.13317	0.02943	0.06156	0.06878	0.05853	0.04417	0.0234	0.00347	-0.00839	-0.01464	-0.01818	-0.02414	-0.03894	-0.04392	-0.01849	0.02385	0.05618	0.04701	0.02149	0.01274	0.01111	0.00187	-0.00648	-0.000147392	0.00789	0.00217	-0.00644	-0.01191	-0.01543	-0.01754	-0.01832	-0.01825	-0.01204	-0.00108	0.00497	0.00615	0.00614	0.00174	-0.00479	-0.00668	-0.00459	-0.00115	-1.98405e-05	-0.00339	-0.00455	-0.00299	-0.00703	-0.02022	-0.02852	-0.02085
0.13336	0.02945	0.0616	0.06883	0.05859	0.04426	0.02363	0.00396	-0.00776	-0.01405	-0.01764	-0.02366	-0.03869	-0.04392	-0.01848	0.02397	0.05638	0.04717	0.02171	0.01302	0.01137	0.00217	-0.00621	-0.000212233	0.00748	0.00181	-0.00663	-0.01207	-0.01557	-0.01756	-0.01826	-0.01823	-0.01206	-0.00102	0.00511	0.00625	0.00617	0.00175	-0.00484	-0.00672	-0.00448	-0.000874718	0.000246503	-0.00325	-0.00443	-0.00289	-0.00706	-0.02041	-0.02872	-0.02094
0.13354	0.02947	0.06163	0.06888	0.05865	0.04434	0.02386	0.00446	-0.00713	-0.01346	-0.01709	-0.02317	-0.03845	-0.04391	-0.01847	0.0241	0.05656	0.04733	0.02193	0.01329	0.01162	0.00247	-0.00594	-0.000277337	0.00708	0.00144	-0.00683	-0.01223	-0.01571	-0.01759	-0.01821	-0.01821	-0.01208	-0.000960976	0.00525	0.00634	0.00619	0.00176	-0.00489	-0.00677	-0.00437	-0.000603018	0.000514982	-0.0031	-0.00432	-0.0028	-0.00709	-0.02061	-0.02892	-0.02103
0.13373	0.02949	0.06167	0.06892	0.0587	0.0444	0.02408	0.00495	-0.0065	-0.01287	-0.01654	-0.02267	-0.0382	-0.04391	-0.01846	0.02421	0.05673	0.04748	0.02213	0.01355	0.01186	0.00276	-0.00567	-0.00034259	0.00668	0.00107	-0.00703	-0.01239	-0.01585	-0.01761	-0.01815	-0.01819	-0.01208	-0.000894926	0.00538	0.00643	0.00622	0.00177	-0.00494	-0.00681	-0.00425	-0.000329899	0.000785653	-0.00295	-0.0042	-0.00271	-0.00713	-0.02082	-0.02913	-0.02112
0.13391	0.02951	0.0617	0.06895	0.05873	0.04445	0.02429	0.00543	-0.00588	-0.01227	-0.01599	-0.02217	-0.03795	-0.0439	-0.01845	0.02432	0.05689	0.04762	0.02233	0.01381	0.0121	0.00305	-0.00541	-0.000407882	0.00628	0.000706104	-0.00723	-0.01256	-0.016	-0.01764	-0.01809	-0.01816	-0.01209	-0.000822986	0.00552	0.00651	0.00624	0.00178	-0.00498	-0.00684	-0.00414	-5.53374e-05	0.00106	-0.0028	-0.00409	-0.00263	-0.00718	-0.02104	-0.02934	-0.02121
0.1341	0.02953	0.06172	0.06897	0.05875	0.0445	0.02449	0.00591	-0.00526	-0.01168	-0.01543	-0.02167	-0.03769	-0.0439	-0.01845	0.02442	0.05705	0.04775	0.02252	0.01406	0.01232	0.00332	-0.00515	-0.000473101	0.00588	0.000337485	-0.00743	-0.01272	-0.01614	-0.01767	-0.01804	-0.01813	-0.01208	-0.000745171	0.00567	0.00659	0.00625	0.0018	-0.00502	-0.00687	-0.00402	0.000220691	0.00133	-0.00265	-0.00398	-0.00255	-0.00724	-0.02127	-0.02956	-0.02131
0.13428	0.02954	0.06175	0.06899	0.05876	0.04453	0.02468	0.00638	-0.00464	-0.01109	-0.01487	-0.02116	-0.03743	-0.04389	-0.01845	0.02452	0.05719	0.04786	0.02271	0.01431	0.01253	0.00359	-0.0049	-0.000538135	0.00548	-3.11893e-05	-0.00764	-0.01289	-0.01629	-0.0177	-0.01798	-0.01809	-0.01207	-0.000661496	0.00581	0.00667	0.00626	0.00181	-0.00505	-0.00689	-0.00389	0.00049821	0.00161	-0.00249	-0.00386	-0.00248	-0.00731	-0.0215	-0.02978	-0.02141
0.13447	0.02956	0.06177	0.06899	0.05876	0.04454	0.02487	0.00684	-0.00403	-0.0105	-0.01431	-0.02065	-0.03716	-0.04387	-0.01844	0.02461	0.05732	0.04797	0.02288	0.01454	0.01274	0.00384	-0.00466	-0.000602866	0.00509	-0.000399466	-0.00785	-0.01305	-0.01643	-0.01774	-0.01792	-0.01805	-0.01206	-0.000571981	0.00595	0.00674	0.00627	0.00182	-0.00508	-0.00691	-0.00377	0.000777239	0.00189	-0.00233	-0.00375	-0.00241	-0.00738	-0.02174	-0.03001	-0.02151
0.13465	0.02957	0.06179	0.06899	0.05874	0.04455	0.02504	0.00729	-0.00342	-0.00991	-0.01375	-0.02013	-0.03689	-0.04386	-0.01844	0.02469	0.05744	0.04807	0.02305	0.01477	0.01293	0.00409	-0.00442	-0.000667153	0.0047	-0.000766862	-0.00805	-0.01321	-0.01658	-0.01777	-0.01785	-0.01801	-0.01203	-0.000476666	0.0061	0.00681	0.00628	0.00183	-0.00511	-0.00692	-0.00364	0.00106	0.00217	-0.00217	-0.00364	-0.00235	-0.00746	-0.02199	-0.03024	-0.02161
0.13484	0.02959	0.0618	0.06898	0.05871	0.04454	0.0252	0.00774	-0.00282	-0.00933	-0.01319	-0.01961	-0.03662	-0.04384	-0.01845	0.02477	0.05755	0.04816	0.02321	0.01499	0.01312	0.00433	-0.00418	-0.00073085	0.00431	-0.00113	-0.00826	-0.01337	-0.01673	-0.01781	-0.01779	-0.01796	-0.012	-0.000375595	0.00624	0.00688	0.00628	0.00185	-0.00513	-0.00693	-0.0035	0.00134	0.00246	-0.002	-0.00352	-0.00229	-0.00756	-0.02225	-0.03048	-0.02172
0.13502	0.0296	0.06181	0.06896	0.05867	0.04452	0.02535	0.00818	-0.00223	-0.00875	-0.01262	-0.01909	-0.03634	-0.04382	-0.01845	0.02484	0.05765	0.04824	0.02336	0.0152	0.01329	0.00456	-0.00395	-0.000793809	0.00393	-0.0015	-0.00847	-0.01353	-0.01687	-0.01785	-0.01773	-0.01791	-0.01197	-0.000268814	0.00639	0.00694	0.00627	0.00186	-0.00514	-0.00693	-0.00336	0.00162	0.00275	-0.00183	-0.00341	-0.00224	-0.00766	-0.02251	-0.03072	-0.02182
0.13521	0.02961	0.06182	0.06894	0.05862	0.04448	0.02549	0.00861	-0.00164	-0.00817	-0.01205	-0.01856	-0.03605	-0.0438	-0.01845	0.02491	0.05774	0.0483	0.0235	0.01539	0.01346	0.00477	-0.00373	-0.000855883	0.00355	-0.00186	-0.00868	-0.01369	-0.01702	-0.01789	-0.01766	-0.01785	-0.01193	-0.000156366	0.00654	0.007	0.00627	0.00188	-0.00516	-0.00692	-0.00322	0.00191	0.00304	-0.00166	-0.0033	-0.00219	-0.00776	-0.02279	-0.03096	-0.02193
0.13539	0.02962	0.06182	0.0689	0.05855	0.04443	0.02561	0.00903	-0.00106	-0.00759	-0.01149	-0.01803	-0.03577	-0.04378	-0.01846	0.02496	0.05782	0.04836	0.02363	0.01558	0.01361	0.00498	-0.00351	-0.000916926	0.00318	-0.00222	-0.00888	-0.01384	-0.01717	-0.01793	-0.0176	-0.01779	-0.01188	-3.82959e-05	0.00669	0.00706	0.00625	0.00189	-0.00516	-0.00692	-0.00308	0.0022	0.00333	-0.00149	-0.00319	-0.00215	-0.00788	-0.02307	-0.03121	-0.02205
0.13557	0.02963	0.06182	0.06886	0.05847	0.04437	0.02573	0.00944	-0.000489758	-0.00702	-0.01092	-0.0175	-0.03547	-0.04375	-0.01847	0.02501	0.05789	0.0484	0.02375	0.01576	0.01375	0.00518	-0.0033	-0.00097679	0.00281	-0.00257	-0.00909	-0.01399	-0.01731	-0.01797	-0.01753	-0.01773	-0.01183	8.53508e-05	0.00684	0.00711	0.00624	0.0019	-0.00517	-0.0069	-0.00293	0.00248	0.00362	-0.00131	-0.00308	-0.00212	-0.00801	-0.02336	-0.03146	-0.02216
0.13576	0.02964	0.06181	0.06881	0.05837	0.04429	0.02583	0.00983	7.29667e-05	-0.00646	-0.01035	-0.01696	-0.03518	-0.04372	-0.01848	0.02506	0.05795	0.04844	0.02386	0.01593	0.01388	0.00537	-0.0031	-0.00104	0.00245	-0.00293	-0.00929	-0.01414	-0.01746	-0.01802	-0.01746	-0.01766	-0.01177	0.00021453	0.00699	0.00715	0.00622	0.00192	-0.00516	-0.00688	-0.00278	0.00277	0.00392	-0.00113	-0.00298	-0.00209	-0.00814	-0.02365	-0.03172	-0.02228
0.13594	0.02965	0.0618	0.06874	0.05826	0.04419	0.02591	0.01022	0.00062622	-0.0059	-0.00979	-0.01642	-0.03488	-0.04369	-0.01849	0.02509	0.05799	0.04846	0.02396	0.01609	0.014	0.00555	-0.0029	-0.00109	0.00209	-0.00327	-0.00949	-0.01429	-0.0176	-0.01806	-0.0174	-0.01759	-0.0117	0.000349197	0.00715	0.0072	0.0062	0.00193	-0.00516	-0.00685	-0.00263	0.00306	0.00422	-0.000942233	-0.00287	-0.00206	-0.00828	-0.02395	-0.03198	-0.0224
0.13613	0.02966	0.06179	0.06867	0.05814	0.04408	0.02598	0.01059	0.00117	-0.00534	-0.00922	-0.01588	-0.03458	-0.04366	-0.0185	0.02512	0.05802	0.04847	0.02405	0.01624	0.0141	0.00571	-0.0027	-0.00115	0.00174	-0.00362	-0.00969	-0.01443	-0.01774	-0.01811	-0.01733	-0.01752	-0.01163	0.000489306	0.0073	0.00724	0.00617	0.00195	-0.00515	-0.00682	-0.00247	0.00336	0.00453	-0.000755037	-0.00277	-0.00205	-0.00843	-0.02426	-0.03224	-0.02252
0.13631	0.02966	0.06177	0.06859	0.058	0.04396	0.02604	0.01095	0.0017	-0.0048	-0.00866	-0.01533	-0.03427	-0.04362	-0.01851	0.02515	0.05805	0.04847	0.02413	0.01638	0.0142	0.00587	-0.00252	-0.0012	0.0014	-0.00395	-0.00989	-0.01456	-0.01788	-0.01815	-0.01726	-0.01744	-0.01155	0.000634814	0.00746	0.00727	0.00613	0.00196	-0.00513	-0.00678	-0.00231	0.00365	0.00483	-0.000564841	-0.00266	-0.00204	-0.00859	-0.02458	-0.0325	-0.02264
0.1365	0.02966	0.06175	0.06851	0.05785	0.04382	0.02608	0.0113	0.00222	-0.00426	-0.00809	-0.01479	-0.03396	-0.04358	-0.01853	0.02516	0.05806	0.04846	0.0242	0.0165	0.01428	0.00602	-0.00233	-0.00125	0.00106	-0.00428	-0.01008	-0.0147	-0.01802	-0.0182	-0.01719	-0.01735	-0.01147	0.000785671	0.00761	0.00731	0.0061	0.00197	-0.00511	-0.00674	-0.00215	0.00395	0.00514	-0.000371663	-0.00256	-0.00203	-0.00876	-0.0249	-0.03277	-0.02276
0.13668	0.02967	0.06173	0.06841	0.05769	0.04366	0.02611	0.01163	0.00273	-0.00373	-0.00753	-0.01424	-0.03365	-0.04354	-0.01855	0.02517	0.05806	0.04843	0.02426	0.01662	0.01435	0.00615	-0.00216	-0.0013	0.00073213	-0.00461	-0.01026	-0.01483	-0.01816	-0.01825	-0.01712	-0.01726	-0.01138	0.000941806	0.00777	0.00734	0.00606	0.00199	-0.00509	-0.00669	-0.00198	0.00424	0.00545	-0.000175554	-0.00246	-0.00203	-0.00893	-0.02524	-0.03304	-0.02289
0.13687	0.02967	0.0617	0.0683	0.05751	0.04349	0.02612	0.01195	0.00323	-0.0032	-0.00698	-0.01369	-0.03333	-0.0435	-0.01857	0.02517	0.05804	0.0484	0.0243	0.01672	0.01441	0.00627	-0.00199	-0.00135	0.000410018	-0.00493	-0.01045	-0.01495	-0.0183	-0.01831	-0.01705	-0.01717	-0.01128	0.0011	0.00792	0.00736	0.00601	0.002	-0.00506	-0.00664	-0.00181	0.00454	0.00576	2.34217e-05	-0.00237	-0.00204	-0.00912	-0.02557	-0.03332	-0.02302
0.13705	0.02967	0.06166	0.06819	0.05731	0.0433	0.02612	0.01225	0.00371	-0.00269	-0.00642	-0.01314	-0.03301	-0.04345	-0.01859	0.02517	0.05802	0.04835	0.02434	0.01681	0.01446	0.00639	-0.00182	-0.0014	9.57862e-05	-0.00524	-0.01062	-0.01507	-0.01843	-0.01836	-0.01698	-0.01708	-0.01118	0.00127	0.00808	0.00738	0.00596	0.00201	-0.00502	-0.00657	-0.00163	0.00484	0.00608	0.000225203	-0.00227	-0.00205	-0.00931	-0.02592	-0.0336	-0.02315
0.13724	0.02966	0.06163	0.06807	0.05711	0.04309	0.0261	0.01254	0.00419	-0.00218	-0.00587	-0.01258	-0.03268	-0.0434	-0.01861	0.02516	0.05798	0.04829	0.02436	0.01689	0.01449	0.00649	-0.00166	-0.00144	-0.000210261	-0.00555	-0.0108	-0.01518	-0.01856	-0.01841	-0.01691	-0.01698	-0.01107	0.00144	0.00824	0.0074	0.0059	0.00202	-0.00498	-0.00651	-0.00145	0.00514	0.0064	0.000429729	-0.00218	-0.00208	-0.00951	-0.02626	-0.03387	-0.02328
0.13742	0.02966	0.06158	0.06794	0.05689	0.04287	0.02606	0.01282	0.00464	-0.00169	-0.00532	-0.01203	-0.03236	-0.04335	-0.01863	0.02514	0.05794	0.04822	0.02438	0.01695	0.01451	0.00658	-0.00151	-0.00148	-0.000507817	-0.00584	-0.01096	-0.01529	-0.01869	-0.01847	-0.01684	-0.01688	-0.01096	0.00162	0.00839	0.00741	0.00584	0.00204	-0.00494	-0.00644	-0.00127	0.00544	0.00672	0.000636935	-0.00209	-0.0021	-0.00971	-0.02662	-0.03416	-0.02341
0.13761	0.02965	0.06154	0.0678	0.05665	0.04263	0.02601	0.01307	0.00509	-0.0012	-0.00478	-0.01148	-0.03203	-0.0433	-0.01866	0.02511	0.05788	0.04813	0.02438	0.01701	0.01452	0.00666	-0.00137	-0.00152	-0.000796577	-0.00613	-0.01113	-0.01539	-0.01882	-0.01852	-0.01677	-0.01677	-0.01083	0.0018	0.00855	0.00742	0.00577	0.00205	-0.00489	-0.00636	-0.00109	0.00575	0.00705	0.000846761	-0.002	-0.00214	-0.00993	-0.02698	-0.03444	-0.02355
0.13779	0.02965	0.06149	0.06765	0.0564	0.04237	0.02594	0.01331	0.00551	-0.000727154	-0.00424	-0.01092	-0.0317	-0.04325	-0.01868	0.02508	0.05781	0.04804	0.02437	0.01705	0.01452	0.00674	-0.00122	-0.00155	-0.00108	-0.00641	-0.01128	-0.01549	-0.01894	-0.01858	-0.0167	-0.01666	-0.01071	0.00199	0.00871	0.00742	0.0057	0.00205	-0.00484	-0.00628	-0.000902962	0.00605	0.00737	0.00106	-0.00191	-0.00218	-0.01015	-0.02734	-0.03472	-0.02368
0.13798	0.02964	0.06143	0.06749	0.05613	0.04209	0.02586	0.01354	0.00593	-0.000263265	-0.00371	-0.01037	-0.03136	-0.04319	-0.01871	0.02504	0.05773	0.04793	0.02435	0.01708	0.0145	0.0068	-0.00109	-0.00158	-0.00135	-0.00668	-0.01143	-0.01558	-0.01907	-0.01864	-0.01664	-0.01655	-0.01057	0.00218	0.00887	0.00742	0.00563	0.00206	-0.00479	-0.00619	-0.000712968	0.00636	0.0077	0.00127	-0.00183	-0.00222	-0.01037	-0.02771	-0.03501	-0.02382
0.13816	0.02963	0.06138	0.06733	0.05586	0.0418	0.02575	0.01375	0.00633	0.000189019	-0.00318	-0.00982	-0.03103	-0.04314	-0.01874	0.02499	0.05763	0.04782	0.02432	0.0171	0.01448	0.00685	-0.000959143	-0.00161	-0.00161	-0.00694	-0.01157	-0.01566	-0.01918	-0.0187	-0.01657	-0.01643	-0.01043	0.00237	0.00903	0.00742	0.00554	0.00207	-0.00473	-0.0061	-0.000519996	0.00667	0.00804	0.00149	-0.00175	-0.00227	-0.01061	-0.02808	-0.0353	-0.02396
0.13835	0.02962	0.06131	0.06715	0.05556	0.04149	0.02563	0.01393	0.00671	0.000629214	-0.00266	-0.00927	-0.03069	-0.04308	-0.01878	0.02494	0.05753	0.04769	0.02427	0.0171	0.01444	0.00689	-0.000834776	-0.00163	-0.00186	-0.0072	-0.0117	-0.01574	-0.0193	-0.01876	-0.0165	-0.01631	-0.01029	0.00257	0.00919	0.00741	0.00546	0.00207	-0.00467	-0.006	-0.000324096	0.00698	0.00837	0.00171	-0.00167	-0.00233	-0.01085	-0.02846	-0.03558	-0.0241
0.13853	0.0296	0.06125	0.06697	0.05526	0.04117	0.02549	0.01411	0.00707	0.00106	-0.00214	-0.00872	-0.03035	-0.04302	-0.01881	0.02487	0.05742	0.04755	0.02422	0.0171	0.01438	0.00692	-0.000715887	-0.00165	-0.0021	-0.00744	-0.01183	-0.01581	-0.01941	-0.01882	-0.01643	-0.01619	-0.01014	0.00278	0.00935	0.0074	0.00536	0.00208	-0.0046	-0.00589	-0.000125328	0.00729	0.00871	0.00193	-0.00159	-0.0024	-0.0111	-0.02884	-0.03587	-0.02424
0.13871	0.02959	0.06118	0.06678	0.05493	0.04082	0.02533	0.01426	0.00742	0.00147	-0.00163	-0.00817	-0.03001	-0.04296	-0.01884	0.02481	0.05729	0.0474	0.02415	0.01708	0.01432	0.00693	-0.000602373	-0.00167	-0.00233	-0.00767	-0.01195	-0.01588	-0.01952	-0.01888	-0.01636	-0.01606	-0.00998	0.00299	0.00951	0.00738	0.00527	0.00208	-0.00453	-0.00579	7.62068e-05	0.0076	0.00905	0.00216	-0.00152	-0.00247	-0.01135	-0.02922	-0.03616	-0.02437
0.1389	0.02957	0.0611	0.06658	0.0546	0.04046	0.02516	0.01439	0.00775	0.00187	-0.00113	-0.00762	-0.02967	-0.04289	-0.01888	0.02473	0.05715	0.04723	0.02408	0.01705	0.01424	0.00694	-0.000494118	-0.00168	-0.00255	-0.00789	-0.01206	-0.01593	-0.01962	-0.01894	-0.0163	-0.01593	-0.00982	0.0032	0.00967	0.00736	0.00516	0.00208	-0.00446	-0.00567	0.0002804	0.00791	0.00939	0.00238	-0.00145	-0.00255	-0.01161	-0.02961	-0.03644	-0.02451
0.13908	0.02955	0.06102	0.06637	0.05425	0.04008	0.02496	0.01451	0.00806	0.00226	-0.000639609	-0.00708	-0.02933	-0.04283	-0.01892	0.02465	0.05701	0.04706	0.02399	0.017	0.01416	0.00694	-0.000391007	-0.00169	-0.00275	-0.0081	-0.01216	-0.01598	-0.01972	-0.01901	-0.01623	-0.0158	-0.00965	0.00342	0.00983	0.00734	0.00505	0.00208	-0.00438	-0.00556	0.000487142	0.00822	0.00973	0.00261	-0.00138	-0.00263	-0.01188	-0.03	-0.03673	-0.02465
0.13927	0.02953	0.06094	0.06616	0.05389	0.03968	0.02475	0.01461	0.00836	0.00263	-0.00015389	-0.00654	-0.02899	-0.04276	-0.01896	0.02456	0.05685	0.04688	0.02389	0.01695	0.01406	0.00693	-0.000292925	-0.0017	-0.00295	-0.00829	-0.01225	-0.01602	-0.01982	-0.01907	-0.01617	-0.01567	-0.00948	0.00364	0.00998	0.00731	0.00494	0.00207	-0.0043	-0.00543	0.000696322	0.00854	0.01008	0.00284	-0.00132	-0.00272	-0.01215	-0.03039	-0.03702	-0.02479
0.13945	0.02951	0.06085	0.06594	0.05351	0.03927	0.02452	0.01469	0.00864	0.00299	0.000323332	-0.00601	-0.02865	-0.0427	-0.01901	0.02447	0.05668	0.04668	0.02378	0.01688	0.01395	0.00691	-0.000199758	-0.0017	-0.00314	-0.00848	-0.01234	-0.01606	-0.01991	-0.01914	-0.0161	-0.01553	-0.0093	0.00387	0.01014	0.00727	0.00482	0.00207	-0.00421	-0.00531	0.000907831	0.00885	0.01043	0.00307	-0.00126	-0.00281	-0.01243	-0.03078	-0.0373	-0.02493
0.13964	0.02949	0.06076	0.06571	0.05312	0.03884	0.02427	0.01475	0.00889	0.00334	0.000791634	-0.00548	-0.02831	-0.04263	-0.01905	0.02437	0.0565	0.04648	0.02366	0.0168	0.01383	0.00688	-0.000111388	-0.0017	-0.00331	-0.00865	-0.01241	-0.01608	-0.02	-0.0192	-0.01604	-0.01539	-0.00912	0.0041	0.0103	0.00724	0.00469	0.00206	-0.00413	-0.00517	0.00112	0.00917	0.01078	0.00331	-0.0012	-0.00291	-0.01271	-0.03118	-0.03758	-0.02507
0.13982	0.02946	0.06066	0.06547	0.05272	0.03839	0.024	0.01479	0.00913	0.00367	0.00125	-0.00495	-0.02797	-0.04256	-0.0191	0.02426	0.05632	0.04627	0.02354	0.01671	0.01369	0.00684	-2.77026e-05	-0.00169	-0.00348	-0.00882	-0.01248	-0.0161	-0.02008	-0.01927	-0.01598	-0.01525	-0.00893	0.00433	0.01046	0.0072	0.00456	0.00205	-0.00404	-0.00504	0.00134	0.00948	0.01113	0.00354	-0.00114	-0.00302	-0.01299	-0.03157	-0.03786	-0.02521
0.14001	0.02944	0.06057	0.06522	0.0523	0.03793	0.02372	0.01481	0.00936	0.00398	0.0017	-0.00443	-0.02764	-0.0425	-0.01915	0.02414	0.05612	0.04604	0.0234	0.01661	0.01355	0.0068	5.14147e-05	-0.00168	-0.00363	-0.00896	-0.01254	-0.01611	-0.02016	-0.01934	-0.01592	-0.0151	-0.00873	0.00457	0.01062	0.00715	0.00442	0.00203	-0.00395	-0.0049	0.00156	0.0098	0.01149	0.00378	-0.00109	-0.00313	-0.01328	-0.03197	-0.03814	-0.02534
0.14019	0.02941	0.06046	0.06497	0.05187	0.03744	0.02341	0.01481	0.00956	0.00428	0.00214	-0.00391	-0.0273	-0.04243	-0.0192	0.02402	0.05591	0.04581	0.02325	0.0165	0.0134	0.00674	0.000126079	-0.00166	-0.00377	-0.0091	-0.01258	-0.01612	-0.02024	-0.01941	-0.01586	-0.01496	-0.00854	0.00481	0.01078	0.0071	0.00428	0.00202	-0.00385	-0.00476	0.00177	0.01012	0.01184	0.00402	-0.00104	-0.00324	-0.01357	-0.03236	-0.03842	-0.02548
0.14038	0.02938	0.06035	0.06471	0.05143	0.03694	0.02309	0.01479	0.00974	0.00456	0.00257	-0.0034	-0.02697	-0.04236	-0.01925	0.0239	0.05569	0.04557	0.02309	0.01637	0.01323	0.00667	0.000196405	-0.00164	-0.00389	-0.00923	-0.01262	-0.01611	-0.02031	-0.01947	-0.01581	-0.01481	-0.00833	0.00505	0.01094	0.00705	0.00413	0.002	-0.00375	-0.00461	0.002	0.01044	0.0122	0.00426	-0.000996395	-0.00337	-0.01387	-0.03276	-0.03869	-0.02561
0.14056	0.02934	0.06024	0.06444	0.05097	0.03643	0.02275	0.01476	0.0099	0.00483	0.00298	-0.0029	-0.02664	-0.0423	-0.01931	0.02376	0.05547	0.04532	0.02292	0.01624	0.01306	0.0066	0.000262515	-0.00162	-0.00401	-0.00934	-0.01265	-0.0161	-0.02038	-0.01954	-0.01575	-0.01466	-0.00813	0.0053	0.01109	0.00699	0.00397	0.00198	-0.00365	-0.00446	0.00222	0.01075	0.01256	0.0045	-0.000953255	-0.00349	-0.01417	-0.03315	-0.03896	-0.02574
0.14075	0.02931	0.06013	0.06417	0.05051	0.0359	0.02239	0.0147	0.01005	0.00508	0.00339	-0.0024	-0.02631	-0.04223	-0.01937	0.02362	0.05523	0.04506	0.02275	0.01609	0.01288	0.00652	0.000324557	-0.00159	-0.00411	-0.00943	-0.01266	-0.01608	-0.02044	-0.01961	-0.0157	-0.01451	-0.00791	0.00555	0.01125	0.00693	0.00381	0.00195	-0.00355	-0.00431	0.00244	0.01107	0.01292	0.00474	-0.000913251	-0.00362	-0.01447	-0.03354	-0.03922	-0.02587
0.14093	0.02927	0.06001	0.06389	0.05003	0.03535	0.02201	0.01462	0.01017	0.00531	0.00378	-0.00191	-0.02598	-0.04216	-0.01942	0.02348	0.05499	0.0448	0.02256	0.01594	0.01268	0.00643	0.000382685	-0.00155	-0.0042	-0.00952	-0.01267	-0.01605	-0.0205	-0.01968	-0.01565	-0.01436	-0.0077	0.00581	0.01141	0.00686	0.00364	0.00192	-0.00345	-0.00415	0.00267	0.01139	0.01328	0.00498	-0.000876364	-0.00376	-0.01477	-0.03393	-0.03948	-0.026
0.14112	0.02924	0.05989	0.0636	0.04953	0.03478	0.02162	0.01452	0.01027	0.00552	0.00417	-0.00143	-0.02566	-0.0421	-0.01949	0.02333	0.05474	0.04452	0.02237	0.01577	0.01248	0.00633	0.000437055	-0.00151	-0.00428	-0.00959	-0.01267	-0.01602	-0.02055	-0.01976	-0.0156	-0.01421	-0.00748	0.00606	0.01156	0.00679	0.00346	0.00189	-0.00335	-0.00399	0.0029	0.01171	0.01364	0.00522	-0.000842572	-0.0039	-0.01508	-0.03432	-0.03974	-0.02612
0.1413	0.0292	0.05976	0.06331	0.04903	0.0342	0.0212	0.01441	0.01035	0.00572	0.00454	-0.000957381	-0.02534	-0.04204	-0.01955	0.02317	0.05448	0.04424	0.02217	0.01559	0.01227	0.00623	0.000487821	-0.00147	-0.00434	-0.00965	-0.01265	-0.01597	-0.0206	-0.01983	-0.01555	-0.01405	-0.00725	0.00633	0.01172	0.00671	0.00328	0.00186	-0.00324	-0.00383	0.00313	0.01203	0.01401	0.00546	-0.000811855	-0.00404	-0.01539	-0.0347	-0.03999	-0.02624
0.14149	0.02916	0.05963	0.063	0.04852	0.03361	0.02077	0.01427	0.01042	0.0059	0.00489	-0.000492809	-0.02503	-0.04197	-0.01962	0.02301	0.05421	0.04396	0.02196	0.01541	0.01205	0.00612	0.000535139	-0.00142	-0.0044	-0.00969	-0.01263	-0.01592	-0.02065	-0.0199	-0.01551	-0.0139	-0.00702	0.00659	0.01187	0.00663	0.00309	0.00182	-0.00313	-0.00366	0.00335	0.01234	0.01437	0.00571	-0.000784194	-0.00419	-0.0157	-0.03509	-0.04023	-0.02636
0.14167	0.02911	0.0595	0.0627	0.04799	0.033	0.02033	0.01411	0.01046	0.00607	0.00524	-3.74472e-05	-0.02472	-0.04191	-0.01968	0.02284	0.05394	0.04366	0.02175	0.01521	0.01183	0.006	0.000579163	-0.00136	-0.00444	-0.00972	-0.01259	-0.01586	-0.02069	-0.01997	-0.01546	-0.01374	-0.00679	0.00686	0.01203	0.00655	0.0029	0.00178	-0.00302	-0.00349	0.00358	0.01266	0.01474	0.00595	-0.000759569	-0.00434	-0.01601	-0.03546	-0.04047	-0.02648
0.14185	0.02907	0.05936	0.06239	0.04745	0.03237	0.01986	0.01394	0.01048	0.00621	0.00557	0.000408235	-0.02442	-0.04185	-0.01975	0.02267	0.05366	0.04336	0.02152	0.01501	0.01159	0.00588	0.000620047	-0.0013	-0.00446	-0.00974	-0.01254	-0.0158	-0.02072	-0.02004	-0.01542	-0.01358	-0.00655	0.00713	0.01218	0.00647	0.0027	0.00173	-0.00291	-0.00333	0.00381	0.01298	0.0151	0.0062	-0.000737958	-0.0045	-0.01632	-0.03584	-0.04071	-0.02659
0.14204	0.02902	0.05922	0.06207	0.04691	0.03173	0.01938	0.01374	0.01048	0.00634	0.00588	0.000843771	-0.02412	-0.04179	-0.01983	0.0225	0.05337	0.04306	0.02129	0.0148	0.01135	0.00575	0.000657947	-0.00124	-0.00448	-0.00974	-0.01249	-0.01572	-0.02075	-0.02011	-0.01538	-0.01343	-0.00632	0.0074	0.01234	0.00638	0.0025	0.00168	-0.0028	-0.00316	0.00404	0.01329	0.01547	0.00644	-0.000719342	-0.00465	-0.01663	-0.03621	-0.04093	-0.0267
0.14222	0.02898	0.05907	0.06174	0.04635	0.03107	0.01888	0.01353	0.01047	0.00645	0.00619	0.00127	-0.02383	-0.04174	-0.0199	0.02231	0.05307	0.04274	0.02106	0.01458	0.0111	0.00562	0.000693017	-0.00117	-0.00448	-0.00973	-0.01242	-0.01564	-0.02078	-0.02019	-0.01535	-0.01327	-0.00607	0.00767	0.01249	0.00628	0.00229	0.00163	-0.00269	-0.00298	0.00427	0.01361	0.01583	0.00668	-0.000703702	-0.00482	-0.01694	-0.03657	-0.04115	-0.0268
0.14241	0.02893	0.05893	0.06141	0.04578	0.03041	0.01837	0.01329	0.01043	0.00654	0.00648	0.00168	-0.02354	-0.04169	-0.01998	0.02213	0.05277	0.04243	0.02082	0.01435	0.01085	0.00548	0.000725413	-0.0011	-0.00447	-0.0097	-0.01234	-0.01555	-0.0208	-0.02026	-0.01531	-0.01311	-0.00583	0.00795	0.01264	0.00618	0.00207	0.00158	-0.00258	-0.00281	0.0045	0.01392	0.0162	0.00693	-0.000691015	-0.00498	-0.01724	-0.03693	-0.04137	-0.0269
0.14259	0.02888	0.05878	0.06108	0.0452	0.02972	0.01784	0.01304	0.01037	0.00661	0.00675	0.00208	-0.02327	-0.04163	-0.02006	0.02193	0.05247	0.04211	0.02057	0.01411	0.01059	0.00533	0.000755289	-0.00102	-0.00445	-0.00966	-0.01225	-0.01545	-0.02081	-0.02033	-0.01528	-0.01295	-0.00558	0.00823	0.01279	0.00608	0.00185	0.00152	-0.00247	-0.00264	0.00473	0.01424	0.01656	0.00717	-0.000681254	-0.00515	-0.01755	-0.03728	-0.04157	-0.02699
0.14278	0.02882	0.05862	0.06074	0.04462	0.02903	0.01729	0.01277	0.01029	0.00666	0.00701	0.00248	-0.023	-0.04159	-0.02014	0.02174	0.05215	0.04178	0.02032	0.01387	0.01032	0.00518	0.000782804	-0.000932724	-0.00441	-0.0096	-0.01215	-0.01534	-0.02082	-0.0204	-0.01525	-0.0128	-0.00533	0.00851	0.01295	0.00598	0.00162	0.00145	-0.00236	-0.00246	0.00496	0.01455	0.01693	0.00741	-0.000674349	-0.00532	-0.01786	-0.03763	-0.04177	-0.02708
0.14296	0.02877	0.05846	0.06039	0.04402	0.02832	0.01673	0.01248	0.01019	0.0067	0.00725	0.00285	-0.02273	-0.04154	-0.02022	0.02154	0.05183	0.04145	0.02006	0.01362	0.01005	0.00503	0.000808118	-0.000843349	-0.00437	-0.00953	-0.01204	-0.01523	-0.02083	-0.02048	-0.01523	-0.01264	-0.00508	0.00879	0.0131	0.00587	0.00138	0.00139	-0.00225	-0.00228	0.00519	0.01486	0.01729	0.00765	-0.000670224	-0.00549	-0.01816	-0.03797	-0.04196	-0.02717
0.14315	0.02872	0.0583	0.06004	0.04342	0.0276	0.01615	0.01217	0.01007	0.00671	0.00748	0.00322	-0.02248	-0.0415	-0.0203	0.02133	0.05151	0.04112	0.0198	0.01336	0.00977	0.00487	0.00083139	-0.000749008	-0.00431	-0.00945	-0.01192	-0.01511	-0.02083	-0.02055	-0.0152	-0.01248	-0.00482	0.00907	0.01325	0.00575	0.00114	0.00131	-0.00213	-0.00211	0.00542	0.01517	0.01765	0.00789	-0.000668798	-0.00566	-0.01846	-0.0383	-0.04214	-0.02725
0.14333	0.02866	0.05814	0.05969	0.04281	0.02687	0.01556	0.01185	0.00993	0.00671	0.00769	0.00357	-0.02223	-0.04146	-0.02039	0.02113	0.05118	0.04078	0.01953	0.0131	0.00949	0.00471	0.000852779	-0.000649738	-0.00423	-0.00935	-0.01178	-0.01498	-0.02083	-0.02062	-0.01518	-0.01233	-0.00457	0.00936	0.01339	0.00564	0.000894176	0.00124	-0.00202	-0.00193	0.00564	0.01548	0.01801	0.00813	-0.000669996	-0.00583	-0.01876	-0.03863	-0.04231	-0.02732
0.14352	0.0286	0.05798	0.05933	0.04219	0.02613	0.01496	0.0115	0.00977	0.00669	0.00788	0.00391	-0.02199	-0.04142	-0.02048	0.02091	0.05085	0.04045	0.01926	0.01283	0.00921	0.00454	0.000872443	-0.000545572	-0.00415	-0.00924	-0.01164	-0.01485	-0.02082	-0.02069	-0.01516	-0.01217	-0.00431	0.00964	0.01354	0.00552	0.00064272	0.00116	-0.00191	-0.00175	0.00587	0.01578	0.01837	0.00837	-0.000673739	-0.00601	-0.01906	-0.03894	-0.04248	-0.02739
0.1437	0.02854	0.05781	0.05897	0.04156	0.02538	0.01434	0.01114	0.00959	0.00665	0.00806	0.00424	-0.02176	-0.04139	-0.02057	0.0207	0.05052	0.04011	0.01899	0.01255	0.00892	0.00437	0.000890544	-0.000436545	-0.00405	-0.00911	-0.01148	-0.0147	-0.0208	-0.02076	-0.01515	-0.01201	-0.00405	0.00993	0.01369	0.00539	0.000386026	0.00108	-0.0018	-0.00158	0.00609	0.01608	0.01873	0.0086	-0.000679949	-0.00618	-0.01935	-0.03925	-0.04263	-0.02745
0.14389	0.02848	0.05764	0.0586	0.04093	0.02461	0.01371	0.01077	0.0094	0.0066	0.00823	0.00455	-0.02154	-0.04136	-0.02066	0.02048	0.05018	0.03977	0.01872	0.01227	0.00863	0.0042	0.000907239	-0.000322692	-0.00394	-0.00897	-0.01132	-0.01456	-0.02079	-0.02083	-0.01513	-0.01186	-0.00379	0.01022	0.01384	0.00527	0.000124223	0.000992197	-0.00169	-0.0014	0.00632	0.01638	0.01909	0.00884	-0.000688548	-0.00636	-0.01964	-0.03955	-0.04277	-0.0275
0.14407	0.02842	0.05746	0.05823	0.04029	0.02384	0.01307	0.01037	0.00918	0.00652	0.00838	0.00484	-0.02133	-0.04133	-0.02076	0.02026	0.04983	0.03942	0.01844	0.01199	0.00833	0.00403	0.000922688	-0.000204048	-0.00382	-0.00882	-0.01114	-0.0144	-0.02076	-0.0209	-0.01512	-0.01171	-0.00352	0.01051	0.01398	0.00514	-0.000142559	0.000902845	-0.00158	-0.00123	0.00654	0.01668	0.01944	0.00907	-0.000699458	-0.00654	-0.01992	-0.03984	-0.04291	-0.02755
0.14426	0.02835	0.05729	0.05786	0.03964	0.02306	0.01241	0.00996	0.00895	0.00643	0.00851	0.00512	-0.02113	-0.04131	-0.02085	0.02003	0.04949	0.03908	0.01816	0.0117	0.00803	0.00386	0.00093705	-8.06474e-05	-0.00369	-0.00865	-0.01096	-0.01424	-0.02074	-0.02097	-0.01511	-0.01156	-0.00326	0.0108	0.01413	0.00501	-0.000414191	0.000809999	-0.00147	-0.00105	0.00675	0.01698	0.01979	0.0093	-0.000712602	-0.00672	-0.0202	-0.04012	-0.04303	-0.02759
0.14444	0.02829	0.05711	0.05749	0.03899	0.02227	0.01175	0.00954	0.00869	0.00632	0.00862	0.00539	-0.02094	-0.04129	-0.02095	0.0198	0.04914	0.03874	0.01788	0.01141	0.00774	0.00368	0.000950485	4.74754e-05	-0.00354	-0.00847	-0.01076	-0.01407	-0.0207	-0.02104	-0.01511	-0.01141	-0.00299	0.01109	0.01427	0.00487	-0.000690544	0.000713698	-0.00137	-0.000880448	0.00697	0.01727	0.02014	0.00953	-0.000727901	-0.00689	-0.02048	-0.04039	-0.04314	-0.02762
0.14463	0.02822	0.05693	0.05711	0.03834	0.02147	0.01107	0.00909	0.00842	0.00619	0.00872	0.00564	-0.02076	-0.04128	-0.02105	0.01957	0.04879	0.03839	0.01759	0.01111	0.00744	0.0035	0.000963143	0.000180275	-0.00339	-0.00827	-0.01055	-0.0139	-0.02067	-0.02111	-0.0151	-0.01126	-0.00273	0.01139	0.01441	0.00473	-0.000971466	0.000614004	-0.00126	-0.000709039	0.00718	0.01756	0.02049	0.00975	-0.000745275	-0.00707	-0.02074	-0.04065	-0.04324	-0.02765
0.14481	0.02815	0.05674	0.05673	0.03767	0.02066	0.01038	0.00864	0.00813	0.00604	0.0088	0.00588	-0.02059	-0.04127	-0.02116	0.01934	0.04844	0.03805	0.01731	0.01082	0.00714	0.00332	0.000975149	0.000317663	-0.00322	-0.00806	-0.01034	-0.01372	-0.02063	-0.02117	-0.0151	-0.01111	-0.00246	0.01168	0.01455	0.00459	-0.00126	0.000511064	-0.00116	-0.000539216	0.00739	0.01784	0.02083	0.00998	-0.000764626	-0.00725	-0.02101	-0.04089	-0.04333	-0.02767
0.14499	0.02808	0.05656	0.05634	0.03701	0.01985	0.00968	0.00817	0.00782	0.00587	0.00886	0.00609	-0.02043	-0.04126	-0.02126	0.01911	0.04808	0.03771	0.01703	0.01051	0.00683	0.00315	0.000986616	0.00045954	-0.00304	-0.00784	-0.01011	-0.01353	-0.02058	-0.02124	-0.0151	-0.01096	-0.0022	0.01197	0.01469	0.00445	-0.00155	0.000405049	-0.00105	-0.000371141	0.0076	0.01813	0.02117	0.0102	-0.000785856	-0.00742	-0.02126	-0.04113	-0.04341	-0.02768
0.14518	0.02801	0.05637	0.05596	0.03634	0.01903	0.00898	0.00768	0.0075	0.00569	0.00891	0.0063	-0.02028	-0.04126	-0.02136	0.01887	0.04773	0.03737	0.01674	0.01021	0.00653	0.00297	0.000997659	0.000605808	-0.00285	-0.0076	-0.00988	-0.01334	-0.02054	-0.0213	-0.01511	-0.01082	-0.00193	0.01226	0.01483	0.0043	-0.00184	0.000296128	-0.000952024	-0.000204978	0.00781	0.0184	0.0215	0.01042	-0.000808865	-0.0076	-0.02151	-0.04135	-0.04348	-0.02768
0.14536	0.02794	0.05618	0.05557	0.03566	0.0182	0.00826	0.00718	0.00716	0.00549	0.00893	0.00648	-0.02015	-0.04127	-0.02147	0.01863	0.04737	0.03703	0.01646	0.00991	0.00623	0.00279	0.00101	0.000756368	-0.00265	-0.00735	-0.00963	-0.01315	-0.02048	-0.02137	-0.01511	-0.01068	-0.00166	0.01255	0.01497	0.00415	-0.00214	0.000184471	-0.000851696	-4.08915e-05	0.00801	0.01868	0.02183	0.01063	-0.000833553	-0.00777	-0.02175	-0.04157	-0.04354	-0.02768
0.14555	0.02787	0.05599	0.05518	0.03499	0.01737	0.00753	0.00667	0.0068	0.00527	0.00895	0.00665	-0.02003	-0.04128	-0.02158	0.01839	0.04702	0.03669	0.01617	0.0096	0.00593	0.00261	0.00102	0.000911122	-0.00243	-0.00709	-0.00937	-0.01295	-0.02043	-0.02143	-0.01512	-0.01054	-0.0014	0.01285	0.01511	0.004	-0.00244	7.02484e-05	-0.000752837	0.000120955	0.00821	0.01895	0.02216	0.01084	-0.000859821	-0.00794	-0.02199	-0.04177	-0.04358	-0.02767
0.14573	0.0278	0.0558	0.05479	0.03431	0.01654	0.0068	0.00615	0.00643	0.00504	0.00894	0.0068	-0.01992	-0.04129	-0.02169	0.01815	0.04666	0.03635	0.01589	0.00929	0.00563	0.00243	0.00103	0.00107	-0.00221	-0.00681	-0.00911	-0.01274	-0.02037	-0.02149	-0.01513	-0.0104	-0.00113	0.01314	0.01524	0.00385	-0.00274	-4.63706e-05	-0.0006555	0.000280399	0.0084	0.01922	0.02248	0.01105	-0.000887569	-0.00811	-0.02222	-0.04195	-0.04361	-0.02765
0.14592	0.02772	0.05561	0.0544	0.03363	0.0157	0.00606	0.00561	0.00604	0.00479	0.00892	0.00694	-0.01982	-0.04131	-0.0218	0.0179	0.0463	0.03602	0.01561	0.00898	0.00533	0.00225	0.00104	0.00123	-0.00198	-0.00652	-0.00883	-0.01253	-0.0203	-0.02155	-0.01515	-0.01027	-0.000869657	0.01343	0.01538	0.00369	-0.00304	-0.000165216	-0.000559735	0.000437276	0.00859	0.01948	0.0228	0.01126	-0.000916699	-0.00828	-0.02244	-0.04213	-0.04363	-0.02762
0.1461	0.02765	0.05541	0.054	0.03295	0.01486	0.00532	0.00507	0.00564	0.00453	0.00888	0.00706	-0.01973	-0.04133	-0.02192	0.01766	0.04594	0.03569	0.01533	0.00868	0.00504	0.00208	0.00105	0.0014	-0.00174	-0.00622	-0.00855	-0.01232	-0.02023	-0.02161	-0.01516	-0.01013	-0.000606957	0.01372	0.01551	0.00353	-0.00335	-0.000286118	-0.000465592	0.000591422	0.00878	0.01974	0.02312	0.01146	-0.000947109	-0.00844	-0.02265	-0.04229	-0.04364	-0.02758
0.14629	0.02757	0.05522	0.05361	0.03226	0.01401	0.00457	0.00451	0.00522	0.00425	0.00882	0.00716	-0.01966	-0.04136	-0.02203	0.01741	0.04559	0.03536	0.01505	0.00837	0.00474	0.0019	0.00106	0.00157	-0.00148	-0.00591	-0.00826	-0.0121	-0.02016	-0.02167	-0.01518	-0.01	-0.000345642	0.014	0.01564	0.00337	-0.00366	-0.000408907	-0.000373123	0.000742675	0.00896	0.01999	0.02342	0.01166	-0.000978702	-0.00861	-0.02285	-0.04244	-0.04363	-0.02753
0.14647	0.02749	0.05502	0.05322	0.03158	0.01316	0.00381	0.00394	0.00479	0.00395	0.00875	0.00724	-0.01959	-0.04139	-0.02215	0.01717	0.04523	0.03504	0.01478	0.00806	0.00445	0.00173	0.00107	0.00174	-0.00122	-0.00558	-0.00796	-0.01187	-0.02009	-0.02173	-0.0152	-0.00988	-8.59366e-05	0.01429	0.01577	0.00321	-0.00398	-0.000533413	-0.000282378	0.000890869	0.00914	0.02024	0.02373	0.01185	-0.00101	-0.00877	-0.02305	-0.04258	-0.04362	-0.02747
0.14666	0.02742	0.05483	0.05283	0.03089	0.01232	0.00305	0.00337	0.00435	0.00364	0.00866	0.00731	-0.01955	-0.04143	-0.02226	0.01692	0.04488	0.03472	0.01451	0.00775	0.00416	0.00156	0.00108	0.00192	-0.0009467	-0.00525	-0.00765	-0.01165	-0.02001	-0.02178	-0.01522	-0.00975	0.000171929	0.01458	0.0159	0.00305	-0.00429	-0.00065945	-0.000193395	0.00104	0.00932	0.02048	0.02402	0.01204	-0.00105	-0.00892	-0.02323	-0.0427	-0.04358	-0.02741
0.14684	0.02734	0.05463	0.05243	0.03021	0.01147	0.00229	0.00278	0.00389	0.00331	0.00855	0.00735	-0.01951	-0.04148	-0.02238	0.01667	0.04452	0.03441	0.01424	0.00745	0.00387	0.00139	0.0011	0.0021	-0.000664741	-0.0049	-0.00734	-0.01142	-0.01993	-0.02184	-0.01525	-0.00963	0.000427721	0.01486	0.01602	0.00288	-0.00461	-0.000786771	-0.000106161	0.00118	0.00949	0.02072	0.02431	0.01223	-0.00108	-0.00908	-0.02341	-0.04281	-0.04354	-0.02733
0.14703	0.02726	0.05443	0.05204	0.02953	0.01062	0.00153	0.00219	0.00342	0.00297	0.00843	0.00738	-0.01949	-0.04152	-0.0225	0.01642	0.04417	0.0341	0.01397	0.00714	0.00359	0.00123	0.00111	0.00229	-0.00037371	-0.00454	-0.00701	-0.01118	-0.01985	-0.02189	-0.01527	-0.00951	0.000681203	0.01514	0.01615	0.00272	-0.00492	-0.000915113	-2.0648e-05	0.00132	0.00966	0.02096	0.0246	0.01241	-0.00112	-0.00923	-0.02358	-0.0429	-0.04348	-0.02725
0.14721	0.02718	0.05423	0.05165	0.02885	0.00977	0.000757117	0.00159	0.00294	0.00261	0.00828	0.00739	-0.01948	-0.04158	-0.02263	0.01618	0.04382	0.03379	0.01371	0.00684	0.00331	0.00106	0.00112	0.00248	-7.38661e-05	-0.00416	-0.00668	-0.01095	-0.01976	-0.02194	-0.0153	-0.0094	0.000932141	0.01542	0.01627	0.00255	-0.00524	-0.00104	6.31706e-05	0.00145	0.00982	0.02118	0.02488	0.01259	-0.00115	-0.00938	-0.02374	-0.04298	-0.04341	-0.02716
0.1474	0.0271	0.05403	0.05126	0.02817	0.00892	-1.24235e-05	0.00098415	0.00245	0.00225	0.00813	0.00739	-0.01949	-0.04164	-0.02275	0.01593	0.04347	0.03349	0.01345	0.00654	0.00304	0.000902992	0.00114	0.00267	0.000234533	-0.00378	-0.00634	-0.01071	-0.01967	-0.02199	-0.01533	-0.00929	0.00118	0.0157	0.01639	0.00238	-0.00556	-0.00117	0.000145322	0.00158	0.00998	0.02141	0.02515	0.01277	-0.00119	-0.00952	-0.02389	-0.04305	-0.04333	-0.02705
0.14758	0.02702	0.05383	0.05087	0.02749	0.00807	-0.000782685	0.000371797	0.00194	0.00186	0.00795	0.00736	-0.0195	-0.0417	-0.02287	0.01568	0.04313	0.03319	0.01319	0.00625	0.00277	0.000745628	0.00115	0.00286	0.000551229	-0.00339	-0.00599	-0.01047	-0.01958	-0.02204	-0.01537	-0.00918	0.00143	0.01597	0.01651	0.00222	-0.00587	-0.0013	0.000225832	0.00171	0.01013	0.02162	0.02541	0.01293	-0.00123	-0.00966	-0.02402	-0.0431	-0.04324	-0.02694
0.14777	0.02694	0.05363	0.05048	0.02681	0.00723	-0.00155	-0.000245725	0.00143	0.00147	0.00776	0.00732	-0.01953	-0.04177	-0.023	0.01543	0.04278	0.0329	0.01294	0.00595	0.0025	0.000591451	0.00117	0.00306	0.000875964	-0.00298	-0.00564	-0.01022	-0.01949	-0.02208	-0.0154	-0.00907	0.00167	0.01624	0.01663	0.00205	-0.00619	-0.00143	0.000304728	0.00183	0.01028	0.02183	0.02567	0.0131	-0.00126	-0.0098	-0.02415	-0.04313	-0.04313	-0.02682
0.14795	0.02686	0.05343	0.0501	0.02614	0.00638	-0.00232	-0.000867707	0.000909231	0.00106	0.00756	0.00726	-0.01958	-0.04185	-0.02312	0.01519	0.04244	0.03262	0.0127	0.00566	0.00224	0.000440644	0.00118	0.00326	0.00121	-0.00257	-0.00528	-0.00997	-0.01939	-0.02213	-0.01544	-0.00897	0.00191	0.01651	0.01675	0.00188	-0.00651	-0.00156	0.000382038	0.00195	0.01042	0.02204	0.02592	0.01326	-0.0013	-0.00993	-0.02427	-0.04316	-0.04301	-0.02669
0.14813	0.02677	0.05323	0.04972	0.02548	0.00555	-0.00309	-0.00149	0.000378798	0.000644124	0.00734	0.00718	-0.01964	-0.04193	-0.02325	0.01494	0.04211	0.03234	0.01246	0.00537	0.00199	0.000293388	0.0012	0.00346	0.00155	-0.00214	-0.00491	-0.00973	-0.01929	-0.02217	-0.01547	-0.00887	0.00214	0.01678	0.01686	0.00171	-0.00682	-0.00169	0.000457787	0.00207	0.01056	0.02223	0.02617	0.01341	-0.00134	-0.01006	-0.02438	-0.04317	-0.04287	-0.02655
0.14832	0.02669	0.05303	0.04934	0.02481	0.00471	-0.00386	-0.00212	-0.000159639	0.000213867	0.0071	0.00709	-0.01971	-0.04202	-0.02337	0.0147	0.04177	0.03207	0.01222	0.00509	0.00174	0.000149868	0.00122	0.00366	0.0019	-0.00171	-0.00454	-0.00948	-0.01919	-0.02221	-0.01551	-0.00878	0.00237	0.01704	0.01697	0.00154	-0.00714	-0.00182	0.000532004	0.00218	0.01069	0.02243	0.0264	0.01356	-0.00138	-0.01018	-0.02448	-0.04316	-0.04273	-0.0264
0.1485	0.02661	0.05283	0.04896	0.02415	0.00389	-0.00462	-0.00275	-0.000705471	-0.000227431	0.00685	0.00697	-0.01979	-0.04211	-0.0235	0.01445	0.04144	0.0318	0.01199	0.00481	0.0015	1.02644e-05	0.00124	0.00387	0.00225	-0.00127	-0.00416	-0.00923	-0.01909	-0.02225	-0.01555	-0.00869	0.0026	0.0173	0.01708	0.00137	-0.00745	-0.00195	0.000604714	0.00229	0.01082	0.02261	0.02663	0.01371	-0.00142	-0.0103	-0.02457	-0.04314	-0.04257	-0.02624
0.14869	0.02652	0.05263	0.04859	0.0235	0.00306	-0.00538	-0.00339	-0.00126	-0.000679327	0.00658	0.00684	-0.01989	-0.0422	-0.02363	0.01421	0.04111	0.03154	0.01177	0.00454	0.00126	-0.000125259	0.00126	0.00407	0.00261	-0.00081577	-0.00378	-0.00897	-0.01898	-0.02228	-0.0156	-0.0086	0.00282	0.01755	0.01719	0.0012	-0.00776	-0.00207	0.000675956	0.00239	0.01094	0.02279	0.02685	0.01385	-0.00146	-0.01042	-0.02465	-0.0431	-0.04239	-0.02608
0.14887	0.02644	0.05243	0.04822	0.02286	0.00225	-0.00613	-0.00402	-0.00182	-0.00114	0.00629	0.00669	-0.02	-0.04231	-0.02376	0.01397	0.04079	0.03129	0.01155	0.00427	0.00103	-0.000256619	0.00128	0.00428	0.00298	-0.000355138	-0.00339	-0.00872	-0.01887	-0.02232	-0.01564	-0.00852	0.00304	0.01781	0.0173	0.00104	-0.00806	-0.0022	0.00074582	0.00249	0.01106	0.02296	0.02706	0.01398	-0.0015	-0.01053	-0.02471	-0.04305	-0.04221	-0.0259
0.14906	0.02636	0.05223	0.04785	0.02222	0.00144	-0.00689	-0.00465	-0.00238	-0.00161	0.006	0.00652	-0.02012	-0.04241	-0.02389	0.01373	0.04047	0.03104	0.01133	0.004	0.000803435	-0.000383752	0.0013	0.00449	0.00335	0.000113832	-0.003	-0.00847	-0.01877	-0.02235	-0.01568	-0.00844	0.00325	0.01805	0.0174	0.000869331	-0.00837	-0.00232	0.000814403	0.00258	0.01117	0.02313	0.02727	0.01411	-0.00154	-0.01063	-0.02477	-0.04299	-0.04201	-0.02571
0.14924	0.02627	0.05204	0.04749	0.02158	0.000635763	-0.00763	-0.00529	-0.00295	-0.00209	0.00568	0.00634	-0.02026	-0.04253	-0.02402	0.0135	0.04016	0.0308	0.01113	0.00374	0.000585283	-0.000506595	0.00132	0.00471	0.00373	0.000590795	-0.0026	-0.00821	-0.01866	-0.02238	-0.01573	-0.00836	0.00346	0.0183	0.01751	0.000703544	-0.00867	-0.00244	0.000881807	0.00267	0.01127	0.02328	0.02746	0.01423	-0.00158	-0.01073	-0.02482	-0.04291	-0.0418	-0.02551
0.14943	0.02619	0.05184	0.04713	0.02096	-0.000157779	-0.00837	-0.00592	-0.00352	-0.00258	0.00536	0.00614	-0.02041	-0.04264	-0.02415	0.01326	0.03984	0.03057	0.01092	0.00349	0.000373874	-0.000625084	0.00135	0.00492	0.00412	0.00108	-0.00219	-0.00796	-0.01855	-0.02241	-0.01577	-0.00829	0.00366	0.01853	0.01761	0.000538965	-0.00897	-0.00256	0.000948131	0.00276	0.01137	0.02344	0.02765	0.01435	-0.00162	-0.01083	-0.02485	-0.04282	-0.04158	-0.02531
0.14961	0.02611	0.05165	0.04677	0.02034	-0.000942557	-0.0091	-0.00655	-0.0041	-0.00308	0.00502	0.00592	-0.02057	-0.04276	-0.02428	0.01303	0.03954	0.03034	0.01073	0.00324	0.000169367	-0.000739156	0.00137	0.00513	0.00451	0.00157	-0.00179	-0.0077	-0.01844	-0.02243	-0.01582	-0.00822	0.00386	0.01877	0.01771	0.00037579	-0.00926	-0.00267	0.00101	0.00284	0.01146	0.02358	0.02783	0.01446	-0.00166	-0.01092	-0.02488	-0.04271	-0.04134	-0.02509
0.1498	0.02602	0.05145	0.04642	0.01973	-0.00172	-0.00983	-0.00718	-0.00468	-0.00358	0.00467	0.00569	-0.02074	-0.04289	-0.0244	0.0128	0.03923	0.03012	0.01054	0.003	-2.80815e-05	-0.000848747	0.0014	0.00535	0.0049	0.00207	-0.00137	-0.00745	-0.01832	-0.02245	-0.01587	-0.00816	0.00405	0.019	0.0178	0.000214214	-0.00955	-0.00278	0.00108	0.00291	0.01155	0.02372	0.028	0.01457	-0.0017	-0.01101	-0.02489	-0.04259	-0.0411	-0.02487
0.14998	0.02594	0.05126	0.04608	0.01913	-0.00248	-0.01054	-0.0078	-0.00526	-0.00409	0.0043	0.00544	-0.02093	-0.04302	-0.02453	0.01257	0.03893	0.0299	0.01036	0.00276	-0.000218313	-0.000953793	0.00142	0.00557	0.0053	0.00257	-0.000959777	-0.00719	-0.01821	-0.02247	-0.01591	-0.0081	0.00423	0.01922	0.0179	5.44321e-05	-0.00983	-0.00289	0.00114	0.00299	0.01163	0.02384	0.02816	0.01467	-0.00174	-0.0111	-0.0249	-0.04245	-0.04084	-0.02464
0.15017	0.02585	0.05107	0.04574	0.01853	-0.00324	-0.01125	-0.00842	-0.00584	-0.00461	0.00392	0.00517	-0.02112	-0.04315	-0.02466	0.01235	0.03864	0.0297	0.01018	0.00253	-0.000401171	-0.00105	0.00145	0.00578	0.00571	0.00308	-0.000541774	-0.00694	-0.01809	-0.02249	-0.01596	-0.00804	0.00441	0.01944	0.01799	-0.000103361	-0.01011	-0.00299	0.0012	0.00305	0.01171	0.02397	0.02831	0.01476	-0.00179	-0.01117	-0.02489	-0.0423	-0.04057	-0.0244
0.15035	0.02577	0.05088	0.04541	0.01795	-0.00398	-0.01195	-0.00904	-0.00642	-0.00513	0.00353	0.00489	-0.02133	-0.04329	-0.02479	0.01212	0.03835	0.02949	0.01001	0.00231	-0.000576497	-0.00115	0.00148	0.006	0.00612	0.0036	-0.000120896	-0.00669	-0.01798	-0.02251	-0.01601	-0.00799	0.00459	0.01966	0.01808	-0.00025897	-0.01039	-0.00309	0.00127	0.00312	0.01178	0.02408	0.02845	0.01485	-0.00183	-0.01125	-0.02488	-0.04213	-0.04028	-0.02415
0.15054	0.02569	0.0507	0.04508	0.01738	-0.00471	-0.01263	-0.00965	-0.00701	-0.00566	0.00313	0.00459	-0.02155	-0.04343	-0.02492	0.0119	0.03806	0.0293	0.00985	0.00209	-0.000744134	-0.00124	0.00151	0.00622	0.00653	0.00412	0.000302552	-0.00644	-0.01787	-0.02252	-0.01606	-0.00795	0.00476	0.01987	0.01817	-0.000412199	-0.01065	-0.00319	0.00133	0.00317	0.01184	0.02418	0.02858	0.01493	-0.00187	-0.01132	-0.02485	-0.04196	-0.03999	-0.02389
0.15072	0.0256	0.05051	0.04475	0.01682	-0.00543	-0.01331	-0.01025	-0.00759	-0.00619	0.00272	0.00428	-0.02178	-0.04358	-0.02504	0.01169	0.03778	0.02911	0.00969	0.00188	-0.000903944	-0.00133	0.00153	0.00643	0.00694	0.00465	0.000728261	-0.00619	-0.01775	-0.02253	-0.0161	-0.0079	0.00492	0.02007	0.01825	-0.000562865	-0.01091	-0.00328	0.00139	0.00323	0.01189	0.02428	0.0287	0.015	-0.00191	-0.01138	-0.02481	-0.04176	-0.03968	-0.02362
0.15091	0.02552	0.05033	0.04444	0.01626	-0.00614	-0.01397	-0.01085	-0.00817	-0.00673	0.00229	0.00395	-0.02202	-0.04373	-0.02517	0.01147	0.03751	0.02893	0.00954	0.00168	-0.00106	-0.00141	0.00156	0.00665	0.00736	0.00519	0.00116	-0.00594	-0.01763	-0.02254	-0.01615	-0.00786	0.00507	0.02027	0.01834	-0.000710825	-0.01117	-0.00336	0.00145	0.00328	0.01194	0.02437	0.02881	0.01507	-0.00195	-0.01144	-0.02477	-0.04156	-0.03937	-0.02334
0.15109	0.02544	0.05015	0.04413	0.01572	-0.00683	-0.01463	-0.01144	-0.00875	-0.00727	0.00186	0.00361	-0.02228	-0.04388	-0.02529	0.01126	0.03723	0.02876	0.0094	0.00148	-0.0012	-0.00149	0.00159	0.00687	0.00779	0.00572	0.00159	-0.00569	-0.01752	-0.02254	-0.0162	-0.00783	0.00522	0.02046	0.01842	-0.000855949	-0.01142	-0.00344	0.00151	0.00332	0.01199	0.02445	0.02891	0.01513	-0.00199	-0.0115	-0.02471	-0.04134	-0.03904	-0.02306
0.15127	0.02536	0.04997	0.04383	0.0152	-0.00751	-0.01527	-0.01202	-0.00932	-0.00781	0.00141	0.00326	-0.02254	-0.04403	-0.02542	0.01106	0.03697	0.02859	0.00926	0.0013	-0.00134	-0.00156	0.00162	0.00709	0.00821	0.00627	0.00202	-0.00545	-0.0174	-0.02254	-0.01624	-0.0078	0.00536	0.02064	0.0185	-0.000998105	-0.01166	-0.00352	0.00157	0.00336	0.01203	0.02453	0.029	0.01519	-0.00204	-0.01155	-0.02465	-0.04111	-0.0387	-0.02277
0.15146	0.02527	0.04979	0.04353	0.01468	-0.00818	-0.0159	-0.01259	-0.00989	-0.00836	0.000959118	0.00289	-0.02281	-0.04419	-0.02554	0.01085	0.03671	0.02843	0.00913	0.00112	-0.00146	-0.00162	0.00166	0.0073	0.00864	0.00681	0.00245	-0.0052	-0.01729	-0.02254	-0.01629	-0.00777	0.00549	0.02082	0.01857	-0.00114	-0.01189	-0.00359	0.00164	0.0034	0.01206	0.02459	0.02908	0.01524	-0.00208	-0.0116	-0.02457	-0.04086	-0.03835	-0.02246
0.15164	0.02519	0.04961	0.04324	0.01417	-0.00883	-0.01651	-0.01316	-0.01046	-0.00891	0.000495441	0.00251	-0.02309	-0.04435	-0.02566	0.01066	0.03645	0.02827	0.00901	0.000943439	-0.00158	-0.00169	0.00169	0.00752	0.00907	0.00736	0.00288	-0.00497	-0.01717	-0.02254	-0.01634	-0.00775	0.00562	0.021	0.01865	-0.00127	-0.01211	-0.00365	0.0017	0.00343	0.01208	0.02465	0.02916	0.01528	-0.00212	-0.01164	-0.02448	-0.0406	-0.03799	-0.02216
0.15183	0.02511	0.04944	0.04296	0.01368	-0.00946	-0.01711	-0.01371	-0.01103	-0.00945	2.31726e-05	0.00211	-0.02338	-0.04452	-0.02578	0.01046	0.0362	0.02812	0.0089	0.000778377	-0.0017	-0.00175	0.00172	0.00773	0.0095	0.00791	0.00331	-0.00473	-0.01706	-0.02253	-0.01638	-0.00773	0.00574	0.02116	0.01872	-0.00141	-0.01233	-0.00371	0.00176	0.00346	0.0121	0.0247	0.02922	0.01531	-0.00216	-0.01168	-0.02439	-0.04033	-0.03763	-0.02184
0.15201	0.02503	0.04927	0.04268	0.0132	-0.01008	-0.0177	-0.01425	-0.01158	-0.01	-0.000457202	0.00171	-0.02368	-0.04468	-0.0259	0.01027	0.03595	0.02798	0.00879	0.000621021	-0.0018	-0.0018	0.00175	0.00795	0.00993	0.00847	0.00374	-0.00449	-0.01695	-0.02253	-0.01642	-0.00771	0.00585	0.02132	0.01879	-0.00153	-0.01254	-0.00376	0.00182	0.00348	0.01212	0.02474	0.02927	0.01534	-0.00221	-0.01171	-0.02429	-0.04005	-0.03725	-0.02152
0.1522	0.02495	0.0491	0.04241	0.01274	-0.01069	-0.01827	-0.01479	-0.01213	-0.01055	-0.000945199	0.00129	-0.02399	-0.04485	-0.02602	0.01008	0.0357	0.02784	0.00868	0.000471463	-0.0019	-0.00185	0.00178	0.00816	0.01036	0.00902	0.00418	-0.00426	-0.01684	-0.02251	-0.01646	-0.0077	0.00596	0.02147	0.01886	-0.00166	-0.01274	-0.0038	0.00189	0.0035	0.01212	0.02478	0.02931	0.01536	-0.00225	-0.01174	-0.02417	-0.03975	-0.03686	-0.02119
0.15238	0.02487	0.04894	0.04215	0.01229	-0.01127	-0.01882	-0.01531	-0.01268	-0.01109	-0.00144	0.00086191	-0.0243	-0.04502	-0.02613	0.0099	0.03546	0.0277	0.00858	0.000329792	-0.00198	-0.00189	0.00182	0.00837	0.0108	0.00958	0.00461	-0.00404	-0.01672	-0.0225	-0.01651	-0.00769	0.00605	0.02162	0.01892	-0.00178	-0.01293	-0.00384	0.00195	0.00351	0.01212	0.0248	0.02934	0.01538	-0.0023	-0.01177	-0.02405	-0.03945	-0.03646	-0.02085
0.15257	0.02479	0.04877	0.0419	0.01185	-0.01184	-0.01936	-0.01581	-0.01322	-0.01164	-0.00194	0.000422131	-0.02462	-0.04519	-0.02624	0.00972	0.03523	0.02757	0.00849	0.000196099	-0.00206	-0.00193	0.00185	0.00858	0.01123	0.01014	0.00504	-0.00381	-0.01661	-0.02248	-0.01654	-0.00768	0.00614	0.02176	0.01898	-0.0019	-0.01311	-0.00387	0.00202	0.00353	0.01212	0.02482	0.02936	0.01539	-0.00234	-0.0118	-0.02392	-0.03913	-0.03605	-0.0205
0.15275	0.02471	0.04861	0.04165	0.01142	-0.01239	-0.01988	-0.01631	-0.01374	-0.01218	-0.00245	-2.79768e-05	-0.02495	-0.04536	-0.02635	0.00954	0.035	0.02745	0.00841	7.0453e-05	-0.00213	-0.00197	0.00188	0.00878	0.01167	0.01071	0.00547	-0.00359	-0.01651	-0.02246	-0.01658	-0.00768	0.00623	0.02189	0.01904	-0.00201	-0.01329	-0.00389	0.00208	0.00353	0.01211	0.02483	0.02937	0.01539	-0.00239	-0.01181	-0.02378	-0.0388	-0.03563	-0.02015
0.15294	0.02463	0.04845	0.04141	0.01101	-0.01293	-0.02039	-0.01679	-0.01426	-0.01272	-0.00296	-0.000487891	-0.02529	-0.04554	-0.02646	0.00937	0.03477	0.02733	0.00833	-4.71728e-05	-0.0022	-0.002	0.00191	0.00899	0.01211	0.01127	0.0059	-0.00338	-0.0164	-0.02244	-0.01662	-0.00768	0.0063	0.02201	0.01909	-0.00212	-0.01345	-0.0039	0.00215	0.00354	0.01209	0.02483	0.02937	0.01538	-0.00243	-0.01183	-0.02364	-0.03846	-0.03521	-0.01979
0.15312	0.02455	0.0483	0.04118	0.01062	-0.01345	-0.02087	-0.01726	-0.01477	-0.01326	-0.00348	-0.000957076	-0.02563	-0.04571	-0.02656	0.0092	0.03455	0.02722	0.00826	-0.000156827	-0.00225	-0.00202	0.00194	0.00919	0.01254	0.01183	0.00632	-0.00316	-0.01629	-0.02242	-0.01665	-0.00769	0.00637	0.02213	0.01915	-0.00223	-0.0136	-0.00391	0.00222	0.00354	0.01207	0.02482	0.02936	0.01537	-0.00248	-0.01184	-0.02348	-0.0381	-0.03478	-0.01943
0.15331	0.02447	0.04815	0.04096	0.01023	-0.01394	-0.02134	-0.01771	-0.01527	-0.01379	-0.00401	-0.00143	-0.02597	-0.04589	-0.02667	0.00904	0.03433	0.02711	0.00819	-0.000258557	-0.0023	-0.00205	0.00197	0.00939	0.01298	0.01239	0.00675	-0.00296	-0.01619	-0.02239	-0.01669	-0.0077	0.00643	0.02224	0.01919	-0.00233	-0.01375	-0.0039	0.00229	0.00353	0.01204	0.02481	0.02934	0.01535	-0.00252	-0.01185	-0.02332	-0.03774	-0.03433	-0.01905
0.15349	0.02439	0.048	0.04075	0.00987	-0.01442	-0.0218	-0.01815	-0.01576	-0.01432	-0.00453	-0.00192	-0.02632	-0.04606	-0.02676	0.00888	0.03412	0.027	0.00813	-0.000352413	-0.00234	-0.00207	0.00201	0.00959	0.01341	0.01296	0.00717	-0.00275	-0.01609	-0.02236	-0.01672	-0.00771	0.00648	0.02234	0.01924	-0.00243	-0.01388	-0.00389	0.00237	0.00353	0.012	0.02479	0.02931	0.01533	-0.00257	-0.01186	-0.02315	-0.03737	-0.03388	-0.01868
0.15368	0.02432	0.04785	0.04054	0.00952	-0.01488	-0.02223	-0.01857	-0.01624	-0.01484	-0.00506	-0.00241	-0.02668	-0.04623	-0.02686	0.00873	0.03391	0.0269	0.00807	-0.000438442	-0.00237	-0.00208	0.00204	0.00979	0.01385	0.01352	0.00759	-0.00255	-0.01598	-0.02233	-0.01674	-0.00772	0.00652	0.02243	0.01928	-0.00252	-0.014	-0.00387	0.00244	0.00352	0.01196	0.02475	0.02927	0.01529	-0.00262	-0.01187	-0.02298	-0.03698	-0.03343	-0.01829
0.15386	0.02424	0.0477	0.04034	0.00918	-0.01533	-0.02264	-0.01898	-0.01671	-0.01536	-0.0056	-0.00292	-0.02704	-0.04641	-0.02696	0.00857	0.0337	0.0268	0.00802	-0.000516694	-0.00239	-0.00209	0.00206	0.00998	0.01428	0.01408	0.008	-0.00236	-0.01589	-0.02229	-0.01677	-0.00774	0.00656	0.02251	0.01932	-0.00261	-0.01411	-0.00384	0.00252	0.0035	0.01191	0.02472	0.02922	0.01526	-0.00267	-0.01187	-0.02279	-0.03659	-0.03296	-0.0179
0.15405	0.02417	0.04756	0.04015	0.00886	-0.01575	-0.02304	-0.01937	-0.01716	-0.01587	-0.00613	-0.00342	-0.0274	-0.04658	-0.02705	0.00843	0.0335	0.02671	0.00798	-0.000587217	-0.00241	-0.0021	0.00209	0.01017	0.01471	0.01464	0.00841	-0.00217	-0.01579	-0.02225	-0.01679	-0.00775	0.00658	0.02259	0.01935	-0.0027	-0.01422	-0.0038	0.0026	0.00349	0.01186	0.02467	0.02916	0.01521	-0.00272	-0.01187	-0.0226	-0.03619	-0.03249	-0.01751
0.15423	0.02409	0.04742	0.03997	0.00855	-0.01615	-0.02342	-0.01974	-0.0176	-0.01638	-0.00667	-0.00394	-0.02777	-0.04675	-0.02713	0.00829	0.03329	0.02662	0.00794	-0.00065006	-0.00241	-0.0021	0.00212	0.01036	0.01514	0.0152	0.00882	-0.00198	-0.0157	-0.02221	-0.01681	-0.00778	0.0066	0.02265	0.01938	-0.00278	-0.01431	-0.00376	0.00268	0.00347	0.0118	0.02461	0.02909	0.01516	-0.00277	-0.01186	-0.02241	-0.03578	-0.03201	-0.01711
0.15441	0.02402	0.04729	0.0398	0.00826	-0.01654	-0.02377	-0.0201	-0.01803	-0.01688	-0.00721	-0.00446	-0.02814	-0.04692	-0.02722	0.00815	0.0331	0.02653	0.0079	-0.000705271	-0.00241	-0.0021	0.00215	0.01054	0.01556	0.01575	0.00923	-0.00181	-0.0156	-0.02217	-0.01683	-0.0078	0.00661	0.02271	0.01941	-0.00285	-0.01439	-0.0037	0.00276	0.00345	0.01174	0.02455	0.02901	0.0151	-0.00282	-0.01186	-0.0222	-0.03536	-0.03152	-0.01671
0.1546	0.02394	0.04716	0.03964	0.00799	-0.0169	-0.02411	-0.02044	-0.01844	-0.01737	-0.00775	-0.00498	-0.02851	-0.04709	-0.0273	0.00802	0.0329	0.02644	0.00787	-0.0007529	-0.00241	-0.0021	0.00217	0.01072	0.01599	0.01631	0.00963	-0.00163	-0.01551	-0.02212	-0.01684	-0.00783	0.00662	0.02276	0.01943	-0.00293	-0.01446	-0.00364	0.00285	0.00342	0.01167	0.02448	0.02892	0.01504	-0.00287	-0.01185	-0.022	-0.03493	-0.03103	-0.0163
0.15478	0.02387	0.04703	0.03948	0.00773	-0.01724	-0.02443	-0.02076	-0.01884	-0.01785	-0.00829	-0.00551	-0.02888	-0.04726	-0.02738	0.00789	0.03271	0.02635	0.00784	-0.000793008	-0.00239	-0.00209	0.0022	0.0109	0.01641	0.01686	0.01002	-0.00146	-0.01543	-0.02208	-0.01685	-0.00785	0.00661	0.0228	0.01945	-0.003	-0.01452	-0.00356	0.00294	0.00339	0.0116	0.0244	0.02882	0.01497	-0.00293	-0.01184	-0.02178	-0.0345	-0.03054	-0.01588
0.15497	0.02379	0.0469	0.03934	0.00749	-0.01757	-0.02472	-0.02106	-0.01923	-0.01832	-0.00883	-0.00604	-0.02926	-0.04743	-0.02745	0.00776	0.03252	0.02627	0.00782	-0.000825723	-0.00237	-0.00208	0.00222	0.01107	0.01683	0.0174	0.01042	-0.0013	-0.01534	-0.02202	-0.01686	-0.00788	0.0066	0.02283	0.01946	-0.00306	-0.01456	-0.00348	0.00303	0.00336	0.01152	0.02432	0.02872	0.01489	-0.00298	-0.01183	-0.02157	-0.03405	-0.03003	-0.01547
0.15515	0.02372	0.04677	0.0392	0.00726	-0.01787	-0.025	-0.02134	-0.01959	-0.01878	-0.00937	-0.00658	-0.02963	-0.04759	-0.02752	0.00764	0.03233	0.02619	0.0078	-0.000851183	-0.00234	-0.00206	0.00224	0.01124	0.01725	0.01795	0.0108	-0.00114	-0.01526	-0.02197	-0.01687	-0.00791	0.00658	0.02285	0.01947	-0.00312	-0.0146	-0.00339	0.00312	0.00333	0.01143	0.02423	0.0286	0.01481	-0.00304	-0.01182	-0.02134	-0.0336	-0.02952	-0.01504
0.15534	0.02365	0.04665	0.03907	0.00705	-0.01815	-0.02525	-0.02161	-0.01995	-0.01923	-0.00991	-0.00711	-0.03001	-0.04775	-0.02758	0.00753	0.03215	0.02611	0.00778	-0.000869527	-0.0023	-0.00205	0.00226	0.01141	0.01766	0.01849	0.01118	-0.000993682	-0.01518	-0.02192	-0.01687	-0.00795	0.00655	0.02286	0.01948	-0.00318	-0.01463	-0.00329	0.00322	0.0033	0.01134	0.02413	0.02848	0.01472	-0.00309	-0.01181	-0.02112	-0.03315	-0.02901	-0.01462
0.15552	0.02358	0.04654	0.03895	0.00686	-0.01841	-0.02549	-0.02185	-0.02028	-0.01968	-0.01044	-0.00765	-0.03038	-0.04791	-0.02765	0.00741	0.03196	0.02603	0.00777	-0.000880897	-0.00226	-0.00203	0.00228	0.01157	0.01807	0.01903	0.01156	-0.000848752	-0.01511	-0.02186	-0.01687	-0.00798	0.00651	0.02286	0.01948	-0.00324	-0.01464	-0.00317	0.00332	0.00326	0.01125	0.02402	0.02834	0.01463	-0.00315	-0.01179	-0.02089	-0.03268	-0.02849	-0.01419
0.15571	0.02351	0.04642	0.03884	0.00668	-0.01865	-0.0257	-0.02208	-0.0206	-0.02011	-0.01098	-0.0082	-0.03076	-0.04806	-0.0277	0.00731	0.03178	0.02595	0.00776	-0.00088543	-0.00221	-0.002	0.00229	0.01172	0.01847	0.01956	0.01193	-0.000709886	-0.01504	-0.0218	-0.01686	-0.00802	0.00646	0.02285	0.01947	-0.00329	-0.01465	-0.00305	0.00342	0.00322	0.01115	0.02391	0.0282	0.01453	-0.00321	-0.01178	-0.02065	-0.03221	-0.02797	-0.01376
0.15589	0.02344	0.04631	0.03873	0.00651	-0.01887	-0.02589	-0.02228	-0.0209	-0.02053	-0.01151	-0.00874	-0.03113	-0.04821	-0.02776	0.0072	0.0316	0.02587	0.00776	-0.000883268	-0.00215	-0.00198	0.00231	0.01188	0.01888	0.02009	0.0123	-0.00057719	-0.01497	-0.02173	-0.01685	-0.00805	0.00641	0.02283	0.01946	-0.00333	-0.01464	-0.00293	0.00353	0.00318	0.01105	0.02379	0.02805	0.01442	-0.00327	-0.01176	-0.02041	-0.03174	-0.02744	-0.01332
0.15608	0.02337	0.0462	0.03864	0.00636	-0.01907	-0.02606	-0.02247	-0.02118	-0.02093	-0.01203	-0.00928	-0.0315	-0.04836	-0.02781	0.0071	0.03142	0.02579	0.00775	-0.00087455	-0.00209	-0.00195	0.00232	0.01202	0.01927	0.02061	0.01265	-0.000450764	-0.0149	-0.02167	-0.01684	-0.00809	0.00635	0.0228	0.01944	-0.00338	-0.01463	-0.00279	0.00363	0.00313	0.01094	0.02366	0.02789	0.01431	-0.00333	-0.01175	-0.02017	-0.03126	-0.02691	-0.01288
0.15626	0.0233	0.0461	0.03855	0.00623	-0.01926	-0.02621	-0.02263	-0.02145	-0.02133	-0.01256	-0.00983	-0.03187	-0.0485	-0.02785	0.007	0.03124	0.02571	0.00775	-0.000859415	-0.00202	-0.00192	0.00233	0.01217	0.01967	0.02113	0.01301	-0.000330715	-0.01484	-0.0216	-0.01682	-0.00813	0.00628	0.02276	0.01942	-0.00342	-0.0146	-0.00264	0.00375	0.00309	0.01082	0.02352	0.02772	0.0142	-0.0034	-0.01173	-0.01993	-0.03077	-0.02637	-0.01244
0.15645	0.02324	0.04599	0.03847	0.00611	-0.01941	-0.02634	-0.02277	-0.02169	-0.02171	-0.01308	-0.01037	-0.03224	-0.04864	-0.0279	0.00691	0.03107	0.02563	0.00775	-0.000838004	-0.00195	-0.00189	0.00234	0.01231	0.02006	0.02164	0.01335	-0.000217143	-0.01478	-0.02153	-0.01679	-0.00816	0.0062	0.02271	0.01939	-0.00346	-0.01457	-0.00248	0.00386	0.00304	0.01071	0.02338	0.02755	0.01408	-0.00346	-0.01172	-0.01969	-0.03028	-0.02583	-0.012
0.15663	0.02317	0.0459	0.0384	0.00601	-0.01955	-0.02644	-0.0229	-0.02192	-0.02208	-0.01359	-0.01091	-0.0326	-0.04877	-0.02793	0.00682	0.03089	0.02555	0.00775	-0.000810456	-0.00186	-0.00186	0.00234	0.01244	0.02044	0.02215	0.01369	-0.000110154	-0.01472	-0.02146	-0.01677	-0.0082	0.00612	0.02265	0.01935	-0.00349	-0.01452	-0.00232	0.00398	0.00299	0.01059	0.02324	0.02737	0.01395	-0.00353	-0.0117	-0.01944	-0.02979	-0.02529	-0.01155
0.15682	0.02311	0.0458	0.03834	0.00593	-0.01967	-0.02653	-0.023	-0.02213	-0.02243	-0.0141	-0.01145	-0.03296	-0.0489	-0.02796	0.00674	0.03071	0.02547	0.00776	-0.000776917	-0.00178	-0.00182	0.00235	0.01257	0.02082	0.02265	0.01403	-9.83951e-06	-0.01467	-0.02138	-0.01674	-0.00824	0.00602	0.02258	0.01931	-0.00352	-0.01447	-0.00215	0.0041	0.00294	0.01046	0.02308	0.02718	0.01382	-0.00359	-0.01169	-0.01919	-0.02929	-0.02474	-0.0111
0.157	0.02304	0.04571	0.03829	0.00586	-0.01977	-0.02659	-0.02308	-0.02231	-0.02277	-0.0146	-0.01198	-0.03331	-0.04903	-0.02799	0.00665	0.03054	0.02539	0.00777	-0.000737556	-0.00168	-0.00178	0.00235	0.01269	0.02119	0.02315	0.01435	8.37478e-05	-0.01462	-0.02131	-0.0167	-0.00828	0.00592	0.02249	0.01926	-0.00355	-0.0144	-0.00196	0.00422	0.00289	0.01033	0.02292	0.02698	0.01369	-0.00366	-0.01168	-0.01894	-0.02879	-0.0242	-0.01065
0.15719	0.02298	0.04562	0.03824	0.0058	-0.01985	-0.02663	-0.02313	-0.02248	-0.0231	-0.01509	-0.01252	-0.03366	-0.04914	-0.02802	0.00657	0.03036	0.0253	0.00777	-0.000692549	-0.00159	-0.00174	0.00235	0.01281	0.02156	0.02364	0.01467	0.000170566	-0.01458	-0.02123	-0.01666	-0.00831	0.00582	0.0224	0.0192	-0.00358	-0.01433	-0.00177	0.00434	0.00284	0.0102	0.02276	0.02678	0.01355	-0.00373	-0.01166	-0.01869	-0.02828	-0.02365	-0.0102
0.15737	0.02292	0.04553	0.03821	0.00576	-0.01991	-0.02665	-0.02317	-0.02263	-0.02341	-0.01558	-0.01305	-0.03401	-0.04926	-0.02804	0.0065	0.03018	0.02521	0.00778	-0.000642071	-0.00148	-0.0017	0.00234	0.01292	0.02192	0.02412	0.01498	0.000250574	-0.01453	-0.02115	-0.01661	-0.00835	0.0057	0.02229	0.01914	-0.0036	-0.01424	-0.00157	0.00447	0.00279	0.01006	0.02259	0.02657	0.0134	-0.00381	-0.01165	-0.01844	-0.02778	-0.0231	-0.00975
0.15755	0.02285	0.04545	0.03818	0.00573	-0.01995	-0.02665	-0.02319	-0.02276	-0.0237	-0.01606	-0.01357	-0.03435	-0.04936	-0.02805	0.00642	0.03001	0.02512	0.00779	-0.000586298	-0.00137	-0.00166	0.00233	0.01303	0.02228	0.02459	0.01528	0.00032373	-0.0145	-0.02106	-0.01656	-0.00839	0.00558	0.02218	0.01907	-0.00363	-0.01415	-0.00137	0.0046	0.00273	0.00992	0.02241	0.02636	0.01326	-0.00388	-0.01164	-0.01819	-0.02727	-0.02254	-0.0093
0.15774	0.02279	0.04537	0.03816	0.00572	-0.01997	-0.02663	-0.02318	-0.02286	-0.02398	-0.01653	-0.01409	-0.03468	-0.04946	-0.02806	0.00635	0.02983	0.02503	0.0078	-0.000525405	-0.00126	-0.00162	0.00232	0.01313	0.02263	0.02506	0.01558	0.000389991	-0.01446	-0.02098	-0.0165	-0.00842	0.00545	0.02205	0.019	-0.00365	-0.01405	-0.00115	0.00473	0.00267	0.00977	0.02223	0.02614	0.0131	-0.00396	-0.01163	-0.01794	-0.02676	-0.02199	-0.00884
0.15792	0.02274	0.0453	0.03814	0.00572	-0.01997	-0.02658	-0.02315	-0.02295	-0.02424	-0.01699	-0.01461	-0.03501	-0.04956	-0.02806	0.00629	0.02965	0.02494	0.00781	-0.000459567	-0.00114	-0.00158	0.00231	0.01323	0.02297	0.02552	0.01587	0.000449316	-0.01443	-0.02089	-0.01644	-0.00846	0.00531	0.02191	0.01891	-0.00367	-0.01394	-0.000933628	0.00487	0.00262	0.00962	0.02204	0.02591	0.01295	-0.00403	-0.01163	-0.01769	-0.02625	-0.02144	-0.00839
0.15811	0.02268	0.04523	0.03814	0.00573	-0.01995	-0.02652	-0.0231	-0.02301	-0.02449	-0.01745	-0.01512	-0.03533	-0.04965	-0.02806	0.00622	0.02947	0.02484	0.00782	-0.00038896	-0.00102	-0.00153	0.00229	0.01332	0.02331	0.02598	0.01615	0.000501663	-0.0144	-0.0208	-0.01638	-0.00849	0.00517	0.02176	0.01882	-0.00369	-0.01382	-0.000705936	0.00501	0.00256	0.00947	0.02185	0.02568	0.01279	-0.00411	-0.01162	-0.01745	-0.02573	-0.02088	-0.00793
0.15829	0.02262	0.04516	0.03814	0.00576	-0.01991	-0.02643	-0.02303	-0.02305	-0.02472	-0.01789	-0.01562	-0.03564	-0.04973	-0.02806	0.00616	0.02929	0.02474	0.00784	-0.000313759	-0.000894163	-0.00149	0.00227	0.0134	0.02364	0.02642	0.01642	0.000546991	-0.01438	-0.02071	-0.0163	-0.00852	0.00502	0.0216	0.01872	-0.0037	-0.01369	-0.000471607	0.00514	0.0025	0.00931	0.02165	0.02544	0.01263	-0.0042	-0.01162	-0.0172	-0.02522	-0.02033	-0.00748
0.15848	0.02257	0.0451	0.03814	0.0058	-0.01986	-0.02632	-0.02293	-0.02308	-0.02493	-0.01832	-0.01611	-0.03595	-0.0498	-0.02805	0.0061	0.02911	0.02464	0.00785	-0.00023414	-0.000763143	-0.00144	0.00224	0.01348	0.02397	0.02686	0.01668	0.000585257	-0.01436	-0.02062	-0.01623	-0.00855	0.00486	0.02143	0.01862	-0.00372	-0.01356	-0.00023091	0.00529	0.00244	0.00916	0.02145	0.0252	0.01246	-0.00428	-0.01162	-0.01695	-0.02471	-0.01977	-0.00702
0.15866	0.02251	0.04503	0.03816	0.00586	-0.01979	-0.0262	-0.02282	-0.02308	-0.02512	-0.01874	-0.0166	-0.03624	-0.04987	-0.02803	0.00605	0.02892	0.02453	0.00786	-0.000150277	-0.000628162	-0.00139	0.00222	0.01356	0.02429	0.02729	0.01694	0.00061642	-0.01435	-0.02053	-0.01614	-0.00858	0.00469	0.02124	0.0185	-0.00373	-0.01342	1.58829e-05	0.00543	0.00237	0.00899	0.02124	0.02495	0.01229	-0.00436	-0.01162	-0.01671	-0.02419	-0.01922	-0.00657
0.15885	0.02246	0.04498	0.03818	0.00592	-0.01969	-0.02605	-0.02268	-0.02305	-0.0253	-0.01916	-0.01708	-0.03653	-0.04993	-0.02801	0.00599	0.02874	0.02442	0.00787	-6.23485e-05	-0.000489407	-0.00135	0.00219	0.01363	0.0246	0.02771	0.01719	0.000640445	-0.01433	-0.02043	-0.01605	-0.0086	0.00452	0.02105	0.01838	-0.00375	-0.01327	0.000268478	0.00557	0.00231	0.00883	0.02103	0.0247	0.01212	-0.00445	-0.01163	-0.01647	-0.02368	-0.01866	-0.00612
0.15903	0.02241	0.04492	0.03821	0.006	-0.01959	-0.02588	-0.02252	-0.02301	-0.02546	-0.01956	-0.01755	-0.03681	-0.04998	-0.02799	0.00594	0.02855	0.0243	0.00788	2.94674e-05	-0.000347076	-0.0013	0.00215	0.01369	0.0249	0.02812	0.01743	0.00065733	-0.01433	-0.02033	-0.01596	-0.00862	0.00434	0.02084	0.01825	-0.00376	-0.01312	0.000526473	0.00572	0.00225	0.00866	0.02082	0.02445	0.01194	-0.00454	-0.01163	-0.01623	-0.02317	-0.01811	-0.00566
0.15922	0.02236	0.04487	0.03824	0.00609	-0.01946	-0.0257	-0.02234	-0.02294	-0.0256	-0.01994	-0.01801	-0.03707	-0.05002	-0.02796	0.00589	0.02836	0.02418	0.00789	0.00012499	-0.00020137	-0.00125	0.00211	0.01374	0.0252	0.02852	0.01766	0.000667078	-0.01432	-0.02023	-0.01586	-0.00864	0.00416	0.02062	0.01811	-0.00378	-0.01296	0.000789444	0.00587	0.00218	0.00849	0.0206	0.02419	0.01177	-0.00463	-0.01165	-0.016	-0.02266	-0.01755	-0.00521
0.1594	0.02231	0.04482	0.03828	0.00619	-0.01932	-0.02549	-0.02213	-0.02285	-0.02572	-0.02032	-0.01846	-0.03733	-0.05005	-0.02792	0.00584	0.02817	0.02406	0.0079	0.000224038	-5.24904e-05	-0.00121	0.00207	0.0138	0.02549	0.02891	0.01788	0.000669695	-0.01432	-0.02013	-0.01575	-0.00866	0.00397	0.02039	0.01796	-0.00379	-0.01279	0.00106	0.00601	0.00211	0.00832	0.02037	0.02392	0.01159	-0.00472	-0.01166	-0.01577	-0.02216	-0.017	-0.00476
0.15959	0.02226	0.04478	0.03833	0.0063	-0.01916	-0.02526	-0.02191	-0.02274	-0.02582	-0.02068	-0.0189	-0.03758	-0.05008	-0.02788	0.00579	0.02797	0.02393	0.0079	0.000326432	9.93631e-05	-0.00116	0.00203	0.01384	0.02577	0.0293	0.01809	0.000665184	-0.01433	-0.02003	-0.01564	-0.00867	0.00378	0.02015	0.01781	-0.0038	-0.01262	0.00133	0.00616	0.00205	0.00814	0.02015	0.02366	0.0114	-0.00482	-0.01168	-0.01554	-0.02165	-0.01646	-0.00431
0.15977	0.02222	0.04474	0.03838	0.00642	-0.01899	-0.02502	-0.02166	-0.02261	-0.0259	-0.02103	-0.01933	-0.03781	-0.05009	-0.02784	0.00575	0.02778	0.0238	0.00791	0.000431992	0.000253989	-0.00112	0.00198	0.01388	0.02605	0.02967	0.01829	0.00065355	-0.01434	-0.01992	-0.01552	-0.00869	0.00357	0.0199	0.01765	-0.00382	-0.01244	0.0016	0.00631	0.00198	0.00797	0.01992	0.02339	0.01122	-0.00492	-0.0117	-0.01532	-0.02115	-0.01591	-0.00387
0.15996	0.02218	0.0447	0.03844	0.00655	-0.0188	-0.02475	-0.0214	-0.02246	-0.02597	-0.02136	-0.01975	-0.03804	-0.0501	-0.02779	0.00571	0.02758	0.02367	0.00792	0.000540535	0.000411187	-0.00107	0.00193	0.01391	0.02632	0.03004	0.01849	0.000634796	-0.01435	-0.01982	-0.0154	-0.00869	0.00337	0.01964	0.01748	-0.00383	-0.01226	0.00188	0.00646	0.00191	0.00779	0.01969	0.02312	0.01103	-0.00501	-0.01172	-0.0151	-0.02065	-0.01537	-0.00342
0.16014	0.02213	0.04467	0.0385	0.0067	-0.01859	-0.02447	-0.02111	-0.02228	-0.02602	-0.02168	-0.02016	-0.03825	-0.0501	-0.02773	0.00566	0.02738	0.02353	0.00792	0.000651883	0.000570756	-0.00103	0.00187	0.01394	0.02658	0.03039	0.01867	0.000608929	-0.01437	-0.01971	-0.01527	-0.0087	0.00316	0.01936	0.0173	-0.00385	-0.01208	0.00216	0.00661	0.00184	0.00761	0.01945	0.02285	0.01084	-0.00512	-0.01175	-0.01489	-0.02015	-0.01483	-0.00298
0.16033	0.02209	0.04464	0.03857	0.00684	-0.01837	-0.02417	-0.0208	-0.02208	-0.02604	-0.02199	-0.02055	-0.03845	-0.05009	-0.02767	0.00562	0.02717	0.02338	0.00792	0.000765854	0.000732495	-0.0009855	0.00181	0.01396	0.02683	0.03074	0.01885	0.000575951	-0.01439	-0.0196	-0.01514	-0.0087	0.00294	0.01908	0.01711	-0.00386	-0.01189	0.00245	0.00676	0.00177	0.00742	0.01921	0.02257	0.01065	-0.00522	-0.01178	-0.01468	-0.01966	-0.01429	-0.00254
0.16051	0.02205	0.04461	0.03864	0.007	-0.01814	-0.02385	-0.02047	-0.02186	-0.02605	-0.02228	-0.02093	-0.03864	-0.05006	-0.0276	0.00558	0.02696	0.02323	0.00793	0.000882268	0.000896203	-0.000943433	0.00174	0.01397	0.02707	0.03107	0.01902	0.000535868	-0.01441	-0.01949	-0.01499	-0.0087	0.00272	0.01878	0.01691	-0.00388	-0.01169	0.00273	0.00691	0.0017	0.00724	0.01897	0.0223	0.01046	-0.00532	-0.01182	-0.01447	-0.01917	-0.01375	-0.00211
0.16069	0.02202	0.04459	0.03872	0.00717	-0.0179	-0.02352	-0.02012	-0.02162	-0.02604	-0.02256	-0.0213	-0.03881	-0.05003	-0.02753	0.00555	0.02675	0.02308	0.00792	0.001	0.00106	-0.000902511	0.00167	0.01398	0.02731	0.0314	0.01917	0.000488683	-0.01444	-0.01938	-0.01485	-0.00869	0.00249	0.01848	0.0167	-0.0039	-0.0115	0.00302	0.00706	0.00162	0.00705	0.01873	0.02202	0.01027	-0.00543	-0.01186	-0.01428	-0.01869	-0.01322	-0.00167
0.16088	0.02198	0.04456	0.0388	0.00734	-0.01764	-0.02317	-0.01975	-0.02136	-0.02601	-0.02282	-0.02165	-0.03897	-0.04999	-0.02746	0.00551	0.02654	0.02292	0.00792	0.00112	0.00123	-0.000862861	0.0016	0.01399	0.02754	0.03171	0.01932	0.000434408	-0.01448	-0.01927	-0.01469	-0.00868	0.00226	0.01816	0.01649	-0.00392	-0.0113	0.00331	0.00721	0.00155	0.00686	0.01849	0.02174	0.01008	-0.00554	-0.01191	-0.01408	-0.01821	-0.0127	-0.00124
0.16106	0.02195	0.04455	0.03888	0.00752	-0.01737	-0.0228	-0.01936	-0.02108	-0.02596	-0.02307	-0.02199	-0.03912	-0.04994	-0.02737	0.00547	0.02633	0.02276	0.00792	0.00124	0.0014	-0.000824577	0.00153	0.01399	0.02776	0.03202	0.01946	0.000373078	-0.01451	-0.01916	-0.01453	-0.00867	0.00203	0.01783	0.01627	-0.00395	-0.0111	0.0036	0.00735	0.00147	0.00667	0.01824	0.02146	0.00988	-0.00565	-0.01196	-0.0139	-0.01774	-0.01218	-0.000817731
0.16125	0.02192	0.04453	0.03897	0.00771	-0.01708	-0.02241	-0.01896	-0.02077	-0.02589	-0.0233	-0.02231	-0.03925	-0.04987	-0.02729	0.00544	0.02611	0.02259	0.00791	0.00137	0.00157	-0.000787745	0.00145	0.01398	0.02797	0.03231	0.01959	0.000304737	-0.01455	-0.01904	-0.01437	-0.00865	0.00179	0.0175	0.01604	-0.00397	-0.0109	0.00389	0.0075	0.0014	0.00648	0.018	0.02118	0.00969	-0.00576	-0.01201	-0.01372	-0.01727	-0.01166	-0.00039551
0.16143	0.02189	0.04452	0.03906	0.0079	-0.01679	-0.02201	-0.01853	-0.02045	-0.0258	-0.02351	-0.02262	-0.03937	-0.0498	-0.02719	0.0054	0.02588	0.02241	0.00791	0.00149	0.00174	-0.000752449	0.00136	0.01396	0.02818	0.0326	0.01971	0.000229427	-0.0146	-0.01893	-0.0142	-0.00862	0.00155	0.01715	0.0158	-0.004	-0.01069	0.00418	0.00764	0.00132	0.00628	0.01775	0.0209	0.0095	-0.00587	-0.01207	-0.01355	-0.01681	-0.01115	2.26427e-05
0.16162	0.02186	0.04451	0.03915	0.0081	-0.01649	-0.0216	-0.01808	-0.0201	-0.0257	-0.02371	-0.02292	-0.03947	-0.04972	-0.02709	0.00537	0.02566	0.02224	0.0079	0.00162	0.00191	-0.000718775	0.00127	0.01394	0.02837	0.03287	0.01982	0.000147191	-0.01465	-0.01881	-0.01402	-0.00859	0.00131	0.01679	0.01555	-0.00402	-0.01049	0.00447	0.00778	0.00124	0.00609	0.0175	0.02062	0.0093	-0.00599	-0.01213	-0.01338	-0.01636	-0.01064	0.000436494
0.1618	0.02183	0.04451	0.03925	0.0083	-0.01617	-0.02116	-0.01762	-0.01973	-0.02557	-0.02389	-0.02319	-0.03956	-0.04962	-0.02699	0.00533	0.02543	0.02205	0.00789	0.00175	0.00208	-0.00068681	0.00118	0.01392	0.02856	0.03313	0.01992	5.80713e-05	-0.0147	-0.0187	-0.01384	-0.00856	0.00106	0.01643	0.0153	-0.00405	-0.01028	0.00475	0.00792	0.00116	0.00589	0.01725	0.02034	0.00911	-0.00611	-0.0122	-0.01322	-0.01591	-0.01014	0.000845809
0.16199	0.02181	0.04451	0.03935	0.0085	-0.01585	-0.02072	-0.01713	-0.01935	-0.02542	-0.02405	-0.02346	-0.03963	-0.04951	-0.02688	0.0053	0.0252	0.02187	0.00787	0.00188	0.00225	-0.000656638	0.00109	0.01389	0.02874	0.03338	0.02001	-3.78887e-05	-0.01476	-0.01858	-0.01365	-0.00852	0.000809104	0.01605	0.01503	-0.00409	-0.01007	0.00504	0.00805	0.00108	0.0057	0.017	0.02007	0.00891	-0.00623	-0.01227	-0.01307	-0.01547	-0.00965	0.00125
0.16217	0.02179	0.04451	0.03945	0.00871	-0.01551	-0.02026	-0.01663	-0.01894	-0.02526	-0.0242	-0.0237	-0.03969	-0.04939	-0.02677	0.00527	0.02496	0.02168	0.00786	0.00201	0.00243	-0.000628345	0.000985725	0.01385	0.02892	0.03362	0.0201	-0.000140647	-0.01482	-0.01846	-0.01345	-0.00848	0.000556586	0.01567	0.01476	-0.00412	-0.00987	0.00532	0.00819	0.000994453	0.0055	0.01674	0.01979	0.00872	-0.00635	-0.01234	-0.01293	-0.01504	-0.00916	0.00165
0.16236	0.02177	0.04451	0.03955	0.00893	-0.01517	-0.01979	-0.01612	-0.01852	-0.02508	-0.02433	-0.02393	-0.03973	-0.04927	-0.02665	0.00523	0.02473	0.02148	0.00784	0.00214	0.0026	-0.000602016	0.00088227	0.01381	0.02908	0.03385	0.02017	-0.00025016	-0.01488	-0.01834	-0.01325	-0.00843	0.000301951	0.01528	0.01448	-0.00416	-0.00966	0.0056	0.00831	0.000909361	0.0053	0.01649	0.01951	0.00853	-0.00647	-0.01242	-0.01279	-0.01461	-0.00868	0.00204
0.16254	0.02175	0.04452	0.03965	0.00914	-0.01482	-0.0193	-0.01558	-0.01807	-0.02488	-0.02444	-0.02414	-0.03975	-0.04912	-0.02652	0.0052	0.02448	0.02128	0.00782	0.00227	0.00277	-0.000577738	0.000775055	0.01376	0.02923	0.03407	0.02023	-0.000366385	-0.01495	-0.01822	-0.01305	-0.00838	4.54765e-05	0.01488	0.01419	-0.0042	-0.00945	0.00588	0.00844	0.000822607	0.0051	0.01624	0.01924	0.00833	-0.00659	-0.01251	-0.01266	-0.0142	-0.0082	0.00243
0.16273	0.02174	0.04453	0.03975	0.00936	-0.01447	-0.01881	-0.01503	-0.01761	-0.02465	-0.02454	-0.02433	-0.03976	-0.04897	-0.02639	0.00517	0.02424	0.02108	0.0078	0.00241	0.00294	-0.000555596	0.000664104	0.01371	0.02938	0.03428	0.02029	-0.00048928	-0.01503	-0.0181	-0.01283	-0.00832	-0.00021256	0.01447	0.0139	-0.00425	-0.00925	0.00615	0.00856	0.000734122	0.0049	0.01599	0.01897	0.00814	-0.00672	-0.0126	-0.01254	-0.01379	-0.00774	0.00282
0.16291	0.02172	0.04454	0.03986	0.00958	-0.0141	-0.0183	-0.01447	-0.01713	-0.02442	-0.02461	-0.02451	-0.03975	-0.04881	-0.02626	0.00513	0.02399	0.02087	0.00778	0.00254	0.00311	-0.000535667	0.000549454	0.01365	0.02952	0.03448	0.02033	-0.000618791	-0.0151	-0.01798	-0.01262	-0.00826	-0.000471878	0.01406	0.0136	-0.00429	-0.00905	0.00642	0.00867	0.000643831	0.0047	0.01574	0.0187	0.00795	-0.00684	-0.0127	-0.01243	-0.01339	-0.00728	0.00319
0.1631	0.02171	0.04456	0.03996	0.0098	-0.01373	-0.01778	-0.01388	-0.01663	-0.02416	-0.02467	-0.02467	-0.03973	-0.04863	-0.02612	0.0051	0.02374	0.02066	0.00776	0.00267	0.00329	-0.000517998	0.00043118	0.01359	0.02965	0.03466	0.02037	-0.00075482	-0.01519	-0.01786	-0.01239	-0.00819	-0.000732183	0.01363	0.01329	-0.00434	-0.00885	0.00668	0.00878	0.000551632	0.0045	0.01549	0.01843	0.00777	-0.00697	-0.0128	-0.01233	-0.013	-0.00683	0.00356
0.16328	0.0217	0.04458	0.04007	0.01002	-0.01336	-0.01725	-0.01329	-0.01611	-0.02389	-0.02471	-0.0248	-0.03969	-0.04844	-0.02597	0.00507	0.02349	0.02044	0.00773	0.00281	0.00346	-0.000502627	0.000309367	0.01352	0.02977	0.03484	0.02039	-0.000897255	-0.01527	-0.01774	-0.01217	-0.00811	-0.000993174	0.01321	0.01297	-0.0044	-0.00865	0.00694	0.00889	0.000457417	0.0043	0.01524	0.01816	0.00758	-0.0071	-0.0129	-0.01223	-0.01262	-0.00638	0.00393
0.16347	0.0217	0.0446	0.04017	0.01024	-0.01298	-0.0167	-0.01268	-0.01558	-0.02359	-0.02474	-0.02492	-0.03963	-0.04824	-0.02582	0.00503	0.02323	0.02022	0.0077	0.00294	0.00362	-0.000489591	0.0001841	0.01345	0.02989	0.035	0.02041	-0.00105	-0.01536	-0.01762	-0.01193	-0.00803	-0.00125	0.01277	0.01265	-0.00445	-0.00845	0.00719	0.00899	0.000361079	0.0041	0.01499	0.0179	0.00739	-0.00723	-0.01301	-0.01215	-0.01225	-0.00595	0.00429
0.16365	0.02169	0.04462	0.04028	0.01046	-0.0126	-0.01615	-0.01205	-0.01503	-0.02329	-0.02474	-0.02503	-0.03955	-0.04803	-0.02566	0.005	0.02297	0.02	0.00767	0.00307	0.00379	-0.00047893	5.54627e-05	0.01337	0.02999	0.03515	0.02041	-0.0012	-0.01545	-0.0175	-0.01169	-0.00795	-0.00152	0.01233	0.01232	-0.00451	-0.00826	0.00744	0.00908	0.000262508	0.0039	0.01474	0.01764	0.00721	-0.00736	-0.01313	-0.01207	-0.01189	-0.00552	0.00464
0.16383	0.02169	0.04465	0.04038	0.01067	-0.01221	-0.01559	-0.01141	-0.01447	-0.02296	-0.02473	-0.02511	-0.03946	-0.0478	-0.0255	0.00496	0.02271	0.01977	0.00764	0.0032	0.00396	-0.000470682	-7.64588e-05	0.01329	0.03009	0.03529	0.02041	-0.00136	-0.01555	-0.01737	-0.01145	-0.00785	-0.00178	0.01188	0.01198	-0.00457	-0.00807	0.00768	0.00917	0.000161599	0.0037	0.01449	0.01739	0.00703	-0.00749	-0.01325	-0.012	-0.01155	-0.00511	0.00498
0.16402	0.02169	0.04468	0.04048	0.01089	-0.01182	-0.01502	-0.01076	-0.01389	-0.02262	-0.02469	-0.02517	-0.03935	-0.04756	-0.02534	0.00492	0.02244	0.01954	0.0076	0.00333	0.00412	-0.000464885	-0.00021158	0.01321	0.03018	0.03542	0.0204	-0.00153	-0.01565	-0.01725	-0.0112	-0.00776	-0.00204	0.01143	0.01164	-0.00464	-0.00788	0.00791	0.00925	5.82409e-05	0.00349	0.01425	0.01714	0.00685	-0.00762	-0.01337	-0.01195	-0.01121	-0.0047	0.00532
0.1642	0.02169	0.04471	0.04058	0.0111	-0.01142	-0.01445	-0.0101	-0.01329	-0.02226	-0.02464	-0.02521	-0.03922	-0.04732	-0.02517	0.00489	0.02217	0.01931	0.00756	0.00346	0.00429	-0.000461577	-0.000349816	0.01311	0.03026	0.03554	0.02038	-0.0017	-0.01575	-0.01713	-0.01094	-0.00765	-0.0023	0.01097	0.01129	-0.00471	-0.0077	0.00814	0.00933	-4.76725e-05	0.00329	0.014	0.01689	0.00667	-0.00776	-0.0135	-0.0119	-0.01088	-0.0043	0.00565
0.16439	0.0217	0.04474	0.04068	0.01131	-0.01103	-0.01386	-0.00942	-0.01268	-0.02189	-0.02458	-0.02524	-0.03907	-0.04705	-0.02499	0.00485	0.0219	0.01907	0.00752	0.00359	0.00445	-0.000460796	-0.000491082	0.01302	0.03033	0.03564	0.02035	-0.00188	-0.01586	-0.01701	-0.01068	-0.00755	-0.00256	0.01051	0.01094	-0.00478	-0.00752	0.00836	0.00939	-0.000156249	0.00309	0.01376	0.01664	0.0065	-0.00789	-0.01363	-0.01186	-0.01056	-0.00391	0.00597
0.16457	0.0217	0.04477	0.04077	0.01152	-0.01063	-0.01327	-0.00873	-0.01206	-0.0215	-0.02449	-0.02524	-0.03891	-0.04678	-0.02481	0.00481	0.02163	0.01883	0.00748	0.00372	0.00461	-0.000462581	-0.000635293	0.01292	0.0304	0.03574	0.02031	-0.00206	-0.01597	-0.01688	-0.01042	-0.00743	-0.00281	0.01004	0.01058	-0.00485	-0.00734	0.00857	0.00945	-0.000267598	0.00289	0.01352	0.0164	0.00632	-0.00803	-0.01377	-0.01183	-0.01026	-0.00353	0.00629
0.16476	0.02171	0.04481	0.04086	0.01172	-0.01024	-0.01267	-0.00804	-0.01143	-0.02109	-0.02438	-0.02522	-0.03873	-0.0465	-0.02462	0.00477	0.02136	0.01858	0.00744	0.00385	0.00476	-0.00046697	-0.000782365	0.01281	0.03045	0.03582	0.02027	-0.00225	-0.01608	-0.01676	-0.01015	-0.00731	-0.00307	0.00957	0.01021	-0.00493	-0.00717	0.00877	0.0095	-0.000381826	0.00268	0.01328	0.01617	0.00615	-0.00816	-0.01392	-0.01181	-0.00997	-0.00317	0.00659
0.16494	0.02173	0.04485	0.04095	0.01192	-0.00984	-0.01207	-0.00733	-0.01078	-0.02067	-0.02426	-0.02518	-0.03853	-0.0462	-0.02443	0.00473	0.02108	0.01834	0.0074	0.00397	0.00492	-0.000473998	-0.000932206	0.0127	0.0305	0.0359	0.02021	-0.00245	-0.0162	-0.01664	-0.00988	-0.00719	-0.00332	0.0091	0.00985	-0.00501	-0.00701	0.00896	0.00955	-0.000499042	0.00248	0.01304	0.01594	0.00599	-0.0083	-0.01406	-0.0118	-0.00969	-0.00281	0.00689
0.16513	0.02174	0.04489	0.04104	0.01211	-0.00944	-0.01146	-0.00661	-0.01012	-0.02024	-0.02412	-0.02513	-0.03831	-0.04589	-0.02424	0.00469	0.0208	0.01809	0.00735	0.0041	0.00507	-0.000483688	-0.00108	0.01259	0.03054	0.03596	0.02015	-0.00265	-0.01632	-0.01652	-0.0096	-0.00706	-0.00358	0.00863	0.00948	-0.00509	-0.00685	0.00914	0.00958	-0.000619353	0.00228	0.01281	0.01571	0.00582	-0.00843	-0.01422	-0.0118	-0.00942	-0.00247	0.00718
0.16531	0.02176	0.04494	0.04112	0.0123	-0.00905	-0.01084	-0.00589	-0.00945	-0.01979	-0.02396	-0.02505	-0.03807	-0.04557	-0.02404	0.00465	0.02052	0.01784	0.0073	0.00422	0.00522	-0.000496062	-0.00124	0.01247	0.03057	0.03601	0.02007	-0.00286	-0.01644	-0.0164	-0.00932	-0.00692	-0.00382	0.00815	0.0091	-0.00518	-0.00669	0.00931	0.00961	-0.000742865	0.00207	0.01258	0.01549	0.00566	-0.00857	-0.01437	-0.01181	-0.00916	-0.00213	0.00746
0.1655	0.02177	0.04498	0.0412	0.01248	-0.00865	-0.01022	-0.00515	-0.00877	-0.01933	-0.02378	-0.02495	-0.03782	-0.04524	-0.02384	0.00461	0.02023	0.01759	0.00725	0.00434	0.00536	-0.00051114	-0.0014	0.01235	0.03059	0.03605	0.01999	-0.00307	-0.01657	-0.01628	-0.00904	-0.00678	-0.00407	0.00767	0.00872	-0.00527	-0.00654	0.00947	0.00962	-0.000869687	0.00187	0.01234	0.01527	0.00551	-0.0087	-0.01453	-0.01183	-0.00892	-0.00181	0.00774
0.16568	0.0218	0.04503	0.04128	0.01266	-0.00826	-0.0096	-0.00441	-0.00808	-0.01885	-0.02358	-0.02483	-0.03755	-0.04489	-0.02363	0.00457	0.01995	0.01733	0.0072	0.00446	0.00551	-0.000528942	-0.00156	0.01223	0.03061	0.03607	0.0199	-0.00328	-0.0167	-0.01616	-0.00875	-0.00663	-0.00431	0.00719	0.00834	-0.00536	-0.00639	0.00963	0.00963	-0.000999926	0.00167	0.01212	0.01506	0.00535	-0.00884	-0.0147	-0.01186	-0.00869	-0.0015	0.008
0.16587	0.02182	0.04508	0.04135	0.01282	-0.00787	-0.00898	-0.00367	-0.00738	-0.01837	-0.02337	-0.02469	-0.03726	-0.04453	-0.02342	0.00452	0.01966	0.01708	0.00715	0.00457	0.00564	-0.000549488	-0.00172	0.0121	0.03061	0.03609	0.0198	-0.0035	-0.01683	-0.01604	-0.00846	-0.00648	-0.00455	0.00671	0.00796	-0.00545	-0.00626	0.00977	0.00963	-0.00113	0.00146	0.01189	0.01485	0.0052	-0.00898	-0.01487	-0.0119	-0.00847	-0.0012	0.00825
0.16605	0.02184	0.04513	0.04142	0.01298	-0.00749	-0.00835	-0.00291	-0.00667	-0.01787	-0.02313	-0.02453	-0.03695	-0.04417	-0.0232	0.00448	0.01937	0.01682	0.00709	0.00469	0.00578	-0.000572799	-0.00188	0.01197	0.03061	0.0361	0.0197	-0.00372	-0.01697	-0.01592	-0.00816	-0.00632	-0.00479	0.00623	0.00757	-0.00554	-0.00612	0.0099	0.00962	-0.00127	0.00126	0.01167	0.01464	0.00505	-0.00911	-0.01504	-0.01195	-0.00827	-0.000912855	0.0085
0.16624	0.02187	0.04518	0.04148	0.01314	-0.00711	-0.00772	-0.00215	-0.00596	-0.01736	-0.02288	-0.02435	-0.03663	-0.04379	-0.02298	0.00443	0.01908	0.01656	0.00703	0.0048	0.00591	-0.000598897	-0.00205	0.01183	0.0306	0.03609	0.01958	-0.00395	-0.01711	-0.0158	-0.00787	-0.00616	-0.00502	0.00575	0.00719	-0.00564	-0.00599	0.01001	0.0096	-0.00141	0.00106	0.01145	0.01445	0.00491	-0.00925	-0.01522	-0.01201	-0.00808	-0.000638513	0.00874
0.16642	0.0219	0.04523	0.04154	0.01328	-0.00673	-0.00709	-0.00139	-0.00524	-0.01684	-0.02262	-0.02415	-0.03629	-0.0434	-0.02276	0.00439	0.01879	0.0163	0.00698	0.00491	0.00604	-0.0006278	-0.00222	0.01169	0.03059	0.03608	0.01946	-0.00419	-0.01725	-0.01568	-0.00756	-0.00599	-0.00525	0.00528	0.0068	-0.00574	-0.00587	0.01012	0.00956	-0.00156	0.000854654	0.01123	0.01425	0.00477	-0.00938	-0.0154	-0.01208	-0.0079	-0.000376781	0.00896
0.16661	0.02194	0.04529	0.04159	0.01342	-0.00636	-0.00645	-0.000618481	-0.00451	-0.01631	-0.02233	-0.02393	-0.03593	-0.043	-0.02253	0.00434	0.0185	0.01604	0.00692	0.00501	0.00617	-0.00065953	-0.00239	0.01155	0.03056	0.03605	0.01933	-0.00442	-0.0174	-0.01556	-0.00726	-0.00582	-0.00547	0.0048	0.00641	-0.00584	-0.00576	0.01021	0.00952	-0.00171	0.000651109	0.01101	0.01407	0.00463	-0.00952	-0.01558	-0.01216	-0.00774	-0.000127883	0.00918
0.16679	0.02197	0.04534	0.04163	0.01354	-0.00599	-0.00582	0.000153865	-0.00378	-0.01577	-0.02203	-0.02369	-0.03555	-0.04259	-0.0223	0.00429	0.01821	0.01578	0.00685	0.00512	0.00629	-0.000694107	-0.00256	0.0114	0.03053	0.03601	0.01919	-0.00466	-0.01754	-0.01545	-0.00696	-0.00565	-0.00569	0.00433	0.00602	-0.00594	-0.00565	0.01029	0.00947	-0.00186	0.000447476	0.0108	0.01388	0.0045	-0.00965	-0.01577	-0.01225	-0.00759	0.000107957	0.00939
0.16697	0.02201	0.0454	0.04167	0.01366	-0.00563	-0.00519	0.000929152	-0.00304	-0.01522	-0.02171	-0.02342	-0.03516	-0.04216	-0.02206	0.00424	0.01791	0.01552	0.00679	0.00522	0.0064	-0.000731552	-0.00273	0.01125	0.03049	0.03596	0.01905	-0.0049	-0.01769	-0.01533	-0.00665	-0.00547	-0.00591	0.00385	0.00564	-0.00604	-0.00554	0.01036	0.0094	-0.00202	0.000243739	0.01059	0.01371	0.00437	-0.00979	-0.01596	-0.01235	-0.00746	0.000330535	0.00959
0.16716	0.02205	0.04546	0.04171	0.01376	-0.00527	-0.00456	0.00171	-0.0023	-0.01466	-0.02138	-0.02314	-0.03475	-0.04173	-0.02182	0.00419	0.01762	0.01525	0.00673	0.00531	0.00651	-0.000771883	-0.0029	0.0111	0.03044	0.0359	0.0189	-0.00515	-0.01784	-0.01522	-0.00634	-0.00528	-0.00612	0.00338	0.00525	-0.00614	-0.00545	0.01042	0.00932	-0.00218	3.98438e-05	0.01038	0.01353	0.00424	-0.00992	-0.01616	-0.01246	-0.00734	0.000539732	0.00978
0.16734	0.02209	0.04552	0.04173	0.01386	-0.00493	-0.00393	0.00249	-0.00155	-0.01409	-0.02103	-0.02284	-0.03432	-0.04129	-0.02158	0.00414	0.01733	0.01499	0.00666	0.00541	0.00662	-0.00081512	-0.00308	0.01095	0.03038	0.03583	0.01874	-0.0054	-0.018	-0.0151	-0.00603	-0.00509	-0.00632	0.00292	0.00486	-0.00625	-0.00536	0.01046	0.00924	-0.00234	-0.000164275	0.01017	0.01337	0.00412	-0.01005	-0.01636	-0.01258	-0.00723	0.000735449	0.00995
0.16753	0.02213	0.04557	0.04175	0.01395	-0.00458	-0.0033	0.00327	-0.000805368	-0.01352	-0.02066	-0.02251	-0.03387	-0.04083	-0.02134	0.00409	0.01704	0.01473	0.00659	0.0055	0.00672	-0.000861283	-0.00326	0.01079	0.03031	0.03575	0.01857	-0.00565	-0.01815	-0.01499	-0.00572	-0.0049	-0.00652	0.00246	0.00448	-0.00635	-0.00527	0.01049	0.00914	-0.00251	-0.000368682	0.00997	0.0132	0.004	-0.01018	-0.01656	-0.0127	-0.00714	0.000917589	0.01012
0.16771	0.02218	0.04564	0.04177	0.01402	-0.00425	-0.00267	0.00405	-5.68256e-05	-0.01294	-0.02027	-0.02217	-0.03341	-0.04037	-0.02109	0.00403	0.01674	0.01447	0.00653	0.00559	0.00682	-0.000910389	-0.00343	0.01063	0.03024	0.03566	0.0184	-0.00591	-0.01831	-0.01488	-0.0054	-0.00471	-0.00672	0.002	0.0041	-0.00646	-0.00519	0.0105	0.00902	-0.00269	-0.000573442	0.00976	0.01305	0.00388	-0.01031	-0.01676	-0.01284	-0.00706	0.00109	0.01028
0.1679	0.02223	0.0457	0.04178	0.01408	-0.00393	-0.00205	0.00483	0.000692583	-0.01235	-0.01987	-0.02181	-0.03293	-0.03989	-0.02084	0.00398	0.01645	0.01421	0.00646	0.00567	0.00691	-0.000962459	-0.00361	0.01046	0.03016	0.03556	0.01822	-0.00617	-0.01847	-0.01477	-0.00509	-0.00451	-0.0069	0.00155	0.00372	-0.00656	-0.00512	0.01051	0.0089	-0.00287	-0.00077862	0.00956	0.01289	0.00377	-0.01044	-0.01697	-0.01299	-0.007	0.00124	0.01043
0.16808	0.02228	0.04576	0.04178	0.01414	-0.00361	-0.00143	0.00561	0.00144	-0.01175	-0.01946	-0.02142	-0.03244	-0.03941	-0.02058	0.00393	0.01616	0.01394	0.00639	0.00575	0.007	-0.00102	-0.00379	0.0103	0.03007	0.03545	0.01804	-0.00643	-0.01864	-0.01466	-0.00477	-0.00431	-0.00709	0.0011	0.00334	-0.00667	-0.00506	0.0105	0.00877	-0.00305	-0.000984282	0.00937	0.01275	0.00366	-0.01057	-0.01718	-0.01314	-0.00695	0.00138	0.01056
0.16827	0.02233	0.04582	0.04177	0.01418	-0.0033	-0.000816568	0.00638	0.00219	-0.01116	-0.01903	-0.02102	-0.03193	-0.03892	-0.02033	0.00387	0.01587	0.01368	0.00631	0.00583	0.00708	-0.00108	-0.00397	0.01013	0.02997	0.03533	0.01785	-0.00669	-0.0188	-0.01456	-0.00446	-0.0041	-0.00726	0.000663936	0.00297	-0.00677	-0.005	0.01047	0.00862	-0.00324	-0.00119	0.00917	0.0126	0.00356	-0.0107	-0.01739	-0.01331	-0.00692	0.00151	0.01069
0.16845	0.02238	0.04588	0.04176	0.01421	-0.003	-0.000205775	0.00716	0.00294	-0.01055	-0.01859	-0.0206	-0.03141	-0.03842	-0.02007	0.00381	0.01558	0.01342	0.00624	0.0059	0.00716	-0.00114	-0.00415	0.00996	0.02987	0.0352	0.01765	-0.00696	-0.01897	-0.01445	-0.00414	-0.0039	-0.00743	0.000230382	0.0026	-0.00687	-0.00494	0.01043	0.00846	-0.00343	-0.0014	0.00898	0.01247	0.00346	-0.01082	-0.0176	-0.01348	-0.0069	0.00162	0.01081
0.16864	0.02244	0.04594	0.04174	0.01422	-0.00271	0.000399967	0.00793	0.00368	-0.00995	-0.01813	-0.02016	-0.03087	-0.03791	-0.01981	0.00376	0.01529	0.01317	0.00617	0.00597	0.00723	-0.0012	-0.00433	0.00978	0.02976	0.03505	0.01744	-0.00722	-0.01914	-0.01435	-0.00383	-0.00369	-0.0076	-0.000196168	0.00223	-0.00697	-0.0049	0.01038	0.00829	-0.00363	-0.0016	0.00879	0.01233	0.00336	-0.01095	-0.01782	-0.01367	-0.00689	0.00172	0.01091
[truncated: 4,501 more rows]
[truncated: 301 more columns]

## Sheet: Supp Fig. 9 GoF Heatmap
Velocity Heatmap for segmented GoF keratinocytes as seen in Supp Fig. 9
	Time (sec)
Norm. Pos	0	5	10	15	20	25	30	35	40	45	50	55	60	65	70	75	80	85	90	95	100	105	110	115	120	125	130	135	140	145	150	155	160	165	170	175	180	185	190	195	200	205	210	215	220	225	230	235	240
[truncated: 5,178 more rows]
[truncated: 301 more columns]
