# Supplementary material for: Spatiotemporal dynamics of PIEZO1 localization controls keratinocyte migration during wound healing
Source: eLife. 2021 Sep 27;10:e65415. doi: 10.7554/eLife.65415 (PMC8577841; doi:10.7554/eLife.65415)
Supplement: Figure 5—source data 1. — (Sheet 1) X,Y coordinates to create representative overlays of cell boundary outlines in Figure 5C detected and segmented from differential interference contrast (DIC) time-lapse series of DMSO-treated ControlcKO, 4 µM Yoda1-treated ControlcKO, DMSO-treated Piezo1-cKO, ControlGoF, and Piezo1-GoF keratinocytes. This dataset is available on Dryad. [file elife-65415-fig5-data1.xlsx]

## Sheet: Fig 5E Con(cKO)+DMSO Heatmap
Velocity Heatmap for segmented Control(cKO)+DMSO keratinocytes as seen in Fig. 5E
	Time(sec)
Norm. Pos	0	5	10	15	20	25	30	35	40	45	50	55	60	65	70	75	80	85	90	95	100	105	110	115	120	125	130	135	140	145	150	155	160	165	170	175	180	185	190	195	200	205	210	215	220	225	230	235	240
0.000242483	0.05883	0.02835	-0.13231	-0.09176	0.2662	0.54517	0.55739	0.42278	0.11799	-0.09465	0.106	0.34987	0.34984	0.37913	0.50273	0.54318	0.50338	0.5096	0.54297	0.60743	0.61487	0.53005	0.51817	0.53204	0.60193	0.68208	0.78235	0.74647	0.60485	0.4089	0.04849	-0.22401	-0.10923	0.08985	0.16598	0.27179	0.50355	0.75394	0.86541	0.73856	0.40731	0.23283	0.32624	0.44788	0.40606	0.35286	0.29574	0.09319	-0.01978
0.000484966	0.05891	0.02906	-0.12852	-0.08292	0.27429	0.54362	0.54784	0.41687	0.12476	-0.08302	0.10662	0.33759	0.33561	0.3648	0.48746	0.53328	0.49703	0.49514	0.52136	0.58593	0.59869	0.51948	0.50789	0.52238	0.59388	0.6777	0.77734	0.74073	0.60115	0.41002	0.05866	-0.2089	-0.09746	0.09956	0.17433	0.27517	0.50022	0.74419	0.84832	0.72067	0.4007	0.23286	0.319	0.43032	0.38868	0.33682	0.27676	0.0789	-0.02684
0.000727449	0.05891	0.02972	-0.12465	-0.074	0.2823	0.5419	0.53802	0.41077	0.13165	-0.07127	0.10709	0.32509	0.32135	0.35049	0.4721	0.52324	0.4904	0.48023	0.49935	0.56409	0.58222	0.50876	0.49744	0.5124	0.58538	0.67286	0.77213	0.73507	0.59761	0.41136	0.06924	-0.19341	-0.08549	0.10942	0.18278	0.27841	0.49654	0.73393	0.83065	0.7023	0.3939	0.233	0.31198	0.41284	0.37135	0.32095	0.25784	0.06454	-0.03387
0.000969932	0.05883	0.03029	-0.12073	-0.06506	0.29017	0.54001	0.52796	0.4045	0.1386	-0.05946	0.10738	0.31241	0.30713	0.33628	0.45671	0.5131	0.48353	0.46494	0.477	0.54197	0.5655	0.49789	0.48687	0.50215	0.57642	0.66753	0.76672	0.72952	0.59423	0.41294	0.0802	-0.17757	-0.07337	0.1194	0.19133	0.2815	0.49251	0.72319	0.81242	0.68351	0.38692	0.23324	0.30524	0.39553	0.35417	0.30534	0.23907	0.05017	-0.04084
0.00121	0.05866	0.03077	-0.11678	-0.05616	0.29784	0.53794	0.5177	0.39807	0.14558	-0.04763	0.10749	0.29959	0.293	0.32222	0.44135	0.50292	0.47642	0.4493	0.45439	0.51965	0.54858	0.48693	0.4762	0.49166	0.56703	0.66171	0.76109	0.72409	0.59106	0.41478	0.09154	-0.16142	-0.06112	0.12946	0.19993	0.28441	0.48813	0.71195	0.79369	0.66435	0.37979	0.23361	0.29881	0.37848	0.33721	0.29007	0.22056	0.03586	-0.04773
0.00145	0.05838	0.03113	-0.11284	-0.04734	0.30526	0.53569	0.50729	0.3915	0.15254	-0.03585	0.10741	0.28669	0.27905	0.30838	0.4261	0.49272	0.46913	0.43339	0.4316	0.49719	0.53151	0.47588	0.46549	0.48097	0.55724	0.6554	0.75524	0.71879	0.5881	0.41686	0.10323	-0.14501	-0.04879	0.13958	0.20856	0.28713	0.48337	0.70025	0.77452	0.6449	0.37253	0.23411	0.29276	0.36178	0.32056	0.27522	0.20241	0.02167	-0.0545
0.0017	0.058	0.03134	-0.10894	-0.03866	0.31238	0.53326	0.49675	0.3848	0.15945	-0.02417	0.10712	0.27374	0.26533	0.29485	0.41102	0.48256	0.46167	0.41727	0.40869	0.47466	0.51433	0.46478	0.45476	0.47011	0.54708	0.64859	0.74916	0.71363	0.58537	0.41922	0.11525	-0.12838	-0.03643	0.14972	0.2172	0.28964	0.47825	0.6881	0.75496	0.62521	0.36517	0.23475	0.28714	0.34552	0.30429	0.26089	0.1847	0.00766	-0.06114
0.00194	0.05749	0.0314	-0.10511	-0.03019	0.31913	0.53065	0.48615	0.378	0.16625	-0.01266	0.10662	0.26081	0.2519	0.28168	0.39618	0.47247	0.45409	0.401	0.38575	0.45212	0.49708	0.45366	0.44405	0.45914	0.53658	0.64128	0.74285	0.70862	0.58289	0.42184	0.12757	-0.11158	-0.02407	0.15985	0.22582	0.29193	0.47276	0.67552	0.73507	0.60537	0.35774	0.23554	0.28199	0.32976	0.28849	0.24715	0.16754	-0.00609	-0.06763
0.00218	0.05685	0.03127	-0.10138	-0.02197	0.32547	0.52785	0.47551	0.37111	0.1729	-0.00137	0.10591	0.24794	0.23884	0.26894	0.38163	0.46249	0.44643	0.38464	0.36285	0.42965	0.47982	0.44254	0.4334	0.44809	0.5258	0.63351	0.73629	0.70376	0.58066	0.42473	0.14017	-0.09466	-0.01175	0.16994	0.2344	0.29399	0.46691	0.66254	0.71493	0.58544	0.35027	0.23651	0.27735	0.3146	0.27323	0.23409	0.15101	-0.01952	-0.07394
0.00242	0.05606	0.03094	-0.0978	-0.01406	0.33136	0.52486	0.46489	0.36415	0.17934	0.00964	0.10498	0.23517	0.22618	0.25668	0.36743	0.45267	0.43871	0.36826	0.34005	0.40729	0.46258	0.43144	0.42284	0.43702	0.51477	0.62526	0.72948	0.69903	0.5787	0.42788	0.153	-0.07766	0.000490889	0.17997	0.24293	0.29582	0.46071	0.6492	0.69461	0.5655	0.3428	0.23766	0.27326	0.30009	0.25858	0.22176	0.1352	-0.03257	-0.08005
0.00267	0.05511	0.03037	-0.09441	-0.00652	0.33673	0.5217	0.45433	0.35713	0.18555	0.02032	0.10382	0.22254	0.21399	0.24495	0.35365	0.44303	0.43097	0.35193	0.31743	0.38512	0.44541	0.4204	0.4124	0.42598	0.50355	0.61657	0.72241	0.69444	0.577	0.43129	0.16604	-0.06064	0.01263	0.18991	0.25138	0.29743	0.45417	0.63552	0.67418	0.54564	0.33536	0.239	0.26978	0.28633	0.24461	0.21024	0.1202	-0.04518	-0.08595
0.00291	0.054	0.02955	-0.09123	0.000609908	0.34157	0.51835	0.44388	0.35009	0.19146	0.03061	0.10245	0.2101	0.2023	0.23381	0.34033	0.43362	0.42325	0.33569	0.29504	0.36318	0.42835	0.40942	0.40212	0.41502	0.49219	0.60746	0.71505	0.68996	0.57556	0.43492	0.17923	-0.04364	0.02464	0.19975	0.25974	0.29881	0.44731	0.62156	0.65372	0.52593	0.328	0.24055	0.26691	0.27335	0.23138	0.19958	0.10607	-0.05729	-0.09163
0.00315	0.05272	0.02846	-0.08831	0.00727	0.34582	0.51484	0.43358	0.34302	0.19703	0.04048	0.10086	0.19788	0.19115	0.2233	0.32752	0.42444	0.41557	0.31961	0.27295	0.34152	0.41144	0.39854	0.39204	0.40418	0.48074	0.59795	0.70741	0.68558	0.57437	0.43878	0.19254	-0.0267	0.0365	0.20948	0.26802	0.29997	0.44016	0.60736	0.63332	0.50646	0.32075	0.24233	0.2647	0.26123	0.21893	0.18984	0.09288	-0.06884	-0.09706
0.00339	0.05125	0.02707	-0.08569	0.01341	0.34945	0.51115	0.42348	0.33596	0.20223	0.04989	0.09907	0.18593	0.18058	0.21345	0.31525	0.41553	0.40796	0.30374	0.2512	0.32019	0.3947	0.38776	0.38217	0.39351	0.46926	0.58808	0.69947	0.68126	0.57342	0.44283	0.20591	-0.00988	0.04819	0.21908	0.2762	0.30095	0.43276	0.59298	0.61305	0.48731	0.31366	0.24434	0.26316	0.25	0.20733	0.18106	0.08069	-0.07978	-0.10223
0.00364	0.0496	0.02536	-0.0834	0.019	0.35244	0.50731	0.41362	0.32891	0.20702	0.05879	0.09707	0.17427	0.17061	0.2043	0.30357	0.40691	0.40044	0.28812	0.22986	0.29923	0.37818	0.37711	0.37254	0.38306	0.45781	0.57786	0.6912	0.67697	0.57268	0.44704	0.2193	0.00678	0.0597	0.22855	0.28429	0.30175	0.42513	0.57847	0.59301	0.46855	0.30678	0.2466	0.26231	0.23971	0.19662	0.17326	0.06954	-0.09007	-0.10714
0.00388	0.04775	0.02331	-0.08149	0.02399	0.35477	0.50331	0.40403	0.3219	0.21135	0.06715	0.0949	0.16293	0.16126	0.19587	0.2925	0.39858	0.39302	0.2728	0.20895	0.27869	0.36191	0.36661	0.36318	0.37287	0.44643	0.56735	0.68261	0.67268	0.57213	0.45139	0.23265	0.02326	0.07102	0.23791	0.29228	0.3024	0.41733	0.56391	0.57327	0.45028	0.30013	0.24912	0.26217	0.2304	0.18684	0.16648	0.05948	-0.09965	-0.11178
0.00412	0.04569	0.02092	-0.07997	0.02834	0.35643	0.49916	0.39475	0.31493	0.21519	0.07496	0.09255	0.15193	0.15256	0.18818	0.28207	0.39056	0.38573	0.25782	0.18852	0.25859	0.34592	0.35626	0.35411	0.36298	0.43519	0.55656	0.67366	0.66835	0.57175	0.45585	0.24591	0.0395	0.08215	0.24713	0.30019	0.30293	0.40941	0.54935	0.55392	0.43256	0.29377	0.25191	0.26274	0.2221	0.17802	0.16074	0.05054	-0.1085	-0.11614
0.00436	0.04344	0.01816	-0.07889	0.03204	0.35739	0.49487	0.3858	0.30801	0.21852	0.0822	0.09005	0.1413	0.1445	0.18125	0.27231	0.38286	0.37857	0.2432	0.1686	0.23898	0.33023	0.34608	0.34534	0.35342	0.42413	0.54554	0.66436	0.66393	0.57151	0.46037	0.25902	0.05548	0.09309	0.25625	0.30803	0.30338	0.40142	0.53487	0.53505	0.41547	0.28774	0.25498	0.26401	0.21483	0.17018	0.15604	0.04272	-0.11658	-0.12021
0.00461	0.04098	0.01502	-0.07828	0.03505	0.35766	0.49045	0.37722	0.30116	0.22132	0.08884	0.08741	0.13105	0.13709	0.17508	0.26322	0.37546	0.37155	0.22897	0.14922	0.21988	0.31489	0.33609	0.33688	0.34422	0.4133	0.53433	0.65467	0.65939	0.57137	0.46492	0.27194	0.07117	0.10384	0.26526	0.31581	0.30379	0.39342	0.52054	0.51674	0.39907	0.28207	0.25833	0.266	0.2086	0.16336	0.15238	0.03604	-0.12386	-0.12399
0.00485	0.03831	0.01149	-0.07814	0.03736	0.35724	0.4859	0.36901	0.29438	0.22354	0.09488	0.08465	0.12118	0.13032	0.16969	0.25483	0.36838	0.36466	0.21516	0.13041	0.20132	0.29991	0.32629	0.32875	0.33542	0.40275	0.52296	0.6446	0.65466	0.57131	0.46947	0.28461	0.08653	0.11441	0.27418	0.32354	0.30418	0.38547	0.50644	0.49906	0.38342	0.27681	0.26198	0.26869	0.20343	0.15757	0.14976	0.03049	-0.13033	-0.12747
0.00509	0.03544	0.00757	-0.07851	0.03897	0.35614	0.48123	0.3612	0.28768	0.22519	0.10033	0.08178	0.1117	0.12418	0.16507	0.24713	0.3616	0.3579	0.20176	0.11218	0.18333	0.28533	0.3167	0.32095	0.32703	0.39252	0.51146	0.63412	0.64971	0.57129	0.47397	0.29699	0.10155	0.12482	0.28302	0.33123	0.30462	0.37763	0.49265	0.48209	0.36859	0.27198	0.26593	0.27206	0.19932	0.15283	0.14815	0.02607	-0.13596	-0.13066
0.00533	0.03237	0.00327	-0.0794	0.03987	0.35437	0.47643	0.3538	0.28106	0.22625	0.10517	0.07883	0.1026	0.11865	0.16121	0.24013	0.35512	0.35128	0.18881	0.09455	0.16591	0.27116	0.30733	0.31349	0.31908	0.38265	0.49987	0.62322	0.64449	0.57126	0.4784	0.30902	0.1162	0.13508	0.29181	0.33892	0.30513	0.36999	0.47925	0.4659	0.35463	0.26762	0.27017	0.27609	0.19627	0.14912	0.14752	0.02273	-0.14076	-0.13356
0.00558	0.02911	-0.00143	-0.08081	0.04006	0.35195	0.47152	0.3468	0.27452	0.22671	0.10943	0.07579	0.09387	0.1137	0.15809	0.23383	0.34892	0.34478	0.1763	0.07753	0.14911	0.25742	0.29819	0.30638	0.31158	0.37317	0.48824	0.61188	0.63894	0.5712	0.48272	0.32065	0.13047	0.14521	0.30056	0.34661	0.30577	0.36259	0.46631	0.45056	0.34158	0.26375	0.27471	0.28077	0.19427	0.14647	0.14785	0.02045	-0.14472	-0.13615
0.00582	0.02567	-0.00651	-0.08274	0.03957	0.3489	0.4665	0.34022	0.26807	0.22658	0.11311	0.0727	0.08549	0.10929	0.15569	0.22821	0.343	0.3384	0.16423	0.06113	0.13292	0.24415	0.28929	0.2996	0.30454	0.3641	0.47657	0.60011	0.63301	0.57107	0.48689	0.33185	0.14434	0.15523	0.30929	0.35433	0.30658	0.35553	0.45392	0.43613	0.32949	0.2604	0.27953	0.28606	0.19331	0.14486	0.14908	0.01919	-0.14785	-0.13845
0.00606	0.02205	-0.01195	-0.08518	0.03841	0.34526	0.46137	0.33404	0.26171	0.22586	0.11625	0.06957	0.07743	0.10537	0.15399	0.22327	0.33733	0.33212	0.15261	0.04536	0.11737	0.23137	0.28063	0.29317	0.29797	0.35547	0.46491	0.58789	0.62666	0.57084	0.49089	0.34258	0.15781	0.16515	0.31803	0.3621	0.30761	0.34887	0.44215	0.42267	0.31838	0.25759	0.28464	0.29194	0.19337	0.14428	0.15118	0.01889	-0.15015	-0.14046
0.0063	0.01827	-0.01774	-0.08812	0.03662	0.34105	0.45614	0.32826	0.25544	0.22457	0.11886	0.06641	0.06968	0.10192	0.15295	0.21899	0.33191	0.32593	0.14143	0.03023	0.10246	0.21908	0.27224	0.28708	0.29186	0.34728	0.45328	0.5752	0.61985	0.57045	0.49468	0.35281	0.17087	0.175	0.3268	0.36995	0.3089	0.34267	0.43108	0.41023	0.30828	0.25532	0.29001	0.29835	0.19443	0.14473	0.1541	0.0195	-0.15164	-0.14218
0.00655	0.01434	-0.02385	-0.09155	0.03423	0.33632	0.45081	0.32287	0.24926	0.22273	0.12099	0.06323	0.06218	0.09886	0.15253	0.21533	0.32672	0.31984	0.13069	0.01574	0.08822	0.20731	0.26411	0.28131	0.28621	0.33955	0.44169	0.56204	0.61252	0.56989	0.49823	0.3625	0.18351	0.18481	0.33561	0.37788	0.31049	0.33701	0.42079	0.39885	0.29921	0.25361	0.29563	0.30527	0.19646	0.14618	0.15777	0.02095	-0.15235	-0.14361
0.00679	0.01029	-0.03026	-0.09542	0.0313	0.33112	0.44539	0.31787	0.2432	0.22038	0.12268	0.06004	0.05492	0.09614	0.15268	0.21229	0.32174	0.31381	0.12039	0.00189	0.07466	0.19607	0.25626	0.27587	0.28102	0.33227	0.43016	0.54841	0.60464	0.56912	0.50154	0.37164	0.19574	0.19458	0.34449	0.38592	0.31242	0.33194	0.41133	0.38857	0.29118	0.25245	0.30149	0.31264	0.19943	0.14862	0.16213	0.02317	-0.15231	-0.14476
0.00703	0.00613	-0.03694	-0.0997	0.02786	0.32548	0.43989	0.31324	0.23724	0.21755	0.12396	0.05687	0.04784	0.09371	0.15336	0.20982	0.31695	0.30786	0.11052	-0.0113	0.06177	0.18538	0.2487	0.27075	0.27626	0.32544	0.41871	0.5343	0.59616	0.5681	0.50456	0.3802	0.20756	0.20436	0.35346	0.39409	0.31473	0.32753	0.40277	0.37941	0.28419	0.25186	0.30754	0.32041	0.20331	0.15201	0.16712	0.02609	-0.15153	-0.14563
0.00727	0.00189	-0.04384	-0.10436	0.02399	0.31945	0.43431	0.30897	0.23141	0.21429	0.12488	0.05371	0.04092	0.09149	0.15451	0.20791	0.31235	0.30197	0.10108	-0.02385	0.04958	0.17526	0.24143	0.26593	0.27192	0.31905	0.40733	0.5197	0.58706	0.56681	0.5073	0.38817	0.21897	0.21414	0.36252	0.4024	0.31745	0.32383	0.39516	0.37138	0.27822	0.2518	0.31377	0.32854	0.20804	0.15634	0.17268	0.02963	-0.15006	-0.14622
0.00752	-0.00242	-0.05093	-0.10935	0.01974	0.31309	0.42865	0.30505	0.22571	0.21064	0.12549	0.05058	0.03411	0.08944	0.15608	0.20651	0.30793	0.29614	0.09206	-0.03573	0.0381	0.16573	0.23447	0.26141	0.26798	0.31307	0.39603	0.50461	0.57731	0.56521	0.50974	0.39555	0.22999	0.22395	0.3717	0.41085	0.32059	0.32087	0.38853	0.36449	0.27328	0.25227	0.32014	0.33696	0.2136	0.16156	0.17873	0.03371	-0.14795	-0.14656
0.00776	-0.00677	-0.05817	-0.11461	0.01517	0.30645	0.42293	0.30145	0.22016	0.20665	0.12585	0.04749	0.02737	0.08747	0.15801	0.20559	0.30366	0.29036	0.08346	-0.04695	0.02732	0.15679	0.22784	0.25717	0.26442	0.30749	0.38482	0.48904	0.56687	0.56329	0.51187	0.40233	0.24061	0.2338	0.381	0.41947	0.32418	0.31869	0.38292	0.35874	0.26933	0.25325	0.32662	0.34562	0.21994	0.16765	0.18521	0.03825	-0.14523	-0.14664
0.008	-0.01114	-0.0655	-0.12009	0.01037	0.29957	0.41715	0.29816	0.21477	0.20239	0.12599	0.04443	0.02065	0.08554	0.16024	0.20512	0.29955	0.28465	0.07528	-0.0575	0.01727	0.14846	0.22154	0.25321	0.26122	0.30228	0.3737	0.47299	0.55573	0.56103	0.51369	0.40852	0.25084	0.24369	0.39043	0.42824	0.32823	0.31733	0.37836	0.35412	0.26634	0.2547	0.33315	0.35446	0.227	0.17455	0.19203	0.04315	-0.14196	-0.14647
0.00824	-0.01549	-0.07288	-0.12573	0.00539	0.29252	0.41132	0.29517	0.20956	0.19791	0.12597	0.04142	0.01393	0.08356	0.1627	0.20505	0.29559	0.279	0.06753	-0.06738	0.00794	0.14076	0.21558	0.24951	0.25835	0.29743	0.36266	0.45647	0.54389	0.5584	0.51519	0.41413	0.26069	0.25363	0.39998	0.43718	0.33274	0.31679	0.37484	0.3506	0.26429	0.25659	0.33969	0.3634	0.23473	0.18223	0.19913	0.04834	-0.1382	-0.14607
0.00849	-0.0198	-0.08026	-0.13148	0.000310026	0.28534	0.40544	0.29244	0.20453	0.19327	0.12583	0.03847	0.00717	0.08148	0.16532	0.20534	0.29177	0.27342	0.0602	-0.07657	-0.000648854	0.1337	0.20999	0.24607	0.25579	0.29291	0.3517	0.43949	0.53132	0.55541	0.51639	0.41916	0.27017	0.2636	0.40966	0.44626	0.33772	0.31709	0.37239	0.34816	0.26312	0.25889	0.3462	0.37238	0.24307	0.19063	0.20643	0.05373	-0.134	-0.14545
0.00873	-0.02404	-0.08759	-0.13726	-0.00479	0.27809	0.39952	0.28996	0.19969	0.18853	0.12563	0.03557	0.000331071	0.07924	0.16803	0.20595	0.28809	0.26793	0.05329	-0.08507	-0.00849	0.1273	0.20477	0.24288	0.25351	0.28868	0.34081	0.42206	0.51805	0.55203	0.51729	0.42364	0.27928	0.27361	0.41945	0.4555	0.34315	0.31822	0.37098	0.34675	0.26279	0.26155	0.35261	0.38134	0.25196	0.1997	0.21385	0.05922	-0.12941	-0.14461
0.00897	-0.02819	-0.09481	-0.14302	-0.00984	0.27081	0.39356	0.28771	0.19506	0.18374	0.12541	0.03273	-0.00661	0.07677	0.17076	0.20682	0.28455	0.26253	0.04683	-0.09286	-0.01558	0.12156	0.19993	0.23992	0.2515	0.28472	0.33	0.40422	0.50407	0.54827	0.51791	0.42758	0.28802	0.28364	0.42935	0.46487	0.34903	0.32017	0.37061	0.34635	0.26325	0.26451	0.35887	0.39018	0.26132	0.20936	0.22133	0.06474	-0.12451	-0.14358
0.00921	-0.03222	-0.10189	-0.14869	-0.01477	0.26356	0.38759	0.28565	0.19064	0.17898	0.1252	0.02996	-0.01367	0.07403	0.17343	0.20793	0.28115	0.25724	0.0408	-0.09995	-0.02192	0.11649	0.1955	0.23719	0.24972	0.281	0.31925	0.38598	0.48942	0.54414	0.51825	0.431	0.29638	0.29366	0.43933	0.47436	0.35534	0.32293	0.37123	0.34689	0.26444	0.26771	0.3649	0.39885	0.27108	0.21957	0.22879	0.07021	-0.11934	-0.14235
0.00946	-0.03611	-0.10876	-0.1542	-0.0195	0.25639	0.38158	0.28377	0.18644	0.17428	0.12505	0.02726	-0.02087	0.07095	0.17596	0.2092	0.27788	0.25209	0.03523	-0.10631	-0.02749	0.1121	0.19147	0.23468	0.24816	0.27749	0.30857	0.36738	0.47411	0.53964	0.51834	0.43394	0.30438	0.30364	0.44937	0.48395	0.36206	0.32646	0.37282	0.34832	0.26629	0.2711	0.37066	0.40727	0.28118	0.23024	0.23615	0.07556	-0.11396	-0.14095
0.0097	-0.03983	-0.11539	-0.15951	-0.02397	0.24933	0.37557	0.28204	0.18246	0.1697	0.12498	0.02463	-0.02822	0.06749	0.17828	0.21059	0.27476	0.24708	0.03012	-0.11196	-0.03229	0.1084	0.18786	0.23238	0.24679	0.27417	0.29795	0.34846	0.45818	0.53478	0.51819	0.43641	0.31199	0.31356	0.45944	0.49364	0.36916	0.33073	0.37532	0.35058	0.26873	0.27461	0.37606	0.41536	0.29152	0.2413	0.24337	0.08071	-0.10842	-0.13937
0.00994	-0.04335	-0.12173	-0.16455	-0.02811	0.24243	0.36953	0.28042	0.1787	0.16529	0.12504	0.02208	-0.03573	0.0636	0.1803	0.21205	0.27179	0.24224	0.02547	-0.11686	-0.03633	0.10539	0.18468	0.23029	0.24559	0.27101	0.28739	0.32925	0.44168	0.52957	0.51783	0.43845	0.31922	0.32337	0.46953	0.50339	0.37662	0.33568	0.37867	0.3536	0.27171	0.27817	0.38105	0.42304	0.30204	0.25269	0.25036	0.08562	-0.10279	-0.13764
0.01018	-0.04666	-0.12773	-0.16926	-0.03187	0.23572	0.36349	0.27889	0.17517	0.16108	0.12523	0.01961	-0.04339	0.05925	0.18194	0.21353	0.26896	0.23759	0.0213	-0.12103	-0.03959	0.10307	0.18193	0.22838	0.24454	0.268	0.2769	0.30981	0.42465	0.52405	0.51728	0.44007	0.32606	0.33303	0.47958	0.51318	0.38439	0.34127	0.38281	0.35731	0.27513	0.2817	0.38555	0.43025	0.31264	0.26432	0.25709	0.09022	-0.09709	-0.13575
0.01043	-0.04974	-0.13337	-0.1736	-0.03518	0.22925	0.35745	0.27743	0.17186	0.15713	0.12559	0.01723	-0.05121	0.0544	0.18314	0.21497	0.26629	0.23314	0.0176	-0.12447	-0.04208	0.10146	0.17962	0.22666	0.24363	0.26511	0.26648	0.29018	0.40716	0.51822	0.51655	0.44132	0.33249	0.3425	0.48957	0.52299	0.39244	0.34743	0.38766	0.36163	0.27894	0.28514	0.3895	0.43691	0.32326	0.27612	0.2635	0.09448	-0.09138	-0.13371
0.01067	-0.05257	-0.1386	-0.17753	-0.03801	0.22303	0.35141	0.27601	0.16877	0.15345	0.12612	0.01495	-0.05916	0.04902	0.18382	0.21632	0.26378	0.22891	0.01437	-0.12716	-0.0438	0.10055	0.17777	0.22512	0.24283	0.26233	0.25614	0.27043	0.38926	0.51212	0.51566	0.44221	0.3385	0.35173	0.49946	0.53279	0.40074	0.35409	0.39314	0.36649	0.28306	0.28841	0.39283	0.44295	0.3338	0.288	0.26954	0.09835	-0.08568	-0.13152
0.01091	-0.05514	-0.1434	-0.18099	-0.0403	0.21711	0.34537	0.27459	0.16588	0.15007	0.12684	0.01277	-0.06723	0.04308	0.18389	0.21753	0.26143	0.22492	0.01163	-0.12912	-0.04476	0.10033	0.17636	0.22374	0.24215	0.25966	0.24591	0.25063	0.37102	0.50576	0.51464	0.44278	0.34408	0.36067	0.50921	0.54255	0.40924	0.36118	0.39916	0.37181	0.28741	0.29144	0.39549	0.44832	0.34418	0.29988	0.27519	0.10182	-0.08005	-0.12919
0.01115	-0.05744	-0.14775	-0.18397	-0.04203	0.2115	0.33934	0.27316	0.16319	0.14701	0.12774	0.0107	-0.0754	0.03658	0.1833	0.21855	0.25925	0.22118	0.00936	-0.13034	-0.04497	0.1008	0.17541	0.22252	0.24155	0.25708	0.2358	0.23083	0.35252	0.49917	0.5135	0.44305	0.34922	0.36928	0.51877	0.55225	0.4179	0.36863	0.40565	0.37752	0.29192	0.29416	0.39742	0.45295	0.35432	0.31169	0.28039	0.10486	-0.0745	-0.12673
0.0114	-0.05946	-0.15162	-0.18642	-0.04317	0.20623	0.33333	0.27169	0.16069	0.14429	0.12884	0.00875	-0.08363	0.02948	0.18197	0.21932	0.25724	0.21771	0.00755	-0.13085	-0.04443	0.10196	0.17491	0.22145	0.24103	0.25459	0.22584	0.21111	0.33384	0.49237	0.51224	0.44303	0.3539	0.3775	0.52811	0.56185	0.42669	0.37636	0.4125	0.38354	0.29652	0.2965	0.39856	0.45678	0.36413	0.32333	0.28512	0.10745	-0.06906	-0.12413
0.01164	-0.06119	-0.155	-0.18834	-0.04369	0.2013	0.32734	0.27015	0.15834	0.14189	0.13012	0.00693	-0.0919	0.02179	0.17984	0.2198	0.25539	0.2145	0.00622	-0.13066	-0.04316	0.10379	0.17486	0.22052	0.24058	0.2522	0.21604	0.19155	0.31506	0.48541	0.51089	0.44275	0.35811	0.38529	0.53717	0.57132	0.43555	0.38429	0.41962	0.38979	0.30114	0.2984	0.39887	0.45977	0.37354	0.33474	0.28936	0.10959	-0.06376	-0.12141
0.01188	-0.06263	-0.15789	-0.1897	-0.0436	0.19674	0.32138	0.26852	0.15614	0.13982	0.13157	0.00525	-0.10017	0.0135	0.17685	0.21994	0.25371	0.21158	0.00533	-0.12978	-0.04119	0.10628	0.17525	0.21971	0.24018	0.24989	0.20646	0.17224	0.29626	0.4783	0.50945	0.44223	0.36184	0.39261	0.54592	0.58065	0.44445	0.39234	0.42693	0.39621	0.30572	0.29979	0.3983	0.46186	0.38247	0.34582	0.29308	0.11129	-0.0586	-0.11857
0.01212	-0.06379	-0.16028	-0.1905	-0.04287	0.19256	0.31546	0.26678	0.15406	0.13806	0.13317	0.00374	-0.10839	0.00462	0.17294	0.21968	0.25219	0.20893	0.00488	-0.12824	-0.03854	0.10941	0.17608	0.21901	0.23982	0.24767	0.1971	0.15325	0.27754	0.47108	0.50793	0.4415	0.36507	0.3994	0.55432	0.58979	0.45336	0.40042	0.43433	0.40273	0.3102	0.30061	0.39681	0.463	0.39084	0.35651	0.29626	0.11253	-0.05362	-0.11563
0.01237	-0.06466	-0.16217	-0.19075	-0.04152	0.18876	0.30957	0.2649	0.15207	0.13661	0.13492	0.00239	-0.11652	-0.00485	0.16808	0.219	0.25082	0.20656	0.00485	-0.12607	-0.03524	0.11314	0.17733	0.21841	0.23948	0.24553	0.18802	0.13467	0.25899	0.46379	0.50634	0.44055	0.36779	0.40564	0.56232	0.59872	0.46223	0.40848	0.44172	0.40928	0.3145	0.30082	0.39437	0.46318	0.39857	0.36672	0.29891	0.11335	-0.04881	-0.11257
0.01261	-0.06527	-0.16359	-0.19046	-0.03956	0.18534	0.30374	0.26286	0.15016	0.13543	0.13679	0.00122	-0.12453	-0.0149	0.16223	0.21785	0.2496	0.20447	0.00522	-0.1233	-0.03134	0.11746	0.17899	0.21789	0.23914	0.24349	0.17924	0.11659	0.2407	0.45644	0.50468	0.43941	0.37	0.41128	0.56988	0.60742	0.47103	0.41643	0.44904	0.41581	0.31859	0.30036	0.39095	0.46234	0.4056	0.37638	0.30101	0.11375	-0.04419	-0.10943
0.01285	-0.0656	-0.16455	-0.18964	-0.03702	0.1823	0.29796	0.26065	0.14828	0.1345	0.13875	0.000247408	-0.13237	-0.0255	0.15535	0.2162	0.24851	0.20264	0.00596	-0.11997	-0.02686	0.12232	0.18103	0.21742	0.23879	0.24154	0.1708	0.0991	0.22277	0.44909	0.50296	0.4381	0.37169	0.41629	0.57696	0.61585	0.47973	0.42419	0.45618	0.42224	0.32239	0.29917	0.38652	0.46047	0.41186	0.38544	0.30256	0.11377	-0.03974	-0.10619
0.01309	-0.06569	-0.16506	-0.18833	-0.03394	0.17963	0.29224	0.25824	0.14642	0.13378	0.14078	-0.0005313	-0.13999	-0.03663	0.14744	0.21402	0.24755	0.20107	0.00704	-0.11612	-0.02186	0.1277	0.18345	0.217	0.23841	0.23967	0.16273	0.08226	0.20528	0.44175	0.50118	0.43662	0.37285	0.42064	0.58353	0.62399	0.4883	0.43172	0.46307	0.42853	0.32587	0.29723	0.38107	0.45755	0.41731	0.39382	0.30359	0.11345	-0.03546	-0.10287
0.01334	-0.06554	-0.16515	-0.18656	-0.03034	0.17733	0.28659	0.25564	0.14455	0.13324	0.14283	-0.00111	-0.14736	-0.04826	0.13849	0.21129	0.24671	0.19972	0.00844	-0.11181	-0.01638	0.13354	0.18621	0.2166	0.23797	0.23789	0.15506	0.06618	0.18832	0.43446	0.49933	0.43499	0.37348	0.42431	0.58956	0.63183	0.49671	0.43894	0.46965	0.43462	0.32897	0.29451	0.3746	0.45357	0.42189	0.40148	0.30409	0.11282	-0.03134	-0.09947
0.01358	-0.06516	-0.16486	-0.18437	-0.02628	0.17538	0.28102	0.25282	0.14264	0.13284	0.14488	-0.00148	-0.15445	-0.06035	0.12851	0.208	0.24596	0.1986	0.01011	-0.10707	-0.01048	0.1398	0.18929	0.21621	0.23746	0.23617	0.14784	0.05092	0.17199	0.42724	0.49742	0.43322	0.3736	0.42728	0.595	0.63934	0.50495	0.4458	0.47583	0.44047	0.33166	0.29096	0.3671	0.44853	0.42555	0.40838	0.3041	0.11194	-0.02737	-0.09599
0.01382	-0.06459	-0.1642	-0.18179	-0.0218	0.17378	0.27555	0.24978	0.14066	0.13253	0.14689	-0.00166	-0.16122	-0.07286	0.11751	0.20415	0.2453	0.19766	0.01203	-0.10196	-0.00421	0.14644	0.19267	0.21581	0.23684	0.23453	0.14108	0.03656	0.15634	0.42011	0.49544	0.43132	0.3732	0.42953	0.59984	0.64648	0.51298	0.45226	0.48157	0.44604	0.3339	0.28659	0.35858	0.44244	0.42829	0.41447	0.30364	0.11086	-0.02352	-0.09245
0.01406	-0.06383	-0.16323	-0.17889	-0.01696	0.17251	0.27018	0.24654	0.13861	0.13227	0.14882	-0.00164	-0.16765	-0.08573	0.10553	0.19974	0.2447	0.1969	0.01414	-0.09653	0.00238	0.15341	0.19631	0.21539	0.23611	0.23293	0.1348	0.02316	0.14147	0.41308	0.49337	0.4293	0.37229	0.43107	0.60405	0.65326	0.52079	0.45828	0.48682	0.4513	0.33568	0.28138	0.34906	0.43531	0.43006	0.41973	0.30274	0.10964	-0.01977	-0.08885
0.01431	-0.06291	-0.16197	-0.1757	-0.01181	0.17156	0.26494	0.24308	0.13645	0.13202	0.15064	-0.00144	-0.17371	-0.09893	0.09262	0.19477	0.24416	0.19627	0.01642	-0.09084	0.00921	0.16065	0.20021	0.21492	0.23522	0.23138	0.12904	0.0108	0.12742	0.40618	0.4912	0.42716	0.37091	0.43189	0.60759	0.65963	0.52836	0.46381	0.49153	0.45622	0.33696	0.27533	0.33857	0.42718	0.43085	0.42413	0.30144	0.10832	-0.0161	-0.08518
0.01455	-0.06184	-0.16045	-0.17227	-0.00642	0.1709	0.25983	0.23942	0.13418	0.13174	0.15231	-0.00108	-0.17939	-0.11238	0.07884	0.18926	0.24365	0.19576	0.01883	-0.08494	0.01624	0.16811	0.20432	0.21441	0.23416	0.22986	0.12381	-0.000486627	0.11426	0.39939	0.48892	0.42491	0.36905	0.43199	0.61046	0.66557	0.53567	0.46884	0.49569	0.46079	0.33774	0.26846	0.32715	0.41807	0.43067	0.42765	0.29977	0.10698	-0.01249	-0.08146
0.01479	-0.06065	-0.15871	-0.16865	-0.000850382	0.17052	0.25488	0.23559	0.1318	0.1314	0.15379	-0.000572569	-0.18468	-0.12603	0.06425	0.18324	0.24315	0.19533	0.02132	-0.0789	0.02338	0.17572	0.20863	0.21383	0.2329	0.22834	0.11911	-0.01064	0.10203	0.39272	0.4865	0.42257	0.36675	0.43138	0.61263	0.67107	0.5427	0.47335	0.49927	0.465	0.33801	0.26079	0.31483	0.40803	0.42951	0.4303	0.29777	0.10567	-0.00891	-0.0777
0.01503	-0.05935	-0.15678	-0.1649	0.00485	0.17041	0.2501	0.2316	0.12929	0.13095	0.15504	5.66262e-05	-0.18958	-0.13981	0.04894	0.17672	0.24265	0.19495	0.02386	-0.07276	0.03059	0.18344	0.21309	0.21317	0.23142	0.22681	0.11497	-0.01963	0.09077	0.38616	0.48393	0.42013	0.36403	0.43008	0.61408	0.6761	0.54943	0.47733	0.50226	0.46883	0.33778	0.25233	0.30166	0.39711	0.42739	0.43206	0.2955	0.10445	-0.00534	-0.07389
0.01528	-0.05797	-0.1547	-0.16106	0.0106	0.17052	0.2455	0.22748	0.12668	0.13038	0.15605	0.00077701	-0.19408	-0.15367	0.03299	0.16974	0.24212	0.19459	0.0264	-0.0666	0.03777	0.1912	0.21769	0.21243	0.22968	0.22524	0.11137	-0.02743	0.08049	0.3797	0.48118	0.4176	0.36091	0.42809	0.61481	0.68064	0.55584	0.48076	0.50468	0.47231	0.33705	0.24314	0.28771	0.38535	0.42432	0.43296	0.29298	0.10338	-0.00176	-0.07006
0.01552	-0.05651	-0.1525	-0.15717	0.01636	0.17085	0.24111	0.22327	0.12396	0.12965	0.15678	0.00156	-0.19822	-0.16753	0.0165	0.16233	0.24153	0.19422	0.02892	-0.06046	0.04488	0.19892	0.2224	0.21158	0.22767	0.2236	0.10832	-0.03402	0.07122	0.37332	0.47824	0.415	0.35743	0.42545	0.61481	0.68466	0.5619	0.48366	0.50654	0.47543	0.33584	0.23325	0.27303	0.37282	0.42033	0.43299	0.29028	0.10251	0.00186	-0.0662
0.01576	-0.05502	-0.15022	-0.15329	0.02206	0.17137	0.23694	0.21899	0.12114	0.12873	0.15719	0.00236	-0.20199	-0.18133	-0.000414798	0.15454	0.24085	0.19382	0.03139	-0.05441	0.05182	0.20656	0.22717	0.21062	0.22535	0.22188	0.1058	-0.03941	0.06296	0.367	0.47507	0.41233	0.35362	0.42218	0.61407	0.68815	0.56761	0.48601	0.50784	0.47821	0.33417	0.22271	0.25768	0.35957	0.41546	0.43219	0.28743	0.10189	0.00553	-0.06233
0.016	-0.05349	-0.14788	-0.14946	0.02763	0.17205	0.23301	0.21468	0.11825	0.12761	0.15726	0.00314	-0.20544	-0.19501	-0.01766	0.1464	0.24008	0.19333	0.03376	-0.0485	0.05853	0.21404	0.23197	0.20953	0.22271	0.22004	0.1038	-0.04359	0.0557	0.36071	0.47166	0.40959	0.3495	0.41829	0.61259	0.69107	0.57294	0.48785	0.50863	0.48066	0.33205	0.21157	0.24174	0.34568	0.40973	0.43057	0.28449	0.10158	0.00928	-0.05845
0.01625	-0.05194	-0.14552	-0.14573	0.03303	0.17287	0.22932	0.21038	0.11529	0.12627	0.15697	0.00386	-0.20858	-0.20849	-0.03511	0.13797	0.23916	0.19275	0.036	-0.04279	0.06493	0.22129	0.23679	0.20832	0.21971	0.21804	0.10229	-0.04659	0.04941	0.35442	0.46799	0.40679	0.34512	0.41381	0.61038	0.69342	0.57786	0.48917	0.50893	0.48281	0.32953	0.1999	0.22527	0.33121	0.4032	0.42818	0.2815	0.10161	0.01313	-0.05457
0.01649	-0.05041	-0.14315	-0.14212	0.03821	0.17381	0.22589	0.20613	0.11229	0.12468	0.1563	0.00447	-0.21147	-0.22173	-0.05264	0.12929	0.23809	0.19204	0.0381	-0.03733	0.07096	0.22825	0.24158	0.20696	0.21634	0.21587	0.10125	-0.04843	0.04408	0.34811	0.46402	0.40395	0.3405	0.40877	0.60744	0.69517	0.58235	0.49001	0.50878	0.48466	0.32661	0.18775	0.20836	0.31622	0.3959	0.42504	0.2785	0.10204	0.01708	-0.05069
0.01673	-0.04888	-0.14082	-0.13869	0.04312	0.17485	0.22274	0.20197	0.10927	0.12284	0.15521	0.00493	-0.21413	-0.23465	-0.07015	0.12041	0.23683	0.19117	0.04003	-0.03217	0.07653	0.23485	0.24631	0.20546	0.21259	0.21349	0.10064	-0.04916	0.03966	0.34173	0.45974	0.40106	0.33567	0.4032	0.60377	0.69631	0.58639	0.49037	0.50822	0.48624	0.32333	0.17521	0.19109	0.30081	0.38789	0.42119	0.27553	0.10288	0.02115	-0.04682
0.01697	-0.04739	-0.13853	-0.13545	0.04772	0.17597	0.21988	0.19795	0.10625	0.12072	0.1537	0.00517	-0.21662	-0.24721	-0.08751	0.11138	0.23536	0.19012	0.04176	-0.02736	0.08159	0.24104	0.25096	0.20382	0.20843	0.21089	0.10044	-0.04883	0.03611	0.33526	0.45513	0.39813	0.33067	0.39713	0.5994	0.69682	0.58996	0.49029	0.5073	0.48757	0.31974	0.16233	0.17353	0.28503	0.37922	0.41666	0.27263	0.10416	0.02534	-0.04297
0.01722	-0.04593	-0.1363	-0.13243	0.05197	0.17715	0.21732	0.19409	0.10325	0.11833	0.15174	0.00517	-0.21897	-0.25934	-0.1046	0.10225	0.23365	0.18887	0.04328	-0.02295	0.08606	0.24676	0.2555	0.20203	0.20386	0.20802	0.1006	-0.04748	0.03337	0.32865	0.45017	0.39517	0.32552	0.39057	0.59432	0.69668	0.59302	0.48978	0.50605	0.48866	0.31586	0.14921	0.15577	0.26897	0.36995	0.41151	0.26982	0.10591	0.02967	-0.03914
0.01746	-0.04452	-0.13415	-0.12965	0.05587	0.17838	0.21506	0.19044	0.10031	0.11565	0.14932	0.00486	-0.22123	-0.27099	-0.1213	0.09308	0.23168	0.18739	0.04458	-0.01899	0.08989	0.25194	0.25991	0.20009	0.19888	0.20489	0.10108	-0.04519	0.0314	0.32187	0.44483	0.39216	0.32025	0.38356	0.58857	0.6959	0.59556	0.48886	0.50454	0.48955	0.31174	0.13593	0.1379	0.2527	0.36013	0.40576	0.26712	0.10812	0.03412	-0.03533
0.0177	-0.04317	-0.13209	-0.12713	0.05938	0.17965	0.21312	0.18704	0.09743	0.11269	0.14644	0.00421	-0.22345	-0.2821	-0.13751	0.08391	0.22943	0.18568	0.04562	-0.01549	0.09302	0.25656	0.26417	0.19803	0.19348	0.20148	0.10185	-0.04203	0.03011	0.31489	0.4391	0.3891	0.31486	0.37612	0.58215	0.69445	0.59755	0.48756	0.5028	0.49026	0.30742	0.12256	0.12001	0.2363	0.34982	0.39945	0.26457	0.1108	0.0387	-0.03155
0.01794	-0.04187	-0.13012	-0.12486	0.0625	0.18095	0.2115	0.18393	0.09465	0.10943	0.14308	0.00317	-0.22567	-0.29264	-0.15311	0.07478	0.22688	0.18372	0.04642	-0.01252	0.0954	0.26056	0.26825	0.19583	0.18767	0.19777	0.10286	-0.03806	0.02946	0.30767	0.43295	0.38599	0.30939	0.36827	0.57509	0.69233	0.59895	0.4859	0.50088	0.4908	0.30294	0.1092	0.10217	0.21984	0.33907	0.39264	0.26217	0.11395	0.04341	-0.02779
0.01819	-0.04064	-0.12826	-0.12286	0.06523	0.18226	0.2102	0.18112	0.09198	0.1059	0.13926	0.0017	-0.22793	-0.30256	-0.16802	0.06574	0.22401	0.18148	0.04694	-0.01008	0.09699	0.2639	0.27216	0.1935	0.18147	0.19376	0.10408	-0.03338	0.02936	0.30019	0.42636	0.3828	0.30383	0.36003	0.56743	0.68953	0.59975	0.4839	0.49883	0.4912	0.29835	0.09592	0.08449	0.2034	0.32794	0.38535	0.25994	0.11756	0.04823	-0.02405
0.01843	-0.03947	-0.12649	-0.12111	0.06756	0.18358	0.20921	0.17864	0.08945	0.10209	0.13497	-0.000214882	-0.23027	-0.31182	-0.18214	0.05682	0.22079	0.17896	0.04719	-0.00822	0.09775	0.26656	0.27586	0.19107	0.1749	0.18946	0.10546	-0.02805	0.02975	0.2924	0.41932	0.37951	0.29819	0.35143	0.55918	0.68607	0.59991	0.48157	0.49669	0.49148	0.29369	0.08281	0.06702	0.18703	0.31648	0.37763	0.25788	0.1216	0.05317	-0.02033
0.01867	-0.03837	-0.12483	-0.11961	0.0695	0.18489	0.20853	0.17651	0.08707	0.09801	0.13023	-0.00261	-0.23273	-0.32039	-0.1954	0.04805	0.21721	0.17615	0.04715	-0.00694	0.09767	0.26852	0.27934	0.18853	0.16796	0.18487	0.10698	-0.02217	0.03055	0.28428	0.4118	0.3761	0.29247	0.34249	0.55038	0.68194	0.59942	0.47894	0.49451	0.49165	0.289	0.06994	0.04986	0.1708	0.30476	0.36954	0.25602	0.12607	0.05821	-0.01662
0.01891	-0.03733	-0.12326	-0.11834	0.07106	0.18619	0.20814	0.17474	0.08485	0.09367	0.12505	-0.00551	-0.23533	-0.32826	-0.20772	0.03947	0.21325	0.17303	0.04683	-0.00626	0.09671	0.26975	0.2826	0.1859	0.16069	0.18	0.10859	-0.01581	0.03169	0.27581	0.40378	0.37255	0.28668	0.33321	0.54107	0.67715	0.59825	0.47603	0.49233	0.49173	0.28432	0.05741	0.03308	0.15477	0.2928	0.36109	0.25434	0.13095	0.06334	-0.01292
0.01916	-0.03636	-0.12178	-0.1173	0.07228	0.18747	0.20802	0.17334	0.0828	0.08908	0.11944	-0.00892	-0.23809	-0.3354	-0.21907	0.03109	0.20889	0.1696	0.04622	-0.0062	0.09487	0.27026	0.28561	0.18318	0.15311	0.17488	0.11026	-0.00907	0.0331	0.26697	0.39526	0.36882	0.28079	0.32364	0.53127	0.6717	0.59639	0.47286	0.49018	0.49174	0.27969	0.04527	0.01674	0.13899	0.28067	0.35235	0.25285	0.13619	0.06857	-0.0092
0.0194	-0.03545	-0.12039	-0.11645	0.07316	0.18872	0.20815	0.17229	0.08092	0.08425	0.11342	-0.01284	-0.24105	-0.34178	-0.22939	0.02293	0.20412	0.16584	0.04531	-0.00675	0.09216	0.27003	0.28839	0.1804	0.14527	0.16953	0.11197	-0.00202	0.03471	0.25776	0.38622	0.36489	0.27481	0.31378	0.52104	0.66562	0.59382	0.46944	0.48809	0.49167	0.27514	0.03359	0.00091766	0.12351	0.26841	0.34335	0.25155	0.14179	0.07388	-0.00546
0.01964	-0.0346	-0.11908	-0.11578	0.07375	0.18995	0.20851	0.1716	0.0792	0.0792	0.10703	-0.01727	-0.24421	-0.34742	-0.23864	0.015	0.19894	0.16176	0.04412	-0.00791	0.08857	0.26907	0.2909	0.17755	0.13718	0.16397	0.11369	0.00526	0.03647	0.24818	0.37666	0.36071	0.26873	0.30366	0.5104	0.65891	0.59053	0.46579	0.48609	0.49154	0.2707	0.02244	-0.01434	0.10838	0.25606	0.33412	0.25044	0.14769	0.07926	-0.00168
0.01988	-0.03381	-0.11783	-0.11526	0.07407	0.19114	0.20907	0.17123	0.07765	0.07393	0.10028	-0.0222	-0.24757	-0.35229	-0.24682	0.00732	0.19333	0.15735	0.04264	-0.00966	0.08413	0.2674	0.29315	0.17464	0.12889	0.15823	0.1154	0.01268	0.03831	0.23822	0.36657	0.35626	0.26253	0.2933	0.4994	0.6516	0.58654	0.46194	0.4842	0.49134	0.2664	0.01188	-0.02897	0.09362	0.24365	0.32471	0.24951	0.15387	0.0847	0.00214
0.02013	-0.03308	-0.11665	-0.11487	0.07416	0.1923	0.2098	0.17117	0.07624	0.06845	0.0932	-0.02762	-0.25114	-0.3564	-0.2539	-0.000112396	0.18728	0.15261	0.04089	-0.012	0.07886	0.26502	0.29513	0.17169	0.12044	0.15235	0.11707	0.02017	0.04017	0.22791	0.35597	0.35149	0.25619	0.28272	0.48807	0.6437	0.58182	0.45789	0.48244	0.49108	0.26226	0.00195	-0.04292	0.07929	0.23122	0.31514	0.24875	0.16028	0.0902	0.00604
0.02037	-0.0324	-0.11552	-0.11457	0.07407	0.19343	0.21066	0.17138	0.07496	0.06278	0.08582	-0.03349	-0.25491	-0.35975	-0.2599	-0.00729	0.18081	0.14756	0.03888	-0.0149	0.0728	0.26197	0.29683	0.16869	0.11187	0.14637	0.11869	0.02768	0.04203	0.21726	0.34485	0.34638	0.2497	0.27194	0.47647	0.63525	0.5764	0.45366	0.4808	0.49074	0.25829	-0.0073	-0.05616	0.0654	0.21881	0.30546	0.24814	0.16689	0.09575	0.01002
0.02061	-0.03176	-0.11443	-0.11434	0.07383	0.19454	0.21162	0.17182	0.07378	0.05692	0.07819	-0.03978	-0.25885	-0.36234	-0.26481	-0.01421	0.17391	0.14218	0.03662	-0.01833	0.066	0.25827	0.29824	0.16565	0.10321	0.14031	0.12026	0.03513	0.04383	0.20631	0.33324	0.34089	0.24305	0.26098	0.46462	0.62627	0.57029	0.44926	0.47929	0.49031	0.25452	-0.01585	-0.06864	0.05199	0.20644	0.29569	0.24768	0.17366	0.10133	0.0141
0.02085	-0.03117	-0.11338	-0.11414	0.07349	0.19561	0.21264	0.17246	0.07268	0.05089	0.07034	-0.04645	-0.26295	-0.36419	-0.26866	-0.02089	0.1666	0.1365	0.03413	-0.02225	0.05849	0.25396	0.29936	0.16257	0.09451	0.13424	0.12177	0.04248	0.04555	0.19509	0.32114	0.33498	0.23621	0.24988	0.45258	0.61679	0.5635	0.4447	0.47791	0.48978	0.25095	-0.02365	-0.08033	0.03908	0.19416	0.28587	0.24734	0.18053	0.10695	0.01829
0.0211	-0.03061	-0.11235	-0.11396	0.0731	0.19666	0.21368	0.17325	0.07164	0.04471	0.06231	-0.05346	-0.26718	-0.36531	-0.27148	-0.0273	0.1589	0.13053	0.03142	-0.02664	0.05034	0.24907	0.30019	0.15944	0.0858	0.12818	0.12321	0.04969	0.04717	0.18363	0.30859	0.32861	0.22917	0.23864	0.44039	0.60686	0.55605	0.43999	0.47663	0.48913	0.24758	-0.03069	-0.09121	0.02668	0.18198	0.27604	0.24711	0.18748	0.11259	0.02261
0.02134	-0.03009	-0.11134	-0.11375	0.07269	0.19768	0.21471	0.17413	0.07064	0.03839	0.05414	-0.06073	-0.27149	-0.36571	-0.2733	-0.03347	0.15082	0.12429	0.02852	-0.03143	0.04163	0.24366	0.30073	0.15628	0.07712	0.12218	0.1246	0.05672	0.04868	0.172	0.2956	0.32176	0.22192	0.22732	0.42808	0.59651	0.54798	0.43514	0.47545	0.48834	0.24442	-0.03696	-0.10125	0.01482	0.16994	0.26622	0.24697	0.19446	0.11825	0.02706
0.02158	-0.0296	-0.11033	-0.1135	0.07231	0.19869	0.21568	0.17506	0.06964	0.03196	0.0459	-0.06823	-0.27586	-0.36541	-0.27416	-0.0394	0.14239	0.1178	0.02545	-0.03659	0.03241	0.23778	0.30096	0.15308	0.06851	0.11629	0.12594	0.06354	0.05005	0.16023	0.2822	0.31441	0.21444	0.21592	0.41571	0.58577	0.53931	0.43015	0.47433	0.48739	0.24145	-0.04245	-0.11045	0.00351	0.15807	0.25645	0.24692	0.20142	0.12393	0.03167
0.02182	-0.02915	-0.10933	-0.11316	0.07201	0.19967	0.21654	0.17598	0.06863	0.02545	0.03762	-0.07588	-0.28023	-0.36444	-0.27412	-0.04508	0.13366	0.11109	0.02224	-0.04205	0.02277	0.23147	0.30089	0.14984	0.06001	0.11055	0.12725	0.07014	0.0513	0.14837	0.26844	0.30652	0.20673	0.20449	0.40332	0.5747	0.5301	0.42503	0.47324	0.48624	0.23868	-0.04717	-0.11881	-0.00725	0.1464	0.24678	0.24694	0.20836	0.12962	0.03643
0.02207	-0.02872	-0.10832	-0.11273	0.07181	0.20063	0.21727	0.17684	0.06758	0.01888	0.02936	-0.08361	-0.28457	-0.36284	-0.27322	-0.05052	0.12464	0.1042	0.01893	-0.04776	0.01279	0.22479	0.30052	0.14655	0.05165	0.10501	0.12855	0.0765	0.05242	0.13649	0.25434	0.29809	0.19879	0.19307	0.39096	0.56333	0.52037	0.41978	0.47215	0.48488	0.23609	-0.05113	-0.12632	-0.01745	0.13496	0.23724	0.24703	0.21522	0.13532	0.04136
0.02231	-0.02832	-0.10731	-0.11218	0.07176	0.20156	0.2178	0.17759	0.06647	0.01229	0.02117	-0.09136	-0.28882	-0.36061	-0.27153	-0.05571	0.1154	0.09716	0.01555	-0.05366	0.00255	0.2178	0.29986	0.14322	0.04348	0.0997	0.12985	0.08263	0.05342	0.12465	0.23995	0.2891	0.19061	0.1817	0.37865	0.55171	0.51018	0.41441	0.47103	0.48327	0.23366	-0.05434	-0.13298	-0.02709	0.12378	0.22788	0.24718	0.22199	0.14102	0.04648
0.02255	-0.02795	-0.1063	-0.11148	0.07188	0.20246	0.21811	0.17816	0.06528	0.0057	0.0131	-0.09906	-0.29295	-0.35782	-0.26911	-0.06067	0.10598	0.09002	0.01215	-0.05968	-0.00787	0.21055	0.2989	0.13985	0.03551	0.09467	0.13117	0.08851	0.05431	0.11288	0.22532	0.27954	0.18219	0.17041	0.36646	0.53989	0.49957	0.40891	0.46982	0.48139	0.23137	-0.05683	-0.13882	-0.03617	0.11288	0.21874	0.2474	0.22865	0.14674	0.05177
0.02279	-0.02761	-0.10527	-0.11063	0.07221	0.20333	0.21816	0.17851	0.064	-0.000853297	0.00519	-0.10664	-0.29691	-0.35448	-0.26602	-0.06538	0.09642	0.08282	0.00877	-0.06576	-0.01837	0.2031	0.29764	0.13644	0.02779	0.08994	0.13254	0.09416	0.05511	0.10127	0.21048	0.26943	0.17356	0.15925	0.35442	0.5279	0.48859	0.40329	0.46849	0.4792	0.22922	-0.05863	-0.14386	-0.04469	0.10231	0.20987	0.2477	0.23518	0.15248	0.05725
0.02304	-0.0273	-0.10425	-0.10961	0.07275	0.20416	0.2179	0.1786	0.06261	-0.00733	-0.0025	-0.11405	-0.30065	-0.35063	-0.26232	-0.06985	0.08678	0.07561	0.00546	-0.07182	-0.02888	0.1955	0.2961	0.13298	0.02033	0.08555	0.13395	0.09958	0.05582	0.08985	0.19549	0.25876	0.16471	0.14826	0.34256	0.51579	0.47731	0.39754	0.46698	0.47668	0.22716	-0.05976	-0.1481	-0.05266	0.09209	0.20131	0.24807	0.24157	0.15822	0.06291
0.02328	-0.02702	-0.10322	-0.10842	0.07353	0.20493	0.2173	0.17838	0.0611	-0.0137	-0.00992	-0.12123	-0.30415	-0.34632	-0.25808	-0.07407	0.07712	0.06844	0.00226	-0.0778	-0.0393	0.18782	0.29427	0.12949	0.01317	0.08151	0.13544	0.10477	0.05647	0.07867	0.1804	0.24755	0.15567	0.13748	0.33092	0.50359	0.46575	0.39167	0.46525	0.4738	0.22519	-0.06029	-0.15159	-0.06008	0.08224	0.19311	0.24852	0.2478	0.16398	0.06875
0.02352	-0.02677	-0.10219	-0.10706	0.07455	0.20563	0.21634	0.1778	0.05946	-0.01993	-0.01705	-0.12812	-0.30736	-0.34159	-0.25334	-0.07802	0.06749	0.06137	-0.000781732	-0.08364	-0.04956	0.1801	0.29217	0.12595	0.00633	0.07784	0.137	0.10975	0.05706	0.0678	0.16526	0.23582	0.14646	0.12695	0.31952	0.49134	0.45399	0.38567	0.46325	0.47052	0.22326	-0.06023	-0.15435	-0.06695	0.07281	0.18531	0.24907	0.25388	0.16976	0.07478
0.02376	-0.02656	-0.10117	-0.10552	0.07581	0.20625	0.21497	0.17684	0.05768	-0.02599	-0.02384	-0.13466	-0.31025	-0.33646	-0.24818	-0.08172	0.05796	0.05444	-0.00362	-0.08926	-0.05956	0.1724	0.28979	0.12238	-0.000193236	0.07456	0.13865	0.11452	0.05762	0.05726	0.15012	0.2236	0.1371	0.11672	0.3084	0.47908	0.44205	0.37955	0.46094	0.46683	0.22134	-0.05966	-0.15642	-0.07328	0.06382	0.17797	0.24973	0.25979	0.17556	0.08097
0.02401	-0.02639	-0.10017	-0.10382	0.07731	0.20676	0.21318	0.17546	0.05577	-0.03183	-0.03024	-0.1408	-0.31279	-0.33099	-0.24265	-0.08513	0.04857	0.0477	-0.00621	-0.09461	-0.06925	0.16477	0.28715	0.11877	-0.00637	0.07167	0.14039	0.11911	0.05814	0.04709	0.13503	0.21092	0.12762	0.10682	0.29757	0.46683	0.43	0.37329	0.45827	0.46269	0.21942	-0.05862	-0.15783	-0.07909	0.0553	0.17111	0.25052	0.26555	0.18138	0.08733
0.02425	-0.02625	-0.09919	-0.10196	0.07902	0.20715	0.21092	0.17364	0.05373	-0.03743	-0.03623	-0.14651	-0.31495	-0.3252	-0.23679	-0.08825	0.03939	0.04121	-0.00852	-0.09964	-0.07853	0.15727	0.28427	0.11512	-0.0122	0.06917	0.14223	0.12351	0.05865	0.03734	0.12004	0.19783	0.11805	0.09728	0.28706	0.45462	0.41788	0.3669	0.4552	0.45808	0.21745	-0.05716	-0.15862	-0.08436	0.04727	0.16478	0.25144	0.27115	0.18722	0.09385
0.02449	-0.02616	-0.09824	-0.09996	0.08094	0.20738	0.20819	0.17134	0.05155	-0.04275	-0.04176	-0.15174	-0.31671	-0.31914	-0.23066	-0.09107	0.03048	0.03501	-0.01051	-0.10428	-0.08735	0.14994	0.28116	0.11144	-0.01768	0.06705	0.14416	0.12775	0.05914	0.02802	0.10521	0.18436	0.10843	0.08816	0.27689	0.44247	0.40572	0.36038	0.4517	0.45299	0.21539	-0.05535	-0.15883	-0.08912	0.03978	0.15903	0.25251	0.27659	0.19309	0.10051
0.02473	-0.02611	-0.09734	-0.09785	0.08303	0.20743	0.20494	0.16856	0.04924	-0.04776	-0.04683	-0.15646	-0.31805	-0.31284	-0.22431	-0.09358	0.02188	0.02914	-0.01214	-0.10851	-0.09565	0.14283	0.27785	0.10774	-0.0228	0.06532	0.1462	0.13183	0.05964	0.01915	0.09057	0.17056	0.09878	0.07947	0.26707	0.43041	0.39358	0.35372	0.44773	0.4474	0.21323	-0.05325	-0.15849	-0.09336	0.03284	0.15388	0.25376	0.28189	0.19899	0.10731
0.02498	-0.02612	-0.09649	-0.09563	0.08528	0.20726	0.20116	0.16526	0.04681	-0.05243	-0.05139	-0.16065	-0.31897	-0.30635	-0.21776	-0.09575	0.01365	0.02365	-0.0134	-0.11228	-0.10337	0.13599	0.27435	0.10402	-0.02756	0.06395	0.14834	0.13575	0.06013	0.01074	0.07618	0.15649	0.08915	0.07124	0.25762	0.41846	0.38147	0.34693	0.44326	0.4413	0.21092	-0.05091	-0.15766	-0.09709	0.02647	0.14936	0.25519	0.28705	0.20492	0.11424
0.02522	-0.02618	-0.09572	-0.09333	0.08763	0.20684	0.19682	0.16143	0.04427	-0.05671	-0.05542	-0.16427	-0.31944	-0.29969	-0.21108	-0.09758	0.00585	0.01858	-0.01426	-0.11556	-0.11047	0.12946	0.27069	0.1003	-0.03197	0.06294	0.15057	0.13954	0.06062	0.00281	0.06209	0.14221	0.07958	0.06351	0.24854	0.40663	0.36944	0.34	0.43829	0.4347	0.20845	-0.0484	-0.15637	-0.10031	0.02071	0.1455	0.25682	0.29209	0.21089	0.12128
0.02546	-0.0263	-0.09502	-0.09098	0.09007	0.20615	0.19189	0.15706	0.04163	-0.0606	-0.05891	-0.16733	-0.31946	-0.29291	-0.20429	-0.09906	-0.0015	0.01395	-0.01471	-0.11835	-0.11692	0.1233	0.26691	0.09658	-0.03603	0.06226	0.15289	0.14318	0.0611	-0.00465	0.04832	0.12777	0.07009	0.0563	0.23985	0.39495	0.35752	0.33294	0.43279	0.42759	0.20578	-0.04577	-0.15468	-0.10304	0.01556	0.14233	0.25867	0.29702	0.21689	0.12843
0.0257	-0.02648	-0.09441	-0.0886	0.09255	0.20513	0.18635	0.15215	0.0389	-0.06405	-0.06184	-0.1698	-0.31906	-0.28604	-0.19744	-0.10019	-0.00836	0.00979	-0.01476	-0.12064	-0.12268	0.11752	0.26304	0.09289	-0.03973	0.06191	0.15528	0.14669	0.06155	-0.01165	0.03491	0.11324	0.06073	0.04962	0.23157	0.38343	0.34573	0.32574	0.42677	0.41999	0.20289	-0.04308	-0.15261	-0.10528	0.01105	0.13985	0.26075	0.30185	0.22291	0.13567
0.02595	-0.02672	-0.09391	-0.08622	0.09501	0.20375	0.18019	0.14667	0.03608	-0.06704	-0.06421	-0.17169	-0.31821	-0.27913	-0.19056	-0.10095	-0.01468	0.00612	-0.0144	-0.12242	-0.12773	0.11219	0.25912	0.08923	-0.04309	0.06186	0.15774	0.15005	0.06197	-0.01821	0.02189	0.09867	0.05153	0.0435	0.2237	0.37208	0.33408	0.31843	0.42022	0.41191	0.19977	-0.0404	-0.15023	-0.10703	0.00719	0.13808	0.26306	0.30659	0.22897	0.14298
0.02619	-0.02704	-0.09352	-0.08387	0.09743	0.20198	0.17339	0.14064	0.03319	-0.06956	-0.06599	-0.17298	-0.31695	-0.27222	-0.18368	-0.10134	-0.02046	0.00295	-0.01364	-0.1237	-0.13206	0.10732	0.25519	0.08563	-0.04611	0.06208	0.16025	0.15326	0.06234	-0.02435	0.00929	0.08413	0.04254	0.03795	0.21625	0.36092	0.32261	0.31099	0.41317	0.40337	0.19641	-0.03776	-0.14756	-0.10831	0.00397	0.13702	0.26563	0.31124	0.23505	0.15036
0.02643	-0.02742	-0.09324	-0.08157	0.09975	0.19978	0.16595	0.13405	0.03024	-0.0716	-0.06719	-0.1737	-0.31527	-0.26532	-0.17684	-0.10137	-0.02567	0.000277253	-0.01252	-0.1245	-0.13567	0.10295	0.25128	0.08212	-0.0488	0.06254	0.16278	0.15631	0.06262	-0.0301	-0.00288	0.06968	0.03378	0.03298	0.20923	0.34995	0.31131	0.30345	0.40563	0.39442	0.19278	-0.03523	-0.14465	-0.10912	0.00141	0.13667	0.26844	0.31583	0.24114	0.15779
0.02667	-0.02788	-0.0931	-0.07937	0.10191	0.19712	0.15786	0.12692	0.02724	-0.07312	-0.0678	-0.17383	-0.31319	-0.25849	-0.17008	-0.10104	-0.0303	-0.0019	-0.01106	-0.12484	-0.13855	0.09913	0.24745	0.0787	-0.05118	0.06322	0.16531	0.15917	0.06281	-0.03548	-0.01459	0.05537	0.02528	0.02861	0.20265	0.33919	0.30022	0.29581	0.39763	0.38507	0.18889	-0.03284	-0.14154	-0.10947	-0.00049973	0.13702	0.27152	0.32036	0.24724	0.16525
0.02692	-0.02841	-0.09309	-0.07728	0.10387	0.19397	0.14912	0.11925	0.02419	-0.07413	-0.06782	-0.1734	-0.31073	-0.25175	-0.1634	-0.10036	-0.03435	-0.00359	-0.00929	-0.12477	-0.1407	0.09586	0.24373	0.0754	-0.05326	0.06408	0.16781	0.16184	0.06285	-0.04055	-0.02584	0.04127	0.01708	0.02482	0.1965	0.32863	0.28933	0.2881	0.38921	0.37538	0.18473	-0.03065	-0.13827	-0.10938	-0.00176	0.13806	0.27484	0.32483	0.25334	0.17272
0.02716	-0.02901	-0.09322	-0.07533	0.10558	0.1903	0.13974	0.11107	0.02112	-0.07462	-0.06726	-0.1724	-0.30789	-0.24511	-0.15685	-0.09933	-0.03782	-0.00483	-0.00727	-0.12431	-0.14215	0.09319	0.24017	0.07223	-0.05504	0.06509	0.17026	0.16428	0.06273	-0.04533	-0.03661	0.02743	0.00921	0.02161	0.19078	0.31829	0.27865	0.28033	0.38041	0.36539	0.1803	-0.02868	-0.13487	-0.10884	-0.00237	0.13976	0.27842	0.32925	0.25943	0.18021
0.0274	-0.02968	-0.0935	-0.07357	0.10698	0.18608	0.12972	0.10239	0.01803	-0.07458	-0.06611	-0.17086	-0.3047	-0.23862	-0.15043	-0.09796	-0.04072	-0.00564	-0.00503	-0.12351	-0.14289	0.09112	0.23681	0.06922	-0.05656	0.06621	0.17263	0.16646	0.06242	-0.04988	-0.0469	0.0139	0.00168	0.01898	0.1855	0.30817	0.26819	0.27252	0.37127	0.35513	0.1756	-0.02698	-0.13137	-0.10786	-0.00236	0.14209	0.28224	0.33362	0.26549	0.18769
0.02764	-0.03042	-0.09392	-0.072	0.10804	0.18129	0.11908	0.09322	0.01492	-0.07402	-0.0644	-0.16878	-0.30115	-0.23227	-0.14418	-0.09627	-0.04307	-0.00605	-0.00265	-0.12243	-0.14297	0.08969	0.23368	0.06638	-0.05781	0.06741	0.17487	0.16837	0.06187	-0.05422	-0.0567	0.000741176	-0.00549	0.01692	0.18065	0.29826	0.25794	0.2647	0.36186	0.34466	0.17063	-0.02557	-0.1278	-0.10644	-0.00172	0.14503	0.28629	0.33794	0.27152	0.19515
0.02789	-0.03123	-0.0945	-0.07067	0.10869	0.17591	0.10783	0.0836	0.01181	-0.07295	-0.06213	-0.16619	-0.29727	-0.2261	-0.13809	-0.09427	-0.04489	-0.00611	-0.000172882	-0.12112	-0.14239	0.0889	0.23083	0.06373	-0.05883	0.06866	0.17696	0.16997	0.06106	-0.05839	-0.06603	-0.01201	-0.01227	0.0154	0.17621	0.28857	0.24792	0.25689	0.35222	0.33403	0.1654	-0.0245	-0.12418	-0.1046	-0.000489351	0.14854	0.29055	0.3422	0.2775	0.20258
0.02813	-0.03211	-0.09521	-0.06958	0.10889	0.16993	0.096	0.07355	0.00869	-0.07137	-0.05932	-0.16311	-0.29306	-0.2201	-0.1322	-0.09197	-0.04619	-0.00586	0.00233	-0.11963	-0.1412	0.08876	0.22828	0.06128	-0.05963	0.06992	0.17887	0.17122	0.05995	-0.06245	-0.07487	-0.02431	-0.01866	0.01441	0.17218	0.27907	0.23811	0.24912	0.34242	0.32328	0.1599	-0.02377	-0.12053	-0.10234	0.00132	0.15257	0.295	0.34639	0.2834	0.20999
0.02837	-0.03304	-0.09607	-0.06877	0.10862	0.16335	0.0836	0.06308	0.00557	-0.06931	-0.056	-0.15957	-0.28855	-0.21429	-0.1265	-0.0894	-0.04701	-0.00536	0.00479	-0.11803	-0.13942	0.08929	0.22606	0.05904	-0.06022	0.07116	0.18057	0.1721	0.05853	-0.06643	-0.08324	-0.03613	-0.02465	0.01392	0.16853	0.26978	0.22853	0.24143	0.33251	0.31248	0.15416	-0.02342	-0.11688	-0.09967	0.00369	0.15707	0.29961	0.35051	0.28923	0.21735
0.02861	-0.03403	-0.09706	-0.06824	0.10784	0.15615	0.07067	0.05221	0.00244	-0.06679	-0.05219	-0.15557	-0.28374	-0.20868	-0.12103	-0.08658	-0.04739	-0.00465	0.00714	-0.11637	-0.1371	0.09047	0.2242	0.05701	-0.06062	0.07236	0.18203	0.17258	0.05675	-0.07037	-0.09114	-0.04742	-0.03023	0.01389	0.16525	0.26068	0.21916	0.23384	0.32259	0.30168	0.14819	-0.02345	-0.11324	-0.09658	0.00659	0.162	0.30435	0.35453	0.29495	0.22468
0.02886	-0.03505	-0.09818	-0.068	0.10653	0.14834	0.05723	0.04098	-0.000707714	-0.06383	-0.04791	-0.15115	-0.27864	-0.20328	-0.11578	-0.08353	-0.04736	-0.0038	0.00931	-0.11472	-0.13426	0.0923	0.22271	0.0552	-0.06085	0.0735	0.18321	0.17263	0.05459	-0.0743	-0.09858	-0.05816	-0.03541	0.0143	0.16232	0.25175	0.21	0.2264	0.3127	0.29093	0.142	-0.02388	-0.10963	-0.09309	0.00998	0.1673	0.3092	0.35844	0.30055	0.23196
0.0291	-0.03612	-0.0994	-0.06807	0.10466	0.13995	0.04332	0.02941	-0.00387	-0.06045	-0.04319	-0.14632	-0.27328	-0.19809	-0.11079	-0.08027	-0.04695	-0.00287	0.01124	-0.11311	-0.13096	0.09477	0.22159	0.05361	-0.06092	0.07455	0.18411	0.17223	0.05203	-0.07826	-0.10558	-0.06833	-0.04018	0.01511	0.15971	0.243	0.20106	0.21915	0.30294	0.28031	0.13562	-0.02471	-0.10606	-0.08921	0.01384	0.17291	0.31412	0.36222	0.30601	0.2392
0.02934	-0.03721	-0.10072	-0.06843	0.10224	0.13099	0.029	0.01753	-0.00706	-0.05669	-0.03806	-0.14112	-0.26765	-0.19313	-0.10606	-0.07685	-0.04622	-0.00191	0.01286	-0.11161	-0.12722	0.09785	0.22084	0.05223	-0.06087	0.07548	0.18469	0.17135	0.04904	-0.08229	-0.11215	-0.07791	-0.04455	0.01629	0.1574	0.2344	0.19234	0.21214	0.29338	0.26986	0.12906	-0.02596	-0.10254	-0.08494	0.01814	0.17877	0.31907	0.36585	0.31132	0.24641
0.02958	-0.03832	-0.10212	-0.06908	0.09925	0.12149	0.0143	0.00537	-0.01027	-0.05258	-0.03255	-0.13557	-0.26178	-0.18839	-0.10161	-0.07329	-0.0452	-0.000979007	0.01412	-0.11027	-0.1231	0.10152	0.22046	0.05106	-0.0607	0.07628	0.18493	0.16996	0.04562	-0.0864	-0.1183	-0.08688	-0.04853	0.0178	0.15537	0.22595	0.18384	0.20539	0.28409	0.25966	0.12235	-0.02761	-0.09908	-0.08029	0.02283	0.18483	0.32403	0.36932	0.31645	0.25357
0.02983	-0.03944	-0.10358	-0.07002	0.09571	0.11148	-0.00071993	-0.00703	-0.01351	-0.04812	-0.02668	-0.12969	-0.25568	-0.18388	-0.09746	-0.06962	-0.04395	-0.00014221	0.01496	-0.10912	-0.11862	0.10576	0.22043	0.05008	-0.06043	0.07693	0.18482	0.16807	0.04174	-0.09063	-0.12405	-0.09524	-0.05212	0.01961	0.15359	0.21764	0.17556	0.19896	0.27514	0.24976	0.11552	-0.02967	-0.09568	-0.07526	0.02789	0.19103	0.32896	0.3726	0.32138	0.26069
0.03007	-0.04054	-0.10507	-0.07122	0.09163	0.10102	-0.01599	-0.01963	-0.01678	-0.04337	-0.02049	-0.1235	-0.24936	-0.17961	-0.09362	-0.06587	-0.04249	0.000547845	0.01533	-0.1082	-0.11384	0.1105	0.22073	0.04927	-0.06009	0.07742	0.18434	0.16564	0.0374	-0.09499	-0.12942	-0.10297	-0.05533	0.02168	0.15202	0.20944	0.1675	0.19289	0.26662	0.24022	0.1086	-0.03212	-0.09234	-0.06988	0.03328	0.1973	0.33382	0.37568	0.32611	0.26778
0.03031	-0.04163	-0.10657	-0.07267	0.08703	0.09015	-0.03145	-0.03239	-0.02006	-0.03833	-0.01401	-0.11703	-0.24284	-0.17558	-0.09009	-0.06206	-0.04088	0.00104	0.0152	-0.10754	-0.10879	0.11572	0.22133	0.04861	-0.05969	0.07773	0.18349	0.16267	0.03259	-0.09951	-0.13441	-0.11008	-0.05817	0.02397	0.15064	0.20136	0.15966	0.18721	0.25857	0.23109	0.10161	-0.03494	-0.08906	-0.06413	0.03896	0.20358	0.33858	0.37853	0.33061	0.27483
0.03055	-0.04269	-0.10807	-0.07436	0.08192	0.07891	-0.04703	-0.04526	-0.02335	-0.03304	-0.00727	-0.11032	-0.23613	-0.17178	-0.0869	-0.05823	-0.03916	0.00128	0.01454	-0.10715	-0.10351	0.12136	0.2222	0.04808	-0.05925	0.07785	0.18225	0.15916	0.02732	-0.10419	-0.13905	-0.11656	-0.06065	0.02645	0.14941	0.19337	0.15205	0.18195	0.25107	0.22241	0.09459	-0.03813	-0.08584	-0.05804	0.0449	0.20983	0.34321	0.38114	0.33486	0.28184
0.0308	-0.0437	-0.10952	-0.07625	0.07635	0.06738	-0.06266	-0.05819	-0.02664	-0.02753	-0.000312947	-0.10339	-0.22925	-0.16822	-0.08404	-0.05439	-0.03737	0.00123	0.01332	-0.10704	-0.09805	0.12736	0.22327	0.04764	-0.05879	0.07779	0.18063	0.15512	0.02159	-0.10904	-0.14335	-0.12242	-0.06279	0.02909	0.14831	0.18546	0.14465	0.17714	0.24416	0.21423	0.08756	-0.04165	-0.08265	-0.05159	0.05107	0.216	0.34767	0.38349	0.33886	0.28882
0.03104	-0.04466	-0.11091	-0.07832	0.07032	0.05562	-0.07825	-0.07112	-0.02993	-0.02182	0.00683	-0.09626	-0.2222	-0.1649	-0.08152	-0.05056	-0.03553	0.000855294	0.01153	-0.10723	-0.09244	0.13367	0.22453	0.04728	-0.05833	0.07753	0.17862	0.15053	0.0154	-0.11408	-0.14733	-0.12767	-0.06459	0.03186	0.14729	0.17761	0.13747	0.17282	0.23788	0.2066	0.08057	-0.04548	-0.07951	-0.04481	0.05744	0.22202	0.35193	0.38555	0.34257	0.29576
0.03128	-0.04554	-0.11221	-0.08055	0.0639	0.04368	-0.09374	-0.08399	-0.03319	-0.01594	0.01411	-0.08898	-0.21502	-0.16181	-0.07934	-0.04677	-0.03369	0.000119043	0.00918	-0.1077	-0.08671	0.14021	0.22589	0.04695	-0.05788	0.07708	0.17624	0.14542	0.00878	-0.11928	-0.151	-0.13231	-0.06605	0.03473	0.14633	0.1698	0.1305	0.16899	0.23228	0.19953	0.07363	-0.04958	-0.07638	-0.03769	0.06397	0.22785	0.35596	0.38732	0.34599	0.30265
0.03152	-0.04634	-0.1134	-0.0829	0.0571	0.03164	-0.10903	-0.09676	-0.03641	-0.00993	0.02149	-0.08158	-0.20772	-0.15895	-0.07749	-0.04302	-0.03187	-0.001	0.00627	-0.10843	-0.08091	0.14692	0.22732	0.04662	-0.05746	0.07644	0.17348	0.13981	0.00174	-0.12466	-0.15437	-0.13636	-0.06721	0.03768	0.14539	0.16201	0.12374	0.16568	0.22738	0.19307	0.0668	-0.05393	-0.07326	-0.03025	0.07063	0.23346	0.35973	0.38876	0.3491	0.30949
0.03177	-0.04704	-0.11444	-0.08535	0.04999	0.01958	-0.12405	-0.10936	-0.03957	-0.0038	0.02893	-0.07408	-0.20032	-0.15632	-0.07599	-0.03934	-0.03011	-0.00253	0.00283	-0.10942	-0.07506	0.15372	0.22874	0.04625	-0.05709	0.07561	0.17037	0.13371	-0.0057	-0.1302	-0.15745	-0.13983	-0.06805	0.04067	0.14445	0.15423	0.11719	0.1629	0.22321	0.18723	0.06009	-0.05848	-0.07012	-0.0225	0.07741	0.23881	0.36322	0.38986	0.35189	0.31627
0.03201	-0.04764	-0.11532	-0.08786	0.0426	0.00755	-0.13871	-0.12173	-0.04267	0.00241	0.03639	-0.06653	-0.19284	-0.15391	-0.07481	-0.03573	-0.02843	-0.00447	-0.00112	-0.11062	-0.06919	0.16054	0.23009	0.04581	-0.05677	0.0746	0.16693	0.12716	-0.01349	-0.13588	-0.16026	-0.14275	-0.0686	0.04371	0.14347	0.14644	0.11084	0.16066	0.21979	0.18204	0.05355	-0.0632	-0.06697	-0.01444	0.08426	0.24386	0.3664	0.39061	0.35435	0.32299
0.03225	-0.04812	-0.11602	-0.09039	0.03498	-0.00437	-0.15294	-0.13382	-0.04568	0.00867	0.04381	-0.05896	-0.1853	-0.15172	-0.07395	-0.03219	-0.02684	-0.00682	-0.00553	-0.112	-0.06334	0.16731	0.23132	0.04526	-0.05652	0.07342	0.16316	0.12019	-0.0216	-0.14167	-0.16279	-0.14513	-0.06887	0.04675	0.14242	0.13862	0.1047	0.15896	0.21712	0.17751	0.0472	-0.06805	-0.06378	-0.0061	0.09117	0.2486	0.36926	0.39101	0.35647	0.32964
0.03249	-0.04847	-0.1165	-0.09293	0.02719	-0.01609	-0.16665	-0.14556	-0.04857	0.01495	0.05115	-0.05141	-0.17773	-0.14974	-0.07341	-0.02873	-0.02536	-0.0096	-0.01036	-0.11352	-0.05753	0.17395	0.23236	0.04457	-0.05635	0.07207	0.15909	0.11283	-0.02999	-0.14756	-0.16507	-0.14699	-0.06888	0.04979	0.14127	0.13077	0.09876	0.1578	0.21521	0.17366	0.04109	-0.07298	-0.06055	0.00251	0.09811	0.253	0.37179	0.39105	0.35824	0.3362
0.03274	-0.04869	-0.11676	-0.09543	0.01927	-0.02757	-0.17978	-0.1569	-0.05135	0.02122	0.05837	-0.04391	-0.17015	-0.14797	-0.07315	-0.02536	-0.02401	-0.01278	-0.01555	-0.11513	-0.05179	0.1804	0.23314	0.0437	-0.05626	0.07057	0.15474	0.10513	-0.03862	-0.15351	-0.16709	-0.14837	-0.06863	0.05281	0.14	0.12286	0.09302	0.15718	0.21404	0.17049	0.03523	-0.07797	-0.05726	0.01137	0.10506	0.25706	0.37398	0.39072	0.35968	0.34267
0.03298	-0.04876	-0.11679	-0.09787	0.01128	-0.03874	-0.19225	-0.16778	-0.05398	0.02745	0.06543	-0.0365	-0.16258	-0.14639	-0.07318	-0.02207	-0.02279	-0.01635	-0.02104	-0.11678	-0.04613	0.18659	0.23361	0.04262	-0.05628	0.06893	0.15014	0.09713	-0.04743	-0.15949	-0.16885	-0.14928	-0.06814	0.05579	0.13859	0.1149	0.08748	0.15707	0.2136	0.16799	0.02966	-0.08297	-0.0539	0.02046	0.11201	0.26078	0.37584	0.39003	0.36077	0.34904
0.03322	-0.04869	-0.11655	-0.10023	0.00325	-0.04952	-0.204	-0.17815	-0.05644	0.0336	0.07226	-0.02923	-0.15506	-0.14501	-0.07347	-0.01885	-0.0217	-0.0203	-0.02678	-0.11843	-0.04057	0.19244	0.23372	0.0413	-0.0564	0.06715	0.14532	0.08887	-0.05637	-0.16545	-0.17035	-0.14974	-0.06743	0.05872	0.13702	0.10688	0.08214	0.15747	0.21387	0.16616	0.0244	-0.08795	-0.05047	0.02976	0.11893	0.26414	0.37737	0.389	0.36152	0.3553
0.03346	-0.04846	-0.11605	-0.10246	-0.00475	-0.05987	-0.21497	-0.18795	-0.05872	0.03965	0.07883	-0.02213	-0.14761	-0.14382	-0.07399	-0.01571	-0.02075	-0.02459	-0.0327	-0.12002	-0.03513	0.19792	0.23342	0.03971	-0.05664	0.06526	0.14029	0.08041	-0.06538	-0.17135	-0.17161	-0.1498	-0.06651	0.0616	0.13526	0.09879	0.07699	0.15834	0.2148	0.16498	0.01947	-0.09286	-0.04696	0.03925	0.12582	0.26718	0.37858	0.38762	0.36195	0.36143
0.03371	-0.04808	-0.11527	-0.10456	-0.01268	-0.06974	-0.22512	-0.19713	-0.06081	0.04555	0.08509	-0.01524	-0.14026	-0.14279	-0.07474	-0.01263	-0.01993	-0.02919	-0.03872	-0.12149	-0.02982	0.20297	0.23266	0.03783	-0.05699	0.06326	0.13509	0.07178	-0.07442	-0.17717	-0.17261	-0.14947	-0.06539	0.06442	0.13331	0.09064	0.07203	0.15965	0.21636	0.16443	0.01489	-0.09768	-0.04337	0.04889	0.13267	0.2699	0.37948	0.38592	0.36205	0.36741
0.03395	-0.04753	-0.11421	-0.10649	-0.02051	-0.07908	-0.23438	-0.20565	-0.06268	0.05128	0.09099	-0.00861	-0.13304	-0.14194	-0.07567	-0.0096	-0.01924	-0.03406	-0.04478	-0.1228	-0.02465	0.20753	0.23141	0.03564	-0.05745	0.06118	0.12975	0.06305	-0.08343	-0.18284	-0.17336	-0.14879	-0.06409	0.06717	0.13116	0.08242	0.06726	0.16136	0.21851	0.16449	0.01068	-0.10237	-0.03968	0.05866	0.13947	0.27233	0.3801	0.3839	0.36184	0.37324
0.03419	-0.04682	-0.11285	-0.10824	-0.02819	-0.08784	-0.24272	-0.21346	-0.06432	0.05679	0.09649	-0.00228	-0.12598	-0.14123	-0.07678	-0.00663	-0.01867	-0.03917	-0.0508	-0.1239	-0.01964	0.21159	0.22966	0.03313	-0.05803	0.05902	0.1243	0.05426	-0.09235	-0.18835	-0.17386	-0.14779	-0.06262	0.06986	0.12882	0.07415	0.06268	0.16344	0.22117	0.16512	0.00685	-0.10689	-0.03591	0.06854	0.14621	0.27449	0.38046	0.3816	0.36132	0.37888
0.03443	-0.04594	-0.11119	-0.10978	-0.03568	-0.09601	-0.2501	-0.22053	-0.06573	0.06205	0.10155	0.00372	-0.11911	-0.14068	-0.07803	-0.0037	-0.0182	-0.04448	-0.05674	-0.12475	-0.01478	0.2151	0.22738	0.03029	-0.05872	0.05681	0.11876	0.04546	-0.10113	-0.19363	-0.17412	-0.14649	-0.061	0.0725	0.12627	0.06583	0.05828	0.16583	0.2243	0.16629	0.00341	-0.11122	-0.03204	0.07849	0.15289	0.27642	0.38057	0.37901	0.36051	0.38433
0.03468	-0.0449	-0.10923	-0.1111	-0.04295	-0.10353	-0.2565	-0.22682	-0.06689	0.06703	0.10611	0.00936	-0.11245	-0.14025	-0.07941	-0.000813361	-0.01784	-0.04992	-0.0625	-0.12532	-0.0101	0.21806	0.22456	0.02713	-0.05952	0.05457	0.11317	0.0367	-0.10971	-0.19866	-0.17413	-0.14494	-0.05923	0.07508	0.12354	0.05748	0.05406	0.16848	0.22782	0.16796	0.000375885	-0.11531	-0.02809	0.08847	0.15949	0.27814	0.38047	0.37617	0.35942	0.38955
0.03492	-0.04369	-0.10697	-0.11218	-0.04998	-0.1104	-0.26189	-0.2323	-0.0678	0.07168	0.11015	0.0146	-0.10603	-0.13995	-0.08088	0.00204	-0.01755	-0.05547	-0.06805	-0.12556	-0.00559	0.22044	0.22121	0.02364	-0.06041	0.05231	0.10756	0.02802	-0.11804	-0.2034	-0.17391	-0.14316	-0.05734	0.07762	0.12062	0.04911	0.05001	0.17135	0.23165	0.17008	-0.00226	-0.11916	-0.02405	0.09845	0.16601	0.27968	0.38017	0.37309	0.35805	0.39452
0.03516	-0.04232	-0.10441	-0.11302	-0.05672	-0.1166	-0.26626	-0.23693	-0.06845	0.07597	0.11364	0.01942	-0.09987	-0.13977	-0.08243	0.00487	-0.01735	-0.06108	-0.07333	-0.12547	-0.00127	0.22225	0.21735	0.01986	-0.06137	0.05006	0.10196	0.01948	-0.12606	-0.2078	-0.17345	-0.14119	-0.05534	0.08011	0.11754	0.04075	0.04614	0.17438	0.23574	0.1726	-0.00449	-0.12273	-0.01995	0.10838	0.17243	0.28109	0.3797	0.36978	0.35641	0.39923
0.0354	-0.04079	-0.10156	-0.1136	-0.06317	-0.12211	-0.2696	-0.2407	-0.06886	0.07985	0.11653	0.02379	-0.09399	-0.13969	-0.08403	0.00767	-0.0172	-0.06668	-0.07828	-0.12503	0.00285	0.22349	0.21299	0.01578	-0.0624	0.04784	0.0964	0.01112	-0.13373	-0.21183	-0.17277	-0.13906	-0.05325	0.08257	0.1143	0.03241	0.04244	0.17751	0.23999	0.17546	-0.00633	-0.12601	-0.01579	0.11822	0.17876	0.2824	0.37909	0.36626	0.35452	0.40364
0.03565	-0.03909	-0.09841	-0.11391	-0.0693	-0.12695	-0.27192	-0.24359	-0.06901	0.0833	0.1188	0.02769	-0.08841	-0.13971	-0.08566	0.01045	-0.01709	-0.07225	-0.08288	-0.12423	0.00678	0.22417	0.20817	0.01145	-0.06347	0.04567	0.09092	0.00298	-0.14101	-0.21545	-0.17186	-0.13682	-0.0511	0.08498	0.11092	0.02412	0.03893	0.18068	0.24434	0.17863	-0.00777	-0.12898	-0.01159	0.12792	0.18496	0.28363	0.37836	0.36256	0.35237	0.40774
0.03589	-0.03724	-0.09498	-0.11396	-0.07509	-0.13111	-0.27321	-0.24559	-0.06892	0.08628	0.12043	0.0311	-0.08315	-0.13981	-0.08731	0.0132	-0.01701	-0.07773	-0.08709	-0.12307	0.01049	0.22431	0.20293	0.0069	-0.06456	0.04358	0.08552	-0.0049	-0.14784	-0.21863	-0.17073	-0.13449	-0.0489	0.08736	0.10743	0.01592	0.03559	0.18383	0.24869	0.18203	-0.00882	-0.13163	-0.00738	0.13743	0.19105	0.28483	0.37753	0.35868	0.34999	0.4115
0.03613	-0.03525	-0.09128	-0.11373	-0.08054	-0.1346	-0.2735	-0.24669	-0.0686	0.08874	0.1214	0.03401	-0.07822	-0.13998	-0.08895	0.01593	-0.01695	-0.08308	-0.09088	-0.12157	0.01398	0.22394	0.19731	0.00217	-0.06565	0.04158	0.08024	-0.0125	-0.15418	-0.22133	-0.1694	-0.13211	-0.04669	0.0897	0.10385	0.00784	0.03242	0.18691	0.25297	0.18562	-0.0095	-0.13395	-0.00318	0.1467	0.19699	0.28602	0.37663	0.35464	0.34737	0.41491
0.03637	-0.03311	-0.08732	-0.11324	-0.08563	-0.13745	-0.27281	-0.2469	-0.06806	0.09065	0.12167	0.0364	-0.07363	-0.14022	-0.09056	0.01863	-0.01689	-0.08826	-0.09424	-0.11975	0.01725	0.22308	0.19138	-0.0027	-0.0667	0.0397	0.07511	-0.01979	-0.16002	-0.22354	-0.16787	-0.12971	-0.04448	0.092	0.1002	-9.5728e-05	0.02945	0.18986	0.25711	0.18934	-0.00982	-0.13593	0.000989848	0.15568	0.20279	0.28724	0.37568	0.35045	0.34453	0.41793
0.03661	-0.03084	-0.08311	-0.11248	-0.09037	-0.13967	-0.27117	-0.24622	-0.06732	0.09199	0.12125	0.03828	-0.0694	-0.14051	-0.09213	0.0213	-0.01682	-0.09323	-0.09718	-0.11763	0.02028	0.22179	0.1852	-0.00764	-0.06768	0.03796	0.07013	-0.02674	-0.16531	-0.22524	-0.16616	-0.12734	-0.0423	0.09425	0.0965	-0.00784	0.02666	0.19263	0.26102	0.19313	-0.00981	-0.13758	0.00509	0.16431	0.20842	0.28852	0.3747	0.34613	0.34146	0.42055
0.03686	-0.02844	-0.07867	-0.11147	-0.09474	-0.14129	-0.2686	-0.24466	-0.06639	0.09271	0.12012	0.03963	-0.06551	-0.14083	-0.09364	0.02393	-0.01672	-0.09795	-0.09967	-0.11524	0.02308	0.2201	0.17884	-0.0126	-0.06857	0.03639	0.06533	-0.03334	-0.17003	-0.2264	-0.16427	-0.12502	-0.04017	0.09645	0.09279	-0.01536	0.02406	0.19515	0.26464	0.19693	-0.00946	-0.1389	0.00911	0.17256	0.21387	0.28988	0.3737	0.34167	0.33816	0.42275
0.0371	-0.02593	-0.07403	-0.1102	-0.09877	-0.14234	-0.26516	-0.24224	-0.0653	0.09279	0.11827	0.04046	-0.06198	-0.14117	-0.09507	0.02651	-0.01658	-0.10238	-0.10173	-0.11262	0.02563	0.21805	0.17238	-0.01751	-0.06932	0.035	0.06073	-0.03957	-0.17418	-0.22701	-0.16223	-0.12279	-0.03813	0.0986	0.08909	-0.02261	0.02165	0.19739	0.26791	0.2007	-0.00882	-0.13989	0.013	0.18036	0.21913	0.29134	0.3727	0.33709	0.33464	0.4245
0.03734	-0.02331	-0.06919	-0.1087	-0.10244	-0.14286	-0.26088	-0.23899	-0.06407	0.09222	0.11572	0.04079	-0.05879	-0.14151	-0.0964	0.02904	-0.01639	-0.10651	-0.10339	-0.10982	0.02794	0.21572	0.1659	-0.0223	-0.06989	0.03384	0.05634	-0.04542	-0.17773	-0.22708	-0.16006	-0.12069	-0.03619	0.10069	0.08543	-0.02955	0.01944	0.19931	0.27076	0.20438	-0.0079	-0.14056	0.01674	0.18768	0.22418	0.29291	0.3717	0.33239	0.33087	0.42579
0.03758	-0.02061	-0.06419	-0.10697	-0.10576	-0.14288	-0.25581	-0.23492	-0.06272	0.09096	0.11245	0.04062	-0.05594	-0.14184	-0.09763	0.0315	-0.01614	-0.11029	-0.10465	-0.10689	0.03	0.21314	0.15948	-0.02689	-0.07024	0.03291	0.05219	-0.05087	-0.18068	-0.2266	-0.15777	-0.11874	-0.03438	0.10271	0.08185	-0.03616	0.01744	0.20086	0.27314	0.20793	-0.00671	-0.14091	0.02031	0.19447	0.22902	0.29461	0.3707	0.32756	0.32686	0.42659
0.03783	-0.01782	-0.05904	-0.10503	-0.10876	-0.14245	-0.25	-0.23006	-0.06127	0.08903	0.1085	0.03998	-0.05341	-0.14213	-0.09874	0.0339	-0.01581	-0.1137	-0.10555	-0.10387	0.03181	0.21039	0.1532	-0.0312	-0.07032	0.03225	0.04829	-0.05593	-0.18303	-0.22559	-0.1554	-0.11699	-0.03273	0.10466	0.07836	-0.04239	0.01564	0.202	0.27501	0.2113	-0.00529	-0.14096	0.02367	0.2007	0.23361	0.29644	0.3697	0.32258	0.32259	0.4269
0.03807	-0.01496	-0.05378	-0.1029	-0.11143	-0.1416	-0.2435	-0.22446	-0.05974	0.0864	0.10389	0.03889	-0.05119	-0.14238	-0.09971	0.03622	-0.01539	-0.11674	-0.10613	-0.10082	0.03337	0.2075	0.14716	-0.03515	-0.07009	0.03187	0.04466	-0.06058	-0.18477	-0.22404	-0.15296	-0.11545	-0.03126	0.10653	0.07499	-0.04821	0.01404	0.20272	0.27632	0.21446	-0.00366	-0.14071	0.0268	0.20632	0.23795	0.2984	0.36869	0.31746	0.31803	0.42667
0.03831	-0.01205	-0.04842	-0.10059	-0.11381	-0.14039	-0.23638	-0.21814	-0.05816	0.0831	0.09865	0.03739	-0.04925	-0.14255	-0.10054	0.03845	-0.01489	-0.11938	-0.10641	-0.0978	0.03468	0.20454	0.14143	-0.03866	-0.06949	0.03182	0.04131	-0.06482	-0.18592	-0.22199	-0.1505	-0.11416	-0.02999	0.1083	0.07176	-0.0536	0.01265	0.20297	0.27705	0.21737	-0.00184	-0.14018	0.02967	0.2113	0.24202	0.30048	0.36767	0.31218	0.31318	0.42591
0.03855	-0.00911	-0.043	-0.09812	-0.1159	-0.13886	-0.22869	-0.21116	-0.05653	0.07912	0.09281	0.03552	-0.04758	-0.14265	-0.10122	0.04059	-0.01428	-0.12161	-0.10645	-0.09487	0.03575	0.20156	0.13609	-0.04166	-0.0685	0.0321	0.03826	-0.06865	-0.18648	-0.21944	-0.14803	-0.11315	-0.02894	0.10995	0.0687	-0.05853	0.01145	0.20275	0.27718	0.22001	0.000156756	-0.13939	0.03228	0.21563	0.2458	0.30267	0.36661	0.30672	0.308	0.42459
0.0388	-0.00614	-0.03754	-0.09552	-0.11772	-0.13706	-0.2205	-0.20354	-0.05487	0.07451	0.08643	0.0333	-0.04615	-0.14267	-0.10174	0.04263	-0.01357	-0.12343	-0.1063	-0.09207	0.03656	0.19862	0.13122	-0.04407	-0.06705	0.03274	0.03552	-0.07207	-0.18649	-0.21645	-0.14558	-0.11244	-0.02815	0.11148	0.06581	-0.06297	0.01044	0.20203	0.27669	0.22234	0.0023	-0.13834	0.03458	0.21926	0.24927	0.30496	0.3655	0.30105	0.30248	0.4227
0.03904	-0.00316	-0.03208	-0.09282	-0.11929	-0.13504	-0.21186	-0.19535	-0.05321	0.06928	0.07955	0.0308	-0.04495	-0.14259	-0.10209	0.04457	-0.01274	-0.12484	-0.10599	-0.08947	0.03713	0.19575	0.12689	-0.04581	-0.06512	0.03375	0.0331	-0.07508	-0.18594	-0.21302	-0.14319	-0.11206	-0.02763	0.11287	0.06311	-0.06692	0.00962	0.20081	0.27557	0.22434	0.00456	-0.13705	0.03658	0.22219	0.25242	0.30733	0.36431	0.29517	0.2966	0.42023
0.03928	-0.000201352	-0.02664	-0.09002	-0.12063	-0.13284	-0.20285	-0.18663	-0.05154	0.06347	0.07223	0.02805	-0.04396	-0.14242	-0.10227	0.0464	-0.01179	-0.12584	-0.10557	-0.08711	0.03746	0.193	0.12314	-0.04681	-0.06266	0.03515	0.03102	-0.07769	-0.18488	-0.20921	-0.14089	-0.11202	-0.0274	0.11409	0.06061	-0.07036	0.00897	0.19907	0.27382	0.22601	0.00693	-0.13553	0.03824	0.2244	0.25523	0.30974	0.36302	0.28905	0.29032	0.41716
0.03952	0.00273	-0.02126	-0.08715	-0.12178	-0.13051	-0.19353	-0.17743	-0.04989	0.05713	0.06453	0.02511	-0.04314	-0.14214	-0.10227	0.04812	-0.01072	-0.12644	-0.1051	-0.08504	0.03756	0.19041	0.12005	-0.04703	-0.05965	0.03695	0.02927	-0.07991	-0.18334	-0.20505	-0.13871	-0.11235	-0.02749	0.11513	0.05831	-0.07328	0.00848	0.19684	0.27146	0.22733	0.00938	-0.13381	0.03956	0.22587	0.25769	0.31218	0.36161	0.28266	0.28364	0.41349
0.03977	0.00562	-0.01597	-0.08425	-0.12274	-0.12811	-0.18395	-0.16781	-0.04826	0.0503	0.05652	0.02203	-0.04247	-0.14176	-0.1021	0.04974	-0.00952	-0.12664	-0.10462	-0.0833	0.03744	0.188	0.11766	-0.04638	-0.05605	0.03916	0.02786	-0.08175	-0.18134	-0.20059	-0.13668	-0.11306	-0.0279	0.11597	0.05623	-0.07567	0.00814	0.1941	0.2685	0.22829	0.0119	-0.1319	0.04054	0.22661	0.25979	0.31462	0.36003	0.27599	0.27653	0.40921
0.04001	0.00844	-0.01081	-0.08134	-0.12354	-0.12567	-0.1742	-0.15783	-0.04665	0.04305	0.04826	0.01886	-0.04194	-0.14126	-0.10175	0.05125	-0.00817	-0.12645	-0.10416	-0.08193	0.0371	0.18581	0.11599	-0.04485	-0.05183	0.04178	0.02681	-0.08321	-0.17892	-0.19588	-0.13483	-0.11417	-0.02865	0.11659	0.05437	-0.07754	0.00794	0.19088	0.26497	0.22889	0.01447	-0.12981	0.04116	0.22661	0.2615	0.317	0.35827	0.26902	0.26897	0.40431
0.04025	0.01117	-0.0058	-0.07843	-0.12422	-0.12325	-0.16434	-0.14755	-0.04507	0.03544	0.03983	0.01565	-0.0415	-0.14065	-0.10122	0.05267	-0.00669	-0.12588	-0.10377	-0.08094	0.03655	0.18386	0.11509	-0.04237	-0.04698	0.04482	0.0261	-0.0843	-0.17612	-0.19097	-0.1332	-0.11569	-0.02977	0.11699	0.05272	-0.0789	0.00787	0.18719	0.26089	0.22913	0.01706	-0.12756	0.04143	0.22589	0.26282	0.3193	0.35628	0.26173	0.26095	0.39879
0.04049	0.01379	-0.000991196	-0.07557	-0.12479	-0.12089	-0.15442	-0.13703	-0.04352	0.02753	0.03131	0.01247	-0.04115	-0.13993	-0.10049	0.054	-0.00506	-0.12495	-0.10347	-0.08036	0.03582	0.18216	0.11497	-0.03893	-0.04148	0.04827	0.02576	-0.08503	-0.17297	-0.18591	-0.13182	-0.11764	-0.03124	0.11714	0.05129	-0.07975	0.0079	0.18306	0.25629	0.22901	0.01966	-0.12516	0.04134	0.22445	0.26374	0.32148	0.35403	0.2541	0.25245	0.39265
0.04074	0.01629	0.00359	-0.07278	-0.12529	-0.11864	-0.14453	-0.12632	-0.042	0.01939	0.02276	0.00936	-0.04084	-0.13909	-0.09958	0.05524	-0.00328	-0.12367	-0.1033	-0.08021	0.03491	0.18073	0.11564	-0.03449	-0.03534	0.05212	0.02576	-0.0854	-0.16951	-0.18075	-0.13072	-0.12003	-0.0331	0.11704	0.05007	-0.08011	0.00802	0.17851	0.25123	0.22853	0.02226	-0.12262	0.04091	0.22233	0.26425	0.32349	0.35148	0.24612	0.24346	0.38587
0.04098	0.01864	0.00792	-0.07009	-0.12574	-0.11655	-0.13472	-0.1155	-0.04052	0.0111	0.01428	0.00637	-0.04055	-0.13813	-0.09848	0.05643	-0.00135	-0.12206	-0.10328	-0.08049	0.03383	0.17957	0.11709	-0.02907	-0.02856	0.05636	0.02611	-0.08543	-0.16577	-0.17555	-0.12994	-0.12286	-0.03532	0.11668	0.04905	-0.07999	0.00822	0.17358	0.24574	0.22772	0.02483	-0.11996	0.04014	0.21953	0.26435	0.32529	0.3486	0.23777	0.23399	0.37847
0.04122	0.02083	0.01194	-0.06753	-0.12618	-0.11465	-0.12505	-0.10463	-0.03907	0.00273	0.00592	0.00357	-0.04027	-0.13705	-0.0972	0.05755	0.000738997	-0.12014	-0.10343	-0.08119	0.03262	0.17868	0.11933	-0.02265	-0.02114	0.06097	0.02681	-0.08512	-0.16179	-0.17037	-0.12951	-0.12615	-0.03793	0.11605	0.04824	-0.07943	0.00847	0.16829	0.23986	0.22656	0.02737	-0.11719	0.03905	0.21609	0.26404	0.32685	0.34537	0.22905	0.22403	0.37045
0.04146	0.02283	0.01564	-0.06514	-0.12663	-0.11298	-0.11558	-0.09375	-0.03764	-0.00563	-0.00222	0.000990219	-0.03995	-0.13586	-0.09572	0.05862	0.00298	-0.11794	-0.10378	-0.08232	0.03128	0.17807	0.12233	-0.01526	-0.01312	0.06591	0.02784	-0.08447	-0.1576	-0.16524	-0.12946	-0.1299	-0.04091	0.11516	0.04762	-0.07844	0.00875	0.16269	0.23366	0.22509	0.02987	-0.11431	0.03765	0.21206	0.26332	0.32813	0.34175	0.21997	0.21358	0.36182
0.04171	0.02464	0.01897	-0.06294	-0.12713	-0.11158	-0.10638	-0.08295	-0.03623	-0.01391	-0.01007	-0.00131	-0.03959	-0.13456	-0.09406	0.05966	0.00536	-0.11549	-0.10433	-0.08385	0.02985	0.17772	0.12606	-0.00693	-0.00452	0.07115	0.02918	-0.08349	-0.15323	-0.16023	-0.12981	-0.1341	-0.04425	0.114	0.04717	-0.07707	0.00906	0.15682	0.22718	0.22331	0.03231	-0.11134	0.03597	0.20745	0.26221	0.32909	0.33773	0.21052	0.20266	0.35258
0.04195	0.02623	0.02192	-0.06096	-0.12771	-0.1105	-0.09749	-0.07227	-0.03485	-0.02203	-0.01756	-0.00328	-0.03915	-0.13314	-0.09223	0.06067	0.00788	-0.11281	-0.10509	-0.08577	0.02836	0.17764	0.13048	0.00231	0.00462	0.07666	0.03082	-0.08219	-0.14872	-0.15539	-0.13059	-0.13876	-0.04796	0.11257	0.0469	-0.07533	0.00936	0.15073	0.22047	0.22123	0.03468	-0.10828	0.03402	0.20233	0.26071	0.32972	0.33329	0.20072	0.19128	0.34275
0.04219	0.02759	0.02445	-0.05924	-0.12838	-0.10975	-0.08897	-0.06177	-0.03347	-0.02992	-0.02462	-0.00489	-0.03862	-0.13162	-0.09022	0.06167	0.01052	-0.10993	-0.10607	-0.08804	0.02682	0.17781	0.13555	0.01241	0.01425	0.08239	0.03275	-0.08057	-0.14409	-0.15075	-0.13183	-0.14387	-0.052	0.11089	0.04679	-0.07327	0.00966	0.14445	0.2136	0.21889	0.03699	-0.10513	0.03184	0.19674	0.25883	0.32998	0.32842	0.19058	0.17947	0.33234
0.04243	0.0287	0.02653	-0.05779	-0.12919	-0.10937	-0.08086	-0.0515	-0.0321	-0.03751	-0.03119	-0.0061	-0.03798	-0.13	-0.08804	0.06265	0.01328	-0.1069	-0.10726	-0.09063	0.02526	0.17823	0.14121	0.02329	0.02431	0.0883	0.03494	-0.07863	-0.13937	-0.14636	-0.13352	-0.14941	-0.05638	0.10897	0.04681	-0.07093	0.00992	0.13805	0.20662	0.21629	0.03921	-0.10189	0.02946	0.19072	0.25659	0.32986	0.32312	0.18012	0.16726	0.32137
0.04268	0.02956	0.02815	-0.05664	-0.13014	-0.10938	-0.07321	-0.04152	-0.03073	-0.04471	-0.03719	-0.00688	-0.03722	-0.12829	-0.08571	0.06363	0.01613	-0.10375	-0.10866	-0.0935	0.02373	0.17888	0.14742	0.0349	0.03475	0.09433	0.03737	-0.07638	-0.13458	-0.14226	-0.13569	-0.15538	-0.06107	0.10681	0.04697	-0.06834	0.01015	0.13156	0.19958	0.21345	0.04136	-0.09857	0.0269	0.18434	0.25401	0.32933	0.31737	0.16937	0.15466	0.30986
0.04292	0.03015	0.0293	-0.0558	-0.13126	-0.10979	-0.06605	-0.03188	-0.02934	-0.05146	-0.04257	-0.00719	-0.03632	-0.12648	-0.08323	0.06462	0.01905	-0.1005	-0.11026	-0.09661	0.02225	0.17974	0.15411	0.04716	0.0455	0.10042	0.04003	-0.07383	-0.12973	-0.13846	-0.13834	-0.16176	-0.06605	0.10444	0.04725	-0.06554	0.01032	0.12505	0.19253	0.2104	0.04342	-0.09517	0.0242	0.17764	0.25111	0.32838	0.31118	0.15835	0.14173	0.29783
0.04316	0.03047	0.02995	-0.0553	-0.13255	-0.11061	-0.05941	-0.0226	-0.02793	-0.0577	-0.04729	-0.00701	-0.03527	-0.12459	-0.08062	0.0656	0.02203	-0.09721	-0.11204	-0.09991	0.02086	0.1808	0.1612	0.05998	0.05648	0.10653	0.04288	-0.07096	-0.12483	-0.13499	-0.14146	-0.16852	-0.07129	0.10186	0.04764	-0.06256	0.01045	0.11855	0.18553	0.20715	0.0454	-0.09169	0.0214	0.17068	0.24791	0.327	0.30455	0.1471	0.1285	0.28531
0.0434	0.03051	0.03009	-0.05514	-0.13404	-0.11186	-0.05333	-0.01375	-0.0265	-0.06338	-0.05129	-0.00633	-0.03406	-0.12262	-0.07788	0.06659	0.02503	-0.09391	-0.114	-0.10334	0.01958	0.18205	0.16863	0.07327	0.06762	0.11259	0.0459	-0.06779	-0.11991	-0.13188	-0.14505	-0.17565	-0.07679	0.09909	0.04813	-0.05946	0.0105	0.11212	0.17862	0.20371	0.04729	-0.08811	0.01853	0.16353	0.24442	0.32518	0.29748	0.13564	0.11502	0.27234
0.04365	0.03027	0.02973	-0.05534	-0.13573	-0.11353	-0.04781	-0.00534	-0.02503	-0.06843	-0.05453	-0.00513	-0.03268	-0.12058	-0.07504	0.06758	0.02804	-0.09063	-0.11611	-0.10686	0.01846	0.18347	0.17633	0.08692	0.07884	0.11854	0.04906	-0.06431	-0.11495	-0.12911	-0.1491	-0.1831	-0.0825	0.09616	0.0487	-0.05625	0.0105	0.10581	0.17185	0.20013	0.0491	-0.08444	0.01563	0.15622	0.24068	0.3229	0.28999	0.12403	0.10133	0.25894
0.04389	0.02974	0.02884	-0.0559	-0.13762	-0.11562	-0.04289	0.00258	-0.02353	-0.07283	-0.05698	-0.00341	-0.03114	-0.11848	-0.07211	0.06856	0.03101	-0.08743	-0.11837	-0.11042	0.01752	0.18503	0.18421	0.10084	0.09005	0.12433	0.05235	-0.06052	-0.10996	-0.1267	-0.15357	-0.19086	-0.0884	0.09309	0.04934	-0.05297	0.01044	0.09967	0.16526	0.1964	0.05083	-0.08068	0.01274	0.14883	0.23671	0.32017	0.28209	0.1123	0.08749	0.24516
0.04413	0.02892	0.02743	-0.05684	-0.13972	-0.11811	-0.03856	0.01	-0.02198	-0.07651	-0.05862	-0.00114	-0.02942	-0.11633	-0.06912	0.06952	0.03391	-0.08434	-0.12076	-0.11396	0.01678	0.18672	0.1922	0.11491	0.10115	0.12987	0.05572	-0.05642	-0.10493	-0.12463	-0.15845	-0.19887	-0.09447	0.08989	0.05006	-0.04964	0.01033	0.09375	0.1589	0.19256	0.0525	-0.07682	0.00989	0.14141	0.23254	0.31698	0.2738	0.10048	0.07356	0.23104
0.04437	0.0278	0.02549	-0.05814	-0.14202	-0.121	-0.03484	0.01688	-0.02038	-0.07947	-0.05942	0.00165	-0.02753	-0.11413	-0.06608	0.07046	0.03671	-0.0814	-0.12325	-0.11743	0.01629	0.18851	0.20021	0.12902	0.11207	0.13513	0.05916	-0.052	-0.09984	-0.12289	-0.1637	-0.20711	-0.10066	0.0866	0.05083	-0.0463	0.01017	0.08809	0.1528	0.18864	0.0541	-0.07285	0.00712	0.13401	0.22819	0.31335	0.26512	0.08864	0.05959	0.21663
0.04462	0.0264	0.02304	-0.05981	-0.14451	-0.12427	-0.03172	0.02322	-0.01874	-0.08167	-0.05937	0.00496	-0.02546	-0.11189	-0.06301	0.07135	0.03937	-0.07866	-0.12583	-0.12079	0.01606	0.1904	0.20817	0.14306	0.12272	0.14004	0.06264	-0.04727	-0.09469	-0.12145	-0.16929	-0.21552	-0.10694	0.08324	0.05167	-0.04296	0.00998	0.08273	0.14701	0.18465	0.05565	-0.06877	0.00447	0.12669	0.2237	0.30927	0.25609	0.07682	0.04566	0.20199
0.04486	0.02471	0.02007	-0.06185	-0.14719	-0.1279	-0.02919	0.029	-0.01704	-0.0831	-0.05847	0.0088	-0.02323	-0.10963	-0.05995	0.07218	0.04185	-0.07615	-0.12848	-0.12398	0.01612	0.19236	0.216	0.15691	0.133	0.14454	0.06613	-0.04221	-0.08947	-0.1203	-0.17516	-0.22405	-0.11328	0.07983	0.05255	-0.03964	0.00977	0.07773	0.14155	0.18063	0.05716	-0.06458	0.00197	0.1195	0.21909	0.30475	0.24673	0.06507	0.03183	0.18716
0.0451	0.02273	0.01659	-0.06424	-0.15005	-0.13185	-0.02725	0.03421	-0.01531	-0.08375	-0.05671	0.01313	-0.02083	-0.10735	-0.05691	0.07294	0.04412	-0.07392	-0.13117	-0.12697	0.01648	0.19437	0.22362	0.17047	0.14283	0.14859	0.06963	-0.03683	-0.08414	-0.1194	-0.18127	-0.23266	-0.11964	0.07639	0.05349	-0.03634	0.00958	0.07312	0.13647	0.1766	0.05864	-0.06027	-0.000357824	0.11249	0.21439	0.29981	0.23706	0.05344	0.01814	0.1722
0.04534	0.02047	0.01262	-0.06697	-0.15306	-0.13611	-0.02588	0.03885	-0.01352	-0.08363	-0.05412	0.01794	-0.01827	-0.10506	-0.05392	0.07359	0.04614	-0.07198	-0.1339	-0.12971	0.01716	0.19641	0.23096	0.18363	0.15214	0.15214	0.0731	-0.03111	-0.07869	-0.1187	-0.18757	-0.24128	-0.12598	0.07296	0.05449	-0.03308	0.00941	0.06894	0.13178	0.17261	0.06011	-0.05585	-0.00248	0.1057	0.20963	0.29445	0.22712	0.04197	0.00468	0.15718
0.04559	0.01793	0.00816	-0.07002	-0.1562	-0.14063	-0.02506	0.04293	-0.0117	-0.08274	-0.0507	0.0232	-0.01557	-0.10279	-0.05102	0.07412	0.04786	-0.07037	-0.13663	-0.13215	0.01818	0.19846	0.23794	0.19628	0.16086	0.15516	0.07654	-0.02506	-0.0731	-0.11817	-0.19399	-0.24985	-0.13225	0.06956	0.05554	-0.02984	0.00929	0.06522	0.12753	0.16868	0.06159	-0.0513	-0.00436	0.09919	0.20483	0.2887	0.21693	0.03072	-0.00851	0.14215
0.04583	0.01511	0.00324	-0.07337	-0.15946	-0.14537	-0.02475	0.04644	-0.00985	-0.0811	-0.04648	0.0289	-0.01274	-0.10053	-0.04822	0.0745	0.04926	-0.06913	-0.13934	-0.13427	0.01954	0.2005	0.24451	0.20834	0.16892	0.15762	0.07993	-0.01867	-0.06734	-0.11777	-0.20046	-0.25832	-0.13843	0.06621	0.05665	-0.02665	0.00925	0.062	0.12374	0.16485	0.06311	-0.04663	-0.00599	0.09298	0.20002	0.28255	0.20653	0.01973	-0.02137	0.12717
0.04607	0.01204	-0.00212	-0.07699	-0.16279	-0.1503	-0.02493	0.04941	-0.00798	-0.07874	-0.04149	0.03499	-0.00979	-0.09832	-0.04555	0.07471	0.0503	-0.06826	-0.14201	-0.13603	0.02124	0.2025	0.2506	0.21971	0.17627	0.1595	0.08326	-0.01194	-0.06138	-0.11743	-0.20694	-0.26661	-0.14445	0.06292	0.05781	-0.02348	0.00931	0.05928	0.12042	0.16117	0.06467	-0.04183	-0.00735	0.08711	0.19522	0.27603	0.19593	0.00903	-0.03386	0.11229
0.04631	0.00871	-0.00789	-0.08086	-0.16617	-0.15536	-0.02554	0.05185	-0.00609	-0.07569	-0.03577	0.04144	-0.00674	-0.09616	-0.04305	0.07473	0.05095	-0.06779	-0.14461	-0.1374	0.0233	0.20445	0.25615	0.23032	0.18286	0.16077	0.08654	-0.00485	-0.05521	-0.11711	-0.21333	-0.27465	-0.1503	0.05972	0.05902	-0.02033	0.00949	0.0571	0.11761	0.15768	0.06632	-0.03689	-0.0084	0.0816	0.19044	0.26915	0.18518	-0.00134	-0.04593	0.09757
0.04656	0.00515	-0.01406	-0.08493	-0.16956	-0.16052	-0.02655	0.05379	-0.0042	-0.07199	-0.02937	0.04821	-0.00361	-0.09407	-0.04074	0.07452	0.05118	-0.06773	-0.14712	-0.13835	0.0257	0.20632	0.26112	0.24011	0.18865	0.16145	0.08975	0.00259	-0.04878	-0.11676	-0.21959	-0.28239	-0.15591	0.05661	0.06028	-0.01722	0.00982	0.05547	0.11531	0.15441	0.06807	-0.03181	-0.00914	0.0765	0.18571	0.26192	0.17429	-0.01133	-0.05755	0.08307
0.0468	0.00135	-0.02057	-0.08917	-0.17294	-0.1657	-0.02791	0.05525	-0.00232	-0.06768	-0.02232	0.05527	-0.000413831	-0.09207	-0.03864	0.07406	0.05097	-0.06809	-0.14951	-0.13886	0.02844	0.20809	0.26546	0.249	0.19362	0.16152	0.09291	0.0104	-0.04208	-0.11631	-0.22563	-0.28975	-0.16127	0.05362	0.06158	-0.01412	0.01031	0.05439	0.11355	0.15141	0.06996	-0.02658	-0.00955	0.07181	0.18103	0.25435	0.16329	-0.02094	-0.06869	0.06883
0.04704	-0.00265	-0.02741	-0.09354	-0.17625	-0.17088	-0.02957	0.05625	-0.000461586	-0.06282	-0.01468	0.06257	0.00283	-0.09017	-0.03679	0.07334	0.05028	-0.06888	-0.15177	-0.1389	0.03151	0.20974	0.26912	0.25695	0.19774	0.16099	0.096	0.01857	-0.03507	-0.11571	-0.23138	-0.29667	-0.16631	0.05074	0.0629	-0.01104	0.01097	0.05385	0.11233	0.14871	0.07201	-0.02121	-0.00961	0.06756	0.17642	0.24645	0.15222	-0.03013	-0.07932	0.05492
0.04728	-0.00686	-0.03453	-0.09801	-0.17947	-0.17599	-0.03148	0.05684	0.00137	-0.05744	-0.0065	0.07008	0.00609	-0.08839	-0.0352	0.07233	0.04912	-0.07008	-0.15386	-0.13848	0.03489	0.21124	0.27208	0.26392	0.201	0.15988	0.09906	0.02711	-0.02773	-0.11491	-0.23677	-0.30307	-0.17102	0.04797	0.06424	-0.00798	0.01182	0.05387	0.11165	0.14637	0.07424	-0.01567	-0.0093	0.06377	0.17188	0.23823	0.14109	-0.03889	-0.08943	0.04138
0.04753	-0.01123	-0.04188	-0.10252	-0.18256	-0.18098	-0.03358	0.05704	0.00315	-0.0516	0.00216	0.07775	0.00936	-0.08673	-0.03389	0.07103	0.04747	-0.07169	-0.15577	-0.13758	0.03857	0.21258	0.27432	0.26988	0.20341	0.15822	0.10208	0.03603	-0.02005	-0.11385	-0.24174	-0.30891	-0.17535	0.04533	0.06556	-0.00495	0.01286	0.05441	0.11153	0.14441	0.07669	-0.00997	-0.00862	0.06046	0.16744	0.22972	0.12993	-0.0472	-0.09898	0.02826
0.04777	-0.01577	-0.04944	-0.10703	-0.18547	-0.18581	-0.03582	0.0569	0.00489	-0.04537	0.01123	0.08554	0.01263	-0.08523	-0.03288	0.06941	0.04533	-0.0737	-0.15748	-0.13619	0.04251	0.21372	0.2758	0.2748	0.20496	0.15603	0.10508	0.04532	-0.01199	-0.11249	-0.24622	-0.3141	-0.17927	0.04281	0.06685	-0.00193	0.01409	0.05547	0.11196	0.14288	0.07938	-0.00409	-0.00755	0.05762	0.16308	0.2209	0.11876	-0.05505	-0.10798	0.0156
0.04801	-0.02044	-0.05715	-0.1115	-0.18818	-0.19042	-0.03815	0.05644	0.00657	-0.03879	0.02066	0.09341	0.01586	-0.08387	-0.03217	0.06747	0.0427	-0.07608	-0.15896	-0.13434	0.04669	0.21465	0.27652	0.27867	0.20569	0.15336	0.10808	0.05499	-0.00355	-0.11077	-0.25015	-0.31861	-0.18274	0.04039	0.0681	0.00105	0.01552	0.05701	0.11293	0.14182	0.08233	0.00195	-0.00609	0.05528	0.15881	0.21181	0.1076	-0.06243	-0.11642	0.00345
0.04825	-0.02522	-0.06496	-0.11588	-0.19064	-0.19478	-0.04053	0.05571	0.00818	-0.03191	0.03039	0.10132	0.01904	-0.08268	-0.03177	0.06523	0.0396	-0.07881	-0.16019	-0.13202	0.05107	0.21534	0.27647	0.28151	0.2056	0.15024	0.11109	0.06502	0.00528	-0.10866	-0.25348	-0.32237	-0.18575	0.03808	0.06926	0.00399	0.01714	0.05903	0.11444	0.14124	0.08557	0.00815	-0.00424	0.05342	0.15465	0.20244	0.09649	-0.06934	-0.1243	-0.00815
0.0485	-0.0301	-0.07283	-0.12012	-0.19282	-0.19884	-0.0429	0.05473	0.00972	-0.02481	0.04034	0.10922	0.02217	-0.08165	-0.03168	0.06267	0.03604	-0.08185	-0.16116	-0.12925	0.05561	0.21577	0.27564	0.2833	0.20474	0.14672	0.11415	0.07543	0.01451	-0.10613	-0.25614	-0.32533	-0.18826	0.03586	0.07032	0.00689	0.01895	0.06147	0.11649	0.14119	0.08911	0.01453	-0.002	0.05206	0.15057	0.19282	0.08543	-0.07579	-0.13162	-0.01919
0.04874	-0.03503	-0.0807	-0.12417	-0.19469	-0.20257	-0.04523	0.05355	0.01117	-0.01752	0.05047	0.11706	0.02521	-0.0808	-0.03192	0.0598	0.03206	-0.08516	-0.16185	-0.12605	0.06027	0.21592	0.27405	0.28407	0.20314	0.14286	0.11726	0.0862	0.02414	-0.10314	-0.25811	-0.32745	-0.19026	0.03371	0.07125	0.00972	0.02093	0.06432	0.11906	0.1417	0.09297	0.02108	0.000621408	0.05117	0.14659	0.18297	0.07445	-0.08177	-0.1384	-0.02963
0.04898	-0.04	-0.08851	-0.12797	-0.19621	-0.20594	-0.04749	0.05218	0.01254	-0.01012	0.06069	0.12482	0.02816	-0.08013	-0.03246	0.05664	0.02767	-0.08871	-0.16225	-0.12245	0.065	0.21577	0.2717	0.28385	0.20085	0.13871	0.12045	0.09731	0.03417	-0.0997	-0.25935	-0.32869	-0.19172	0.03163	0.07201	0.01249	0.02306	0.06754	0.12213	0.14279	0.09717	0.02778	0.00362	0.05074	0.14268	0.17288	0.06358	-0.0873	-0.14465	-0.03945
0.04922	-0.04498	-0.09621	-0.13149	-0.19737	-0.20891	-0.04963	0.05067	0.0138	-0.00266	0.07094	0.13245	0.03099	-0.07963	-0.03331	0.0532	0.02291	-0.09245	-0.16234	-0.11847	0.06975	0.21529	0.2686	0.28265	0.19791	0.13433	0.12375	0.10876	0.04457	-0.09577	-0.25983	-0.32903	-0.19263	0.02959	0.07258	0.01517	0.02535	0.0711	0.1257	0.14448	0.10172	0.03463	0.00697	0.05076	0.13886	0.1626	0.05284	-0.09238	-0.15039	-0.04865
0.04947	-0.04994	-0.10375	-0.13466	-0.19812	-0.21148	-0.05163	0.04903	0.01494	0.0048	0.08117	0.13991	0.03371	-0.07932	-0.03446	0.0495	0.01783	-0.09634	-0.1621	-0.11416	0.07448	0.21446	0.26477	0.28052	0.19438	0.12978	0.12715	0.12052	0.05532	-0.09137	-0.25953	-0.32844	-0.19298	0.02759	0.07292	0.01774	0.02777	0.07496	0.12974	0.1468	0.10664	0.04163	0.01067	0.0512	0.13511	0.15213	0.04225	-0.09703	-0.15565	-0.05723
0.04971	-0.05484	-0.11105	-0.13745	-0.19846	-0.21361	-0.05345	0.04729	0.01597	0.01222	0.09131	0.14716	0.03628	-0.0792	-0.0359	0.04556	0.01245	-0.10031	-0.16154	-0.10953	0.07913	0.21327	0.26024	0.27748	0.19032	0.12512	0.13069	0.13256	0.06641	-0.0865	-0.25843	-0.3269	-0.19276	0.02559	0.073	0.02019	0.03031	0.07908	0.13424	0.14975	0.11192	0.04876	0.01468	0.05204	0.13141	0.1415	0.03184	-0.10127	-0.16046	-0.06518
0.04995	-0.05965	-0.11807	-0.1398	-0.19836	-0.2153	-0.05508	0.04547	0.01686	0.01954	0.10129	0.15416	0.0387	-0.07925	-0.0376	0.04139	0.00683	-0.10433	-0.16065	-0.10464	0.08365	0.2117	0.25501	0.27359	0.18577	0.12039	0.13437	0.14486	0.07779	-0.08116	-0.25654	-0.3244	-0.19196	0.02359	0.07278	0.02248	0.03295	0.08343	0.13917	0.15334	0.11759	0.056	0.01899	0.05325	0.12777	0.13073	0.02163	-0.10511	-0.16484	-0.07252
0.05019	-0.06435	-0.12475	-0.14168	-0.19781	-0.21654	-0.0565	0.04361	0.01762	0.02671	0.11106	0.16088	0.04096	-0.07948	-0.03957	0.03704	0.00103	-0.10834	-0.15942	-0.09953	0.088	0.20974	0.24913	0.26889	0.18079	0.11565	0.13819	0.15738	0.08943	-0.07539	-0.25385	-0.32094	-0.19057	0.02157	0.07224	0.02461	0.03566	0.08797	0.1445	0.15758	0.12362	0.06335	0.02358	0.0548	0.12418	0.11986	0.01164	-0.10857	-0.16883	-0.07926
0.05044	-0.06889	-0.13102	-0.14305	-0.19682	-0.21733	-0.05769	0.04171	0.01824	0.03368	0.12055	0.16729	0.04305	-0.07988	-0.04177	0.03253	-0.00493	-0.11228	-0.15785	-0.09423	0.09213	0.20738	0.24263	0.26343	0.17544	0.11096	0.14217	0.17008	0.10128	-0.06921	-0.25038	-0.3165	-0.1886	0.01951	0.07134	0.02654	0.03843	0.09267	0.15021	0.16245	0.13003	0.07079	0.0284	0.05666	0.12062	0.10893	0.00191	-0.11167	-0.17247	-0.08543
0.05068	-0.07324	-0.13684	-0.14388	-0.19537	-0.21768	-0.05865	0.0398	0.0187	0.0404	0.12971	0.17335	0.04496	-0.08045	-0.04418	0.02788	-0.01096	-0.1161	-0.15594	-0.0888	0.09599	0.20462	0.23554	0.25725	0.16978	0.10635	0.14629	0.18292	0.11329	-0.06264	-0.24613	-0.31111	-0.18605	0.01741	0.07005	0.02825	0.04124	0.09748	0.15624	0.16794	0.13679	0.07831	0.03345	0.0588	0.11709	0.09795	-0.00755	-0.11444	-0.17578	-0.09105
0.05092	-0.07739	-0.14216	-0.14414	-0.19346	-0.21759	-0.05936	0.03788	0.01901	0.04683	0.13849	0.17903	0.04667	-0.08117	-0.04678	0.02313	-0.01704	-0.11975	-0.15369	-0.08328	0.09954	0.20146	0.22791	0.25042	0.16385	0.10188	0.15055	0.19584	0.12542	-0.05573	-0.24112	-0.30477	-0.18291	0.01524	0.06834	0.02971	0.04408	0.10238	0.16257	0.17402	0.1439	0.08587	0.03868	0.06118	0.11358	0.08698	-0.01671	-0.11688	-0.1788	-0.09616
0.05116	-0.08128	-0.14692	-0.14381	-0.19112	-0.21708	-0.05985	0.03597	0.01916	0.05292	0.14682	0.1843	0.04819	-0.08204	-0.04955	0.01831	-0.02311	-0.12318	-0.15112	-0.07773	0.10274	0.1979	0.21977	0.24298	0.15772	0.09758	0.15494	0.20878	0.13759	-0.04851	-0.23539	-0.2975	-0.17921	0.01299	0.0662	0.03091	0.04692	0.10733	0.16915	0.18066	0.15132	0.09347	0.04407	0.06377	0.1101	0.07605	-0.02554	-0.11903	-0.18156	-0.10078
0.05141	-0.0849	-0.15109	-0.14289	-0.18834	-0.21617	-0.06011	0.03406	0.01912	0.05863	0.15466	0.18913	0.04951	-0.08304	-0.05246	0.01344	-0.02911	-0.12633	-0.14823	-0.07218	0.10555	0.19396	0.21118	0.23501	0.15144	0.09349	0.15944	0.2217	0.14975	-0.04104	-0.22897	-0.28933	-0.17495	0.01065	0.06359	0.03181	0.04975	0.1123	0.17592	0.18783	0.15904	0.10106	0.04958	0.06652	0.10664	0.06521	-0.03401	-0.12091	-0.18409	-0.10496
0.05165	-0.08822	-0.15464	-0.14134	-0.18514	-0.21488	-0.06015	0.03217	0.01891	0.06393	0.16196	0.19351	0.05062	-0.08417	-0.05549	0.00856	-0.035	-0.12918	-0.14505	-0.0667	0.10795	0.18965	0.20219	0.22654	0.14506	0.08964	0.16404	0.23452	0.16183	-0.03336	-0.22188	-0.28029	-0.17016	0.00822	0.06049	0.0324	0.05256	0.11726	0.18285	0.19546	0.16701	0.10864	0.05517	0.06941	0.1032	0.0545	-0.04211	-0.12254	-0.18642	-0.10874
0.05189	-0.09122	-0.15752	-0.13918	-0.18154	-0.21322	-0.05999	0.03029	0.0185	0.06876	0.16868	0.19741	0.05152	-0.08541	-0.05864	0.00367	-0.04075	-0.13168	-0.14158	-0.06134	0.10991	0.18499	0.19284	0.21765	0.13861	0.08604	0.16871	0.24718	0.17376	-0.02553	-0.21417	-0.27042	-0.16487	0.00566	0.0569	0.03266	0.05536	0.12221	0.18989	0.20351	0.17519	0.11615	0.06081	0.0724	0.09978	0.04398	-0.0498	-0.12392	-0.18858	-0.11215
0.05213	-0.09386	-0.1597	-0.1364	-0.17754	-0.21121	-0.05965	0.02843	0.01788	0.0731	0.17478	0.20081	0.0522	-0.08677	-0.06187	-0.0012	-0.04631	-0.13379	-0.13786	-0.05614	0.1114	0.18	0.18319	0.20839	0.13216	0.08273	0.17342	0.25962	0.18547	-0.0176	-0.20589	-0.25977	-0.15908	0.00299	0.05279	0.03258	0.05812	0.12711	0.19698	0.21192	0.18355	0.12357	0.06646	0.07544	0.09639	0.03369	-0.05706	-0.1251	-0.19059	-0.11524
0.05238	-0.09614	-0.16118	-0.133	-0.17317	-0.20889	-0.05914	0.02656	0.01706	0.07692	0.18021	0.2037	0.05267	-0.08823	-0.06518	-0.00604	-0.05165	-0.13549	-0.13391	-0.05116	0.11241	0.17472	0.1733	0.19881	0.12572	0.0797	0.17814	0.27176	0.1969	-0.00962	-0.19708	-0.24838	-0.15285	0.000172288	0.04817	0.03215	0.06086	0.13195	0.20407	0.22061	0.19202	0.13086	0.07207	0.07851	0.09302	0.02368	-0.06386	-0.12607	-0.19248	-0.11804
0.05262	-0.09803	-0.16193	-0.129	-0.16844	-0.20627	-0.05847	0.0247	0.01601	0.08019	0.18496	0.20606	0.05291	-0.08979	-0.06857	-0.01083	-0.05674	-0.13676	-0.12977	-0.04646	0.11293	0.16918	0.16322	0.18896	0.11935	0.07698	0.18284	0.28353	0.20796	-0.00165	-0.18778	-0.23629	-0.1462	-0.00278	0.04303	0.03137	0.06357	0.13673	0.21112	0.22953	0.20055	0.13796	0.0776	0.08155	0.08968	0.014	-0.07019	-0.12685	-0.19427	-0.1206
0.05286	-0.09952	-0.16195	-0.12441	-0.16338	-0.20337	-0.05766	0.02285	0.01474	0.08288	0.189	0.2079	0.05292	-0.09145	-0.07201	-0.01557	-0.06155	-0.13757	-0.12546	-0.04207	0.11295	0.16341	0.15299	0.1789	0.11305	0.07456	0.18749	0.29487	0.2186	0.00626	-0.17805	-0.22358	-0.13916	-0.00588	0.03739	0.03023	0.06627	0.14143	0.21806	0.23859	0.20907	0.14484	0.08301	0.08453	0.08637	0.00469	-0.07601	-0.12746	-0.19598	-0.12295
0.0531	-0.10061	-0.16124	-0.11927	-0.15801	-0.20021	-0.05673	0.02099	0.01325	0.08498	0.19232	0.20919	0.0527	-0.09319	-0.07551	-0.02025	-0.06608	-0.13793	-0.12103	-0.03803	0.11248	0.15746	0.14268	0.16867	0.10687	0.07245	0.19204	0.30571	0.22874	0.01405	-0.16793	-0.21027	-0.13177	-0.00913	0.03125	0.02876	0.06896	0.14604	0.22485	0.24771	0.21753	0.15145	0.08825	0.08742	0.0831	-0.0042	-0.08133	-0.12791	-0.19762	-0.12513
0.05335	-0.10129	-0.15982	-0.1136	-0.15236	-0.19681	-0.05568	0.01912	0.01151	0.08648	0.19489	0.20994	0.05226	-0.09503	-0.07906	-0.02489	-0.0703	-0.13782	-0.1165	-0.0344	0.11153	0.15136	0.13233	0.15832	0.10082	0.07063	0.19645	0.31597	0.23832	0.02168	-0.15746	-0.19644	-0.12407	-0.01251	0.02464	0.02696	0.07165	0.15056	0.23143	0.25681	0.22586	0.15774	0.09328	0.09019	0.07987	-0.01263	-0.08611	-0.12822	-0.1992	-0.12717
0.05359	-0.10156	-0.15769	-0.10745	-0.14646	-0.19319	-0.05453	0.01724	0.00954	0.08736	0.19671	0.21015	0.05158	-0.09695	-0.08265	-0.02947	-0.07422	-0.13725	-0.11193	-0.0312	0.11009	0.14515	0.122	0.14788	0.09493	0.0691	0.20069	0.32559	0.24728	0.02911	-0.14669	-0.18213	-0.11608	-0.01603	0.01759	0.02486	0.07435	0.15496	0.23775	0.26582	0.23399	0.16366	0.09806	0.0928	0.07668	-0.02059	-0.09037	-0.12839	-0.20075	-0.12911
0.05383	-0.10142	-0.15488	-0.10085	-0.14033	-0.18936	-0.05328	0.01535	0.00731	0.08761	0.19778	0.20983	0.05068	-0.09893	-0.08628	-0.03401	-0.07784	-0.13622	-0.10733	-0.02846	0.10821	0.1389	0.11174	0.13742	0.08919	0.06785	0.20472	0.3345	0.25556	0.03629	-0.13566	-0.16739	-0.10784	-0.01968	0.01014	0.02248	0.07708	0.15925	0.24375	0.27463	0.24184	0.16917	0.10255	0.09522	0.07353	-0.02803	-0.09408	-0.12843	-0.20225	-0.13096
0.05407	-0.10088	-0.15143	-0.09387	-0.13401	-0.18533	-0.05194	0.01345	0.00484	0.08723	0.1981	0.20897	0.04955	-0.10098	-0.08996	-0.03852	-0.08117	-0.13476	-0.10276	-0.02622	0.10588	0.13263	0.1016	0.12696	0.08364	0.06686	0.2085	0.34265	0.2631	0.04318	-0.1244	-0.15228	-0.09938	-0.02343	0.00233	0.01986	0.07985	0.16341	0.24939	0.28318	0.24935	0.17422	0.10672	0.09743	0.07044	-0.03494	-0.09727	-0.12837	-0.20373	-0.13276
0.05432	-0.09995	-0.14737	-0.08654	-0.12753	-0.18111	-0.05052	0.01154	0.00211	0.08621	0.19767	0.20759	0.04821	-0.10308	-0.09367	-0.04303	-0.08422	-0.13289	-0.09826	-0.02449	0.10315	0.1264	0.09162	0.11655	0.07828	0.06612	0.212	0.34998	0.26987	0.04975	-0.11295	-0.13686	-0.09074	-0.02726	-0.00579	0.01702	0.08266	0.16744	0.25462	0.29137	0.25646	0.17878	0.11053	0.0994	0.06739	-0.04131	-0.09992	-0.12821	-0.20518	-0.13452
0.05456	-0.09864	-0.14274	-0.07894	-0.12091	-0.17671	-0.049	0.00961	-0.000875461	0.08455	0.19651	0.20571	0.04666	-0.10522	-0.09741	-0.04754	-0.08702	-0.13063	-0.09385	-0.02327	0.10005	0.12026	0.08185	0.10623	0.07312	0.06561	0.21518	0.35644	0.27581	0.05598	-0.10136	-0.12116	-0.08193	-0.03116	-0.01417	0.01401	0.08554	0.17132	0.25938	0.29913	0.26309	0.18279	0.11396	0.10111	0.06439	-0.04712	-0.10207	-0.12795	-0.20661	-0.13626
0.0548	-0.09698	-0.1376	-0.07111	-0.11417	-0.17213	-0.04738	0.00767	-0.00413	0.08226	0.19464	0.20333	0.04491	-0.10738	-0.10119	-0.05207	-0.0896	-0.12802	-0.08958	-0.0226	0.0966	0.11424	0.07235	0.09603	0.06817	0.06531	0.21802	0.362	0.28089	0.06184	-0.08964	-0.10524	-0.07299	-0.0351	-0.02275	0.01088	0.08849	0.17504	0.26365	0.30639	0.26918	0.18623	0.11697	0.10255	0.06144	-0.05237	-0.10372	-0.12762	-0.20801	-0.13799
0.05504	-0.09498	-0.13199	-0.06312	-0.10736	-0.16737	-0.04566	0.00573	-0.00765	0.07934	0.19207	0.20048	0.04296	-0.10956	-0.10499	-0.05665	-0.09199	-0.1251	-0.08547	-0.02245	0.09284	0.1084	0.06315	0.08601	0.06343	0.06522	0.22049	0.36661	0.2851	0.06732	-0.07785	-0.08916	-0.06394	-0.03905	-0.03145	0.00767	0.09153	0.1786	0.26737	0.31307	0.27469	0.18906	0.11955	0.10369	0.05853	-0.05708	-0.1049	-0.12722	-0.20938	-0.13971
0.05529	-0.09267	-0.12598	-0.05503	-0.1005	-0.16242	-0.04381	0.00379	-0.01143	0.0758	0.18883	0.19718	0.04085	-0.11172	-0.10882	-0.06129	-0.09423	-0.12192	-0.08156	-0.02284	0.08883	0.10277	0.05429	0.07619	0.05892	0.0653	0.22259	0.37027	0.2884	0.07239	-0.066	-0.07295	-0.0548	-0.04297	-0.04022	0.00443	0.09467	0.18199	0.27052	0.31911	0.27954	0.19126	0.12167	0.10452	0.05566	-0.06124	-0.10564	-0.12675	-0.21071	-0.14141
0.05553	-0.09008	-0.11963	-0.0469	-0.0936	-0.15729	-0.04183	0.00187	-0.01548	0.07165	0.18496	0.19346	0.03856	-0.11387	-0.11266	-0.06602	-0.09635	-0.11851	-0.07788	-0.02375	0.08458	0.0974	0.04581	0.06662	0.05463	0.06556	0.22429	0.37295	0.29079	0.07705	-0.05412	-0.05667	-0.0456	-0.04684	-0.04898	0.00122	0.09791	0.18518	0.27307	0.32447	0.2837	0.19278	0.1233	0.10503	0.05283	-0.06489	-0.10596	-0.12624	-0.212	-0.1431
0.05577	-0.08723	-0.113	-0.0388	-0.0867	-0.15196	-0.0397	-1.93871e-05	-0.01979	0.06691	0.18047	0.18934	0.03614	-0.11596	-0.1165	-0.07084	-0.0984	-0.11493	-0.07445	-0.02517	0.08017	0.09232	0.03776	0.05733	0.05058	0.06597	0.2256	0.37466	0.29227	0.0813	-0.04226	-0.04037	-0.03636	-0.05061	-0.05766	-0.00191	0.10126	0.18818	0.27499	0.32907	0.28712	0.19362	0.12445	0.10522	0.05003	-0.06803	-0.10589	-0.12568	-0.21323	-0.14475
0.05601	-0.08416	-0.10615	-0.03078	-0.07982	-0.14644	-0.0374	-0.00187	-0.02436	0.0616	0.17542	0.18485	0.03358	-0.118	-0.12033	-0.07577	-0.10041	-0.11122	-0.07129	-0.02707	0.07561	0.08757	0.03017	0.04835	0.04677	0.06652	0.22653	0.37541	0.29285	0.08513	-0.03042	-0.02409	-0.0271	-0.05425	-0.06618	-0.00491	0.10473	0.19095	0.27626	0.33289	0.28976	0.19376	0.1251	0.10506	0.04725	-0.07071	-0.10548	-0.12509	-0.2144	-0.14635
0.05626	-0.0809	-0.09915	-0.0229	-0.07298	-0.14071	-0.03491	-0.00367	-0.02918	0.05573	0.16983	0.18002	0.0309	-0.11994	-0.12415	-0.08084	-0.10243	-0.10745	-0.06842	-0.02942	0.07098	0.08317	0.02306	0.03973	0.0432	0.0672	0.22707	0.3752	0.29253	0.08856	-0.01864	-0.00787	-0.01783	-0.05773	-0.07448	-0.00772	0.10831	0.19349	0.27687	0.3359	0.29161	0.19318	0.12523	0.10458	0.04449	-0.07294	-0.10476	-0.12447	-0.2155	-0.14789
0.0565	-0.07748	-0.09207	-0.01523	-0.0662	-0.13477	-0.03221	-0.00539	-0.03424	0.04934	0.16375	0.17489	0.02814	-0.12177	-0.12792	-0.08604	-0.10451	-0.10366	-0.06586	-0.03219	0.0663	0.07916	0.01647	0.03149	0.03989	0.068	0.22724	0.37406	0.29135	0.09157	-0.00694	0.00824	-0.00856	-0.061	-0.08247	-0.01031	0.11199	0.19577	0.2768	0.33806	0.29262	0.19188	0.12485	0.10376	0.04175	-0.07477	-0.10377	-0.12384	-0.21651	-0.14932
0.05674	-0.07393	-0.08496	-0.00781	-0.05951	-0.12861	-0.02928	-0.00703	-0.03952	0.04244	0.15722	0.16947	0.0253	-0.12347	-0.13165	-0.09141	-0.1067	-0.0999	-0.0636	-0.03535	0.06162	0.07554	0.01041	0.02367	0.03682	0.06891	0.22706	0.37204	0.28931	0.09419	0.00466	0.02421	0.000684692	-0.06401	-0.09008	-0.01261	0.11578	0.19778	0.27605	0.33937	0.29281	0.18985	0.12397	0.10262	0.03902	-0.07622	-0.10255	-0.1232	-0.21743	-0.15064
0.05698	-0.0703	-0.0779	-0.000701398	-0.05292	-0.12224	-0.02611	-0.00856	-0.04503	0.03505	0.15027	0.16381	0.0224	-0.12502	-0.13531	-0.09694	-0.10903	-0.09623	-0.06166	-0.03884	0.05699	0.07235	0.00491	0.01629	0.03401	0.06994	0.22655	0.36917	0.28647	0.09641	0.01613	0.04	0.0099	-0.06674	-0.09724	-0.01459	0.11964	0.19948	0.27463	0.33981	0.29215	0.18712	0.12258	0.10117	0.03631	-0.07735	-0.10116	-0.12257	-0.21825	-0.1518
0.05723	-0.0666	-0.07094	0.00606	-0.04645	-0.11565	-0.02269	-0.00998	-0.05075	0.02722	0.14295	0.15793	0.01947	-0.12638	-0.13888	-0.10266	-0.11156	-0.09271	-0.06003	-0.04262	0.05246	0.06958	-1.64524e-05	0.00939	0.03146	0.07107	0.22575	0.36549	0.28285	0.09826	0.02744	0.05557	0.01908	-0.06914	-0.10388	-0.01619	0.12357	0.20088	0.27253	0.3394	0.29065	0.18368	0.12071	0.09943	0.03361	-0.07818	-0.09963	-0.12196	-0.21896	-0.15279
0.05747	-0.06288	-0.06412	0.01243	-0.04012	-0.10885	-0.01899	-0.01127	-0.05665	0.01897	0.1353	0.15187	0.01653	-0.12753	-0.14236	-0.10857	-0.11433	-0.08936	-0.05869	-0.04664	0.04805	0.06724	-0.00436	0.00298	0.02918	0.07231	0.22468	0.36106	0.2785	0.09974	0.03859	0.07087	0.0282	-0.07116	-0.10994	-0.0174	0.12755	0.20194	0.26977	0.33814	0.28834	0.17956	0.11836	0.0974	0.03094	-0.07877	-0.09801	-0.12139	-0.21956	-0.15357
0.05771	-0.05915	-0.05751	0.01838	-0.03394	-0.10183	-0.01502	-0.0124	-0.06273	0.01033	0.12737	0.14564	0.01358	-0.12847	-0.14573	-0.11468	-0.11738	-0.08625	-0.05765	-0.05083	0.0438	0.06532	-0.00813	-0.00292	0.02716	0.07365	0.22338	0.35595	0.27347	0.10086	0.04953	0.08589	0.03727	-0.07277	-0.11534	-0.01817	0.13156	0.20264	0.26637	0.33606	0.28522	0.17479	0.11555	0.09512	0.02828	-0.07914	-0.09636	-0.12086	-0.22003	-0.15411
0.05795	-0.05545	-0.05113	0.02388	-0.02793	-0.09462	-0.01077	-0.01338	-0.06895	0.00133	0.11918	0.13929	0.01065	-0.12917	-0.14896	-0.121	-0.12076	-0.08342	-0.05688	-0.05514	0.03975	0.06382	-0.01131	-0.00828	0.02542	0.07511	0.22189	0.35022	0.26781	0.10165	0.06025	0.10057	0.04628	-0.07393	-0.12004	-0.01847	0.13558	0.20298	0.26234	0.33317	0.28134	0.16941	0.11233	0.09261	0.02564	-0.07935	-0.0947	-0.1204	-0.22038	-0.15439
0.0582	-0.05179	-0.04503	0.02891	-0.02211	-0.08722	-0.00624	-0.01417	-0.07529	-0.00798	0.11079	0.13284	0.00776	-0.12962	-0.15205	-0.12752	-0.12449	-0.08091	-0.05637	-0.05952	0.03591	0.06272	-0.01391	-0.01309	0.02396	0.07667	0.22025	0.34393	0.26157	0.10211	0.07072	0.1149	0.05522	-0.07461	-0.12398	-0.01828	0.13958	0.20293	0.25771	0.32953	0.27672	0.16345	0.1087	0.08989	0.02304	-0.07944	-0.0931	-0.12001	-0.22059	-0.15438
0.05844	-0.04821	-0.03923	0.03347	-0.01648	-0.07966	-0.00144	-0.01478	-0.08173	-0.01756	0.10224	0.12631	0.00491	-0.12981	-0.15499	-0.13425	-0.12859	-0.07873	-0.05609	-0.06391	0.03231	0.06201	-0.01595	-0.01735	0.02278	0.07834	0.21849	0.33716	0.25481	0.10226	0.08092	0.12883	0.06407	-0.07477	-0.12711	-0.01759	0.14354	0.20249	0.25252	0.32517	0.27143	0.15697	0.10471	0.08699	0.02047	-0.07943	-0.09159	-0.11971	-0.22067	-0.15405
0.05868	-0.04472	-0.03377	0.03754	-0.01106	-0.07196	0.00362	-0.01518	-0.08824	-0.02738	0.09355	0.11973	0.00211	-0.12974	-0.15776	-0.14117	-0.13311	-0.07694	-0.05602	-0.06825	0.02897	0.06165	-0.01743	-0.02103	0.02189	0.08013	0.21664	0.32997	0.24759	0.10212	0.09082	0.14233	0.07284	-0.0744	-0.1294	-0.01636	0.14745	0.20165	0.24679	0.32013	0.26551	0.15001	0.10039	0.08393	0.01794	-0.07938	-0.09022	-0.11952	-0.2206	-0.15338
0.05892	-0.04133	-0.02864	0.04113	-0.00586	-0.06415	0.00892	-0.01537	-0.09478	-0.03739	0.08477	0.11311	-0.000626733	-0.12941	-0.16035	-0.14829	-0.13805	-0.07555	-0.05613	-0.0725	0.02589	0.06162	-0.01837	-0.02414	0.02128	0.08203	0.21475	0.32242	0.23997	0.1017	0.10039	0.15537	0.0815	-0.07347	-0.13081	-0.01461	0.15128	0.20041	0.24057	0.31448	0.25902	0.14266	0.09579	0.08075	0.01546	-0.07931	-0.08902	-0.11945	-0.22038	-0.15233
0.05917	-0.03807	-0.02387	0.04425	-0.000879246	-0.05628	0.01444	-0.01534	-0.10131	-0.04755	0.07594	0.10647	-0.00331	-0.12883	-0.16276	-0.15559	-0.14342	-0.07458	-0.0564	-0.0766	0.02308	0.06188	-0.0188	-0.02668	0.02097	0.08404	0.21284	0.3146	0.23199	0.10101	0.10963	0.16792	0.09005	-0.07196	-0.13133	-0.01231	0.15501	0.19878	0.2339	0.30826	0.25204	0.13497	0.09094	0.07748	0.01306	-0.07925	-0.08803	-0.1195	-0.22	-0.15089
0.05941	-0.03493	-0.01946	0.04691	0.00386	-0.04837	0.02014	-0.01509	-0.1078	-0.0578	0.06709	0.09984	-0.00592	-0.128	-0.16499	-0.16305	-0.14924	-0.07404	-0.05681	-0.08053	0.02054	0.06241	-0.01874	-0.02863	0.02094	0.08616	0.21093	0.30654	0.22372	0.10007	0.11848	0.17995	0.09847	-0.06987	-0.13093	-0.00947	0.15862	0.19675	0.22683	0.30155	0.24463	0.12701	0.08589	0.07416	0.01073	-0.07921	-0.08729	-0.1197	-0.21946	-0.14903
0.05965	-0.03194	-0.0154	0.04913	0.00837	-0.04047	0.02599	-0.0146	-0.1142	-0.06808	0.05825	0.09323	-0.00847	-0.12695	-0.16701	-0.17067	-0.15548	-0.07393	-0.05731	-0.08422	0.01828	0.06316	-0.01821	-0.03002	0.02119	0.08838	0.20906	0.29832	0.2152	0.09889	0.12695	0.19144	0.10676	-0.06718	-0.1296	-0.00608	0.16211	0.19434	0.21939	0.2944	0.23687	0.11887	0.0807	0.07081	0.00852	-0.07923	-0.08682	-0.12004	-0.21875	-0.14674
0.05989	-0.0291	-0.01169	0.05094	0.01262	-0.03263	0.03195	-0.01387	-0.12046	-0.07835	0.04945	0.08664	-0.01097	-0.12568	-0.16885	-0.1784	-0.16216	-0.07426	-0.05789	-0.08766	0.01627	0.06411	-0.01724	-0.03084	0.02171	0.09069	0.20723	0.28997	0.20648	0.09749	0.13501	0.20236	0.11491	-0.0639	-0.12734	-0.00217	0.16546	0.19156	0.21165	0.28688	0.22884	0.11062	0.0754	0.06749	0.00645	-0.07929	-0.08664	-0.12054	-0.21787	-0.14401
0.06014	-0.0264	-0.00833	0.05237	0.01662	-0.0249	0.03798	-0.0129	-0.12654	-0.08855	0.04074	0.0801	-0.01341	-0.12421	-0.17048	-0.18625	-0.16925	-0.07502	-0.05852	-0.0908	0.01453	0.06521	-0.01586	-0.03111	0.02251	0.09309	0.20545	0.28156	0.1976	0.09586	0.14263	0.2127	0.12289	-0.06002	-0.12415	0.00228	0.16866	0.18845	0.20364	0.27905	0.22063	0.10234	0.07007	0.06422	0.00454	-0.07942	-0.08677	-0.1212	-0.21681	-0.14083
0.06038	-0.02386	-0.00529	0.05345	0.02037	-0.01733	0.04402	-0.0117	-0.13238	-0.0986	0.03215	0.07362	-0.0158	-0.12257	-0.17193	-0.19416	-0.17672	-0.0762	-0.05917	-0.09362	0.01303	0.06643	-0.0141	-0.03084	0.02357	0.09555	0.20373	0.27311	0.18861	0.09403	0.14979	0.22242	0.13069	-0.05554	-0.12004	0.00723	0.17171	0.18502	0.19544	0.27098	0.2123	0.09413	0.06474	0.06106	0.00283	-0.07961	-0.08723	-0.12204	-0.21558	-0.1372
0.06062	-0.02148	-0.00255	0.05422	0.02385	-0.00999	0.05003	-0.01026	-0.13793	-0.10844	0.02371	0.06721	-0.01814	-0.12079	-0.17318	-0.20213	-0.18456	-0.07779	-0.05981	-0.0961	0.01176	0.06774	-0.012	-0.03006	0.02488	0.09807	0.20207	0.26465	0.17955	0.09201	0.1565	0.23151	0.13831	-0.05049	-0.11503	0.01268	0.17461	0.18131	0.18708	0.26273	0.20395	0.08606	0.05949	0.05805	0.00136	-0.07985	-0.08804	-0.12306	-0.21418	-0.13313
0.06086	-0.01924	-0.000104561	0.05471	0.02707	-0.00292	0.05594	-0.00858	-0.14314	-0.11801	0.01546	0.06088	-0.02045	-0.11889	-0.17424	-0.21011	-0.19273	-0.07976	-0.06044	-0.09823	0.01072	0.06911	-0.00959	-0.02878	0.02642	0.10062	0.20046	0.25622	0.17044	0.08982	0.16272	0.23996	0.14571	-0.04488	-0.10913	0.01862	0.17737	0.17735	0.17861	0.25434	0.19564	0.07822	0.05436	0.05523	0.000152518	-0.08014	-0.08919	-0.12427	-0.21261	-0.12861
0.06111	-0.01716	0.00208	0.05497	0.03003	0.00383	0.0617	-0.00667	-0.14795	-0.12725	0.00743	0.05464	-0.02272	-0.11691	-0.17512	-0.21807	-0.20118	-0.0821	-0.06103	-0.10001	0.00987	0.0705	-0.0069	-0.02703	0.02817	0.10318	0.19888	0.24781	0.16133	0.08747	0.16845	0.24775	0.15289	-0.03873	-0.10238	0.02501	0.17999	0.17319	0.17009	0.24589	0.18746	0.07069	0.04941	0.05263	-0.00074617	-0.08046	-0.09071	-0.12568	-0.21089	-0.12367
0.06135	-0.01523	0.00403	0.05502	0.03272	0.01019	0.06726	-0.00455	-0.15232	-0.13607	-0.000344353	0.04851	-0.02497	-0.11486	-0.17583	-0.22596	-0.20987	-0.08476	-0.06156	-0.10143	0.0092	0.07188	-0.00398	-0.02484	0.03012	0.10571	0.1973	0.23944	0.15222	0.08497	0.17368	0.25486	0.15981	-0.03206	-0.09481	0.03184	0.18248	0.16886	0.16157	0.2374	0.17946	0.06354	0.04469	0.05031	-0.0013	-0.08079	-0.09259	-0.12729	-0.20902	-0.11832
0.06159	-0.01343	0.00577	0.05492	0.03514	0.01611	0.07256	-0.00221	-0.1562	-0.14443	-0.00783	0.0425	-0.02722	-0.1128	-0.17636	-0.23375	-0.21873	-0.08773	-0.06203	-0.1025	0.00869	0.07324	-0.000849627	-0.02225	0.03224	0.1082	0.19571	0.23111	0.14316	0.08235	0.1784	0.26129	0.16647	-0.02492	-0.08645	0.03909	0.18486	0.16442	0.15308	0.22893	0.17172	0.05686	0.04026	0.04829	-0.00148	-0.08113	-0.09483	-0.12913	-0.20701	-0.11258
0.06183	-0.01176	0.00733	0.05471	0.03731	0.02157	0.07755	0.000323757	-0.15954	-0.15226	-0.01501	0.03662	-0.02945	-0.11074	-0.17672	-0.24138	-0.22771	-0.09095	-0.06243	-0.10324	0.00832	0.07454	0.00245	-0.01929	0.03451	0.11061	0.19406	0.2228	0.13415	0.07961	0.18262	0.26703	0.17284	-0.01734	-0.07736	0.04674	0.18715	0.15991	0.14468	0.22051	0.16428	0.05071	0.03617	0.0466	-0.00125	-0.08144	-0.09744	-0.13119	-0.20487	-0.10648
0.06208	-0.01022	0.00874	0.05443	0.03924	0.02651	0.08218	0.00304	-0.16231	-0.1595	-0.02184	0.03086	-0.0317	-0.10873	-0.17692	-0.2488	-0.23673	-0.0944	-0.06275	-0.10367	0.00805	0.07577	0.00588	-0.01599	0.0369	0.11289	0.19231	0.21451	0.12521	0.07678	0.18633	0.27207	0.17889	-0.00937	-0.06758	0.05475	0.18936	0.15537	0.13639	0.21217	0.1572	0.04515	0.03245	0.04528	-0.000585414	-0.0817	-0.10039	-0.13348	-0.20262	-0.10004
0.06232	-0.0088	0.01002	0.05412	0.04093	0.0309	0.0864	0.00592	-0.16447	-0.16609	-0.02831	0.02524	-0.03396	-0.10679	-0.17696	-0.25595	-0.24573	-0.09802	-0.06301	-0.10382	0.00788	0.07691	0.00942	-0.01241	0.03937	0.11503	0.19043	0.2062	0.11634	0.07388	0.18954	0.27642	0.1846	-0.00106	-0.05716	0.0631	0.19153	0.15086	0.12826	0.20393	0.15052	0.04024	0.02915	0.04435	0.000549718	-0.08189	-0.10368	-0.136	-0.20027	-0.09328
0.06256	-0.00749	0.01121	0.05383	0.0424	0.03472	0.09017	0.00893	-0.16601	-0.17199	-0.03438	0.01977	-0.03625	-0.10494	-0.17684	-0.26279	-0.25462	-0.10177	-0.0632	-0.10372	0.00776	0.07796	0.01303	-0.00856	0.04191	0.11697	0.18836	0.19787	0.10756	0.07091	0.19226	0.28007	0.18994	0.00755	-0.04617	0.07177	0.19366	0.14643	0.12032	0.19582	0.14427	0.03603	0.02631	0.04382	0.00217	-0.08197	-0.1073	-0.13875	-0.19783	-0.08624
0.0628	-0.00629	0.01233	0.05358	0.04367	0.03795	0.09346	0.01207	-0.16689	-0.17716	-0.04006	0.01443	-0.03858	-0.10321	-0.17655	-0.26925	-0.26333	-0.10561	-0.06333	-0.10341	0.00769	0.07891	0.01669	-0.00451	0.04447	0.11868	0.18607	0.18947	0.09888	0.06791	0.19449	0.28302	0.1949	0.0164	-0.03466	0.08072	0.19579	0.14211	0.1126	0.18784	0.13848	0.03256	0.02396	0.04372	0.0043	-0.08194	-0.11121	-0.14172	-0.19532	-0.07895
0.06305	-0.00518	0.0134	0.05343	0.04477	0.04059	0.09623	0.01529	-0.16711	-0.18155	-0.04531	0.00923	-0.04096	-0.10163	-0.17609	-0.27527	-0.27178	-0.10949	-0.06341	-0.10293	0.00763	0.07974	0.02037	-0.000276582	0.04703	0.12014	0.18351	0.181	0.0903	0.06489	0.19626	0.28529	0.19945	0.02543	-0.0227	0.08995	0.19795	0.13796	0.10511	0.17999	0.13317	0.02986	0.02211	0.04404	0.00694	-0.08174	-0.11541	-0.14493	-0.19275	-0.07144
0.06329	-0.00416	0.01443	0.0534	0.04572	0.04263	0.09847	0.01857	-0.16666	-0.18514	-0.05012	0.00417	-0.04339	-0.10021	-0.17545	-0.28079	-0.27987	-0.11336	-0.06347	-0.10233	0.00757	0.08048	0.02405	0.00409	0.04956	0.12129	0.18063	0.17241	0.08183	0.06189	0.19756	0.28688	0.20356	0.03459	-0.01034	0.0994	0.20015	0.13401	0.09788	0.17229	0.12834	0.02797	0.0208	0.0448	0.0101	-0.08138	-0.11987	-0.14835	-0.19013	-0.06375
0.06353	-0.00323	0.01546	0.05352	0.04655	0.04409	0.10015	0.02188	-0.16556	-0.18791	-0.0545	-0.000754059	-0.04588	-0.09895	-0.17462	-0.28576	-0.28755	-0.11717	-0.06351	-0.10164	0.00748	0.08111	0.02771	0.00854	0.05203	0.12211	0.1774	0.16369	0.07348	0.05892	0.19843	0.2878	0.20722	0.0438	0.00235	0.10908	0.20242	0.1303	0.09092	0.16471	0.124	0.02688	0.02003	0.04598	0.01377	-0.08083	-0.12455	-0.15197	-0.18749	-0.05593
0.06377	-0.00238	0.01648	0.05383	0.04729	0.04498	0.10127	0.02519	-0.16382	-0.18985	-0.05844	-0.00555	-0.04844	-0.09787	-0.1736	-0.2901	-0.29471	-0.12089	-0.06355	-0.10092	0.00736	0.08165	0.03132	0.01305	0.05439	0.12255	0.17377	0.1548	0.06527	0.05602	0.19889	0.28806	0.2104	0.05303	0.0153	0.11893	0.20479	0.12689	0.08424	0.15726	0.12015	0.02663	0.01982	0.04759	0.01795	-0.08007	-0.12943	-0.1558	-0.18484	-0.048
0.06402	-0.00162	0.01752	0.05433	0.04797	0.04534	0.10182	0.02845	-0.16146	-0.19095	-0.06193	-0.01024	-0.05106	-0.09697	-0.17235	-0.29377	-0.30129	-0.12448	-0.06362	-0.10022	0.00717	0.0821	0.03487	0.01757	0.05662	0.1226	0.1697	0.14574	0.0572	0.05323	0.19895	0.28768	0.2131	0.0622	0.02844	0.12895	0.20728	0.12378	0.07785	0.14991	0.11678	0.02718	0.02015	0.0496	0.02262	-0.07909	-0.13448	-0.15981	-0.1822	-0.04001
0.06426	-0.000932165	0.01856	0.05504	0.04862	0.0452	0.10182	0.03164	-0.15852	-0.19122	-0.065	-0.01481	-0.05376	-0.09623	-0.17087	-0.29671	-0.30722	-0.12789	-0.06374	-0.09958	0.00692	0.08248	0.03834	0.02205	0.05869	0.12221	0.16517	0.13649	0.0493	0.05056	0.19865	0.28667	0.21529	0.07126	0.04172	0.1391	0.20991	0.12103	0.07177	0.14267	0.11386	0.02854	0.02104	0.052	0.02777	-0.07787	-0.13966	-0.164	-0.17959	-0.03201
0.0645	-0.00032677	0.01962	0.05598	0.04928	0.0446	0.10128	0.03472	-0.15504	-0.19068	-0.06763	-0.01927	-0.05652	-0.09565	-0.16913	-0.29886	-0.31243	-0.13109	-0.06393	-0.09906	0.00657	0.0828	0.04172	0.02647	0.06055	0.12135	0.16014	0.12702	0.04158	0.04807	0.198	0.28505	0.21697	0.08015	0.05506	0.14935	0.21271	0.11865	0.06599	0.13552	0.11138	0.03069	0.02247	0.05477	0.03335	-0.07641	-0.14493	-0.16834	-0.17704	-0.02404
0.06474	0.000198255	0.02069	0.05715	0.04998	0.0436	0.10021	0.03764	-0.15108	-0.18936	-0.06987	-0.02365	-0.05935	-0.09522	-0.1671	-0.30017	-0.31685	-0.13406	-0.06421	-0.09868	0.00612	0.08308	0.04501	0.03078	0.06219	0.12	0.15459	0.11733	0.03406	0.04577	0.19705	0.28284	0.21812	0.08881	0.0684	0.15968	0.21569	0.11668	0.06052	0.12843	0.10931	0.0336	0.02443	0.05788	0.03935	-0.07471	-0.15027	-0.17283	-0.17458	-0.01614
0.06499	0.000641501	0.02176	0.05853	0.05075	0.04225	0.09865	0.04037	-0.1467	-0.18731	-0.07171	-0.02794	-0.06224	-0.0949	-0.16475	-0.3006	-0.32044	-0.13676	-0.0646	-0.0985	0.00555	0.08333	0.04819	0.03495	0.06357	0.11814	0.14849	0.10743	0.02677	0.04371	0.19581	0.28007	0.21874	0.0972	0.08167	0.17004	0.21886	0.11513	0.05537	0.12141	0.10762	0.03722	0.02689	0.0613	0.04571	-0.07276	-0.15561	-0.17745	-0.17223	-0.00838
0.06523	0.001	0.02282	0.06014	0.0516	0.04061	0.09662	0.04287	-0.14198	-0.18456	-0.0732	-0.03217	-0.06518	-0.09468	-0.16207	-0.3001	-0.32314	-0.13917	-0.06513	-0.09856	0.00487	0.08358	0.05126	0.03894	0.06466	0.11575	0.14184	0.0973	0.01973	0.04192	0.19433	0.27676	0.21883	0.10526	0.09481	0.18043	0.22224	0.11402	0.05053	0.11444	0.10628	0.04151	0.02982	0.065	0.0524	-0.07056	-0.16093	-0.18216	-0.17003	-0.000776849
0.06547	0.00128	0.02387	0.06194	0.05258	0.03873	0.09418	0.04509	-0.13698	-0.18119	-0.07435	-0.03634	-0.06816	-0.09452	-0.15901	-0.29865	-0.32491	-0.14128	-0.06582	-0.09888	0.00405	0.08383	0.05423	0.04275	0.06544	0.11281	0.13463	0.08695	0.01296	0.04043	0.19262	0.27295	0.21839	0.11295	0.10774	0.19079	0.22583	0.11336	0.046	0.10751	0.10525	0.04643	0.03321	0.06895	0.05937	-0.06812	-0.16618	-0.18696	-0.16798	0.00661
0.06571	0.00146	0.02487	0.06393	0.05369	0.0367	0.09135	0.04701	-0.1318	-0.17725	-0.07521	-0.04045	-0.07118	-0.09439	-0.15555	-0.29619	-0.32572	-0.14306	-0.06668	-0.0995	0.0031	0.08413	0.05709	0.04633	0.06591	0.10932	0.12686	0.07642	0.0065	0.03927	0.19071	0.26865	0.21742	0.12021	0.12042	0.20109	0.22965	0.11317	0.0418	0.1006	0.10449	0.05191	0.037	0.0731	0.06656	-0.06544	-0.17132	-0.19181	-0.16614	0.01374
0.06596	0.00155	0.02583	0.06608	0.05496	0.03457	0.0882	0.04858	-0.12652	-0.17282	-0.07579	-0.04453	-0.07421	-0.09425	-0.15165	-0.29272	-0.32554	-0.14452	-0.06772	-0.10044	0.00201	0.08448	0.05987	0.04968	0.06602	0.10528	0.11855	0.0657	0.000371005	0.03847	0.18865	0.2639	0.21592	0.12701	0.13277	0.21131	0.23368	0.11345	0.03791	0.09372	0.10395	0.05789	0.04117	0.07743	0.07393	-0.06254	-0.17629	-0.19669	-0.1645	0.02056
0.0662	0.00155	0.02672	0.06836	0.05641	0.03242	0.08476	0.04977	-0.12123	-0.16797	-0.07614	-0.04857	-0.07725	-0.09408	-0.14729	-0.28821	-0.32437	-0.14564	-0.06897	-0.10172	0.000788332	0.08492	0.06257	0.05278	0.06579	0.10069	0.10971	0.05483	-0.0054	0.03805	0.18644	0.25873	0.2139	0.1333	0.14475	0.22142	0.23794	0.11421	0.03433	0.08685	0.10361	0.0643	0.04568	0.08188	0.0814	-0.05944	-0.18105	-0.20157	-0.16312	0.02705
0.06644	0.00145	0.02751	0.07074	0.05804	0.03031	0.08109	0.05055	-0.11601	-0.1628	-0.07629	-0.05258	-0.08027	-0.09381	-0.14244	-0.28266	-0.32219	-0.14642	-0.07042	-0.10335	-0.000562146	0.08547	0.06521	0.05562	0.06521	0.09557	0.10038	0.04384	-0.01077	0.03803	0.18413	0.25317	0.21137	0.13906	0.1563	0.23137	0.24242	0.11544	0.03107	0.07999	0.10341	0.07108	0.05047	0.08642	0.08891	-0.05615	-0.18557	-0.20643	-0.16199	0.03317
0.06668	0.00126	0.02818	0.07319	0.05986	0.02831	0.07726	0.0509	-0.11095	-0.15737	-0.07628	-0.05657	-0.08327	-0.09343	-0.13707	-0.27605	-0.319	-0.14687	-0.07209	-0.10534	-0.00203	0.08614	0.0678	0.0582	0.06426	0.08993	0.09057	0.03278	-0.01572	0.03843	0.18174	0.24725	0.20835	0.14426	0.16737	0.24114	0.24711	0.11715	0.02811	0.07314	0.10331	0.07816	0.05552	0.091	0.09641	-0.05269	-0.1898	-0.21123	-0.16115	0.03889
0.06693	0.000952799	0.02872	0.07565	0.06188	0.02649	0.07331	0.0508	-0.10613	-0.15177	-0.07614	-0.06053	-0.08622	-0.09289	-0.13116	-0.26841	-0.31484	-0.14699	-0.07396	-0.10767	-0.00362	0.08697	0.07036	0.06052	0.06296	0.0838	0.08034	0.02169	-0.02021	0.03928	0.17929	0.24102	0.20486	0.14887	0.17791	0.25069	0.25202	0.11932	0.02546	0.06629	0.10327	0.08545	0.06076	0.09558	0.10381	-0.04909	-0.1937	-0.21594	-0.1606	0.04417
0.06717	0.000543567	0.02909	0.0781	0.06409	0.02489	0.0693	0.05023	-0.10163	-0.14608	-0.0759	-0.06447	-0.0891	-0.09215	-0.12469	-0.25974	-0.30971	-0.1468	-0.07605	-0.11035	-0.00529	0.08797	0.0729	0.06257	0.0613	0.07719	0.06972	0.01061	-0.02421	0.04057	0.1768	0.23451	0.20091	0.15287	0.18788	0.25998	0.25711	0.12195	0.0231	0.05944	0.10325	0.09288	0.06615	0.10013	0.11107	-0.04537	-0.19723	-0.22053	-0.16036	0.049
0.06741	2.51624e-05	0.02928	0.08049	0.06648	0.02358	0.06528	0.04919	-0.0975	-0.14039	-0.07561	-0.06838	-0.09189	-0.09117	-0.11766	-0.25006	-0.30366	-0.14631	-0.07834	-0.11334	-0.00706	0.08916	0.07543	0.06435	0.05928	0.07014	0.05877	-0.000392703	-0.0277	0.04232	0.17431	0.22776	0.19652	0.15624	0.19723	0.26899	0.26238	0.12503	0.02103	0.05259	0.1032	0.10038	0.07164	0.1046	0.11812	-0.04156	-0.20036	-0.22497	-0.16044	0.05335
0.06765	-0.00060424	0.02926	0.08277	0.06904	0.02259	0.06131	0.04766	-0.09383	-0.13476	-0.07528	-0.07226	-0.09458	-0.08994	-0.11005	-0.23942	-0.29673	-0.14553	-0.08082	-0.11664	-0.00889	0.09054	0.07798	0.06587	0.05693	0.06268	0.04753	-0.01127	-0.03063	0.04452	0.17184	0.22082	0.19174	0.15898	0.20592	0.27767	0.26781	0.12853	0.01923	0.04575	0.10309	0.10788	0.07719	0.10896	0.1249	-0.03768	-0.20306	-0.22922	-0.16084	0.05722
0.0679	-0.00135	0.02901	0.08489	0.07174	0.02197	0.05743	0.04566	-0.09064	-0.12928	-0.07496	-0.07611	-0.09715	-0.08842	-0.10186	-0.22785	-0.28897	-0.14448	-0.08346	-0.12021	-0.01077	0.09212	0.08054	0.06713	0.05425	0.05484	0.03606	-0.02197	-0.033	0.04718	0.1694	0.21372	0.18657	0.16107	0.21392	0.28598	0.27337	0.13244	0.0177	0.03889	0.10287	0.11529	0.08275	0.11317	0.13136	-0.03376	-0.20529	-0.23326	-0.16156	0.0606
0.06814	-0.0022	0.0285	0.08681	0.07457	0.02174	0.05369	0.04318	-0.08801	-0.124	-0.07467	-0.07992	-0.09958	-0.08658	-0.09311	-0.21541	-0.28044	-0.14319	-0.08626	-0.12401	-0.01269	0.09392	0.08312	0.06813	0.05126	0.04666	0.02441	-0.03244	-0.03477	0.0503	0.16702	0.20652	0.18106	0.1625	0.2212	0.29389	0.27905	0.13674	0.01643	0.03204	0.10251	0.12254	0.08827	0.11721	0.13745	-0.02982	-0.20702	-0.23704	-0.16259	0.06347
0.06838	-0.00317	0.02773	0.08849	0.0775	0.02191	0.05012	0.04025	-0.08596	-0.11899	-0.07443	-0.08367	-0.10185	-0.08442	-0.08379	-0.20216	-0.27122	-0.14167	-0.08917	-0.12802	-0.01463	0.09591	0.08573	0.06887	0.04795	0.03818	0.01266	-0.04261	-0.03593	0.05384	0.16471	0.19926	0.17523	0.16327	0.22772	0.30138	0.28482	0.14141	0.0154	0.0252	0.10197	0.12956	0.0937	0.12104	0.14313	-0.02589	-0.20824	-0.24054	-0.16393	0.06584
0.06862	-0.00425	0.02668	0.08989	0.08049	0.02251	0.04677	0.03689	-0.08451	-0.11431	-0.07426	-0.08736	-0.10396	-0.08192	-0.07394	-0.18817	-0.26139	-0.13995	-0.09218	-0.13218	-0.01658	0.09811	0.08837	0.06936	0.04437	0.02946	0.000843165	-0.05243	-0.03648	0.05781	0.1625	0.19198	0.16912	0.16339	0.23348	0.3084	0.29066	0.14642	0.0146	0.01835	0.10122	0.13628	0.099	0.12465	0.14836	-0.02198	-0.20892	-0.24374	-0.16558	0.06771
0.06887	-0.00544	0.02534	0.09096	0.08351	0.02354	0.04366	0.03311	-0.08369	-0.11	-0.07418	-0.09098	-0.10589	-0.07906	-0.06358	-0.17352	-0.25102	-0.13805	-0.09525	-0.13645	-0.01852	0.1005	0.09103	0.0696	0.04051	0.02052	-0.01096	-0.06186	-0.03639	0.06218	0.16038	0.18473	0.16276	0.16287	0.23844	0.31494	0.29654	0.15175	0.01402	0.01152	0.10023	0.14264	0.10411	0.128	0.1531	-0.01812	-0.20906	-0.24661	-0.16751	0.06908
0.06911	-0.00672	0.0237	0.09167	0.08652	0.02497	0.04082	0.02894	-0.0835	-0.1061	-0.0742	-0.09452	-0.10763	-0.07585	-0.05273	-0.15829	-0.24019	-0.13599	-0.09834	-0.14078	-0.02042	0.10308	0.09372	0.06959	0.03641	0.01143	-0.02271	-0.07084	-0.03567	0.06691	0.15837	0.17754	0.15619	0.16171	0.24261	0.32097	0.30245	0.15738	0.01365	0.0047	0.09897	0.14856	0.109	0.13107	0.15734	-0.01432	-0.20865	-0.24913	-0.16973	0.06997
0.06935	-0.00811	0.02177	0.092	0.08948	0.02681	0.03828	0.02444	-0.08394	-0.10264	-0.07433	-0.09795	-0.10916	-0.07229	-0.04145	-0.14258	-0.22902	-0.13379	-0.10142	-0.14512	-0.02227	0.10583	0.09643	0.06935	0.03207	0.00221	-0.03433	-0.07933	-0.03434	0.07197	0.15647	0.17045	0.14943	0.15992	0.24596	0.32648	0.30836	0.16329	0.01348	-0.0021	0.09741	0.15401	0.11362	0.13386	0.16105	-0.01061	-0.20768	-0.25129	-0.17221	0.07038
0.06959	-0.00958	0.01955	0.09192	0.09234	0.02904	0.03605	0.01962	-0.085	-0.09964	-0.07458	-0.10127	-0.11049	-0.06839	-0.02978	-0.12648	-0.21758	-0.13149	-0.10445	-0.14942	-0.02405	0.10874	0.09915	0.06888	0.02753	-0.00707	-0.04578	-0.0873	-0.03239	0.07733	0.15469	0.16351	0.14253	0.15754	0.24852	0.33144	0.31426	0.16946	0.0135	-0.00888	0.09553	0.15891	0.11793	0.13634	0.1642	-0.007	-0.20615	-0.25307	-0.17493	0.07034
0.06984	-0.01113	0.01704	0.0914	0.09507	0.0316	0.03413	0.01454	-0.08666	-0.09713	-0.07494	-0.10445	-0.11159	-0.06415	-0.01777	-0.1101	-0.20597	-0.1291	-0.10739	-0.15362	-0.02573	0.11179	0.10187	0.06818	0.02281	-0.01638	-0.05701	-0.0947	-0.02985	0.08293	0.15301	0.15675	0.13551	0.15457	0.25026	0.33584	0.32011	0.17585	0.0137	-0.01562	0.09333	0.16323	0.1219	0.13849	0.1668	-0.0035	-0.20408	-0.25448	-0.17788	0.06988
0.07008	-0.01274	0.01427	0.09045	0.09761	0.03449	0.03255	0.00923	-0.08887	-0.09509	-0.07541	-0.10748	-0.11247	-0.05961	-0.00548	-0.09355	-0.1943	-0.12665	-0.1102	-0.15766	-0.02729	0.11498	0.10459	0.06726	0.01792	-0.02568	-0.06795	-0.10151	-0.02675	0.08874	0.15145	0.15019	0.12841	0.15104	0.25122	0.33968	0.3259	0.18244	0.01406	-0.02233	0.09077	0.16692	0.12548	0.14031	0.16884	-0.000135542	-0.20149	-0.2555	-0.18103	0.06903
0.07032	-0.0144	0.01125	0.08904	0.09994	0.03764	0.03129	0.00376	-0.09162	-0.09353	-0.07598	-0.11034	-0.11312	-0.05478	0.00702	-0.07693	-0.18265	-0.12416	-0.11286	-0.16151	-0.02872	0.11827	0.10729	0.06613	0.01289	-0.03492	-0.07857	-0.10771	-0.0231	0.09469	0.14999	0.14386	0.12127	0.14697	0.25139	0.34295	0.33161	0.18921	0.01457	-0.029	0.08786	0.16995	0.12864	0.14178	0.17032	0.00309	-0.19838	-0.25615	-0.18435	0.06781
0.07056	-0.01609	0.00801	0.08719	0.10201	0.04102	0.03035	-0.00184	-0.09485	-0.09244	-0.07665	-0.11302	-0.11354	-0.04968	0.01965	-0.06034	-0.17111	-0.12164	-0.11531	-0.1651	-0.02998	0.12165	0.10996	0.0648	0.00774	-0.04405	-0.08883	-0.11327	-0.01895	0.10075	0.14862	0.13781	0.11412	0.14241	0.2508	0.34563	0.33721	0.19611	0.0152	-0.03562	0.08458	0.17229	0.13135	0.14291	0.17124	0.00617	-0.19479	-0.25641	-0.18782	0.06628
0.07081	-0.0178	0.00457	0.08489	0.10378	0.04458	0.02972	-0.00752	-0.0985	-0.0918	-0.0774	-0.1155	-0.11373	-0.04436	0.03236	-0.04391	-0.15977	-0.11911	-0.11754	-0.16839	-0.03106	0.12512	0.11259	0.06327	0.00249	-0.05305	-0.09868	-0.11818	-0.01433	0.10686	0.14734	0.13204	0.10699	0.13739	0.24948	0.34774	0.34267	0.20311	0.01595	-0.0422	0.08093	0.17391	0.1336	0.14369	0.17162	0.00909	-0.19075	-0.25632	-0.1914	0.06447
0.07105	-0.01952	0.00096093	0.08217	0.10524	0.04827	0.02939	-0.01322	-0.10253	-0.09158	-0.07821	-0.11777	-0.11369	-0.03885	0.04505	-0.02774	-0.14872	-0.11658	-0.11951	-0.17135	-0.03194	0.12864	0.11517	0.06155	-0.00284	-0.06188	-0.10809	-0.12243	-0.00929	0.11296	0.14614	0.12659	0.09991	0.13193	0.24744	0.34927	0.34798	0.21017	0.01679	-0.04872	0.07691	0.1748	0.13535	0.14411	0.17148	0.01186	-0.18628	-0.25587	-0.19507	0.06243
0.07129	-0.02122	-0.00278	0.07903	0.10634	0.05204	0.02936	-0.0189	-0.10687	-0.09177	-0.07908	-0.11981	-0.11343	-0.03317	0.05766	-0.01193	-0.13802	-0.11406	-0.12118	-0.17393	-0.0326	0.1322	0.11767	0.05965	-0.00823	-0.0705	-0.11703	-0.12603	-0.00388	0.119	0.14501	0.12146	0.09291	0.12609	0.24471	0.35022	0.35309	0.21727	0.01771	-0.05519	0.0725	0.17494	0.13658	0.14418	0.17084	0.01445	-0.18143	-0.25509	-0.19879	0.0602
0.07153	-0.0229	-0.00661	0.07551	0.10708	0.05584	0.02959	-0.02452	-0.11146	-0.09231	-0.07999	-0.12161	-0.11295	-0.02739	0.0701	0.00342	-0.12775	-0.11156	-0.12254	-0.1761	-0.03302	0.13578	0.12009	0.05757	-0.01367	-0.07889	-0.12548	-0.12897	0.00185	0.12493	0.14394	0.11667	0.08603	0.11989	0.24134	0.3506	0.35799	0.22434	0.01868	-0.06161	0.06773	0.17434	0.13728	0.14389	0.16972	0.01689	-0.17624	-0.254	-0.20253	0.05781
0.07177	-0.02452	-0.01051	0.07164	0.10743	0.05963	0.03007	-0.03001	-0.11624	-0.09319	-0.08091	-0.12316	-0.11225	-0.02152	0.08229	0.01821	-0.11797	-0.10907	-0.12356	-0.17785	-0.03321	0.13937	0.12241	0.05533	-0.01913	-0.08702	-0.13341	-0.13127	0.00786	0.13069	0.14291	0.11224	0.07928	0.11338	0.23736	0.35042	0.36264	0.23137	0.01968	-0.06797	0.06259	0.17297	0.13744	0.14325	0.16815	0.01917	-0.17074	-0.25263	-0.20628	0.05532
0.07202	-0.02607	-0.01441	0.06746	0.10739	0.06335	0.03077	-0.03536	-0.12116	-0.09436	-0.08184	-0.12446	-0.11135	-0.01561	0.09417	0.03234	-0.10873	-0.10661	-0.12422	-0.17915	-0.03314	0.14294	0.12462	0.05293	-0.02461	-0.09487	-0.14082	-0.13295	0.01408	0.13623	0.1419	0.10814	0.07268	0.1066	0.23281	0.34969	0.36702	0.2383	0.0207	-0.07426	0.0571	0.17086	0.13703	0.14227	0.16617	0.02129	-0.16497	-0.25099	-0.20999	0.05276
0.07226	-0.02754	-0.01829	0.06302	0.10697	0.06697	0.03168	-0.04051	-0.12615	-0.09578	-0.08275	-0.1255	-0.11025	-0.00971	0.10566	0.04574	-0.10009	-0.10415	-0.12452	-0.17999	-0.03282	0.14648	0.1267	0.05037	-0.03008	-0.10241	-0.14768	-0.13401	0.02045	0.14151	0.14089	0.10439	0.06625	0.09958	0.22772	0.3484	0.3711	0.2451	0.02172	-0.0805	0.05126	0.168	0.13605	0.14093	0.1638	0.02326	-0.15899	-0.24912	-0.21365	0.05017
0.0725	-0.02891	-0.02209	0.05835	0.10615	0.07045	0.03277	-0.04545	-0.13115	-0.09742	-0.08363	-0.12628	-0.10896	-0.00384	0.11668	0.05832	-0.09208	-0.10171	-0.12442	-0.18036	-0.03224	0.14996	0.12864	0.04767	-0.03553	-0.10963	-0.15399	-0.13448	0.02694	0.14647	0.13986	0.10097	0.06001	0.09239	0.22213	0.34658	0.37485	0.25172	0.02272	-0.08666	0.04509	0.16441	0.1345	0.13925	0.16109	0.0251	-0.15284	-0.24706	-0.21724	0.04758
0.07274	-0.03017	-0.02577	0.05353	0.10496	0.07374	0.034	-0.05013	-0.13613	-0.09924	-0.08447	-0.1268	-0.10751	0.00196	0.1272	0.07003	-0.08474	-0.09927	-0.12394	-0.18027	-0.03141	0.15337	0.13042	0.04484	-0.04096	-0.11652	-0.15975	-0.13439	0.03347	0.15107	0.13879	0.09785	0.05398	0.08505	0.2161	0.34424	0.37825	0.25813	0.02367	-0.09275	0.0386	0.1601	0.13236	0.13723	0.15807	0.0268	-0.14655	-0.24483	-0.22073	0.04502
0.07299	-0.03129	-0.0293	0.04859	0.1034	0.07681	0.03536	-0.05455	-0.14102	-0.10119	-0.08525	-0.12706	-0.1059	0.00764	0.13713	0.0808	-0.07807	-0.09683	-0.12307	-0.17973	-0.03034	0.15669	0.13203	0.04188	-0.04635	-0.12307	-0.16497	-0.13377	0.03999	0.15529	0.13766	0.09504	0.04816	0.07761	0.20966	0.34138	0.38125	0.26429	0.02457	-0.09876	0.03182	0.1551	0.12964	0.13487	0.15477	0.02839	-0.14018	-0.24247	-0.2241	0.04253
0.07323	-0.03228	-0.03263	0.04359	0.10149	0.07964	0.03682	-0.05867	-0.14579	-0.10325	-0.08596	-0.12709	-0.10415	0.01319	0.14645	0.09058	-0.07211	-0.09437	-0.1218	-0.17874	-0.02904	0.15989	0.13346	0.0388	-0.05168	-0.12926	-0.16963	-0.13266	0.04646	0.15907	0.13644	0.09249	0.04258	0.07011	0.20286	0.33801	0.38384	0.27016	0.02539	-0.10469	0.02477	0.14943	0.12635	0.13219	0.15124	0.02987	-0.13376	-0.24002	-0.22734	0.04013
0.07347	-0.03311	-0.03573	0.03859	0.09926	0.0822	0.03836	-0.0625	-0.15041	-0.10538	-0.08659	-0.12688	-0.10228	0.01856	0.1551	0.09934	-0.06684	-0.09187	-0.12016	-0.17734	-0.02753	0.16297	0.13471	0.03562	-0.05694	-0.1351	-0.17376	-0.13109	0.05283	0.16241	0.13511	0.09019	0.03723	0.06261	0.19574	0.33414	0.38598	0.27569	0.02612	-0.11053	0.01747	0.14311	0.12248	0.12918	0.1475	0.03126	-0.12733	-0.23749	-0.23042	0.03786
0.07371	-0.03378	-0.03856	0.03364	0.09674	0.08448	0.03994	-0.06603	-0.15485	-0.10756	-0.08714	-0.12645	-0.1003	0.02375	0.16306	0.10707	-0.06225	-0.08933	-0.11814	-0.17556	-0.02583	0.16591	0.13577	0.03236	-0.06212	-0.14058	-0.17736	-0.1291	0.05903	0.16526	0.13366	0.08811	0.03213	0.05514	0.18833	0.32978	0.38763	0.28085	0.02675	-0.11627	0.00995	0.13621	0.11806	0.12585	0.14359	0.03257	-0.12093	-0.23493	-0.23334	0.03572
0.07396	-0.03428	-0.0411	0.02878	0.09394	0.08646	0.04154	-0.06926	-0.15909	-0.10976	-0.08759	-0.12581	-0.09824	0.02871	0.17029	0.11374	-0.05834	-0.08672	-0.11576	-0.17342	-0.02396	0.16871	0.13665	0.02903	-0.06719	-0.14569	-0.18046	-0.12673	0.06504	0.16763	0.13206	0.08622	0.02729	0.04775	0.18069	0.32493	0.38876	0.28559	0.02726	-0.1219	0.00225	0.12874	0.11311	0.12223	0.13955	0.03382	-0.11459	-0.23237	-0.23607	0.03375
0.0742	-0.03461	-0.04332	0.02408	0.09091	0.08812	0.04313	-0.07219	-0.1631	-0.11195	-0.08796	-0.12499	-0.09611	0.03345	0.17679	0.11936	-0.05506	-0.08403	-0.11304	-0.17096	-0.02195	0.17133	0.13735	0.02566	-0.07215	-0.15043	-0.18306	-0.12404	0.07081	0.16949	0.1303	0.08448	0.02272	0.04049	0.17285	0.31959	0.38934	0.28987	0.02764	-0.12741	-0.0056	0.12076	0.10766	0.11832	0.1354	0.03501	-0.10835	-0.22982	-0.23861	0.03196
0.07444	-0.03477	-0.04519	0.01957	0.08768	0.08948	0.0447	-0.07484	-0.1669	-0.11413	-0.08823	-0.12399	-0.09393	0.03793	0.18256	0.12393	-0.0524	-0.08123	-0.11001	-0.16825	-0.01983	0.17379	0.13788	0.02228	-0.07698	-0.1548	-0.18518	-0.12105	0.0763	0.17083	0.12835	0.08287	0.01841	0.03339	0.16485	0.31377	0.38933	0.29367	0.02788	-0.13278	-0.01356	0.11233	0.10173	0.11414	0.13119	0.03618	-0.10221	-0.22731	-0.24095	0.03035
0.07468	-0.03475	-0.04671	0.01529	0.08429	0.09052	0.04621	-0.07723	-0.17046	-0.11629	-0.08841	-0.12283	-0.09173	0.04215	0.18758	0.12748	-0.05031	-0.07831	-0.10669	-0.16533	-0.01764	0.17607	0.13826	0.01892	-0.08163	-0.1588	-0.18685	-0.11782	0.08148	0.17166	0.12621	0.08135	0.01437	0.02648	0.15671	0.30747	0.38869	0.29693	0.02798	-0.13798	-0.02158	0.1035	0.09536	0.10972	0.12695	0.03733	-0.0962	-0.22485	-0.24306	0.02893
0.07493	-0.03456	-0.04786	0.01129	0.08076	0.09125	0.04765	-0.07936	-0.17379	-0.1184	-0.0885	-0.12153	-0.08951	0.04611	0.19189	0.13005	-0.04874	-0.07525	-0.10312	-0.16226	-0.01542	0.17816	0.13849	0.01561	-0.08611	-0.16241	-0.18808	-0.1144	0.08632	0.17198	0.12385	0.07988	0.01059	0.01981	0.14847	0.30069	0.3874	0.29962	0.02791	-0.14301	-0.02962	0.09434	0.08861	0.10507	0.12269	0.03847	-0.09033	-0.22245	-0.24496	0.02772
0.07517	-0.03419	-0.04862	0.00761	0.07715	0.09167	0.049	-0.08127	-0.1769	-0.12047	-0.0885	-0.12011	-0.08731	0.0498	0.19549	0.13169	-0.04763	-0.07203	-0.09932	-0.1591	-0.01321	0.18006	0.13859	0.01238	-0.09038	-0.16565	-0.1889	-0.11081	0.09079	0.1718	0.12127	0.07841	0.00706	0.01338	0.14015	0.29342	0.38543	0.30172	0.02768	-0.14784	-0.03763	0.0849	0.08152	0.10022	0.11846	0.03963	-0.08461	-0.22011	-0.24662	0.02671
0.07541	-0.03366	-0.049	0.00427	0.07348	0.09179	0.05023	-0.08296	-0.17979	-0.1225	-0.08842	-0.11858	-0.08512	0.05323	0.19843	0.13243	-0.04692	-0.06862	-0.09533	-0.15592	-0.01106	0.18176	0.13859	0.00926	-0.09441	-0.16851	-0.18933	-0.10711	0.09488	0.17113	0.11845	0.07693	0.00379	0.00723	0.13177	0.28568	0.38275	0.30319	0.02728	-0.15246	-0.04557	0.07526	0.07414	0.09521	0.11426	0.04082	-0.07904	-0.21785	-0.24803	0.02591
0.07565	-0.03297	-0.04899	0.0013	0.06979	0.09163	0.05133	-0.08447	-0.18247	-0.12448	-0.08827	-0.11697	-0.08297	0.05639	0.20074	0.13236	-0.04656	-0.06502	-0.09119	-0.15277	-0.009	0.18325	0.13849	0.00628	-0.09819	-0.17099	-0.18939	-0.10333	0.09858	0.16997	0.11539	0.07538	0.000744627	0.00138	0.12336	0.27745	0.37934	0.30402	0.0267	-0.15684	-0.05339	0.06547	0.06654	0.09005	0.11013	0.04204	-0.07363	-0.21566	-0.24921	0.02531
0.0759	-0.03212	-0.0486	-0.00128	0.0661	0.09118	0.05228	-0.08582	-0.18495	-0.12641	-0.08805	-0.11529	-0.08088	0.05931	0.20247	0.13155	-0.04647	-0.0612	-0.08695	-0.14974	-0.00709	0.18453	0.13832	0.00349	-0.10169	-0.17308	-0.18909	-0.09951	0.10187	0.16837	0.11207	0.07373	-0.00207	-0.00417	0.11493	0.26875	0.37519	0.30417	0.02595	-0.16097	-0.06106	0.05562	0.05878	0.08479	0.10607	0.04331	-0.06836	-0.21353	-0.25012	0.02491
0.07614	-0.03112	-0.04783	-0.00346	0.06244	0.09045	0.05307	-0.08703	-0.18725	-0.12829	-0.08777	-0.11355	-0.07885	0.062	0.20366	0.13007	-0.04657	-0.05716	-0.08264	-0.14688	-0.00537	0.1856	0.1381	0.000900907	-0.10488	-0.17479	-0.18847	-0.09569	0.10476	0.16634	0.1085	0.07195	-0.00468	-0.00941	0.10649	0.25959	0.37028	0.30365	0.02502	-0.16483	-0.06851	0.04577	0.05092	0.07946	0.1021	0.04462	-0.06324	-0.21145	-0.25078	0.0247
0.07638	-0.02999	-0.04669	-0.00524	0.05882	0.08947	0.05368	-0.08811	-0.18936	-0.13012	-0.08743	-0.11178	-0.0769	0.06447	0.20439	0.128	-0.04681	-0.05288	-0.0783	-0.14426	-0.00388	0.18644	0.13784	-0.00145	-0.10774	-0.17612	-0.18755	-0.0919	0.10724	0.1639	0.10468	0.07003	-0.00709	-0.01433	0.09807	0.24996	0.36462	0.30243	0.02391	-0.16841	-0.07572	0.03598	0.04304	0.07409	0.09823	0.04599	-0.05826	-0.2094	-0.25117	0.02469
0.07662	-0.02873	-0.0452	-0.0066	0.05528	0.08822	0.0541	-0.0891	-0.1913	-0.1319	-0.08705	-0.10999	-0.07505	0.06674	0.2047	0.12544	-0.04712	-0.04835	-0.07397	-0.14193	-0.00266	0.18707	0.13756	-0.00355	-0.11026	-0.17706	-0.18636	-0.08817	0.10931	0.1611	0.10061	0.06792	-0.00932	-0.01892	0.08966	0.23989	0.3582	0.30052	0.02262	-0.17167	-0.08264	0.02634	0.03521	0.06871	0.09446	0.04741	-0.0534	-0.20737	-0.25128	0.02485
0.07687	-0.02736	-0.04338	-0.00756	0.05181	0.08672	0.05431	-0.09	-0.19307	-0.13362	-0.08661	-0.10819	-0.07329	0.06883	0.20466	0.12248	-0.04741	-0.04358	-0.06971	-0.13995	-0.00175	0.18746	0.13728	-0.00536	-0.1124	-0.17761	-0.18491	-0.08456	0.11097	0.15795	0.09631	0.06563	-0.01138	-0.02318	0.08129	0.22939	0.35104	0.29792	0.02117	-0.17462	-0.08922	0.0169	0.02749	0.06337	0.0908	0.04888	-0.04865	-0.20534	-0.25111	0.0252
0.07711	-0.02589	-0.04125	-0.00812	0.04842	0.08497	0.05431	-0.09083	-0.19469	-0.13529	-0.08614	-0.1064	-0.07164	0.07077	0.20434	0.11919	-0.04764	-0.03857	-0.06555	-0.13839	-0.00118	0.18763	0.137	-0.00686	-0.11415	-0.17778	-0.18323	-0.08107	0.11223	0.15449	0.09178	0.06313	-0.01329	-0.02712	0.07296	0.21847	0.34314	0.29463	0.01955	-0.17722	-0.09543	0.00775	0.01996	0.05809	0.08724	0.05038	-0.044	-0.20327	-0.25066	0.02571
0.07735	-0.02432	-0.03882	-0.0083	0.04512	0.08298	0.05409	-0.09162	-0.19614	-0.1369	-0.08563	-0.10462	-0.07011	0.07258	0.20382	0.11569	-0.04774	-0.03332	-0.06153	-0.13727	-0.000991756	0.18756	0.13674	-0.00805	-0.1155	-0.17756	-0.18135	-0.07777	0.11309	0.15075	0.08703	0.06042	-0.01505	-0.03075	0.06468	0.20717	0.33454	0.29068	0.01778	-0.17947	-0.10122	-0.00107	0.01269	0.05291	0.08377	0.05192	-0.03944	-0.20114	-0.24991	0.02637
0.07759	-0.02267	-0.03612	-0.00811	0.04192	0.08074	0.05362	-0.09237	-0.19745	-0.13845	-0.08508	-0.10288	-0.0687	0.0743	0.20315	0.11205	-0.04766	-0.02785	-0.0577	-0.13666	-0.00121	0.18726	0.13651	-0.00891	-0.11643	-0.17697	-0.17931	-0.07467	0.11356	0.14677	0.0821	0.05749	-0.01669	-0.03407	0.05647	0.19551	0.32526	0.28608	0.01587	-0.18134	-0.10656	-0.00947	0.00575	0.04787	0.0804	0.05348	-0.03495	-0.19894	-0.24886	0.02717
0.07784	-0.02096	-0.03318	-0.00756	0.0388	0.07824	0.05289	-0.0931	-0.19861	-0.13992	-0.08451	-0.10117	-0.06742	0.07595	0.2024	0.10836	-0.04734	-0.02217	-0.05409	-0.13657	-0.00185	0.18673	0.13631	-0.00943	-0.11693	-0.17599	-0.17711	-0.07182	0.11363	0.14257	0.07698	0.05434	-0.01822	-0.0371	0.04833	0.18353	0.31534	0.28087	0.01384	-0.18282	-0.11141	-0.0174	-0.000806254	0.04298	0.07711	0.05504	-0.03053	-0.19662	-0.2475	0.02809
0.07808	-0.01919	-0.03002	-0.00669	0.03576	0.07549	0.05191	-0.09381	-0.1996	-0.14133	-0.08391	-0.09952	-0.06625	0.07756	0.20165	0.10471	-0.04674	-0.0163	-0.05074	-0.13704	-0.00294	0.18595	0.13615	-0.00961	-0.117	-0.17464	-0.1748	-0.06923	0.11334	0.13819	0.07172	0.05097	-0.01966	-0.03985	0.04028	0.17126	0.30483	0.27507	0.0117	-0.1839	-0.11574	-0.02481	-0.00691	0.03829	0.07389	0.05659	-0.02615	-0.19417	-0.24584	0.02913
0.07832	-0.01737	-0.02665	-0.00551	0.03279	0.07246	0.05064	-0.09451	-0.20044	-0.14265	-0.08328	-0.09792	-0.06521	0.07916	0.20096	0.10118	-0.04582	-0.01027	-0.04769	-0.13808	-0.00448	0.18494	0.13602	-0.00945	-0.11663	-0.17293	-0.17239	-0.06695	0.11267	0.13367	0.06633	0.0474	-0.02102	-0.04234	0.03231	0.15875	0.29378	0.26872	0.00948	-0.18456	-0.11952	-0.03165	-0.01249	0.03381	0.07072	0.05811	-0.02183	-0.19155	-0.24386	0.03025
0.07856	-0.0155	-0.02309	-0.00404	0.02987	0.06916	0.04909	-0.0952	-0.20111	-0.14389	-0.08264	-0.09638	-0.06429	0.08078	0.20039	0.09785	-0.04455	-0.0041	-0.04495	-0.13971	-0.00648	0.18368	0.13592	-0.00898	-0.11582	-0.17086	-0.16992	-0.06499	0.11164	0.12903	0.06084	0.04362	-0.02232	-0.04459	0.02445	0.14604	0.28224	0.26187	0.00719	-0.18478	-0.12273	-0.03786	-0.01753	0.02956	0.06759	0.05956	-0.01754	-0.18874	-0.24158	0.03144
0.07881	-0.01361	-0.01937	-0.00231	0.02698	0.06555	0.04724	-0.09587	-0.20159	-0.14504	-0.08197	-0.09491	-0.06348	0.08244	0.2	0.09478	-0.04289	0.00219	-0.04256	-0.14193	-0.00893	0.18219	0.13584	-0.00819	-0.11459	-0.16845	-0.16741	-0.06338	0.11027	0.1243	0.05527	0.03966	-0.02358	-0.04663	0.0167	0.13318	0.27028	0.25457	0.00486	-0.18457	-0.12535	-0.04341	-0.02196	0.02556	0.06448	0.06092	-0.0133	-0.18573	-0.23898	0.03269
0.07905	-0.01168	-0.0155	-0.000340723	0.02412	0.06164	0.04507	-0.09653	-0.20189	-0.14608	-0.08129	-0.09351	-0.06279	0.08419	0.19983	0.09204	-0.04083	0.00857	-0.04053	-0.14473	-0.01183	0.18045	0.13577	-0.00712	-0.11295	-0.16572	-0.16488	-0.06214	0.10857	0.11952	0.04966	0.03553	-0.02482	-0.04847	0.00906	0.12022	0.25798	0.24688	0.00252	-0.1839	-0.12736	-0.04827	-0.02576	0.02183	0.06136	0.06216	-0.00911	-0.1825	-0.23608	0.03396
0.07929	-0.00972	-0.01149	0.00185	0.02125	0.05738	0.04258	-0.09717	-0.20198	-0.14701	-0.08059	-0.09218	-0.06219	0.08604	0.19994	0.08968	-0.03835	0.015	-0.03888	-0.14809	-0.01517	0.17848	0.1357	-0.00578	-0.11093	-0.16268	-0.16236	-0.06127	0.10655	0.11472	0.04403	0.03124	-0.02606	-0.05016	0.00155	0.10723	0.2454	0.23884	0.000181587	-0.18277	-0.12875	-0.05241	-0.02891	0.01837	0.05821	0.06325	-0.00496	-0.17902	-0.23288	0.03524
0.07953	-0.00773	-0.00735	0.00423	0.01836	0.05278	0.03975	-0.09779	-0.20186	-0.14781	-0.07987	-0.09092	-0.06168	0.08801	0.20036	0.08773	-0.03544	0.02146	-0.03762	-0.15199	-0.01892	0.17626	0.1356	-0.00422	-0.10853	-0.15935	-0.15987	-0.06079	0.10425	0.10992	0.03843	0.02683	-0.0273	-0.0517	-0.00582	0.09426	0.23262	0.23053	-0.00212	-0.18118	-0.12951	-0.05583	-0.03138	0.01518	0.05501	0.06415	-0.000881439	-0.1753	-0.2294	0.03649
0.07978	-0.00572	-0.00309	0.00678	0.01542	0.04781	0.03658	-0.09838	-0.2015	-0.14849	-0.07914	-0.08974	-0.06125	0.09014	0.20112	0.08625	-0.0321	0.02791	-0.03676	-0.15641	-0.02306	0.17381	0.13545	-0.00247	-0.1058	-0.15576	-0.15742	-0.06069	0.10166	0.10515	0.03287	0.02231	-0.02857	-0.05313	-0.01304	0.08137	0.21973	0.222	-0.00435	-0.17913	-0.12964	-0.0585	-0.03317	0.01227	0.05174	0.06484	0.00313	-0.17131	-0.22563	0.0377
0.08002	-0.00368	0.00128	0.00948	0.01241	0.04244	0.03305	-0.09892	-0.20089	-0.14901	-0.07838	-0.08863	-0.06088	0.09243	0.20224	0.08525	-0.02835	0.03433	-0.0363	-0.16131	-0.02756	0.17113	0.13524	-0.000573216	-0.10277	-0.15194	-0.15503	-0.06099	0.09882	0.10044	0.0274	0.0177	-0.02988	-0.05447	-0.02009	0.06863	0.20681	0.21333	-0.00649	-0.17661	-0.12915	-0.06044	-0.03429	0.00963	0.04839	0.06528	0.00705	-0.16707	-0.2216	0.03882
0.08026	-0.00161	0.00574	0.01231	0.00931	0.03666	0.02915	-0.09943	-0.20003	-0.14938	-0.0776	-0.08758	-0.06056	0.0949	0.20373	0.08474	-0.02419	0.04066	-0.03623	-0.16664	-0.03239	0.16823	0.13494	0.00143	-0.09947	-0.1479	-0.15273	-0.06169	0.09573	0.09581	0.02204	0.01305	-0.03123	-0.05574	-0.02696	0.05611	0.19394	0.20457	-0.00852	-0.17363	-0.12803	-0.06165	-0.03475	0.00726	0.04493	0.06544	0.01088	-0.16256	-0.21733	0.03983
0.0805	0.000494126	0.0103	0.01523	0.0061	0.03046	0.02489	-0.09987	-0.19888	-0.14958	-0.0768	-0.0866	-0.06028	0.09758	0.20562	0.08474	-0.01964	0.04689	-0.03657	-0.17236	-0.0375	0.1651	0.13452	0.00349	-0.09594	-0.14367	-0.15051	-0.06277	0.09242	0.09128	0.01683	0.00837	-0.03264	-0.05696	-0.03364	0.04386	0.18122	0.1958	-0.0104	-0.1702	-0.12632	-0.06215	-0.03456	0.00513	0.04135	0.06531	0.01459	-0.15781	-0.21284	0.04068
0.08075	0.00263	0.01494	0.01823	0.00274	0.02382	0.02025	-0.10026	-0.19745	-0.1496	-0.07596	-0.08567	-0.06001	0.10045	0.20788	0.08523	-0.01474	0.05298	-0.03728	-0.17841	-0.04286	0.16176	0.13395	0.00556	-0.09222	-0.13927	-0.14841	-0.06423	0.08891	0.08687	0.0118	0.00369	-0.03413	-0.05816	-0.04012	0.03195	0.16871	0.18707	-0.01211	-0.16633	-0.12402	-0.06196	-0.03378	0.00325	0.03764	0.06485	0.01816	-0.15282	-0.20816	0.04135
0.08099	0.00479	0.01966	0.02129	-0.000756063	0.01672	0.01522	-0.10057	-0.19572	-0.14942	-0.07508	-0.08479	-0.05974	0.10354	0.21052	0.08621	-0.0095	0.0589	-0.03837	-0.18473	-0.04842	0.15821	0.13322	0.00757	-0.08837	-0.13475	-0.14642	-0.06606	0.08521	0.08259	0.00696	-0.000954449	-0.03569	-0.05935	-0.04637	0.02045	0.1565	0.17845	-0.01364	-0.16203	-0.12116	-0.06113	-0.03242	0.00158	0.03379	0.06404	0.02157	-0.14761	-0.20333	0.04179
0.08123	0.00699	0.02445	0.02438	-0.00442	0.00917	0.00982	-0.1008	-0.19367	-0.14903	-0.07417	-0.08396	-0.05945	0.10685	0.21352	0.08767	-0.00397	0.06462	-0.0398	-0.19127	-0.05414	0.15446	0.13228	0.00949	-0.08442	-0.13012	-0.14457	-0.06826	0.08133	0.07845	0.00236	-0.00555	-0.03734	-0.06055	-0.05238	0.00939	0.14466	0.17	-0.01495	-0.15731	-0.11778	-0.05968	-0.03055	0.000110219	0.02978	0.06288	0.0248	-0.1422	-0.19837	0.04196
0.08147	0.00924	0.02931	0.0275	-0.00826	0.00115	0.00404	-0.10095	-0.19131	-0.14844	-0.07321	-0.08316	-0.05913	0.11037	0.21686	0.08956	0.00181	0.07011	-0.04156	-0.19795	-0.05996	0.15051	0.1311	0.01126	-0.08042	-0.12542	-0.14285	-0.07082	0.07729	0.07448	-0.00199	-0.01006	-0.03908	-0.06177	-0.05815	-0.00116	0.13327	0.16176	-0.01605	-0.15222	-0.1139	-0.05766	-0.02821	-0.00119	0.02562	0.06134	0.02784	-0.13661	-0.19333	0.04182
0.08172	0.01152	0.03424	0.03063	-0.01227	-0.00731	-0.00212	-0.10101	-0.18862	-0.14763	-0.07222	-0.08239	-0.05874	0.11411	0.22053	0.09186	0.00781	0.07534	-0.04363	-0.20472	-0.06585	0.14637	0.12967	0.01281	-0.07643	-0.12068	-0.14129	-0.07372	0.0731	0.07066	-0.00608	-0.01448	-0.04092	-0.06303	-0.06366	-0.01116	0.12237	0.15379	-0.01691	-0.14675	-0.10956	-0.05512	-0.02545	-0.00234	0.0213	0.05941	0.03064	-0.13089	-0.18824	0.04134
0.08196	0.01386	0.03923	0.03377	-0.01646	-0.01623	-0.00865	-0.10097	-0.18561	-0.1466	-0.07118	-0.08163	-0.05827	0.11807	0.22448	0.09454	0.01397	0.08028	-0.04597	-0.21152	-0.07175	0.14205	0.12796	0.01412	-0.07248	-0.11592	-0.13988	-0.07695	0.06877	0.06701	-0.00988	-0.01877	-0.04286	-0.06435	-0.06891	-0.02058	0.11203	0.14613	-0.01752	-0.14096	-0.1048	-0.05212	-0.02235	-0.00337	0.01681	0.05707	0.0332	-0.12505	-0.18314	0.04046
0.0822	0.01625	0.04429	0.0369	-0.02082	-0.02559	-0.01555	-0.10084	-0.18228	-0.14536	-0.07009	-0.08089	-0.05769	0.12224	0.22869	0.09754	0.02026	0.08493	-0.04857	-0.21827	-0.07764	0.13755	0.12593	0.01512	-0.06861	-0.11117	-0.13863	-0.08048	0.06431	0.06352	-0.01339	-0.02294	-0.04492	-0.06573	-0.07388	-0.02938	0.10228	0.1388	-0.01789	-0.13485	-0.09967	-0.0487	-0.01897	-0.00432	0.01217	0.05433	0.03549	-0.11913	-0.17808	0.03917
0.08244	0.0187	0.04943	0.04004	-0.02533	-0.03536	-0.02279	-0.10061	-0.17864	-0.1439	-0.06897	-0.08014	-0.05699	0.12661	0.23311	0.10082	0.02661	0.08926	-0.05138	-0.22493	-0.08345	0.13288	0.12357	0.01578	-0.06489	-0.10646	-0.13755	-0.08431	0.05973	0.06019	-0.0166	-0.02696	-0.04708	-0.06718	-0.07857	-0.03754	0.09316	0.13185	-0.01801	-0.12848	-0.09421	-0.04493	-0.01537	-0.0052	0.00736	0.05119	0.03749	-0.11318	-0.17309	0.03742
0.08269	0.02122	0.05464	0.04317	-0.02998	-0.04552	-0.03038	-0.10028	-0.1747	-0.14223	-0.06781	-0.07939	-0.05615	0.13117	0.23771	0.10433	0.03298	0.09326	-0.05437	-0.23143	-0.08917	0.12806	0.12087	0.01605	-0.06133	-0.10181	-0.13662	-0.08841	0.05504	0.05702	-0.01951	-0.03082	-0.04936	-0.0687	-0.08299	-0.04505	0.08469	0.12528	-0.01788	-0.12187	-0.08847	-0.04086	-0.01162	-0.00606	0.0024	0.04764	0.03918	-0.10722	-0.16823	0.03518
0.08293	0.02381	0.05993	0.04631	-0.03475	-0.05605	-0.03828	-0.09986	-0.17046	-0.14034	-0.06661	-0.07862	-0.05515	0.13591	0.24245	0.10802	0.03932	0.09691	-0.05752	-0.23772	-0.09474	0.12308	0.1178	0.01592	-0.05798	-0.09726	-0.13585	-0.09274	0.05024	0.054	-0.02211	-0.03452	-0.05175	-0.0703	-0.08712	-0.05189	0.0769	0.11912	-0.01752	-0.11507	-0.08249	-0.03657	-0.0078	-0.00691	-0.0027	0.0437	0.04054	-0.10131	-0.16354	0.03242
0.08317	0.02647	0.06531	0.04945	-0.03961	-0.06691	-0.0465	-0.09934	-0.16594	-0.13826	-0.06537	-0.07783	-0.05398	0.1408	0.24727	0.11182	0.04559	0.1002	-0.06078	-0.24374	-0.10014	0.11797	0.11437	0.01535	-0.05487	-0.09282	-0.13523	-0.09729	0.04535	0.05113	-0.02442	-0.03805	-0.05425	-0.07198	-0.09096	-0.05806	0.06978	0.11336	-0.01693	-0.10811	-0.07633	-0.0321	-0.00397	-0.00779	-0.00793	0.03938	0.04157	-0.09547	-0.15905	0.02913
0.08341	0.02921	0.07077	0.05261	-0.04455	-0.07807	-0.055	-0.09873	-0.16115	-0.13597	-0.0641	-0.07702	-0.05262	0.14584	0.25213	0.11569	0.05172	0.10314	-0.06413	-0.24946	-0.10533	0.11273	0.11057	0.01433	-0.05204	-0.08851	-0.13476	-0.10203	0.04038	0.04839	-0.02643	-0.0414	-0.05686	-0.07374	-0.09453	-0.06356	0.06334	0.10801	-0.01613	-0.10103	-0.07004	-0.02752	-0.000193434	-0.00871	-0.01326	0.03469	0.04225	-0.08975	-0.15481	0.02528
0.08366	0.03202	0.07631	0.05579	-0.04952	-0.08949	-0.06376	-0.09804	-0.15611	-0.13349	-0.0628	-0.07617	-0.05106	0.15101	0.25698	0.11956	0.05769	0.1057	-0.06754	-0.25482	-0.11029	0.10737	0.1064	0.01284	-0.04949	-0.08435	-0.13442	-0.10693	0.03533	0.04578	-0.02816	-0.04459	-0.05958	-0.07557	-0.09781	-0.06841	0.05757	0.10306	-0.01514	-0.09388	-0.06365	-0.02289	0.00346	-0.0097	-0.01869	0.02967	0.04259	-0.08418	-0.15086	0.02085
0.0839	0.0349	0.08193	0.05899	-0.05451	-0.10113	-0.07276	-0.09725	-0.15083	-0.13082	-0.06147	-0.07529	-0.04929	0.15627	0.26178	0.12338	0.06343	0.1079	-0.07096	-0.25979	-0.115	0.10191	0.10186	0.01088	-0.04725	-0.08036	-0.13421	-0.11196	0.03022	0.04329	-0.02961	-0.04761	-0.06239	-0.07746	-0.10081	-0.07261	0.05246	0.0985	-0.01397	-0.0867	-0.05723	-0.01826	0.00694	-0.01078	-0.0242	0.02433	0.04258	-0.0788	-0.14723	0.01584
0.08414	0.03786	0.08762	0.06222	-0.05947	-0.11294	-0.08197	-0.09637	-0.14533	-0.12798	-0.06012	-0.07437	-0.0473	0.1616	0.26648	0.1271	0.06891	0.10973	-0.07437	-0.26433	-0.11942	0.09637	0.09697	0.00845	-0.04533	-0.07654	-0.13411	-0.11709	0.02504	0.04091	-0.03079	-0.05047	-0.0653	-0.07942	-0.10354	-0.0762	0.04797	0.09432	-0.01266	-0.07953	-0.05082	-0.0137	0.01018	-0.01196	-0.02974	0.0187	0.04223	-0.07365	-0.14398	0.01023
0.08438	0.04089	0.09339	0.06549	-0.06438	-0.12487	-0.09134	-0.0954	-0.13962	-0.12496	-0.05875	-0.0734	-0.04509	0.16699	0.27103	0.13068	0.07409	0.11119	-0.07775	-0.26842	-0.12355	0.09075	0.09174	0.00557	-0.04373	-0.07291	-0.13411	-0.1223	0.01979	0.03863	-0.03173	-0.05317	-0.0683	-0.08144	-0.106	-0.07919	0.04408	0.09049	-0.01121	-0.07241	-0.04447	-0.00925	0.01313	-0.01326	-0.03532	0.01283	0.04153	-0.06877	-0.14112	0.00403
0.08463	0.04398	0.09922	0.06881	-0.0692	-0.13688	-0.10086	-0.09435	-0.13373	-0.12179	-0.05737	-0.07239	-0.04265	0.17241	0.2754	0.13405	0.07893	0.11229	-0.08105	-0.27202	-0.12736	0.08508	0.0862	0.00225	-0.04246	-0.06946	-0.13421	-0.12757	0.01449	0.03644	-0.03243	-0.05572	-0.07138	-0.08349	-0.10819	-0.08162	0.04076	0.08699	-0.00967	-0.06539	-0.03821	-0.00495	0.01576	-0.01468	-0.04089	0.00674	0.0405	-0.06419	-0.13869	-0.00277
0.08487	0.04713	0.10511	0.07217	-0.0739	-0.14891	-0.11047	-0.0932	-0.12767	-0.11848	-0.05599	-0.07133	-0.03999	0.17783	0.27954	0.13719	0.08339	0.11301	-0.08425	-0.27512	-0.13085	0.07937	0.08036	-0.00148	-0.0415	-0.06621	-0.13438	-0.13288	0.00913	0.03431	-0.03293	-0.05814	-0.07454	-0.08559	-0.11014	-0.08351	0.03797	0.08378	-0.00806	-0.0585	-0.03211	-0.000862495	0.01802	-0.01625	-0.04645	0.000468336	0.03915	-0.05995	-0.13673	-0.01014
0.08511	0.05033	0.11103	0.07559	-0.07845	-0.16092	-0.12016	-0.09197	-0.12148	-0.11505	-0.05461	-0.07023	-0.03709	0.18324	0.28344	0.14005	0.08746	0.11338	-0.08733	-0.27769	-0.13401	0.07363	0.07425	-0.0056	-0.04085	-0.06315	-0.13461	-0.13821	0.0037	0.03223	-0.03323	-0.06044	-0.07778	-0.08771	-0.11183	-0.0849	0.03566	0.08085	-0.0064	-0.05179	-0.02618	0.00299	0.01989	-0.01797	-0.05196	-0.00594	0.03749	-0.05607	-0.13525	-0.01808
0.08535	0.05357	0.11699	0.07906	-0.08281	-0.17284	-0.12987	-0.09066	-0.11517	-0.11151	-0.05325	-0.06909	-0.03397	0.18861	0.28705	0.1426	0.09109	0.1134	-0.09027	-0.27974	-0.13683	0.06788	0.06791	-0.01006	-0.04049	-0.06027	-0.1349	-0.14355	-0.00181	0.03018	-0.03337	-0.06263	-0.08109	-0.08986	-0.11328	-0.08582	0.0338	0.07815	-0.00474	-0.0453	-0.02048	0.00657	0.02133	-0.01983	-0.05739	-0.01246	0.03554	-0.05258	-0.13428	-0.02656
0.0856	0.05684	0.12297	0.08259	-0.08696	-0.18462	-0.13956	-0.08926	-0.10876	-0.10788	-0.05192	-0.06792	-0.03064	0.19391	0.29035	0.14481	0.09428	0.11308	-0.09303	-0.28124	-0.13931	0.06213	0.06137	-0.01482	-0.0404	-0.05758	-0.13523	-0.14887	-0.0074	0.02813	-0.03338	-0.06473	-0.08449	-0.09202	-0.1145	-0.08632	0.03233	0.07564	-0.0031	-0.03905	-0.01503	0.00984	0.02233	-0.02186	-0.06274	-0.01903	0.03331	-0.0495	-0.13383	-0.03556
0.08584	0.06013	0.12894	0.08617	-0.09087	-0.19622	-0.14921	-0.08777	-0.10229	-0.10419	-0.05065	-0.06672	-0.0271	0.19914	0.29332	0.14666	0.097	0.11242	-0.09561	-0.28219	-0.14145	0.05642	0.05467	-0.01983	-0.04056	-0.05507	-0.13559	-0.15417	-0.01308	0.02607	-0.03326	-0.06677	-0.08796	-0.09419	-0.11549	-0.08642	0.0312	0.07329	-0.0015	-0.03309	-0.00987	0.01279	0.02287	-0.02405	-0.06798	-0.02563	0.03083	-0.04686	-0.13391	-0.04503
0.08608	0.06342	0.13489	0.0898	-0.09451	-0.20759	-0.15877	-0.08621	-0.09578	-0.10046	-0.04944	-0.06552	-0.02338	0.20425	0.29593	0.14814	0.09924	0.11144	-0.09799	-0.2826	-0.14325	0.05075	0.04786	-0.02504	-0.04093	-0.05272	-0.13595	-0.15944	-0.01887	0.02398	-0.03307	-0.06877	-0.09153	-0.09638	-0.11627	-0.08615	0.03037	0.07107	1.43106e-05	-0.02745	-0.00503	0.01539	0.02294	-0.0264	-0.0731	-0.03222	0.02811	-0.04466	-0.13453	-0.05496
0.08632	0.06671	0.1408	0.09347	-0.09786	-0.21867	-0.16819	-0.08458	-0.08925	-0.09671	-0.04832	-0.06432	-0.01947	0.20923	0.29818	0.14921	0.101	0.11015	-0.10015	-0.28246	-0.1447	0.04515	0.04097	-0.0304	-0.0415	-0.05054	-0.13632	-0.16465	-0.02477	0.02182	-0.03282	-0.07076	-0.09519	-0.09857	-0.11683	-0.08556	0.0298	0.06894	0.00142	-0.02216	-0.000531749	0.01763	0.02254	-0.02891	-0.07808	-0.03875	0.02518	-0.04292	-0.13568	-0.06529
0.08657	0.06997	0.14663	0.09717	-0.1009	-0.22942	-0.17746	-0.08287	-0.08273	-0.09297	-0.0473	-0.06313	-0.01542	0.21405	0.30004	0.14988	0.10226	0.10855	-0.10208	-0.28178	-0.14581	0.03964	0.03405	-0.03585	-0.04222	-0.04851	-0.13667	-0.1698	-0.03078	0.01959	-0.03253	-0.07276	-0.09896	-0.10078	-0.11719	-0.08467	0.02944	0.06687	0.0027	-0.01724	0.0036	0.01949	0.02167	-0.0316	-0.08291	-0.0452	0.02207	-0.04164	-0.13736	-0.07598
0.08681	0.07318	0.15237	0.10089	-0.10362	-0.2398	-0.18652	-0.0811	-0.07625	-0.08926	-0.0464	-0.06197	-0.01124	0.2187	0.3015	0.15013	0.10302	0.10666	-0.10378	-0.28057	-0.14657	0.03425	0.02715	-0.04133	-0.04306	-0.04662	-0.137	-0.17488	-0.03692	0.01728	-0.03224	-0.0748	-0.10285	-0.103	-0.11735	-0.08351	0.02926	0.06482	0.00382	-0.01271	0.00736	0.02098	0.02034	-0.03446	-0.08759	-0.05154	0.01879	-0.04083	-0.13956	-0.08699
0.08705	0.07634	0.15798	0.10461	-0.106	-0.24975	-0.19534	-0.07926	-0.06982	-0.0856	-0.04565	-0.06086	-0.00695	0.22313	0.30256	0.14996	0.10328	0.10449	-0.10522	-0.27882	-0.14699	0.02898	0.02032	-0.04678	-0.04399	-0.04485	-0.13728	-0.17987	-0.04317	0.01487	-0.03197	-0.0769	-0.10688	-0.10524	-0.11733	-0.08211	0.02919	0.06276	0.00476	-0.00861	0.01072	0.02209	0.01854	-0.03749	-0.09211	-0.05773	0.01537	-0.04049	-0.14228	-0.09828
0.08729	0.07941	0.16343	0.10832	-0.10804	-0.25926	-0.2039	-0.07737	-0.06348	-0.08202	-0.04505	-0.05982	-0.00259	0.22733	0.30319	0.14936	0.10303	0.10204	-0.10642	-0.27656	-0.14706	0.02388	0.01359	-0.05214	-0.04496	-0.04319	-0.13751	-0.18476	-0.04955	0.01236	-0.03174	-0.0791	-0.11106	-0.10752	-0.11714	-0.08049	0.02923	0.06067	0.00551	-0.00493	0.01368	0.02283	0.0163	-0.0407	-0.09647	-0.06376	0.01184	-0.04062	-0.14549	-0.1098
0.08754	0.08239	0.16869	0.11199	-0.10973	-0.26828	-0.21216	-0.07543	-0.05724	-0.07855	-0.04462	-0.05885	0.00183	0.23128	0.30339	0.14832	0.10229	0.09932	-0.10737	-0.27379	-0.1468	0.01895	0.00702	-0.05735	-0.04595	-0.04162	-0.13768	-0.18954	-0.05604	0.00974	-0.03156	-0.08142	-0.11541	-0.10983	-0.11679	-0.0787	0.02931	0.05853	0.00603	-0.00169	0.01624	0.0232	0.01362	-0.04408	-0.10068	-0.0696	0.0082	-0.04122	-0.14918	-0.1215
0.08778	0.08525	0.17373	0.1156	-0.11108	-0.27678	-0.22009	-0.07344	-0.05113	-0.07519	-0.04438	-0.05798	0.00626	0.23495	0.30315	0.14685	0.10106	0.09634	-0.10807	-0.27054	-0.14621	0.01421	0.000652309	-0.06236	-0.04691	-0.04014	-0.13776	-0.1942	-0.06264	0.00701	-0.03146	-0.0839	-0.11995	-0.11219	-0.11628	-0.07674	0.02942	0.0563	0.00632	0.0011	0.01839	0.02321	0.01054	-0.04764	-0.10474	-0.07524	0.00448	-0.04227	-0.15333	-0.13333
0.08802	0.08797	0.17852	0.11913	-0.11208	-0.28474	-0.22766	-0.07143	-0.04517	-0.07198	-0.04435	-0.05721	0.01067	0.23831	0.30248	0.14495	0.09933	0.0931	-0.10852	-0.26681	-0.14528	0.00968	-0.00549	-0.06711	-0.04781	-0.03872	-0.13775	-0.19872	-0.06934	0.00418	-0.03144	-0.08654	-0.1247	-0.11461	-0.11563	-0.07465	0.02952	0.05396	0.00637	0.00343	0.02014	0.02289	0.00708	-0.05138	-0.10865	-0.08065	0.000708245	-0.04378	-0.15792	-0.14527
0.08826	0.09054	0.18302	0.12254	-0.11276	-0.29213	-0.23487	-0.0694	-0.03938	-0.06893	-0.04452	-0.05657	0.01504	0.24135	0.30135	0.14263	0.09714	0.08963	-0.10872	-0.26263	-0.14405	0.00537	-0.01135	-0.07155	-0.04861	-0.03735	-0.13765	-0.20309	-0.07612	0.00127	-0.03151	-0.08939	-0.12967	-0.11711	-0.11485	-0.07243	0.02958	0.05149	0.00615	0.00531	0.0215	0.02223	0.00325	-0.05528	-0.11243	-0.08584	-0.00311	-0.04572	-0.16292	-0.15726
0.08851	0.09294	0.1872	0.12581	-0.11313	-0.29895	-0.24167	-0.06735	-0.03379	-0.06605	-0.04491	-0.05608	0.01933	0.24403	0.29977	0.13988	0.09447	0.08593	-0.10869	-0.25802	-0.1425	0.00129	-0.01692	-0.07563	-0.04929	-0.03601	-0.13743	-0.2073	-0.08296	-0.00173	-0.03169	-0.09247	-0.13489	-0.1197	-0.11394	-0.07011	0.02958	0.04888	0.00566	0.00675	0.02248	0.02128	-0.000898134	-0.05935	-0.11608	-0.09077	-0.00696	-0.04809	-0.16832	-0.16926
0.08875	0.09514	0.19102	0.1289	-0.1132	-0.30517	-0.24807	-0.06531	-0.02841	-0.06338	-0.04553	-0.05572	0.0235	0.24633	0.29774	0.13671	0.09137	0.08202	-0.10843	-0.253	-0.14067	-0.00254	-0.02215	-0.07933	-0.04981	-0.0347	-0.13708	-0.21133	-0.08984	-0.00478	-0.03198	-0.0958	-0.14038	-0.12239	-0.11291	-0.06769	0.0295	0.0461	0.0049	0.00775	0.02309	0.02003	-0.00535	-0.06359	-0.11961	-0.09547	-0.01083	-0.05087	-0.17406	-0.18122
0.08899	0.09714	0.19446	0.13177	-0.113	-0.3108	-0.25404	-0.06329	-0.02328	-0.06091	-0.04638	-0.05553	0.02753	0.24824	0.29525	0.13315	0.08784	0.07791	-0.10794	-0.24759	-0.13856	-0.00613	-0.02702	-0.0826	-0.05015	-0.03339	-0.13661	-0.21516	-0.09672	-0.00787	-0.03239	-0.09939	-0.14616	-0.1252	-0.11176	-0.06518	0.02933	0.04316	0.00386	0.00833	0.02335	0.01852	-0.01007	-0.06797	-0.12303	-0.09991	-0.0147	-0.05403	-0.18013	-0.19312
0.08923	0.09891	0.19749	0.13439	-0.11255	-0.31582	-0.25958	-0.06131	-0.0184	-0.05867	-0.04746	-0.05551	0.03138	0.24974	0.29231	0.1292	0.08392	0.0736	-0.10724	-0.24183	-0.13618	-0.00946	-0.03152	-0.0854	-0.0503	-0.03209	-0.136	-0.21878	-0.10359	-0.01098	-0.0329	-0.10328	-0.15224	-0.12813	-0.1105	-0.06258	0.02906	0.04003	0.00255	0.00851	0.02328	0.01677	-0.01503	-0.0725	-0.12637	-0.10411	-0.01857	-0.05757	-0.18648	-0.2049
0.08948	0.10045	0.20006	0.13672	-0.11189	-0.32024	-0.26467	-0.05938	-0.01379	-0.05665	-0.04876	-0.05565	0.03503	0.2508	0.28892	0.12488	0.07962	0.06914	-0.10634	-0.23575	-0.13355	-0.01254	-0.03561	-0.08773	-0.05022	-0.03077	-0.13524	-0.22217	-0.1104	-0.01406	-0.03352	-0.10747	-0.15862	-0.13119	-0.10914	-0.0599	0.02867	0.03672	0.000973384	0.00831	0.02291	0.01479	-0.02021	-0.07718	-0.12962	-0.10807	-0.02243	-0.06146	-0.19308	-0.21653
0.08972	0.10174	0.20216	0.13874	-0.11103	-0.32405	-0.26931	-0.05751	-0.00948	-0.05488	-0.05028	-0.05596	0.03845	0.25142	0.28509	0.12022	0.07499	0.06452	-0.10525	-0.22936	-0.1307	-0.01535	-0.0393	-0.08957	-0.04992	-0.02943	-0.13433	-0.22532	-0.1171	-0.01708	-0.03423	-0.11197	-0.16533	-0.13439	-0.10766	-0.05713	0.02818	0.03322	-0.000865551	0.00776	0.02225	0.0126	-0.02557	-0.08199	-0.13281	-0.1118	-0.02627	-0.06568	-0.19988	-0.22797
0.08996	0.10276	0.20376	0.14039	-0.11002	-0.32726	-0.27351	-0.05574	-0.00548	-0.05334	-0.05201	-0.05645	0.04161	0.25157	0.28082	0.11524	0.07005	0.05977	-0.10399	-0.22271	-0.12762	-0.01791	-0.04257	-0.0909	-0.04937	-0.02807	-0.13326	-0.22819	-0.12367	-0.02002	-0.03504	-0.11679	-0.17237	-0.13775	-0.10607	-0.05426	0.02757	0.02952	-0.00296	0.00688	0.02134	0.01022	-0.03109	-0.08693	-0.13596	-0.11532	-0.03011	-0.0702	-0.20684	-0.23919
0.0902	0.10352	0.20484	0.14165	-0.10888	-0.32988	-0.27724	-0.05406	-0.00179	-0.05205	-0.05393	-0.0571	0.04449	0.25125	0.27612	0.10997	0.06484	0.05491	-0.10256	-0.21582	-0.12436	-0.02021	-0.04542	-0.09171	-0.04857	-0.02667	-0.13204	-0.23077	-0.13005	-0.02281	-0.03591	-0.12194	-0.17972	-0.14124	-0.10438	-0.0513	0.02684	0.02563	-0.0053	0.0057	0.02018	0.00767	-0.03675	-0.09199	-0.13909	-0.11866	-0.03394	-0.075	-0.21394	-0.25015
0.09045	0.104	0.20539	0.1425	-0.10765	-0.33193	-0.28054	-0.0525	0.00158	-0.05098	-0.05603	-0.05791	0.04707	0.25045	0.27101	0.10443	0.0594	0.04996	-0.101	-0.20874	-0.12093	-0.02227	-0.04786	-0.09202	-0.04753	-0.02524	-0.13064	-0.23304	-0.13618	-0.02542	-0.03684	-0.1274	-0.18739	-0.14489	-0.10258	-0.04824	0.02599	0.02154	-0.00788	0.00425	0.01881	0.00495	-0.04253	-0.09716	-0.14221	-0.12182	-0.03776	-0.08005	-0.22111	-0.26082
0.09069	0.1042	0.20538	0.14289	-0.10635	-0.3334	-0.28338	-0.05107	0.00461	-0.05014	-0.05828	-0.05887	0.04933	0.24915	0.2655	0.09866	0.05378	0.04494	-0.09931	-0.20149	-0.11735	-0.02409	-0.04988	-0.09182	-0.04624	-0.02376	-0.12908	-0.23497	-0.14203	-0.0278	-0.03779	-0.13317	-0.19538	-0.14869	-0.10067	-0.04508	0.02501	0.01724	-0.0107	0.00255	0.01725	0.00208	-0.04841	-0.10245	-0.14535	-0.12485	-0.04159	-0.08533	-0.22832	-0.27116
0.09093	0.10412	0.20481	0.14283	-0.10501	-0.33432	-0.28579	-0.04978	0.00732	-0.04952	-0.06066	-0.05998	0.05126	0.24736	0.25959	0.0927	0.048	0.03989	-0.0975	-0.19411	-0.11364	-0.0257	-0.0515	-0.09113	-0.04471	-0.02224	-0.12734	-0.23654	-0.14752	-0.02992	-0.03876	-0.13923	-0.20365	-0.15263	-0.09865	-0.04182	0.02391	0.01273	-0.01374	0.000625449	0.01551	-0.000939203	-0.05438	-0.10784	-0.14853	-0.12777	-0.04543	-0.09081	-0.23553	-0.28115
0.09117	0.10376	0.20368	0.14228	-0.10367	-0.3347	-0.28777	-0.04866	0.00969	-0.04909	-0.06314	-0.06121	0.05283	0.24507	0.25331	0.08656	0.04212	0.03482	-0.0956	-0.18664	-0.10985	-0.0271	-0.05274	-0.08998	-0.04295	-0.02068	-0.12544	-0.23774	-0.15262	-0.03171	-0.03971	-0.14556	-0.2122	-0.15671	-0.09654	-0.03846	0.02269	0.00799	-0.01702	-0.00149	0.01361	-0.0041	-0.06042	-0.11332	-0.15175	-0.1306	-0.04929	-0.09646	-0.24269	-0.29076
0.09142	0.10312	0.20199	0.14123	-0.10233	-0.33456	-0.28932	-0.0477	0.01173	-0.04885	-0.06571	-0.06256	0.05405	0.24227	0.24668	0.08029	0.03618	0.02975	-0.09362	-0.17911	-0.10599	-0.02833	-0.05362	-0.08839	-0.04098	-0.01907	-0.12336	-0.23853	-0.15727	-0.03313	-0.04061	-0.15214	-0.221	-0.16093	-0.09433	-0.03502	0.02132	0.00303	-0.02053	-0.00378	0.01158	-0.0074	-0.06652	-0.11888	-0.15504	-0.13339	-0.05318	-0.10225	-0.24978	-0.29996
0.09166	0.1022	0.19975	0.13969	-0.10103	-0.33392	-0.29046	-0.04693	0.01344	-0.04877	-0.06832	-0.064	0.05491	0.23898	0.2397	0.07391	0.03021	0.02473	-0.09157	-0.17156	-0.10211	-0.0294	-0.05418	-0.08639	-0.0388	-0.01743	-0.1211	-0.2389	-0.16142	-0.03414	-0.04143	-0.15893	-0.23002	-0.16528	-0.09204	-0.03148	0.01982	-0.00217	-0.02426	-0.00622	0.00942	-0.01085	-0.07267	-0.12451	-0.15841	-0.13615	-0.05711	-0.10817	-0.25675	-0.30874
0.0919	0.10102	0.19696	0.13765	-0.09978	-0.33278	-0.2912	-0.04634	0.01483	-0.04883	-0.07094	-0.06552	0.05541	0.2352	0.2324	0.06747	0.02426	0.01976	-0.08947	-0.16404	-0.09822	-0.03035	-0.05443	-0.08401	-0.03644	-0.01575	-0.11868	-0.23883	-0.16501	-0.0347	-0.04214	-0.16589	-0.23924	-0.16974	-0.08966	-0.02786	0.01817	-0.00762	-0.02821	-0.00878	0.00715	-0.01444	-0.07886	-0.13019	-0.16187	-0.13892	-0.0611	-0.11418	-0.26356	-0.31707
0.09214	0.09958	0.19364	0.13511	-0.09859	-0.33118	-0.29154	-0.04595	0.0159	-0.04902	-0.07354	-0.0671	0.05553	0.23093	0.2248	0.061	0.01836	0.01488	-0.08733	-0.15656	-0.09437	-0.0312	-0.05441	-0.08129	-0.03392	-0.01404	-0.11609	-0.2383	-0.16801	-0.03477	-0.0427	-0.173	-0.24861	-0.17432	-0.08721	-0.02417	0.01638	-0.01332	-0.03236	-0.01144	0.00479	-0.01818	-0.0851	-0.13591	-0.16542	-0.14172	-0.06515	-0.12026	-0.27018	-0.32492
0.09239	0.09789	0.18982	0.13209	-0.09748	-0.32912	-0.2915	-0.04575	0.01666	-0.0493	-0.0761	-0.06871	0.0553	0.22619	0.21693	0.05453	0.01256	0.01012	-0.08516	-0.14918	-0.09059	-0.03199	-0.05415	-0.07827	-0.03126	-0.01229	-0.11333	-0.2373	-0.17037	-0.03431	-0.04309	-0.18019	-0.2581	-0.179	-0.08469	-0.02042	0.01444	-0.01927	-0.03673	-0.01416	0.00234	-0.02208	-0.09136	-0.14166	-0.16906	-0.14458	-0.06928	-0.12639	-0.27659	-0.33229
0.09263	0.09597	0.18552	0.12861	-0.09645	-0.32663	-0.29109	-0.04575	0.01713	-0.04966	-0.07858	-0.07034	0.05471	0.22099	0.20881	0.04811	0.0069	0.00549	-0.08297	-0.14192	-0.0869	-0.03273	-0.0537	-0.075	-0.02849	-0.01053	-0.11042	-0.23582	-0.17206	-0.0333	-0.04327	-0.18742	-0.26766	-0.18376	-0.08212	-0.01661	0.01234	-0.02549	-0.04129	-0.01692	-0.00017005	-0.02615	-0.09766	-0.1474	-0.17279	-0.14752	-0.07349	-0.13254	-0.28275	-0.33914
0.09287	0.09383	0.18077	0.12468	-0.0955	-0.32372	-0.2903	-0.04594	0.01732	-0.05007	-0.08094	-0.07197	0.05378	0.21536	0.20047	0.04175	0.0014	0.00102	-0.08077	-0.13481	-0.08334	-0.03347	-0.05307	-0.07152	-0.02563	-0.00875	-0.10736	-0.23385	-0.17305	-0.03171	-0.04321	-0.19463	-0.27725	-0.18859	-0.07951	-0.01276	0.01008	-0.03196	-0.04603	-0.0197	-0.00274	-0.03039	-0.10398	-0.15313	-0.17662	-0.15056	-0.07778	-0.13869	-0.28863	-0.34547
0.09311	0.09148	0.17559	0.12034	-0.09464	-0.32041	-0.28916	-0.04632	0.01724	-0.05051	-0.08315	-0.07356	0.05252	0.20932	0.19194	0.03551	-0.00389	-0.00327	-0.07858	-0.12789	-0.07995	-0.03423	-0.05233	-0.06787	-0.0227	-0.00696	-0.10416	-0.23139	-0.17332	-0.02953	-0.04287	-0.20177	-0.2868	-0.19346	-0.07687	-0.00889	0.00767	-0.03868	-0.05094	-0.02247	-0.00536	-0.03481	-0.11033	-0.15881	-0.18053	-0.15372	-0.08217	-0.14482	-0.2942	-0.35126
0.09336	0.08896	0.17004	0.11562	-0.09386	-0.31672	-0.28767	-0.04686	0.01692	-0.05095	-0.0852	-0.07511	0.05095	0.2029	0.18326	0.02942	-0.00894	-0.00735	-0.0764	-0.12117	-0.07675	-0.03505	-0.05149	-0.0641	-0.01974	-0.00518	-0.10082	-0.22845	-0.17286	-0.02675	-0.04223	-0.20878	-0.29628	-0.19837	-0.07422	-0.00501	0.00509	-0.04567	-0.05601	-0.0252	-0.00803	-0.03944	-0.1167	-0.16443	-0.18451	-0.15701	-0.08666	-0.1509	-0.29945	-0.35648
0.0936	0.08627	0.16414	0.11055	-0.09315	-0.31266	-0.28582	-0.04757	0.01637	-0.05136	-0.08705	-0.07659	0.04909	0.19612	0.17445	0.0235	-0.01373	-0.01122	-0.07424	-0.1147	-0.07378	-0.03596	-0.05061	-0.06024	-0.01676	-0.0034	-0.09737	-0.22503	-0.17165	-0.02335	-0.04126	-0.21558	-0.30561	-0.20329	-0.07156	-0.00115	0.00235	-0.05289	-0.06121	-0.02788	-0.01072	-0.04426	-0.12309	-0.16997	-0.18855	-0.16044	-0.09124	-0.15691	-0.30434	-0.36113
0.09384	0.08343	0.15795	0.10518	-0.09252	-0.30825	-0.28364	-0.04842	0.01562	-0.05173	-0.08867	-0.07799	0.04696	0.18901	0.16556	0.0178	-0.01821	-0.01485	-0.0721	-0.10849	-0.07105	-0.03699	-0.04971	-0.05634	-0.0138	-0.00165	-0.09381	-0.22114	-0.16971	-0.01937	-0.03994	-0.22212	-0.31475	-0.20819	-0.06893	0.00269	-0.0005472	-0.06036	-0.06654	-0.03046	-0.01344	-0.04929	-0.12948	-0.17539	-0.19264	-0.16402	-0.09592	-0.16283	-0.30886	-0.36518
0.09408	0.08046	0.15149	0.09954	-0.09193	-0.3035	-0.28111	-0.04939	0.01468	-0.05203	-0.09006	-0.07927	0.04458	0.18161	0.15661	0.01234	-0.02238	-0.01822	-0.06999	-0.10256	-0.0686	-0.03818	-0.04884	-0.05245	-0.01088	7.59654e-05	-0.09016	-0.21679	-0.16705	-0.0148	-0.03824	-0.22834	-0.32365	-0.21307	-0.06632	0.00648	-0.00361	-0.06805	-0.07197	-0.03294	-0.01618	-0.05453	-0.13588	-0.18067	-0.19674	-0.16774	-0.1007	-0.16863	-0.31299	-0.36862
0.09433	0.07738	0.14482	0.09369	-0.09138	-0.29842	-0.27825	-0.05047	0.01359	-0.05225	-0.09118	-0.08043	0.04198	0.17396	0.14764	0.00715	-0.02619	-0.02133	-0.06792	-0.09693	-0.06646	-0.03955	-0.04803	-0.04859	-0.00802	0.00176	-0.08644	-0.21202	-0.16368	-0.00966	-0.03615	-0.23417	-0.33224	-0.21789	-0.06376	0.01019	-0.00683	-0.07595	-0.07747	-0.03529	-0.01893	-0.05998	-0.14226	-0.18578	-0.20084	-0.17161	-0.10556	-0.1743	-0.3167	-0.37145
0.09457	0.07422	0.13798	0.08767	-0.09086	-0.29304	-0.27506	-0.05162	0.01237	-0.05236	-0.09203	-0.08145	0.03919	0.16609	0.13869	0.00226	-0.02964	-0.02416	-0.06588	-0.09161	-0.06464	-0.04113	-0.04731	-0.04482	-0.00525	0.00338	-0.08266	-0.20684	-0.15964	-0.00399	-0.03365	-0.23956	-0.34048	-0.22264	-0.06127	0.0138	-0.01021	-0.08404	-0.08303	-0.03749	-0.02169	-0.06563	-0.14862	-0.19068	-0.20491	-0.17561	-0.1105	-0.17982	-0.31999	-0.37366
0.09481	0.071	0.13101	0.08153	-0.09034	-0.28737	-0.27154	-0.05282	0.01104	-0.05236	-0.09259	-0.0823	0.03623	0.15804	0.12978	-0.00232	-0.03271	-0.0267	-0.06387	-0.08662	-0.06316	-0.04295	-0.04671	-0.04115	-0.00259	0.00495	-0.07884	-0.20128	-0.15496	0.00218	-0.03073	-0.24446	-0.34832	-0.2273	-0.05887	0.01729	-0.01374	-0.09229	-0.08862	-0.03953	-0.02444	-0.07147	-0.15493	-0.19536	-0.20892	-0.17972	-0.1155	-0.18516	-0.32286	-0.37525
0.09505	0.06772	0.12397	0.07532	-0.08981	-0.28141	-0.26768	-0.05404	0.00963	-0.05223	-0.09286	-0.08298	0.03314	0.14986	0.12096	-0.00655	-0.03538	-0.02895	-0.06191	-0.08196	-0.06203	-0.04503	-0.04627	-0.03763	-5.8361e-05	0.00643	-0.07499	-0.19538	-0.14968	0.00881	-0.02739	-0.2488	-0.35572	-0.23187	-0.05658	0.02063	-0.01742	-0.10069	-0.09421	-0.04139	-0.02718	-0.0775	-0.16118	-0.19977	-0.21283	-0.18392	-0.12055	-0.19033	-0.3253	-0.37624
0.0953	0.06442	0.1169	0.06908	-0.08924	-0.27518	-0.26351	-0.05526	0.00816	-0.05196	-0.09282	-0.08348	0.02995	0.14158	0.11226	-0.01044	-0.03767	-0.03089	-0.05998	-0.07763	-0.06127	-0.04738	-0.046	-0.03428	0.00232	0.00783	-0.07115	-0.18917	-0.14386	0.01584	-0.02364	-0.25256	-0.36264	-0.23632	-0.05443	0.02379	-0.02124	-0.10918	-0.09978	-0.04306	-0.02991	-0.08368	-0.16735	-0.20389	-0.21661	-0.1882	-0.12563	-0.19529	-0.32732	-0.37662
0.09554	0.06111	0.10984	0.06288	-0.08863	-0.26869	-0.25901	-0.05645	0.00665	-0.05154	-0.09249	-0.08378	0.02669	0.13325	0.10371	-0.01396	-0.03955	-0.03254	-0.05808	-0.07364	-0.0609	-0.05004	-0.04593	-0.03113	0.00453	0.00913	-0.06732	-0.1827	-0.13755	0.02323	-0.01947	-0.25569	-0.36905	-0.24066	-0.05245	0.02674	-0.02519	-0.11775	-0.10528	-0.04452	-0.03261	-0.09001	-0.1734	-0.20769	-0.22022	-0.19251	-0.13073	-0.20004	-0.32892	-0.37642
0.09578	0.05781	0.10283	0.05674	-0.08794	-0.26197	-0.2542	-0.05758	0.00514	-0.05098	-0.09186	-0.08387	0.0234	0.1249	0.09535	-0.01712	-0.04105	-0.0339	-0.05622	-0.07	-0.0609	-0.053	-0.04608	-0.0282	0.00656	0.01033	-0.06352	-0.17599	-0.13081	0.03091	-0.0149	-0.25816	-0.37493	-0.24486	-0.05066	0.02943	-0.02927	-0.12635	-0.11071	-0.04579	-0.03527	-0.09645	-0.17932	-0.21114	-0.22362	-0.19683	-0.13582	-0.20457	-0.33011	-0.37566
0.09602	0.05454	0.09591	0.05072	-0.08717	-0.25502	-0.24907	-0.05862	0.00363	-0.05026	-0.09094	-0.08376	0.02009	0.11659	0.08719	-0.0199	-0.04216	-0.03496	-0.05438	-0.06668	-0.06129	-0.05629	-0.04646	-0.02549	0.0084	0.01142	-0.05978	-0.1691	-0.12372	0.03882	-0.00995	-0.25993	-0.38024	-0.24893	-0.04909	0.03186	-0.03347	-0.13495	-0.11602	-0.04684	-0.0379	-0.10298	-0.18507	-0.21422	-0.22678	-0.20112	-0.14087	-0.20886	-0.3309	-0.37437
0.09627	0.05131	0.08911	0.04486	-0.08631	-0.24786	-0.24365	-0.05956	0.00216	-0.04939	-0.08974	-0.08344	0.01682	0.10836	0.07928	-0.02232	-0.0429	-0.03573	-0.05257	-0.06369	-0.06207	-0.05991	-0.0471	-0.02304	0.01004	0.01238	-0.0561	-0.16208	-0.11633	0.04689	-0.00463	-0.26101	-0.38497	-0.25287	-0.04777	0.03396	-0.03777	-0.14349	-0.12118	-0.0477	-0.04049	-0.10956	-0.19064	-0.21692	-0.22967	-0.20535	-0.14587	-0.21292	-0.33131	-0.37256
0.09651	0.04813	0.08248	0.03919	-0.08532	-0.2405	-0.23793	-0.06036	0.00073883	-0.04837	-0.08827	-0.0829	0.01359	0.10024	0.07163	-0.02438	-0.04328	-0.03623	-0.05078	-0.06101	-0.06323	-0.06387	-0.04798	-0.02084	0.01147	0.01323	-0.05251	-0.15495	-0.10872	0.05505	0.00102	-0.26135	-0.3891	-0.25666	-0.04673	0.03572	-0.04217	-0.15193	-0.12617	-0.04834	-0.04304	-0.11618	-0.196	-0.2192	-0.23224	-0.20946	-0.15078	-0.21674	-0.33135	-0.37026
0.09675	0.04502	0.07603	0.03374	-0.08422	-0.23298	-0.23193	-0.06101	-0.00061711	-0.04722	-0.08655	-0.08215	0.01044	0.09227	0.06426	-0.02608	-0.04332	-0.03647	-0.04902	-0.05864	-0.06477	-0.06817	-0.04914	-0.0189	0.01271	0.01394	-0.04902	-0.14779	-0.10097	0.06322	0.00698	-0.26098	-0.39264	-0.2603	-0.04598	0.0371	-0.04665	-0.16023	-0.13095	-0.0488	-0.04554	-0.12278	-0.20111	-0.22105	-0.23448	-0.21342	-0.15559	-0.22031	-0.33104	-0.36751
0.09699	0.04199	0.06979	0.02854	-0.08299	-0.22529	-0.22566	-0.06148	-0.00189	-0.04593	-0.08459	-0.0812	0.0074	0.08449	0.0572	-0.02744	-0.04305	-0.03647	-0.04728	-0.05656	-0.06668	-0.0728	-0.05055	-0.01721	0.01374	0.01453	-0.04565	-0.14062	-0.09315	0.07135	0.01321	-0.25988	-0.39557	-0.2638	-0.04557	0.03806	-0.05122	-0.16834	-0.1355	-0.04906	-0.04799	-0.12935	-0.20595	-0.22248	-0.23635	-0.21719	-0.16027	-0.22363	-0.33038	-0.36434
0.09724	0.03905	0.06378	0.02361	-0.08161	-0.21747	-0.21914	-0.06177	-0.00308	-0.04451	-0.08242	-0.08005	0.00447	0.07692	0.05045	-0.02849	-0.04249	-0.03623	-0.04555	-0.05477	-0.06895	-0.07777	-0.05223	-0.01578	0.01457	0.01499	-0.04241	-0.13349	-0.08533	0.07934	0.01968	-0.25807	-0.39789	-0.26714	-0.04549	0.03858	-0.05585	-0.17621	-0.13978	-0.04914	-0.05038	-0.13583	-0.2105	-0.22346	-0.23782	-0.22073	-0.16478	-0.2267	-0.32941	-0.36076
0.09748	0.03621	0.05803	0.01898	-0.0801	-0.20952	-0.21238	-0.06186	-0.00416	-0.04298	-0.08005	-0.07871	0.00169	0.06959	0.04404	-0.02922	-0.04166	-0.03578	-0.04385	-0.05325	-0.07156	-0.08305	-0.05416	-0.01459	0.01521	0.01533	-0.03931	-0.12645	-0.07759	0.08714	0.02634	-0.25557	-0.39962	-0.27033	-0.04579	0.03862	-0.06055	-0.1838	-0.14378	-0.04905	-0.05271	-0.14219	-0.21473	-0.22399	-0.23887	-0.22399	-0.16912	-0.22952	-0.32812	-0.35683
0.09772	0.03347	0.05254	0.01466	-0.07843	-0.20148	-0.2054	-0.06175	-0.00513	-0.04136	-0.07751	-0.07718	-0.00093241	0.06253	0.03795	-0.02968	-0.04059	-0.03514	-0.04217	-0.05199	-0.07451	-0.08863	-0.05634	-0.01364	0.01566	0.01554	-0.03635	-0.11954	-0.06999	0.09468	0.03315	-0.2524	-0.40076	-0.27337	-0.04646	0.03816	-0.06531	-0.19106	-0.14746	-0.04879	-0.05497	-0.1484	-0.21861	-0.22407	-0.23949	-0.22694	-0.17324	-0.23208	-0.32655	-0.35256
0.09796	0.03084	0.04733	0.01066	-0.07662	-0.19337	-0.19823	-0.06142	-0.00599	-0.03965	-0.07482	-0.07547	-0.00338	0.05576	0.03221	-0.02988	-0.03931	-0.03432	-0.04051	-0.05097	-0.07777	-0.09451	-0.05875	-0.01293	0.01595	0.01563	-0.03356	-0.1128	-0.0626	0.10189	0.04006	-0.24859	-0.40133	-0.27624	-0.04752	0.03717	-0.07012	-0.19797	-0.1508	-0.04839	-0.05716	-0.1544	-0.22211	-0.22371	-0.23965	-0.22954	-0.17713	-0.23438	-0.32471	-0.34799
0.09821	0.02832	0.04242	0.00699	-0.07467	-0.1852	-0.19089	-0.06088	-0.00673	-0.03787	-0.072	-0.07361	-0.00565	0.04929	0.02682	-0.02984	-0.03785	-0.03335	-0.03887	-0.05018	-0.08132	-0.10064	-0.06139	-0.01243	0.01606	0.01561	-0.03093	-0.10625	-0.05548	0.10871	0.04702	-0.24419	-0.40135	-0.27895	-0.04899	0.03562	-0.07498	-0.20448	-0.15379	-0.04786	-0.05927	-0.16016	-0.22522	-0.22289	-0.23935	-0.23175	-0.18076	-0.23643	-0.32261	-0.34316
0.09845	0.02593	0.0378	0.00365	-0.07258	-0.177	-0.1834	-0.06013	-0.00736	-0.03605	-0.06907	-0.07159	-0.00773	0.04314	0.02177	-0.02959	-0.03624	-0.03223	-0.03726	-0.04961	-0.08514	-0.10702	-0.06423	-0.01213	0.01603	0.01549	-0.02846	-0.09994	-0.04868	0.11509	0.05399	-0.23923	-0.40085	-0.2815	-0.05086	0.03349	-0.07989	-0.21056	-0.15641	-0.0472	-0.06129	-0.16565	-0.22791	-0.22164	-0.23858	-0.23355	-0.18412	-0.23822	-0.32026	-0.33808
0.09869	0.02366	0.03348	0.00064431	-0.07036	-0.16879	-0.17579	-0.05917	-0.00788	-0.03419	-0.06607	-0.06944	-0.00961	0.03733	0.01706	-0.02916	-0.0345	-0.031	-0.03568	-0.04925	-0.08921	-0.1136	-0.06725	-0.01203	0.01585	0.01527	-0.02616	-0.09389	-0.04226	0.12099	0.06092	-0.23376	-0.39984	-0.28387	-0.05314	0.03076	-0.08485	-0.21618	-0.15864	-0.04644	-0.06322	-0.17083	-0.23017	-0.21997	-0.23733	-0.23492	-0.18718	-0.23976	-0.3177	-0.3328
0.09893	0.02152	0.02946	-0.00203	-0.06801	-0.16061	-0.1681	-0.05802	-0.0083	-0.03231	-0.06302	-0.06716	-0.01128	0.03185	0.0127	-0.02857	-0.03266	-0.02967	-0.03413	-0.04908	-0.0935	-0.12034	-0.07042	-0.01209	0.01555	0.01497	-0.02402	-0.08811	-0.03625	0.12634	0.06775	-0.22784	-0.39836	-0.28607	-0.05583	0.02743	-0.08985	-0.22132	-0.16048	-0.04559	-0.06506	-0.17568	-0.23199	-0.21789	-0.23563	-0.23583	-0.18993	-0.24104	-0.31492	-0.32734
0.09918	0.0195	0.02575	-0.00437	-0.06556	-0.15247	-0.16035	-0.05668	-0.00861	-0.03044	-0.05992	-0.06477	-0.01275	0.02673	0.00867	-0.02785	-0.03076	-0.02825	-0.03262	-0.04909	-0.09798	-0.12722	-0.07373	-0.01231	0.01515	0.0146	-0.02204	-0.08263	-0.03069	0.13113	0.07445	-0.22153	-0.39643	-0.28809	-0.05892	0.02349	-0.09491	-0.22596	-0.16193	-0.04466	-0.0668	-0.18016	-0.23336	-0.21542	-0.23347	-0.23628	-0.19235	-0.24208	-0.31195	-0.32173
0.09942	0.01762	0.02233	-0.0064	-0.06301	-0.1444	-0.15257	-0.05517	-0.00883	-0.02858	-0.05682	-0.06229	-0.01401	0.02196	0.00496	-0.02702	-0.0288	-0.02676	-0.03113	-0.04927	-0.10261	-0.13418	-0.07713	-0.01267	0.01465	0.01417	-0.02021	-0.07746	-0.02561	0.13532	0.08096	-0.21487	-0.39409	-0.28992	-0.06239	0.01893	-0.1	-0.23008	-0.16296	-0.04368	-0.06845	-0.18426	-0.23428	-0.2126	-0.23087	-0.23625	-0.19444	-0.24287	-0.30879	-0.31599
0.09966	0.01586	0.01921	-0.00812	-0.06038	-0.13643	-0.14479	-0.0535	-0.00896	-0.02675	-0.05372	-0.05973	-0.01507	0.01754	0.00157	-0.02612	-0.02683	-0.02523	-0.02969	-0.0496	-0.10738	-0.14117	-0.0806	-0.01314	0.01408	0.0137	-0.01852	-0.07259	-0.02103	0.13888	0.08724	-0.20792	-0.39137	-0.29156	-0.06624	0.01375	-0.10515	-0.23366	-0.16359	-0.04266	-0.06999	-0.18796	-0.23475	-0.20945	-0.22786	-0.23574	-0.1962	-0.24342	-0.30546	-0.31013
0.0999	0.01422	0.01638	-0.00956	-0.05767	-0.12858	-0.13705	-0.05169	-0.00902	-0.02496	-0.05065	-0.05711	-0.01594	0.01346	-0.00152	-0.02515	-0.02486	-0.02366	-0.0283	-0.05007	-0.11223	-0.14817	-0.0841	-0.0137	0.01345	0.01321	-0.01696	-0.06805	-0.01696	0.1418	0.09325	-0.20074	-0.38829	-0.29299	-0.07042	0.00797	-0.11033	-0.23672	-0.16383	-0.04161	-0.07144	-0.19127	-0.2348	-0.20601	-0.22446	-0.23477	-0.19761	-0.24373	-0.30197	-0.30419
0.10015	0.01271	0.01382	-0.01071	-0.05491	-0.12086	-0.12938	-0.04976	-0.00901	-0.02323	-0.04762	-0.05444	-0.01662	0.00972	-0.00432	-0.02416	-0.0229	-0.02207	-0.02695	-0.05067	-0.11715	-0.15511	-0.0876	-0.01433	0.0128	0.01272	-0.0155	-0.06382	-0.01341	0.14407	0.09896	-0.19339	-0.38488	-0.29421	-0.07493	0.0016	-0.11555	-0.23923	-0.16367	-0.04055	-0.0728	-0.19416	-0.23444	-0.2023	-0.22071	-0.23333	-0.19868	-0.24382	-0.29833	-0.29817
0.10039	0.01132	0.01152	-0.01161	-0.05211	-0.11331	-0.12179	-0.04773	-0.00893	-0.02156	-0.04465	-0.05175	-0.01712	0.00632	-0.00684	-0.02314	-0.02099	-0.02048	-0.02566	-0.05139	-0.12209	-0.16194	-0.09106	-0.015	0.01212	0.01224	-0.01414	-0.0599	-0.01039	0.14569	0.10433	-0.18592	-0.38117	-0.29519	-0.07972	-0.00533	-0.12081	-0.2412	-0.16313	-0.0395	-0.07406	-0.19664	-0.23367	-0.19838	-0.21663	-0.23144	-0.19942	-0.24369	-0.29455	-0.29209
0.10063	0.01004	0.00947	-0.01227	-0.04928	-0.10594	-0.11433	-0.04561	-0.00881	-0.01997	-0.04175	-0.04904	-0.01745	0.00323	-0.00911	-0.02212	-0.01913	-0.0189	-0.02444	-0.05222	-0.12703	-0.16864	-0.09445	-0.01569	0.01146	0.01179	-0.01286	-0.05628	-0.00789	0.14665	0.10933	-0.17838	-0.37718	-0.29592	-0.08475	-0.0128	-0.12609	-0.24265	-0.16223	-0.03847	-0.07523	-0.19873	-0.23254	-0.19428	-0.21226	-0.22914	-0.19983	-0.24336	-0.29065	-0.28596
0.10087	0.00887	0.00766	-0.01271	-0.04644	-0.09877	-0.10702	-0.04343	-0.00865	-0.01846	-0.03893	-0.04633	-0.01762	0.000447386	-0.01112	-0.02112	-0.01734	-0.01735	-0.02328	-0.05316	-0.13193	-0.17514	-0.09775	-0.01638	0.01082	0.01139	-0.01164	-0.05296	-0.0059	0.14697	0.11393	-0.17082	-0.37293	-0.29638	-0.08999	-0.02077	-0.13141	-0.24358	-0.16098	-0.03747	-0.07631	-0.20042	-0.23107	-0.19004	-0.20764	-0.22642	-0.19992	-0.24283	-0.28664	-0.2798
0.10112	0.0078	0.00606	-0.01296	-0.0436	-0.09181	-0.09988	-0.04121	-0.00845	-0.01704	-0.03622	-0.04364	-0.01766	-0.00204	-0.01291	-0.02013	-0.01563	-0.01584	-0.0222	-0.0542	-0.13678	-0.18142	-0.10093	-0.01705	0.01023	0.01105	-0.01047	-0.04992	-0.00442	0.14665	0.11812	-0.16328	-0.36844	-0.29655	-0.09539	-0.02921	-0.13675	-0.24401	-0.15941	-0.03652	-0.07732	-0.20175	-0.22929	-0.1857	-0.20282	-0.22334	-0.19971	-0.24212	-0.28253	-0.27361
0.10136	0.00682	0.00465	-0.01303	-0.04077	-0.08509	-0.09293	-0.03895	-0.00822	-0.01572	-0.03361	-0.04098	-0.01756	-0.00425	-0.01447	-0.01918	-0.01401	-0.01437	-0.02121	-0.05533	-0.14154	-0.18742	-0.10395	-0.01768	0.00969	0.0108	-0.00933	-0.04716	-0.00342	0.14572	0.12186	-0.1558	-0.36371	-0.29641	-0.1009	-0.03808	-0.1421	-0.24397	-0.15753	-0.03563	-0.07826	-0.20272	-0.22723	-0.18129	-0.19782	-0.21992	-0.19922	-0.24124	-0.27835	-0.26741
0.1016	0.00594	0.00344	-0.01294	-0.03798	-0.07861	-0.0862	-0.03669	-0.00798	-0.0145	-0.03114	-0.03837	-0.01736	-0.0062	-0.01583	-0.01827	-0.01248	-0.01296	-0.0203	-0.05655	-0.1462	-0.19312	-0.1068	-0.01825	0.00923	0.01064	-0.00821	-0.04466	-0.00289	0.1442	0.12516	-0.14843	-0.35877	-0.29593	-0.10648	-0.04732	-0.14747	-0.24346	-0.15537	-0.0348	-0.07913	-0.20336	-0.22492	-0.17685	-0.19269	-0.2162	-0.19847	-0.24022	-0.27409	-0.2612
0.10184	0.00514	0.00239	-0.01271	-0.03522	-0.07238	-0.0797	-0.03442	-0.00774	-0.01339	-0.02879	-0.03582	-0.01705	-0.00791	-0.01699	-0.01739	-0.01104	-0.0116	-0.01947	-0.05787	-0.15072	-0.19848	-0.10946	-0.01876	0.00886	0.01058	-0.0071	-0.04241	-0.0028	0.14211	0.128	-0.14119	-0.35362	-0.2951	-0.11207	-0.05689	-0.15283	-0.24253	-0.15295	-0.03406	-0.07993	-0.20368	-0.22242	-0.17242	-0.18748	-0.21222	-0.19748	-0.23906	-0.26978	-0.25499
0.10209	0.00442	0.00149	-0.01236	-0.03251	-0.06643	-0.07345	-0.03217	-0.00749	-0.01241	-0.0266	-0.03335	-0.01666	-0.00938	-0.01797	-0.01657	-0.0097	-0.01031	-0.01875	-0.05927	-0.15511	-0.20347	-0.1119	-0.01918	0.00859	0.01065	-0.00598	-0.04039	-0.00313	0.13948	0.13037	-0.13411	-0.34826	-0.29388	-0.11761	-0.06673	-0.15818	-0.2412	-0.15031	-0.03338	-0.08067	-0.20373	-0.21974	-0.16804	-0.18223	-0.20803	-0.19628	-0.23779	-0.26543	-0.24879
0.10233	0.00378	0.000743983	-0.01189	-0.02986	-0.06074	-0.06746	-0.02994	-0.00725	-0.01155	-0.02456	-0.03097	-0.0162	-0.01064	-0.01878	-0.01579	-0.00846	-0.00909	-0.01812	-0.06076	-0.15934	-0.20807	-0.1141	-0.01951	0.00843	0.01085	-0.00484	-0.03858	-0.00385	0.13635	0.13226	-0.12722	-0.3427	-0.29226	-0.12307	-0.07677	-0.1635	-0.23949	-0.14746	-0.03279	-0.08136	-0.20352	-0.21693	-0.16373	-0.17696	-0.20366	-0.1949	-0.23642	-0.26106	-0.24259
0.10257	0.0032	0.000127896	-0.01133	-0.02727	-0.05533	-0.06174	-0.02776	-0.00702	-0.01083	-0.02269	-0.02869	-0.01568	-0.0117	-0.01942	-0.01505	-0.00731	-0.00793	-0.01758	-0.06235	-0.1634	-0.21224	-0.11606	-0.01973	0.00839	0.01119	-0.00365	-0.03696	-0.00491	0.13274	0.13369	-0.12053	-0.33694	-0.29021	-0.12837	-0.08697	-0.16879	-0.23744	-0.14443	-0.03227	-0.08198	-0.20307	-0.21403	-0.15953	-0.17173	-0.19916	-0.19336	-0.23496	-0.25668	-0.23642
0.10281	0.00269	-0.000365938	-0.01069	-0.02475	-0.05021	-0.05629	-0.02561	-0.00681	-0.01025	-0.021	-0.02651	-0.01511	-0.01258	-0.01992	-0.01436	-0.00625	-0.00683	-0.01714	-0.06402	-0.16729	-0.21598	-0.11776	-0.01984	0.00848	0.0117	-0.00241	-0.03551	-0.0063	0.12869	0.13464	-0.11405	-0.33098	-0.28771	-0.13348	-0.09725	-0.17401	-0.23508	-0.14125	-0.03183	-0.08253	-0.20241	-0.21107	-0.15545	-0.16656	-0.19458	-0.19168	-0.23344	-0.2523	-0.23027
0.10306	0.00224	-0.000748376	-0.00997	-0.0223	-0.04536	-0.05113	-0.02352	-0.00663	-0.00981	-0.01949	-0.02446	-0.01451	-0.01329	-0.02028	-0.01372	-0.00529	-0.0058	-0.0168	-0.06579	-0.171	-0.21927	-0.11918	-0.01981	0.00872	0.01237	-0.00109	-0.0342	-0.00798	0.12425	0.13514	-0.10781	-0.32481	-0.28474	-0.13833	-0.10753	-0.17915	-0.23243	-0.13793	-0.03145	-0.08301	-0.20156	-0.20807	-0.15152	-0.16149	-0.18994	-0.1899	-0.23187	-0.24794	-0.22415
0.1033	0.00185	-0.00103	-0.00918	-0.01993	-0.0408	-0.04624	-0.02149	-0.00649	-0.00954	-0.01818	-0.02253	-0.01389	-0.01384	-0.02051	-0.01311	-0.0044	-0.00482	-0.01655	-0.06765	-0.17453	-0.2221	-0.12031	-0.01965	0.0091	0.01323	0.000320371	-0.03301	-0.00989	0.11944	0.13518	-0.10179	-0.31843	-0.28128	-0.14288	-0.11776	-0.18418	-0.22953	-0.13451	-0.03112	-0.08342	-0.20053	-0.20507	-0.14775	-0.15653	-0.1853	-0.18804	-0.23025	-0.2436	-0.21806
0.10354	0.00151	-0.00123	-0.00834	-0.01763	-0.03651	-0.04164	-0.01951	-0.00638	-0.00943	-0.01707	-0.02074	-0.01325	-0.01426	-0.02062	-0.01254	-0.00358	-0.0039	-0.01639	-0.06961	-0.17788	-0.22447	-0.12116	-0.01934	0.00965	0.01429	0.00186	-0.03191	-0.01202	0.11431	0.13479	-0.09601	-0.31183	-0.27733	-0.14707	-0.12786	-0.18907	-0.22641	-0.13101	-0.03085	-0.08373	-0.19936	-0.20209	-0.14414	-0.15172	-0.18068	-0.18611	-0.2286	-0.2393	-0.21202
0.10378	0.00122	-0.00135	-0.00746	-0.0154	-0.03249	-0.0373	-0.01759	-0.00632	-0.00949	-0.01618	-0.01909	-0.01261	-0.01455	-0.02063	-0.012	-0.00283	-0.00302	-0.01632	-0.07168	-0.18106	-0.22637	-0.1217	-0.01888	0.01036	0.01557	0.00353	-0.03087	-0.01432	0.10889	0.13397	-0.09047	-0.30501	-0.27286	-0.15087	-0.13775	-0.1938	-0.22309	-0.12746	-0.03061	-0.08395	-0.19805	-0.19914	-0.14071	-0.14705	-0.17611	-0.18413	-0.22694	-0.23506	-0.20603
0.10403	0.000958068	-0.0014	-0.00654	-0.01325	-0.02874	-0.03322	-0.01573	-0.00631	-0.00974	-0.0155	-0.01759	-0.01197	-0.01473	-0.02053	-0.01148	-0.00212	-0.00217	-0.01635	-0.07387	-0.18408	-0.22781	-0.12195	-0.01827	0.01125	0.01709	0.00537	-0.02987	-0.01676	0.10322	0.13274	-0.08515	-0.29795	-0.26787	-0.15423	-0.14737	-0.19834	-0.2196	-0.12387	-0.03042	-0.08407	-0.19661	-0.19625	-0.13744	-0.14255	-0.17162	-0.18213	-0.22526	-0.23088	-0.20011
0.10427	0.000732446	-0.00141	-0.00559	-0.01117	-0.02524	-0.0294	-0.01391	-0.00634	-0.01017	-0.01505	-0.01623	-0.01133	-0.01481	-0.02034	-0.01097	-0.00146	-0.00136	-0.01646	-0.07618	-0.18695	-0.22879	-0.12191	-0.0175	0.01232	0.01885	0.00739	-0.02888	-0.01931	0.09733	0.13112	-0.08006	-0.29065	-0.26235	-0.15712	-0.15664	-0.20265	-0.21595	-0.12027	-0.03024	-0.08407	-0.19505	-0.19341	-0.13433	-0.1382	-0.16723	-0.1801	-0.22357	-0.22678	-0.19426
0.10451	0.000533443	-0.00138	-0.00463	-0.00916	-0.02198	-0.02581	-0.01214	-0.00644	-0.01082	-0.01484	-0.01501	-0.01071	-0.0148	-0.02007	-0.01048	-0.000822725	-0.000558386	-0.01666	-0.07862	-0.18967	-0.22932	-0.12157	-0.01657	0.01356	0.02086	0.00962	-0.02789	-0.02194	0.09127	0.12913	-0.07517	-0.28311	-0.25631	-0.15949	-0.16549	-0.2067	-0.21219	-0.11669	-0.03009	-0.08394	-0.19336	-0.19064	-0.13137	-0.13403	-0.16295	-0.17807	-0.22188	-0.22276	-0.18849
0.10475	0.00035618	-0.00132	-0.00367	-0.00723	-0.01896	-0.02244	-0.01039	-0.00659	-0.01168	-0.01486	-0.01393	-0.01009	-0.01472	-0.01972	-0.00999	-0.000207111	0.000230085	-0.01694	-0.0812	-0.19226	-0.2294	-0.12095	-0.01549	0.01499	0.02314	0.01206	-0.02687	-0.02461	0.08505	0.12679	-0.07049	-0.27532	-0.24975	-0.16133	-0.17387	-0.21045	-0.20832	-0.11314	-0.02996	-0.08368	-0.19156	-0.18792	-0.12854	-0.13001	-0.15879	-0.17604	-0.22019	-0.21883	-0.18283
0.105	0.000196014	-0.00123	-0.00269	-0.00536	-0.01615	-0.01927	-0.00868	-0.00681	-0.01277	-0.01514	-0.01299	-0.00948	-0.01456	-0.0193	-0.0095	0.000398663	0.00102	-0.01731	-0.08393	-0.19474	-0.22906	-0.12004	-0.01427	0.01659	0.0257	0.01472	-0.02581	-0.02731	0.07872	0.12412	-0.06601	-0.26729	-0.24269	-0.16261	-0.18171	-0.21389	-0.20437	-0.10965	-0.02984	-0.08326	-0.18962	-0.18524	-0.12581	-0.12613	-0.15476	-0.17401	-0.21849	-0.215	-0.17728
0.10524	4.85476e-05	-0.00114	-0.00172	-0.00355	-0.01355	-0.0163	-0.00698	-0.0071	-0.0141	-0.01568	-0.01218	-0.00887	-0.01434	-0.01881	-0.009	0.001	0.00181	-0.01776	-0.08681	-0.1971	-0.2283	-0.11885	-0.01291	0.01836	0.02852	0.01763	-0.02469	-0.03002	0.07229	0.12113	-0.06171	-0.25902	-0.23514	-0.16332	-0.18896	-0.21697	-0.20035	-0.10623	-0.02973	-0.08269	-0.18754	-0.1826	-0.12316	-0.1224	-0.15087	-0.17198	-0.21679	-0.21127	-0.17185
0.10548	-8.9638e-05	-0.00103	-0.000748289	-0.00179	-0.01115	-0.0135	-0.00528	-0.00746	-0.0157	-0.0165	-0.0115	-0.00827	-0.01406	-0.01827	-0.00849	0.00161	0.00261	-0.0183	-0.08986	-0.19937	-0.22713	-0.11739	-0.01142	0.02028	0.03163	0.02079	-0.0235	-0.0327	0.0658	0.11786	-0.0576	-0.25052	-0.22712	-0.16346	-0.19557	-0.21967	-0.19628	-0.10291	-0.02962	-0.08194	-0.18531	-0.17998	-0.12057	-0.11879	-0.14711	-0.16994	-0.21506	-0.20763	-0.16655
0.10572	-0.000221716	-0.000927711	0.000218943	-9.24628e-05	-0.00893	-0.01086	-0.00358	-0.0079	-0.01759	-0.0176	-0.01095	-0.00766	-0.01372	-0.01766	-0.00797	0.00224	0.00343	-0.01892	-0.09307	-0.20155	-0.22556	-0.11566	-0.00981	0.02236	0.035	0.0242	-0.02222	-0.03535	0.05927	0.11431	-0.05366	-0.24181	-0.21866	-0.16302	-0.2015	-0.22197	-0.19217	-0.09969	-0.02952	-0.08102	-0.1829	-0.17734	-0.11801	-0.11527	-0.14348	-0.1679	-0.2133	-0.20408	-0.1614
0.10597	-0.000350811	-0.000823567	0.00118	0.00156	-0.00689	-0.00836	-0.00186	-0.00842	-0.01977	-0.019	-0.01052	-0.00705	-0.01334	-0.01701	-0.00743	0.00288	0.00428	-0.01962	-0.09646	-0.20364	-0.22359	-0.11366	-0.00808	0.02457	0.03865	0.02788	-0.02085	-0.03795	0.05272	0.11051	-0.0499	-0.2329	-0.20981	-0.162	-0.20671	-0.22384	-0.18804	-0.09661	-0.02943	-0.0799	-0.1803	-0.17468	-0.11544	-0.11185	-0.13997	-0.16583	-0.2115	-0.20062	-0.1564
0.10621	-0.000479846	-0.000725391	0.00214	0.00316	-0.00501	-0.00598	-0.000116228	-0.00902	-0.02228	-0.02072	-0.01022	-0.00643	-0.01291	-0.01631	-0.00688	0.00354	0.00515	-0.0204	-0.10002	-0.20565	-0.22124	-0.11139	-0.00625	0.02691	0.04256	0.03181	-0.01938	-0.04048	0.04617	0.10648	-0.04631	-0.22382	-0.20059	-0.16042	-0.21119	-0.22526	-0.18391	-0.09366	-0.02935	-0.07858	-0.1775	-0.17197	-0.11283	-0.10848	-0.13657	-0.16374	-0.20962	-0.19723	-0.15156
0.10645	-0.000611697	-0.000636952	0.00309	0.00472	-0.00331	-0.00372	0.00168	-0.00972	-0.02513	-0.02277	-0.01003	-0.0058	-0.01244	-0.01558	-0.0063	0.00423	0.00604	-0.02127	-0.10375	-0.20759	-0.21851	-0.10885	-0.00432	0.02936	0.04673	0.03601	-0.01781	-0.04294	0.03965	0.10223	-0.04289	-0.21459	-0.19107	-0.1583	-0.2149	-0.22623	-0.17976	-0.09085	-0.02927	-0.07706	-0.17447	-0.16917	-0.11017	-0.10515	-0.13326	-0.16159	-0.20766	-0.1939	-0.14688
0.10669	-0.000749182	-0.000561911	0.00403	0.00622	-0.00175	-0.00155	0.00354	-0.0105	-0.02835	-0.02517	-0.00997	-0.00516	-0.01193	-0.01482	-0.00571	0.00495	0.00698	-0.02222	-0.10766	-0.20945	-0.2154	-0.10604	-0.00231	0.0319	0.05113	0.04046	-0.01613	-0.04532	0.03316	0.09778	-0.03965	-0.20524	-0.18127	-0.15567	-0.21784	-0.22671	-0.17562	-0.08821	-0.0292	-0.07532	-0.1712	-0.16628	-0.10741	-0.10184	-0.13003	-0.15937	-0.20559	-0.1906	-0.14237
0.10694	-0.000894898	-0.000503476	0.00497	0.00768	-0.000361395	0.000536105	0.00547	-0.01136	-0.03194	-0.02794	-0.01002	-0.00449	-0.01139	-0.01403	-0.0051	0.0057	0.00794	-0.02325	-0.11174	-0.21123	-0.21192	-0.10295	-0.000202749	0.03452	0.05576	0.04515	-0.01434	-0.0476	0.02673	0.09316	-0.03658	-0.19581	-0.17127	-0.15255	-0.22	-0.22671	-0.17149	-0.08572	-0.02914	-0.07338	-0.16767	-0.16326	-0.10455	-0.09853	-0.12685	-0.15706	-0.20338	-0.18733	-0.13803
0.10718	-0.00105	-0.000464748	0.00589	0.00909	0.000877239	0.00256	0.00751	-0.01231	-0.03592	-0.03109	-0.01019	-0.0038	-0.01082	-0.01323	-0.00448	0.00648	0.00895	-0.02436	-0.11598	-0.21292	-0.20807	-0.09958	0.00198	0.0372	0.06059	0.05008	-0.01246	-0.0498	0.02038	0.08839	-0.03369	-0.18633	-0.16112	-0.14897	-0.22138	-0.22622	-0.16737	-0.08341	-0.02911	-0.07124	-0.16387	-0.16009	-0.10155	-0.09519	-0.12371	-0.15465	-0.201	-0.18407	-0.13385
0.10742	-0.00122	-0.00044865	0.0068	0.01044	0.00196	0.00454	0.00967	-0.01334	-0.04032	-0.03463	-0.01046	-0.00307	-0.01023	-0.01241	-0.00384	0.0073	0.00999	-0.02555	-0.12038	-0.21453	-0.20386	-0.09593	0.00422	0.03991	0.0656	0.05521	-0.0105	-0.05192	0.01412	0.08348	-0.03097	-0.17683	-0.15087	-0.14499	-0.22198	-0.22523	-0.16326	-0.08126	-0.02909	-0.06889	-0.15979	-0.15675	-0.09839	-0.09181	-0.12059	-0.1521	-0.19845	-0.18078	-0.12985
0.10766	-0.00141	-0.00045741	0.00771	0.01174	0.00289	0.00648	0.01196	-0.01444	-0.04514	-0.03857	-0.01083	-0.00231	-0.00962	-0.01158	-0.00318	0.00815	0.01108	-0.02681	-0.12493	-0.21603	-0.19927	-0.092	0.00653	0.04265	0.07077	0.06053	-0.00846	-0.05395	0.00796	0.07846	-0.02843	-0.16736	-0.14059	-0.14064	-0.22183	-0.22374	-0.15917	-0.07928	-0.02911	-0.06634	-0.15542	-0.15322	-0.09506	-0.08838	-0.11746	-0.14941	-0.19568	-0.17745	-0.126
0.1079	-0.00161	-0.000493083	0.00859	0.01297	0.00367	0.0084	0.0144	-0.01562	-0.05041	-0.04293	-0.01129	-0.0015	-0.00898	-0.01075	-0.0025	0.00903	0.01221	-0.02814	-0.12962	-0.21742	-0.19432	-0.08777	0.00889	0.04538	0.07606	0.06601	-0.00638	-0.05591	0.00191	0.07335	-0.02608	-0.15794	-0.13033	-0.13596	-0.22095	-0.22176	-0.15509	-0.07747	-0.02916	-0.06361	-0.15075	-0.14948	-0.09155	-0.08487	-0.1143	-0.14655	-0.19267	-0.17406	-0.12232
0.10815	-0.00183	-0.000557616	0.00946	0.01412	0.00428	0.0103	0.01702	-0.01687	-0.05612	-0.0477	-0.01185	-0.000640697	-0.00831	-0.0099	-0.00181	0.00996	0.01339	-0.02955	-0.13444	-0.21868	-0.18901	-0.08325	0.01129	0.04808	0.08143	0.07161	-0.00426	-0.05781	-0.004	0.06818	-0.0239	-0.14863	-0.12016	-0.13102	-0.21935	-0.2193	-0.15102	-0.07584	-0.02925	-0.0607	-0.14578	-0.14553	-0.08784	-0.08127	-0.1111	-0.1435	-0.18941	-0.17059	-0.11879
0.10839	-0.00207	-0.000652534	0.01031	0.01519	0.00472	0.01221	0.01981	-0.01819	-0.06229	-0.05291	-0.01248	0.000282209	-0.00762	-0.00905	-0.00109	0.01093	0.01463	-0.03101	-0.13937	-0.21979	-0.18332	-0.07845	0.01372	0.05073	0.08685	0.0773	-0.00213	-0.05965	-0.00978	0.06296	-0.02192	-0.13946	-0.11015	-0.12585	-0.21708	-0.21637	-0.14698	-0.07437	-0.02938	-0.05763	-0.14052	-0.14134	-0.08394	-0.07758	-0.10783	-0.14024	-0.18587	-0.16701	-0.1154
0.10863	-0.00233	-0.000779256	0.01113	0.01617	0.00499	0.01411	0.0228	-0.01957	-0.06893	-0.05856	-0.01319	0.00127	-0.00691	-0.00819	-0.00035201	0.01194	0.01593	-0.03253	-0.14439	-0.22074	-0.17728	-0.07335	0.01618	0.05331	0.09229	0.08303	-2.67152e-05	-0.06146	-0.01542	0.05771	-0.02014	-0.13049	-0.10036	-0.12053	-0.21418	-0.21299	-0.14296	-0.07307	-0.02957	-0.05442	-0.13498	-0.13693	-0.07984	-0.07378	-0.10447	-0.13676	-0.18204	-0.16331	-0.11215
0.10887	-0.00262	-0.000939285	0.01193	0.01704	0.00508	0.01602	0.02598	-0.02101	-0.07604	-0.06465	-0.01396	0.00235	-0.00616	-0.00732	0.000418515	0.013	0.0173	-0.0341	-0.14949	-0.22152	-0.17087	-0.06797	0.01865	0.05579	0.09769	0.08877	0.00203	-0.06324	-0.0209	0.05246	-0.01856	-0.12175	-0.09084	-0.11509	-0.21068	-0.20917	-0.13895	-0.07192	-0.02982	-0.0511	-0.12916	-0.13228	-0.07555	-0.06988	-0.10102	-0.13305	-0.17789	-0.15946	-0.10903
0.10912	-0.00293	-0.00113	0.01269	0.01779	0.00497	0.01794	0.02938	-0.02251	-0.08364	-0.07118	-0.0148	0.0035	-0.00537	-0.00642	0.00123	0.01413	0.01875	-0.0357	-0.15464	-0.2221	-0.16411	-0.06231	0.02112	0.05815	0.10301	0.09446	0.004	-0.06502	-0.02622	0.04721	-0.01719	-0.11328	-0.08167	-0.10962	-0.20665	-0.20494	-0.13497	-0.07092	-0.03012	-0.04767	-0.12309	-0.12741	-0.07108	-0.06588	-0.09746	-0.1291	-0.17343	-0.15546	-0.10602
0.10936	-0.00327	-0.00137	0.0134	0.01841	0.00464	0.01987	0.03299	-0.02406	-0.09171	-0.07816	-0.01568	0.00475	-0.00454	-0.0055	0.00208	0.01531	0.02029	-0.03732	-0.15983	-0.22247	-0.15701	-0.05639	0.02358	0.06035	0.10821	0.10005	0.00585	-0.06681	-0.03138	0.04199	-0.01605	-0.10514	-0.0729	-0.10416	-0.20212	-0.20033	-0.131	-0.07006	-0.03049	-0.04417	-0.11679	-0.12232	-0.06645	-0.06178	-0.09379	-0.1249	-0.16864	-0.1513	-0.10312
0.1096	-0.00363	-0.00164	0.01408	0.01886	0.00409	0.02179	0.03682	-0.02567	-0.10026	-0.08558	-0.0166	0.0061	-0.00367	-0.00454	0.00298	0.01657	0.02193	-0.03897	-0.16504	-0.22263	-0.14958	-0.05021	0.02601	0.06238	0.11324	0.10549	0.00755	-0.06864	-0.03636	0.03682	-0.01513	-0.09737	-0.06459	-0.09878	-0.19717	-0.19536	-0.12705	-0.06932	-0.03091	-0.04062	-0.11029	-0.11703	-0.06168	-0.05759	-0.08999	-0.12045	-0.16353	-0.14695	-0.10031
0.10984	-0.00402	-0.00195	0.01469	0.01914	0.00329	0.02371	0.04085	-0.02732	-0.10928	-0.09342	-0.01755	0.00756	-0.00275	-0.00354	0.00395	0.0179	0.02366	-0.04061	-0.17025	-0.22256	-0.14185	-0.04381	0.02839	0.06422	0.11805	0.11073	0.00906	-0.07051	-0.04116	0.03171	-0.01445	-0.09	-0.0568	-0.09354	-0.19185	-0.19006	-0.12312	-0.06868	-0.03139	-0.03704	-0.10361	-0.11157	-0.0568	-0.05333	-0.08607	-0.11575	-0.15809	-0.14243	-0.09759
0.11009	-0.00444	-0.00231	0.01524	0.01922	0.00222	0.02562	0.04509	-0.02901	-0.11875	-0.10168	-0.01851	0.00913	-0.00177	-0.00249	0.00499	0.0193	0.0255	-0.04225	-0.17543	-0.22226	-0.13384	-0.03721	0.03071	0.06584	0.12261	0.11573	0.01034	-0.07245	-0.04578	0.02667	-0.01402	-0.08307	-0.04956	-0.0885	-0.18621	-0.18448	-0.1192	-0.06814	-0.03192	-0.03346	-0.0968	-0.10596	-0.05183	-0.04902	-0.08203	-0.11081	-0.15233	-0.13773	-0.09495
0.11033	-0.00488	-0.00271	0.01571	0.01909	0.000870298	0.0275	0.04954	-0.03074	-0.12865	-0.11033	-0.01948	0.01082	-0.000740705	-0.00137	0.00611	0.02079	0.02746	-0.04388	-0.18058	-0.22173	-0.12558	-0.03044	0.03294	0.06722	0.12687	0.12042	0.01137	-0.07448	-0.05022	0.02172	-0.01385	-0.07662	-0.04294	-0.08372	-0.18033	-0.17863	-0.11529	-0.06766	-0.03248	-0.02989	-0.08988	-0.10023	-0.04682	-0.04467	-0.07788	-0.10564	-0.14627	-0.13285	-0.09237
0.11057	-0.00536	-0.00315	0.0161	0.01872	-0.000784388	0.02933	0.05417	-0.0325	-0.13895	-0.11935	-0.02045	0.01263	0.000355123	-0.000175583	0.00732	0.02236	0.02952	-0.04549	-0.18568	-0.22098	-0.11711	-0.02354	0.03507	0.06835	0.13079	0.12477	0.01211	-0.07661	-0.05447	0.01687	-0.01393	-0.07067	-0.03694	-0.07923	-0.17427	-0.17255	-0.11139	-0.06723	-0.03307	-0.02635	-0.0829	-0.09441	-0.0418	-0.04031	-0.07362	-0.10025	-0.13993	-0.1278	-0.08985
0.11081	-0.00586	-0.00365	0.0164	0.0181	-0.00276	0.03111	0.05898	-0.03428	-0.14963	-0.12871	-0.0214	0.01456	0.00152	0.0011	0.00863	0.02401	0.0317	-0.04707	-0.19072	-0.22001	-0.10846	-0.01654	0.03708	0.06921	0.13435	0.12873	0.01253	-0.07885	-0.05852	0.01213	-0.01428	-0.06525	-0.03162	-0.0751	-0.16808	-0.16629	-0.1075	-0.06682	-0.03366	-0.02286	-0.07589	-0.08854	-0.0368	-0.03598	-0.06929	-0.09466	-0.13332	-0.1226	-0.08738
0.11106	-0.00639	-0.00419	0.0166	0.01721	-0.00508	0.03281	0.06395	-0.03607	-0.16065	-0.13838	-0.02232	0.01661	0.00275	0.00246	0.01003	0.02573	0.03399	-0.04861	-0.19569	-0.21883	-0.09969	-0.0095	0.03893	0.0698	0.13752	0.13226	0.0126	-0.08123	-0.06239	0.00751	-0.01491	-0.06038	-0.02699	-0.07136	-0.16184	-0.15988	-0.10361	-0.06642	-0.03425	-0.01943	-0.06889	-0.08266	-0.03188	-0.03169	-0.06488	-0.0889	-0.12648	-0.11726	-0.08496
0.1113	-0.00695	-0.00478	0.0167	0.01603	-0.00775	0.03443	0.06906	-0.03786	-0.17197	-0.14832	-0.0232	0.01878	0.00405	0.00393	0.01154	0.02752	0.03638	-0.05011	-0.20057	-0.21746	-0.09084	-0.00246	0.04061	0.0701	0.14028	0.13533	0.0123	-0.08375	-0.06607	0.00302	-0.01581	-0.05608	-0.02306	-0.06805	-0.15559	-0.15334	-0.09972	-0.066	-0.03481	-0.01608	-0.06194	-0.07679	-0.02705	-0.02747	-0.06042	-0.08299	-0.11944	-0.1118	-0.08259
0.11154	-0.00754	-0.00542	0.01669	0.01455	-0.01079	0.03593	0.07428	-0.03965	-0.18355	-0.1585	-0.02404	0.02107	0.00542	0.0055	0.01315	0.02938	0.03888	-0.05157	-0.20537	-0.21594	-0.08198	0.00452	0.0421	0.07013	0.14262	0.13791	0.01161	-0.08642	-0.06955	-0.00134	-0.01698	-0.05235	-0.01984	-0.0652	-0.14939	-0.14673	-0.09584	-0.06553	-0.03532	-0.0128	-0.05506	-0.07097	-0.02238	-0.02337	-0.05593	-0.07695	-0.11222	-0.10624	-0.08025
0.11178	-0.00816	-0.0061	0.01657	0.01276	-0.01422	0.03729	0.0796	-0.04144	-0.19533	-0.16886	-0.02483	0.02346	0.00686	0.00718	0.01488	0.03129	0.04147	-0.05298	-0.21007	-0.21427	-0.07315	0.01139	0.04337	0.06987	0.14452	0.13999	0.01052	-0.08926	-0.07283	-0.00554	-0.01843	-0.04922	-0.01735	-0.06284	-0.1433	-0.14007	-0.09195	-0.06499	-0.03575	-0.00962	-0.04831	-0.06524	-0.01788	-0.0194	-0.05144	-0.07082	-0.10487	-0.1006	-0.07796
0.11203	-0.0088	-0.00682	0.01634	0.01065	-0.01805	0.0385	0.08498	-0.04321	-0.20728	-0.17937	-0.02557	0.02595	0.00837	0.00899	0.01671	0.03324	0.04414	-0.05433	-0.21467	-0.2125	-0.06444	0.01808	0.0444	0.06935	0.14601	0.14155	0.009	-0.09226	-0.07592	-0.00959	-0.02016	-0.04667	-0.01557	-0.06101	-0.13738	-0.1334	-0.08806	-0.06436	-0.03609	-0.00652	-0.0417	-0.05963	-0.01361	-0.0156	-0.04696	-0.06463	-0.09743	-0.09491	-0.0757
0.11227	-0.00947	-0.00759	0.01599	0.00821	-0.0223	0.03952	0.0904	-0.04496	-0.21933	-0.18998	-0.02625	0.02853	0.00996	0.01092	0.01866	0.03522	0.04689	-0.05562	-0.21917	-0.21065	-0.05589	0.02454	0.04516	0.06856	0.14707	0.14259	0.00707	-0.09542	-0.07882	-0.01347	-0.02216	-0.0447	-0.0145	-0.05971	-0.13165	-0.12674	-0.08416	-0.0636	-0.0363	-0.00352	-0.03527	-0.05418	-0.00959	-0.012	-0.04253	-0.05841	-0.08994	-0.0892	-0.07348
0.11251	-0.01017	-0.0084	0.01553	0.00543	-0.02697	0.04034	0.09581	-0.04668	-0.23142	-0.20064	-0.02687	0.03119	0.0116	0.01299	0.02073	0.03722	0.04971	-0.05684	-0.22356	-0.20876	-0.04758	0.03069	0.04564	0.06752	0.14774	0.1431	0.00471	-0.09876	-0.08151	-0.01719	-0.02442	-0.04331	-0.01414	-0.05897	-0.12618	-0.12013	-0.08025	-0.0627	-0.03635	-0.00059969	-0.02905	-0.04891	-0.00586	-0.00863	-0.03818	-0.0522	-0.08244	-0.0835	-0.0713
0.11275	-0.01089	-0.00925	0.01496	0.00231	-0.03208	0.04093	0.10119	-0.04836	-0.2435	-0.21129	-0.02742	0.0339	0.01331	0.01519	0.0229	0.03923	0.05257	-0.058	-0.22785	-0.20687	-0.03958	0.03649	0.0458	0.06625	0.14804	0.1431	0.00194	-0.10226	-0.084	-0.02074	-0.02693	-0.04249	-0.01445	-0.05879	-0.12099	-0.1136	-0.07633	-0.06162	-0.03623	0.00224	-0.02305	-0.04385	-0.00244	-0.00552	-0.03393	-0.04603	-0.07498	-0.07782	-0.06915
0.113	-0.01164	-0.01014	0.01428	-0.00115	-0.03763	0.04126	0.10651	-0.05	-0.2555	-0.22187	-0.02792	0.03666	0.01507	0.01753	0.02519	0.04123	0.05548	-0.05908	-0.23202	-0.20503	-0.03194	0.04187	0.04562	0.06477	0.14801	0.14261	-0.00125	-0.10592	-0.0863	-0.0241	-0.02969	-0.04222	-0.01541	-0.05918	-0.11613	-0.10717	-0.07238	-0.06034	-0.03589	0.00501	-0.0173	-0.03904	0.000627878	-0.00269	-0.02981	-0.03994	-0.06759	-0.07221	-0.06704
0.11324	-0.01242	-0.01108	0.01349	-0.00495	-0.04363	0.04131	0.11172	-0.05158	-0.26735	-0.23233	-0.02834	0.03943	0.01688	0.02002	0.02759	0.04321	0.05841	-0.0601	-0.2361	-0.20326	-0.02474	0.04678	0.04509	0.0631	0.14767	0.14165	-0.00483	-0.10973	-0.08839	-0.02728	-0.03268	-0.04247	-0.01701	-0.06014	-0.11163	-0.10087	-0.06841	-0.05885	-0.03531	0.00772	-0.01182	-0.0345	0.00332	-0.000178338	-0.02585	-0.03397	-0.06032	-0.0667	-0.06498
0.11348	-0.01323	-0.01205	0.0126	-0.00908	-0.05007	0.04107	0.1168	-0.05309	-0.27898	-0.24261	-0.02871	0.04222	0.01873	0.02264	0.03008	0.04515	0.06135	-0.06104	-0.24007	-0.20162	-0.01804	0.05115	0.0442	0.06128	0.14708	0.14026	-0.00878	-0.11367	-0.09029	-0.03027	-0.03588	-0.04322	-0.01919	-0.06167	-0.1075	-0.09471	-0.06442	-0.05711	-0.03447	0.0104	-0.00661	-0.03026	0.00563	0.00201	-0.02208	-0.02815	-0.05321	-0.0613	-0.06297
0.11372	-0.01408	-0.01306	0.01161	-0.01353	-0.05694	0.04051	0.12172	-0.05452	-0.29033	-0.25265	-0.02901	0.04498	0.02061	0.0254	0.03268	0.04703	0.06427	-0.06191	-0.24395	-0.20014	-0.01188	0.05495	0.04292	0.05933	0.14629	0.13847	-0.01308	-0.11773	-0.09198	-0.03307	-0.03928	-0.04445	-0.02193	-0.06373	-0.10377	-0.08872	-0.0604	-0.05511	-0.03333	0.01307	-0.00168	-0.02632	0.00753	0.00385	-0.01852	-0.02253	-0.0463	-0.05605	-0.061
0.11397	-0.01495	-0.01411	0.01052	-0.0183	-0.06423	0.03963	0.12645	-0.05586	-0.30131	-0.26238	-0.02925	0.04771	0.0225	0.0283	0.03536	0.04884	0.06717	-0.06271	-0.24774	-0.19886	-0.00633	0.05813	0.04126	0.05729	0.14537	0.13634	-0.01769	-0.1219	-0.09348	-0.03568	-0.04287	-0.04613	-0.02519	-0.06633	-0.10046	-0.08293	-0.05635	-0.05283	-0.03188	0.01574	0.00298	-0.02272	0.009	0.00533	-0.0152	-0.01712	-0.03963	-0.05098	-0.0591
0.11421	-0.01587	-0.01521	0.00935	-0.02336	-0.07193	0.03841	0.13097	-0.05709	-0.31187	-0.27176	-0.02944	0.05037	0.02441	0.03132	0.03811	0.05056	0.07002	-0.06344	-0.25145	-0.19781	-0.00142	0.06065	0.0392	0.0552	0.14436	0.13391	-0.02258	-0.12615	-0.09477	-0.03809	-0.04662	-0.04822	-0.02892	-0.06944	-0.09756	-0.07734	-0.05227	-0.05027	-0.0301	0.01845	0.00735	-0.01947	0.01005	0.00643	-0.01215	-0.01197	-0.03324	-0.0461	-0.05725
0.11445	-0.01682	-0.01636	0.00809	-0.02869	-0.08002	0.03686	0.13525	-0.05819	-0.32192	-0.28071	-0.02956	0.05296	0.02631	0.03446	0.04093	0.05216	0.0728	-0.0641	-0.25507	-0.19704	0.00281	0.06249	0.03676	0.0531	0.14334	0.13124	-0.02772	-0.13046	-0.09587	-0.04031	-0.05052	-0.05071	-0.03308	-0.07302	-0.0951	-0.07197	-0.04816	-0.0474	-0.02796	0.0212	0.01146	-0.01656	0.01066	0.00716	-0.00937	-0.0071	-0.02714	-0.04145	-0.05548
0.11469	-0.01781	-0.01755	0.00676	-0.03429	-0.08848	0.03495	0.13928	-0.05914	-0.3314	-0.28919	-0.02963	0.05544	0.0282	0.03771	0.04379	0.05363	0.07548	-0.06471	-0.25861	-0.19656	0.00632	0.06363	0.03392	0.05103	0.14236	0.12838	-0.03305	-0.13481	-0.09676	-0.04233	-0.05454	-0.05356	-0.03764	-0.07706	-0.09306	-0.06683	-0.04402	-0.04424	-0.02546	0.02404	0.01531	-0.01402	0.01084	0.00751	-0.00689	-0.00253	-0.02137	-0.03703	-0.05377
0.11494	-0.01885	-0.01879	0.00536	-0.04012	-0.09728	0.03271	0.14305	-0.05992	-0.34025	-0.29714	-0.02965	0.05781	0.03006	0.04106	0.04667	0.05494	0.07805	-0.06527	-0.26208	-0.19638	0.00911	0.06405	0.03071	0.04902	0.14151	0.1254	-0.03855	-0.13916	-0.09744	-0.04414	-0.05867	-0.05675	-0.04257	-0.08153	-0.09145	-0.06193	-0.03986	-0.04076	-0.02258	0.02698	0.01891	-0.01183	0.0106	0.00748	-0.00473	0.0017	-0.01596	-0.03287	-0.05214
0.11518	-0.01994	-0.0201	0.00388	-0.04616	-0.10639	0.03014	0.14655	-0.06051	-0.3484	-0.30452	-0.02961	0.06003	0.03188	0.0445	0.04957	0.05608	0.08048	-0.06578	-0.26547	-0.19654	0.01115	0.06376	0.02714	0.04712	0.14083	0.12235	-0.04415	-0.1435	-0.09792	-0.04574	-0.06287	-0.06025	-0.04782	-0.08639	-0.09026	-0.05728	-0.03566	-0.03695	-0.01931	0.03005	0.02228	-0.01001	0.00993	0.00706	-0.0029	0.00559	-0.01092	-0.02898	-0.05059
0.11542	-0.02108	-0.02147	0.00235	-0.05239	-0.11578	0.02723	0.14977	-0.06088	-0.3558	-0.31127	-0.02953	0.0621	0.03365	0.048	0.05245	0.05703	0.08274	-0.06625	-0.26878	-0.19703	0.01245	0.06274	0.02322	0.04537	0.14039	0.11929	-0.04983	-0.14779	-0.09817	-0.04711	-0.06712	-0.06403	-0.05336	-0.09162	-0.08949	-0.0529	-0.03144	-0.03283	-0.01564	0.03327	0.02545	-0.00854	0.00884	0.00626	-0.00141	0.0091	-0.00627	-0.02536	-0.04912
0.11566	-0.02229	-0.02291	0.000751584	-0.05879	-0.12543	0.02401	0.15272	-0.06102	-0.36238	-0.31735	-0.02938	0.06401	0.03535	0.05156	0.0553	0.05776	0.08483	-0.06668	-0.27201	-0.19786	0.01301	0.06103	0.01897	0.0438	0.14025	0.11628	-0.05554	-0.152	-0.0982	-0.04824	-0.07139	-0.06806	-0.05917	-0.0972	-0.08912	-0.04877	-0.02718	-0.02837	-0.01157	0.03665	0.02841	-0.00743	0.00734	0.00508	-0.000267971	0.01224	-0.00202	-0.02203	-0.04775
0.11591	-0.02356	-0.02444	-0.000907134	-0.06533	-0.13529	0.02049	0.1554	-0.06091	-0.36812	-0.32273	-0.02918	0.06573	0.03698	0.05514	0.0581	0.05827	0.08671	-0.06709	-0.27515	-0.19902	0.01285	0.05864	0.01441	0.04244	0.14046	0.11336	-0.06124	-0.15611	-0.098	-0.04912	-0.07565	-0.07232	-0.06522	-0.10308	-0.08915	-0.0449	-0.02288	-0.02358	-0.00709	0.04022	0.03121	-0.00666	0.00544	0.00351	0.000502562	0.01499	0.00183	-0.019	-0.04646
0.11615	-0.0249	-0.02606	-0.00263	-0.07198	-0.14533	0.0167	0.15781	-0.06052	-0.37296	-0.32736	-0.02892	0.06726	0.0385	0.05872	0.06081	0.05855	0.08838	-0.06748	-0.27821	-0.20051	0.012	0.05559	0.00958	0.04133	0.14106	0.1106	-0.06689	-0.16009	-0.09757	-0.04973	-0.07986	-0.07678	-0.07148	-0.10925	-0.08956	-0.0413	-0.01854	-0.01845	-0.00221	0.044	0.03385	-0.00624	0.00315	0.00156	0.000894402	0.01733	0.00527	-0.01625	-0.04526
0.11639	-0.02631	-0.02778	-0.00441	-0.07873	-0.15552	0.01264	0.15997	-0.05984	-0.37687	-0.33122	-0.02859	0.06859	0.03992	0.06229	0.06341	0.05858	0.08981	-0.06785	-0.28117	-0.2023	0.01048	0.05193	0.00449	0.04047	0.14209	0.10802	-0.07246	-0.16393	-0.09688	-0.05006	-0.08399	-0.08142	-0.07792	-0.11567	-0.09033	-0.03796	-0.01416	-0.01298	0.00307	0.04798	0.03635	-0.00616	0.000456813	-0.000774066	0.0008972	0.01926	0.0083	-0.01379	-0.04415
0.11663	-0.0278	-0.02961	-0.00626	-0.08556	-0.16581	0.00836	0.1619	-0.05886	-0.37982	-0.33428	-0.02817	0.06971	0.04122	0.0658	0.06589	0.05836	0.091	-0.06821	-0.28401	-0.20437	0.00835	0.04768	-0.000821751	0.0399	0.14357	0.10566	-0.07793	-0.16761	-0.09596	-0.05008	-0.08801	-0.0862	-0.08452	-0.12232	-0.09145	-0.03489	-0.00973	-0.00717	0.00875	0.05219	0.03872	-0.00642	-0.00262	-0.00349	0.000500976	0.02078	0.01094	-0.01161	-0.04313
0.11688	-0.02938	-0.03156	-0.00818	-0.09244	-0.17617	0.00387	0.1636	-0.05755	-0.3818	-0.33651	-0.02766	0.07062	0.04236	0.06923	0.0682	0.05788	0.09194	-0.06857	-0.28674	-0.20669	0.00563	0.0429	-0.00632	0.03962	0.14553	0.10355	-0.08325	-0.1711	-0.09478	-0.04979	-0.09186	-0.09109	-0.09126	-0.12916	-0.0929	-0.03207	-0.00525	-0.00102	0.01482	0.05661	0.04098	-0.00701	-0.00608	-0.0066	-0.000303436	0.02188	0.01317	-0.0097	-0.04219
0.11712	-0.03104	-0.03364	-0.01018	-0.09935	-0.18657	-0.00079803	0.16509	-0.05592	-0.38278	-0.33789	-0.02705	0.07133	0.04335	0.07255	0.07034	0.05715	0.09263	-0.06892	-0.28932	-0.20923	0.00239	0.03765	-0.01199	0.03964	0.14799	0.10172	-0.08843	-0.17439	-0.09336	-0.04917	-0.09553	-0.09608	-0.09811	-0.13616	-0.09466	-0.0295	-0.000721011	0.00547	0.02126	0.06126	0.04312	-0.00794	-0.00992	-0.01009	-0.00152	0.02256	0.01502	-0.00806	-0.04134
0.11736	-0.0328	-0.03585	-0.01226	-0.10629	-0.19695	-0.00561	0.16639	-0.05397	-0.38278	-0.33842	-0.0263	0.07182	0.04415	0.07573	0.07227	0.05617	0.09305	-0.06927	-0.29174	-0.21193	-0.0013	0.03196	-0.01778	0.03997	0.15093	0.10016	-0.09344	-0.17749	-0.09168	-0.04821	-0.09897	-0.10113	-0.10506	-0.1433	-0.0967	-0.02717	0.00386	0.01228	0.02805	0.06612	0.04517	-0.00921	-0.01413	-0.01396	-0.00316	0.02281	0.0165	-0.00665	-0.04055
0.1176	-0.03464	-0.03821	-0.01444	-0.11323	-0.2073	-0.01053	0.16752	-0.05168	-0.38178	-0.33807	-0.02542	0.07211	0.04475	0.07873	0.07398	0.05495	0.09321	-0.06961	-0.29398	-0.21477	-0.0054	0.02592	-0.02366	0.04061	0.15437	0.09891	-0.09827	-0.18037	-0.08975	-0.0469	-0.10216	-0.10622	-0.11209	-0.15054	-0.099	-0.02507	0.00851	0.01942	0.03519	0.07117	0.04712	-0.0108	-0.01871	-0.01822	-0.00522	0.02265	0.01762	-0.00549	-0.03984
0.11785	-0.03657	-0.04072	-0.01672	-0.12017	-0.21757	-0.01554	0.16848	-0.04906	-0.3798	-0.33684	-0.02437	0.0722	0.04513	0.08151	0.07544	0.05349	0.09312	-0.06995	-0.29601	-0.21767	-0.00982	0.01957	-0.02959	0.04154	0.15828	0.09794	-0.10293	-0.18304	-0.08758	-0.04521	-0.10505	-0.11133	-0.11918	-0.15787	-0.10154	-0.02319	0.01321	0.02686	0.04262	0.07641	0.04898	-0.01273	-0.02365	-0.02284	-0.0077	0.02208	0.0184	-0.00454	-0.03919
0.11809	-0.03859	-0.04338	-0.01912	-0.12709	-0.22772	-0.02061	0.16928	-0.04614	-0.37686	-0.33474	-0.02313	0.07209	0.04526	0.08406	0.07664	0.05182	0.09277	-0.07028	-0.29781	-0.22059	-0.0145	0.01299	-0.03555	0.04276	0.16265	0.09726	-0.10741	-0.18549	-0.08516	-0.04316	-0.10763	-0.11644	-0.12632	-0.16526	-0.10429	-0.02151	0.01797	0.0346	0.05033	0.0818	0.05073	-0.01499	-0.02894	-0.02783	-0.01061	0.0211	0.01885	-0.00379	-0.0386
0.11833	-0.0407	-0.0462	-0.02163	-0.134	-0.23774	-0.02571	0.16995	-0.04291	-0.37299	-0.33177	-0.02169	0.07179	0.04513	0.08632	0.07756	0.04995	0.09219	-0.0706	-0.29935	-0.22347	-0.01935	0.00625	-0.0415	0.04426	0.16744	0.09685	-0.11173	-0.18774	-0.08251	-0.04071	-0.10985	-0.12152	-0.1335	-0.17269	-0.10723	-0.02003	0.0228	0.04261	0.05829	0.08732	0.05238	-0.01758	-0.03458	-0.03319	-0.01393	0.01972	0.01899	-0.00323	-0.03806
0.11857	-0.04289	-0.04916	-0.02427	-0.14087	-0.24758	-0.03083	0.17047	-0.0394	-0.36821	-0.32793	-0.02003	0.07132	0.04472	0.08828	0.0782	0.04791	0.09137	-0.0709	-0.30061	-0.22624	-0.0243	-0.000600023	-0.0474	0.04601	0.17262	0.09669	-0.11589	-0.18978	-0.07962	-0.03787	-0.1117	-0.12656	-0.14071	-0.18013	-0.11033	-0.01872	0.0277	0.05088	0.06644	0.09294	0.05391	-0.02049	-0.04056	-0.03888	-0.01766	0.01795	0.01884	-0.00284	-0.03756
0.11882	-0.04514	-0.05225	-0.02705	-0.14772	-0.25724	-0.03594	0.17086	-0.03564	-0.36256	-0.32324	-0.01813	0.07067	0.04401	0.0899	0.07854	0.04572	0.09035	-0.07118	-0.30157	-0.22885	-0.02927	-0.00748	-0.05323	0.04798	0.17814	0.09674	-0.1199	-0.19163	-0.0765	-0.03464	-0.11314	-0.13153	-0.14795	-0.18759	-0.11358	-0.01756	0.03266	0.05938	0.07475	0.09861	0.05532	-0.02373	-0.04687	-0.04492	-0.02179	0.01582	0.01843	-0.00261	-0.03711
0.11906	-0.04745	-0.05548	-0.02995	-0.15452	-0.26668	-0.04104	0.1711	-0.03165	-0.3561	-0.31771	-0.01596	0.06986	0.04297	0.09115	0.07859	0.04341	0.08914	-0.07143	-0.30219	-0.23124	-0.03419	-0.01432	-0.05895	0.05016	0.18395	0.09699	-0.12379	-0.1933	-0.07318	-0.031	-0.11416	-0.13643	-0.15521	-0.19504	-0.11695	-0.01655	0.03769	0.06809	0.08318	0.10431	0.05659	-0.02729	-0.05349	-0.05127	-0.02631	0.01332	0.01776	-0.00252	-0.0367
0.1193	-0.0498	-0.05881	-0.03299	-0.1613	-0.2759	-0.04611	0.17119	-0.02749	-0.34887	-0.31138	-0.01352	0.06889	0.04159	0.09201	0.07834	0.04102	0.08777	-0.07165	-0.30246	-0.23334	-0.03899	-0.02108	-0.06453	0.0525	0.19	0.09738	-0.12757	-0.19479	-0.06965	-0.02696	-0.11472	-0.14123	-0.1625	-0.20248	-0.12042	-0.01565	0.04279	0.07697	0.09167	0.10998	0.0577	-0.03117	-0.06042	-0.05793	-0.0312	0.01049	0.01687	-0.00255	-0.03632
0.11954	-0.05218	-0.06223	-0.03617	-0.16805	-0.28488	-0.05115	0.17111	-0.02317	-0.34094	-0.30428	-0.0108	0.06779	0.03987	0.09245	0.07782	0.0386	0.08626	-0.07182	-0.30235	-0.23512	-0.04361	-0.02768	-0.06996	0.05498	0.19622	0.09789	-0.13127	-0.19614	-0.06593	-0.02252	-0.11482	-0.14592	-0.16982	-0.2099	-0.12397	-0.01485	0.04796	0.086	0.10018	0.11559	0.05863	-0.03538	-0.06763	-0.06487	-0.03643	0.00734	0.01576	-0.00271	-0.03597
0.11979	-0.05456	-0.06571	-0.03949	-0.17478	-0.29363	-0.05616	0.17085	-0.01876	-0.33235	-0.29642	-0.00777	0.06655	0.03777	0.09248	0.07702	0.03618	0.08464	-0.07194	-0.30185	-0.23651	-0.04796	-0.03408	-0.0752	0.05756	0.20254	0.09847	-0.13491	-0.19735	-0.06205	-0.01769	-0.11442	-0.15046	-0.17715	-0.21729	-0.12757	-0.01413	0.05318	0.09515	0.10866	0.12108	0.05937	-0.0399	-0.07511	-0.07207	-0.04199	0.00388	0.01447	-0.00296	-0.03564
0.12003	-0.05692	-0.06923	-0.04294	-0.1815	-0.30214	-0.06114	0.17038	-0.01431	-0.32318	-0.28786	-0.00444	0.06519	0.03531	0.09206	0.07597	0.03381	0.08294	-0.07199	-0.30095	-0.23748	-0.05202	-0.04023	-0.08023	0.06021	0.20891	0.09907	-0.13851	-0.19845	-0.05803	-0.01247	-0.11351	-0.15485	-0.18451	-0.22466	-0.13122	-0.01347	0.05847	0.10436	0.11707	0.12643	0.0599	-0.04472	-0.08284	-0.07949	-0.04785	0.000154913	0.013	-0.00329	-0.03532
0.12027	-0.05925	-0.07274	-0.04651	-0.18822	-0.31042	-0.0661	0.1697	-0.00985	-0.31351	-0.27862	-0.000806874	0.06371	0.03247	0.09121	0.0747	0.03155	0.0812	-0.07197	-0.29962	-0.23798	-0.05571	-0.04609	-0.08503	0.06288	0.21526	0.09965	-0.14208	-0.19944	-0.05388	-0.00688	-0.11208	-0.15905	-0.19189	-0.23199	-0.13489	-0.01284	0.06381	0.11361	0.12534	0.13158	0.0602	-0.04985	-0.09078	-0.0871	-0.05397	-0.00383	0.01139	-0.00369	-0.03501
0.12051	-0.06151	-0.07624	-0.05021	-0.19495	-0.31846	-0.07105	0.16876	-0.00546	-0.30339	-0.26877	0.00313	0.06213	0.02925	0.08991	0.07324	0.02942	0.07945	-0.07187	-0.29786	-0.23798	-0.059	-0.0516	-0.08959	0.06555	0.22151	0.10018	-0.14566	-0.20036	-0.04962	-0.000934185	-0.11011	-0.16305	-0.19928	-0.23929	-0.13856	-0.01224	0.06919	0.12285	0.13344	0.13649	0.06026	-0.05526	-0.09891	-0.09486	-0.06033	-0.00803	0.00964	-0.00415	-0.0347
0.12076	-0.06368	-0.07966	-0.05403	-0.20171	-0.3263	-0.07599	0.16754	-0.00118	-0.29291	-0.25835	0.00736	0.06047	0.02566	0.08819	0.07162	0.0275	0.07773	-0.07168	-0.29566	-0.23744	-0.06184	-0.05675	-0.09389	0.06818	0.22762	0.1006	-0.14924	-0.2012	-0.04529	0.00535	-0.10759	-0.16681	-0.20668	-0.24655	-0.14221	-0.01163	0.07461	0.13203	0.14131	0.14114	0.06005	-0.06094	-0.10719	-0.10274	-0.06687	-0.01245	0.00777	-0.00466	-0.03438
0.121	-0.06574	-0.08298	-0.05795	-0.20851	-0.33392	-0.08095	0.166	0.00292	-0.28213	-0.24741	0.01188	0.05872	0.02172	0.08606	0.06988	0.02582	0.07607	-0.07138	-0.29301	-0.23636	-0.0642	-0.06149	-0.09791	0.07074	0.2335	0.1009	-0.15285	-0.202	-0.04091	0.01196	-0.10452	-0.17032	-0.21408	-0.25377	-0.14582	-0.011	0.08004	0.14111	0.14891	0.14547	0.05958	-0.06688	-0.11558	-0.11067	-0.07357	-0.01703	0.0058	-0.0052	-0.03404
0.12124	-0.06766	-0.08615	-0.06196	-0.21535	-0.34135	-0.08594	0.16413	0.00678	-0.27115	-0.23601	0.01667	0.0569	0.01743	0.08354	0.06807	0.02443	0.0745	-0.07097	-0.28993	-0.23469	-0.06605	-0.06581	-0.10164	0.07319	0.23911	0.10103	-0.15649	-0.20275	-0.0365	0.01885	-0.1009	-0.17355	-0.22147	-0.26093	-0.14938	-0.01033	0.08548	0.15002	0.15617	0.14947	0.05881	-0.07304	-0.12403	-0.11861	-0.08037	-0.02176	0.00375	-0.00575	-0.03368
0.12148	-0.0694	-0.08914	-0.06605	-0.22225	-0.3486	-0.09098	0.16187	0.01036	-0.26002	-0.22422	0.0217	0.05503	0.01283	0.08067	0.06623	0.02338	0.07306	-0.07044	-0.2864	-0.23244	-0.06737	-0.06968	-0.10508	0.07552	0.2444	0.10096	-0.16016	-0.20347	-0.03209	0.02601	-0.09672	-0.17647	-0.22884	-0.26804	-0.15286	-0.00959	0.09091	0.15871	0.16305	0.1531	0.05776	-0.07942	-0.1325	-0.12649	-0.08723	-0.02661	0.00164	-0.00632	-0.0333
0.12173	-0.07094	-0.09188	-0.07018	-0.22921	-0.3557	-0.09609	0.15921	0.01358	-0.24884	-0.21209	0.02696	0.05311	0.00795	0.07748	0.06441	0.02271	0.07178	-0.06977	-0.28244	-0.2296	-0.06814	-0.07309	-0.10821	0.0777	0.24931	0.10068	-0.16385	-0.20417	-0.0277	0.03339	-0.092	-0.17906	-0.23616	-0.27509	-0.15624	-0.00877	0.09631	0.16713	0.16951	0.15633	0.05641	-0.08596	-0.14091	-0.13427	-0.09409	-0.03154	-0.000533064	-0.00688	-0.03287
0.12197	-0.07224	-0.09434	-0.07434	-0.23624	-0.36264	-0.10129	0.1561	0.0164	-0.23766	-0.19968	0.03241	0.05116	0.00282	0.07402	0.06266	0.02247	0.07071	-0.06896	-0.27805	-0.22616	-0.06835	-0.07601	-0.11103	0.0797	0.2538	0.10017	-0.16756	-0.20484	-0.02338	0.04096	-0.08674	-0.18131	-0.24344	-0.28205	-0.1595	-0.00784	0.10167	0.17522	0.17549	0.15914	0.05477	-0.09265	-0.14923	-0.14187	-0.10091	-0.03653	-0.00274	-0.00744	-0.03241
0.12221	-0.07329	-0.09647	-0.0785	-0.24334	-0.36945	-0.1066	0.15251	0.01877	-0.22656	-0.18707	0.03803	0.04919	-0.00252	0.07035	0.06105	0.02269	0.06986	-0.068	-0.27326	-0.22213	-0.06799	-0.07846	-0.11354	0.08153	0.25785	0.09943	-0.17128	-0.20549	-0.01913	0.04869	-0.08097	-0.18318	-0.25065	-0.28893	-0.16261	-0.00679	0.10697	0.18291	0.18095	0.16153	0.05285	-0.09944	-0.15738	-0.14924	-0.10763	-0.04153	-0.00497	-0.00798	-0.0319
0.12245	-0.07404	-0.09822	-0.08264	-0.2505	-0.37615	-0.11205	0.14842	0.02063	-0.21561	-0.17432	0.04378	0.04721	-0.00801	0.06652	0.05961	0.0234	0.06927	-0.06688	-0.26807	-0.21753	-0.06706	-0.08042	-0.11573	0.08315	0.26143	0.09844	-0.17497	-0.20611	-0.01498	0.05652	-0.0747	-0.18468	-0.25777	-0.29571	-0.16556	-0.00559	0.11219	0.19016	0.18585	0.16348	0.05065	-0.1063	-0.16531	-0.1563	-0.1142	-0.04653	-0.0072	-0.00849	-0.03135
0.1227	-0.07448	-0.09954	-0.08672	-0.25773	-0.38274	-0.11764	0.1438	0.02194	-0.20488	-0.16149	0.04962	0.04524	-0.01361	0.0626	0.05842	0.02465	0.06898	-0.06559	-0.26252	-0.21237	-0.06558	-0.08189	-0.11759	0.08457	0.26451	0.09722	-0.17862	-0.2067	-0.01097	0.06442	-0.06796	-0.18577	-0.26477	-0.30236	-0.16833	-0.00422	0.11732	0.19691	0.19016	0.16498	0.04818	-0.11317	-0.17295	-0.163	-0.12057	-0.05149	-0.00943	-0.00898	-0.03075
0.12294	-0.07458	-0.10041	-0.0907	-0.26499	-0.38922	-0.12338	0.13864	0.02267	-0.19441	-0.14865	0.05551	0.04329	-0.01926	0.05865	0.05752	0.02645	0.06901	-0.06412	-0.25662	-0.20668	-0.06355	-0.08289	-0.11914	0.08578	0.26708	0.09577	-0.18219	-0.20725	-0.00711	0.07234	-0.0608	-0.18646	-0.27165	-0.30887	-0.17088	-0.00267	0.12234	0.20311	0.19384	0.16605	0.04548	-0.12003	-0.18024	-0.16926	-0.12667	-0.05636	-0.01163	-0.00943	-0.03009
0.12318	-0.07432	-0.10078	-0.09457	-0.27229	-0.3956	-0.12929	0.13291	0.02276	-0.18428	-0.13587	0.06141	0.04136	-0.0249	0.05474	0.05697	0.02884	0.06938	-0.06247	-0.25039	-0.20049	-0.06099	-0.08342	-0.12038	0.08677	0.26914	0.0941	-0.18565	-0.20773	-0.00342	0.08022	-0.05323	-0.18673	-0.27836	-0.31521	-0.17319	-0.000913616	0.12724	0.20871	0.19689	0.16669	0.04256	-0.12681	-0.18712	-0.17504	-0.13246	-0.06113	-0.0138	-0.00983	-0.02939
0.12342	-0.07368	-0.10062	-0.09829	-0.27959	-0.40188	-0.13536	0.12661	0.02221	-0.17453	-0.1232	0.06727	0.03947	-0.03047	0.05094	0.05681	0.03183	0.07012	-0.06062	-0.24387	-0.19383	-0.05794	-0.0835	-0.12131	0.08756	0.27067	0.09224	-0.18896	-0.20813	8.9943e-05	0.08803	-0.04531	-0.18656	-0.28487	-0.32136	-0.17524	0.00107	0.132	0.21367	0.19926	0.16691	0.03945	-0.13348	-0.19353	-0.18027	-0.1379	-0.06576	-0.01593	-0.01019	-0.02864
0.12367	-0.07265	-0.0999	-0.10183	-0.28688	-0.40804	-0.14159	0.11973	0.02098	-0.16521	-0.11072	0.07306	0.03764	-0.03592	0.04732	0.05711	0.03545	0.07125	-0.05858	-0.23707	-0.18674	-0.05442	-0.08316	-0.12194	0.08814	0.2717	0.09021	-0.19208	-0.20843	0.0034	0.09571	-0.03709	-0.18597	-0.29117	-0.32729	-0.177	0.0033	0.13662	0.21796	0.20097	0.16675	0.03617	-0.14	-0.19941	-0.18491	-0.14293	-0.07022	-0.018	-0.01051	-0.02783
0.12391	-0.07122	-0.09861	-0.10515	-0.29411	-0.41407	-0.14797	0.1123	0.01906	-0.15636	-0.09846	0.07873	0.03587	-0.04117	0.04395	0.0579	0.03969	0.07279	-0.05633	-0.23004	-0.17926	-0.05048	-0.08243	-0.12229	0.08852	0.27221	0.08804	-0.19496	-0.2086	0.00649	0.1032	-0.0286	-0.18495	-0.29721	-0.33296	-0.17845	0.00578	0.14109	0.22155	0.202	0.16622	0.03277	-0.14631	-0.20472	-0.1889	-0.14752	-0.07449	-0.02	-0.01078	-0.02698
0.12415	-0.06939	-0.09673	-0.10824	-0.30126	-0.41995	-0.15449	0.10431	0.01644	-0.14801	-0.0865	0.08424	0.03419	-0.04617	0.04091	0.05923	0.04457	0.07474	-0.05388	-0.2228	-0.17145	-0.04615	-0.08132	-0.12238	0.08869	0.27222	0.08574	-0.19756	-0.20861	0.00937	0.11048	-0.01992	-0.1835	-0.30296	-0.33835	-0.17958	0.00854	0.14541	0.22441	0.20235	0.16535	0.02928	-0.15237	-0.2094	-0.1922	-0.15163	-0.07854	-0.02193	-0.01099	-0.02608
0.12439	-0.06714	-0.09426	-0.11107	-0.30829	-0.42565	-0.16111	0.09578	0.01313	-0.1402	-0.07487	0.08958	0.03261	-0.05085	0.03825	0.06113	0.05009	0.07712	-0.05122	-0.21539	-0.16334	-0.04148	-0.07989	-0.12222	0.08867	0.27175	0.08335	-0.19984	-0.20845	0.01203	0.11747	-0.01109	-0.18162	-0.30838	-0.34341	-0.18035	0.0116	0.14958	0.22654	0.20203	0.16419	0.02573	-0.15814	-0.21342	-0.19479	-0.15523	-0.08235	-0.02378	-0.01116	-0.02515
0.12464	-0.0645	-0.09119	-0.11361	-0.31515	-0.43115	-0.16782	0.08676	0.00912	-0.13295	-0.06361	0.0947	0.03114	-0.05515	0.03606	0.06364	0.05624	0.07994	-0.04836	-0.20784	-0.155	-0.03652	-0.07817	-0.12184	0.08846	0.2708	0.08089	-0.20176	-0.20807	0.01446	0.12415	-0.00219	-0.17933	-0.31344	-0.34812	-0.18075	0.01495	0.1536	0.22792	0.20106	0.16276	0.02216	-0.16359	-0.21675	-0.19664	-0.15832	-0.08591	-0.02554	-0.01129	-0.02418
0.12488	-0.06145	-0.08754	-0.11584	-0.3218	-0.43641	-0.17459	0.07725	0.00444	-0.12628	-0.05277	0.09959	0.02981	-0.05902	0.03438	0.06678	0.06302	0.08319	-0.0453	-0.20018	-0.14646	-0.03132	-0.0762	-0.12125	0.08806	0.26939	0.07839	-0.20327	-0.20745	0.01668	0.13045	0.00673	-0.17665	-0.3181	-0.35244	-0.18076	0.01863	0.15748	0.22857	0.19946	0.1611	0.01862	-0.16868	-0.21935	-0.19774	-0.16087	-0.0892	-0.02721	-0.01136	-0.02318
0.12512	-0.05803	-0.08331	-0.11775	-0.32819	-0.44139	-0.18139	0.06731	-0.000908561	-0.1202	-0.04237	0.10424	0.02863	-0.06239	0.03328	0.07058	0.07041	0.08687	-0.04203	-0.19245	-0.1378	-0.02594	-0.07402	-0.12049	0.08748	0.26754	0.07588	-0.20434	-0.20656	0.01867	0.13634	0.01559	-0.17358	-0.32234	-0.35634	-0.18036	0.02264	0.16123	0.22847	0.19724	0.15926	0.01513	-0.17338	-0.22123	-0.19809	-0.16288	-0.09221	-0.02878	-0.0114	-0.02215
0.12536	-0.05424	-0.07855	-0.11933	-0.33428	-0.44605	-0.18816	0.05697	-0.00689	-0.11471	-0.03243	0.10862	0.02763	-0.06523	0.0328	0.07505	0.07838	0.09098	-0.03858	-0.18468	-0.12906	-0.02042	-0.07168	-0.11959	0.08672	0.26527	0.07338	-0.20492	-0.20537	0.02045	0.14177	0.02432	-0.17017	-0.32611	-0.35978	-0.17954	0.02699	0.16485	0.22766	0.19445	0.15727	0.01173	-0.17766	-0.22237	-0.19769	-0.16436	-0.09494	-0.03026	-0.0114	-0.02111
0.12561	-0.05011	-0.07326	-0.12057	-0.34001	-0.45034	-0.19487	0.04628	-0.01347	-0.10982	-0.02297	0.11274	0.02683	-0.06748	0.03298	0.0802	0.08692	0.0955	-0.03494	-0.17691	-0.1203	-0.01484	-0.06922	-0.11856	0.08579	0.26258	0.07091	-0.20499	-0.20385	0.02203	0.14671	0.03285	-0.16643	-0.32939	-0.36272	-0.17828	0.03169	0.16838	0.22614	0.19111	0.15519	0.00847	-0.18152	-0.22278	-0.19658	-0.16531	-0.09739	-0.03163	-0.01136	-0.02006
0.12585	-0.04566	-0.0675	-0.12145	-0.34532	-0.45422	-0.20147	0.0353	-0.02062	-0.10551	-0.014	0.1166	0.02624	-0.06911	0.03385	0.08601	0.09599	0.10043	-0.03113	-0.16918	-0.11158	-0.00923	-0.06668	-0.11744	0.08468	0.25951	0.0685	-0.20452	-0.20198	0.0234	0.15111	0.0411	-0.16239	-0.33215	-0.36514	-0.17657	0.03675	0.17181	0.22396	0.18727	0.15304	0.00536	-0.18494	-0.22248	-0.19477	-0.16575	-0.09956	-0.03291	-0.01129	-0.019
0.12609	-0.04093	-0.0613	-0.12198	-0.35018	-0.45764	-0.20792	0.02408	-0.02829	-0.10178	-0.00553	0.12021	0.02588	-0.0701	0.03544	0.09249	0.10556	0.10574	-0.02716	-0.16151	-0.10294	-0.00366	-0.06411	-0.11626	0.08341	0.25608	0.06616	-0.20348	-0.19974	0.02459	0.15494	0.049	-0.1581	-0.33437	-0.36701	-0.1744	0.04217	0.17518	0.22114	0.18297	0.15088	0.00244	-0.18792	-0.2215	-0.19231	-0.16572	-0.10145	-0.03409	-0.0112	-0.01795
0.12633	-0.03595	-0.05471	-0.12215	-0.35452	-0.46053	-0.21415	0.01268	-0.03644	-0.09862	0.00245	0.12356	0.02577	-0.07042	0.03774	0.0996	0.11558	0.1114	-0.02304	-0.15393	-0.09445	0.00181	-0.06155	-0.11504	0.08197	0.2523	0.06393	-0.20187	-0.19711	0.0256	0.15816	0.05649	-0.15359	-0.33602	-0.3683	-0.17177	0.04797	0.17849	0.21772	0.17826	0.14873	-0.000280861	-0.19047	-0.21988	-0.18925	-0.16525	-0.10308	-0.03518	-0.01108	-0.0169
0.12658	-0.03075	-0.04779	-0.12197	-0.3583	-0.46286	-0.22013	0.00117	-0.045	-0.09599	0.00994	0.1267	0.02592	-0.07006	0.04076	0.10732	0.12602	0.1174	-0.01879	-0.14647	-0.08614	0.00714	-0.05904	-0.11383	0.08036	0.2482	0.06181	-0.19966	-0.19408	0.02645	0.16076	0.06348	-0.14891	-0.33709	-0.36898	-0.16868	0.05412	0.18176	0.21374	0.17319	0.14664	-0.00279	-0.19259	-0.21766	-0.18564	-0.16437	-0.10446	-0.03617	-0.01094	-0.01586
0.12682	-0.02538	-0.04059	-0.12144	-0.36147	-0.46456	-0.22579	-0.01039	-0.05393	-0.09388	0.01696	0.12963	0.02636	-0.06904	0.04448	0.11562	0.13681	0.1237	-0.01441	-0.13916	-0.07808	0.01227	-0.05663	-0.11264	0.07859	0.24381	0.05982	-0.19686	-0.19064	0.02713	0.16272	0.06991	-0.14409	-0.33758	-0.36906	-0.16512	0.06064	0.185	0.20925	0.1678	0.14461	-0.00507	-0.19431	-0.21489	-0.18155	-0.16313	-0.1056	-0.03707	-0.01079	-0.01483
0.12706	-0.01987	-0.03316	-0.12057	-0.36398	-0.46559	-0.23109	-0.02194	-0.06316	-0.09225	0.02351	0.13238	0.02708	-0.06734	0.04888	0.12443	0.14791	0.13027	-0.00993	-0.13202	-0.07029	0.01714	-0.05436	-0.11151	0.07665	0.23916	0.05798	-0.19347	-0.1868	0.02767	0.16399	0.07572	-0.13919	-0.33747	-0.36849	-0.16111	0.0675	0.18824	0.2043	0.16215	0.1427	-0.00711	-0.19564	-0.21163	-0.17704	-0.16159	-0.10653	-0.03789	-0.01063	-0.01383
0.1273	-0.01425	-0.02556	-0.11937	-0.3658	-0.46591	-0.23597	-0.03341	-0.07262	-0.09107	0.02963	0.13498	0.02812	-0.06499	0.05392	0.13372	0.15927	0.13708	-0.00537	-0.12507	-0.06283	0.02172	-0.05226	-0.11047	0.07455	0.23426	0.0563	-0.18951	-0.18255	0.02807	0.16459	0.08084	-0.13426	-0.33676	-0.3673	-0.15666	0.0747	0.19148	0.19893	0.15629	0.14089	-0.00893	-0.19662	-0.20794	-0.17218	-0.15978	-0.10726	-0.03863	-0.01046	-0.01285
0.12755	-0.00857	-0.01785	-0.11784	-0.36689	-0.46546	-0.24039	-0.04473	-0.08225	-0.09031	0.03534	0.13748	0.02947	-0.06202	0.05954	0.14342	0.17081	0.14409	-0.000740004	-0.11834	-0.05572	0.02597	-0.05037	-0.10956	0.07228	0.22915	0.05478	-0.18498	-0.17791	0.02834	0.16449	0.08522	-0.12935	-0.33547	-0.36546	-0.15178	0.08222	0.19472	0.19319	0.15024	0.13922	-0.01053	-0.19727	-0.20389	-0.16705	-0.15778	-0.10783	-0.03931	-0.0103	-0.01189
0.12779	-0.00287	-0.01009	-0.116	-0.36721	-0.46421	-0.2443	-0.05584	-0.09198	-0.08991	0.04068	0.13991	0.03114	-0.05846	0.0657	0.15346	0.18249	0.15126	0.00394	-0.11184	-0.04901	0.02983	-0.04874	-0.10879	0.06985	0.22385	0.05343	-0.17991	-0.17289	0.02848	0.16369	0.08881	-0.12451	-0.33359	-0.36299	-0.14648	0.09003	0.19799	0.18712	0.14407	0.13769	-0.01192	-0.19762	-0.19953	-0.16172	-0.15565	-0.10825	-0.03992	-0.01014	-0.01096
0.12803	0.00282	-0.00231	-0.11386	-0.36674	-0.46213	-0.24767	-0.06669	-0.10175	-0.08985	0.04566	0.14231	0.03315	-0.05435	0.07232	0.16376	0.19424	0.15855	0.00864	-0.10559	-0.04272	0.03329	-0.04737	-0.10819	0.06726	0.2184	0.05226	-0.17433	-0.16751	0.02851	0.16218	0.09156	-0.11979	-0.33116	-0.3599	-0.14081	0.0981	0.20126	0.18078	0.13781	0.13629	-0.01311	-0.19771	-0.19493	-0.15628	-0.15343	-0.10856	-0.04048	-0.00999	-0.01006
0.12827	0.00847	0.00543	-0.11143	-0.36546	-0.45919	-0.25046	-0.07721	-0.11148	-0.09007	0.05034	0.14473	0.03549	-0.04975	0.07932	0.17425	0.206	0.16592	0.01334	-0.0996	-0.03688	0.03631	-0.04631	-0.10779	0.0645	0.21282	0.05127	-0.16827	-0.16179	0.02844	0.15998	0.09343	-0.11525	-0.32819	-0.35619	-0.13477	0.10641	0.20454	0.1742	0.1315	0.13503	-0.01412	-0.19758	-0.19017	-0.15079	-0.1512	-0.1088	-0.041	-0.00985	-0.00919
0.12852	0.01403	0.01308	-0.10872	-0.36336	-0.45537	-0.25264	-0.08737	-0.12112	-0.09054	0.05474	0.1472	0.03817	-0.0447	0.08661	0.18484	0.21769	0.17332	0.01802	-0.09389	-0.03149	0.03887	-0.04556	-0.10761	0.06159	0.20713	0.05047	-0.16177	-0.15576	0.02826	0.15708	0.0944	-0.11095	-0.32471	-0.35189	-0.1284	0.11492	0.20783	0.16743	0.12518	0.1339	-0.01497	-0.19726	-0.1853	-0.14534	-0.14902	-0.10898	-0.04149	-0.00973	-0.00834
0.12876	0.0195	0.02061	-0.10575	-0.36045	-0.45067	-0.25419	-0.0971	-0.1306	-0.0912	0.0589	0.14976	0.04119	-0.03927	0.0941	0.19544	0.22927	0.18071	0.02266	-0.08847	-0.02659	0.04096	-0.04514	-0.10765	0.05852	0.20138	0.04984	-0.15487	-0.14944	0.028	0.15352	0.09442	-0.10693	-0.32076	-0.34702	-0.12174	0.12358	0.2111	0.1605	0.11887	0.13288	-0.01569	-0.19678	-0.1804	-0.14	-0.14695	-0.10914	-0.04197	-0.00963	-0.00751
0.129	0.02483	0.02798	-0.10254	-0.35672	-0.4451	-0.2551	-0.10638	-0.13987	-0.09203	0.06286	0.15246	0.04454	-0.03353	0.10169	0.20595	0.24065	0.18804	0.02722	-0.08334	-0.02217	0.04256	-0.04506	-0.10793	0.05531	0.19557	0.04938	-0.14761	-0.14287	0.02765	0.1493	0.0935	-0.10325	-0.31638	-0.34162	-0.1148	0.13237	0.21434	0.15345	0.11261	0.13196	-0.01631	-0.1962	-0.17553	-0.13484	-0.14504	-0.10932	-0.04244	-0.00956	-0.00671
0.12924	0.03001	0.03516	-0.09909	-0.35219	-0.43865	-0.25535	-0.11516	-0.14886	-0.09298	0.06665	0.15533	0.04822	-0.02754	0.10927	0.21628	0.25177	0.19527	0.03169	-0.07853	-0.01825	0.04367	-0.04532	-0.10845	0.05197	0.18975	0.0491	-0.14004	-0.13608	0.02723	0.14446	0.09162	-0.09994	-0.3116	-0.33571	-0.10764	0.14123	0.21754	0.14631	0.10643	0.13113	-0.01685	-0.19553	-0.17074	-0.12992	-0.14334	-0.10954	-0.04292	-0.00952	-0.00593
0.12949	0.03503	0.04213	-0.09542	-0.34689	-0.43135	-0.25495	-0.12342	-0.15752	-0.094	0.0703	0.1584	0.05221	-0.02138	0.11674	0.22633	0.26256	0.20234	0.03603	-0.07403	-0.01483	0.04429	-0.04591	-0.1092	0.04849	0.18394	0.04898	-0.13221	-0.1291	0.02674	0.13902	0.08879	-0.09707	-0.30647	-0.32932	-0.10029	0.15011	0.22065	0.13911	0.10033	0.13035	-0.01734	-0.19481	-0.16609	-0.12531	-0.14191	-0.10983	-0.04342	-0.00952	-0.00517
0.12973	0.03986	0.04888	-0.09155	-0.34086	-0.42323	-0.25389	-0.13111	-0.16581	-0.09507	0.07383	0.16169	0.05652	-0.01511	0.12398	0.236	0.27296	0.2092	0.04022	-0.06984	-0.0119	0.04444	-0.04683	-0.11018	0.04491	0.17816	0.04902	-0.12417	-0.12198	0.02619	0.13302	0.08501	-0.09465	-0.30104	-0.32251	-0.09277	0.15897	0.22365	0.13185	0.09435	0.12961	-0.0178	-0.19406	-0.16161	-0.12104	-0.14076	-0.1102	-0.04396	-0.00957	-0.00443
0.12997	0.0445	0.05539	-0.0875	-0.33412	-0.41433	-0.25219	-0.13823	-0.17367	-0.09614	0.07728	0.16524	0.06112	-0.00882	0.1309	0.2452	0.28289	0.21581	0.04422	-0.06599	-0.00947	0.04411	-0.04805	-0.11139	0.04123	0.17245	0.04921	-0.11598	-0.11476	0.02558	0.12651	0.08031	-0.09274	-0.29535	-0.31529	-0.08514	0.16776	0.2265	0.12457	0.08848	0.12887	-0.01828	-0.19332	-0.15737	-0.11717	-0.13995	-0.11069	-0.04455	-0.00967	-0.00371
0.13021	0.04894	0.06166	-0.08327	-0.32674	-0.4047	-0.24986	-0.14474	-0.18107	-0.09718	0.08067	0.16904	0.066	-0.00256	0.13739	0.25383	0.2923	0.22212	0.04802	-0.06247	-0.00751	0.04334	-0.04955	-0.11279	0.03747	0.16682	0.04954	-0.10769	-0.10748	0.02492	0.11953	0.07472	-0.09134	-0.28946	-0.30772	-0.07741	0.17643	0.22917	0.11726	0.08273	0.1281	-0.01878	-0.19259	-0.15337	-0.11373	-0.13949	-0.1113	-0.04519	-0.00984	-0.00301
0.13046	0.05319	0.06769	-0.07888	-0.31877	-0.39439	-0.24691	-0.15065	-0.18797	-0.09816	0.08401	0.17312	0.07113	0.00359	0.14335	0.2618	0.30113	0.22809	0.05159	-0.05928	-0.00602	0.04214	-0.05132	-0.11438	0.03366	0.16132	0.05	-0.09935	-0.10018	0.02421	0.11212	0.06827	-0.0905	-0.28341	-0.29983	-0.06963	0.18493	0.23162	0.10992	0.07712	0.12728	-0.01934	-0.19189	-0.14965	-0.11074	-0.1394	-0.11205	-0.04591	-0.01008	-0.00233
0.1307	0.05724	0.07349	-0.07436	-0.31026	-0.38346	-0.24337	-0.15592	-0.19433	-0.09906	0.08732	0.17747	0.07649	0.00958	0.14867	0.26903	0.30931	0.23368	0.05489	-0.05643	-0.00499	0.04054	-0.05333	-0.11614	0.02981	0.15595	0.05058	-0.09102	-0.09291	0.02346	0.10433	0.06101	-0.09022	-0.27725	-0.29166	-0.06181	0.19323	0.2338	0.10257	0.07163	0.12638	-0.01998	-0.19124	-0.14623	-0.10822	-0.13968	-0.11294	-0.04671	-0.0104	-0.00169
0.13094	0.0611	0.07906	-0.0697	-0.30129	-0.37198	-0.23927	-0.16057	-0.20013	-0.09984	0.09062	0.18209	0.08206	0.01532	0.15329	0.27543	0.3168	0.23884	0.05791	-0.05392	-0.00439	0.03857	-0.05553	-0.11803	0.02595	0.15075	0.05128	-0.08275	-0.08572	0.02265	0.09622	0.05299	-0.09051	-0.27103	-0.28325	-0.054	0.20127	0.23568	0.09521	0.06627	0.12538	-0.02071	-0.19063	-0.1431	-0.10618	-0.14034	-0.11399	-0.04761	-0.01083	-0.00107
0.13118	0.06477	0.08442	-0.06494	-0.29192	-0.36002	-0.23465	-0.16458	-0.20535	-0.10049	0.09389	0.18696	0.08781	0.02078	0.1571	0.28093	0.32354	0.24354	0.06063	-0.05176	-0.0042	0.03627	-0.05791	-0.12003	0.0221	0.14575	0.05208	-0.07458	-0.07863	0.0218	0.08784	0.04426	-0.09139	-0.26479	-0.27464	-0.04621	0.20901	0.23722	0.08784	0.06105	0.12424	-0.02155	-0.19005	-0.14029	-0.10462	-0.14139	-0.1152	-0.04861	-0.01136	-0.000492597
0.13143	0.06828	0.08959	-0.06007	-0.28224	-0.34766	-0.22953	-0.16797	-0.20997	-0.10099	0.09715	0.19207	0.0937	0.02589	0.16004	0.28545	0.32949	0.24775	0.06302	-0.04994	-0.00439	0.03367	-0.06041	-0.12212	0.01829	0.14095	0.05297	-0.06657	-0.0717	0.0209	0.07924	0.0349	-0.09286	-0.25858	-0.26586	-0.03848	0.21643	0.23838	0.08046	0.05597	0.12296	-0.02251	-0.18951	-0.13777	-0.10354	-0.1428	-0.11657	-0.04972	-0.01201	4.13544e-05
0.13167	0.07164	0.09461	-0.05512	-0.27231	-0.33498	-0.22395	-0.17074	-0.21398	-0.10134	0.1004	0.19738	0.09971	0.03061	0.16204	0.28896	0.33461	0.25145	0.06507	-0.04847	-0.00496	0.03082	-0.06301	-0.12426	0.01453	0.13639	0.05395	-0.05875	-0.06496	0.01996	0.07047	0.02495	-0.0949	-0.25243	-0.25696	-0.03082	0.22347	0.23914	0.07309	0.05103	0.12152	-0.02359	-0.18899	-0.13555	-0.10291	-0.14457	-0.1181	-0.05097	-0.01279	0.000523699
0.13191	0.07485	0.09948	-0.05009	-0.26221	-0.32206	-0.21797	-0.17291	-0.2174	-0.10152	0.10361	0.20288	0.10579	0.0349	0.16305	0.29138	0.33889	0.25463	0.06677	-0.04734	-0.00585	0.02776	-0.06567	-0.12642	0.01086	0.13207	0.055	-0.05116	-0.05844	0.01897	0.06159	0.01451	-0.09752	-0.24639	-0.24796	-0.02326	0.23011	0.23947	0.06572	0.04625	0.1199	-0.02479	-0.18848	-0.1336	-0.10274	-0.14667	-0.11979	-0.05235	-0.01372	0.000946472
0.13215	0.07795	0.10425	-0.045	-0.25203	-0.30899	-0.21163	-0.17449	-0.22021	-0.10153	0.10679	0.20851	0.11191	0.03871	0.16302	0.29269	0.34229	0.25725	0.0681	-0.04656	-0.00706	0.02453	-0.06834	-0.12858	0.00728	0.12802	0.05611	-0.04385	-0.05218	0.01793	0.05265	0.00362	-0.10071	-0.2405	-0.23891	-0.01583	0.23632	0.23934	0.05838	0.04163	0.11811	-0.02611	-0.18796	-0.13192	-0.10298	-0.14909	-0.12165	-0.05389	-0.01481	0.0013
0.1324	0.08094	0.10894	-0.03986	-0.24184	-0.29585	-0.20498	-0.17551	-0.22243	-0.10138	0.10992	0.21424	0.11803	0.04202	0.16192	0.29285	0.3448	0.25933	0.06906	-0.04611	-0.00854	0.02118	-0.07099	-0.13071	0.00383	0.12422	0.05727	-0.03684	-0.04619	0.01686	0.04371	-0.00763	-0.10443	-0.23478	-0.22984	-0.00852	0.24208	0.23873	0.05108	0.0372	0.11614	-0.02755	-0.18742	-0.13047	-0.10363	-0.1518	-0.12366	-0.05558	-0.01606	0.00158
0.13264	0.08385	0.11358	-0.03468	-0.23171	-0.28273	-0.19806	-0.176	-0.22409	-0.10107	0.11297	0.22002	0.12411	0.0448	0.15972	0.29184	0.34642	0.26086	0.06965	-0.04599	-0.01028	0.01775	-0.07358	-0.13279	0.000493907	0.1207	0.05846	-0.03017	-0.0405	0.01575	0.0348	-0.01917	-0.10868	-0.22926	-0.22078	-0.00137	0.24738	0.23765	0.04383	0.03295	0.114	-0.02909	-0.18683	-0.12925	-0.10463	-0.15476	-0.12581	-0.05743	-0.01749	0.00177
0.13288	0.0867	0.11819	-0.02948	-0.22172	-0.2697	-0.19093	-0.17599	-0.22519	-0.10061	0.11594	0.22582	0.1301	0.04703	0.15642	0.28966	0.34715	0.26184	0.06986	-0.0462	-0.01223	0.01428	-0.07608	-0.1348	-0.0027	0.11743	0.05966	-0.02385	-0.03514	0.0146	0.02599	-0.03092	-0.11342	-0.22396	-0.21176	0.00561	0.25219	0.23608	0.03666	0.02892	0.11169	-0.03072	-0.18617	-0.12822	-0.10598	-0.15795	-0.1281	-0.05945	-0.01911	0.00186
0.13312	0.08951	0.1228	-0.02426	-0.21194	-0.25686	-0.18364	-0.17549	-0.22576	-0.10001	0.11881	0.23157	0.13598	0.0487	0.15201	0.28631	0.34699	0.26229	0.06972	-0.04672	-0.01438	0.01083	-0.07844	-0.13671	-0.00575	0.11443	0.06086	-0.01791	-0.0301	0.01343	0.0173	-0.04282	-0.11862	-0.21891	-0.20281	0.01243	0.25652	0.23402	0.02958	0.02512	0.10924	-0.03243	-0.18543	-0.12738	-0.10762	-0.16133	-0.13051	-0.06165	-0.02094	0.00184
0.13337	0.09228	0.12743	-0.01906	-0.20243	-0.24426	-0.17622	-0.17454	-0.22583	-0.09927	0.12155	0.23724	0.14169	0.04981	0.14652	0.2818	0.34595	0.26221	0.06921	-0.04754	-0.01668	0.00742	-0.08064	-0.1385	-0.00865	0.11167	0.06205	-0.01236	-0.02542	0.01222	0.00878	-0.0548	-0.12424	-0.2141	-0.19393	0.01907	0.26038	0.2315	0.02263	0.02158	0.10666	-0.03418	-0.18459	-0.12669	-0.10953	-0.16486	-0.13303	-0.06403	-0.02298	0.0017
0.13361	0.09504	0.1321	-0.01387	-0.19325	-0.23199	-0.16874	-0.17318	-0.22542	-0.09841	0.12415	0.24277	0.14721	0.05035	0.13996	0.27616	0.34406	0.26162	0.06837	-0.04866	-0.01913	0.00409	-0.08264	-0.14016	-0.01141	0.10915	0.06321	-0.00722	-0.02109	0.01097	0.000462363	-0.06678	-0.13024	-0.20954	-0.18515	0.02553	0.26376	0.22851	0.01583	0.01831	0.10397	-0.03597	-0.18363	-0.12614	-0.11167	-0.1685	-0.13564	-0.06658	-0.02524	0.00142
0.13385	0.09779	0.13681	-0.00872	-0.18446	-0.2201	-0.16124	-0.17143	-0.22456	-0.09745	0.1266	0.2481	0.15249	0.05034	0.13238	0.26942	0.34135	0.26053	0.06719	-0.05005	-0.02168	0.000897007	-0.08441	-0.14168	-0.01401	0.10684	0.06432	-0.00249	-0.01711	0.0097	-0.00763	-0.07871	-0.13658	-0.20524	-0.17647	0.03181	0.26668	0.2251	0.00922	0.01535	0.10122	-0.03775	-0.18253	-0.12571	-0.11401	-0.17221	-0.13833	-0.06933	-0.02773	0.000979994
0.13409	0.10054	0.14158	-0.00363	-0.1761	-0.20865	-0.15375	-0.16932	-0.22328	-0.09639	0.12887	0.25321	0.1575	0.04979	0.12384	0.26164	0.33783	0.25898	0.06569	-0.05171	-0.02432	-0.00214	-0.08592	-0.14303	-0.01648	0.10473	0.06536	0.00182	-0.0135	0.00839	-0.01547	-0.09053	-0.14322	-0.20118	-0.16791	0.03793	0.26916	0.22129	0.00283	0.01274	0.09843	-0.03952	-0.18127	-0.12537	-0.11649	-0.17596	-0.14108	-0.07225	-0.03048	0.000373297
0.13434	0.10331	0.1464	0.00138	-0.16822	-0.19769	-0.14633	-0.16688	-0.22161	-0.09524	0.13095	0.25802	0.1622	0.04872	0.11438	0.25287	0.33355	0.25699	0.0639	-0.05361	-0.02701	-0.00499	-0.08715	-0.14421	-0.0188	0.10279	0.06632	0.00571	-0.01024	0.00704	-0.02305	-0.10218	-0.15011	-0.19737	-0.15947	0.04389	0.27123	0.21711	-0.00329	0.01049	0.09564	-0.04122	-0.17985	-0.12511	-0.1191	-0.17971	-0.14388	-0.07537	-0.03347	-0.000419278
0.13458	0.10609	0.15129	0.0063	-0.16084	-0.18727	-0.139	-0.16415	-0.21957	-0.09403	0.1328	0.2625	0.16656	0.04716	0.1041	0.24317	0.32855	0.25457	0.06184	-0.05573	-0.02973	-0.00762	-0.08807	-0.14519	-0.02099	0.101	0.06718	0.00918	-0.00734	0.00565	-0.03034	-0.11361	-0.15719	-0.19378	-0.15116	0.04968	0.2729	0.21262	-0.00912	0.00866	0.0929	-0.04285	-0.17826	-0.12491	-0.12179	-0.18342	-0.14672	-0.07866	-0.03673	-0.00141
0.13482	0.10889	0.15623	0.01111	-0.154	-0.17743	-0.13181	-0.16115	-0.2172	-0.09276	0.13443	0.26659	0.17056	0.04514	0.09306	0.23261	0.32287	0.25177	0.05954	-0.05806	-0.03246	-0.01	-0.08865	-0.14598	-0.02307	0.09932	0.06792	0.01223	-0.00479	0.00422	-0.03735	-0.12478	-0.16443	-0.1904	-0.14298	0.05533	0.27422	0.20784	-0.0146	0.00726	0.09023	-0.04437	-0.17647	-0.12475	-0.12452	-0.18706	-0.14957	-0.08214	-0.04026	-0.00262
0.13506	0.1117	0.16122	0.0158	-0.14771	-0.16819	-0.1248	-0.15791	-0.21453	-0.09146	0.1358	0.27025	0.17415	0.04269	0.08136	0.22129	0.31657	0.24861	0.05701	-0.06056	-0.03517	-0.01211	-0.08888	-0.14656	-0.02503	0.09774	0.06852	0.01488	-0.00257	0.00274	-0.04407	-0.13564	-0.17177	-0.18722	-0.13494	0.06082	0.2752	0.20284	-0.01969	0.00633	0.08769	-0.04575	-0.1745	-0.12462	-0.12726	-0.1906	-0.15242	-0.08579	-0.04405	-0.00405
0.13531	0.11452	0.16624	0.02035	-0.14198	-0.15958	-0.11799	-0.15446	-0.21157	-0.09012	0.13691	0.27345	0.17732	0.03985	0.06908	0.20929	0.30968	0.24513	0.05431	-0.0632	-0.03784	-0.01392	-0.08874	-0.14693	-0.02691	0.09621	0.06898	0.01714	-0.00068421	0.00121	-0.05049	-0.14615	-0.17915	-0.18423	-0.12705	0.06616	0.27588	0.19767	-0.02437	0.00591	0.0853	-0.04698	-0.17233	-0.1245	-0.12999	-0.19401	-0.15526	-0.08961	-0.04811	-0.0057
0.13555	0.11735	0.17128	0.02476	-0.13681	-0.15162	-0.11142	-0.15082	-0.20836	-0.08877	0.13774	0.27614	0.18005	0.03666	0.05634	0.1967	0.30228	0.24135	0.05145	-0.06595	-0.04045	-0.01543	-0.08822	-0.14708	-0.02871	0.0947	0.06926	0.01901	0.000887899	-0.000377018	-0.05662	-0.15627	-0.18652	-0.1814	-0.11933	0.07135	0.27629	0.19237	-0.02858	0.00601	0.08311	-0.04803	-0.16997	-0.1244	-0.13266	-0.19725	-0.15807	-0.09358	-0.05242	-0.0076
0.13579	0.12018	0.17632	0.029	-0.1322	-0.14431	-0.10512	-0.14703	-0.20491	-0.0874	0.13827	0.2783	0.18232	0.03317	0.04323	0.18362	0.29441	0.23731	0.04847	-0.06878	-0.04297	-0.01662	-0.0873	-0.14702	-0.03046	0.09319	0.06936	0.0205	0.00216	-0.00203	-0.06246	-0.16597	-0.19382	-0.17872	-0.11179	0.07638	0.27646	0.18701	-0.0323	0.00665	0.08115	-0.04888	-0.16742	-0.12429	-0.13526	-0.20031	-0.16084	-0.09768	-0.05698	-0.00973
0.13603	0.12299	0.18134	0.03306	-0.12814	-0.13767	-0.0991	-0.14311	-0.20125	-0.08603	0.13852	0.2799	0.18411	0.02941	0.02987	0.17015	0.28613	0.23305	0.0454	-0.07166	-0.04538	-0.01747	-0.08597	-0.14673	-0.03218	0.09162	0.06927	0.02165	0.00313	-0.00375	-0.06802	-0.17521	-0.20099	-0.17617	-0.10444	0.08124	0.27642	0.18163	-0.03549	0.00785	0.07944	-0.04953	-0.1647	-0.12417	-0.13775	-0.20316	-0.16353	-0.10189	-0.06176	-0.01209
0.13628	0.12577	0.1863	0.03694	-0.12461	-0.13167	-0.09339	-0.13908	-0.19738	-0.08465	0.13846	0.28092	0.18542	0.02544	0.01635	0.15639	0.2775	0.22859	0.04229	-0.07455	-0.04767	-0.01798	-0.08423	-0.14624	-0.0339	0.08998	0.06898	0.02245	0.00383	-0.00556	-0.07333	-0.18396	-0.20798	-0.17372	-0.0973	0.08593	0.27619	0.17628	-0.03814	0.00963	0.07802	-0.04995	-0.1618	-0.12404	-0.14012	-0.20577	-0.16614	-0.10619	-0.06674	-0.01467
0.13652	0.1285	0.19119	0.04064	-0.12158	-0.12632	-0.08801	-0.13495	-0.19332	-0.08326	0.13811	0.28134	0.18624	0.02131	0.0028	0.14245	0.26859	0.22398	0.03916	-0.0774	-0.04981	-0.01815	-0.08207	-0.14552	-0.03563	0.08822	0.06848	0.02293	0.00427	-0.00747	-0.0784	-0.19222	-0.21472	-0.17136	-0.09038	0.09043	0.2758	0.17101	-0.04021	0.01198	0.0769	-0.05014	-0.15876	-0.1239	-0.14234	-0.20814	-0.16865	-0.11054	-0.07188	-0.01746
0.13676	0.13117	0.19598	0.04414	-0.11902	-0.12159	-0.08297	-0.13076	-0.18909	-0.08185	0.13747	0.28117	0.18658	0.01706	-0.01069	0.12843	0.25945	0.21923	0.03606	-0.0802	-0.0518	-0.01796	-0.07948	-0.14459	-0.0374	0.08633	0.06775	0.02311	0.00446	-0.00948	-0.08324	-0.19995	-0.22118	-0.16907	-0.0837	0.09473	0.27526	0.16587	-0.04171	0.0149	0.0761	-0.05009	-0.15559	-0.12374	-0.14438	-0.21024	-0.17103	-0.11492	-0.07716	-0.02045
0.137	0.13377	0.20062	0.04744	-0.11689	-0.11745	-0.07827	-0.1265	-0.18467	-0.08042	0.13655	0.28038	0.18642	0.01274	-0.024	0.11442	0.25015	0.2144	0.03302	-0.08289	-0.0536	-0.01742	-0.07646	-0.14344	-0.03923	0.08428	0.06681	0.02302	0.00442	-0.01161	-0.0879	-0.20716	-0.2273	-0.16682	-0.07727	0.09881	0.27459	0.16087	-0.04261	0.01838	0.07565	-0.04981	-0.1523	-0.12356	-0.14623	-0.21205	-0.17326	-0.11928	-0.08253	-0.02361
0.13725	0.13627	0.20511	0.05053	-0.11516	-0.11387	-0.07392	-0.12221	-0.18009	-0.07895	0.13535	0.27899	0.18579	0.0084	-0.03703	0.10054	0.24074	0.20951	0.03006	-0.08544	-0.05521	-0.01652	-0.07299	-0.14206	-0.04113	0.08204	0.06565	0.02267	0.00416	-0.01387	-0.09239	-0.21384	-0.23302	-0.16459	-0.07111	0.10266	0.2738	0.15607	-0.04293	0.02242	0.07554	-0.04929	-0.14891	-0.12334	-0.14786	-0.21357	-0.17533	-0.1236	-0.08796	-0.02693
0.13749	0.13866	0.20939	0.05343	-0.11378	-0.11082	-0.06992	-0.11788	-0.17534	-0.07744	0.13388	0.277	0.18467	0.00408	-0.04968	0.08687	0.23127	0.20458	0.02724	-0.08782	-0.0566	-0.01526	-0.06907	-0.14044	-0.04311	0.0796	0.06427	0.02209	0.00372	-0.01626	-0.09675	-0.21998	-0.23831	-0.16237	-0.06523	0.10625	0.27288	0.15147	-0.04267	0.02699	0.07579	-0.04854	-0.14544	-0.12309	-0.14925	-0.21478	-0.17721	-0.12782	-0.09339	-0.03037
0.13773	0.14091	0.21345	0.05613	-0.1127	-0.10826	-0.06626	-0.11353	-0.17042	-0.07587	0.13216	0.2744	0.1831	-0.00017413	-0.06187	0.07351	0.22181	0.19964	0.02456	-0.09	-0.05778	-0.01364	-0.06469	-0.13858	-0.04518	0.07695	0.06267	0.0213	0.0031	-0.01881	-0.101	-0.22559	-0.24312	-0.16013	-0.05965	0.10956	0.27185	0.1471	-0.04184	0.03206	0.07639	-0.04755	-0.14191	-0.12278	-0.15039	-0.21566	-0.17888	-0.13191	-0.09877	-0.03391
0.13797	0.14301	0.21726	0.05862	-0.11187	-0.10613	-0.06293	-0.10916	-0.16533	-0.07422	0.1302	0.27122	0.18107	-0.00433	-0.07349	0.06054	0.2124	0.19473	0.02207	-0.09193	-0.05871	-0.01167	-0.05985	-0.13646	-0.04735	0.07407	0.06087	0.02033	0.00232	-0.0215	-0.10519	-0.23067	-0.24741	-0.15786	-0.05437	0.11258	0.27069	0.14296	-0.04048	0.0376	0.07734	-0.04635	-0.13832	-0.12242	-0.15125	-0.21622	-0.18032	-0.13583	-0.10407	-0.03752
0.13822	0.14494	0.22078	0.06092	-0.11125	-0.1044	-0.05994	-0.10479	-0.16007	-0.07249	0.128	0.26745	0.17859	-0.00836	-0.08449	0.04804	0.20308	0.18985	0.01978	-0.09359	-0.0594	-0.00934	-0.05453	-0.13408	-0.04963	0.07095	0.05886	0.0192	0.00142	-0.02436	-0.10932	-0.23523	-0.25115	-0.15555	-0.04941	0.11528	0.26941	0.13907	-0.0386	0.04356	0.07862	-0.04493	-0.13469	-0.12198	-0.15182	-0.21646	-0.18151	-0.13953	-0.10921	-0.04117
0.13846	0.14668	0.224	0.06303	-0.11078	-0.10301	-0.05725	-0.10042	-0.15465	-0.07068	0.12558	0.26312	0.17569	-0.01222	-0.09478	0.03609	0.19391	0.18501	0.01771	-0.09496	-0.05982	-0.00666	-0.04873	-0.13142	-0.05203	0.06759	0.05667	0.01794	0.000397659	-0.02738	-0.11343	-0.23928	-0.25431	-0.15317	-0.0448	0.11764	0.26797	0.13541	-0.03625	0.04991	0.08022	-0.04331	-0.13103	-0.12145	-0.1521	-0.21636	-0.18244	-0.14296	-0.11415	-0.04481
0.1387	0.14822	0.22688	0.06495	-0.11042	-0.10192	-0.05487	-0.09606	-0.14906	-0.06876	0.12295	0.25825	0.17237	-0.0159	-0.10431	0.02475	0.18491	0.18025	0.01587	-0.09601	-0.05999	-0.00363	-0.04246	-0.12849	-0.05455	0.06399	0.0543	0.01656	-0.000715155	-0.03056	-0.11754	-0.24282	-0.25685	-0.15072	-0.04053	0.11964	0.26638	0.13198	-0.03348	0.05657	0.08212	-0.04149	-0.12735	-0.12081	-0.15206	-0.21593	-0.18308	-0.14608	-0.11884	-0.04842
0.13894	0.14954	0.2294	0.0667	-0.11011	-0.10108	-0.05276	-0.0917	-0.14331	-0.06674	0.12013	0.25284	0.16866	-0.01936	-0.11301	0.01408	0.17612	0.17555	0.01427	-0.09672	-0.05988	-0.000260817	-0.0357	-0.12528	-0.0572	0.06015	0.05176	0.0151	-0.0019	-0.0339	-0.12168	-0.24586	-0.25875	-0.14819	-0.03662	0.12125	0.2646	0.12877	-0.03031	0.06351	0.08428	-0.0395	-0.12365	-0.12006	-0.15172	-0.21518	-0.18342	-0.14886	-0.12322	-0.05196
0.13919	0.15063	0.23154	0.06828	-0.10981	-0.10044	-0.05092	-0.08736	-0.13741	-0.06461	0.1171	0.24692	0.16457	-0.0226	-0.12085	0.00412	0.16758	0.17093	0.01291	-0.0971	-0.0595	0.00344	-0.02847	-0.12179	-0.05999	0.05606	0.04908	0.01357	-0.00315	-0.0374	-0.12585	-0.24842	-0.25999	-0.14557	-0.03308	0.12245	0.26263	0.12575	-0.02682	0.07065	0.08668	-0.03734	-0.11993	-0.11918	-0.15106	-0.21411	-0.18346	-0.15125	-0.12724	-0.05538
0.13943	0.15147	0.23329	0.0697	-0.10946	-0.09996	-0.04932	-0.08304	-0.13136	-0.06238	0.1139	0.24052	0.16012	-0.02559	-0.12779	-0.00507	0.1593	0.16639	0.0118	-0.09712	-0.05885	0.00747	-0.02076	-0.11802	-0.06292	0.05173	0.04626	0.01199	-0.00443	-0.04105	-0.13008	-0.25051	-0.26055	-0.14285	-0.02993	0.12324	0.26043	0.1229	-0.02305	0.07794	0.0893	-0.03504	-0.11621	-0.11815	-0.1501	-0.21275	-0.18317	-0.15322	-0.13085	-0.05866
0.13967	0.15205	0.23464	0.07097	-0.10905	-0.09959	-0.04794	-0.07873	-0.12518	-0.06004	0.11053	0.23366	0.15534	-0.02833	-0.1338	-0.01347	0.15131	0.16193	0.01093	-0.09679	-0.05793	0.01182	-0.01259	-0.11397	-0.06601	0.04717	0.04333	0.01038	-0.00573	-0.04484	-0.13437	-0.25214	-0.26041	-0.14003	-0.02715	0.12358	0.25798	0.1202	-0.01905	0.0853	0.09208	-0.03261	-0.11248	-0.11698	-0.14884	-0.2111	-0.18255	-0.15473	-0.13401	-0.06175
0.13991	0.15236	0.23556	0.0721	-0.10851	-0.09928	-0.04676	-0.07445	-0.11889	-0.05762	0.10699	0.22636	0.15024	-0.03081	-0.13887	-0.02105	0.14362	0.15754	0.01029	-0.09612	-0.05674	0.01647	-0.00396	-0.10965	-0.06925	0.04237	0.04028	0.00876	-0.00703	-0.04877	-0.13874	-0.25331	-0.25958	-0.1371	-0.02476	0.12348	0.25526	0.1176	-0.01491	0.09267	0.09499	-0.03007	-0.10875	-0.11565	-0.14729	-0.20918	-0.1816	-0.15577	-0.13668	-0.06463
0.14016	0.1524	0.23604	0.0731	-0.10783	-0.09901	-0.04575	-0.0702	-0.11249	-0.0551	0.1033	0.21866	0.14485	-0.03302	-0.14298	-0.0278	0.13626	0.15323	0.00986	-0.09509	-0.0553	0.02142	0.00513	-0.10505	-0.07265	0.03734	0.03716	0.00715	-0.00832	-0.05281	-0.14318	-0.25405	-0.25804	-0.13405	-0.02276	0.12292	0.25224	0.11508	-0.01066	0.09998	0.098	-0.02744	-0.10503	-0.11415	-0.14547	-0.20701	-0.18032	-0.15629	-0.13881	-0.06725
0.1404	0.15215	0.23609	0.07398	-0.10697	-0.09872	-0.04488	-0.06597	-0.10602	-0.05251	0.09948	0.21059	0.13919	-0.03498	-0.14616	-0.0337	0.12922	0.14898	0.00963	-0.09374	-0.0536	0.02666	0.01465	-0.10019	-0.07622	0.03211	0.03396	0.00556	-0.00957	-0.05696	-0.1477	-0.25436	-0.25579	-0.13089	-0.02113	0.12189	0.24891	0.11261	-0.00639	0.10717	0.10106	-0.02474	-0.10131	-0.11249	-0.14339	-0.2046	-0.1787	-0.1563	-0.1404	-0.0696
0.14064	0.15161	0.2357	0.07474	-0.1059	-0.0984	-0.04414	-0.06178	-0.0995	-0.04986	0.09552	0.20219	0.13328	-0.03669	-0.14841	-0.03878	0.12251	0.14479	0.00958	-0.09207	-0.05167	0.03217	0.02461	-0.09505	-0.07994	0.02668	0.0307	0.004	-0.01075	-0.06118	-0.15229	-0.25425	-0.25284	-0.12761	-0.01988	0.12042	0.24524	0.11013	-0.00214	0.11417	0.10414	-0.02198	-0.09761	-0.11067	-0.14107	-0.20198	-0.17676	-0.15578	-0.1414	-0.07165
0.14088	0.15077	0.23485	0.0754	-0.10462	-0.098	-0.04348	-0.05763	-0.09295	-0.04717	0.09145	0.19347	0.12713	-0.03818	-0.14977	-0.04303	0.11612	0.14064	0.00969	-0.09009	-0.0495	0.03794	0.03499	-0.08965	-0.08381	0.02106	0.02741	0.00251	-0.01186	-0.06546	-0.15695	-0.25373	-0.2492	-0.12421	-0.01898	0.11848	0.24122	0.10763	0.00201	0.1209	0.10718	-0.0192	-0.09391	-0.10868	-0.13854	-0.19918	-0.1745	-0.15473	-0.14182	-0.07337
0.14113	0.14964	0.23355	0.07595	-0.10309	-0.09749	-0.0429	-0.05352	-0.0864	-0.04445	0.08727	0.18449	0.12077	-0.03947	-0.15027	-0.04649	0.11007	0.13653	0.00994	-0.08783	-0.04711	0.04397	0.04578	-0.08399	-0.08782	0.01527	0.0241	0.00108	-0.01286	-0.06976	-0.16165	-0.25282	-0.24487	-0.12068	-0.01842	0.11612	0.23684	0.10506	0.00601	0.12731	0.11016	-0.01639	-0.09023	-0.10653	-0.13581	-0.1962	-0.17193	-0.15316	-0.14165	-0.07477
0.14137	0.14821	0.2318	0.07641	-0.10131	-0.09685	-0.04236	-0.04947	-0.07989	-0.04173	0.083	0.17528	0.1142	-0.04058	-0.14997	-0.04918	0.10432	0.13245	0.0103	-0.08532	-0.04452	0.05023	0.05697	-0.07805	-0.09196	0.00934	0.02078	-0.000269024	-0.01374	-0.07406	-0.16639	-0.25153	-0.23987	-0.11702	-0.01819	0.11333	0.2321	0.10239	0.00981	0.13335	0.11303	-0.01359	-0.08657	-0.10423	-0.13292	-0.19308	-0.16907	-0.15108	-0.14089	-0.07582
0.14161	0.14648	0.2296	0.07679	-0.09926	-0.09605	-0.04184	-0.04546	-0.07344	-0.03903	0.07865	0.16586	0.10745	-0.04156	-0.14891	-0.05113	0.09889	0.12837	0.01074	-0.08258	-0.04173	0.05671	0.06853	-0.07186	-0.09622	0.00328	0.01748	-0.00152	-0.01447	-0.07832	-0.17114	-0.24985	-0.23423	-0.11324	-0.01824	0.11015	0.22699	0.0996	0.01334	0.13894	0.11576	-0.01081	-0.08293	-0.10178	-0.12989	-0.18982	-0.16593	-0.14851	-0.13956	-0.07653
0.14185	0.14445	0.22697	0.07709	-0.09692	-0.09507	-0.04132	-0.04152	-0.06708	-0.03637	0.07423	0.15629	0.10052	-0.04243	-0.14716	-0.0524	0.09374	0.1243	0.01124	-0.07964	-0.03878	0.06341	0.08045	-0.06541	-0.10058	-0.00289	0.0142	-0.00267	-0.01504	-0.08252	-0.17588	-0.24781	-0.22796	-0.10933	-0.01855	0.10661	0.22153	0.09667	0.01656	0.14404	0.11829	-0.00806	-0.07931	-0.09921	-0.12675	-0.18647	-0.16255	-0.14548	-0.13767	-0.0769
0.1421	0.14214	0.22391	0.07733	-0.09431	-0.09389	-0.04078	-0.03765	-0.06086	-0.03376	0.06976	0.1466	0.09344	-0.04323	-0.1448	-0.05303	0.08887	0.12022	0.01177	-0.07653	-0.03567	0.07029	0.0927	-0.0587	-0.10504	-0.00915	0.01096	-0.00371	-0.01542	-0.08661	-0.18057	-0.2454	-0.22111	-0.10529	-0.01909	0.10275	0.21572	0.09356	0.01943	0.1486	0.12061	-0.00536	-0.07572	-0.09652	-0.12352	-0.18302	-0.15893	-0.14202	-0.13528	-0.07695
0.14234	0.13954	0.22044	0.07752	-0.0914	-0.09251	-0.0402	-0.03386	-0.0548	-0.03125	0.06526	0.13682	0.08622	-0.044	-0.14189	-0.05308	0.08426	0.11612	0.0123	-0.07329	-0.03243	0.07733	0.10526	-0.05175	-0.10956	-0.01548	0.00777	-0.00464	-0.01561	-0.09057	-0.1852	-0.24264	-0.21369	-0.10111	-0.01982	0.0986	0.20959	0.09027	0.02191	0.15257	0.12268	-0.00273	-0.07215	-0.09374	-0.12025	-0.17951	-0.15511	-0.13817	-0.13239	-0.07668
0.14258	0.13666	0.21658	0.07766	-0.08821	-0.09092	-0.03957	-0.03015	-0.04894	-0.02884	0.06074	0.12701	0.07888	-0.04478	-0.13852	-0.0526	0.0799	0.112	0.01281	-0.06995	-0.02908	0.08452	0.11809	-0.04456	-0.11415	-0.02187	0.00464	-0.00545	-0.01559	-0.09435	-0.18971	-0.23952	-0.20575	-0.09682	-0.0207	0.09421	0.20315	0.0868	0.02397	0.15592	0.12447	-0.000166314	-0.06862	-0.0909	-0.11695	-0.17594	-0.15111	-0.13398	-0.12908	-0.07613
0.14282	0.13352	0.21233	0.07776	-0.08474	-0.08911	-0.03889	-0.02654	-0.0433	-0.02655	0.05622	0.11721	0.07143	-0.04561	-0.13476	-0.05166	0.07576	0.10785	0.01328	-0.06655	-0.02564	0.09184	0.13117	-0.03715	-0.11878	-0.02831	0.00155	-0.00614	-0.01536	-0.09793	-0.19409	-0.23606	-0.19732	-0.0924	-0.0217	0.08963	0.19644	0.08313	0.02559	0.15862	0.12595	0.00231	-0.06513	-0.088	-0.11365	-0.17232	-0.14695	-0.1295	-0.12539	-0.07531
0.14306	0.13013	0.20773	0.07784	-0.081	-0.08709	-0.03813	-0.02303	-0.03791	-0.02441	0.05173	0.10746	0.0639	-0.04652	-0.1307	-0.0503	0.07183	0.10366	0.01367	-0.06311	-0.02214	0.09924	0.14445	-0.02953	-0.12345	-0.03478	-0.00147	-0.00673	-0.01489	-0.10127	-0.19829	-0.23225	-0.18845	-0.08787	-0.02278	0.0849	0.18948	0.07927	0.02675	0.16065	0.12711	0.00469	-0.06169	-0.08508	-0.11038	-0.16866	-0.14266	-0.12478	-0.12137	-0.07427
0.14331	0.12649	0.20278	0.07789	-0.07701	-0.08486	-0.03729	-0.01962	-0.03279	-0.02242	0.04729	0.09782	0.05632	-0.04754	-0.12642	-0.0486	0.0681	0.09944	0.01397	-0.05968	-0.0186	0.10672	0.15792	-0.02171	-0.12812	-0.04127	-0.00444	-0.00721	-0.01419	-0.10434	-0.20226	-0.22809	-0.17917	-0.08324	-0.02391	0.08007	0.18232	0.07523	0.02745	0.162	0.12793	0.00697	-0.05829	-0.08215	-0.10716	-0.16498	-0.13827	-0.11989	-0.1171	-0.07302
0.14355	0.12261	0.19751	0.07792	-0.07279	-0.08243	-0.03637	-0.01633	-0.02798	-0.0206	0.04293	0.08833	0.04871	-0.04869	-0.12199	-0.04662	0.06455	0.09518	0.01417	-0.05629	-0.01505	0.11425	0.17152	-0.01369	-0.13279	-0.04776	-0.00736	-0.0076	-0.01325	-0.1071	-0.20597	-0.22359	-0.16952	-0.07851	-0.02505	0.07519	0.17499	0.07102	0.02769	0.16266	0.1284	0.00914	-0.05496	-0.07926	-0.10401	-0.16127	-0.13381	-0.11488	-0.11264	-0.07163
0.14379	0.11851	0.19193	0.07792	-0.06835	-0.07983	-0.03536	-0.01315	-0.02348	-0.01897	0.03867	0.07904	0.04109	-0.05002	-0.11749	-0.04441	0.06115	0.09088	0.01425	-0.05296	-0.0115	0.12179	0.18524	-0.0055	-0.13743	-0.05426	-0.01022	-0.0079	-0.01207	-0.10954	-0.20938	-0.21874	-0.15956	-0.0737	-0.02617	0.07031	0.16754	0.06666	0.02746	0.16263	0.12852	0.01119	-0.0517	-0.07641	-0.10096	-0.15753	-0.1293	-0.10981	-0.10806	-0.07011
0.14403	0.1142	0.18606	0.0779	-0.06372	-0.07704	-0.03426	-0.01008	-0.0193	-0.01751	0.03453	0.07001	0.03351	-0.05152	-0.113	-0.04205	0.05791	0.08655	0.01418	-0.04972	-0.00798	0.12933	0.19904	0.00288	-0.14202	-0.06074	-0.01305	-0.00813	-0.01066	-0.11161	-0.21244	-0.21354	-0.14933	-0.06882	-0.02725	0.06547	0.16001	0.06216	0.02679	0.16192	0.12826	0.01313	-0.04851	-0.07364	-0.098	-0.15376	-0.12476	-0.10475	-0.10342	-0.0685
0.14428	0.10968	0.17991	0.07785	-0.05893	-0.0741	-0.03306	-0.00712	-0.01545	-0.01623	0.03056	0.06129	0.02599	-0.05321	-0.10859	-0.03958	0.05479	0.08219	0.01398	-0.04659	-0.00451	0.13685	0.21289	0.01143	-0.14653	-0.06718	-0.01583	-0.00829	-0.00901	-0.1133	-0.21512	-0.20799	-0.13887	-0.0639	-0.02826	0.06072	0.15244	0.05756	0.02569	0.16054	0.12765	0.01494	-0.04541	-0.07097	-0.09516	-0.14995	-0.12023	-0.09977	-0.09881	-0.06686
0.14452	0.10498	0.1735	0.07777	-0.05399	-0.07102	-0.03176	-0.00427	-0.01193	-0.01513	0.02678	0.05292	0.01859	-0.0551	-0.10431	-0.03707	0.05177	0.07781	0.01363	-0.0436	-0.0011	0.14433	0.22678	0.02015	-0.15093	-0.07358	-0.01858	-0.0084	-0.00713	-0.11458	-0.21737	-0.20209	-0.12824	-0.05894	-0.02917	0.05611	0.14489	0.05288	0.02419	0.1585	0.12666	0.01662	-0.04242	-0.06843	-0.09245	-0.1461	-0.11573	-0.09492	-0.09429	-0.06522
0.14476	0.1001	0.16685	0.07764	-0.04894	-0.06781	-0.03036	-0.00151	-0.00873	-0.0142	0.02322	0.04497	0.01132	-0.05719	-0.10022	-0.03457	0.04886	0.07341	0.01313	-0.04075	0.00224	0.15175	0.24066	0.02906	-0.15519	-0.07992	-0.02129	-0.00846	-0.00504	-0.11545	-0.21918	-0.19586	-0.11748	-0.05398	-0.02996	0.05167	0.13741	0.04816	0.02231	0.15583	0.12532	0.01816	-0.03953	-0.06604	-0.08986	-0.1422	-0.11128	-0.09027	-0.08991	-0.06361
0.145	0.09505	0.15997	0.07747	-0.0438	-0.06448	-0.02886	0.00115	-0.00585	-0.01343	0.0199	0.03748	0.00424	-0.05947	-0.09636	-0.03213	0.04602	0.069	0.01249	-0.03806	0.00549	0.15909	0.25454	0.03814	-0.15929	-0.08618	-0.02397	-0.00849	-0.00274	-0.1159	-0.2205	-0.18928	-0.10666	-0.04903	-0.03062	0.04744	0.13003	0.04343	0.02008	0.15255	0.12361	0.01957	-0.03677	-0.06382	-0.0874	-0.13824	-0.1069	-0.08586	-0.08576	-0.06208
0.14525	0.08985	0.15288	0.07724	-0.0386	-0.06105	-0.02725	0.00374	-0.00327	-0.0128	0.01687	0.03048	-0.00262	-0.06193	-0.09279	-0.02979	0.04325	0.06459	0.0117	-0.03554	0.00864	0.16634	0.26837	0.04739	-0.16319	-0.09234	-0.02662	-0.00849	-0.000249773	-0.1159	-0.2213	-0.18237	-0.0958	-0.04412	-0.03112	0.04348	0.12282	0.03872	0.01754	0.14869	0.12156	0.02083	-0.03415	-0.06178	-0.08506	-0.13421	-0.10261	-0.08175	-0.08188	-0.06064
0.14549	0.08451	0.14559	0.07695	-0.03336	-0.05753	-0.02552	0.00625	-0.000978687	-0.01229	0.01413	0.02402	-0.00922	-0.06455	-0.08952	-0.02759	0.04053	0.06019	0.01079	-0.03319	0.01169	0.17348	0.28213	0.05682	-0.16685	-0.09838	-0.02923	-0.00849	0.00242	-0.11547	-0.22157	-0.17513	-0.08498	-0.03926	-0.03146	0.0398	0.11581	0.03407	0.01473	0.14427	0.11916	0.02195	-0.03168	-0.05994	-0.08285	-0.13009	-0.09842	-0.07798	-0.07832	-0.05935
0.14573	0.07904	0.13812	0.07658	-0.02811	-0.05394	-0.02369	0.0087	0.00105	-0.01188	0.01172	0.01813	-0.01552	-0.06731	-0.08659	-0.02558	0.03786	0.05582	0.00975	-0.03101	0.01463	0.1805	0.29582	0.06643	-0.17026	-0.10428	-0.03182	-0.00848	0.00524	-0.11461	-0.2213	-0.16758	-0.07422	-0.0345	-0.03163	0.03643	0.10905	0.02952	0.01167	0.13933	0.11642	0.02292	-0.02937	-0.05832	-0.08075	-0.12586	-0.09434	-0.07461	-0.07513	-0.05821
0.14597	0.07346	0.13046	0.07611	-0.02288	-0.05027	-0.02175	0.01111	0.00283	-0.01156	0.00966	0.01284	-0.02149	-0.07018	-0.08401	-0.02378	0.03522	0.0515	0.0086	-0.029	0.01745	0.18739	0.30941	0.0762	-0.17338	-0.11002	-0.03437	-0.00848	0.00819	-0.11331	-0.22045	-0.15972	-0.06358	-0.02984	-0.03162	0.0334	0.10257	0.02511	0.00842	0.13391	0.11336	0.02374	-0.02722	-0.05692	-0.07875	-0.12152	-0.09039	-0.07165	-0.07234	-0.05725
0.14622	0.06776	0.12264	0.07554	-0.01769	-0.04653	-0.01968	0.01346	0.00439	-0.01131	0.00795	0.00816	-0.02709	-0.07314	-0.08179	-0.02221	0.0326	0.04723	0.00737	-0.02716	0.02015	0.19413	0.32287	0.08614	-0.17618	-0.11558	-0.03689	-0.0085	0.01126	-0.11161	-0.21904	-0.15157	-0.0531	-0.02531	-0.03142	0.03073	0.09641	0.02086	0.00501	0.12804	0.10998	0.0244	-0.02526	-0.05574	-0.07683	-0.11705	-0.08658	-0.06914	-0.07	-0.05649
0.14646	0.06197	0.11467	0.07484	-0.01256	-0.04274	-0.01749	0.01579	0.00575	-0.01109	0.0066	0.0041	-0.03231	-0.07616	-0.07994	-0.0209	0.03002	0.04303	0.00606	-0.02548	0.02273	0.20072	0.33619	0.09624	-0.17864	-0.12094	-0.03936	-0.00853	0.01442	-0.1095	-0.21705	-0.14314	-0.04281	-0.02093	-0.03105	0.02844	0.0906	0.0168	0.00149	0.12176	0.1063	0.0249	-0.02349	-0.0548	-0.075	-0.11244	-0.08291	-0.0671	-0.06811	-0.05594
0.1467	0.05609	0.10654	0.07401	-0.00751	-0.03889	-0.01518	0.0181	0.00693	-0.0109	0.00562	0.000669779	-0.03711	-0.07919	-0.07845	-0.01986	0.02745	0.03892	0.0047	-0.02395	0.02518	0.20715	0.34936	0.10649	-0.18073	-0.12608	-0.04179	-0.0086	0.01764	-0.10702	-0.2145	-0.13445	-0.03275	-0.01673	-0.03049	0.02652	0.08516	0.01298	-0.00211	0.11511	0.10234	0.02523	-0.02193	-0.05409	-0.07321	-0.10768	-0.07939	-0.06555	-0.0667	-0.05561
0.14694	0.05013	0.09827	0.07303	-0.00256	-0.03498	-0.01274	0.02039	0.00796	-0.01071	0.00501	-0.00214	-0.04147	-0.0822	-0.07731	-0.01909	0.0249	0.03492	0.00331	-0.02256	0.02752	0.21342	0.36236	0.11689	-0.18244	-0.13097	-0.04417	-0.0087	0.02091	-0.10418	-0.21139	-0.12553	-0.02296	-0.0127	-0.02976	0.02499	0.08011	0.0094	-0.00573	0.10815	0.0981	0.02538	-0.02057	-0.05361	-0.07147	-0.10277	-0.07601	-0.06449	-0.06577	-0.05549
0.14719	0.04411	0.08987	0.07188	0.00227	-0.03103	-0.01018	0.02268	0.00885	-0.0105	0.00476	-0.00433	-0.04538	-0.08516	-0.0765	-0.0186	0.02237	0.03104	0.00189	-0.0213	0.02975	0.21951	0.37517	0.12742	-0.18372	-0.13559	-0.04648	-0.00883	0.02419	-0.10102	-0.20774	-0.11639	-0.01345	-0.00888	-0.02885	0.02385	0.07546	0.0061	-0.00934	0.1009	0.0936	0.02537	-0.01943	-0.05334	-0.06975	-0.09769	-0.07279	-0.06391	-0.06531	-0.05557
0.14743	0.03804	0.08135	0.07055	0.00695	-0.02702	-0.00748	0.02496	0.00964	-0.01026	0.00486	-0.00593	-0.04882	-0.08802	-0.076	-0.01839	0.01987	0.0273	0.000486179	-0.02015	0.03186	0.22544	0.38779	0.13807	-0.18457	-0.13992	-0.04872	-0.009	0.02748	-0.09757	-0.20359	-0.10706	-0.00426	-0.00528	-0.02778	0.02309	0.07122	0.0031	-0.01289	0.09343	0.08886	0.02517	-0.01851	-0.05328	-0.06804	-0.09246	-0.06971	-0.06381	-0.06531	-0.05584
0.14767	0.03192	0.07271	0.06903	0.01148	-0.02296	-0.00465	0.02725	0.01034	-0.00996	0.00531	-0.00695	-0.05179	-0.09074	-0.07577	-0.01843	0.0174	0.02371	-0.00089899	-0.0191	0.03387	0.23119	0.4002	0.14884	-0.18497	-0.14393	-0.05088	-0.00919	0.03074	-0.09385	-0.19897	-0.09758	0.00459	-0.0019	-0.02656	0.0227	0.0674	0.000402734	-0.01634	0.08577	0.0839	0.02478	-0.01781	-0.05341	-0.06631	-0.08706	-0.06678	-0.06419	-0.06574	-0.05629
0.14791	0.02577	0.06396	0.0673	0.01584	-0.01885	-0.0017	0.02953	0.01097	-0.00961	0.00609	-0.00742	-0.05427	-0.0933	-0.07579	-0.01871	0.01497	0.02028	-0.00224	-0.01814	0.03578	0.23677	0.41238	0.15972	-0.18488	-0.1476	-0.05294	-0.0094	0.03397	-0.08992	-0.19391	-0.08799	0.01309	0.00124	-0.02518	0.02269	0.06399	-0.00196	-0.01966	0.07798	0.07874	0.02421	-0.01734	-0.05371	-0.06454	-0.08152	-0.06399	-0.065	-0.06659	-0.05688
0.14816	0.0196	0.05512	0.06534	0.02002	-0.01468	0.00138	0.03182	0.01154	-0.00918	0.00717	-0.00737	-0.05628	-0.09564	-0.076	-0.0192	0.01259	0.01702	-0.00353	-0.01725	0.03759	0.24217	0.42434	0.17068	-0.18431	-0.15091	-0.05488	-0.00963	0.03715	-0.08579	-0.18846	-0.07832	0.02121	0.00415	-0.02367	0.02304	0.06101	-0.00399	-0.0228	0.07011	0.0734	0.02346	-0.01708	-0.05416	-0.06273	-0.07582	-0.06135	-0.06624	-0.06781	-0.05758
0.1484	0.01341	0.04618	0.06316	0.02401	-0.01045	0.00459	0.0341	0.01207	-0.00866	0.00855	-0.00683	-0.05781	-0.09774	-0.07636	-0.01987	0.01028	0.01395	-0.00475	-0.01642	0.03932	0.2474	0.43604	0.18173	-0.18323	-0.15383	-0.05669	-0.00984	0.04027	-0.08152	-0.18267	-0.06861	0.02894	0.00681	-0.02203	0.02373	0.05843	-0.00567	-0.02572	0.0622	0.06789	0.02251	-0.01704	-0.05473	-0.06084	-0.07	-0.05885	-0.06787	-0.06936	-0.05837
0.14864	0.00723	0.03716	0.06073	0.02781	-0.00615	0.00791	0.03636	0.01256	-0.00806	0.01018	-0.00585	-0.05887	-0.09956	-0.07684	-0.0207	0.00804	0.01108	-0.00587	-0.01563	0.04097	0.25245	0.44749	0.19283	-0.18163	-0.15635	-0.05835	-0.01002	0.04334	-0.07715	-0.1766	-0.05891	0.03628	0.00924	-0.02025	0.02477	0.05625	-0.00699	-0.0284	0.05431	0.06225	0.02138	-0.01721	-0.05541	-0.05888	-0.06407	-0.05649	-0.06986	-0.0712	-0.05921
0.14888	0.00105	0.02807	0.05805	0.0314	-0.00178	0.01136	0.03861	0.01302	-0.00737	0.01206	-0.00448	-0.05949	-0.10108	-0.07737	-0.02164	0.0059	0.00842	-0.00691	-0.01488	0.04254	0.25732	0.45865	0.20397	-0.1795	-0.15845	-0.05984	-0.01016	0.04633	-0.07269	-0.1703	-0.04926	0.0432	0.01143	-0.01834	0.02613	0.05446	-0.00796	-0.0308	0.04648	0.05648	0.02005	-0.01758	-0.05617	-0.05683	-0.05804	-0.05425	-0.07216	-0.07327	-0.06004
0.14913	-0.0051	0.01891	0.05511	0.03478	0.00267	0.01492	0.04084	0.01346	-0.00658	0.01415	-0.00275	-0.05967	-0.10228	-0.07793	-0.02266	0.00387	0.00596	-0.00783	-0.01415	0.04404	0.26201	0.46952	0.21512	-0.17684	-0.16011	-0.06115	-0.01022	0.04926	-0.0682	-0.16382	-0.0397	0.04972	0.0134	-0.01629	0.02782	0.05306	-0.00858	-0.0329	0.03875	0.05061	0.01853	-0.01815	-0.05699	-0.05467	-0.05194	-0.05215	-0.07474	-0.07553	-0.06084
0.14937	-0.01123	0.00969	0.05191	0.03796	0.0072	0.01859	0.04302	0.01387	-0.00569	0.01642	-0.00071876	-0.05946	-0.10314	-0.07846	-0.02371	0.00197	0.00372	-0.00865	-0.01343	0.04547	0.26651	0.48008	0.22627	-0.17365	-0.16132	-0.06225	-0.01019	0.05213	-0.06371	-0.15724	-0.03029	0.05583	0.01516	-0.01411	0.02982	0.05202	-0.00885	-0.03468	0.03116	0.04466	0.01682	-0.0189	-0.05783	-0.05241	-0.04578	-0.05016	-0.07754	-0.07792	-0.06157
0.14961	-0.01733	0.000424357	0.04845	0.04093	0.01182	0.02235	0.04516	0.01426	-0.00472	0.01883	0.00156	-0.05886	-0.10365	-0.07892	-0.02477	0.000195267	0.0017	-0.00935	-0.01273	0.04684	0.27083	0.4903	0.23738	-0.16994	-0.16207	-0.06313	-0.01004	0.05495	-0.05924	-0.15059	-0.02106	0.06154	0.01674	-0.01178	0.03213	0.05133	-0.00879	-0.03612	0.02377	0.03865	0.01492	-0.01983	-0.05868	-0.05003	-0.03959	-0.04829	-0.08053	-0.08038	-0.06217
0.14985	-0.02337	-0.00887	0.04474	0.04369	0.01651	0.0262	0.04723	0.01463	-0.00367	0.02137	0.00403	-0.05793	-0.10379	-0.07928	-0.0258	-0.00142	-0.000111185	-0.00993	-0.01203	0.04815	0.27495	0.50016	0.24841	-0.16572	-0.16237	-0.06379	-0.00975	0.05772	-0.05483	-0.14395	-0.01206	0.06684	0.01814	-0.00929	0.03474	0.05097	-0.0084	-0.03721	0.01661	0.03259	0.01282	-0.02093	-0.0595	-0.04754	-0.03341	-0.04651	-0.08365	-0.08286	-0.06262
0.1501	-0.02936	-0.01819	0.04077	0.04625	0.02129	0.03011	0.04922	0.01497	-0.00254	0.02398	0.00664	-0.05669	-0.10357	-0.07949	-0.02675	-0.00288	-0.0017	-0.01039	-0.01133	0.0494	0.27888	0.50964	0.25934	-0.16101	-0.16221	-0.06419	-0.00928	0.06047	-0.0505	-0.13737	-0.00333	0.07174	0.0194	-0.00664	0.03764	0.05093	-0.0077	-0.03793	0.00971	0.02652	0.01054	-0.02217	-0.06028	-0.04493	-0.02724	-0.04483	-0.08685	-0.0853	-0.06287
0.15034	-0.03529	-0.02752	0.03655	0.0486	0.02613	0.03407	0.05111	0.01528	-0.00135	0.02665	0.00934	-0.05517	-0.10299	-0.07953	-0.02759	-0.00417	-0.00308	-0.01074	-0.01063	0.05059	0.2826	0.51871	0.27011	-0.15583	-0.16159	-0.06434	-0.00862	0.06319	-0.04627	-0.13089	0.00508	0.07626	0.02053	-0.00381	0.04082	0.05119	-0.00671	-0.03828	0.00311	0.02044	0.00808	-0.02354	-0.06099	-0.0422	-0.02111	-0.04322	-0.09008	-0.08766	-0.06289
0.15058	-0.04114	-0.03683	0.03211	0.05075	0.03104	0.03806	0.05287	0.01554	-9.60141e-05	0.02934	0.01208	-0.05342	-0.10205	-0.07936	-0.02829	-0.00527	-0.00426	-0.01098	-0.00992	0.05173	0.28612	0.52735	0.2807	-0.15021	-0.16052	-0.06423	-0.00775	0.06591	-0.04216	-0.12458	0.01314	0.08039	0.02155	-0.000789781	0.04429	0.05173	-0.00545	-0.03827	-0.00317	0.01438	0.00545	-0.02502	-0.06159	-0.03935	-0.01506	-0.04167	-0.09329	-0.08987	-0.06266
0.15082	-0.0469	-0.04612	0.02746	0.0527	0.03599	0.04205	0.05449	0.01576	0.0012	0.03202	0.01482	-0.05147	-0.10077	-0.07897	-0.02881	-0.00618	-0.00523	-0.0111	-0.00921	0.05281	0.28943	0.53553	0.29105	-0.14417	-0.15902	-0.06385	-0.00665	0.06864	-0.03818	-0.11847	0.02082	0.08415	0.0225	0.00243	0.04803	0.05253	-0.00394	-0.03788	-0.00908	0.00836	0.00264	-0.02659	-0.06208	-0.03639	-0.0091	-0.04017	-0.09643	-0.0919	-0.06213
0.15107	-0.05256	-0.05535	0.0226	0.05447	0.04098	0.04601	0.05595	0.01592	0.00254	0.03466	0.01751	-0.04938	-0.09916	-0.07832	-0.02913	-0.00688	-0.00601	-0.01113	-0.0085	0.05383	0.29252	0.54323	0.30113	-0.13776	-0.15709	-0.06319	-0.00529	0.07138	-0.03435	-0.11262	0.02806	0.08755	0.02339	0.00586	0.05203	0.05357	-0.00221	-0.03713	-0.01461	0.0024	-0.00031614	-0.02824	-0.06243	-0.03333	-0.00326	-0.03871	-0.09945	-0.0937	-0.0613
0.15131	-0.05812	-0.06451	0.01758	0.05606	0.04599	0.04991	0.05721	0.016	0.0039	0.03726	0.02011	-0.04716	-0.09725	-0.0774	-0.02921	-0.00738	-0.00661	-0.01106	-0.00779	0.0548	0.29538	0.55042	0.31089	-0.13101	-0.15476	-0.06227	-0.00368	0.07416	-0.03068	-0.10705	0.03485	0.09058	0.02423	0.0095	0.0563	0.05482	-0.00027467	-0.03603	-0.01972	-0.00347	-0.00342	-0.02994	-0.06261	-0.03017	0.00243	-0.03727	-0.1023	-0.09523	-0.06014
0.15155	-0.06355	-0.07356	0.01242	0.05748	0.05098	0.05374	0.05827	0.01602	0.00527	0.03977	0.0226	-0.04486	-0.09505	-0.07621	-0.02903	-0.00766	-0.00703	-0.0109	-0.00709	0.05571	0.29801	0.55707	0.32029	-0.12397	-0.15203	-0.06107	-0.0018	0.07699	-0.02717	-0.10179	0.04114	0.09325	0.02505	0.01337	0.06081	0.05626	0.00183	-0.03457	-0.02439	-0.00925	-0.00666	-0.03166	-0.06261	-0.02693	0.00795	-0.03584	-0.10493	-0.09645	-0.05863
0.15179	-0.06884	-0.08249	0.00713	0.05873	0.05596	0.05745	0.0591	0.01594	0.00666	0.0422	0.02493	-0.04253	-0.09261	-0.07475	-0.02858	-0.00772	-0.00729	-0.01066	-0.00638	0.05657	0.30041	0.56318	0.32928	-0.11666	-0.14895	-0.05961	0.000353408	0.07987	-0.02381	-0.09689	0.04691	0.09558	0.02587	0.01746	0.06556	0.05787	0.00407	-0.03277	-0.02859	-0.0149	-0.01002	-0.03338	-0.0624	-0.02361	0.01327	-0.0344	-0.10731	-0.09734	-0.05677
0.15204	-0.07398	-0.09125	0.00176	0.05982	0.06088	0.06101	0.05968	0.01577	0.00804	0.04453	0.0271	-0.04019	-0.08994	-0.073	-0.02785	-0.00757	-0.00739	-0.01035	-0.00569	0.05736	0.30256	0.5687	0.33783	-0.10916	-0.14554	-0.0579	0.00277	0.08281	-0.02062	-0.09233	0.05214	0.09755	0.02668	0.02178	0.07054	0.05964	0.00643	-0.03064	-0.03232	-0.02039	-0.01347	-0.03507	-0.06198	-0.02024	0.01839	-0.03294	-0.10941	-0.09787	-0.05455
0.15228	-0.07896	-0.09983	-0.00366	0.06076	0.06571	0.0644	0.05999	0.01549	0.0094	0.04674	0.02907	-0.03787	-0.08708	-0.071	-0.02682	-0.00719	-0.00735	-0.00999	-0.005	0.0581	0.30447	0.57363	0.34588	-0.1015	-0.14183	-0.05596	0.00546	0.08581	-0.01757	-0.08815	0.05681	0.09917	0.02751	0.02633	0.07573	0.06153	0.00887	-0.0282	-0.03554	-0.02572	-0.01702	-0.03671	-0.06132	-0.01681	0.02329	-0.03143	-0.11117	-0.09802	-0.05198
0.15252	-0.08376	-0.10818	-0.0091	0.06156	0.07044	0.06758	0.06002	0.0151	0.01075	0.04885	0.03085	-0.03561	-0.08407	-0.06873	-0.0255	-0.0066	-0.00717	-0.00957	-0.00433	0.05878	0.30613	0.57794	0.35341	-0.09373	-0.13785	-0.05379	0.00839	0.08887	-0.01467	-0.08434	0.0609	0.10044	0.02835	0.0311	0.08114	0.06353	0.01138	-0.02546	-0.03824	-0.03086	-0.02063	-0.03827	-0.06042	-0.01335	0.02797	-0.02987	-0.11258	-0.09777	-0.04907
0.15276	-0.08836	-0.11628	-0.01452	0.06221	0.07503	0.07053	0.05975	0.01459	0.01208	0.05083	0.03243	-0.03343	-0.08094	-0.06623	-0.02389	-0.0058	-0.00688	-0.00911	-0.00368	0.0594	0.30753	0.58162	0.36036	-0.08593	-0.13365	-0.05143	0.01156	0.09199	-0.0119	-0.08089	0.0644	0.10135	0.0292	0.03608	0.08673	0.06562	0.01391	-0.02244	-0.04042	-0.03579	-0.0243	-0.03973	-0.05926	-0.00987	0.03241	-0.02821	-0.1136	-0.09714	-0.04582
0.15301	-0.09275	-0.12409	-0.01989	0.06273	0.07944	0.07321	0.05918	0.01396	0.01337	0.0527	0.0338	-0.03134	-0.07772	-0.06351	-0.02198	-0.0048	-0.00649	-0.00862	-0.00305	0.05996	0.30868	0.58467	0.36671	-0.07814	-0.12927	-0.0489	0.01493	0.09517	-0.00924	-0.0778	0.06733	0.10192	0.03008	0.04126	0.0925	0.06779	0.01645	-0.01917	-0.04207	-0.0405	-0.02801	-0.04108	-0.05786	-0.00637	0.03663	-0.02645	-0.11421	-0.09611	-0.04226
0.15325	-0.09691	-0.13158	-0.02517	0.06312	0.08365	0.0756	0.05829	0.0132	0.01463	0.05446	0.03497	-0.02937	-0.07445	-0.0606	-0.0198	-0.00361	-0.006	-0.0081	-0.00244	0.06046	0.30958	0.58707	0.37241	-0.07042	-0.12475	-0.04622	0.01849	0.09838	-0.00669	-0.07505	0.06966	0.10213	0.03096	0.04663	0.09843	0.07001	0.01896	-0.01567	-0.04319	-0.04496	-0.03174	-0.0423	-0.0562	-0.00288	0.04064	-0.02454	-0.11437	-0.09469	-0.03841
0.15349	-0.10084	-0.13871	-0.03034	0.06339	0.08763	0.07766	0.05707	0.01232	0.01585	0.0561	0.03596	-0.02753	-0.07115	-0.0575	-0.01735	-0.00223	-0.00542	-0.00756	-0.00185	0.0609	0.31022	0.58882	0.37745	-0.06284	-0.12014	-0.04342	0.02221	0.10162	-0.00423	-0.07262	0.07142	0.10199	0.03183	0.05217	0.10451	0.07227	0.02141	-0.01198	-0.04378	-0.04918	-0.03548	-0.04337	-0.0543	0.000606076	0.04444	-0.02246	-0.11409	-0.09289	-0.03431
0.15373	-0.10451	-0.14547	-0.03534	0.06354	0.09134	0.07939	0.05554	0.01131	0.01703	0.05765	0.03677	-0.02582	-0.06786	-0.05425	-0.01465	-0.000687165	-0.00478	-0.00701	-0.00128	0.06128	0.31061	0.58993	0.38178	-0.05545	-0.11548	-0.04053	0.02604	0.10487	-0.00185	-0.07048	0.0726	0.10149	0.0327	0.05785	0.11073	0.07456	0.02378	-0.00813	-0.04386	-0.05313	-0.03923	-0.04429	-0.05216	0.00406	0.04804	-0.02019	-0.11333	-0.09073	-0.02999
0.15398	-0.10792	-0.1518	-0.04016	0.06357	0.09475	0.08075	0.05368	0.01017	0.01816	0.0591	0.03742	-0.02426	-0.0646	-0.05086	-0.01172	0.00101	-0.00408	-0.00646	-0.000737467	0.0616	0.31076	0.59039	0.38539	-0.04831	-0.11082	-0.03758	0.02996	0.1081	0.000475734	-0.0686	0.07324	0.10064	0.03352	0.06365	0.11706	0.07686	0.02603	-0.00415	-0.04344	-0.05681	-0.04297	-0.04504	-0.04979	0.00747	0.05147	-0.01768	-0.11209	-0.08823	-0.02549
0.15422	-0.11105	-0.1577	-0.04477	0.06349	0.09785	0.08174	0.0515	0.00892	0.01926	0.06047	0.03793	-0.02284	-0.0614	-0.04737	-0.00856	0.00286	-0.00334	-0.0059	-0.000221008	0.06186	0.31066	0.59021	0.38827	-0.04148	-0.1062	-0.03461	0.03392	0.11129	0.00275	-0.06695	0.07334	0.09942	0.03429	0.06952	0.12348	0.07916	0.02815	-7.92487e-05	-0.04253	-0.06021	-0.04668	-0.04562	-0.0472	0.01082	0.05474	-0.01493	-0.11036	-0.08541	-0.02085
0.15446	-0.11389	-0.16313	-0.04913	0.06328	0.10059	0.08234	0.04902	0.00756	0.02031	0.06176	0.03831	-0.02156	-0.05827	-0.04379	-0.00521	0.00483	-0.00256	-0.00536	0.000268419	0.06208	0.31033	0.58942	0.39039	-0.035	-0.10166	-0.03164	0.03788	0.11441	0.005	-0.06549	0.07294	0.09784	0.03498	0.07545	0.12997	0.08144	0.03009	0.00404	-0.04116	-0.06332	-0.05036	-0.04602	-0.0444	0.0141	0.05785	-0.01191	-0.10814	-0.08231	-0.01613
0.1547	-0.11643	-0.16806	-0.05322	0.06297	0.10296	0.08254	0.04624	0.0061	0.02132	0.06297	0.03857	-0.02044	-0.05524	-0.04015	-0.00168	0.0069	-0.00176	-0.00483	0.000729532	0.06223	0.30978	0.58801	0.39174	-0.02893	-0.09724	-0.0287	0.04179	0.11743	0.00723	-0.06418	0.07205	0.0959	0.03556	0.08138	0.13651	0.08368	0.03183	0.00818	-0.03933	-0.06614	-0.054	-0.04624	-0.04142	0.01729	0.06084	-0.0086	-0.10542	-0.07896	-0.01136
0.15495	-0.11866	-0.17248	-0.05702	0.06254	0.10495	0.08233	0.04317	0.00455	0.02229	0.06412	0.03873	-0.01947	-0.05234	-0.03646	0.002	0.00907	-0.000947918	-0.00431	0.00116	0.06234	0.30901	0.58601	0.39233	-0.02331	-0.09298	-0.02582	0.04562	0.12033	0.00946	-0.06298	0.07072	0.09359	0.03599	0.08727	0.14306	0.08587	0.03335	0.01231	-0.03707	-0.06866	-0.05759	-0.04628	-0.03826	0.02039	0.06371	-0.00498	-0.10222	-0.07538	-0.00659
0.15519	-0.12057	-0.17636	-0.06051	0.06199	0.10652	0.08171	0.03985	0.00291	0.02321	0.06521	0.03881	-0.01866	-0.04956	-0.03277	0.00581	0.01132	-0.000129407	-0.00382	0.00156	0.06239	0.30804	0.58344	0.39215	-0.01818	-0.08891	-0.02303	0.04932	0.12308	0.0117	-0.06184	0.06898	0.09093	0.03625	0.09308	0.1496	0.08799	0.03462	0.01638	-0.03441	-0.07087	-0.06111	-0.04614	-0.03494	0.02337	0.06648	-0.00105	-0.09854	-0.0716	-0.00187
0.15543	-0.12214	-0.17968	-0.06367	0.06134	0.10767	0.0807	0.03628	0.0012	0.02409	0.06625	0.03882	-0.01799	-0.04694	-0.02907	0.00971	0.01362	0.000686556	-0.00335	0.00193	0.0624	0.30688	0.58032	0.3912	-0.01358	-0.08506	-0.02035	0.05286	0.12564	0.01397	-0.06072	0.06687	0.08791	0.03632	0.09877	0.15609	0.09003	0.03563	0.02038	-0.03138	-0.07279	-0.06456	-0.04583	-0.03149	0.02623	0.06916	0.00322	-0.0944	-0.06767	0.00275
0.15567	-0.12338	-0.18243	-0.06649	0.06057	0.1084	0.07929	0.03248	-0.000571669	0.02493	0.06723	0.03878	-0.01748	-0.04449	-0.02541	0.01369	0.01597	0.00149	-0.00291	0.00227	0.06237	0.30554	0.57669	0.3895	-0.00953	-0.08147	-0.01781	0.05619	0.128	0.01628	-0.05958	0.06442	0.08453	0.03615	0.10427	0.16251	0.09197	0.03636	0.02426	-0.02799	-0.0744	-0.06793	-0.04534	-0.02791	0.02895	0.07178	0.00783	-0.0898	-0.06362	0.00724
0.15592	-0.12427	-0.18459	-0.06895	0.05969	0.10869	0.0775	0.02849	-0.0024	0.02572	0.06817	0.03869	-0.01711	-0.04221	-0.0218	0.01771	0.01834	0.00229	-0.0025	0.00259	0.06229	0.30403	0.57258	0.38707	-0.00606	-0.07815	-0.01543	0.05928	0.13012	0.01864	-0.05838	0.06168	0.08082	0.03572	0.10956	0.16882	0.09379	0.03679	0.02799	-0.0243	-0.07571	-0.07122	-0.04468	-0.02424	0.03152	0.07434	0.01277	-0.08476	-0.05946	0.01156
0.15616	-0.12481	-0.18617	-0.07105	0.05871	0.10856	0.07534	0.02433	-0.00427	0.02647	0.06906	0.03857	-0.01689	-0.04012	-0.01826	0.02175	0.02073	0.00307	-0.00212	0.00287	0.06218	0.30238	0.568	0.38392	-0.00318	-0.07512	-0.01322	0.0621	0.132	0.02107	-0.05707	0.0587	0.07678	0.035	0.11457	0.17498	0.09549	0.03692	0.03155	-0.02032	-0.07673	-0.0744	-0.04388	-0.02049	0.03394	0.07685	0.01807	-0.0793	-0.05525	0.01565
0.1564	-0.125	-0.18715	-0.07279	0.05763	0.10801	0.07283	0.02002	-0.00617	0.02716	0.06992	0.03843	-0.01682	-0.03823	-0.0148	0.02578	0.0231	0.00382	-0.00176	0.00312	0.06203	0.30059	0.56302	0.38008	-0.000912207	-0.0724	-0.0112	0.06463	0.13361	0.02357	-0.05562	0.05551	0.07243	0.03398	0.11927	0.18098	0.09705	0.03672	0.03491	-0.01612	-0.07747	-0.07749	-0.04293	-0.01669	0.03618	0.07933	0.02371	-0.07344	-0.05101	0.01949
0.15664	-0.12485	-0.18753	-0.07415	0.05644	0.10704	0.07001	0.0156	-0.00809	0.02782	0.07074	0.03828	-0.0169	-0.03654	-0.01145	0.02977	0.02546	0.00456	-0.00143	0.00334	0.06186	0.29868	0.55765	0.37558	0.000751817	-0.06999	-0.00937	0.06685	0.13494	0.02616	-0.05401	0.05216	0.06779	0.03263	0.12362	0.18676	0.09846	0.03621	0.03804	-0.01171	-0.07793	-0.08046	-0.04185	-0.01287	0.03824	0.08178	0.02968	-0.0672	-0.04677	0.02304
0.15689	-0.12434	-0.18732	-0.07515	0.05517	0.10568	0.06689	0.01109	-0.01001	0.02843	0.07153	0.03813	-0.01711	-0.03505	-0.00822	0.0337	0.02777	0.00526	-0.00113	0.00354	0.06165	0.29667	0.55193	0.37046	0.00181	-0.06791	-0.00774	0.06873	0.13598	0.02884	-0.05219	0.0487	0.06287	0.03093	0.12758	0.19231	0.09972	0.03538	0.04091	-0.00715	-0.07812	-0.08332	-0.04066	-0.00905	0.04012	0.08422	0.03599	-0.06062	-0.04257	0.02627
0.15713	-0.1235	-0.18652	-0.07579	0.0538	0.10393	0.0635	0.00654	-0.01193	0.02899	0.0723	0.03798	-0.01745	-0.03377	-0.00512	0.03755	0.03004	0.00594	-0.000859811	0.00372	0.06142	0.29456	0.54592	0.36475	0.00226	-0.06615	-0.00633	0.07027	0.13672	0.03161	-0.05017	0.04515	0.0577	0.02889	0.13111	0.1976	0.10081	0.03422	0.0435	-0.00248	-0.07805	-0.08605	-0.03937	-0.00526	0.04179	0.08664	0.0426	-0.05372	-0.03844	0.02915
0.15737	-0.12231	-0.18516	-0.07609	0.05234	0.10183	0.05988	0.00197	-0.01383	0.02951	0.07305	0.03784	-0.01794	-0.03269	-0.00215	0.04129	0.03224	0.00659	-0.00060909	0.00387	0.06117	0.29238	0.53963	0.35851	0.00214	-0.06471	-0.00512	0.07146	0.13716	0.03448	-0.04791	0.04156	0.0523	0.02648	0.13419	0.2026	0.10173	0.03275	0.04579	0.00225	-0.07775	-0.08864	-0.038	-0.00151	0.04326	0.08904	0.04952	-0.04654	-0.03442	0.03165
0.15761	-0.1208	-0.18324	-0.07604	0.05081	0.09939	0.05607	-0.00259	-0.0157	0.02999	0.07377	0.03771	-0.01855	-0.03181	0.000671399	0.04491	0.03436	0.00721	-0.000380179	0.00401	0.0609	0.29014	0.53313	0.35178	0.00144	-0.06358	-0.00412	0.0723	0.1373	0.03744	-0.04541	0.03796	0.04669	0.0237	0.13679	0.20728	0.10247	0.03097	0.04777	0.00702	-0.07721	-0.0911	-0.03655	0.00218	0.04453	0.09144	0.05671	-0.03911	-0.03054	0.03375
0.15786	-0.11897	-0.18078	-0.07566	0.04919	0.09664	0.05209	-0.00709	-0.01753	0.03042	0.07448	0.03759	-0.0193	-0.03113	0.00334	0.04838	0.03639	0.00779	-0.000171217	0.00412	0.06062	0.28785	0.52644	0.34461	0.000208885	-0.06276	-0.00332	0.0728	0.13715	0.04051	-0.04266	0.03439	0.04091	0.02056	0.13889	0.21162	0.10304	0.02889	0.04943	0.01176	-0.07646	-0.0934	-0.03505	0.00578	0.04559	0.09383	0.06416	-0.03147	-0.02682	0.03542
0.1581	-0.11684	-0.17781	-0.07498	0.04751	0.09361	0.04799	-0.01152	-0.01931	0.03082	0.07516	0.03749	-0.02018	-0.03064	0.00584	0.05169	0.03833	0.00835	1.96629e-05	0.00422	0.06032	0.28553	0.5196	0.33705	-0.00154	-0.06224	-0.00272	0.07295	0.13673	0.04366	-0.03967	0.03087	0.03499	0.01707	0.14047	0.2156	0.10343	0.02654	0.05074	0.01644	-0.07552	-0.09554	-0.03349	0.00928	0.04645	0.09621	0.07185	-0.02367	-0.02331	0.03666
0.15834	-0.11441	-0.17435	-0.07401	0.04576	0.09032	0.04379	-0.01585	-0.02103	0.03117	0.07584	0.03739	-0.0212	-0.03036	0.00819	0.05481	0.04014	0.00887	0.000194074	0.00431	0.06001	0.28317	0.51264	0.32914	-0.00377	-0.062	-0.00231	0.07277	0.13603	0.0469	-0.03644	0.02744	0.02894	0.01322	0.14153	0.21918	0.10363	0.02393	0.05171	0.02103	-0.07439	-0.09751	-0.03189	0.01267	0.04711	0.09859	0.07976	-0.01572	-0.02002	0.03744
0.15858	-0.11172	-0.17043	-0.07276	0.04396	0.08681	0.03954	-0.02004	-0.02268	0.0315	0.07651	0.0373	-0.02236	-0.03026	0.01035	0.05774	0.04183	0.00935	0.000352603	0.00439	0.05969	0.2808	0.5056	0.32094	-0.00645	-0.06204	-0.00208	0.07227	0.13508	0.05023	-0.03297	0.02411	0.02282	0.00903	0.14204	0.22237	0.10365	0.02109	0.05233	0.02547	-0.07309	-0.09929	-0.03027	0.01593	0.04758	0.10098	0.08786	-0.00766	-0.01697	0.03777
0.15883	-0.10877	-0.16609	-0.07126	0.0421	0.08312	0.03527	-0.02407	-0.02425	0.03179	0.07719	0.03721	-0.02366	-0.03035	0.01235	0.06045	0.04339	0.00979	0.000495582	0.00445	0.05937	0.27842	0.49851	0.31249	-0.00955	-0.06233	-0.00202	0.07148	0.1339	0.05363	-0.02927	0.02093	0.01663	0.00453	0.14201	0.22512	0.10349	0.01803	0.0526	0.02973	-0.07165	-0.10088	-0.02862	0.01906	0.04787	0.10337	0.09615	0.000472886	-0.01418	0.03764
0.15907	-0.10558	-0.16136	-0.06954	0.04021	0.07927	0.031	-0.02791	-0.02573	0.03207	0.07787	0.03713	-0.02511	-0.03063	0.01416	0.06294	0.0448	0.01018	0.000623187	0.0045	0.05904	0.27603	0.49138	0.30383	-0.01306	-0.06287	-0.00213	0.0704	0.1325	0.0571	-0.02537	0.0179	0.01043	-0.000287721	0.14144	0.22742	0.10316	0.01479	0.05253	0.03378	-0.07006	-0.10226	-0.02696	0.02205	0.048	0.10578	0.1046	0.00866	-0.01166	0.03707
0.15931	-0.10218	-0.15628	-0.06761	0.0383	0.0753	0.02678	-0.03156	-0.02712	0.03234	0.07859	0.03706	-0.02669	-0.03108	0.0158	0.06518	0.04605	0.01053	0.000734972	0.00454	0.05871	0.27364	0.48426	0.29502	-0.01692	-0.06365	-0.00238	0.06907	0.13091	0.06062	-0.02127	0.01504	0.00423	-0.00538	0.14031	0.22926	0.10264	0.01141	0.05212	0.03758	-0.06837	-0.10342	-0.02529	0.02489	0.04797	0.10821	0.1132	0.01687	-0.00942	0.03606
0.15955	-0.0986	-0.15088	-0.06549	0.03636	0.07124	0.02263	-0.03499	-0.0284	0.03262	0.07935	0.03701	-0.0284	-0.03171	0.01725	0.06717	0.04715	0.01083	0.000830332	0.00458	0.05837	0.27127	0.47716	0.28607	-0.02113	-0.06465	-0.00277	0.06752	0.12916	0.06419	-0.01701	0.01238	-0.00192	-0.01074	0.13865	0.23062	0.10195	0.0079	0.05139	0.0411	-0.06657	-0.10435	-0.02362	0.02758	0.0478	0.11066	0.12193	0.02509	-0.00746	0.03463
0.1598	-0.09485	-0.14522	-0.06321	0.03441	0.06712	0.01858	-0.03818	-0.02957	0.03293	0.08017	0.03697	-0.03025	-0.03249	0.01852	0.0689	0.04806	0.01108	0.000908909	0.0046	0.05802	0.2689	0.4701	0.27704	-0.02566	-0.06587	-0.00329	0.06576	0.12727	0.06779	-0.0126	0.00991	-0.00802	-0.01633	0.13645	0.23148	0.1011	0.00432	0.05035	0.04432	-0.06468	-0.10504	-0.02194	0.03011	0.04751	0.11315	0.13078	0.0333	-0.00577	0.0328
0.16004	-0.09096	-0.13932	-0.0608	0.03247	0.06297	0.01466	-0.04112	-0.03061	0.03327	0.08108	0.03696	-0.03222	-0.03343	0.0196	0.07036	0.04881	0.01128	0.000971319	0.00461	0.05767	0.26655	0.46311	0.26796	-0.03048	-0.06729	-0.00393	0.06382	0.12526	0.07141	-0.00808	0.00764	-0.01402	-0.02213	0.13374	0.23184	0.10007	0.000685682	0.04902	0.04721	-0.06273	-0.10548	-0.02027	0.03247	0.04712	0.11568	0.13974	0.04147	-0.00435	0.03059
0.16028	-0.08696	-0.13323	-0.05827	0.03053	0.05883	0.01088	-0.04381	-0.03152	0.03368	0.08211	0.037	-0.0343	-0.0345	0.0205	0.07154	0.04937	0.01142	0.00102	0.00462	0.05732	0.26421	0.45619	0.25885	-0.03558	-0.0689	-0.00466	0.06175	0.12316	0.07503	-0.00347	0.00557	-0.01991	-0.0281	0.13053	0.23168	0.09888	-0.00296	0.04743	0.04976	-0.06072	-0.10565	-0.01861	0.03467	0.04665	0.11826	0.14879	0.0496	-0.0032	0.02802
0.16052	-0.08288	-0.127	-0.05565	0.02861	0.05473	0.00727	-0.04622	-0.03229	0.03417	0.08328	0.03708	-0.03648	-0.03571	0.02121	0.07243	0.04975	0.01151	0.00105	0.00462	0.05696	0.2619	0.44937	0.24976	-0.04091	-0.07071	-0.00549	0.05956	0.12101	0.07864	0.0012	0.0037	-0.02566	-0.03422	0.12683	0.23099	0.09754	-0.00657	0.04559	0.05195	-0.05866	-0.10556	-0.01696	0.03671	0.04611	0.1209	0.15792	0.05766	-0.00231	0.02514
0.16077	-0.07873	-0.12066	-0.05296	0.02673	0.05068	0.00385	-0.04837	-0.03291	0.03477	0.08462	0.03724	-0.03876	-0.03704	0.02173	0.07303	0.04994	0.01155	0.00107	0.00461	0.05661	0.25961	0.44266	0.2407	-0.04648	-0.07269	-0.00639	0.05728	0.11882	0.08223	0.00588	0.00202	-0.03127	-0.04045	0.12268	0.22978	0.09604	-0.01012	0.04353	0.05378	-0.05658	-0.1052	-0.01532	0.03857	0.04553	0.12361	0.16711	0.06565	-0.00167	0.02195
0.16101	-0.07455	-0.11427	-0.05023	0.02488	0.04671	0.00062033	-0.05024	-0.03338	0.0355	0.08616	0.03748	-0.04111	-0.03848	0.02205	0.07332	0.04994	0.01155	0.00108	0.00459	0.05624	0.25735	0.43607	0.23171	-0.05224	-0.07484	-0.00737	0.05493	0.11661	0.08577	0.01056	0.000526661	-0.03671	-0.04677	0.11809	0.22804	0.0944	-0.01358	0.04129	0.05525	-0.05447	-0.10455	-0.0137	0.04027	0.04492	0.12639	0.17635	0.07354	-0.00126	0.01849
0.16125	-0.07036	-0.10786	-0.04747	0.02307	0.04285	-0.0024	-0.05184	-0.03369	0.03637	0.08793	0.03781	-0.04352	-0.04002	0.02218	0.07331	0.04975	0.01149	0.00108	0.00457	0.05588	0.25511	0.42961	0.22281	-0.0582	-0.07715	-0.0084	0.05256	0.11442	0.08926	0.0152	-0.000789588	-0.04196	-0.05314	0.1131	0.22577	0.09261	-0.01691	0.0389	0.05634	-0.05234	-0.10363	-0.01209	0.0418	0.0443	0.12925	0.18563	0.08133	-0.00108	0.01479
0.16149	-0.06618	-0.10146	-0.04471	0.02132	0.03911	-0.00519	-0.05317	-0.03384	0.03742	0.08994	0.03827	-0.04598	-0.04167	0.02211	0.07299	0.04936	0.01139	0.00108	0.00455	0.05552	0.25289	0.42329	0.214	-0.06432	-0.07962	-0.00949	0.05017	0.11226	0.09267	0.01977	-0.00194	-0.04701	-0.05952	0.10774	0.22298	0.09069	-0.02007	0.03638	0.05707	-0.05022	-0.10242	-0.01051	0.04315	0.04369	0.13219	0.19493	0.08901	-0.00111	0.01087
0.16174	-0.06205	-0.09512	-0.04197	0.01963	0.03551	-0.00777	-0.05423	-0.03383	0.03865	0.09223	0.03886	-0.04846	-0.04339	0.02183	0.07234	0.04878	0.01125	0.00107	0.00452	0.05515	0.25071	0.41711	0.20531	-0.0706	-0.08224	-0.01062	0.04779	0.11013	0.09599	0.02423	-0.00294	-0.05186	-0.06588	0.10203	0.21969	0.08865	-0.02306	0.03376	0.05745	-0.04809	-0.10094	-0.00895	0.04434	0.0431	0.13521	0.20423	0.09656	-0.00134	0.00677
0.16198	-0.05797	-0.08888	-0.03926	0.018	0.03206	-0.01011	-0.05504	-0.03366	0.04008	0.09483	0.03961	-0.05095	-0.0452	0.02134	0.07137	0.04801	0.01106	0.00105	0.0045	0.05478	0.24854	0.41107	0.19674	-0.07702	-0.085	-0.01178	0.04544	0.10807	0.0992	0.02858	-0.00379	-0.05648	-0.07219	0.09602	0.21589	0.08648	-0.02582	0.03108	0.05749	-0.04598	-0.09918	-0.00742	0.04537	0.04254	0.13831	0.21351	0.10396	-0.00176	0.0025
0.16222	-0.05398	-0.08276	-0.03659	0.01644	0.02879	-0.01223	-0.0556	-0.03332	0.04173	0.09775	0.04053	-0.05343	-0.04706	0.02065	0.07008	0.04704	0.01083	0.00103	0.00447	0.05441	0.24639	0.40515	0.18829	-0.08358	-0.0879	-0.01297	0.04313	0.10607	0.10228	0.03277	-0.00452	-0.06087	-0.0784	0.08975	0.21161	0.0842	-0.02836	0.02837	0.0572	-0.04387	-0.09715	-0.00592	0.04622	0.04203	0.1415	0.22276	0.11121	-0.00235	-0.00191
0.16246	-0.05009	-0.07679	-0.03399	0.01496	0.02569	-0.01413	-0.05593	-0.03282	0.04361	0.101	0.04165	-0.05586	-0.04897	0.01975	0.06847	0.04587	0.01055	0.00101	0.00444	0.05404	0.24426	0.39937	0.17995	-0.09028	-0.09095	-0.01419	0.04088	0.10414	0.10522	0.03679	-0.00512	-0.06502	-0.08449	0.08325	0.20686	0.08183	-0.03063	0.02565	0.05661	-0.04179	-0.09487	-0.00445	0.04692	0.04158	0.14476	0.23195	0.1183	-0.0031	-0.00644
0.16271	-0.04632	-0.07101	-0.03146	0.01356	0.02277	-0.0158	-0.05604	-0.03217	0.04573	0.10462	0.04298	-0.05822	-0.0509	0.01866	0.06654	0.04452	0.01023	0.000980601	0.00441	0.05366	0.24214	0.39369	0.17173	-0.09711	-0.09413	-0.01543	0.0387	0.10229	0.108	0.04061	-0.00562	-0.06892	-0.09042	0.07656	0.20168	0.07935	-0.03264	0.02296	0.05573	-0.03974	-0.09235	-0.00302	0.04745	0.04119	0.14809	0.24106	0.12521	-0.00399	-0.01104
0.16295	-0.04267	-0.06542	-0.02901	0.01224	0.02004	-0.01727	-0.05594	-0.03135	0.04809	0.10859	0.04455	-0.06049	-0.05285	0.01738	0.06429	0.04297	0.00987	0.000949655	0.00438	0.05328	0.24002	0.38812	0.16361	-0.10407	-0.09744	-0.01669	0.03661	0.10052	0.1106	0.04423	-0.00603	-0.07257	-0.09616	0.06973	0.19608	0.07679	-0.03437	0.02031	0.05458	-0.03771	-0.0896	-0.00163	0.04782	0.04087	0.15149	0.25007	0.13192	-0.00502	-0.01571
0.16319	-0.03918	-0.06006	-0.02665	0.011	0.01749	-0.01853	-0.05564	-0.0304	0.0507	0.11295	0.04638	-0.06263	-0.05479	0.01591	0.06175	0.04125	0.00947	0.000915341	0.00435	0.05289	0.2379	0.38264	0.15559	-0.11116	-0.10088	-0.01796	0.03459	0.09883	0.11302	0.04762	-0.00635	-0.07594	-0.10167	0.0628	0.1901	0.07416	-0.03582	0.01774	0.0532	-0.03572	-0.08665	-0.000291342	0.04803	0.04063	0.15494	0.25895	0.13843	-0.00616	-0.02042
0.16343	-0.03584	-0.05494	-0.02439	0.00985	0.01513	-0.0196	-0.05517	-0.02929	0.05356	0.11769	0.04848	-0.06462	-0.0567	0.01427	0.0589	0.03934	0.00903	0.000877774	0.00432	0.05249	0.23577	0.37722	0.14764	-0.11836	-0.10446	-0.01926	0.03266	0.09722	0.11525	0.05078	-0.0066	-0.07905	-0.10693	0.0558	0.18377	0.07147	-0.03697	0.01525	0.0516	-0.03377	-0.08351	0.0009924	0.04809	0.04047	0.15845	0.26768	0.14473	-0.00741	-0.02514
0.16368	-0.03267	-0.05006	-0.02224	0.00878	0.01295	-0.02048	-0.05454	-0.02806	0.05667	0.1228	0.05086	-0.06643	-0.05857	0.01246	0.05577	0.03727	0.00855	0.000837097	0.00429	0.05208	0.23362	0.37187	0.13978	-0.12568	-0.10815	-0.02057	0.03081	0.09569	0.11728	0.05369	-0.00679	-0.08188	-0.1119	0.04878	0.17712	0.06872	-0.03784	0.01288	0.04982	-0.03186	-0.08021	0.00221	0.04799	0.04039	0.16199	0.27622	0.15079	-0.00875	-0.02986
0.16392	-0.02966	-0.04545	-0.0202	0.00779	0.01095	-0.02119	-0.05377	-0.0267	0.06002	0.1283	0.05354	-0.06804	-0.06038	0.0105	0.05237	0.03504	0.00803	0.000793459	0.00425	0.05166	0.23145	0.36656	0.13199	-0.13309	-0.11195	-0.0219	0.02904	0.09423	0.1191	0.05636	-0.00692	-0.08444	-0.11655	0.04179	0.1702	0.06593	-0.03842	0.01064	0.04788	-0.02999	-0.07677	0.00337	0.04774	0.04039	0.16555	0.28456	0.1566	-0.01017	-0.03455
0.16416	-0.02683	-0.04111	-0.01828	0.00688	0.00912	-0.02175	-0.05287	-0.02522	0.0636	0.13416	0.05654	-0.06942	-0.06212	0.0084	0.04871	0.03265	0.00749	0.000747021	0.00422	0.05124	0.22926	0.36128	0.12426	-0.14059	-0.11585	-0.02325	0.02736	0.09285	0.12073	0.05879	-0.007	-0.0867	-0.12087	0.03486	0.16303	0.06311	-0.03872	0.00853	0.04581	-0.02817	-0.07322	0.00445	0.04735	0.04047	0.16912	0.29266	0.16216	-0.01166	-0.03919
0.1644	-0.02419	-0.03704	-0.01647	0.00604	0.00746	-0.02215	-0.05186	-0.02364	0.0674	0.14037	0.05984	-0.07056	-0.06376	0.00617	0.04481	0.03012	0.00691	0.000697986	0.00418	0.0508	0.22702	0.35602	0.1166	-0.14816	-0.11984	-0.02462	0.02576	0.09155	0.12215	0.06097	-0.00704	-0.08869	-0.12481	0.02803	0.15567	0.06027	-0.03876	0.00658	0.04364	-0.0264	-0.06958	0.00545	0.04682	0.04062	0.17267	0.30048	0.16743	-0.01322	-0.04377
0.16465	-0.02172	-0.03325	-0.01479	0.00527	0.00597	-0.02242	-0.05075	-0.02195	0.07141	0.14692	0.06346	-0.07145	-0.06531	0.00381	0.04069	0.02746	0.0063	0.000646567	0.00415	0.05034	0.22474	0.35076	0.10899	-0.15578	-0.12391	-0.02601	0.02424	0.09032	0.1234	0.06293	-0.00704	-0.09037	-0.12837	0.02134	0.14816	0.05742	-0.03854	0.00479	0.04139	-0.02467	-0.06588	0.00637	0.04615	0.04083	0.17618	0.30801	0.17241	-0.01482	-0.04827
0.16489	-0.01943	-0.02974	-0.01323	0.00458	0.00463	-0.02256	-0.04955	-0.02019	0.0756	0.15377	0.06738	-0.07206	-0.06675	0.00135	0.03637	0.02468	0.00567	0.000592994	0.00411	0.04987	0.22242	0.34549	0.10143	-0.16344	-0.12803	-0.02741	0.02279	0.08917	0.12446	0.06466	-0.007	-0.09177	-0.13152	0.01484	0.14054	0.05458	-0.03809	0.00316	0.0391	-0.023	-0.06214	0.0072	0.04535	0.0411	0.17964	0.31519	0.17708	-0.01647	-0.05267
0.16513	-0.01731	-0.02649	-0.01179	0.00395	0.00345	-0.02258	-0.04828	-0.01834	0.07996	0.1609	0.0716	-0.07239	-0.06806	-0.0012	0.03187	0.0218	0.00501	0.000537542	0.00407	0.04939	0.22004	0.34018	0.09392	-0.1711	-0.1322	-0.02882	0.02142	0.08811	0.12538	0.06619	-0.00692	-0.09286	-0.13422	0.00856	0.13286	0.05175	-0.03742	0.0017	0.03679	-0.02138	-0.0584	0.00793	0.04442	0.04143	0.18301	0.322	0.18143	-0.01815	-0.05696
0.16537	-0.01537	-0.02351	-0.01046	0.00339	0.00241	-0.02249	-0.04696	-0.01644	0.08446	0.16827	0.07609	-0.07244	-0.06926	-0.00382	0.02722	0.01883	0.00433	0.000480503	0.00402	0.04888	0.21759	0.33483	0.08645	-0.17876	-0.1364	-0.03024	0.02013	0.08714	0.12615	0.06753	-0.0068	-0.09365	-0.13648	0.00255	0.12516	0.04895	-0.03654	0.000396262	0.03447	-0.01981	-0.05467	0.00857	0.04338	0.04179	0.18628	0.3284	0.18543	-0.01985	-0.06111
0.16562	-0.01359	-0.02078	-0.00925	0.00289	0.00151	-0.0223	-0.04558	-0.01448	0.08908	0.17584	0.08085	-0.07221	-0.07032	-0.00651	0.02244	0.01579	0.00364	0.000422177	0.00398	0.04836	0.21507	0.32942	0.07902	-0.1864	-0.14061	-0.03167	0.01892	0.08627	0.12682	0.06869	-0.00665	-0.09413	-0.13826	-0.00317	0.11749	0.04618	-0.03549	-0.000741024	0.03217	-0.0183	-0.05098	0.00911	0.04224	0.04218	0.18941	0.33436	0.18909	-0.02155	-0.06512
0.16586	-0.01197	-0.0183	-0.00815	0.00246	0.000744488	-0.02202	-0.04416	-0.01248	0.09378	0.18356	0.08583	-0.07172	-0.07125	-0.00923	0.01758	0.0127	0.00294	0.000362904	0.00394	0.04782	0.21247	0.32393	0.07162	-0.19399	-0.14482	-0.0331	0.01777	0.08552	0.1274	0.06971	-0.00644	-0.09431	-0.13955	-0.00856	0.10989	0.04346	-0.03429	-0.00172	0.02991	-0.01685	-0.04735	0.00955	0.04099	0.0426	0.19238	0.33985	0.19238	-0.02326	-0.06897
0.1661	-0.0105	-0.01605	-0.00715	0.00207	0.000102661	-0.02165	-0.04271	-0.01045	0.09853	0.19139	0.09101	-0.07096	-0.07206	-0.01197	0.01265	0.00958	0.00223	0.000303033	0.00389	0.04725	0.20978	0.31834	0.06423	-0.20153	-0.14902	-0.03455	0.0167	0.08488	0.12793	0.07061	-0.00619	-0.09418	-0.14036	-0.0136	0.10241	0.0408	-0.03295	-0.00255	0.02769	-0.01547	-0.04381	0.00989	0.03966	0.04302	0.19517	0.34485	0.1953	-0.02495	-0.07263
0.16634	-0.00918	-0.01402	-0.00625	0.00175	-0.000421523	-0.0212	-0.04124	-0.00841	0.10331	0.19928	0.09636	-0.06997	-0.07274	-0.01471	0.00771	0.00644	0.00152	0.000242917	0.00384	0.04666	0.20699	0.31264	0.05687	-0.209	-0.15319	-0.03601	0.0157	0.08438	0.12843	0.0714	-0.00589	-0.09375	-0.14067	-0.01825	0.09507	0.0382	-0.0315	-0.00325	0.02553	-0.01415	-0.04037	0.01013	0.03825	0.04344	0.19776	0.34932	0.19784	-0.02661	-0.07611
0.16659	-0.00799	-0.0122	-0.00544	0.00147	-0.000835621	-0.02068	-0.03975	-0.00637	0.10808	0.20717	0.10182	-0.06878	-0.07329	-0.01742	0.00277	0.00332	0.000813221	0.000182917	0.00379	0.04605	0.2041	0.3068	0.0495	-0.21638	-0.15733	-0.03748	0.01475	0.08403	0.12895	0.07211	-0.00553	-0.09302	-0.14048	-0.02251	0.08791	0.03568	-0.02996	-0.0038	0.02345	-0.01291	-0.03706	0.01027	0.03677	0.04385	0.20011	0.35324	0.20001	-0.02823	-0.07937
0.16683	-0.00692	-0.01058	-0.00471	0.00123	-0.00115	-0.02009	-0.03826	-0.00433	0.11279	0.215	0.10736	-0.0674	-0.07374	-0.02009	-0.00213	0.000219819	0.000111137	0.000123398	0.00373	0.04541	0.20111	0.30082	0.04215	-0.22366	-0.16143	-0.03898	0.01387	0.08385	0.12951	0.07278	-0.00512	-0.092	-0.13979	-0.02636	0.08097	0.03323	-0.02836	-0.00424	0.02145	-0.01173	-0.03388	0.01032	0.03524	0.04423	0.20221	0.35659	0.20179	-0.02978	-0.08242
0.16707	-0.00597	-0.00912	-0.00407	0.00104	-0.00136	-0.01943	-0.03676	-0.00233	0.11743	0.22273	0.11292	-0.06589	-0.07409	-0.0227	-0.00694	-0.00283	-0.000579908	6.47219e-05	0.00368	0.04474	0.198	0.29469	0.03479	-0.23081	-0.16548	-0.04052	0.01303	0.08385	0.13016	0.07341	-0.00464	-0.09068	-0.13862	-0.02979	0.07427	0.03087	-0.02672	-0.00457	0.01954	-0.01062	-0.03086	0.01029	0.03367	0.04459	0.20403	0.35937	0.20321	-0.03126	-0.08522
0.16731	-0.00513	-0.00784	-0.00349	0.000879567	-0.00149	-0.01872	-0.03526	-0.000350254	0.12197	0.23029	0.11844	-0.06428	-0.07436	-0.02522	-0.01164	-0.00581	-0.00126	7.24276e-06	0.00362	0.04405	0.19477	0.2884	0.02744	-0.23784	-0.16947	-0.04209	0.01224	0.08404	0.13091	0.07404	-0.00411	-0.0891	-0.13698	-0.0328	0.06784	0.02859	-0.02506	-0.0048	0.01772	-0.00959	-0.02799	0.01018	0.03207	0.0449	0.20557	0.36156	0.20426	-0.03265	-0.08778
0.16756	-0.00438	-0.0067	-0.00298	0.000755095	-0.00153	-0.01793	-0.03376	0.00159	0.12636	0.23765	0.12389	-0.06262	-0.07457	-0.02765	-0.0162	-0.0087	-0.00191	-4.8689e-05	0.00356	0.04333	0.19143	0.28195	0.02007	-0.24473	-0.1734	-0.04372	0.01147	0.08443	0.1318	0.07467	-0.00352	-0.08725	-0.13489	-0.03538	0.06169	0.02641	-0.02339	-0.00494	0.01601	-0.00862	-0.02528	0.00999	0.03045	0.04516	0.2068	0.36315	0.20495	-0.03392	-0.09007
0.1678	-0.00372	-0.00569	-0.00253	0.000660764	-0.00149	-0.01708	-0.03225	0.00347	0.13059	0.24473	0.12919	-0.06096	-0.07473	-0.02996	-0.02057	-0.01149	-0.00254	-0.000102728	0.0035	0.04258	0.18797	0.27532	0.0127	-0.25147	-0.17727	-0.04541	0.01073	0.08504	0.13287	0.07534	-0.00287	-0.08516	-0.13236	-0.03753	0.05584	0.02432	-0.02173	-0.00499	0.0144	-0.00773	-0.02274	0.00974	0.02882	0.04537	0.20771	0.36414	0.20531	-0.03507	-0.09209
0.16804	-0.00314	-0.0048	-0.00213	0.000595124	-0.00138	-0.01616	-0.03074	0.00531	0.13463	0.25151	0.1343	-0.05936	-0.07487	-0.03215	-0.02474	-0.01415	-0.00315	-0.000154552	0.00343	0.04181	0.18439	0.26851	0.00531	-0.25806	-0.18107	-0.04717	0.01	0.08587	0.13413	0.07606	-0.00217	-0.08284	-0.12942	-0.03928	0.05031	0.02233	-0.0201	-0.00498	0.0129	-0.0069	-0.02037	0.00944	0.0272	0.04552	0.2083	0.36454	0.20535	-0.03606	-0.09382
0.16828	-0.00264	-0.00403	-0.00178	0.000557142	-0.00118	-0.01516	-0.02921	0.00708	0.13845	0.25794	0.13915	-0.05785	-0.07502	-0.03419	-0.02867	-0.01667	-0.00372	-0.000203843	0.00337	0.04102	0.18071	0.26153	-0.0021	-0.26452	-0.18483	-0.04902	0.00927	0.08692	0.13559	0.07683	-0.00142	-0.08031	-0.1261	-0.04061	0.0451	0.02044	-0.01851	-0.00491	0.01151	-0.00614	-0.01818	0.0091	0.0256	0.0456	0.20854	0.36435	0.2051	-0.03688	-0.09526
0.16853	-0.00219	-0.00334	-0.00148	0.000546125	-0.000895196	-0.01407	-0.02767	0.0088	0.14204	0.26396	0.1437	-0.05651	-0.07519	-0.03607	-0.03234	-0.01903	-0.00426	-0.000250297	0.0033	0.0402	0.17691	0.25437	-0.00954	-0.27083	-0.18852	-0.05096	0.00853	0.08821	0.13729	0.07767	-0.00062077	-0.0776	-0.12243	-0.04156	0.04023	0.01866	-0.01697	-0.00479	0.01022	-0.00545	-0.01615	0.00871	0.02403	0.04561	0.20845	0.36357	0.20458	-0.03751	-0.0964
0.16877	-0.0018	-0.00275	-0.00121	0.000562746	-0.000527319	-0.01288	-0.0261	0.01045	0.14539	0.26956	0.14789	-0.05538	-0.0754	-0.0378	-0.03572	-0.02122	-0.00476	-0.000293663	0.00323	0.03936	0.173	0.24704	-0.01702	-0.27702	-0.19218	-0.05302	0.00776	0.08972	0.13922	0.07858	0.000219793	-0.07472	-0.11845	-0.04214	0.0357	0.01698	-0.01549	-0.00463	0.00904	-0.00481	-0.01428	0.00829	0.02249	0.04555	0.20801	0.36224	0.20382	-0.03792	-0.09723
0.16901	-0.00147	-0.00224	-0.000970861	0.000608017	-6.71189e-05	-0.01159	-0.0245	0.01203	0.14846	0.27468	0.15167	-0.05451	-0.0757	-0.03935	-0.0388	-0.02323	-0.00522	-0.000333703	0.00316	0.0385	0.169	0.23952	-0.02456	-0.2831	-0.1958	-0.0552	0.00695	0.09146	0.14139	0.07958	0.0011	-0.0717	-0.11419	-0.04236	0.0315	0.01541	-0.01407	-0.00443	0.00796	-0.00424	-0.01258	0.00785	0.021	0.04542	0.20723	0.36037	0.20285	-0.0381	-0.09775
0.16925	-0.00118	-0.0018	-0.000766526	0.000682959	0.000491125	-0.01017	-0.02286	0.01355	0.15126	0.27931	0.15499	-0.05397	-0.07609	-0.04072	-0.04156	-0.02505	-0.00564	-0.000370203	0.0031	0.03763	0.1649	0.23183	-0.03217	-0.28908	-0.1994	-0.05751	0.00608	0.0934	0.14379	0.08066	0.00201	-0.06856	-0.10969	-0.04225	0.02763	0.01394	-0.01272	-0.0042	0.00698	-0.00372	-0.01103	0.00739	0.01955	0.0452	0.20611	0.35798	0.20172	-0.03803	-0.09796
0.1695	-0.000934361	-0.00143	-0.00058959	0.000788625	0.00115	-0.00862	-0.02117	0.015	0.15377	0.28342	0.15781	-0.05379	-0.0766	-0.04191	-0.04398	-0.02667	-0.00601	-0.000403037	0.00303	0.03675	0.16071	0.22396	-0.03987	-0.29499	-0.20299	-0.05998	0.00515	0.09554	0.14643	0.08183	0.00295	-0.06533	-0.10498	-0.04184	0.02409	0.01257	-0.01145	-0.00395	0.00609	-0.00325	-0.00962	0.00692	0.01816	0.04492	0.20467	0.35512	0.20046	-0.03769	-0.09787
0.16974	-0.00072806	-0.00111	-0.000436832	0.000926075	0.00193	-0.00693	-0.01942	0.01638	0.15598	0.28699	0.1601	-0.05401	-0.07725	-0.04291	-0.04606	-0.02808	-0.00634	-0.000432102	0.00296	0.03585	0.15645	0.21592	-0.04767	-0.30085	-0.20659	-0.06261	0.00412	0.09787	0.14928	0.08307	0.00391	-0.06203	-0.10011	-0.04114	0.02087	0.0113	-0.01025	-0.00368	0.00529	-0.00283	-0.00836	0.00645	0.01683	0.04455	0.2029	0.35181	0.19911	-0.03706	-0.09748
0.16998	-0.000556763	-0.000852774	-0.000305106	0.0011	0.00282	-0.00507	-0.0176	0.0177	0.1579	0.29002	0.16182	-0.05469	-0.07806	-0.04372	-0.04778	-0.02929	-0.00663	-0.000457315	0.00289	0.03494	0.15211	0.2077	-0.0556	-0.30669	-0.21022	-0.06542	0.003	0.10035	0.15234	0.08439	0.00489	-0.05867	-0.09512	-0.0402	0.01795	0.01013	-0.00913	-0.00341	0.00457	-0.00245	-0.00723	0.00598	0.01556	0.04411	0.20084	0.3481	0.19772	-0.03614	-0.0968
0.17022	-0.000416762	-0.000639166	-0.000191583	0.0013	0.00383	-0.00303	-0.01569	0.01896	0.15953	0.29249	0.16295	-0.05584	-0.07904	-0.04435	-0.04916	-0.03029	-0.00686	-0.000478679	0.00282	0.03403	0.14771	0.19932	-0.06366	-0.31252	-0.21388	-0.06843	0.00176	0.10297	0.15556	0.08576	0.00588	-0.0553	-0.09004	-0.03903	0.01533	0.00905	-0.00809	-0.00313	0.00394	-0.00212	-0.00622	0.00551	0.01436	0.0436	0.19849	0.34404	0.19634	-0.0349	-0.09586
0.17047	-0.0003044	-0.000467262	-9.35119e-05	0.00154	0.00498	-0.000794256	-0.01369	0.02016	0.16088	0.29443	0.16349	-0.05749	-0.0802	-0.04478	-0.05018	-0.03108	-0.00706	-0.000496215	0.00276	0.03312	0.14325	0.19078	-0.07188	-0.31837	-0.21761	-0.07164	0.000391274	0.1057	0.15892	0.08718	0.00688	-0.05192	-0.08491	-0.03767	0.01298	0.00806	-0.00714	-0.00286	0.00337	-0.00183	-0.00533	0.00506	0.01322	0.04302	0.19588	0.33968	0.19501	-0.03335	-0.09465
0.17071	-0.000216075	-0.00033145	-8.27188e-06	0.00181	0.00626	0.00165	-0.01159	0.02131	0.16195	0.29585	0.16343	-0.05966	-0.08156	-0.04503	-0.05085	-0.03167	-0.0072	-0.000509957	0.00269	0.0322	0.13875	0.18208	-0.08027	-0.32427	-0.22141	-0.07506	-0.00112	0.10852	0.16239	0.08862	0.00787	-0.04856	-0.07978	-0.03616	0.01089	0.00715	-0.00627	-0.00259	0.00286	-0.00157	-0.00454	0.00462	0.01215	0.04237	0.19304	0.33508	0.19379	-0.03147	-0.09321
0.17095	-0.000148398	-0.000226653	6.62304e-05	0.00211	0.00768	0.00431	-0.00937	0.02243	0.16277	0.29676	0.16279	-0.06235	-0.08312	-0.04509	-0.05117	-0.03206	-0.00731	-0.000519985	0.00263	0.03128	0.1342	0.17323	-0.08884	-0.33023	-0.22529	-0.0787	-0.00277	0.11141	0.16592	0.09007	0.00884	-0.04525	-0.07467	-0.03451	0.00905	0.00632	-0.00547	-0.00234	0.00242	-0.00134	-0.00384	0.0042	0.01115	0.04167	0.18998	0.3303	0.19272	-0.02925	-0.09156
0.17119	-9.80323e-05	-0.000147927	0.000131957	0.00245	0.00926	0.00722	-0.00701	0.0235	0.16336	0.29721	0.16158	-0.06556	-0.08488	-0.04498	-0.05117	-0.03225	-0.00737	-0.000526391	0.00257	0.03037	0.12962	0.16423	-0.09761	-0.33628	-0.22928	-0.08257	-0.00457	0.11433	0.16948	0.09149	0.0098	-0.04199	-0.06963	-0.03276	0.00743	0.00556	-0.00476	-0.00211	0.00203	-0.00114	-0.00323	0.0038	0.01022	0.04092	0.18676	0.32539	0.19185	-0.0267	-0.08971
0.17144	-6.1759e-05	-9.05022e-05	0.00019083	0.00283	0.01099	0.01038	-0.00451	0.02456	0.16373	0.29724	0.15982	-0.06927	-0.08683	-0.04469	-0.05084	-0.03226	-0.00739	-0.000529276	0.00251	0.02946	0.12502	0.15509	-0.10657	-0.34242	-0.23337	-0.08667	-0.00652	0.11726	0.17302	0.09287	0.01072	-0.03882	-0.06469	-0.03095	0.00601	0.00488	-0.00412	-0.00188	0.00169	-0.000967353	-0.00269	0.00343	0.00935	0.04012	0.18338	0.32041	0.19123	-0.02381	-0.0877
0.17168	-3.68168e-05	-5.02999e-05	0.000244612	0.00324	0.01289	0.01382	-0.00185	0.02559	0.16392	0.29689	0.15757	-0.07348	-0.08897	-0.04423	-0.0502	-0.03209	-0.00737	-0.000528775	0.00245	0.02857	0.12041	0.14583	-0.11574	-0.34867	-0.23758	-0.09099	-0.00862	0.12018	0.17651	0.09418	0.0116	-0.03574	-0.05988	-0.0291	0.00478	0.00426	-0.00354	-0.00168	0.00139	-0.000813484	-0.00223	0.00308	0.00856	0.03928	0.17989	0.31544	0.19091	-0.02058	-0.08554
0.17192	-2.05599e-05	-2.34163e-05	0.000295029	0.00369	0.01497	0.01756	0.000982228	0.02662	0.16395	0.2962	0.15486	-0.07813	-0.09129	-0.04361	-0.04926	-0.03175	-0.00732	-0.000525034	0.0024	0.02768	0.1158	0.13645	-0.12511	-0.35503	-0.24192	-0.09554	-0.01086	0.12307	0.17988	0.09539	0.01243	-0.03276	-0.05521	-0.02722	0.00373	0.0037	-0.00304	-0.00149	0.00113	-0.000677956	-0.00182	0.00276	0.00782	0.03842	0.17633	0.31052	0.19093	-0.01701	-0.08326
0.17216	-1.05155e-05	-6.17841e-06	0.000343758	0.00418	0.01724	0.02162	0.00401	0.02765	0.16385	0.29525	0.15173	-0.08322	-0.09377	-0.04284	-0.04806	-0.03126	-0.00723	-0.000518205	0.00235	0.02682	0.11119	0.12696	-0.13469	-0.36152	-0.24638	-0.10031	-0.01324	0.1259	0.18312	0.09648	0.01321	-0.02992	-0.05072	-0.02535	0.00282	0.0032	-0.00259	-0.00132	0.000914617	-0.000558208	-0.00147	0.00246	0.00715	0.03754	0.17271	0.30573	0.19134	-0.01311	-0.08089
0.17241	-4.90199e-06	4.16133e-06	0.000392296	0.00472	0.01971	0.02602	0.00724	0.02869	0.16365	0.29408	0.14825	-0.08869	-0.09641	-0.04194	-0.0466	-0.03062	-0.00711	-0.000508478	0.00231	0.02597	0.1066	0.11737	-0.14448	-0.36814	-0.25097	-0.10529	-0.01573	0.12867	0.18617	0.09742	0.01392	-0.0272	-0.04643	-0.02351	0.00205	0.00275	-0.00219	-0.00116	0.000729219	-0.000452688	-0.00116	0.00219	0.00654	0.03665	0.16909	0.30111	0.19215	-0.0089	-0.07847
0.17265	-2.11047e-06	1.01192e-05	0.000442095	0.0053	0.02239	0.03077	0.0107	0.02975	0.16338	0.29275	0.14447	-0.09449	-0.09917	-0.0409	-0.04491	-0.02985	-0.00696	-0.00049605	0.00227	0.02515	0.10204	0.1077	-0.15446	-0.37488	-0.25569	-0.11047	-0.01833	0.13135	0.18899	0.09819	0.01456	-0.02463	-0.04234	-0.0217	0.00141	0.00235	-0.00185	-0.00101	0.000573949	-0.000360095	-0.000901209	0.00195	0.00599	0.03576	0.16549	0.29673	0.19341	-0.00439	-0.07603
0.17289	-7.34738e-07	1.38996e-05	0.000494444	0.00593	0.02528	0.0359	0.01438	0.03083	0.16307	0.29132	0.14047	-0.10057	-0.10204	-0.03975	-0.04302	-0.02896	-0.00679	-0.000481121	0.00223	0.02436	0.09753	0.09797	-0.16464	-0.38175	-0.26054	-0.11585	-0.02102	0.13393	0.19156	0.09878	0.01513	-0.0222	-0.03846	-0.01995	0.000871442	0.00199	-0.00154	-0.00087548	0.000445381	-0.000279286	-0.000678947	0.00173	0.00549	0.03487	0.16195	0.29263	0.19513	0.00040389	-0.07359
0.17313	-1.78611e-07	1.64603e-05	0.000549981	0.0066	0.0284	0.04141	0.01831	0.03194	0.16275	0.28985	0.13629	-0.10687	-0.10499	-0.03849	-0.04095	-0.02797	-0.00659	-0.000463901	0.00221	0.0236	0.09307	0.08819	-0.175	-0.38875	-0.26552	-0.12139	-0.02378	0.1364	0.19384	0.09916	0.01561	-0.01992	-0.03481	-0.01826	0.000431102	0.00168	-0.00128	-0.000752388	0.000340285	-0.000209755	-0.000492087	0.00153	0.00504	0.034	0.1585	0.28885	0.19734	0.00545	-0.07121
0.17338	-4.8429e-08	1.84471e-05	0.000609184	0.00733	0.03175	0.04732	0.02249	0.03308	0.16243	0.28839	0.13201	-0.11334	-0.108	-0.03714	-0.03872	-0.02689	-0.00637	-0.0004446	0.00219	0.02287	0.08868	0.07838	-0.18553	-0.39587	-0.27063	-0.12708	-0.02657	0.13877	0.19581	0.09932	0.01602	-0.01779	-0.03139	-0.01665	7.60097e-05	0.00141	-0.00104	-0.000639371	0.000255481	-0.000151153	-0.000337807	0.00135	0.00464	0.03315	0.15516	0.28545	0.20003	0.01072	-0.06891
0.17362	-1.43493e-08	2.04013e-05	0.000672452	0.00811	0.03533	0.05364	0.02693	0.03426	0.16215	0.287	0.1277	-0.11992	-0.11105	-0.03571	-0.03636	-0.02574	-0.00614	-0.000423428	0.00217	0.02219	0.08437	0.06856	-0.19621	-0.40311	-0.27586	-0.1329	-0.02937	0.14101	0.19744	0.09925	0.01633	-0.01581	-0.0282	-0.01511	-0.000204548	0.00118	-0.000838451	-0.000535631	0.000187919	-0.000103079	-0.000213365	0.00119	0.00428	0.03232	0.15197	0.28245	0.20322	0.01617	-0.06674
0.17386	-1.79367e-09	2.24451e-05	0.000739871	0.00894	0.03915	0.06037	0.03163	0.03547	0.16192	0.28572	0.1234	-0.12653	-0.1141	-0.03422	-0.0339	-0.02452	-0.0059	-0.000400578	0.00217	0.02155	0.08015	0.05877	-0.20702	-0.41046	-0.2812	-0.13883	-0.03214	0.14315	0.19872	0.09893	0.01656	-0.01398	-0.02523	-0.01366	-0.000419485	0.000978534	-0.00066002	-0.000441019	0.000135074	-6.49159e-05	-0.000116315	0.00104	0.00396	0.03153	0.14893	0.27988	0.20689	0.02178	-0.06473
0.1741	0	2.45962e-05	0.000811447	0.00982	0.04321	0.06751	0.03658	0.03673	0.16177	0.28461	0.11918	-0.13314	-0.11713	-0.03267	-0.03135	-0.02325	-0.00564	-0.00037624	0.00217	0.02096	0.07604	0.04902	-0.21793	-0.41789	-0.28664	-0.14483	-0.03486	0.14519	0.19963	0.09836	0.0167	-0.0123	-0.02249	-0.01229	-0.000577261	0.000809804	-0.000505681	-0.000355546	9.45493e-05	-3.59946e-05	-4.42897e-05	0.000905529	0.00367	0.03077	0.14608	0.27776	0.21103	0.02751	-0.06292
0.17435	0	2.68686e-05	0.000887169	0.01075	0.0475	0.07507	0.0418	0.03803	0.16172	0.2837	0.11509	-0.13967	-0.12011	-0.03108	-0.02874	-0.02195	-0.00537	-0.000350605	0.00218	0.02042	0.07206	0.03934	-0.22891	-0.4254	-0.29217	-0.15089	-0.03749	0.14714	0.20018	0.09754	0.01675	-0.01076	-0.01997	-0.01102	-0.000686091	0.000668059	-0.00037362	-0.0002793	6.40619e-05	-1.55237e-05	5.29757e-06	0.000777251	0.0034	0.03004	0.14342	0.2761	0.21562	0.0333	-0.06133
0.17459	0	2.92624e-05	0.000966943	0.01173	0.05202	0.08303	0.04728	0.03936	0.16177	0.28301	0.11117	-0.14609	-0.12304	-0.02946	-0.02609	-0.02062	-0.0051	-0.000323858	0.0022	0.01993	0.06821	0.02978	-0.23992	-0.43296	-0.29778	-0.15696	-0.03999	0.149	0.20036	0.09647	0.01671	-0.00936	-0.01765	-0.00983	-0.000753199	0.00054959	-0.000262959	-0.000212664	4.17843e-05	-2.22561e-06	3.58965e-05	0.000657336	0.00316	0.02935	0.14096	0.27489	0.22061	0.03913	-0.05998
0.17483	0	3.17742e-05	0.00105	0.01277	0.05677	0.09139	0.05299	0.04073	0.16195	0.28259	0.10745	-0.15235	-0.12588	-0.02782	-0.02343	-0.01927	-0.00483	-0.000296187	0.00223	0.01949	0.06451	0.02036	-0.25091	-0.44055	-0.30345	-0.16304	-0.04233	0.15081	0.20018	0.09515	0.01659	-0.0081	-0.01554	-0.00872	-0.000785563	0.000450637	-0.000173057	-0.000156098	2.60024e-05	5.29867e-06	5.11733e-05	0.000546124	0.00294	0.0287	0.13871	0.27413	0.22599	0.04494	-0.0589
0.17507	0	3.43998e-05	0.00114	0.01384	0.06174	0.10014	0.05895	0.04212	0.16224	0.28244	0.10397	-0.15842	-0.12862	-0.02618	-0.02077	-0.01792	-0.00455	-0.000267779	0.00227	0.01911	0.06097	0.01112	-0.26184	-0.44812	-0.30918	-0.16909	-0.04448	0.15257	0.19964	0.09358	0.01638	-0.00696	-0.01363	-0.00771	-0.000789959	0.000367637	-0.000103034	-0.000109857	1.5121e-05	8.44423e-06	5.47902e-05	0.000444191	0.00275	0.02809	0.13667	0.27382	0.23169	0.05069	-0.05811
0.17532	0	3.71326e-05	0.00123	0.01497	0.06691	0.10924	0.06511	0.04352	0.16266	0.28258	0.10074	-0.16426	-0.13125	-0.02456	-0.01813	-0.01657	-0.00427	-0.000238828	0.00232	0.01879	0.05761	0.0021	-0.27266	-0.45567	-0.31495	-0.17508	-0.0464	0.15431	0.19878	0.09178	0.0161	-0.00593	-0.0119	-0.00678	-0.000772372	0.000297812	-5.10592e-05	-7.33947e-05	8.02114e-06	8.58978e-06	5.03925e-05	0.000353067	0.00257	0.02752	0.13485	0.27392	0.23766	0.05634	-0.0576
0.17556	0	3.99655e-05	0.00132	0.01613	0.07228	0.11868	0.07146	0.0449	0.16319	0.283	0.09776	-0.16985	-0.13376	-0.02297	-0.01554	-0.01524	-0.004	-0.00020953	0.00237	0.01852	0.05443	-0.00666	-0.28331	-0.46314	-0.32074	-0.18099	-0.04806	0.15604	0.19759	0.08977	0.01574	-0.00502	-0.01034	-0.00593	-0.000738585	0.00023858	-1.50662e-05	-4.59594e-05	3.70266e-06	7.10996e-06	4.16215e-05	0.000274517	0.00242	0.02699	0.13323	0.27441	0.24384	0.06184	-0.0574
0.1758	0	4.28905e-05	0.00142	0.01733	0.07782	0.12842	0.07797	0.04625	0.16383	0.2837	0.09505	-0.17518	-0.13614	-0.02141	-0.01301	-0.01394	-0.00373	-0.000180079	0.00243	0.01831	0.05144	-0.01512	-0.29373	-0.47051	-0.32653	-0.1868	-0.04943	0.15778	0.19611	0.08755	0.01532	-0.00422	-0.00894	-0.00516	-0.000693961	0.000187667	7.19719e-06	-2.66506e-05	1.24888e-06	5.20027e-06	3.16948e-05	0.000209879	0.00229	0.0265	0.13182	0.27525	0.25017	0.06715	-0.05749
0.17604	0	4.58967e-05	0.00152	0.01857	0.08352	0.13843	0.08459	0.04754	0.16455	0.28466	0.09258	-0.18024	-0.1384	-0.01992	-0.01055	-0.01266	-0.00346	-0.000150661	0.0025	0.01815	0.04866	-0.02323	-0.30387	-0.47775	-0.33233	-0.19247	-0.05051	0.15954	0.19436	0.08514	0.01484	-0.00351	-0.00769	-0.00447	-0.000642183	0.000144031	1.87198e-05	-1.39646e-05	7.66125e-08	3.33976e-06	2.21363e-05	0.000158771	0.00218	0.02606	0.1306	0.2764	0.25657	0.07221	-0.05788
0.17629	0	4.89728e-05	0.00162	0.01983	0.08935	0.14867	0.09128	0.04873	0.16533	0.28586	0.09034	-0.18504	-0.14053	-0.0185	-0.0082	-0.01142	-0.0032	-0.000121459	0.00257	0.01805	0.0461	-0.03097	-0.31366	-0.48482	-0.3381	-0.198	-0.05126	0.16135	0.19236	0.08257	0.01429	-0.00289	-0.00658	-0.00384	-0.000586514	0.000106936	2.26748e-05	-6.24688e-06	-3.13986e-07	1.82834e-06	1.40463e-05	0.000120382	0.00209	0.02566	0.12957	0.2778	0.26295	0.077	-0.05854
0.17653	0	5.21063e-05	0.00173	0.02112	0.09529	0.15907	0.098	0.04979	0.16615	0.28728	0.08832	-0.18956	-0.14254	-0.01716	-0.00595	-0.01023	-0.00295	-9.26406e-05	0.00265	0.01799	0.04375	-0.03829	-0.32306	-0.49168	-0.34383	-0.20336	-0.05167	0.1632	0.19013	0.07984	0.0137	-0.00235	-0.00559	-0.00329	-0.000529828	7.57336e-05	2.19862e-05	-1.95518e-06	-3.59994e-07	8.84359e-07	8.2524e-06	9.36066e-05	0.00202	0.02531	0.1287	0.2794	0.26925	0.08146	-0.05947
0.17677	0	5.52822e-05	0.00183	0.02242	0.10131	0.1696	0.10468	0.05068	0.16698	0.28887	0.08647	-0.19384	-0.14443	-0.01592	-0.00382	-0.00909	-0.00271	-6.4312e-05	0.00273	0.01799	0.04162	-0.04516	-0.33199	-0.49831	-0.34952	-0.20853	-0.05173	0.1651	0.18771	0.07699	0.01307	-0.00188	-0.00472	-0.00279	-0.000473445	5.01181e-05	1.85823e-05	4.50729e-09	-2.47468e-07	3.99938e-07	4.49054e-06	7.61703e-05	0.00197	0.025	0.12797	0.28114	0.27537	0.08557	-0.06064
0.17701	0	5.84847e-05	0.00194	0.02374	0.10737	0.18018	0.11128	0.05135	0.16779	0.2906	0.08477	-0.19788	-0.14622	-0.01479	-0.00182	-0.00801	-0.00248	-3.65637e-05	0.00282	0.01802	0.03971	-0.05154	-0.34041	-0.50466	-0.35515	-0.21349	-0.05145	0.16705	0.18511	0.07403	0.0124	-0.00148	-0.00396	-0.00235	-0.000418294	2.98707e-05	1.41424e-05	6.14091e-07	-9.97089e-08	1.85625e-07	2.22385e-06	6.55059e-05	0.00193	0.02472	0.12737	0.28294	0.28123	0.08928	-0.06202
0.17726	0	6.16972e-05	0.00205	0.02506	0.11346	0.19076	0.11772	0.05176	0.16854	0.29243	0.08318	-0.20172	-0.14792	-0.01379	3.71275e-05	-0.00698	-0.00226	-9.42813e-06	0.0029	0.01809	0.03802	-0.0574	-0.34826	-0.51071	-0.3607	-0.21823	-0.05082	0.16906	0.18235	0.07098	0.0117	-0.00114	-0.00329	-0.00197	-0.000365225	1.46901e-05	1.00758e-05	7.16e-07	-1.44788e-08	7.94584e-08	9.56494e-07	5.92646e-05	0.0019	0.02448	0.12688	0.28475	0.28673	0.09258	-0.06358
0.1775	0	6.49013e-05	0.00216	0.02638	0.11952	0.20126	0.12394	0.05187	0.1692	0.29432	0.08165	-0.20537	-0.14954	-0.01291	0.00175	-0.00601	-0.00205	1.72929e-05	0.00299	0.01819	0.03655	-0.06273	-0.35548	-0.51642	-0.36616	-0.22274	-0.04984	0.1711	0.17947	0.06786	0.01097	-0.000853042	-0.00272	-0.00163	-0.000314748	3.94673e-06	6.71235e-06	5.94811e-07	1.26098e-08	2.94306e-08	3.56791e-07	5.59733e-05	0.00187	0.02427	0.12646	0.28649	0.2918	0.09542	-0.06527
0.17774	0	6.80776e-05	0.00226	0.02768	0.12553	0.21161	0.12986	0.05163	0.16972	0.29622	0.08013	-0.20889	-0.15112	-0.01218	0.00332	-0.0051	-0.00185	4.38555e-05	0.00308	0.01832	0.03529	-0.06748	-0.36202	-0.52177	-0.37153	-0.22701	-0.04854	0.17318	0.17647	0.06469	0.01022	-0.000616858	-0.00222	-0.00134	-0.000267292	-3.07132e-06	4.11177e-06	3.95632e-07	1.14828e-08	1.10216e-08	1.34099e-07	5.43773e-05	0.00185	0.02408	0.1261	0.28809	0.29635	0.0978	-0.06706
0.17798	0	7.12068e-05	0.00237	0.02897	0.13144	0.22174	0.13543	0.05099	0.17008	0.29809	0.0786	-0.21231	-0.15266	-0.01159	0.00473	-0.00425	-0.00167	7.05255e-05	0.00317	0.01846	0.03423	-0.07165	-0.36782	-0.52671	-0.37678	-0.23103	-0.04693	0.17527	0.17337	0.06149	0.00947	-0.000424433	-0.00179	-0.00108	-0.000223273	-7.07526e-06	2.2953e-06	2.37141e-07	7.02772e-09	3.40619e-09	4.14448e-08	5.34094e-05	0.00184	0.02391	0.12577	0.28948	0.3003	0.0997	-0.06889
0.17823	0	7.42682e-05	0.00247	0.03022	0.13721	0.23157	0.14057	0.04991	0.17024	0.29988	0.07698	-0.21566	-0.15419	-0.01116	0.00599	-0.00347	-0.00149	9.76079e-05	0.00325	0.01861	0.03336	-0.07522	-0.37285	-0.53121	-0.38191	-0.23479	-0.04502	0.17736	0.17021	0.05829	0.00871	-0.000270991	-0.00142	-0.000866603	-0.000183057	-8.77427e-06	1.12983e-06	1.32281e-07	3.98125e-09	5.37206e-10	6.53813e-09	5.275e-05	0.00182	0.02375	0.12544	0.29062	0.30358	0.1011	-0.07072
0.17847	0	7.7241e-05	0.00257	0.03144	0.14281	0.24102	0.1452	0.04835	0.17015	0.30155	0.07526	-0.21899	-0.15574	-0.0109	0.0071	-0.00274	-0.00132	0.000125417	0.00333	0.01875	0.03266	-0.07818	-0.37705	-0.53524	-0.38691	-0.23831	-0.04285	0.17944	0.16698	0.05509	0.00794	-0.000151904	-0.00112	-0.000682378	-0.000147	-8.87696e-06	4.43626e-07	6.75624e-08	2.04209e-09	6.2195e-11	7.57691e-10	5.22665e-05	0.00181	0.0236	0.1251	0.29143	0.30614	0.10202	-0.07247
0.17871	0	8.01044e-05	0.00266	0.03262	0.14818	0.25002	0.14926	0.04625	0.1698	0.30306	0.07338	-0.22234	-0.15732	-0.01079	0.00805	-0.00208	-0.00117	0.00015422	0.0034	0.01888	0.0321	-0.08053	-0.3804	-0.53877	-0.39175	-0.24156	-0.04042	0.18148	0.16372	0.05193	0.00719	-6.27034e-05	-0.000860804	-0.000527772	-0.000115393	-8.03539e-06	7.79131e-08	3.04317e-08	9.19515e-10	1.84282e-11	2.24501e-10	5.18475e-05	0.00179	0.02347	0.12473	0.29186	0.30791	0.10247	-0.0741
0.17895	0	8.28381e-05	0.00275	0.03374	0.1533	0.25849	0.15269	0.0436	0.16914	0.30438	0.07131	-0.22574	-0.15895	-0.01086	0.00885	-0.00148	-0.00102	0.000184086	0.00347	0.01899	0.03168	-0.08227	-0.38285	-0.54176	-0.39643	-0.24454	-0.03778	0.18346	0.16042	0.04881	0.00644	4.32025e-07	-0.000650441	-0.000399819	-8.82712e-05	-6.67526e-06	-7.42842e-08	1.20841e-08	3.64978e-10	2.30352e-12	2.80626e-11	5.14653e-05	0.00178	0.02334	0.1243	0.29188	0.30885	0.10245	-0.07553
0.17919	0	8.54216e-05	0.00284	0.0348	0.15812	0.26636	0.15542	0.04036	0.16816	0.30548	0.06903	-0.22923	-0.16066	-0.01109	0.0095	-0.00093641	-0.000886958	0.000215036	0.00353	0.01906	0.03137	-0.0834	-0.38437	-0.54418	-0.40092	-0.24726	-0.03493	0.18537	0.15711	0.04575	0.00571	4.11637e-05	-0.000480074	-0.000295649	-6.56061e-05	-5.16568e-06	-1.06991e-07	4.65157e-09	1.40465e-10	0	0	5.1113e-05	0.00177	0.02321	0.12381	0.29143	0.30894	0.10199	-0.07669
0.17944	-1.49224e-10	8.78346e-05	0.00292	0.03578	0.16261	0.27355	0.1574	0.0365	0.16684	0.30634	0.06651	-0.23283	-0.16246	-0.01149	0.01001	-0.000450892	-0.000760938	0.000247186	0.00358	0.01909	0.03115	-0.08395	-0.38495	-0.546	-0.40522	-0.24971	-0.03192	0.18716	0.1538	0.04277	0.005	6.30267e-05	-0.00034452	-0.00021244	-4.72921e-05	-3.81547e-06	-1.00378e-07	1.40871e-09	4.25392e-11	0	0	5.07844e-05	0.00176	0.02308	0.12324	0.29049	0.30813	0.10113	-0.07753
0.17968	-1.19379e-09	9.00556e-05	0.00299	0.03669	0.16672	0.28001	0.15858	0.032	0.16518	0.30695	0.06375	-0.23656	-0.16437	-0.01206	0.01038	-2.15157e-05	-0.000644253	0.000281034	0.00361	0.01905	0.03098	-0.08391	-0.38455	-0.5472	-0.4093	-0.25189	-0.02875	0.18884	0.15049	0.03988	0.00432	6.90516e-05	-0.000239293	-0.000147581	-3.29142e-05	-2.69231e-06	-7.91913e-08	2.00245e-10	6.04688e-12	0	0	5.04751e-05	0.00175	0.02294	0.12257	0.28904	0.30644	0.09989	-0.07796
0.17992	-4.02905e-09	9.20632e-05	0.00306	0.03752	0.17043	0.28567	0.15892	0.02687	0.16315	0.3073	0.06076	-0.24042	-0.16638	-0.01279	0.01061	0.00035317	-0.000536567	0.000317169	0.00363	0.01895	0.03085	-0.08331	-0.38318	-0.54774	-0.41314	-0.25378	-0.02546	0.19038	0.1472	0.0371	0.00366	6.21429e-05	-0.000160085	-9.85108e-05	-2.19797e-05	-1.80357e-06	-5.4321e-08	1.34829e-11	4.07149e-13	0	0	5.01812e-05	0.00174	0.02281	0.12181	0.28705	0.30384	0.09832	-0.07793
0.18016	-1.44844e-08	9.38145e-05	0.00312	0.03825	0.17371	0.29048	0.15839	0.02108	0.16078	0.30739	0.05752	-0.24444	-0.16852	-0.01368	0.0107	0.000674548	-0.000437528	0.000356372	0.00364	0.01877	0.03074	-0.08218	-0.38082	-0.54759	-0.41672	-0.25539	-0.02206	0.19175	0.14393	0.03443	0.00304	4.51522e-05	-0.000102649	-6.26993e-05	-1.39898e-05	-1.14816e-06	-3.46295e-08	3.99494e-12	1.20637e-13	0	0	4.98995e-05	0.00173	0.02266	0.12093	0.28453	0.30035	0.09646	-0.07737
0.18041	-5.81258e-08	9.51817e-05	0.00317	0.03888	0.17652	0.2944	0.15695	0.01466	0.15806	0.30725	0.05407	-0.2486	-0.17077	-0.01472	0.01068	0.000943726	-0.00034673	0.000400173	0.00364	0.01851	0.03061	-0.08053	-0.37746	-0.54674	-0.42003	-0.25669	-0.01858	0.19295	0.1407	0.03189	0.00245	2.0721e-05	-6.29916e-05	-3.77367e-05	-8.42016e-06	-6.91145e-07	-2.08655e-08	4.99367e-13	1.50796e-14	0	0	4.96286e-05	0.00172	0.02251	0.11995	0.28146	0.296	0.09435	-0.07623
0.18065	-1.65453e-07	9.60154e-05	0.00322	0.03941	0.17885	0.29738	0.15459	0.0076	0.15501	0.30688	0.05044	-0.2529	-0.17314	-0.0159	0.01053	0.00116	-0.000263752	0.00045029	0.00362	0.01816	0.03045	-0.0784	-0.3731	-0.54515	-0.42302	-0.25769	-0.01501	0.19396	0.13751	0.02948	0.0019	-8.56219e-06	-3.71841e-05	-2.12437e-05	-4.74012e-06	-3.89093e-07	-1.17496e-08	0	0	0	0	4.9368e-05	0.00171	0.02236	0.11886	0.27787	0.2908	0.09204	-0.07446
0.18089	-3.84557e-07	9.6089e-05	0.00325	0.03984	0.18068	0.2994	0.15131	-6.77234e-05	0.15165	0.30631	0.04664	-0.25731	-0.17563	-0.01722	0.01026	0.00133	-0.00018818	0.000508415	0.0036	0.01771	0.03023	-0.07581	-0.36776	-0.54281	-0.42569	-0.25838	-0.01138	0.19478	0.13437	0.02723	0.00139	-4.02528e-05	-2.15089e-05	-1.09695e-05	-2.44763e-06	-2.00913e-07	-6.06706e-09	0	0	0	0	4.91175e-05	0.0017	0.0222	0.11767	0.27378	0.2848	0.08958	-0.07201
0.18113	-8.33894e-07	9.48648e-05	0.00327	0.04015	0.18199	0.30043	0.1471	-0.00832	0.14801	0.30556	0.04273	-0.26182	-0.17822	-0.01865	0.00989	0.00145	-0.000119622	0.000576129	0.00357	0.01716	0.02993	-0.0728	-0.36145	-0.53969	-0.428	-0.25874	-0.00769	0.19539	0.13129	0.02512	0.00092175	-7.24829e-05	-1.30986e-05	-5.17716e-06	-1.15518e-06	-9.48229e-08	-2.8634e-09	0	0	0	0	4.88793e-05	0.00169	0.02203	0.11639	0.2692	0.27806	0.08703	-0.06884
0.18138	-1.64951e-06	9.17277e-05	0.00328	0.04035	0.18277	0.30047	0.14198	-0.01711	0.14412	0.30467	0.03874	-0.2664	-0.1809	-0.02021	0.00941	0.00152	-5.76917e-05	0.000654986	0.00354	0.01651	0.02953	-0.0694	-0.35418	-0.53578	-0.42994	-0.25877	-0.00395	0.19581	0.12827	0.02317	0.000501	-0.000103529	-9.29795e-06	-2.2584e-06	-5.03917e-07	-4.13641e-08	-1.24909e-09	0	0	0	0	4.8656e-05	0.00168	0.02186	0.11502	0.2642	0.27064	0.08445	-0.06492
0.18162	-2.98388e-06	8.59902e-05	0.00328	0.04043	0.18302	0.29951	0.13596	-0.02641	0.14001	0.30368	0.03473	-0.27102	-0.18366	-0.02186	0.00884	0.00154	-1.98689e-06	0.000746433	0.0035	0.01574	0.02901	-0.06566	-0.34597	-0.53107	-0.43148	-0.25844	-0.000160415	0.19603	0.12533	0.02139	0.000126745	-0.000131885	-7.78212e-06	-8.04899e-07	-1.79597e-07	-1.47422e-08	-4.45177e-10	0	0	0	0	4.84508e-05	0.00167	0.02169	0.11359	0.2588	0.26262	0.08188	-0.06022
0.18186	-5.05523e-06	7.66752e-05	0.00326	0.0404	0.18274	0.29756	0.12909	-0.03617	0.13572	0.30263	0.03075	-0.27563	-0.18648	-0.0236	0.00818	0.00152	4.79645e-05	0.000851499	0.00347	0.01486	0.02836	-0.06159	-0.33686	-0.52555	-0.43261	-0.25777	0.00368	0.19605	0.12248	0.01978	-0.000200518	-0.00015692	-7.54746e-06	-2.08261e-07	-4.64694e-08	-3.81444e-09	-1.15186e-10	0	0	0	0	4.82679e-05	0.00166	0.02152	0.11211	0.25308	0.25407	0.0794	-0.05473
0.1821	-8.09818e-06	6.27336e-05	0.00323	0.04024	0.18193	0.29464	0.1214	-0.04631	0.13131	0.30156	0.02686	-0.28021	-0.18935	-0.02543	0.00744	0.00146	9.26516e-05	0.000971107	0.00343	0.01388	0.02756	-0.05725	-0.32688	-0.51923	-0.4333	-0.25672	0.00758	0.19589	0.11972	0.01833	-0.000480542	-0.000178222	-7.92065e-06	-6.00831e-08	-1.34064e-08	-1.10046e-09	-3.3231e-11	0	0	0	0	4.8112e-05	0.00165	0.02136	0.11059	0.24709	0.2451	0.07704	-0.04844
0.18235	-1.23465e-05	4.31214e-05	0.00318	0.03998	0.18061	0.29077	0.11294	-0.05679	0.12681	0.30052	0.0231	-0.2847	-0.19224	-0.02731	0.00662	0.00136	0.000132831	0.00111	0.00339	0.01279	0.0266	-0.05267	-0.31607	-0.51209	-0.43353	-0.2553	0.01154	0.19556	0.11705	0.01705	-0.000713311	-0.00019546	-8.33747e-06	-1.78024e-08	-3.97225e-09	-3.26062e-10	-9.84623e-12	0	0	0	0	4.7988e-05	0.00165	0.0212	0.10907	0.24089	0.23579	0.07488	-0.04135
0.18259	-1.80305e-05	1.68155e-05	0.00311	0.0396	0.17879	0.286	0.10378	-0.06753	0.12229	0.29955	0.01955	-0.28906	-0.19514	-0.02926	0.00573	0.00122	0.000170326	0.00126	0.00337	0.0116	0.02549	-0.04788	-0.30448	-0.50417	-0.4333	-0.25349	0.01557	0.19508	0.11449	0.01594	-0.000899709	-0.000208644	-8.67025e-06	-2.2253e-09	-4.96532e-10	-4.07578e-11	-1.23078e-12	0	0	0	0	4.79007e-05	0.00164	0.02106	0.10755	0.23457	0.22625	0.07295	-0.03346
0.18283	-2.53797e-05	-1.72017e-05	0.00302	0.03911	0.17649	0.28038	0.09399	-0.07845	0.11779	0.2987	0.01626	-0.29325	-0.19802	-0.03125	0.00477	0.00104	0.00020723	0.00143	0.00335	0.01032	0.02424	-0.04291	-0.29216	-0.49548	-0.43259	-0.25128	0.01969	0.19445	0.11204	0.015	-0.00104	-0.000217868	-8.90046e-06	0	0	0	0	0	0	0	0	4.78552e-05	0.00163	0.02092	0.10607	0.22819	0.21659	0.07131	-0.0248
0.18307	-3.46241e-05	-5.99498e-05	0.00291	0.03851	0.17374	0.27395	0.08363	-0.08947	0.11336	0.29802	0.01327	-0.29722	-0.20086	-0.03328	0.00376	0.000832005	0.000246063	0.00163	0.00335	0.00896	0.02283	-0.0378	-0.27918	-0.48605	-0.43139	-0.24866	0.0239	0.1937	0.1097	0.01421	-0.00114	-0.000223243	-9.01377e-06	0	0	0	0	0	-2.09209e-13	-6.92804e-12	-8.44008e-11	4.78558e-05	0.00163	0.02081	0.10464	0.22183	0.2069	0.06999	-0.01539
0.18332	-4.59969e-05	-0.000112456	0.00277	0.03781	0.17057	0.26679	0.0728	-0.10052	0.10906	0.29755	0.01065	-0.30094	-0.20365	-0.03534	0.0027	0.000594669	0.000291071	0.00185	0.00337	0.00753	0.02129	-0.03257	-0.26559	-0.4759	-0.4297	-0.24563	0.02822	0.19285	0.10748	0.01358	-0.00119	-0.000224958	-9.0126e-06	0	0	0	0	0	-1.67367e-12	-5.54243e-11	-6.75207e-10	4.79043e-05	0.00163	0.02071	0.10329	0.21555	0.19728	0.06903	-0.00527
0.18356	-5.97319e-05	-0.00017575	0.00261	0.03702	0.16702	0.25897	0.06159	-0.1115	0.10494	0.29732	0.00843	-0.30435	-0.20636	-0.03742	0.00159	0.000331498	0.000346925	0.00211	0.00342	0.00606	0.01964	-0.02725	-0.25146	-0.46509	-0.42752	-0.24217	0.03266	0.19191	0.10536	0.0131	-0.00121	-0.000223221	-8.90358e-06	0	0	0	0	0	-5.64864e-12	-1.87057e-10	-2.27882e-09	4.80018e-05	0.00163	0.02063	0.10203	0.20944	0.18784	0.06846	0.00552
0.1838	-7.60909e-05	-0.000250984	0.00243	0.03615	0.16312	0.25058	0.0501	-0.12234	0.10105	0.29737	0.00666	-0.30744	-0.20899	-0.03952	0.000426321	4.53413e-05	0.000418312	0.0024	0.00351	0.00456	0.01789	-0.02187	-0.23687	-0.45364	-0.42483	-0.23829	0.03724	0.19091	0.10336	0.01276	-0.00119	-0.000218254	-8.69371e-06	-2.89487e-13	-3.52667e-12	-1.58054e-11	-2.60588e-11	-1.58054e-11	-3.10923e-11	-9.13139e-10	-1.11208e-08	4.81234e-05	0.00163	0.02058	0.10089	0.20356	0.17867	0.06829	0.01691
0.18404	-9.54481e-05	-0.000339813	0.00221	0.0352	0.15893	0.24169	0.03841	-0.13294	0.09743	0.29772	0.00536	-0.31016	-0.21152	-0.04164	-0.000782142	-0.00026205	0.000509964	0.00274	0.00364	0.00305	0.01608	-0.01643	-0.22188	-0.44161	-0.42166	-0.23398	0.04195	0.18985	0.10147	0.01254	-0.00113	-0.000210327	-8.39161e-06	-2.31589e-12	-2.82134e-11	-1.26443e-10	-2.0847e-10	-1.26443e-10	-1.67775e-10	-4.62396e-09	-5.63032e-08	4.81392e-05	0.00163	0.02055	0.09987	0.19796	0.16984	0.06853	0.02885
0.18429	-0.000118206	-0.000444012	0.00197	0.03417	0.15449	0.23241	0.02664	-0.14323	0.09413	0.29839	0.00456	-0.31249	-0.21394	-0.04377	-0.00204	-0.000589197	0.000626622	0.00312	0.00383	0.00156	0.01422	-0.01097	-0.20656	-0.42905	-0.41799	-0.22925	0.04681	0.18876	0.09968	0.01244	-0.00105	-0.000199727	-8.00628e-06	-7.81614e-12	-9.52201e-11	-4.26747e-10	-7.03586e-10	-4.26747e-10	-5.2317e-10	-1.41796e-08	-1.72647e-07	4.78933e-05	0.00164	0.02055	0.099	0.1927	0.16144	0.06919	0.04126
0.18453	-0.000144814	-0.000565571	0.0017	0.03309	0.14985	0.22283	0.01489	-0.15312	0.09118	0.29939	0.00427	-0.31442	-0.21623	-0.04592	-0.00334	-0.000934984	0.000772676	0.00356	0.00409	0.000108171	0.01237	-0.00548	-0.19098	-0.41601	-0.41384	-0.22408	0.05182	0.18765	0.09799	0.01245	-0.000932675	-0.000186754	-7.54715e-06	-1.27116e-10	-1.54859e-09	-6.94031e-09	-1.14426e-08	-6.94031e-09	-2.6166e-09	-3.54946e-08	-4.30869e-07	4.70682e-05	0.00164	0.02057	0.09828	0.18784	0.15355	0.07025	0.05405
0.18477	-0.000175912	-0.000707325	0.00139	0.03196	0.14506	0.21306	0.00325	-0.16254	0.0886	0.30074	0.00451	-0.31593	-0.21841	-0.04809	-0.0047	-0.0013	0.000951099	0.00405	0.00441	-0.00128	0.01054	2.37833e-05	-0.17522	-0.40256	-0.40921	-0.21849	0.05698	0.18652	0.09639	0.01255	-0.000795686	-0.000171765	-7.02541e-06	-9.04898e-10	-1.10239e-08	-4.94058e-08	-8.14563e-08	-4.94058e-08	-1.36148e-08	-8.67027e-08	-1.04526e-06	4.47004e-05	0.00165	0.02062	0.09771	0.1834	0.1462	0.0717	0.06715
0.18501	-0.00021219	-0.000872322	0.00104	0.03078	0.14017	0.20319	-0.00816	-0.17142	0.08643	0.30241	0.00526	-0.31701	-0.22046	-0.05028	-0.00612	-0.00168	0.00116	0.0046	0.00481	-0.00258	0.0088	0.00554	-0.15936	-0.38875	-0.40411	-0.21249	0.06228	0.18539	0.09485	0.01272	-0.00063959	-0.00015513	-6.4527e-06	-2.99443e-09	-3.64797e-08	-1.63491e-07	-2.6955e-07	-1.63491e-07	-4.20963e-08	-1.88992e-07	-2.266e-06	3.96647e-05	0.00165	0.02069	0.0973	0.17942	0.13944	0.07352	0.08046
0.18526	-0.000254358	-0.00106	0.000645569	0.02957	0.13525	0.19333	-0.01926	-0.17969	0.08469	0.30442	0.00651	-0.31767	-0.22238	-0.05249	-0.00759	-0.00209	0.00142	0.00522	0.0053	-0.00376	0.00717	0.01107	-0.14346	-0.37465	-0.39856	-0.20608	0.06774	0.18425	0.09338	0.01295	-0.000468793	-0.000137233	-5.84102e-06	-7.57806e-09	-9.23197e-08	-4.13748e-07	-6.82156e-07	-4.13748e-07	-1.03251e-07	-3.69571e-07	-4.41021e-06	3.05357e-05	0.00165	0.02079	0.09705	0.17591	0.13332	0.07566	0.09389
0.1855	-0.000303224	-0.00129	0.0002036	0.02833	0.13034	0.18357	-0.02994	-0.18729	0.08339	0.30673	0.00826	-0.3179	-0.22417	-0.05474	-0.00912	-0.00252	0.00171	0.0059	0.00588	-0.00479	0.00571	0.01661	-0.1276	-0.36032	-0.39259	-0.19928	0.07332	0.18312	0.09194	0.01322	-0.000288321	-0.000118508	-5.20392e-06	-1.79544e-08	-2.1873e-07	-9.80278e-07	-1.6162e-06	-9.80278e-07	-2.38713e-07	-6.79731e-07	-8.06264e-06	1.46861e-05	0.00164	0.02089	0.09695	0.17289	0.12785	0.0781	0.10733
0.18574	-0.000359621	-0.00154	-0.000291931	0.02708	0.1255	0.17403	-0.04011	-0.19416	0.08253	0.30933	0.01046	-0.31772	-0.22585	-0.05702	-0.01073	-0.00297	0.00204	0.00665	0.00656	-0.00565	0.00447	0.02216	-0.11186	-0.34585	-0.38619	-0.1921	0.07902	0.18198	0.09052	0.0135	-0.000103351	-9.94007e-05	-4.55537e-06	-3.79512e-08	-4.6234e-07	-2.07206e-06	-3.41626e-06	-2.07206e-06	-4.9673e-07	-1.17678e-06	-1.3875e-05	-1.08115e-05	0.00161	0.02101	0.097	0.17036	0.12304	0.08079	0.12069
0.18598	-0.000424376	-0.00183	-0.000845969	0.02582	0.12079	0.16479	-0.04969	-0.20026	0.08213	0.31219	0.0131	-0.31714	-0.2274	-0.05934	-0.0124	-0.00344	0.00242	0.00747	0.00734	-0.00631	0.00348	0.02774	-0.09631	-0.33131	-0.37941	-0.18458	0.08482	0.18082	0.08908	0.01378	8.09063e-05	-8.03459e-05	-3.90631e-06	-7.12079e-08	-8.70565e-07	-3.90164e-06	-6.43271e-06	-3.90164e-06	-9.26389e-07	-1.91986e-06	-2.25202e-05	-4.89804e-05	0.00156	0.02114	0.09717	0.16831	0.11888	0.08366	0.13385
0.18623	-0.000498304	-0.00217	-0.00146	0.02457	0.11626	0.15596	-0.0586	-0.20555	0.08217	0.31528	0.01613	-0.31619	-0.22886	-0.0617	-0.01416	-0.00395	0.00284	0.00836	0.00822	-0.00674	0.00281	0.03333	-0.08102	-0.31675	-0.37227	-0.17673	0.09069	0.17964	0.08762	0.01404	0.000259117	-6.17388e-05	-3.25578e-06	-1.20611e-07	-1.49395e-06	-6.69569e-06	-1.10393e-05	-6.69569e-06	-1.58015e-06	-2.97534e-06	-3.47568e-05	-0.000103227	0.00149	0.02126	0.09747	0.16672	0.11538	0.08667	0.14672
0.18647	-0.000582217	-0.00254	-0.00215	0.02332	0.11196	0.14762	-0.06677	-0.21	0.08264	0.31855	0.0195	-0.31489	-0.23021	-0.06412	-0.01599	-0.00447	0.00332	0.00933	0.00922	-0.00692	0.00249	0.03896	-0.06605	-0.30226	-0.36479	-0.16859	0.09659	0.1784	0.08608	0.01425	0.000425915	-4.39639e-05	-2.59982e-06	-1.8886e-07	-2.38382e-06	-1.06845e-05	-1.76157e-05	-1.06845e-05	-2.51133e-06	-4.41145e-06	-5.13642e-05	-0.000177053	0.00138	0.02137	0.09787	0.16557	0.11249	0.08976	0.15919
0.18671	-0.000676938	-0.00297	-0.00291	0.0221	0.10794	0.13986	-0.07412	-0.21358	0.08353	0.32197	0.02318	-0.31327	-0.23149	-0.06659	-0.01791	-0.00502	0.00387	0.01038	0.01034	-0.00682	0.00258	0.04463	-0.05148	-0.28791	-0.357	-0.16019	0.1025	0.1771	0.08445	0.01439	0.000576237	-2.72628e-05	-1.9039e-06	-2.75642e-07	-3.58502e-06	-1.60695e-05	-2.6494e-05	-1.60692e-05	-3.76635e-06	-6.29277e-06	-7.30872e-05	-0.000273804	0.00124	0.02146	0.09835	0.16484	0.1102	0.09286	0.17118
0.18695	-0.000783334	-0.00345	-0.00375	0.02091	0.10425	0.13276	-0.0806	-0.21628	0.08482	0.32549	0.02711	-0.31137	-0.2327	-0.06914	-0.01992	-0.00559	0.00448	0.01151	0.01157	-0.00642	0.00311	0.05034	-0.03735	-0.27375	-0.34893	-0.15157	0.10835	0.17569	0.08269	0.01444	0.00070623	-1.13033e-05	-1.0113e-06	-3.68609e-07	-5.11642e-06	-2.29371e-05	-3.78166e-05	-2.29354e-05	-5.36414e-06	-8.66944e-06	-0.000100531	-0.00039619	0.00106	0.02153	0.0989	0.16449	0.10846	0.0959	0.18257
0.1872	-0.000902285	-0.00399	-0.00468	0.01974	0.10092	0.1264	-0.08616	-0.21811	0.08647	0.32907	0.03124	-0.3092	-0.23386	-0.07175	-0.02203	-0.00618	0.00517	0.01272	0.01292	-0.00569	0.00412	0.05611	-0.02373	-0.25985	-0.34062	-0.14277	0.11412	0.17415	0.08077	0.01438	0.000812343	4.38968e-06	2.65321e-07	-4.524e-07	-6.99043e-06	-3.13452e-05	-5.16784e-05	-3.13392e-05	-7.31675e-06	-1.1588e-05	-0.000134264	-0.000546766	0.00082625	0.02157	0.0995	0.16448	0.10723	0.09883	0.19329
0.18744	-0.00103	-0.00459	-0.0057	0.01862	0.09802	0.12085	-0.09076	-0.21905	0.08845	0.33265	0.03552	-0.30682	-0.23498	-0.07445	-0.02423	-0.00678	0.00595	0.01403	0.01439	-0.00463	0.00566	0.06195	-0.01065	-0.24626	-0.33209	-0.13383	0.11975	0.17245	0.07866	0.01419	0.000891641	2.05644e-05	2.16563e-06	-5.08942e-07	-9.22307e-06	-4.13672e-05	-6.81928e-05	-4.13152e-05	-9.57645e-06	-1.50565e-05	-0.000174846	-0.000728071	0.000543649	0.02158	0.10011	0.16475	0.10646	0.10158	0.20326
0.18768	-0.00118	-0.00525	-0.00682	0.01754	0.09555	0.11616	-0.09437	-0.21914	0.09073	0.33619	0.03989	-0.30424	-0.23608	-0.07724	-0.02653	-0.0074	0.00683	0.01543	0.01598	-0.00321	0.00775	0.06787	0.00184	-0.23303	-0.32337	-0.12481	0.1252	0.17056	0.07632	0.01386	0.000943659	3.9061e-05	5.13882e-06	-5.09304e-07	-1.1845e-05	-5.31393e-05	-8.75469e-05	-5.28092e-05	-1.18564e-05	-1.89294e-05	-0.000222788	-0.00094258	0.000205733	0.02154	0.10073	0.16527	0.10609	0.1041	0.21239
0.18792	-0.00134	-0.00599	-0.00805	0.01651	0.09357	0.11237	-0.09697	-0.21839	0.09324	0.33962	0.04431	-0.30152	-0.23718	-0.08012	-0.02893	-0.00802	0.00782	0.01692	0.01767	-0.00143	0.01043	0.07387	0.01372	-0.22021	-0.3145	-0.11573	0.13041	0.16844	0.07374	0.01336	0.00096855	6.19926e-05	9.68646e-06	-4.2184e-07	-1.48905e-05	-6.68133e-05	-0.000109946	-6.57453e-05	-1.381e-05	-2.30228e-05	-0.000278591	-0.00119	-0.000191636	0.02146	0.10133	0.16597	0.10605	0.10633	0.22062
0.18817	-0.00152	-0.00681	-0.00939	0.01553	0.09209	0.10953	-0.09856	-0.21684	0.09595	0.34289	0.04871	-0.29867	-0.23828	-0.08309	-0.03144	-0.00864	0.00893	0.01851	0.01947	0.000713039	0.0137	0.07996	0.02493	-0.20785	-0.30551	-0.10666	0.13533	0.16607	0.07088	0.01269	0.000966773	9.14305e-05	1.62298e-05	-2.39497e-07	-1.84314e-05	-8.26991e-05	-0.000135832	-8.00794e-05	-1.49154e-05	-2.70328e-05	-0.000342791	-0.00148	-0.000653081	0.02132	0.10188	0.1668	0.10629	0.10822	0.22789
0.18841	-0.00172	-0.0077	-0.01086	0.01459	0.09113	0.10766	-0.09914	-0.21453	0.09881	0.34595	0.05305	-0.29574	-0.23941	-0.08617	-0.03405	-0.00926	0.01016	0.02019	0.02137	0.00323	0.01759	0.08615	0.03548	-0.19597	-0.29643	-0.09764	0.13993	0.16341	0.06773	0.01184	0.000940018	0.000129279	2.48689e-05	-5.35998e-08	-2.26895e-05	-0.000101737	-0.000166587	-9.58954e-05	-1.39498e-05	-3.01755e-05	-0.000416065	-0.00181	-0.00119	0.02113	0.10236	0.16771	0.10673	0.10972	0.23415
0.18865	-0.00193	-0.00868	-0.01245	0.01372	0.09072	0.10679	-0.09873	-0.21151	0.10174	0.34874	0.05727	-0.29277	-0.24056	-0.08934	-0.03677	-0.00988	0.01153	0.02198	0.02336	0.00611	0.0221	0.09244	0.04533	-0.18462	-0.2873	-0.0887	0.14416	0.16044	0.06425	0.0108	0.000890283	0.0001774	3.56235e-05	1.99321e-08	-2.79245e-05	-0.000125026	-0.000203827	-0.000113309	-9.51484e-06	-3.15469e-05	-0.000499126	-0.00219	-0.00179	0.02086	0.10275	0.16862	0.10731	0.11079	0.23937
0.18889	-0.00217	-0.00975	-0.01417	0.0129	0.09086	0.10691	-0.09734	-0.20785	0.10469	0.35122	0.06132	-0.28977	-0.24176	-0.09262	-0.0396	-0.0105	0.01304	0.02386	0.02543	0.00936	0.02723	0.09883	0.05447	-0.1738	-0.27813	-0.07991	0.14798	0.15715	0.06045	0.00955	0.000819272	0.000237124	4.82474e-05	-1.90604e-07	-3.44202e-05	-0.000153755	-0.000249305	-0.000132455	-1.11381e-07	-3.01689e-05	-0.000592707	-0.00262	-0.00249	0.02052	0.10302	0.16948	0.10796	0.1114	0.2435
0.18914	-0.00242	-0.0109	-0.01603	0.01214	0.09157	0.10803	-0.09501	-0.20359	0.10761	0.35332	0.06517	-0.28678	-0.24301	-0.09599	-0.04253	-0.0111	0.0147	0.02583	0.02757	0.01295	0.03296	0.10531	0.06291	-0.16354	-0.26897	-0.07128	0.15136	0.1535	0.05631	0.0081	0.000727506	0.000307651	6.14308e-05	-1.08005e-06	-4.25588e-05	-0.000189472	-0.000305312	-0.000153543	1.61645e-05	-2.47661e-05	-0.000697615	-0.0031	-0.00328	0.0201	0.10315	0.17023	0.10862	0.11153	0.24655
0.18938	-0.0027	-0.01215	-0.01802	0.01145	0.09284	0.11014	-0.09178	-0.19882	0.11042	0.355	0.06876	-0.28383	-0.2443	-0.09945	-0.04556	-0.01169	0.01653	0.02791	0.02977	0.01687	0.03929	0.11189	0.07065	-0.15385	-0.25983	-0.06288	0.15427	0.1495	0.05181	0.00645	0.000615214	0.000387648	7.35978e-05	-3.09904e-06	-5.27471e-05	-0.000233818	-0.000374276	-0.000176798	4.1318e-05	-1.39891e-05	-0.000814677	-0.00365	-0.00417	0.01958	0.10313	0.17083	0.10923	0.11115	0.24849
0.18962	-0.00299	-0.0135	-0.02015	0.01082	0.09468	0.11322	-0.0877	-0.1936	0.11308	0.35623	0.07206	-0.28094	-0.24565	-0.103	-0.04869	-0.01227	0.01852	0.03008	0.03202	0.02112	0.04618	0.11856	0.0777	-0.14472	-0.25075	-0.05475	0.15667	0.14513	0.04696	0.00459	0.000482551	0.000475514	8.30427e-05	-6.71578e-06	-6.53376e-05	-0.000288258	-0.000458366	-0.000202215	7.75751e-05	3.66615e-06	-0.000944566	-0.00426	-0.00518	0.01896	0.10293	0.17122	0.10974	0.11027	0.24933
0.18986	-0.0033	-0.01493	-0.02242	0.01025	0.09709	0.11725	-0.08282	-0.188	0.11552	0.35696	0.07504	-0.27814	-0.24706	-0.10662	-0.05191	-0.01281	0.02069	0.03235	0.0343	0.02564	0.0536	0.12529	0.08408	-0.13616	-0.24175	-0.04691	0.15855	0.14037	0.04174	0.00252	0.000329395	0.000568575	8.75395e-05	-1.24688e-05	-8.04669e-05	-0.000353556	-0.000558734	-0.00022885	0.000128046	3.03205e-05	-0.00109	-0.00495	-0.00632	0.01823	0.10254	0.17136	0.11009	0.10887	0.24908
0.19011	-0.00364	-0.01646	-0.02483	0.00975	0.10005	0.1222	-0.07721	-0.18211	0.11769	0.35717	0.07767	-0.27544	-0.24852	-0.1103	-0.05522	-0.01334	0.02304	0.0347	0.0366	0.03043	0.06151	0.1321	0.08982	-0.12813	-0.23286	-0.03942	0.15989	0.13523	0.03618	0.000238534	0.000155557	0.000663884	8.4732e-05	-2.09144e-05	-9.8217e-05	-0.000430302	-0.000676273	-0.000255526	0.00019606	6.82491e-05	-0.00124	-0.00572	-0.00759	0.01738	0.10195	0.17122	0.11025	0.10696	0.24777
0.19035	-0.00399	-0.01809	-0.02738	0.00932	0.10355	0.12801	-0.07092	-0.17601	0.11954	0.35683	0.07994	-0.27286	-0.25003	-0.11404	-0.05861	-0.01383	0.02558	0.03715	0.0389	0.03544	0.06987	0.13894	0.09495	-0.12063	-0.22409	-0.0323	0.16065	0.12971	0.03026	-0.00224	-3.84301e-05	0.000758703	7.22689e-05	-3.25779e-05	-0.000118486	-0.000518739	-0.000811601	-0.000280891	0.00028516	0.000119914	-0.00141	-0.00657	-0.009	0.01641	0.10115	0.17075	0.11018	0.10456	0.24542
0.19059	-0.00437	-0.0198	-0.03006	0.00896	0.10757	0.13465	-0.06403	-0.16977	0.12101	0.35593	0.08183	-0.2704	-0.25157	-0.11782	-0.06208	-0.01429	0.0283	0.03968	0.04119	0.04064	0.0786	0.14582	0.09951	-0.11362	-0.21546	-0.02559	0.16085	0.12382	0.024	-0.00491	-0.000249116	0.000851109	4.7818e-05	-4.7862e-05	-0.000140433	-0.000617716	-0.000964215	-0.000302895	0.000399727	0.000188524	-0.00159	-0.0075	-0.01057	0.01531	0.10015	0.16995	0.10985	0.10169	0.24209
0.19083	-0.00476	-0.02161	-0.03287	0.00866	0.1121	0.14205	-0.05663	-0.16348	0.12207	0.35446	0.08333	-0.26808	-0.25315	-0.12162	-0.06562	-0.01472	0.03121	0.04229	0.04345	0.04599	0.08766	0.15269	0.10354	-0.10708	-0.207	-0.01932	0.16045	0.11755	0.01743	-0.00776	-0.000472326	0.000939382	9.05183e-06	-6.71389e-05	-0.000163035	-0.000725734	-0.00113	-0.000319312	0.000544351	0.000277473	-0.00178	-0.00851	-0.0123	0.01408	0.09893	0.16879	0.10924	0.09837	0.2378
0.19108	-0.00517	-0.0235	-0.03581	0.00842	0.11709	0.15016	-0.0488	-0.15723	0.12268	0.35241	0.08444	-0.2659	-0.25474	-0.12544	-0.06924	-0.01513	0.0343	0.04497	0.04567	0.05145	0.09697	0.15955	0.10708	-0.10097	-0.19872	-0.01352	0.15947	0.11093	0.01055	-0.01078	-0.000702936	0.00102	-4.63418e-05	-9.07499e-05	-0.000185099	-0.000841101	-0.00132	-0.000328019	0.000723646	0.000390228	-0.00197	-0.00962	-0.01419	0.01272	0.0975	0.16726	0.10833	0.09463	0.23263
0.19132	-0.00559	-0.02547	-0.03887	0.00825	0.12254	0.15891	-0.04062	-0.15109	0.12279	0.34979	0.08516	-0.26384	-0.25633	-0.12927	-0.07293	-0.01551	0.03756	0.04771	0.04783	0.05696	0.10646	0.16636	0.11019	-0.09525	-0.19064	-0.00821	0.1579	0.10397	0.0034	-0.01394	-0.000932032	0.0011	-0.000120613	-0.000118913	-0.000204762	-0.000961343	-0.00152	-0.000327304	0.000942315	0.000530534	-0.00217	-0.0108	-0.01624	0.01123	0.09587	0.16535	0.10712	0.09051	0.22663
0.19156	-0.00603	-0.02752	-0.04205	0.00814	0.1284	0.16822	-0.03217	-0.14516	0.12239	0.34662	0.0855	-0.26192	-0.2579	-0.13309	-0.0767	-0.01588	0.041	0.05051	0.0499	0.0625	0.11604	0.17309	0.11291	-0.08989	-0.18276	-0.00342	0.15574	0.0967	-0.004	-0.01723	-0.00115	0.00117	-0.000215996	-0.000151816	-0.000219994	-0.00108	-0.00173	-0.00031556	0.00121	0.000702205	-0.00237	-0.01207	-0.01846	0.00961	0.09406	0.16308	0.1056	0.08606	0.21987
0.1918	-0.00649	-0.02964	-0.04533	0.0081	0.13465	0.17803	-0.02356	-0.13949	0.12144	0.34289	0.08548	-0.26011	-0.25943	-0.13688	-0.08054	-0.01623	0.04459	0.05334	0.05189	0.068	0.12565	0.17971	0.11529	-0.08485	-0.17512	0.00084063	0.153	0.08913	-0.0116	-0.02061	-0.00135	0.00124	-0.000334798	-0.000189666	-0.00022877	-0.00121	-0.00196	-0.00029111	0.00152	0.000909213	-0.00257	-0.01342	-0.02084	0.00786	0.09206	0.16043	0.10378	0.08131	0.21242
0.19205	-0.00696	-0.03183	-0.0487	0.00812	0.14125	0.18825	-0.01487	-0.13418	0.11992	0.33864	0.08512	-0.2584	-0.26089	-0.14064	-0.08446	-0.01658	0.04833	0.05621	0.05377	0.07343	0.13519	0.18617	0.11737	-0.08009	-0.16771	0.00455	0.14969	0.08128	-0.01939	-0.02407	-0.00151	0.0013	-0.000479606	-0.000232747	-0.000229097	-0.00133	-0.00221	-0.000252009	0.00188	0.00116	-0.00276	-0.01484	-0.02339	0.006	0.0899	0.15744	0.10166	0.07631	0.20436
0.19229	-0.00744	-0.03407	-0.05216	0.00822	0.14817	0.19881	-0.00618	-0.12929	0.11782	0.33388	0.08443	-0.25678	-0.26227	-0.14435	-0.08845	-0.01693	0.05221	0.0591	0.05553	0.07875	0.14459	0.19244	0.11919	-0.07556	-0.16054	0.00771	0.14581	0.07317	-0.02733	-0.02757	-0.00163	0.00135	-0.000653083	-0.000281363	-0.000218988	-0.00144	-0.00246	-0.000196247	0.00231	0.00145	-0.00294	-0.01633	-0.0261	0.00402	0.08759	0.1541	0.09926	0.07111	0.19577
0.19253	-0.00793	-0.03637	-0.05569	0.00838	0.15538	0.20963	0.00241	-0.12489	0.11513	0.32865	0.08344	-0.25522	-0.26353	-0.148	-0.09253	-0.0173	0.05621	0.062	0.05717	0.0839	0.15376	0.19847	0.12079	-0.07124	-0.15363	0.01029	0.14139	0.06484	-0.03538	-0.0311	-0.00169	0.0014	-0.000858257	-0.000335901	-0.000196364	-0.00155	-0.00274	-0.000121457	0.00281	0.00179	-0.00311	-0.01789	-0.02897	0.00193	0.08515	0.15045	0.09659	0.06576	0.18673
0.19277	-0.00844	-0.03872	-0.05928	0.00863	0.16284	0.22063	0.01082	-0.12103	0.11185	0.32298	0.08218	-0.2537	-0.26465	-0.15156	-0.09669	-0.01768	0.06031	0.0649	0.05867	0.08884	0.1626	0.20421	0.12221	-0.06709	-0.14698	0.0123	0.13642	0.05629	-0.04351	-0.03462	-0.0017	0.00145	-0.0011	-0.000397078	-0.000158784	-0.00164	-0.00302	-2.38602e-05	0.00338	0.00219	-0.00327	-0.01951	-0.03198	-0.000255799	0.0826	0.14652	0.09369	0.06031	0.17733
0.19302	-0.00895	-0.04111	-0.06292	0.00894	0.17051	0.23174	0.01899	-0.11776	0.10798	0.31691	0.08069	-0.2522	-0.2656	-0.15504	-0.10092	-0.01809	0.06452	0.0678	0.06002	0.09354	0.17105	0.20963	0.12348	-0.06308	-0.14061	0.01372	0.13092	0.04754	-0.05169	-0.03812	-0.00163	0.00147	-0.00138	-0.000465691	-0.000103713	-0.00173	-0.00332	0.000100675	0.00404	0.00264	-0.0034	-0.02118	-0.03513	-0.00253	0.07997	0.14234	0.09056	0.05481	0.16766
0.19326	-0.00947	-0.04353	-0.06658	0.00933	0.17835	0.24287	0.02684	-0.11511	0.10356	0.31049	0.079	-0.25068	-0.26634	-0.1584	-0.10523	-0.01852	0.0688	0.07067	0.06121	0.09795	0.17902	0.21466	0.12462	-0.05918	-0.13452	0.01456	0.12491	0.03861	-0.0599	-0.04156	-0.00149	0.00148	-0.00171	-0.000542607	-2.82823e-05	-0.00179	-0.00363	0.000256729	0.00479	0.00317	-0.00351	-0.02289	-0.0384	-0.00488	0.07728	0.13794	0.08725	0.04931	0.1578
0.1935	-0.01001	-0.04597	-0.07027	0.0098	0.18632	0.25395	0.03431	-0.11312	0.09859	0.30378	0.07716	-0.24912	-0.26685	-0.16164	-0.10962	-0.01899	0.07314	0.07352	0.06225	0.10204	0.18642	0.21927	0.12566	-0.05536	-0.12871	0.01481	0.11839	0.02951	-0.0681	-0.04493	-0.00127	0.00146	-0.00209	-0.000628955	7.17156e-05	-0.00183	-0.00394	0.00045066	0.00565	0.00377	-0.00358	-0.02462	-0.04178	-0.00729	0.07455	0.13336	0.08378	0.04384	0.14784
0.19374	-0.01055	-0.04844	-0.07395	0.01034	0.19438	0.26492	0.04134	-0.1118	0.09312	0.29682	0.0752	-0.24749	-0.2671	-0.16473	-0.11407	-0.0195	0.07753	0.07632	0.06313	0.10578	0.1932	0.2234	0.12661	-0.05161	-0.1232	0.01448	0.11138	0.02026	-0.07626	-0.04821	-0.000965252	0.0014	-0.00254	-0.000725934	0.000200823	-0.00183	-0.00426	0.000689275	0.00663	0.00446	-0.00361	-0.02636	-0.04523	-0.00973	0.07183	0.12866	0.08018	0.03845	0.13786
0.19399	-0.01111	-0.05091	-0.07763	0.01095	0.20248	0.27569	0.04789	-0.11116	0.08718	0.28969	0.07318	-0.24574	-0.26706	-0.16767	-0.11859	-0.02006	0.08195	0.07907	0.06383	0.10914	0.19928	0.227	0.12748	-0.0479	-0.11798	0.01356	0.10388	0.01088	-0.08436	-0.05137	-0.000582799	0.0013	-0.00305	-0.000834903	0.000363764	-0.0018	-0.00456	0.000979654	0.00773	0.00524	-0.0036	-0.02809	-0.04875	-0.0122	0.06914	0.12387	0.07649	0.03319	0.12795
0.19423	-0.01168	-0.05339	-0.08128	0.01162	0.21058	0.2862	0.05392	-0.11119	0.08082	0.28242	0.07113	-0.24385	-0.2667	-0.17043	-0.12316	-0.02066	0.08637	0.08175	0.06437	0.1121	0.2046	0.23005	0.12828	-0.04422	-0.11306	0.01207	0.09592	0.00137	-0.09237	-0.05439	-0.000120391	0.00113	-0.00365	-0.000957881	0.000565997	-0.00171	-0.00486	0.00133	0.00897	0.00612	-0.00352	-0.02977	-0.05229	-0.01467	0.06651	0.11904	0.07274	0.02809	0.11818
0.19447	-0.01226	-0.05586	-0.08488	0.01236	0.21864	0.2964	0.05941	-0.11188	0.0741	0.2751	0.0691	-0.24179	-0.26598	-0.173	-0.12777	-0.02131	0.09077	0.08436	0.06475	0.11463	0.20912	0.23248	0.129	-0.04057	-0.10844	0.01001	0.08749	-0.00826	-0.10025	-0.05725	0.000419899	0.000879047	-0.00433	-0.0011	0.000813165	-0.00156	-0.00514	0.00175	0.01037	0.00711	-0.00338	-0.0314	-0.05581	-0.01712	0.06396	0.11423	0.06897	0.02319	0.10863
0.19471	-0.01285	-0.05833	-0.08843	0.01315	0.22661	0.30623	0.06431	-0.11321	0.06707	0.26778	0.06714	-0.23952	-0.2649	-0.17537	-0.13241	-0.02202	0.09514	0.08687	0.06496	0.11673	0.21278	0.23426	0.12966	-0.03693	-0.10412	0.0074	0.07862	-0.01799	-0.10799	-0.05993	0.00103	0.000539609	-0.00511	-0.00125	0.00111	-0.00133	-0.00538	0.00224	0.01194	0.00823	-0.00315	-0.03294	-0.0593	-0.01952	0.06154	0.10946	0.0652	0.01851	0.09938
0.19496	-0.01345	-0.06077	-0.0919	0.014	0.23447	0.31563	0.06864	-0.11514	0.05979	0.26051	0.06529	-0.23701	-0.26341	-0.17752	-0.13708	-0.02277	0.09946	0.08929	0.06501	0.11838	0.21557	0.23537	0.13022	-0.03331	-0.1001	0.00423	0.0693	-0.02781	-0.11555	-0.06242	0.00172	9.12097e-05	-0.00601	-0.00143	0.00147	-0.00101	-0.00559	0.00282	0.01369	0.00947	-0.00282	-0.03435	-0.0627	-0.02185	0.05926	0.1048	0.06148	0.0141	0.09049
0.1952	-0.01406	-0.06319	-0.09529	0.01489	0.24216	0.32458	0.07237	-0.11764	0.05233	0.25336	0.06357	-0.23423	-0.26152	-0.17943	-0.14175	-0.02358	0.1037	0.09159	0.0649	0.11959	0.21744	0.23575	0.13068	-0.0297	-0.09637	0.000527307	0.05954	-0.03773	-0.12292	-0.0647	0.00246	-0.000483363	-0.00702	-0.00164	0.00188	-0.000594979	-0.00575	0.0035	0.01562	0.01086	-0.00239	-0.03561	-0.06598	-0.02408	0.05715	0.10027	0.05783	0.00996	0.08204
0.19544	-0.01469	-0.06557	-0.09859	0.01583	0.24967	0.33303	0.07552	-0.12066	0.04474	0.24636	0.06203	-0.23116	-0.25918	-0.18109	-0.14641	-0.02443	0.10784	0.09377	0.06464	0.12036	0.21839	0.23539	0.13101	-0.02612	-0.09293	-0.0037	0.04935	-0.04774	-0.13009	-0.06676	0.00325	-0.0012	-0.00817	-0.00187	0.00237	-6.352e-05	-0.00585	0.00428	0.01776	0.01239	-0.00184	-0.03668	-0.06909	-0.0262	0.05523	0.09592	0.05428	0.00614	0.07409
0.19568	-0.01533	-0.06792	-0.10177	0.0168	0.25695	0.34095	0.07809	-0.12415	0.03709	0.23958	0.0607	-0.22777	-0.2564	-0.18248	-0.15104	-0.02533	0.11187	0.09583	0.06424	0.12068	0.21841	0.23427	0.13119	-0.02258	-0.08979	-0.00843	0.03873	-0.05785	-0.13703	-0.0686	0.00407	-0.00208	-0.00946	-0.00213	0.00293	0.000598338	-0.00588	0.00516	0.02011	0.01407	-0.00116	-0.03754	-0.072	-0.02818	0.05351	0.09178	0.05086	0.00265	0.06668
0.19593	-0.016	-0.07024	-0.10484	0.0178	0.26397	0.34832	0.08011	-0.12807	0.02944	0.23304	0.0596	-0.22404	-0.25315	-0.1836	-0.1556	-0.02626	0.11578	0.09774	0.0637	0.12057	0.21751	0.23236	0.13118	-0.0191	-0.08693	-0.01365	0.02768	-0.06807	-0.14376	-0.07022	0.00491	-0.00315	-0.0109	-0.00242	0.00357	0.00141	-0.00583	0.00617	0.02269	0.01591	-0.00034605	-0.03815	-0.07465	-0.03	0.05202	0.08788	0.04758	-0.000496971	0.05986
0.19617	-0.01669	-0.07251	-0.10778	0.01881	0.27071	0.35513	0.08159	-0.13234	0.02185	0.22679	0.05876	-0.21995	-0.24943	-0.18442	-0.16009	-0.02722	0.11954	0.0995	0.06303	0.12004	0.21567	0.22965	0.13095	-0.0157	-0.08434	-0.01934	0.0162	-0.07841	-0.15028	-0.07163	0.00574	-0.00441	-0.01251	-0.00275	0.0043	0.00238	-0.00568	0.0073	0.02548	0.0179	0.000621066	-0.03847	-0.07702	-0.03163	0.05075	0.08424	0.04448	-0.00329	0.05368
0.19641	-0.0174	-0.07475	-0.11059	0.01982	0.27713	0.36135	0.08256	-0.13691	0.01438	0.22085	0.05819	-0.21549	-0.24523	-0.18493	-0.16447	-0.02819	0.12316	0.10111	0.06223	0.1191	0.21294	0.22614	0.13046	-0.01239	-0.08202	-0.02549	0.00429	-0.08889	-0.15658	-0.07283	0.00655	-0.0059	-0.01429	-0.00311	0.00514	0.00354	-0.00542	0.00856	0.02851	0.02007	0.00174	-0.0385	-0.07905	-0.03308	0.04972	0.08089	0.04156	-0.00571	0.04816
0.19665	-0.01816	-0.07696	-0.11328	0.02082	0.28321	0.36698	0.08305	-0.1417	0.00708	0.21525	0.0579	-0.21064	-0.24055	-0.18511	-0.1687	-0.02916	0.12661	0.10255	0.06131	0.11777	0.20933	0.22182	0.12967	-0.00922	-0.07995	-0.03205	-0.00804	-0.09952	-0.16268	-0.07384	0.0073	-0.00762	-0.01624	-0.00351	0.00609	0.0049	-0.00503	0.00997	0.03177	0.02239	0.00303	-0.03818	-0.08072	-0.03431	0.04893	0.07783	0.03885	-0.00777	0.04333
0.1969	-0.01895	-0.07914	-0.11583	0.0218	0.28892	0.372	0.0831	-0.14665	1.12417e-05	0.21	0.0579	-0.20541	-0.2354	-0.18496	-0.17275	-0.03011	0.12988	0.10383	0.06027	0.11605	0.20487	0.21671	0.12856	-0.00619	-0.07812	-0.039	-0.0208	-0.11033	-0.1686	-0.07467	0.00798	-0.00961	-0.01837	-0.00395	0.00715	0.00648	-0.00449	0.01152	0.03527	0.02488	0.00448	-0.03752	-0.08199	-0.03531	0.04837	0.07508	0.03635	-0.00945	0.03921
0.19714	-0.01978	-0.08129	-0.11825	0.02274	0.29423	0.37642	0.08275	-0.15169	-0.00678	0.2051	0.05818	-0.1998	-0.22977	-0.18444	-0.17659	-0.03102	0.13297	0.10492	0.0591	0.11398	0.19961	0.21081	0.12707	-0.00334	-0.07652	-0.04633	-0.03399	-0.12133	-0.17435	-0.07533	0.00856	-0.01187	-0.02069	-0.00442	0.00835	0.00832	-0.00378	0.01322	0.039	0.02752	0.00611	-0.03648	-0.08284	-0.03609	0.04804	0.07264	0.03408	-0.01076	0.0358
0.19738	-0.02067	-0.08344	-0.12056	0.02363	0.29913	0.38023	0.08204	-0.15675	-0.01325	0.20056	0.05874	-0.19383	-0.22369	-0.18356	-0.18018	-0.03188	0.13587	0.10583	0.0578	0.11156	0.19359	0.20415	0.12519	-0.000702939	-0.07512	-0.05398	-0.04758	-0.13254	-0.17996	-0.07586	0.00902	-0.01441	-0.0232	-0.00493	0.00968	0.01042	-0.0029	0.01509	0.04297	0.03032	0.0079	-0.03505	-0.08325	-0.03663	0.04792	0.0705	0.03203	-0.0117	0.03311
0.19762	-0.02162	-0.08558	-0.12275	0.02444	0.30358	0.38344	0.08102	-0.16175	-0.01937	0.19637	0.05955	-0.18749	-0.21717	-0.1823	-0.18348	-0.03267	0.13857	0.10654	0.05638	0.10881	0.18686	0.19675	0.12287	0.00171	-0.07391	-0.06194	-0.06159	-0.14399	-0.18544	-0.07626	0.00934	-0.01725	-0.0259	-0.00547	0.01116	0.01281	-0.00181	0.01712	0.04717	0.03328	0.00987	-0.03323	-0.08319	-0.03693	0.04799	0.06867	0.03022	-0.01226	0.03114
0.19787	-0.02263	-0.08774	-0.12485	0.02516	0.30758	0.38604	0.07972	-0.16663	-0.02509	0.1925	0.06059	-0.18083	-0.21024	-0.18064	-0.18645	-0.03337	0.14108	0.10704	0.05482	0.10574	0.17947	0.18865	0.1201	0.00387	-0.07288	-0.07017	-0.076	-0.15568	-0.19082	-0.07656	0.00948	-0.02039	-0.02879	-0.00606	0.01279	0.01551	-0.000493063	0.01933	0.05159	0.03637	0.012	-0.03101	-0.08266	-0.03701	0.04824	0.06712	0.02864	-0.01246	0.02989
0.19811	-0.02372	-0.08992	-0.12686	0.02578	0.31111	0.38807	0.07821	-0.17132	-0.03041	0.18894	0.06183	-0.17386	-0.20291	-0.17858	-0.18905	-0.03395	0.14337	0.10733	0.05311	0.10238	0.17148	0.1799	0.11685	0.00575	-0.07201	-0.07864	-0.0908	-0.16763	-0.19613	-0.07678	0.00945	-0.02384	-0.03187	-0.00669	0.01457	0.01854	0.00106	0.02171	0.05623	0.0396	0.01428	-0.02839	-0.08167	-0.03686	0.04865	0.06584	0.0273	-0.01229	0.02933
0.19835	-0.02489	-0.09215	-0.12881	0.02628	0.31416	0.38952	0.07652	-0.17576	-0.03528	0.18565	0.06323	-0.16663	-0.19523	-0.17612	-0.19126	-0.03441	0.14547	0.10741	0.05125	0.09873	0.16295	0.17054	0.11313	0.00735	-0.07127	-0.08732	-0.10599	-0.17987	-0.20138	-0.07694	0.00921	-0.02759	-0.03513	-0.00736	0.01651	0.02191	0.00288	0.02427	0.06108	0.04295	0.01672	-0.02539	-0.08021	-0.0365	0.04918	0.06481	0.02618	-0.01177	0.02947
0.19859	-0.02616	-0.09444	-0.13071	0.02663	0.31673	0.39043	0.0747	-0.17989	-0.03971	0.18261	0.06477	-0.15916	-0.18721	-0.17323	-0.19302	-0.03472	0.14735	0.10727	0.04922	0.09481	0.15396	0.16063	0.10892	0.00864	-0.07065	-0.09617	-0.12154	-0.1924	-0.20661	-0.07706	0.00876	-0.03165	-0.03857	-0.00809	0.0186	0.02563	0.00496	0.02702	0.06611	0.04641	0.0193	-0.02202	-0.0783	-0.03595	0.0498	0.064	0.0253	-0.0109	0.03027
0.19884	-0.02752	-0.09682	-0.13259	0.02684	0.31882	0.39081	0.0728	-0.18367	-0.04369	0.17976	0.06638	-0.15151	-0.17891	-0.16993	-0.19432	-0.03486	0.14903	0.1069	0.04702	0.09063	0.14455	0.15023	0.10423	0.00962	-0.07014	-0.10515	-0.13743	-0.20522	-0.21185	-0.07717	0.00808	-0.03601	-0.04219	-0.00887	0.02084	0.02972	0.00734	0.02994	0.07132	0.04995	0.022	-0.0183	-0.07596	-0.03522	0.05048	0.06338	0.02463	-0.00969	0.03171
0.19908	-0.029	-0.0993	-0.13447	0.02688	0.32044	0.3907	0.07086	-0.18704	-0.04721	0.17708	0.06804	-0.14371	-0.17035	-0.16621	-0.19513	-0.03483	0.15051	0.1063	0.04464	0.08621	0.13481	0.13942	0.09906	0.01027	-0.06971	-0.11424	-0.15364	-0.21835	-0.21711	-0.07729	0.00716	-0.04067	-0.04597	-0.00972	0.02323	0.03417	0.01002	0.03304	0.07667	0.05356	0.0248	-0.01425	-0.07321	-0.03434	0.0512	0.06294	0.02417	-0.00815	0.03376
0.19932	-0.03059	-0.10191	-0.13638	0.02675	0.3216	0.39013	0.06892	-0.18998	-0.05028	0.17452	0.0697	-0.1358	-0.16157	-0.16206	-0.19541	-0.03461	0.15179	0.10548	0.04208	0.08156	0.12479	0.12825	0.09343	0.01058	-0.06935	-0.12338	-0.17014	-0.23179	-0.22243	-0.07744	0.00599	-0.04559	-0.04991	-0.01064	0.02576	0.039	0.01301	0.03631	0.08216	0.05722	0.02769	-0.00992	-0.07009	-0.03334	0.0519	0.06262	0.02391	-0.00629	0.03637
0.19956	-0.03231	-0.10467	-0.13834	0.02643	0.3223	0.38913	0.06701	-0.19244	-0.05291	0.17204	0.07132	-0.12783	-0.15262	-0.15751	-0.19516	-0.03418	0.15288	0.10444	0.03931	0.07669	0.11457	0.1168	0.08736	0.01056	-0.06905	-0.13254	-0.18689	-0.24554	-0.22784	-0.07765	0.00457	-0.05079	-0.054	-0.01163	0.02843	0.04421	0.01631	0.03975	0.08773	0.06089	0.03064	-0.00534	-0.06664	-0.03225	0.05256	0.06239	0.02383	-0.00413	0.03951
0.19981	-0.03415	-0.10759	-0.14039	0.02592	0.32258	0.38773	0.06519	-0.1944	-0.05511	0.1696	0.07286	-0.11985	-0.14352	-0.15254	-0.19435	-0.03355	0.15379	0.10319	0.03635	0.07161	0.10421	0.10516	0.08087	0.01019	-0.06878	-0.14167	-0.20386	-0.25959	-0.23336	-0.07793	0.0029	-0.05622	-0.05821	-0.01269	0.03121	0.04977	0.01993	0.04333	0.09338	0.06456	0.03362	-0.000545547	-0.06291	-0.03109	0.05314	0.06222	0.02392	-0.00169	0.04313
0.20005	-0.03613	-0.11069	-0.14253	0.0252	0.32244	0.38596	0.06346	-0.19585	-0.0569	0.16715	0.07426	-0.1119	-0.13433	-0.14718	-0.19298	-0.0327	0.15452	0.10173	0.03318	0.06634	0.09377	0.09338	0.07398	0.00947	-0.06854	-0.15074	-0.22099	-0.27394	-0.23901	-0.07831	0.000970738	-0.06187	-0.06254	-0.01385	0.03409	0.05569	0.02386	0.04705	0.09905	0.06819	0.03661	0.00441	-0.05896	-0.0299	0.0536	0.06206	0.02416	0.00101	0.04717
0.20029	-0.03825	-0.114	-0.1448	0.02428	0.3219	0.38387	0.06187	-0.19676	-0.05828	0.16467	0.07551	-0.10403	-0.12508	-0.14143	-0.19104	-0.03163	0.15509	0.10007	0.0298	0.06089	0.08333	0.08156	0.06673	0.00841	-0.06832	-0.15969	-0.23824	-0.28856	-0.24483	-0.0788	-0.0012	-0.06771	-0.06697	-0.01508	0.03706	0.06195	0.0281	0.05089	0.10472	0.07175	0.03958	0.00946	-0.05483	-0.02873	0.0539	0.06189	0.02454	0.00395	0.05156
0.20053	-0.04051	-0.11751	-0.14722	0.02315	0.32099	0.38147	0.06043	-0.19712	-0.05928	0.16212	0.07656	-0.09627	-0.11581	-0.13531	-0.18853	-0.03034	0.15551	0.09822	0.02621	0.05527	0.07293	0.06976	0.05916	0.007	-0.06811	-0.1685	-0.25557	-0.30345	-0.25082	-0.07943	-0.00361	-0.0737	-0.07147	-0.01642	0.04011	0.06853	0.03263	0.05483	0.11034	0.07521	0.0425	0.01457	-0.0506	-0.02761	0.05401	0.06166	0.02504	0.00709	0.05626
0.20078	-0.04291	-0.12124	-0.1498	0.02181	0.31973	0.37881	0.05917	-0.19693	-0.05993	0.15947	0.07739	-0.08869	-0.10657	-0.12884	-0.18545	-0.02882	0.1558	0.0962	0.0224	0.04948	0.06264	0.05806	0.05131	0.00525	-0.06789	-0.17713	-0.27292	-0.31859	-0.25702	-0.08021	-0.00625	-0.07982	-0.07602	-0.01785	0.04319	0.0754	0.03745	0.05885	0.11588	0.07852	0.04534	0.01967	-0.04633	-0.02658	0.0539	0.06134	0.02564	0.01042	0.06118
0.20102	-0.04544	-0.1252	-0.15256	0.02027	0.31814	0.37592	0.05812	-0.1962	-0.06023	0.15669	0.07796	-0.0813	-0.09738	-0.12204	-0.18181	-0.02708	0.15596	0.09401	0.01837	0.04354	0.05249	0.04652	0.04321	0.00318	-0.06768	-0.18554	-0.29025	-0.33394	-0.26342	-0.08115	-0.00909	-0.08601	-0.08059	-0.01938	0.0463	0.08252	0.04254	0.06294	0.1213	0.08166	0.04805	0.0247	-0.04209	-0.02569	0.05353	0.06091	0.02632	0.0139	0.06626
0.20126	-0.0481	-0.12938	-0.1555	0.01852	0.31626	0.37284	0.05728	-0.1949	-0.0602	0.15378	0.07826	-0.07415	-0.08829	-0.11493	-0.17763	-0.02512	0.15603	0.09168	0.01412	0.03745	0.04255	0.03521	0.03492	0.000780556	-0.06746	-0.1937	-0.3075	-0.34949	-0.27005	-0.08226	-0.01213	-0.09223	-0.08516	-0.02102	0.04939	0.08988	0.04788	0.06708	0.12655	0.08458	0.05061	0.02961	-0.03794	-0.02495	0.05288	0.06032	0.02706	0.0175	0.07142
0.2015	-0.05088	-0.13377	-0.15863	0.01657	0.3141	0.36959	0.05669	-0.19306	-0.05988	0.15071	0.07827	-0.06728	-0.07932	-0.10753	-0.17292	-0.02293	0.15601	0.08921	0.00965	0.03121	0.03284	0.02419	0.02647	-0.00193	-0.06725	-0.20159	-0.32461	-0.3652	-0.27691	-0.08356	-0.01532	-0.09845	-0.08971	-0.02277	0.05245	0.09741	0.05344	0.07123	0.1316	0.08726	0.05298	0.03432	-0.03395	-0.02443	0.05194	0.05957	0.02786	0.02119	0.0766
0.20175	-0.05377	-0.13837	-0.16195	0.01445	0.3117	0.36622	0.05636	-0.19068	-0.05926	0.14748	0.07798	-0.06071	-0.07051	-0.09987	-0.1677	-0.02053	0.15594	0.08663	0.00496	0.02484	0.0234	0.01352	0.01793	-0.00493	-0.06705	-0.20917	-0.34153	-0.38102	-0.284	-0.08504	-0.01864	-0.10459	-0.09419	-0.02464	0.05544	0.10508	0.05921	0.07539	0.1364	0.08965	0.05512	0.03878	-0.0302	-0.02414	0.05068	0.05863	0.02868	0.02493	0.08173
0.20199	-0.05676	-0.14316	-0.16545	0.01215	0.30908	0.36275	0.05632	-0.18775	-0.05838	0.1441	0.07739	-0.05446	-0.06189	-0.09198	-0.162	-0.01792	0.15582	0.08396	5.56427e-05	0.01833	0.01426	0.00325	0.00932	-0.00822	-0.06686	-0.21643	-0.35821	-0.39692	-0.29132	-0.0867	-0.02207	-0.11063	-0.09859	-0.02662	0.05831	0.11285	0.06516	0.07954	0.14092	0.09173	0.05701	0.04293	-0.02674	-0.02413	0.04909	0.05749	0.02953	0.0287	0.08674
0.20223	-0.05982	-0.14811	-0.16911	0.00971	0.30628	0.35923	0.05658	-0.18428	-0.05723	0.14056	0.07651	-0.04855	-0.05348	-0.0839	-0.15584	-0.0151	0.15569	0.08121	-0.00506	0.0117	0.00545	-0.00658	0.000701156	-0.01179	-0.06671	-0.22335	-0.37458	-0.41284	-0.29886	-0.08856	-0.02557	-0.1165	-0.10286	-0.02873	0.06104	0.12064	0.07125	0.08363	0.14512	0.09346	0.05862	0.04672	-0.02364	-0.02442	0.04717	0.05615	0.03039	0.03247	0.09155
0.20247	-0.06294	-0.15318	-0.17292	0.00714	0.30332	0.35568	0.05716	-0.18028	-0.05583	0.13689	0.07533	-0.04299	-0.0453	-0.07564	-0.14927	-0.01208	0.15556	0.07842	-0.01037	0.00494	-0.00301	-0.01594	-0.00789	-0.01562	-0.06659	-0.2299	-0.39058	-0.42875	-0.3066	-0.09059	-0.02911	-0.12216	-0.10699	-0.03097	0.06358	0.12842	0.07745	0.08766	0.14897	0.09481	0.05992	0.05011	-0.02096	-0.02504	0.04492	0.05459	0.03125	0.03619	0.09612
0.20272	-0.06609	-0.15835	-0.17684	0.00446	0.30024	0.35213	0.05809	-0.17574	-0.05417	0.13309	0.07388	-0.03779	-0.03736	-0.06726	-0.1423	-0.00886	0.15547	0.0756	-0.01587	-0.00192	-0.0111	-0.02477	-0.01641	-0.0197	-0.06654	-0.23607	-0.40617	-0.44458	-0.31454	-0.09281	-0.03266	-0.12754	-0.11094	-0.03334	0.0659	0.13611	0.08371	0.0916	0.15242	0.09576	0.06089	0.05304	-0.01874	-0.026	0.04233	0.05284	0.0321	0.03984	0.10037
0.20296	-0.06925	-0.16356	-0.18084	0.00172	0.29706	0.34863	0.05938	-0.17067	-0.05226	0.12921	0.07218	-0.03294	-0.0297	-0.05878	-0.13498	-0.00545	0.15543	0.07277	-0.02154	-0.00887	-0.01881	-0.03306	-0.02482	-0.02402	-0.06656	-0.24186	-0.42127	-0.46027	-0.32265	-0.0952	-0.03619	-0.13261	-0.11468	-0.03584	0.06795	0.14365	0.09002	0.09541	0.15544	0.09628	0.06151	0.05549	-0.01702	-0.02733	0.03942	0.05088	0.03293	0.04339	0.10424
0.2032	-0.07238	-0.16877	-0.18486	-0.00107	0.2938	0.34518	0.06105	-0.16507	-0.05009	0.12526	0.07025	-0.02845	-0.02231	-0.05023	-0.12736	-0.00186	0.15548	0.06997	-0.02736	-0.01589	-0.02611	-0.04079	-0.03308	-0.02857	-0.06668	-0.24724	-0.43584	-0.47578	-0.33091	-0.09776	-0.03966	-0.13731	-0.11819	-0.03848	0.0697	0.15098	0.09631	0.09908	0.158	0.09636	0.06177	0.05742	-0.01584	-0.02902	0.03621	0.04875	0.03375	0.04679	0.10769
0.20344	-0.07545	-0.17392	-0.18888	-0.00387	0.29049	0.34182	0.06313	-0.15893	-0.04765	0.12129	0.06812	-0.02431	-0.0152	-0.04167	-0.11947	0.00191	0.15563	0.06722	-0.0333	-0.02298	-0.03301	-0.04793	-0.04117	-0.03334	-0.06691	-0.25221	-0.44981	-0.49103	-0.33929	-0.10049	-0.04304	-0.1416	-0.12144	-0.04126	0.07108	0.15803	0.10255	0.10258	0.16007	0.09597	0.06167	0.05882	-0.01523	-0.0311	0.0327	0.04645	0.03454	0.05002	0.11064
0.20369	-0.07844	-0.17894	-0.19282	-0.00664	0.28716	0.33857	0.06561	-0.15225	-0.04494	0.11734	0.06583	-0.02051	-0.0084	-0.03312	-0.11135	0.00585	0.15591	0.06455	-0.03934	-0.03011	-0.03948	-0.05448	-0.04906	-0.03832	-0.06727	-0.25677	-0.46315	-0.50597	-0.34775	-0.10337	-0.04632	-0.14545	-0.12441	-0.04418	0.07208	0.16474	0.10871	0.10587	0.16162	0.09512	0.06119	0.05969	-0.01519	-0.03355	0.02894	0.04401	0.0353	0.05305	0.11305
0.20393	-0.0813	-0.18377	-0.19662	-0.00935	0.28382	0.33545	0.06852	-0.14505	-0.04193	0.11345	0.0634	-0.01704	-0.00189	-0.02462	-0.10305	0.00994	0.15634	0.06198	-0.04546	-0.03725	-0.04554	-0.06042	-0.05671	-0.04349	-0.06778	-0.26092	-0.47579	-0.52052	-0.35627	-0.1064	-0.04947	-0.14881	-0.12706	-0.04725	0.07265	0.17104	0.11473	0.10894	0.16263	0.09378	0.06035	0.06002	-0.01574	-0.03636	0.02495	0.04146	0.03604	0.05586	0.1149
0.20417	-0.08401	-0.18834	-0.20023	-0.01195	0.28048	0.33246	0.07185	-0.13732	-0.03863	0.10966	0.06088	-0.01388	0.00431	-0.0162	-0.09461	0.01419	0.15694	0.05953	-0.05162	-0.0444	-0.05118	-0.06577	-0.06411	-0.04885	-0.06847	-0.26465	-0.48768	-0.53463	-0.36481	-0.10957	-0.05247	-0.15165	-0.12939	-0.05046	0.07274	0.17688	0.12057	0.11176	0.16308	0.09196	0.05916	0.05981	-0.01688	-0.03953	0.02076	0.03883	0.03677	0.05842	0.11613
0.20441	-0.08652	-0.19259	-0.20358	-0.01442	0.27718	0.32962	0.07562	-0.12907	-0.03501	0.10602	0.0583	-0.01101	0.0102	-0.00791	-0.08608	0.01858	0.15772	0.05722	-0.05779	-0.05152	-0.0564	-0.07052	-0.07123	-0.05437	-0.06933	-0.26796	-0.49879	-0.54823	-0.37332	-0.11288	-0.05529	-0.15394	-0.13137	-0.05382	0.07234	0.18219	0.1262	0.11431	0.16296	0.08966	0.05762	0.05908	-0.01858	-0.04303	0.01642	0.03614	0.03749	0.06072	0.11673
0.20466	-0.0888	-0.19643	-0.20658	-0.0167	0.27391	0.32693	0.07981	-0.12032	-0.03107	0.10257	0.05569	-0.00843	0.01577	0.000225414	-0.07748	0.02309	0.15869	0.05508	-0.06395	-0.05859	-0.0612	-0.07469	-0.07807	-0.06006	-0.07039	-0.27086	-0.50906	-0.56124	-0.38177	-0.11631	-0.05793	-0.15565	-0.13299	-0.05731	0.0714	0.18692	0.13158	0.11657	0.16224	0.08689	0.05575	0.05787	-0.02083	-0.04684	0.01195	0.03345	0.03821	0.06275	0.11669
0.2049	-0.09082	-0.19982	-0.20919	-0.01876	0.27068	0.3244	0.08442	-0.11107	-0.02679	0.09935	0.0531	-0.00612	0.02103	0.00817	-0.06887	0.02773	0.15987	0.05313	-0.07006	-0.06558	-0.06561	-0.07829	-0.08459	-0.06589	-0.07167	-0.27334	-0.51846	-0.5736	-0.39011	-0.11985	-0.06036	-0.15675	-0.13422	-0.06095	0.06991	0.19102	0.13667	0.11851	0.16092	0.08365	0.05358	0.05618	-0.02361	-0.05093	0.0074	0.03079	0.03895	0.06452	0.116
0.20514	-0.09255	-0.20266	-0.21132	-0.02057	0.26751	0.32201	0.08944	-0.10134	-0.02216	0.09641	0.05055	-0.00406	0.02597	0.01589	-0.06028	0.03247	0.16126	0.05137	-0.07608	-0.07248	-0.06961	-0.08134	-0.0908	-0.07184	-0.07316	-0.27542	-0.52693	-0.58525	-0.3983	-0.1235	-0.06257	-0.15723	-0.13505	-0.06471	0.06784	0.19445	0.14144	0.12013	0.159	0.07996	0.05113	0.05408	-0.02687	-0.05527	0.00282	0.02821	0.03974	0.06603	0.11468
0.20538	-0.09395	-0.20492	-0.21292	-0.02209	0.26438	0.31976	0.09485	-0.09115	-0.01718	0.09377	0.04807	-0.00223	0.03059	0.02336	-0.05175	0.03731	0.16285	0.04982	-0.08198	-0.07924	-0.07322	-0.08385	-0.09668	-0.0779	-0.07488	-0.27709	-0.53445	-0.59612	-0.40628	-0.12723	-0.06455	-0.15707	-0.13546	-0.0686	0.06519	0.19718	0.14586	0.1214	0.15648	0.07583	0.04844	0.05159	-0.03056	-0.05982	-0.00175	0.02574	0.04059	0.0673	0.11273
0.20563	-0.095	-0.20651	-0.21391	-0.0233	0.26131	0.31764	0.10063	-0.08052	-0.01184	0.09149	0.04571	-0.000603784	0.0349	0.03054	-0.04332	0.04223	0.16466	0.0485	-0.08773	-0.08583	-0.07644	-0.08585	-0.10223	-0.08405	-0.07682	-0.27836	-0.54098	-0.60614	-0.41401	-0.13104	-0.06628	-0.15625	-0.13545	-0.0726	0.06194	0.19917	0.1499	0.12231	0.15335	0.0713	0.04553	0.04877	-0.03465	-0.06455	-0.00626	0.02343	0.04153	0.06835	0.11019
0.20587	-0.09567	-0.2074	-0.21425	-0.02416	0.25829	0.31563	0.10673	-0.06949	-0.00614	0.08958	0.04348	0.000824099	0.03889	0.03741	-0.03502	0.04722	0.16668	0.04742	-0.09329	-0.09224	-0.07929	-0.08737	-0.10744	-0.09027	-0.07899	-0.27924	-0.54649	-0.61525	-0.42143	-0.1349	-0.06777	-0.15477	-0.13501	-0.0767	0.05809	0.2004	0.15355	0.12287	0.14962	0.06638	0.04243	0.04566	-0.03908	-0.06939	-0.01066	0.02133	0.04258	0.0692	0.1071
0.20611	-0.09595	-0.20754	-0.21389	-0.02465	0.2553	0.31371	0.11313	-0.05808	-7.94481e-05	0.08806	0.0414	0.00208	0.04257	0.04394	-0.02688	0.05227	0.1689	0.04658	-0.09863	-0.09842	-0.08178	-0.08843	-0.11233	-0.09655	-0.08138	-0.27971	-0.55094	-0.62339	-0.4285	-0.13879	-0.06899	-0.15262	-0.13414	-0.0809	0.05363	0.20086	0.1568	0.12305	0.14531	0.0611	0.0392	0.04232	-0.04377	-0.07431	-0.0149	0.01948	0.04377	0.06987	0.10349
0.20635	-0.09582	-0.20688	-0.21277	-0.02475	0.25236	0.31185	0.11979	-0.04635	0.00633	0.08697	0.03951	0.00317	0.04595	0.05012	-0.01894	0.05736	0.17132	0.046	-0.1037	-0.10434	-0.08391	-0.08907	-0.11688	-0.10286	-0.084	-0.27979	-0.55433	-0.63052	-0.43517	-0.1427	-0.06994	-0.1498	-0.13282	-0.08518	0.04859	0.20054	0.15963	0.12286	0.14043	0.0555	0.03585	0.03881	-0.04867	-0.07925	-0.01895	0.01793	0.04513	0.07041	0.09942
0.2066	-0.09527	-0.2054	-0.21087	-0.02445	0.24945	0.31003	0.12664	-0.03434	0.01307	0.0863	0.0378	0.00411	0.04902	0.05591	-0.01121	0.06249	0.17394	0.04568	-0.10849	-0.10999	-0.0857	-0.08931	-0.12111	-0.10919	-0.08682	-0.27948	-0.55661	-0.63657	-0.44138	-0.14661	-0.07063	-0.14632	-0.13108	-0.08954	0.04296	0.19945	0.16205	0.12231	0.13501	0.04961	0.03244	0.0352	-0.0537	-0.08415	-0.02274	0.01671	0.04669	0.07085	0.09496
0.20684	-0.0943	-0.20309	-0.20817	-0.02373	0.24657	0.30822	0.13365	-0.02211	0.02012	0.08606	0.03629	0.00491	0.0518	0.0613	-0.00374	0.06763	0.17674	0.04563	-0.11296	-0.11531	-0.08716	-0.0892	-0.12502	-0.11552	-0.08983	-0.27878	-0.55779	-0.64151	-0.44709	-0.15049	-0.07104	-0.14219	-0.12892	-0.09395	0.03678	0.1976	0.16404	0.1214	0.12907	0.04347	0.029	0.03153	-0.05878	-0.08896	-0.02623	0.01586	0.04846	0.07122	0.09016
0.20708	-0.09289	-0.19994	-0.20463	-0.02258	0.2437	0.3064	0.14074	-0.00971	0.02745	0.08625	0.03498	0.00558	0.05426	0.06627	0.00346	0.07278	0.17971	0.04584	-0.11707	-0.1203	-0.0883	-0.08876	-0.12861	-0.12182	-0.09304	-0.2777	-0.55784	-0.64528	-0.45225	-0.15431	-0.07118	-0.13743	-0.12635	-0.09842	0.03007	0.195	0.16562	0.12014	0.12264	0.03713	0.02558	0.02787	-0.06384	-0.0936	-0.02937	0.01543	0.05047	0.07158	0.08509
0.20732	-0.09107	-0.19594	-0.20026	-0.02101	0.24084	0.30452	0.14786	0.00278	0.03503	0.08684	0.03386	0.00612	0.05643	0.0708	0.01036	0.07791	0.18283	0.04632	-0.12081	-0.12493	-0.08913	-0.08802	-0.13189	-0.12806	-0.0964	-0.27622	-0.55675	-0.64786	-0.45681	-0.15806	-0.07104	-0.13206	-0.12339	-0.10292	0.02286	0.19169	0.1668	0.11855	0.11576	0.03062	0.0222	0.02428	-0.0688	-0.09802	-0.03211	0.01546	0.05276	0.07197	0.07984
0.20757	-0.08883	-0.19112	-0.19507	-0.01902	0.23797	0.30256	0.15492	0.0153	0.04282	0.08783	0.03292	0.00653	0.05829	0.07486	0.01693	0.08302	0.18609	0.04707	-0.12415	-0.12917	-0.08968	-0.08702	-0.13486	-0.13423	-0.09991	-0.27437	-0.55453	-0.64919	-0.46072	-0.16169	-0.07063	-0.12611	-0.12005	-0.10745	0.01518	0.1877	0.1676	0.11664	0.10847	0.02399	0.01892	0.02082	-0.07357	-0.10214	-0.0344	0.01596	0.05534	0.07243	0.07449
0.20781	-0.0862	-0.18549	-0.18907	-0.01661	0.2351	0.30047	0.16186	0.02777	0.05077	0.08918	0.03215	0.0068	0.05983	0.07845	0.02315	0.08806	0.18947	0.04806	-0.12707	-0.13299	-0.08995	-0.08579	-0.13753	-0.1403	-0.10354	-0.27213	-0.55115	-0.64926	-0.46394	-0.16519	-0.06995	-0.11961	-0.11637	-0.11199	0.00709	0.18308	0.16803	0.11443	0.10082	0.01729	0.01576	0.01755	-0.07808	-0.10591	-0.03621	0.01698	0.05824	0.07303	0.06911
0.20805	-0.0832	-0.1791	-0.18229	-0.0138	0.2322	0.29823	0.16861	0.0401	0.05884	0.09085	0.03151	0.00693	0.06106	0.08155	0.02899	0.09304	0.19294	0.04931	-0.12956	-0.13639	-0.08995	-0.08435	-0.13989	-0.14623	-0.10726	-0.2695	-0.54664	-0.64803	-0.46642	-0.16853	-0.069	-0.11259	-0.11238	-0.11654	-0.00138	0.17786	0.16811	0.11196	0.09285	0.01056	0.01275	0.01451	-0.08225	-0.10925	-0.03749	0.01853	0.06147	0.0738	0.06381
0.20829	-0.07985	-0.172	-0.17477	-0.01061	0.22928	0.2958	0.17506	0.05222	0.06697	0.09281	0.03099	0.00691	0.06198	0.08414	0.03445	0.09792	0.19647	0.0508	-0.13159	-0.13934	-0.08969	-0.08274	-0.14196	-0.152	-0.11105	-0.26649	-0.54098	-0.64549	-0.46813	-0.17167	-0.06779	-0.10511	-0.10811	-0.12108	-0.01016	0.17211	0.16788	0.10925	0.08462	0.00385	0.00993	0.01175	-0.086	-0.11212	-0.03819	0.02064	0.06505	0.07482	0.05867
0.20854	-0.07619	-0.16423	-0.16656	-0.00706	0.22631	0.29313	0.18116	0.06404	0.07511	0.09502	0.03055	0.00675	0.06259	0.08622	0.03949	0.10267	0.20005	0.05252	-0.13316	-0.14182	-0.0892	-0.08098	-0.14374	-0.15759	-0.11487	-0.2631	-0.53419	-0.64161	-0.46902	-0.17458	-0.06632	-0.0972	-0.1036	-0.1256	-0.01922	0.16589	0.16736	0.10633	0.07619	-0.00279	0.00732	0.00932	-0.08927	-0.11443	-0.0383	0.02332	0.06901	0.07612	0.05377
0.20878	-0.07224	-0.15587	-0.15772	-0.00319	0.2233	0.2902	0.18681	0.07548	0.08321	0.09743	0.03016	0.00642	0.06289	0.0878	0.04411	0.10729	0.20364	0.05446	-0.13425	-0.14383	-0.08848	-0.0791	-0.14523	-0.16296	-0.1187	-0.25933	-0.52628	-0.6364	-0.46907	-0.17723	-0.0646	-0.08892	-0.09889	-0.13009	-0.02848	0.15925	0.16658	0.10324	0.06761	-0.00932	0.00494	0.00725	-0.09199	-0.11615	-0.03776	0.0266	0.07334	0.07775	0.0492
0.20902	-0.06805	-0.14699	-0.14831	0.0009838	0.22023	0.28696	0.19194	0.08646	0.0912	0.09998	0.02979	0.00593	0.06288	0.08886	0.04831	0.11175	0.20723	0.05661	-0.13487	-0.14535	-0.08754	-0.07713	-0.14644	-0.1681	-0.12251	-0.25517	-0.51728	-0.62986	-0.46826	-0.1796	-0.06264	-0.08032	-0.09402	-0.13456	-0.03791	0.15227	0.16559	0.10003	0.05894	-0.0157	0.00281	0.00558	-0.0941	-0.11721	-0.03657	0.03047	0.07805	0.07977	0.04506
0.20926	-0.06365	-0.13767	-0.13842	0.00541	0.21709	0.28339	0.19647	0.09689	0.09905	0.10262	0.02939	0.00527	0.06257	0.08941	0.05206	0.11602	0.21079	0.05896	-0.135	-0.14638	-0.08639	-0.07509	-0.14738	-0.17297	-0.12627	-0.25065	-0.50721	-0.62199	-0.46655	-0.18166	-0.06044	-0.07145	-0.08905	-0.13898	-0.04743	0.145	0.16442	0.09672	0.05024	-0.02189	0.000937625	0.00433	-0.09554	-0.11757	-0.03469	0.03494	0.08315	0.08222	0.04141
0.20951	-0.0591	-0.12799	-0.12812	0.01006	0.21389	0.27947	0.20033	0.10671	0.10669	0.10532	0.02894	0.00444	0.06198	0.08947	0.05537	0.1201	0.21432	0.0615	-0.13465	-0.14691	-0.08505	-0.073	-0.14805	-0.17757	-0.12995	-0.24576	-0.4961	-0.61282	-0.46394	-0.18337	-0.05802	-0.06239	-0.08402	-0.14336	-0.05699	0.13751	0.16309	0.09336	0.04159	-0.02785	-0.000659951	0.00351	-0.09626	-0.11719	-0.0321	0.04001	0.08864	0.08513	0.03833
0.20975	-0.05443	-0.11803	-0.11749	0.01489	0.21062	0.27517	0.20346	0.11584	0.11407	0.108	0.02841	0.00343	0.06111	0.08904	0.05825	0.12397	0.21779	0.06423	-0.13382	-0.14694	-0.08353	-0.07088	-0.14846	-0.18186	-0.13354	-0.2405	-0.484	-0.60237	-0.46041	-0.18471	-0.05538	-0.05318	-0.07898	-0.14769	-0.06655	0.12988	0.16166	0.09	0.03303	-0.03354	-0.00198	0.00315	-0.09623	-0.11602	-0.0288	0.04567	0.09451	0.08853	0.03589
0.20999	-0.04968	-0.1079	-0.10663	0.01986	0.20727	0.27046	0.2058	0.12422	0.12115	0.11064	0.02776	0.00226	0.05998	0.08813	0.06068	0.12762	0.22119	0.06713	-0.13253	-0.14649	-0.08183	-0.06875	-0.14862	-0.18584	-0.13699	-0.2349	-0.47094	-0.59066	-0.45597	-0.18567	-0.05253	-0.04389	-0.07399	-0.15197	-0.07603	0.12216	0.16014	0.08667	0.02462	-0.03894	-0.00303	0.00326	-0.0954	-0.11404	-0.02477	0.05192	0.10075	0.09246	0.03415
0.21023	-0.0449	-0.09766	-0.09562	0.02491	0.20384	0.26534	0.2073	0.13178	0.12788	0.11316	0.02696	0.000910393	0.0586	0.08677	0.06268	0.13104	0.22452	0.07021	-0.13079	-0.14555	-0.07997	-0.06663	-0.14854	-0.1895	-0.1403	-0.22897	-0.45697	-0.57776	-0.4506	-0.18621	-0.04949	-0.03457	-0.06909	-0.15619	-0.08539	0.11442	0.15859	0.08342	0.01643	-0.04402	-0.00381	0.00383	-0.09376	-0.11122	-0.02	0.05875	0.10736	0.09693	0.03316
0.21048	-0.04014	-0.08742	-0.08454	0.03001	0.20034	0.2598	0.20792	0.13849	0.13421	0.11555	0.02598	-0.000599325	0.05699	0.08496	0.06426	0.13423	0.22778	0.07345	-0.12862	-0.14414	-0.07795	-0.06453	-0.14822	-0.19281	-0.14343	-0.2227	-0.44215	-0.56369	-0.44434	-0.18632	-0.04627	-0.02531	-0.06434	-0.16036	-0.09457	0.10672	0.15702	0.08028	0.00852	-0.04875	-0.00432	0.00487	-0.09127	-0.10755	-0.01452	0.06613	0.11431	0.10195	0.03296
0.21072	-0.03543	-0.07725	-0.07349	0.03512	0.19675	0.25384	0.20763	0.1443	0.1401	0.11774	0.02482	-0.00227	0.05515	0.08274	0.06543	0.13718	0.23096	0.07684	-0.12603	-0.14228	-0.07578	-0.06245	-0.14768	-0.19578	-0.14638	-0.21613	-0.42654	-0.54852	-0.43717	-0.18598	-0.04286	-0.01614	-0.0598	-0.16447	-0.10354	0.09912	0.15547	0.07729	0.00092409	-0.05311	-0.00458	0.00637	-0.08792	-0.10301	-0.00831	0.07405	0.12158	0.10754	0.03359
0.21096	-0.03081	-0.06724	-0.06255	0.04019	0.19308	0.24744	0.20641	0.14917	0.14553	0.11969	0.02344	-0.00408	0.05312	0.08012	0.06621	0.13989	0.23406	0.08038	-0.12306	-0.13998	-0.07348	-0.06041	-0.14693	-0.1984	-0.14912	-0.20927	-0.41019	-0.53231	-0.42913	-0.18518	-0.03929	-0.00714	-0.05552	-0.16853	-0.11224	0.09167	0.15397	0.07448	-0.0063	-0.05709	-0.00459	0.00831	-0.08372	-0.09761	-0.0014	0.08248	0.12917	0.11368	0.03506
0.2112	-0.02632	-0.05746	-0.05179	0.04518	0.18933	0.24062	0.20425	0.15308	0.15046	0.12138	0.02182	-0.00603	0.0509	0.07714	0.06661	0.14237	0.23708	0.08405	-0.11973	-0.13727	-0.07105	-0.05841	-0.14597	-0.20069	-0.15166	-0.20213	-0.39319	-0.51513	-0.42024	-0.1839	-0.03557	0.00164	-0.05154	-0.17255	-0.12064	0.08443	0.15254	0.07188	-0.0131	-0.06066	-0.00437	0.01069	-0.07866	-0.09135	0.00619	0.09139	0.13703	0.12037	0.03738
0.21145	-0.022	-0.04799	-0.04128	0.05005	0.18551	0.23338	0.20115	0.15603	0.15487	0.12277	0.01997	-0.00811	0.04852	0.07382	0.06665	0.14462	0.24002	0.08785	-0.11606	-0.13418	-0.0685	-0.05645	-0.14483	-0.20264	-0.15397	-0.19474	-0.37558	-0.49704	-0.41053	-0.18214	-0.0317	0.01013	-0.04793	-0.17653	-0.12871	0.07743	0.15119	0.06953	-0.01944	-0.06383	-0.00395	0.0135	-0.07274	-0.08425	0.01443	0.10076	0.14514	0.12758	0.04055
0.21169	-0.01786	-0.03887	-0.03111	0.05478	0.1816	0.22574	0.19711	0.158	0.15873	0.12384	0.01787	-0.01031	0.046	0.0702	0.06638	0.14664	0.24289	0.09177	-0.1121	-0.13072	-0.06584	-0.05454	-0.14352	-0.20426	-0.15605	-0.18712	-0.35746	-0.47812	-0.40004	-0.1799	-0.0277	0.01829	-0.04473	-0.18049	-0.13641	0.07072	0.14995	0.06743	-0.0253	-0.06658	-0.00332	0.0167	-0.06599	-0.07633	0.02329	0.11053	0.15347	0.1353	0.04455
0.21193	-0.01395	-0.03018	-0.02131	0.05932	0.17763	0.21771	0.19215	0.15901	0.16205	0.12456	0.01551	-0.0126	0.04335	0.06631	0.06581	0.14845	0.24568	0.09579	-0.10788	-0.12693	-0.06307	-0.05268	-0.14205	-0.20557	-0.15789	-0.17929	-0.33888	-0.45847	-0.38882	-0.17718	-0.02358	0.02606	-0.042	-0.18443	-0.14372	0.06431	0.14881	0.06561	-0.03063	-0.06892	-0.00253	0.02027	-0.05845	-0.06763	0.03272	0.12068	0.16198	0.14349	0.04936
0.21217	-0.01027	-0.02195	-0.01196	0.06365	0.17358	0.20931	0.1863	0.15907	0.16482	0.12492	0.01291	-0.01498	0.0406	0.0622	0.06499	0.15005	0.24839	0.09989	-0.10342	-0.12283	-0.0602	-0.05087	-0.14045	-0.20659	-0.1595	-0.17127	-0.31993	-0.43815	-0.3769	-0.17398	-0.01934	0.03339	-0.03978	-0.18837	-0.15064	0.05825	0.14779	0.06408	-0.03542	-0.07084	-0.00157	0.02419	-0.05012	-0.05818	0.04268	0.13115	0.17064	0.1521	0.05495
0.21242	-0.00685	-0.01423	-0.00309	0.06774	0.16946	0.20055	0.17961	0.15823	0.16704	0.12493	0.01007	-0.01742	0.03777	0.0579	0.06396	0.15147	0.25104	0.10408	-0.09877	-0.11846	-0.05723	-0.04909	-0.13873	-0.20733	-0.16086	-0.16308	-0.30068	-0.41727	-0.36435	-0.17032	-0.015	0.04023	-0.03812	-0.19233	-0.15714	0.05254	0.14688	0.06283	-0.03965	-0.07235	-0.000481142	0.02844	-0.04107	-0.04805	0.05312	0.14191	0.17941	0.1611	0.06126
0.21266	-0.0037	-0.00705	0.00526	0.07158	0.16527	0.19148	0.17212	0.15652	0.16874	0.12459	0.00701	-0.01991	0.03489	0.05347	0.06276	0.15272	0.25362	0.10833	-0.09395	-0.11384	-0.05417	-0.04736	-0.13691	-0.20781	-0.16198	-0.15476	-0.28121	-0.39591	-0.35122	-0.1662	-0.01058	0.04656	-0.03705	-0.19632	-0.16322	0.04719	0.14607	0.06188	-0.04331	-0.07346	0.000725842	0.03297	-0.03133	-0.03727	0.06398	0.15291	0.18826	0.17042	0.06825
0.2129	-0.000821748	-0.000420369	0.01307	0.07514	0.16103	0.18212	0.16388	0.15399	0.16993	0.12391	0.00375	-0.02243	0.03197	0.04895	0.06143	0.15383	0.25614	0.11262	-0.089	-0.10899	-0.05101	-0.04564	-0.135	-0.20806	-0.16286	-0.14631	-0.2616	-0.37417	-0.33759	-0.16165	-0.00607	0.05232	-0.03661	-0.20037	-0.16889	0.04221	0.14535	0.0612	-0.04639	-0.07418	0.00203	0.03776	-0.02097	-0.02592	0.0752	0.1641	0.19714	0.18002	0.07585
0.21314	0.00177	0.00564	0.02032	0.07842	0.15672	0.17249	0.15496	0.15071	0.17066	0.12293	0.000323071	-0.02495	0.02904	0.04439	0.06004	0.15481	0.25861	0.11695	-0.08395	-0.10396	-0.04776	-0.04395	-0.13303	-0.2081	-0.16349	-0.13776	-0.24192	-0.35214	-0.3235	-0.15669	-0.0015	0.05751	-0.03683	-0.20448	-0.17414	0.0376	0.1447	0.0608	-0.0489	-0.07451	0.00342	0.04278	-0.01003	-0.01407	0.08672	0.17544	0.20602	0.18983	0.084
0.21339	0.00408	0.01114	0.027	0.08141	0.15236	0.16263	0.14542	0.14674	0.17097	0.12167	-0.00323	-0.02745	0.02614	0.03984	0.05863	0.1557	0.26101	0.12129	-0.07884	-0.09877	-0.04443	-0.04225	-0.131	-0.20795	-0.16388	-0.12913	-0.22225	-0.32993	-0.30904	-0.15133	0.00313	0.0621	-0.03772	-0.20868	-0.17898	0.03336	0.1441	0.06064	-0.05085	-0.07449	0.00488	0.048	0.00141	-0.00177	0.09847	0.18687	0.21487	0.19979	0.09262
0.21363	0.00612	0.01606	0.03311	0.08409	0.14793	0.15258	0.13535	0.14217	0.17089	0.12019	-0.00687	-0.0299	0.02327	0.03536	0.05725	0.15651	0.26336	0.12563	-0.0737	-0.09344	-0.041	-0.04055	-0.12892	-0.20762	-0.16402	-0.12044	-0.20266	-0.30761	-0.29426	-0.14561	0.00782	0.06606	-0.03932	-0.213	-0.18343	0.02947	0.14354	0.06071	-0.05225	-0.07411	0.00639	0.05339	0.01331	0.01088	0.11038	0.19835	0.22364	0.20983	0.10162
0.21387	0.00789	0.02044	0.03866	0.08647	0.14345	0.14236	0.12482	0.13707	0.1705	0.11852	-0.01055	-0.03229	0.02047	0.03099	0.05596	0.15727	0.26564	0.12993	-0.06856	-0.08801	-0.03749	-0.03882	-0.12682	-0.20716	-0.16393	-0.11172	-0.18321	-0.28528	-0.27924	-0.13955	0.01255	0.06941	-0.04164	-0.21744	-0.18751	0.02594	0.14299	0.06099	-0.05312	-0.0734	0.00796	0.05894	0.02559	0.02382	0.1224	0.20983	0.23232	0.21989	0.11094
0.21411	0.0094	0.02429	0.04366	0.08855	0.1389	0.13201	0.11391	0.13154	0.16985	0.11674	-0.01422	-0.03457	0.01776	0.02678	0.05481	0.158	0.26785	0.13418	-0.06344	-0.08249	-0.03389	-0.03704	-0.12469	-0.20658	-0.16362	-0.10297	-0.16398	-0.26302	-0.26403	-0.13317	0.01734	0.07214	-0.04467	-0.22202	-0.19121	0.02274	0.14241	0.06142	-0.05348	-0.07237	0.00956	0.06461	0.03819	0.03697	0.13444	0.22127	0.24086	0.2299	0.12047
0.21435	0.01067	0.02764	0.04814	0.09033	0.1343	0.12158	0.10271	0.12565	0.16899	0.11489	-0.01783	-0.03673	0.01516	0.02277	0.05383	0.15872	0.26997	0.13836	-0.05838	-0.07691	-0.03019	-0.0352	-0.12256	-0.20591	-0.16307	-0.09422	-0.14501	-0.24092	-0.2487	-0.12649	0.02218	0.07425	-0.04842	-0.22676	-0.19458	0.01986	0.14178	0.062	-0.05335	-0.07106	0.01121	0.07039	0.05104	0.05025	0.14645	0.23263	0.24925	0.2398	0.13014
0.2146	0.01171	0.03051	0.05211	0.09182	0.12964	0.11109	0.09129	0.11951	0.16801	0.11304	-0.02132	-0.03874	0.0127	0.01903	0.05307	0.15944	0.27198	0.14242	-0.05341	-0.07129	-0.0264	-0.03328	-0.12042	-0.20517	-0.16232	-0.08549	-0.12637	-0.21904	-0.23331	-0.11953	0.02707	0.07577	-0.05289	-0.23168	-0.19761	0.01728	0.14108	0.06266	-0.05279	-0.06946	0.0129	0.07627	0.06409	0.06358	0.15836	0.24386	0.25746	0.24952	0.13986
0.21484	0.01255	0.03294	0.05561	0.09302	0.12493	0.10058	0.07976	0.11319	0.16696	0.11126	-0.02464	-0.04059	0.01038	0.01557	0.05256	0.16016	0.27386	0.14633	-0.04853	-0.06565	-0.02251	-0.03127	-0.11829	-0.20439	-0.16136	-0.07679	-0.10811	-0.19745	-0.2179	-0.11231	0.03204	0.07672	-0.05806	-0.23677	-0.20034	0.01498	0.14027	0.06338	-0.05181	-0.06761	0.01462	0.08222	0.07726	0.0769	0.1701	0.25493	0.26548	0.25902	0.14953
0.21508	0.0132	0.03498	0.05867	0.09395	0.12015	0.0901	0.06818	0.10681	0.16592	0.10962	-0.02774	-0.04225	0.00824	0.01245	0.05234	0.16089	0.27559	0.15007	-0.04378	-0.05999	-0.01851	-0.02916	-0.11618	-0.20359	-0.1602	-0.06814	-0.09027	-0.17623	-0.20252	-0.10485	0.03709	0.07713	-0.06391	-0.24206	-0.20277	0.01295	0.13932	0.06411	-0.05045	-0.06553	0.01639	0.08823	0.0905	0.09014	0.18162	0.2658	0.27329	0.26822	0.15908
0.21532	0.01369	0.03666	0.06133	0.09462	0.11533	0.07967	0.05665	0.10043	0.16496	0.10818	-0.03056	-0.0437	0.00628	0.00969	0.05243	0.16162	0.27712	0.1536	-0.03916	-0.05433	-0.01441	-0.02691	-0.1141	-0.20281	-0.15887	-0.05954	-0.07289	-0.15543	-0.18723	-0.09715	0.04223	0.07702	-0.07043	-0.24754	-0.20494	0.01116	0.1382	0.06481	-0.04876	-0.06323	0.0182	0.09429	0.10375	0.10322	0.19286	0.27644	0.28088	0.27709	0.16843
0.21557	0.01403	0.03803	0.06363	0.09504	0.11046	0.06933	0.04526	0.09417	0.16413	0.10701	-0.03306	-0.04493	0.00453	0.00732	0.05284	0.16236	0.27844	0.15689	-0.0347	-0.04867	-0.01019	-0.02454	-0.11205	-0.20205	-0.15737	-0.05103	-0.05602	-0.13511	-0.17207	-0.08923	0.04749	0.07645	-0.07757	-0.25322	-0.20686	0.00959	0.13688	0.06545	-0.04676	-0.06074	0.02007	0.1004	0.11696	0.11608	0.20378	0.28683	0.28825	0.28558	0.1775
0.21581	0.01426	0.03914	0.06561	0.09524	0.10554	0.05913	0.03407	0.0881	0.16351	0.10617	-0.03518	-0.04592	0.003	0.00538	0.0536	0.16309	0.27951	0.1599	-0.03041	-0.04302	-0.00586	-0.02202	-0.11004	-0.20135	-0.15573	-0.04262	-0.03969	-0.11531	-0.15708	-0.0811	0.05288	0.07546	-0.08531	-0.25909	-0.20854	0.00821	0.13534	0.06598	-0.04449	-0.05806	0.02199	0.10654	0.13006	0.12867	0.21432	0.29693	0.2954	0.29365	0.18623
0.21605	0.01439	0.04002	0.06732	0.09522	0.10057	0.04909	0.02318	0.08232	0.16317	0.10571	-0.03689	-0.04664	0.00171	0.00388	0.05471	0.16381	0.28029	0.16261	-0.02629	-0.03739	-0.0014	-0.01934	-0.10808	-0.20072	-0.15395	-0.03431	-0.02391	-0.09608	-0.1423	-0.07278	0.05843	0.07409	-0.09361	-0.26514	-0.21	0.00702	0.13356	0.06638	-0.04199	-0.05522	0.02398	0.11271	0.14301	0.14094	0.22445	0.30673	0.30233	0.30128	0.19457
0.21629	0.01445	0.04073	0.06879	0.09502	0.09557	0.03925	0.01266	0.0769	0.16315	0.1057	-0.03814	-0.04709	0.000678264	0.00285	0.05617	0.16449	0.28075	0.16499	-0.02235	-0.03177	0.00317	-0.0165	-0.10617	-0.20019	-0.15205	-0.02613	-0.00872	-0.07747	-0.12776	-0.06427	0.06414	0.07239	-0.10242	-0.27138	-0.21127	0.00598	0.13151	0.06661	-0.03927	-0.05223	0.02604	0.11891	0.15578	0.15285	0.23416	0.31623	0.30906	0.30844	0.20244
0.21654	0.01445	0.0413	0.07007	0.09463	0.09054	0.02965	0.00258	0.07192	0.16352	0.10618	-0.0389	-0.04726	-8.73654e-05	0.00229	0.05797	0.16513	0.28087	0.167	-0.01859	-0.02616	0.00788	-0.01348	-0.10431	-0.19978	-0.15007	-0.01809	0.00587	-0.05948	-0.11348	-0.05559	0.07003	0.07042	-0.1117	-0.27777	-0.21234	0.00508	0.12917	0.06664	-0.03638	-0.04909	0.0282	0.12513	0.16833	0.16437	0.2434	0.32541	0.31558	0.31512	0.20982
0.21678	0.01442	0.04179	0.07121	0.0941	0.08549	0.02031	-0.00699	0.06744	0.16432	0.10719	-0.03914	-0.04713	-0.000568414	0.00223	0.06012	0.1657	0.28061	0.16864	-0.01501	-0.02056	0.01272	-0.01028	-0.10252	-0.19949	-0.14801	-0.0102	0.01985	-0.04216	-0.0995	-0.04673	0.07613	0.06822	-0.12139	-0.28431	-0.21324	0.0043	0.12655	0.06647	-0.03333	-0.04581	0.03046	0.13139	0.18062	0.17547	0.25217	0.33426	0.32193	0.3213	0.21665
0.21702	0.01438	0.04222	0.07223	0.09343	0.08042	0.01128	-0.01599	0.06355	0.16558	0.10876	-0.03885	-0.0467	-0.000750793	0.00266	0.0626	0.16618	0.27995	0.16988	-0.01161	-0.01496	0.0177	-0.0069	-0.10077	-0.19935	-0.14591	-0.00248	0.03321	-0.0255	-0.08581	-0.0377	0.08244	0.06584	-0.13143	-0.29097	-0.21396	0.00364	0.12362	0.06606	-0.03015	-0.04239	0.03283	0.13767	0.19265	0.18616	0.26047	0.3428	0.32811	0.32699	0.22291
0.21726	0.01435	0.04264	0.07319	0.09265	0.07535	0.00258	-0.02435	0.06029	0.16735	0.11091	-0.038	-0.04596	-0.000620819	0.00359	0.06539	0.16655	0.27885	0.1707	-0.00839	-0.00935	0.02282	-0.00332	-0.09908	-0.19937	-0.14378	0.00504	0.04596	-0.00953	-0.07243	-0.02851	0.08899	0.06334	-0.14178	-0.29773	-0.2145	0.00309	0.12039	0.0654	-0.02684	-0.03885	0.03535	0.144	0.20439	0.1964	0.2683	0.35103	0.33416	0.33218	0.22856
0.21751	0.01434	0.04308	0.07411	0.09179	0.07029	-0.00575	-0.03202	0.0577	0.16963	0.11364	-0.03661	-0.0449	-0.000166442	0.00502	0.06846	0.16678	0.2773	0.17109	-0.00533	-0.00373	0.02809	0.00046049	-0.09743	-0.19956	-0.14165	0.01237	0.05809	0.00578	-0.05935	-0.01913	0.09577	0.06076	-0.15236	-0.30453	-0.21488	0.00262	0.11686	0.0645	-0.02343	-0.03516	0.03802	0.15039	0.21585	0.20623	0.27567	0.35895	0.34008	0.33689	0.23361
0.21775	0.01437	0.04358	0.07503	0.09086	0.06527	-0.01368	-0.03895	0.05584	0.17244	0.11695	-0.03467	-0.04353	0.00062398	0.00694	0.07178	0.16685	0.27527	0.17105	-0.00243	0.00193	0.03352	0.00444	-0.09582	-0.19991	-0.13954	0.01948	0.06961	0.02042	-0.04655	-0.00957	0.10282	0.05816	-0.16312	-0.31135	-0.21508	0.00225	0.11304	0.06335	-0.01991	-0.03133	0.04087	0.15684	0.22701	0.21565	0.28261	0.36658	0.34592	0.34112	0.23802
0.21799	0.01445	0.04416	0.07598	0.08989	0.06031	-0.02117	-0.04509	0.05473	0.17579	0.12083	-0.0322	-0.04185	0.00176	0.00934	0.07531	0.16672	0.27275	0.17056	0.000337017	0.00764	0.0391	0.00863	-0.09425	-0.20044	-0.13748	0.02635	0.08053	0.03442	-0.03404	0.000189426	0.11014	0.05558	-0.17397	-0.31815	-0.2151	0.00196	0.10894	0.06195	-0.01629	-0.02735	0.04392	0.16338	0.23789	0.22468	0.28913	0.37394	0.35168	0.34489	0.24181
0.21823	0.0146	0.04485	0.07698	0.0889	0.05544	-0.02818	-0.05041	0.0544	0.17964	0.12524	-0.02922	-0.03986	0.00326	0.0122	0.07902	0.16636	0.26971	0.16965	0.00299	0.01341	0.04486	0.01301	-0.09269	-0.20113	-0.13548	0.03298	0.09086	0.04778	-0.02177	0.01016	0.11773	0.05306	-0.18486	-0.32487	-0.21494	0.00174	0.10457	0.06032	-0.01257	-0.02321	0.0472	0.17002	0.2485	0.23335	0.29527	0.38103	0.35739	0.34824	0.24497
0.21848	0.01483	0.04566	0.07805	0.08792	0.0507	-0.03467	-0.05486	0.05486	0.18399	0.13014	-0.02576	-0.03756	0.00512	0.0155	0.08285	0.16575	0.26616	0.16831	0.00555	0.01927	0.05078	0.01761	-0.09115	-0.202	-0.13357	0.03934	0.10062	0.06054	-0.00973	0.02036	0.12561	0.05066	-0.1957	-0.33147	-0.21459	0.0016	0.09996	0.05849	-0.00874	-0.0189	0.05072	0.17678	0.25885	0.24169	0.30105	0.38788	0.36307	0.35117	0.24753
0.21872	0.01515	0.04663	0.07922	0.08698	0.04612	-0.0406	-0.05841	0.05613	0.18881	0.13548	-0.02185	-0.03495	0.00736	0.01923	0.08676	0.16483	0.26208	0.16656	0.00804	0.02523	0.05687	0.0224	-0.08962	-0.20302	-0.13176	0.04543	0.10982	0.07273	0.00212	0.0308	0.13377	0.04841	-0.20643	-0.33789	-0.21404	0.00152	0.09512	0.05646	-0.0048	-0.01439	0.05451	0.18368	0.26898	0.24975	0.30653	0.3945	0.36873	0.35372	0.24948
0.21896	0.01557	0.04774	0.08049	0.08609	0.04174	-0.04593	-0.06103	0.05819	0.19405	0.14121	-0.01754	-0.03205	0.00999	0.02335	0.09069	0.1636	0.25749	0.16444	0.01049	0.0313	0.06314	0.02738	-0.08807	-0.2042	-0.13008	0.05122	0.11848	0.08437	0.0138	0.0415	0.14222	0.04634	-0.21696	-0.34407	-0.21329	0.0015	0.09008	0.05427	-0.000722956	-0.00969	0.05858	0.19074	0.27889	0.25756	0.31174	0.40092	0.37439	0.35591	0.25086
0.2192	0.01608	0.04903	0.08187	0.08528	0.0376	-0.05062	-0.0627	0.06106	0.19966	0.14724	-0.01287	-0.02885	0.01301	0.02784	0.09459	0.162	0.25239	0.16196	0.01295	0.0375	0.06956	0.03254	-0.08652	-0.20551	-0.12853	0.05673	0.12663	0.09552	0.02536	0.05247	0.15096	0.0445	-0.22723	-0.34995	-0.21231	0.00155	0.08488	0.05195	0.00349	-0.00477	0.06297	0.19799	0.28863	0.26518	0.31672	0.40714	0.38007	0.35778	0.25168
0.21945	0.01669	0.05048	0.08337	0.08457	0.03374	-0.05462	-0.06338	0.06471	0.2056	0.15352	-0.0079	-0.02537	0.01643	0.03266	0.0984	0.16002	0.24679	0.15917	0.01543	0.04385	0.07614	0.03787	-0.08494	-0.20696	-0.12713	0.06192	0.1343	0.1062	0.03683	0.06372	0.15997	0.0429	-0.23715	-0.35548	-0.21111	0.00166	0.07955	0.04954	0.00786	0.000383603	0.06768	0.20542	0.29822	0.27265	0.32153	0.41319	0.38577	0.35934	0.25197
0.21969	0.01741	0.0521	0.08499	0.08397	0.03019	-0.05791	-0.06307	0.06912	0.21179	0.15996	-0.00267	-0.0216	0.02025	0.03779	0.10208	0.15763	0.24072	0.15611	0.01797	0.05035	0.08287	0.04335	-0.08334	-0.20852	-0.12587	0.06682	0.14151	0.11645	0.04826	0.07529	0.16926	0.0416	-0.24665	-0.36058	-0.20966	0.00182	0.07411	0.04706	0.01241	0.00578	0.07274	0.21307	0.3077	0.28002	0.32619	0.41908	0.39149	0.36062	0.25177
0.21993	0.01823	0.05388	0.08672	0.08351	0.027	-0.06045	-0.06176	0.07427	0.21817	0.16647	0.00277	-0.01757	0.02447	0.04318	0.10557	0.15481	0.2342	0.15283	0.02061	0.05702	0.08973	0.04897	-0.0817	-0.21017	-0.12477	0.07141	0.1483	0.12633	0.05968	0.08717	0.17881	0.04061	-0.25564	-0.36518	-0.20794	0.00206	0.06861	0.04457	0.01714	0.01143	0.07815	0.22094	0.31708	0.28733	0.33077	0.42482	0.39723	0.36165	0.25108
0.22017	0.01915	0.05583	0.08857	0.0832	0.02419	-0.06222	-0.05945	0.08012	0.22467	0.17297	0.00834	-0.01327	0.0291	0.04881	0.10882	0.15155	0.22727	0.14938	0.02338	0.06386	0.09672	0.0547	-0.08003	-0.2119	-0.12382	0.0757	0.1547	0.13588	0.07113	0.09939	0.18862	0.03996	-0.26406	-0.36923	-0.20594	0.00235	0.06308	0.0421	0.02206	0.01735	0.08392	0.22904	0.32639	0.29463	0.33528	0.43042	0.40299	0.36245	0.24995
0.22042	0.02017	0.05792	0.09053	0.08305	0.0218	-0.0632	-0.05614	0.08662	0.23121	0.17936	0.01401	-0.00873	0.03412	0.05464	0.11179	0.14783	0.21996	0.14581	0.02632	0.07087	0.1038	0.06052	-0.07831	-0.21367	-0.123	0.0797	0.16073	0.14514	0.08266	0.11196	0.19869	0.03967	-0.27182	-0.37265	-0.20364	0.00272	0.05756	0.03969	0.0272	0.02354	0.09006	0.23737	0.33566	0.30195	0.33978	0.43588	0.40875	0.36302	0.24839
0.22066	0.02128	0.06014	0.09257	0.08308	0.01984	-0.06338	-0.05186	0.09373	0.2377	0.18555	0.0197	-0.00395	0.03952	0.06064	0.11445	0.14365	0.21233	0.14217	0.02945	0.07805	0.11097	0.06642	-0.07653	-0.21544	-0.12231	0.08342	0.16644	0.15415	0.09432	0.1249	0.209	0.03979	-0.27885	-0.37537	-0.20102	0.00316	0.0521	0.03737	0.03255	0.03	0.09656	0.24592	0.34491	0.30933	0.34429	0.44121	0.41449	0.36339	0.24645
0.2209	0.02248	0.06248	0.0947	0.0833	0.01835	-0.06275	-0.04661	0.1014	0.24407	0.19145	0.02536	0.00105	0.04529	0.06675	0.11675	0.13902	0.20442	0.13852	0.0328	0.08541	0.11821	0.07236	-0.07469	-0.2172	-0.12172	0.08687	0.17185	0.16296	0.10613	0.13822	0.21955	0.04033	-0.28507	-0.37734	-0.19807	0.00368	0.04673	0.03519	0.03811	0.03673	0.10342	0.2547	0.35415	0.31681	0.34884	0.4464	0.42021	0.36357	0.24414
0.22114	0.02374	0.06491	0.09688	0.0837	0.01733	-0.06131	-0.04043	0.10955	0.25024	0.19699	0.03094	0.00625	0.0514	0.07295	0.11867	0.13394	0.19628	0.13492	0.0364	0.09293	0.12548	0.07833	-0.07278	-0.21888	-0.12121	0.09007	0.177	0.1716	0.11815	0.15193	0.23032	0.04131	-0.29041	-0.37849	-0.19477	0.00428	0.04148	0.03317	0.04389	0.04373	0.11065	0.2637	0.36339	0.3244	0.35345	0.45144	0.42586	0.36356	0.24149
0.22139	0.02507	0.06741	0.09911	0.08431	0.01681	-0.05906	-0.03335	0.11814	0.25612	0.20206	0.03638	0.01163	0.05784	0.07919	0.12018	0.12844	0.18797	0.13142	0.04027	0.1006	0.13276	0.08429	-0.07078	-0.22046	-0.12075	0.09305	0.18191	0.18013	0.13039	0.16605	0.24131	0.04277	-0.29481	-0.37876	-0.1911	0.00497	0.03639	0.03134	0.04987	0.05098	0.11821	0.2729	0.37265	0.33212	0.35814	0.45633	0.43142	0.36337	0.23854
0.22163	0.02645	0.06995	0.10136	0.08512	0.0168	-0.05599	-0.0254	0.12709	0.26163	0.2066	0.04164	0.01718	0.06458	0.08544	0.12126	0.12252	0.17954	0.12808	0.04442	0.1084	0.14002	0.09023	-0.06867	-0.22188	-0.12031	0.09581	0.18662	0.18856	0.14289	0.18057	0.25252	0.04473	-0.29819	-0.37812	-0.18706	0.00575	0.03151	0.02973	0.05605	0.05848	0.12611	0.2823	0.38193	0.34	0.36291	0.46106	0.43687	0.36301	0.23532
0.22187	0.02787	0.0725	0.1036	0.08613	0.01731	-0.05214	-0.01663	0.13633	0.2667	0.21054	0.04667	0.02287	0.07158	0.09166	0.12191	0.11622	0.17106	0.12495	0.04888	0.11633	0.14723	0.09611	-0.06646	-0.2231	-0.11984	0.09841	0.19116	0.19694	0.15568	0.1955	0.26394	0.04721	-0.3005	-0.37652	-0.18265	0.00661	0.02684	0.02837	0.0624	0.0662	0.13433	0.29186	0.39123	0.34802	0.36779	0.46561	0.44216	0.36247	0.23185
0.22211	0.02931	0.07503	0.1058	0.08734	0.01834	-0.0475	-0.00708	0.14579	0.27128	0.21382	0.05142	0.02868	0.0788	0.09781	0.12211	0.10957	0.1626	0.12209	0.05365	0.12435	0.15436	0.10192	-0.06412	-0.22407	-0.11932	0.10086	0.19557	0.20529	0.16877	0.21084	0.27555	0.05025	-0.30169	-0.37391	-0.17786	0.00755	0.02243	0.02727	0.06891	0.07414	0.14285	0.30159	0.40055	0.35621	0.37276	0.46997	0.44728	0.36176	0.22816
0.22236	0.03075	0.07752	0.10795	0.08874	0.0199	-0.0421	0.00319	0.1554	0.27528	0.21638	0.05587	0.03458	0.08621	0.10385	0.12188	0.10261	0.1542	0.11954	0.05874	0.13246	0.16138	0.10763	-0.06164	-0.22475	-0.11869	0.10319	0.19987	0.21363	0.18218	0.22658	0.28735	0.05385	-0.30171	-0.37028	-0.17268	0.00857	0.01829	0.02643	0.07556	0.08226	0.15164	0.31145	0.40989	0.36456	0.37784	0.47413	0.45218	0.36087	0.22429
0.2226	0.03218	0.07991	0.11002	0.09034	0.02198	-0.03598	0.01412	0.16508	0.27867	0.21819	0.05998	0.04054	0.09374	0.10974	0.12121	0.09539	0.14592	0.11734	0.06416	0.14062	0.16826	0.11321	-0.05902	-0.22509	-0.11791	0.10546	0.20411	0.222	0.1959	0.24271	0.29933	0.05805	-0.30051	-0.36559	-0.16713	0.00967	0.01443	0.02587	0.08229	0.09053	0.1607	0.32142	0.41923	0.37305	0.38302	0.47807	0.45683	0.35981	0.22025
0.22284	0.03357	0.08219	0.11196	0.0921	0.02457	-0.02915	0.02564	0.17477	0.2814	0.21923	0.06374	0.04654	0.10136	0.11544	0.12012	0.08794	0.13784	0.11553	0.06992	0.14881	0.17496	0.11864	-0.05624	-0.22504	-0.11695	0.10771	0.20831	0.2304	0.20993	0.25919	0.31147	0.06286	-0.29807	-0.35985	-0.16122	0.01082	0.01087	0.02557	0.08908	0.09892	0.16998	0.33148	0.42856	0.38169	0.38828	0.48178	0.46121	0.35856	0.21609
0.22308	0.03493	0.08432	0.11376	0.09403	0.02764	-0.02166	0.03769	0.18439	0.28344	0.21947	0.06713	0.05255	0.109	0.12093	0.11863	0.08033	0.13001	0.11416	0.07601	0.157	0.18146	0.1239	-0.0533	-0.22458	-0.11575	0.10996	0.21251	0.23886	0.22426	0.27602	0.32376	0.06829	-0.29436	-0.35303	-0.15494	0.01203	0.00761	0.02553	0.09588	0.1074	0.17946	0.34159	0.43786	0.39044	0.39363	0.48526	0.46529	0.35714	0.21182
0.22333	0.03621	0.08625	0.11538	0.09609	0.03119	-0.01357	0.05018	0.19388	0.28476	0.21892	0.07012	0.05853	0.11661	0.12616	0.11677	0.0726	0.12248	0.11324	0.08243	0.16519	0.18773	0.12896	-0.0502	-0.22366	-0.11427	0.11227	0.21675	0.24738	0.23888	0.29316	0.33618	0.07435	-0.28936	-0.34515	-0.14831	0.01328	0.00464	0.02573	0.10264	0.11592	0.1891	0.35174	0.44712	0.39929	0.39905	0.48849	0.46904	0.35554	0.20747
0.22357	0.03742	0.08797	0.11679	0.09827	0.03516	-0.00493	0.06305	0.20316	0.28535	0.21757	0.07272	0.06446	0.12412	0.13111	0.11456	0.06483	0.1153	0.11281	0.08917	0.17332	0.19374	0.13381	-0.04693	-0.22226	-0.11247	0.11469	0.22106	0.25596	0.25375	0.31055	0.34871	0.08105	-0.28306	-0.33621	-0.14135	0.01457	0.00198	0.02614	0.10929	0.12443	0.19888	0.36188	0.45631	0.40821	0.40451	0.49146	0.47244	0.35375	0.20307
0.22381	0.03852	0.08943	0.11797	0.10053	0.03952	0.0042	0.0762	0.21218	0.28521	0.21546	0.07493	0.07029	0.13148	0.13575	0.11206	0.05708	0.10853	0.11288	0.09621	0.18139	0.19948	0.13844	-0.04348	-0.22034	-0.11033	0.11724	0.22546	0.26459	0.26884	0.32817	0.36133	0.08839	-0.27548	-0.32625	-0.13407	0.01588	-0.000401104	0.02673	0.11577	0.1329	0.20876	0.37198	0.46541	0.41717	0.41001	0.49416	0.47547	0.35179	0.19865
0.22405	0.03951	0.09062	0.11888	0.10285	0.04423	0.01374	0.08955	0.22087	0.28434	0.2126	0.07675	0.076	0.13864	0.14006	0.10929	0.04941	0.10222	0.11346	0.10353	0.18937	0.20493	0.14282	-0.03987	-0.21789	-0.10779	0.11998	0.22997	0.27329	0.2841	0.34595	0.37401	0.09637	-0.26661	-0.31528	-0.1265	0.0172	-0.0025	0.02748	0.12203	0.14125	0.2187	0.38202	0.47439	0.42613	0.41552	0.49659	0.47812	0.34965	0.19422
0.2243	0.04036	0.0915	0.11952	0.10519	0.04923	0.02364	0.10301	0.22919	0.28276	0.20905	0.07818	0.08156	0.14552	0.14401	0.10631	0.04189	0.0964	0.11455	0.11112	0.19723	0.21007	0.14696	-0.03609	-0.21489	-0.10485	0.12293	0.23463	0.28202	0.29948	0.36384	0.38671	0.10497	-0.25649	-0.30337	-0.11867	0.01854	-0.00432	0.02835	0.128	0.14945	0.22865	0.39196	0.48321	0.43506	0.42102	0.49874	0.48038	0.34735	0.18982
0.22454	0.04107	0.09205	0.11984	0.10752	0.05447	0.03381	0.1165	0.23708	0.2805	0.20484	0.07924	0.08692	0.15207	0.14759	0.10318	0.0346	0.09111	0.11616	0.11893	0.20494	0.21488	0.15083	-0.03214	-0.21134	-0.10147	0.12612	0.23944	0.29077	0.31492	0.38177	0.39941	0.11418	-0.24515	-0.29054	-0.1106	0.01986	-0.00587	0.02931	0.13362	0.15742	0.23858	0.40176	0.49186	0.44392	0.42648	0.50062	0.48226	0.3449	0.18547
0.22478	0.04162	0.09226	0.11984	0.10979	0.05987	0.04417	0.12992	0.24449	0.27759	0.20002	0.07995	0.09207	0.15824	0.15079	0.09994	0.0276	0.08638	0.11825	0.12694	0.21249	0.21938	0.15445	-0.02804	-0.20724	-0.09763	0.12959	0.24443	0.29952	0.33036	0.39966	0.41207	0.12399	-0.23264	-0.27687	-0.10232	0.02118	-0.00718	0.03032	0.13881	0.16512	0.24843	0.41139	0.50028	0.45267	0.43188	0.50222	0.48374	0.34231	0.18122
0.22502	0.042	0.09211	0.11951	0.11196	0.06539	0.05464	0.14319	0.25138	0.27405	0.19466	0.08031	0.09696	0.16397	0.15361	0.09665	0.02095	0.08224	0.12082	0.13511	0.21985	0.22354	0.15782	-0.02377	-0.20259	-0.09334	0.13336	0.24959	0.30824	0.34572	0.41746	0.42466	0.13436	-0.219	-0.26241	-0.09387	0.02248	-0.00825	0.03134	0.14351	0.17249	0.25816	0.42081	0.50846	0.46126	0.43719	0.50355	0.48485	0.3396	0.17708
0.22527	0.0422	0.09158	0.11882	0.114	0.07094	0.06513	0.15622	0.25772	0.26995	0.18881	0.08035	0.10157	0.16922	0.15603	0.09338	0.01473	0.0787	0.12384	0.14339	0.227	0.22739	0.16095	-0.01936	-0.1974	-0.08859	0.13743	0.25493	0.3169	0.36093	0.43507	0.43714	0.14528	-0.2043	-0.24725	-0.08528	0.02375	-0.00911	0.03233	0.14766	0.17946	0.26771	0.42997	0.51636	0.46966	0.4424	0.50461	0.48559	0.33679	0.17308
0.22551	0.04222	0.09069	0.11777	0.11587	0.07647	0.07558	0.16894	0.26347	0.26532	0.18255	0.08009	0.10588	0.17395	0.15806	0.09019	0.009	0.07577	0.12728	0.15175	0.23392	0.23092	0.16385	-0.01479	-0.19169	-0.08338	0.14182	0.26044	0.32545	0.37591	0.45241	0.44946	0.1567	-0.18862	-0.23146	-0.0766	0.02497	-0.00976	0.03325	0.15121	0.18598	0.27705	0.43885	0.52394	0.47783	0.44746	0.50542	0.48598	0.33391	0.16927
0.22575	0.04205	0.08942	0.11635	0.1175	0.0819	0.08589	0.18125	0.26862	0.26022	0.17593	0.07955	0.10985	0.17811	0.15971	0.08714	0.00382	0.07345	0.13109	0.16014	0.2406	0.23417	0.16655	-0.01007	-0.18548	-0.07772	0.14653	0.26612	0.33387	0.39058	0.46941	0.46157	0.16857	-0.17203	-0.21513	-0.06786	0.02616	-0.01022	0.03406	0.15408	0.192	0.28612	0.44741	0.53117	0.48572	0.45236	0.50597	0.48603	0.33098	0.16566
0.22599	0.04169	0.08778	0.11456	0.11888	0.08716	0.09599	0.1931	0.27314	0.2547	0.16903	0.07875	0.11347	0.18166	0.16097	0.08429	-0.000752096	0.07176	0.13524	0.1685	0.24703	0.23714	0.16908	-0.0052	-0.17879	-0.07163	0.15156	0.27195	0.3421	0.40487	0.48599	0.47344	0.18084	-0.15462	-0.19835	-0.05911	0.02729	-0.01052	0.03472	0.15623	0.19746	0.29487	0.45559	0.53801	0.49329	0.45708	0.50628	0.48578	0.32803	0.1623
0.22624	0.04115	0.08578	0.11239	0.11994	0.09218	0.1058	0.2044	0.27702	0.24882	0.16191	0.07771	0.11671	0.18459	0.16188	0.0817	-0.00466	0.07068	0.13966	0.17679	0.2532	0.23989	0.17147	-0.000168549	-0.17167	-0.06513	0.15689	0.2779	0.3501	0.41868	0.50205	0.48499	0.19346	-0.1365	-0.18122	-0.05039	0.02835	-0.01067	0.03519	0.15762	0.2023	0.30325	0.46338	0.54443	0.50051	0.46158	0.50636	0.48525	0.32509	0.15919
0.22648	0.04042	0.08342	0.10984	0.12065	0.0969	0.11525	0.2151	0.28026	0.24264	0.15464	0.07646	0.11956	0.18687	0.16243	0.07943	-0.00787	0.07019	0.14432	0.18497	0.25911	0.24243	0.17378	0.00503	-0.16413	-0.05826	0.16249	0.28394	0.35782	0.43194	0.51752	0.49618	0.20635	-0.11777	-0.16385	-0.04176	0.02935	-0.0107	0.03545	0.1582	0.2065	0.31121	0.47073	0.55041	0.50733	0.46584	0.50622	0.48447	0.32219	0.15636
[truncated: 3,190 more rows]
[truncated: 301 more columns]

## Sheet: Fig 5E Con(cKO)+Yoda1 Heatmap
Velocity Heatmap for segmented Control(cKO)+Yoda1 keratinocytes as seen in Fig. 5E
	Time(sec)
Norm. Pos	0	5	10	15	20	25	30	35	40	45	50	55	60	65	70	75	80	85	90	95	100	105	110	115	120	125	130	135	140	145	150	155	160	165	170	175	180	185	190	195	200	205	210	215	220	225	230	235	240
[truncated: 4,004 more rows]
[truncated: 301 more columns]

## Sheet: Fig 5E cKO+DMSO Heatmap
Velocity Heatmap for segmented Piezo1-cKO keratinocytes as seen in Fig. 5E
	Time(sec)
[truncated: 4,651 more rows]
[truncated: 301 more columns]
