# Supplementary material for: Spatiotemporal dynamics of PIEZO1 localization controls keratinocyte migration during wound healing
Source: eLife. 2021 Sep 27;10:e65415. doi: 10.7554/eLife.65415 (PMC8577841; doi:10.7554/eLife.65415)
Supplement: Figure 5—source data 2. — (Sheet 1) Data used to create violin plots in Figure 5D showing the instantaneous protrusion (positive) and retraction (negative) velocities at each position of the segmented cell edges for each frame of time-lapse series videos. This dataset is available on Dryad. [file elife-65415-fig5-data2.xlsx]

## Sheet: Fig 5C Con(cKO)+DMSO Boundary
X	Y	X	Y	X	Y	X	Y	X	Y	X	Y	X	Y	X	Y	X	Y	X	Y	X	Y	X	Y	X	Y	X	Y	X	Y	X	Y	X	Y	X	Y	X	Y	X	Y	X	Y	X	Y	X	Y	X	Y	X	Y
520	371	520	371	521	372	521	373	521	374	521	372	521	371	522	370	523	371	522	371	521	371	522	371	522	371	522	370	522	368	523	369	524	373	525	371	526	370	527	377	528	384	529	377	530	375	533	369	534	367
520.378	370.997	520.403	370.997	521.396	371.998	521.4	372.995	521.406	373.995	521.408	371.995	521.4	370.996	522.412	369.996	523.411	370.998	522.402	370.998	521.405	370.992	522.414	370.995	522.405	370.993	522.388	369.994	522.392	367.994	523.434	368.993	524.425	372.992	525.413	370.992	526.415	369.996	527.43	376.995	527.58	383.993	529.434	376.994	529.572	374.996	532.568	368.993	533.588	366.993
520.976	371.02	520.979	371.064	521.97	372.06	521.986	373.055	521.983	374.066	521.977	372.073	521.976	371.059	522.985	370.084	523.975	371.089	522.973	371.071	521.969	371.065	522.984	371.077	522.976	371.061	522.969	370.036	522.978	368.043	523.982	369.117	524.981	373.1	525.986	371.074	527.01	370.09	528.025	377.112	527.03	384.098	530.029	377.115	528.978	375.11	531.995	369.118	533.015	367.08
521.127	371.628	520.994	371.702	521.99	372.701	522.088	373.694	522.032	374.717	521.984	372.728	521.992	371.705	523.052	370.738	524.001	371.745	522.99	371.718	521.961	371.719	522.985	371.735	522.99	371.704	522.966	370.675	523.066	368.681	523.985	369.8	525.006	373.775	526.044	371.734	527.281	370.702	528.309	377.733	527.027	384.765	530.312	377.742	528.7	375.729	531.811	369.778	532.925	367.736
521.194	372.252	521.376	371.978	522.001	373.343	522.094	374.344	521.998	375.373	521.995	373.378	522.003	372.347	523.021	371.402	524.01	372.401	523.001	372.363	521.976	372.369	523.405	371.976	523.383	371.972	522.977	371.311	523.072	369.326	523.996	370.473	524.955	374.454	526.016	372.4	527.433	371.355	528.465	378.402	527.013	385.429	530.47	378.414	528.568	376.398	531.755	370.464	532.939	368.402
521.172	372.891	521.95	372.066	522.045	373.947	522.032	375.001	521.929	376.031	522.093	373.941	522.056	372.941	522.957	372.066	524.118	372.949	523.073	372.945	522.083	372.936	523.957	372.086	523.942	372.077	523.004	371.942	523.012	369.978	524.201	370.95	524.914	375.129	525.945	373.069	527.518	372.029	528.561	379.088	526.843	385.94	530.571	379.102	528.509	377.085	531.751	371.159	533.006	369.073
521.114	373.528	521.997	372.686	522.659	373.978	521.966	375.658	521.977	376.673	522.71	373.99	522.666	372.985	522.99	372.719	524.741	372.986	523.69	372.985	522.7	372.985	523.985	372.727	524	372.702	523.612	371.974	522.942	370.628	524.837	370.995	524.982	375.79	525.885	373.738	527.551	372.708	528.613	379.78	526.214	385.992	530.634	379.795	528.508	377.777	531.775	371.854	533.072	369.745
521.05	374.165	522.373	372.971	522.964	374.327	521.955	376.308	522.37	376.954	522.96	374.405	522.957	373.348	523.419	372.959	524.999	373.427	523.956	373.371	522.951	373.392	524.412	372.968	524.006	373.348	523.946	372.277	522.884	371.279	525.067	371.55	525.499	375.966	525.915	374.395	527.548	373.387	528.629	380.474	526.037	386.497	530.664	380.491	528.564	378.465	531.814	372.549	533.056	370.405
520.982	374.801	522.948	373.053	523.01	374.941	522.014	376.927	522.92	377.067	523.089	374.937	522.999	373.962	523.938	373.118	525.057	374.06	524.043	373.934	523.073	373.926	524.942	373.109	524.052	373.936	523.971	372.884	522.838	371.932	525.145	372.209	525.932	376.215	526.095	374.928	527.518	374.066	528.62	381.167	525.802	386.933	530.675	381.187	528.685	379.141	531.861	373.243	532.882	370.927
520.927	375.438	522.992	373.671	522.99	375.586	522.62	376.97	522.976	377.676	523.708	374.974	522.969	374.617	524.06	373.731	524.973	374.728	524.664	373.953	523.689	373.962	524.992	373.741	524.674	373.954	524.539	372.95	522.916	372.569	525.103	372.9	525.985	376.839	526.72	374.965	527.448	374.742	528.588	381.86	525.181	386.966	530.668	381.884	528.882	379.798	531.914	373.937	532.267	370.968
520.9	376.075	522.993	374.311	523.283	375.919	523.075	377.279	523.366	377.946	523.948	375.39	523.29	374.937	524.045	374.383	524.951	375.393	524.958	374.327	523.935	374.371	525.002	374.391	525.011	374.335	524.95	373.205	523.235	372.935	525.03	373.589	526.544	376.956	526.951	375.417	527.261	375.388	528.499	382.547	524.923	387.498	530.627	382.579	529.478	379.909	531.971	374.63	531.942	371.422
520.961	376.705	522.993	374.937	523.881	375.948	523.394	377.826	523.915	378.055	524.075	375.918	523.904	374.976	523.986	375.052	525.099	375.913	525.013	374.954	524.055	374.906	525.112	374.932	525.14	374.956	525.064	373.809	523.847	372.966	524.956	374.278	526.924	377.248	527	376.051	526.919	375.843	528.344	383.219	524.81	388.138	530.553	383.271	529.973	380.213	532.029	375.324	531.776	372.043
521.371	376.94	523.626	374.954	524.526	375.952	523.487	378.478	523.97	378.66	524.694	375.945	523.952	375.59	523.973	375.722	525.723	375.956	524.987	375.605	524.671	374.945	525.727	374.981	525.079	375.619	525.006	374.449	523.959	373.526	524.884	374.967	526.973	377.872	526.982	376.715	526.323	375.938	528.092	383.82	524.825	388.821	530.434	383.955	530.34	380.73	532.087	376.017	531.77	372.717
521.923	377.033	523.943	375.299	525.045	376.193	523.539	379.134	524.351	378.928	524.97	376.364	524.28	375.924	524.421	375.921	525.961	376.425	525.317	375.922	524.945	375.357	525.947	375.422	525.011	376.281	524.95	375.093	523.993	374.148	524.839	375.658	527.577	377.939	527.42	376.934	526.006	376.405	527.473	383.952	524.883	389.502	530.201	384.604	530.485	381.405	532.143	376.711	531.795	373.391
522.23	377.554	524.003	375.909	525.42	376.702	523.553	379.793	524.92	379.023	525.044	376.993	524.883	375.986	524.97	376.081	526.029	377.051	525.876	376.026	525.015	375.978	526.113	375.914	524.946	376.941	524.957	375.737	523.971	374.796	524.875	376.344	527.916	378.279	527.906	377.121	525.838	376.99	527.142	384.337	524.949	390.183	529.703	384.882	530.587	382.087	532.194	377.404	531.835	374.064
522.413	378.136	524.604	375.963	525.569	377.336	523.493	380.449	525.214	379.577	524.998	377.653	524.954	376.574	525.317	376.636	525.985	377.72	525.944	376.608	524.98	376.638	526.721	375.958	524.954	377.599	525.415	375.927	524.475	374.931	525.067	376.901	528.005	378.878	528.026	377.715	525.832	377.669	527.008	384.887	525.023	390.862	529.214	385.128	530.655	382.774	532.241	378.099	531.89	374.736
522.493	378.77	525.069	376.264	525.657	377.984	523.376	381.093	525.271	380.188	525.372	377.92	525.267	376.911	525.509	377.267	526.436	377.911	526.301	376.902	525.352	376.916	526.972	376.405	525.307	377.909	525.871	376.119	524.902	375.16	525.701	376.969	528.612	378.943	528.005	378.365	525.865	378.348	527.06	385.576	525.091	391.543	528.989	385.635	530.69	383.465	532.282	378.793	531.949	375.408
522.463	379.408	525.407	376.797	525.68	378.641	523.194	381.724	525.121	380.791	525.913	378.07	525.851	376.969	525.633	377.926	526.958	378.106	526.856	377	525.865	377.068	527.041	377.024	525.871	378.023	525.952	376.683	525.004	375.739	525.917	377.442	529.079	379.288	528.115	378.871	525.909	379.026	526.649	385.859	525.144	392.224	529.03	386.3	530.7	384.156	532.306	379.489	532.009	376.08
522.375	380.036	525.513	377.449	525.623	379.296	522.642	381.909	524.534	380.936	526.244	378.594	525.992	377.531	525.704	378.595	527.311	378.643	526.928	377.582	525.953	377.643	526.973	377.691	526.199	378.545	526.373	376.896	524.988	376.372	526.166	377.872	529.415	379.845	528.704	378.937	525.96	379.704	526.219	386.145	525.175	392.906	529.113	386.992	530.691	384.847	532.31	380.184	532.069	376.752
522.209	380.649	525.575	378.105	525.502	379.937	522.221	382.195	524.202	381.274	526.386	379.213	526.029	378.147	525.741	379.266	527.473	379.281	527.28	377.885	526.357	377.887	527.396	377.914	526.358	379.149	526.894	377.047	525.112	376.863	526.768	377.94	529.526	380.52	529.136	379.356	526.017	380.382	525.984	386.641	525.111	393.583	529.19	387.684	530.656	385.537	532.287	380.879	532.127	377.424
521.72	380.891	525.593	378.765	525.293	380.556	521.986	382.637	524.017	381.725	526.399	379.873	525.959	378.803	525.758	379.938	527.557	379.946	527.842	377.981	526.898	378.027	527.934	378.092	526.385	379.81	527.248	377.55	525.679	376.948	527.168	378.43	529.576	381.202	529.455	379.913	526.074	381.059	526.034	387.312	524.709	393.896	529.15	388.375	530.579	386.224	532.134	381.545	532.178	378.097
521.277	381.139	525.532	379.423	524.806	380.873	522.027	383.277	523.518	381.928	526.24	380.517	526.492	378.917	525.751	380.61	527.574	380.619	527.942	378.561	527.287	378.537	528.285	378.624	526.241	380.452	527.443	378.141	525.934	377.379	527.415	379.039	529.578	381.885	529.607	380.568	526.129	381.737	525.838	387.78	524.176	394.064	528.838	388.846	530.452	386.899	531.737	381.904	532.218	378.77
521.075	381.552	525.412	380.069	524.369	381.162	521.872	383.746	522.927	381.973	525.806	380.855	526.976	379.173	525.712	381.281	527.528	381.289	528.282	378.874	527.488	379.145	528.431	379.256	525.857	380.819	527.539	378.782	526.037	377.95	527.496	379.725	529.516	382.567	529.703	381.233	526.173	382.415	525.336	388.001	524.024	394.625	528.287	389.092	530.258	387.559	531.157	382.019	532.23	379.444
520.707	381.788	525.229	380.702	524.093	381.481	521.404	383.949	522.299	381.95	525.312	381.095	527.332	379.682	525.649	381.95	527.424	381.95	528.826	378.971	527.572	379.804	528.481	379.922	525.325	381.012	527.558	379.432	525.975	378.6	527.47	380.416	529.362	383.229	529.772	381.901	526.201	383.094	525.107	388.458	524.013	395.267	527.602	388.973	529.753	387.895	531.042	382.619	532.194	380.112
520.28	381.998	524.677	380.923	523.739	381.83	520.986	384.323	522.009	382.436	525.101	381.519	527.444	380.321	525.55	382.614	527.239	382.593	529.197	379.468	527.553	380.469	528.455	380.591	525.044	381.45	527.537	380.081	526.331	378.863	527.37	381.096	529.064	383.763	529.812	382.572	526.212	383.774	524.749	388.772	523.92	395.812	527.159	389.247	529.324	388.209	531.022	383.277	532.089	380.77
519.861	382.399	524.276	381.212	523.28	382.042	520.738	384.815	521.937	383.022	524.723	381.802	527.488	380.976	525.356	383.253	526.74	382.879	529.438	380.045	527.432	381.118	528.331	381.246	524.964	382.018	527.481	380.728	526.845	379.019	527.167	381.72	528.492	384	529.826	383.244	526.158	384.45	524.302	389.013	523.361	395.928	526.935	389.762	529.009	388.538	530.927	383.846	531.544	380.905
519.649	382.94	524.076	381.603	522.628	381.946	520.758	385.465	521.986	383.647	524.314	382.066	527.468	381.635	525.029	383.754	526.294	383.168	529.559	380.696	527.196	381.705	528.061	381.766	525.029	382.68	527.317	381.353	527.201	379.515	526.586	381.931	528.192	384.358	529.825	383.916	525.8	384.808	523.873	389.439	523.046	396.368	527.032	390.452	529.089	389.223	530.331	383.944	531.119	381.192
519.579	383.572	523.648	381.894	522.213	382.219	521.172	385.819	521.561	383.853	524.085	382.501	527.324	382.272	524.493	384.014	526.011	383.553	529.585	381.358	526.649	382.025	527.491	381.953	525.076	383.343	526.971	381.773	527.361	380.109	526.189	382.275	527.878	384.697	529.806	384.587	525.291	385.022	523.762	390.047	522.894	396.95	526.7	390.788	528.88	389.754	530.071	384.408	530.912	381.748
519.674	384.2	523.114	382.022	521.876	382.568	521.612	386.122	521.113	384.162	523.718	382.782	527.026	382.758	524.183	384.355	526.053	384.192	529.572	382.02	526.029	382.048	527.146	382.323	524.832	383.746	526.44	381.983	527.39	380.758	525.968	382.749	527.454	384.965	529.758	385.258	524.924	385.468	523.908	390.629	522.949	397.63	526.282	391.102	528.438	390.098	529.988	385.021	530.959	382.414
519.944	384.682	522.458	381.942	521.585	382.872	521.988	386.419	520.674	384.566	523.318	383.042	526.488	382.982	523.864	384.671	525.916	384.703	529.521	382.682	525.424	382.011	526.969	382.815	524.375	383.968	526.102	382.345	527.266	381.394	526.036	383.438	527.161	385.354	529.687	385.926	524.788	386.074	524.4	390.922	523.026	398.31	525.886	391.511	527.755	389.998	530.059	385.711	531.025	383.085
520.401	385.009	522.142	382.327	521.13	383.169	521.982	387.014	520.564	385.221	523.012	383.473	526.184	383.333	523.471	384.93	525.472	384.989	529.337	383.314	525.06	382.374	527.047	383.481	523.988	384.375	525.928	382.831	526.912	381.785	525.712	383.781	526.828	385.695	529.585	386.59	524.767	386.753	524.911	391.222	523.078	398.989	525.882	392.19	527.272	390.196	529.55	385.886	531.098	383.756
520.777	385.269	521.825	382.68	520.701	383.544	522.036	387.575	520.518	385.881	522.975	384.069	526.033	383.8	523.003	385.274	525.175	385.35	528.984	383.768	524.996	382.94	527.088	384.148	523.805	384.927	525.967	383.48	526.396	382.003	525.254	384.065	526.436	385.967	529.386	387.228	524.786	387.432	525.298	391.664	523.086	399.67	525.931	392.884	526.903	390.534	529.127	386.199	531.084	384.425
520.984	385.658	521.463	382.931	520.52	384.173	522.377	387.936	520.527	386.544	522.946	384.644	526.101	384.455	522.683	385.753	524.846	385.685	528.461	384.043	524.998	383.548	526.964	384.691	523.782	385.591	526.032	384.127	526.074	382.385	524.762	384.443	526.082	386.365	529.052	387.734	524.823	388.111	525.474	392.332	522.591	399.877	526.007	393.576	526.627	390.937	528.897	386.756	530.804	384.829
520.897	386.292	521.01	383.272	520.434	384.822	522.78	388.228	520.643	387.197	522.535	384.896	525.762	384.863	522.588	386.414	524.466	385.978	528.176	384.37	524.647	383.907	526.505	384.968	523.813	386.255	526.084	384.775	525.946	382.907	524.542	385.074	525.963	386.915	528.532	388.044	524.87	388.789	525.549	393.022	522.171	400.191	526.085	394.269	526.24	391.241	528.969	387.447	530.264	384.974
521.134	386.772	520.725	383.743	520.401	385.478	523.06	388.614	520.952	387.697	522.079	385.219	525.266	385.078	522.654	387.078	524.151	386.346	527.849	384.688	524.28	384.217	526.198	385.324	523.856	386.919	526.105	385.424	525.999	383.558	524.398	385.749	526.005	387.564	528.206	388.336	524.923	389.467	525.59	393.714	521.884	400.677	526.123	394.963	525.881	391.574	529.023	388.14	530.011	385.475
521.528	387.091	520.721	384.4	520.43	386.136	522.996	389.27	521.413	388.067	521.692	385.637	524.614	384.973	522.894	387.629	523.823	386.663	527.476	384.996	523.923	384.512	525.883	385.661	523.909	387.582	525.777	385.771	526.051	384.21	524.305	386.434	525.622	387.868	527.881	388.651	524.979	390.145	525.601	394.408	521.951	401.357	526.047	395.589	525.605	391.987	528.982	388.756	529.924	386.067
522.161	387.004	521.113	384.797	520.526	386.784	523.198	389.705	521.851	388.276	521.604	386.296	524.212	385.239	523.34	388.032	523.474	386.92	527.167	385.341	523.643	384.846	525.491	385.928	523.972	388.245	525.364	386.062	525.893	384.679	524.261	387.125	525.168	388.18	527.531	389	525.037	390.822	525.558	395.1	522.026	402.037	525.616	395.946	525.188	392.264	528.442	388.911	529.983	386.739
522.653	387.14	521.554	385.112	520.695	387.401	523.545	390.037	522.004	388.736	521.637	386.956	523.884	385.586	523.799	388.239	523.023	387.286	526.843	385.674	523.188	385.135	525.138	386.3	524.035	388.907	524.938	386.386	525.49	384.936	524.238	387.817	524.749	388.556	526.888	388.935	525.095	391.499	525.457	395.784	522.102	402.716	525.216	396.267	524.848	392.596	527.993	389.289	530.061	387.409
523.053	387.405	521.983	385.348	521.076	387.881	524.08	390.265	521.946	389.385	521.801	387.557	523.572	385.88	524.01	388.653	522.772	387.806	526.501	385.993	522.721	385.474	524.942	386.789	524.096	389.569	524.795	386.949	525.014	385.254	524.236	388.51	524.722	389.235	526.29	389.033	525.149	392.177	525.274	396.432	522.121	403.398	524.982	396.705	524.587	392.987	527.679	389.819	530.098	388.08
523.26	387.828	521.985	385.945	521.552	388.113	524.372	390.786	522.225	389.819	522.251	387.957	523.123	386.187	523.931	389.32	522.72	388.476	526.189	386.322	522.547	386.116	525.02	387.455	524.148	390.233	524.766	387.598	524.667	385.703	524.27	389.202	525.024	389.722	525.771	389.367	525.199	392.855	524.865	396.934	521.814	403.81	525.062	397.397	524.071	393.245	527.638	390.512	530.058	388.711
523.591	388.132	522.036	386.524	522.028	388.268	524.555	391.414	522.621	390.128	522.683	388.209	522.723	386.58	524.187	389.792	522.735	389.149	525.867	386.671	522.454	386.773	524.706	387.782	524.188	390.896	524.788	388.248	524.519	386.339	524.338	389.891	525.474	390.081	525.619	390.005	525.245	393.533	524.354	397.153	521.34	404.076	524.746	397.822	523.863	393.76	527.713	391.199	529.542	388.914
524.029	388.336	522.313	386.953	522.142	388.829	524.645	392.068	523.09	390.356	523.063	388.461	522.607	387.225	524.565	390.121	522.766	389.822	525.532	387.043	522.412	387.438	524.283	388.075	524.214	391.561	524.827	388.897	524.442	386.987	524.441	390.575	525.955	390.295	525.584	390.662	525.279	394.212	523.986	397.438	521.101	404.485	524.371	398.164	523.874	394.449	527.983	391.715	529.191	389.264
524.222	388.753	522.766	387.193	522.528	389.101	524.693	392.725	523.068	391.018	523.297	388.884	522.632	387.876	525.061	390.308	522.813	390.493	524.889	386.981	522.435	388.104	523.781	388.4	524.177	392.223	524.877	389.546	524.393	387.639	524.602	391.248	526.01	390.878	525.663	391.327	525.299	394.892	524.055	398.127	520.731	404.776	523.981	398.446	523.946	395.137	528.517	391.968	528.985	389.736
524.54	389.078	523.077	387.545	523.047	389.229	524.717	393.384	523.018	391.679	523.727	389.16	522.778	388.48	524.993	390.975	522.872	391.164	524.354	387.09	522.518	388.765	523.604	389.016	523.928	392.71	524.934	390.195	524.373	388.293	524.987	391.767	526.051	391.487	526.049	391.799	525.302	395.572	523.902	398.715	520.328	405.056	523.693	398.835	524.023	395.824	529.013	392.301	529.059	390.405
525.038	389.27	523.022	388.203	523.137	389.782	524.704	394.044	522.956	392.333	524.098	389.493	523.181	388.905	525.071	391.564	522.934	391.835	523.971	387.432	522.683	389.394	523.51	389.677	523.501	393.046	524.992	390.843	524.386	388.947	525.456	392.127	526.293	391.947	526.538	392.086	525.221	396.244	523.552	399.094	520.02	405.485	523.306	399.163	524.094	396.511	529.316	392.816	528.781	390.803
525.09	389.842	522.946	388.86	523.503	390.07	524.659	394.701	523.192	392.808	524.081	390.159	523.66	389.142	525.299	392.061	522.997	392.505	523.706	387.771	523.064	389.91	523.475	390.346	523.085	393.328	525.052	391.491	524.417	389.6	525.968	392.257	526.84	392.15	527.12	392.197	524.939	396.738	522.977	399.199	520.009	406.104	522.938	399.513	524.136	397.201	529.434	393.499	528.275	390.995
525.051	390.479	522.972	389.465	524.047	390.187	524.587	395.356	523.615	393.099	524.019	390.823	524.077	389.393	525.958	391.934	523.063	393.175	523.331	388.077	523.572	390.115	523.503	391.015	522.917	393.814	525.112	392.139	524.479	390.251	526.177	392.722	527.271	392.515	527.328	392.829	524.47	397.061	522.852	399.759	519.938	406.667	523.021	400.204	523.895	397.745	529.45	394.194	527.611	390.899
524.975	391.115	523.239	389.952	524.03	390.838	524.454	396.001	524.185	393.25	524.02	391.438	524.075	390.049	526.59	391.984	523.125	393.846	522.807	388.34	524.038	390.289	523.573	391.68	522.964	394.477	525.167	392.787	524.596	390.892	526.552	393.062	527.47	393.164	527.471	393.479	524.116	397.369	522.483	400.085	519.51	406.962	522.827	400.705	523.508	398.123	529.387	394.882	527.123	391.171
525.103	391.632	523.677	390.178	524.063	391.455	524.181	396.567	524.362	393.885	524.249	391.909	524.031	390.706	527.179	392.206	523.182	394.517	522.673	388.966	524.136	390.855	523.694	392.338	523.04	395.138	525.219	393.436	524.791	391.483	527.173	393.199	527.542	393.844	527.554	394.145	524.004	397.886	521.943	400.243	519.195	407.32	522.474	401.081	522.981	398.271	529.212	395.516	526.787	391.662
525.365	392.047	524.072	390.425	524.148	392.034	523.801	397.026	524.464	394.534	524.749	392.126	523.969	391.363	527.444	392.818	523.227	395.189	522.637	389.621	524.579	391.08	524.077	392.798	523.098	395.8	525.257	394.085	525.182	391.915	527.367	393.86	527.568	394.527	527.581	394.817	524.034	398.53	521.998	400.932	518.872	407.664	521.987	401.328	523.016	398.914	528.766	395.95	526.742	392.332
525.923	392.165	524.245	390.9	524.773	392.069	523.217	397.08	524.495	395.197	525.247	392.388	523.917	392.021	527.621	393.458	523.256	395.861	522.691	390.279	525.039	391.284	524.552	393.109	523.127	396.456	525.283	394.735	525.691	392.132	527.476	394.537	527.551	395.211	527.578	395.488	523.662	398.88	521.937	401.558	518.495	407.965	521.959	401.955	522.956	399.527	528.289	396.2	526.763	393.003
526.261	392.575	524.693	391.134	525.209	392.386	522.958	397.479	524.426	395.858	525.498	392.999	524.042	392.591	527.725	394.121	523.266	396.533	523.036	390.754	525.022	391.944	525.119	393.242	522.76	396.849	525.294	395.385	526.185	392.347	527.506	395.226	527.448	395.887	527.548	396.159	523.272	399.201	521.712	402.044	518.175	408.326	522.022	402.648	522.727	400.047	527.989	396.558	526.818	393.675
526.447	393.178	525.082	391.426	525.451	392.991	522.833	398.025	524.227	396.463	525.638	393.647	524.315	393.055	527.75	394.792	523.215	397.203	523.491	391.071	525.071	392.566	525.293	393.856	522.359	397.163	525.242	396.032	526.377	392.968	527.438	395.915	527.214	396.499	527.447	396.822	522.948	399.563	521.107	402.128	517.84	408.664	522.101	403.34	522.194	400.188	528.064	397.249	526.897	394.345
526.477	393.817	525.076	392.082	525.555	393.639	522.216	398.07	523.903	397.007	525.725	394.308	524.915	393.139	527.732	395.462	522.944	397.718	524.068	391.188	525.266	393.05	525.362	394.512	521.939	397.412	525.064	396.594	526.497	393.607	527.199	396.538	526.849	397.003	527.244	397.45	523.037	400.237	520.994	402.671	517.482	408.968	521.808	403.838	521.887	400.559	527.84	397.78	526.979	395.015
526.46	394.453	525.015	392.739	525.624	394.292	521.947	398.456	523.28	397.048	525.758	394.976	525.262	393.557	527.678	396.131	522.549	398.113	524.308	391.766	525.899	393.082	525.335	395.18	522.007	398.073	524.685	397.018	526.57	394.256	526.799	397	526.223	397.049	526.933	397.997	522.831	400.71	520.988	403.337	517.11	409.333	521.408	404.16	521.683	401.039	527.469	398.133	527.059	395.684
526.391	395.088	524.998	393.366	525.653	394.949	521.869	399.028	522.968	397.398	525.737	395.642	525.437	394.188	527.551	396.79	522.123	398.309	524.464	392.405	526.242	393.532	525.034	395.731	521.896	398.599	524.288	397.24	526.592	394.91	526.138	397.027	525.976	397.49	526.278	397.992	522.471	401.07	520.893	403.967	516.976	409.863	520.955	404.374	521.109	401.172	526.972	398.303	527.128	396.355
526.126	395.636	525.179	393.896	525.63	395.607	521.238	399.049	522.932	398.025	525.673	396.305	525.483	394.845	527.32	397.407	521.828	398.66	524.546	393.063	526.433	394.157	524.589	396.055	521.614	398.997	523.938	397.505	526.584	395.564	525.989	397.563	525.803	398.011	526.04	398.387	522.042	401.351	520.318	404.079	517.031	410.52	520.749	404.857	520.944	401.686	526.789	398.814	527.151	397.028
525.735	396	525.668	394.1	525.573	396.261	520.95	399.426	522.287	398.03	525.538	396.957	525.463	395.501	526.981	397.923	521.54	399.044	524.576	393.726	526.49	394.82	523.99	396.122	521.114	399.224	523.708	397.96	526.551	396.217	525.748	398.004	525.149	398.041	526.068	399.044	521.991	401.924	519.979	404.408	516.665	410.865	520.329	405.149	520.981	402.37	526.413	399.132	527.034	397.613
525.144	396.04	526.178	394.304	525.477	396.911	520.933	400.08	521.942	398.369	525.25	397.543	525.381	396.152	526.343	397.963	521.036	399.264	524.579	394.39	526.471	395.485	523.914	396.723	520.844	399.672	523.162	397.987	526.454	396.863	525.068	398.002	524.976	398.543	526.022	399.687	521.966	402.524	520.013	405.096	516.279	411.191	519.953	405.47	521.072	403.055	525.946	399.356	526.619	397.99
525.03	396.539	526.347	394.938	525.239	397.511	521.018	400.734	521.88	399.024	524.835	397.983	525.105	396.738	526.081	398.371	520.922	399.805	524.552	395.053	526.377	396.137	523.585	397.066	520.794	400.331	522.554	397.964	526.24	397.46	525.005	398.614	524.78	399.014	525.613	399.982	521.661	402.927	519.938	405.729	515.947	411.555	520.027	406.161	520.946	403.67	525.772	399.864	526.244	398.272
525.034	397.163	526.383	395.589	524.852	397.905	521.023	401.371	521.951	399.686	524.21	398.111	524.625	396.996	525.933	398.89	520.973	400.476	524.465	395.71	526.126	396.745	522.965	397.111	520.833	400.996	522.06	398.22	525.923	398.01	524.699	398.99	524.104	398.997	524.983	400.05	521.223	403.208	519.549	406.038	516.033	412.233	519.862	406.719	520.62	404.082	525.338	400.135	525.902	398.569
525.003	397.79	526.316	396.233	524.247	397.973	520.947	401.981	522.023	400.347	523.56	398.049	524.009	397.02	525.325	398.961	521.054	401.144	524.296	396.337	525.603	396.946	522.911	397.709	520.885	401.659	521.945	398.745	525.305	398.034	524.02	399.004	523.447	399.011	524.322	400.003	520.925	403.599	518.993	406.167	515.829	412.711	519.525	407.104	520.029	404.158	524.959	400.446	525.605	398.937
524.579	397.998	526.054	396.818	524.09	398.467	520.334	402.017	522.096	401.008	523.089	398.155	524.007	397.664	525.081	399.384	520.887	401.668	524	396.915	525.112	397.118	522.573	398.034	520.948	402.321	521.963	399.363	524.977	398.347	523.352	399.005	523.018	399.259	524.058	400.386	520.976	404.275	519.015	406.843	515.468	413.073	518.993	407.254	519.892	404.697	525.025	401.135	525.2	399.239
524.017	398.057	525.538	397.007	523.84	398.868	520.02	402.356	522.034	401.654	523.059	398.773	523.674	397.98	524.914	399.885	520.563	402.063	523.412	397.004	525.067	397.708	521.946	398.079	521.019	402.982	521.786	399.834	524.966	398.976	523.036	399.371	522.977	399.901	523.914	400.905	521.046	404.951	518.992	407.513	515.044	413.358	518.819	407.763	519.562	405.052	524.879	401.717	524.961	399.669
524.004	398.674	525.02	397.129	523.276	398.958	520.001	402.992	521.682	401.98	522.553	398.942	523.05	398.009	524.325	399.991	520.031	402.23	523.001	397.249	525.061	398.345	521.834	398.735	521.086	403.644	521.386	400.106	524.375	399.023	522.911	399.938	522.396	400	523.309	400.957	520.977	405.545	518.801	408.023	515.002	413.938	518.454	408.1	518.96	405.145	524.547	402.106	525.038	400.339
523.672	398.978	525.03	397.781	523.1	399.43	519.989	403.637	521.044	401.988	521.92	398.978	523.007	398.632	523.681	399.985	519.887	402.784	522.979	397.897	524.929	398.881	521.789	399.398	521.15	404.307	520.89	400.295	524	399.29	522.273	399.989	521.991	400.312	523.077	401.386	520.683	406.013	518.137	408.03	514.971	414.542	517.926	408.283	518.942	405.827	523.996	402.229	524.78	400.778
523.067	399.012	525.008	398.422	522.866	399.844	519.686	403.984	520.975	402.63	521.266	398.963	522.684	398.965	523.139	400.07	519.885	403.452	523.041	398.554	524.336	399.03	521.806	400.068	521.195	404.97	520.879	400.943	523.968	399.906	522.028	400.443	521.871	400.953	522.917	401.887	520.204	406.219	517.986	408.557	514.654	414.963	518	408.975	518.984	406.511	523.838	402.764	524.417	401.119
523.008	399.598	524.88	398.966	522.31	399.938	519.06	404	520.982	403.281	521.031	399.434	522.078	399.005	523.054	400.664	519.951	404.122	523.069	399.206	523.694	399.015	521.86	400.736	521.212	405.634	520.911	401.591	523.403	399.965	521.988	401.095	521.939	401.634	522.31	401.943	519.97	406.621	517.732	408.986	514.253	415.238	517.921	409.583	519.048	407.191	523.483	403.099	523.961	401.359
522.735	399.966	524.26	399.002	522.113	400.394	518.974	404.603	521.064	403.942	520.96	400.044	521.876	399.594	522.612	400.889	520.024	404.792	523.007	399.843	523.165	399.092	521.922	401.404	521.203	406.298	520.978	402.238	522.77	399.971	522.019	401.781	522.016	402.315	522.091	402.388	520.058	407.295	517.056	408.998	513.892	415.543	517.67	410.055	518.931	407.828	522.963	403.266	524.006	401.994
522.136	400.004	524.023	399.418	521.894	400.831	518.976	405.243	521.025	404.588	521.033	400.706	521.774	400.221	522.154	401.095	520.088	405.462	522.477	399.978	523.048	399.648	521.99	402.071	520.9	406.813	521.055	402.884	522.136	400.002	521.512	401.947	522.088	402.995	521.915	402.88	519.824	407.798	516.387	409.017	513.635	415.956	517.089	410.17	518.457	408.059	522.836	403.828	523.932	402.563
522.024	400.521	523.917	399.962	521.347	400.943	519.061	405.897	520.708	404.943	520.576	400.904	521.776	400.881	522.065	401.674	520.128	406.133	522.052	400.215	522.619	399.869	522.061	402.739	520.495	407.129	521.117	403.532	521.983	400.525	521.067	402.194	522.035	403.667	521.307	402.95	519.455	408.128	516.018	409.336	513.192	416.23	516.991	410.726	517.96	408.244	522.422	404.105	523.654	403.004
521.832	400.955	523.287	399.977	521.12	401.369	519.044	406.543	520.102	404.996	520.153	401.149	521.82	401.539	521.612	401.903	519.936	406.694	522.003	400.836	522.17	400.083	522.124	403.406	519.983	407.239	521.163	404.18	521.958	401.15	520.989	402.832	521.626	403.95	521.083	403.402	518.971	408.306	515.963	409.969	512.965	416.672	516.977	411.386	517.96	408.925	521.945	404.321	523.19	403.231
521.226	400.972	523.041	400.377	520.908	401.808	518.774	406.936	520.028	405.592	520.049	401.712	521.873	402.197	521.017	401.976	519.583	407.08	522.012	401.487	521.993	400.631	522.179	404.075	519.84	407.769	520.953	404.736	522.007	401.789	521.017	403.509	521.075	404.078	520.88	403.87	518.8	408.817	515.308	409.987	513.039	417.35	516.835	411.985	518.028	409.61	521.835	404.91	522.977	403.662
521.047	401.419	522.958	400.942	520.381	401.93	518.156	406.971	520.009	406.223	519.571	401.875	521.937	402.854	520.352	401.935	519.014	407.179	521.822	401.936	522.002	401.263	522.201	404.745	519.516	408.105	520.599	405.094	521.543	401.963	520.748	403.904	520.972	404.702	520.301	403.949	518.432	409.125	514.989	410.383	512.78	417.81	516.27	412.119	518.054	410.284	521.354	405.12	523.052	404.331
520.935	401.935	522.33	400.964	520.137	402.34	518.045	407.525	520.04	406.884	519.115	402.113	522.006	403.511	520.044	402.364	518.925	407.767	521.198	401.952	521.923	401.791	522.115	405.391	518.993	408.228	520.056	405.165	521.068	402.144	520.137	403.983	521.001	405.365	520.061	404.404	517.949	409.313	514.927	411.045	512.395	418.136	515.963	412.479	517.962	410.933	520.926	405.38	522.805	404.816
520.333	401.964	522.037	401.348	519.934	402.788	517.782	407.925	519.44	406.938	518.864	402.675	522.073	404.168	519.927	402.955	518.947	408.434	520.996	402.466	521.391	401.918	521.913	405.971	518.857	408.773	519.9	405.655	521.011	402.751	520.033	404.598	521.067	406.044	519.983	405.004	517.8	409.838	515.017	411.733	511.929	418.364	516.013	413.168	517.373	411.025	520.83	405.973	522.44	405.142
520.022	402.331	521.974	401.975	519.413	402.905	517.18	407.984	519.078	407.248	518.846	403.324	522.137	404.825	520.023	403.621	519.022	409.103	520.949	403.1	521.071	402.334	521.296	406.012	518.475	409.04	519.65	406.057	521.012	403.388	520.01	405.253	521.06	406.719	520.042	405.672	517.419	410.128	515.036	412.415	512.013	419.042	515.905	413.775	516.996	411.329	520.29	406.121	521.973	405.324
519.914	402.925	522.003	402.627	519.114	403.295	517.047	408.51	518.99	407.852	518.889	403.991	522.188	405.483	519.618	403.834	519.087	409.773	521.033	403.758	520.9	402.883	521.034	406.402	517.815	408.994	519.081	406.14	520.915	403.919	519.96	405.859	520.574	406.921	519.604	405.891	516.956	410.336	514.857	412.923	511.904	419.606	515.49	414.062	516.954	411.977	519.926	406.441	521.783	405.809
519.995	403.56	521.669	402.929	518.962	403.839	516.8	408.913	519.02	408.506	518.959	404.656	522.223	406.141	519.162	404.076	519.051	410.413	521.041	404.412	520.958	403.548	521.022	407.04	517.156	408.906	518.911	406.624	520.311	403.959	519.358	405.953	520.125	407.159	519.153	406.122	516.808	410.875	514.215	412.97	511.626	420.052	514.953	414.223	516.311	412.024	519.824	407.02	521.435	406.13
520.036	404.194	521.104	403.015	519.031	404.493	516.213	408.961	518.763	408.891	519.034	405.32	522.236	406.801	518.847	404.603	518.869	411.008	520.857	404.89	521.035	404.211	521.015	407.702	516.537	408.954	518.699	407.049	520.08	404.37	519.106	406.384	520.041	407.762	519.008	406.685	516.303	410.99	514.037	413.505	511.115	420.234	514.913	414.911	516.008	412.412	519.218	407.11	520.974	406.334
520.032	404.826	520.955	403.603	518.733	404.823	515.977	409.458	518.182	408.978	519.103	405.985	522.142	407.448	518.791	405.252	518.294	411.099	520.271	404.962	521.097	404.874	520.622	407.971	515.963	409.153	518.053	406.994	519.964	404.896	518.888	406.847	519.519	407.925	519.022	407.33	515.65	410.964	513.997	414.162	510.99	420.745	514.963	415.602	515.984	413.076	518.986	407.547	520.789	406.838
519.51	404.933	520.928	404.23	518.253	405.007	515.881	410.066	518.072	409.528	519.158	406.651	521.862	407.897	518.802	405.923	517.951	411.418	520.053	405.43	521.101	405.539	520.051	408.058	515.949	409.787	517.454	407.043	519.362	404.951	518.3	406.951	519.128	408.213	518.881	407.826	515.073	411.15	514.027	414.849	511.003	421.393	515.043	416.294	515.992	413.757	519.005	408.227	520.324	407
519.09	405.164	520.996	404.888	518.007	405.499	515.937	410.723	517.761	409.868	519.134	407.315	521.272	407.987	518.846	406.595	517.954	412.087	519.984	406.026	520.711	405.856	520.033	408.698	515.929	410.412	516.968	407.222	519.098	405.328	518.112	407.441	519.041	408.793	518.331	407.962	514.952	411.693	513.439	414.937	510.787	421.92	515.113	416.987	515.552	413.984	518.906	408.863	519.669	406.943
518.957	405.724	521.073	405.545	517.954	406.088	516.012	411.378	517.203	409.953	518.917	407.807	521.11	408.458	518.908	407.264	518.031	412.755	520.043	406.686	520.281	406.125	519.626	408.946	515.88	411.008	516.908	407.807	519.058	405.919	517.841	407.867	518.49	408.959	518.13	408.415	514.952	412.336	513.055	415.274	510.345	422.162	515.004	417.631	515	414.124	518.428	409.083	519.12	407.162
518.993	406.342	521.097	406.202	518.028	406.742	516.066	412.034	517.003	410.492	518.373	407.984	520.872	408.864	518.974	407.934	518.017	413.396	519.605	406.88	520.074	406.563	519.062	409.043	515.292	411.077	516.48	407.935	519.066	406.563	517.249	408.016	517.863	408.998	517.863	408.819	514.851	412.908	512.921	415.893	509.924	422.406	514.658	418.022	514.877	414.79	517.951	409.286	518.949	407.655
519.06	406.976	521.059	406.844	518.065	407.396	516.062	412.69	516.938	411.096	518.144	408.409	520.299	408.98	519.044	408.603	517.895	414.004	519.118	407.083	519.677	406.811	519.007	409.685	514.972	411.406	515.851	407.839	518.757	406.971	516.572	407.975	517.197	408.945	517.34	409.014	514.354	413.091	513.01	416.581	509.767	422.921	514.021	418.066	514.888	415.474	517.9	409.917	518.983	408.305
519.067	407.609	520.473	406.939	517.808	407.795	515.612	412.893	517.017	411.757	517.854	408.761	519.665	408.967	519.106	409.273	517.29	414.066	518.867	407.646	519.271	407.074	519	410.335	514.988	412.065	515.238	407.976	518.184	407.18	516.148	408.215	517.08	409.528	516.693	408.976	513.952	413.368	513.052	417.268	509.29	423.143	513.954	418.701	514.95	416.162	517.359	410.063	518.833	408.85
518.703	407.886	520.142	407.268	517.328	408	515.124	413.091	517.057	412.419	517.367	408.913	519.153	409.098	519.157	409.943	516.97	414.417	518.821	408.286	518.996	407.53	518.927	410.901	514.933	412.678	514.857	408.381	517.534	407.121	516	408.772	516.716	409.848	516.208	409.121	513.946	414.04	512.953	417.846	508.953	423.482	513.577	419.021	515.031	416.849	516.983	410.364	518.427	409.115
518.19	408.021	520.045	407.813	517.072	408.44	514.89	413.643	516.825	412.831	517.064	409.361	518.969	409.645	519.193	410.615	516.951	415.074	518.846	408.949	518.992	408.146	518.323	410.967	514.624	413.032	514.656	408.99	516.885	407.043	515.463	408.9	516.209	410.013	516.032	409.646	514.02	414.714	512.349	417.936	509.009	424.161	512.998	419.138	515.096	417.537	517.009	411.052	517.955	409.304
518.081	408.548	519.481	407.908	516.992	408.991	514.855	414.275	516.268	412.943	516.917	409.918	518.992	410.275	519.162	411.285	517.036	415.742	518.902	409.61	518.924	408.684	518.072	411.384	514.015	413.077	514.613	409.638	516.238	406.946	515.119	409.273	516.075	410.57	515.588	409.844	514.023	415.369	512.082	418.391	508.868	424.719	512.948	419.807	515.104	418.223	516.947	411.697	517.837	409.855
517.752	408.85	519.141	408.231	517.073	409.644	514.895	414.933	516.03	413.451	516.986	410.582	518.913	410.793	518.921	411.764	517.034	416.395	518.968	410.271	518.48	408.894	517.914	411.891	513.848	413.68	514.602	410.287	515.587	406.918	514.951	409.837	515.68	410.85	515.203	410.136	513.896	415.994	511.994	419.005	508.527	425.079	512.994	420.491	515.041	418.905	516.579	412.031	517.414	410.102
517.233	408.956	519.031	408.786	516.615	409.849	514.96	415.59	515.941	414.038	517.039	411.247	518.389	410.939	518.408	411.987	516.932	417.01	519.037	410.931	518.091	409.27	517.321	411.96	513.771	414.326	514.621	410.937	515.155	407.143	515.027	410.525	515.207	411.057	514.963	410.636	513.304	416.076	512.047	419.694	507.95	425.193	513.052	421.181	514.406	418.949	515.982	412.129	516.946	410.306
517.052	409.459	518.5	408.901	516.225	410.159	515.023	416.247	516.015	414.699	516.889	411.734	518.146	411.354	518.089	412.384	516.295	417.026	519.104	411.591	517.815	409.761	517.078	412.382	513.777	414.991	514.669	411.586	515.011	407.696	514.675	410.827	515.001	411.591	515.008	411.288	512.97	416.394	511.559	419.893	507.899	425.848	513.004	421.865	514.041	419.304	515.951	412.791	516.845	410.877
516.98	410.023	518.135	409.212	515.909	410.584	515.072	416.904	516.05	415.36	516.412	411.931	517.914	411.769	517.956	412.91	515.998	417.398	519.154	412.253	517.792	410.426	516.906	412.872	513.818	415.655	514.726	412.234	514.562	407.848	514.195	411.063	515.002	412.232	514.848	411.753	513.009	417.07	511.148	420.195	507.92	426.525	512.446	421.991	513.933	419.936	515.506	413.03	516.384	411.098
517.053	410.658	517.962	409.745	515.955	411.23	515.07	417.562	515.84	415.795	516.047	412.339	517.411	411.901	518.029	413.579	515.975	418.056	519.172	412.914	517.822	411.092	516.328	412.936	513.868	416.318	514.794	412.881	514.146	408.106	513.874	411.585	514.914	412.767	514.369	411.943	512.948	417.694	510.965	420.751	507.992	427.205	512.014	422.24	514.015	420.623	514.956	413.176	515.943	411.323
516.629	410.855	518.024	410.397	516.015	411.885	514.701	417.844	515.325	415.944	515.83	412.864	517.117	412.306	518.073	414.248	515.971	418.714	519.111	413.57	517.872	411.758	516.015	413.357	513.928	416.981	514.867	413.528	513.839	408.611	513.823	412.246	514.385	412.914	514.047	412.383	512.601	418.027	511.031	421.436	508.062	427.885	512.009	422.925	514.044	421.306	514.872	413.859	516.002	411.993
516.197	411.081	517.821	410.816	516.074	412.54	514.187	418.015	515.013	416.403	515.824	413.531	516.963	412.846	517.879	414.725	515.598	418.997	518.704	413.862	517.936	412.423	515.87	413.954	513.992	417.643	514.941	414.174	513.783	409.242	513.853	412.937	514.059	413.358	513.898	412.936	511.995	418.096	510.767	421.828	507.992	428.515	512	423.598	513.922	421.865	514.899	414.549	515.936	412.6
515.971	411.579	517.289	410.947	515.686	412.81	513.783	418.479	514.853	416.962	515.872	414.197	517.032	413.502	517.431	414.996	514.996	419.069	518.237	414.092	518.002	413.087	515.924	414.622	514.055	418.305	515.014	414.821	513.789	409.895	513.914	413.627	513.901	413.93	513.949	413.605	511.938	418.753	510.243	422.002	507.768	429.047	511.673	423.959	513.319	421.942	514.968	415.241	515.695	413.044
515.96	412.176	517.066	411.437	515.269	413.103	513.54	419.058	514.87	417.626	515.931	414.863	516.713	413.819	517.094	415.373	514.701	419.65	517.997	414.563	518.068	413.752	515.996	415.288	514.115	418.968	515.079	415.468	513.832	410.547	513.99	414.316	513.964	414.613	514.029	414.273	511.957	419.42	509.998	422.531	507.139	429.099	511.067	424.05	513.014	422.404	515.054	415.931	515.096	413.11
516.027	412.812	516.978	412.011	514.86	413.474	513.392	419.699	514.932	418.289	515.998	415.528	516.26	414.041	516.967	415.898	514.525	420.283	517.988	415.169	518.129	414.417	516.06	415.954	514.163	419.631	515.134	416.117	513.891	411.199	514.063	415.005	514.046	415.293	514.085	414.942	512.026	420.095	509.966	423.164	506.848	429.555	511.015	424.692	512.887	423.022	515.12	416.624	514.99	413.651
516.061	413.448	517.044	412.668	514.788	414.099	513.31	420.353	514.998	418.951	516.059	416.194	515.985	414.512	517.032	416.558	514.436	420.948	518.06	415.829	518.172	415.083	516.066	416.622	514.194	420.295	515.168	416.766	513.957	411.85	514.133	415.694	514.097	415.974	514.111	415.612	511.993	420.763	510.036	423.854	506.757	430.228	510.59	424.939	512.94	423.711	515.105	417.309	514.982	414.305
515.785	413.806	516.589	412.856	514.78	414.756	513.252	421.01	515.065	419.613	516.096	416.86	515.942	415.106	516.645	416.832	514.423	421.62	518.1	416.49	518.19	415.749	515.65	416.87	514.204	420.96	515.111	417.407	514.027	412.5	514.179	416.385	514.107	416.655	513.647	415.874	511.57	421.014	510.075	424.544	506.753	430.911	509.939	424.95	513.017	424.398	514.986	417.971	514.906	414.931
515.306	413.983	516.166	413.139	514.809	415.414	513.213	421.669	515.076	420.276	516.1	417.527	516.014	415.762	516.199	417.134	514.46	422.291	517.754	416.833	518.158	416.414	515.154	417.072	514.089	421.608	514.916	417.921	514.093	413.151	514.176	417.075	513.609	416.898	513.255	416.194	510.964	421.101	509.675	424.85	506.776	431.594	509.252	424.95	513.091	425.085	514.323	417.985	514.37	415.065
515.039	414.43	515.852	413.615	514.857	416.071	513.199	422.328	514.878	420.744	515.7	417.821	516.069	416.418	515.718	417.476	514.55	422.954	517.307	417.086	517.801	416.811	514.886	417.609	513.744	421.976	514.314	417.95	514.152	413.803	514.066	417.698	513.243	417.23	512.949	416.584	510.671	421.697	509.238	425.138	506.813	432.277	508.967	425.439	513.157	425.774	514.039	418.378	513.942	415.314
514.931	414.966	515.818	414.258	514.912	416.727	513.201	422.988	514.404	420.949	515.242	418.109	515.787	416.779	515.596	418.135	514.777	423.58	517.091	417.509	517.38	417.132	514.822	418.246	513.102	421.971	514.015	418.354	514.192	414.456	513.541	417.954	512.996	417.642	513.029	417.251	510.565	422.348	508.986	425.616	506.865	432.958	508.891	426.097	513.108	426.455	513.932	418.949	513.899	415.977
515.003	415.602	515.838	414.918	514.973	417.382	513.217	423.647	513.953	421.316	514.758	418.44	515.328	417	515.539	418.801	515.245	423.885	516.722	417.783	517.002	417.432	514.84	418.915	512.959	422.561	513.894	418.949	514.173	415.106	513.2	418.31	512.552	417.874	512.848	417.711	510.593	423.017	509.027	426.282	506.922	433.64	508.988	426.787	512.783	426.859	513.268	418.967	513.956	416.646
515.058	416.239	515.891	415.577	515.032	418.038	513.265	424.305	513.627	421.807	514.571	419.061	514.995	417.431	515.539	419.472	515.75	424.098	516.31	418.034	516.988	418.024	514.894	419.584	512.929	423.21	513.957	419.597	514.06	415.692	512.896	418.662	512.193	418.232	512.432	417.987	510.793	423.653	508.848	426.757	506.982	434.321	509.036	427.475	512.246	427.041	513.025	419.439	514.029	417.317
514.934	416.721	515.956	416.236	515.086	418.694	513.34	424.961	513.474	422.452	514.451	419.715	514.879	418	515.636	420.137	515.912	424.572	515.997	418.469	516.935	418.58	514.957	420.252	512.996	423.872	514.022	420.244	513.572	415.924	512.484	418.89	511.946	418.708	512.06	418.363	511.299	423.947	508.356	426.973	507.043	435.002	508.775	427.885	512.102	427.548	512.981	420.105	514.101	417.987
514.472	416.908	516.02	416.895	515.13	419.351	513.44	425.612	513.405	423.112	514.386	420.38	514.909	418.658	515.93	420.66	516.313	424.836	515.945	419.057	516.592	418.895	515.024	420.919	513.064	424.534	514.084	420.891	513.218	416.251	512.004	419.249	512.037	419.387	511.92	418.899	511.928	424.045	508.063	427.429	507.104	435.683	508.166	427.975	511.714	427.871	513.008	420.79	514.022	418.635
514.111	417.272	516.079	417.554	515.14	420.009	513.615	426.248	513.369	423.776	514.376	421.047	514.98	419.314	516.37	421.057	516.747	425.08	516.015	419.717	516.106	419.186	515.091	421.586	513.081	425.19	514.057	421.533	512.977	416.661	511.639	419.744	511.762	419.779	511.972	419.568	512.595	423.94	507.98	428.018	507.162	436.364	508.06	428.578	511.156	428.031	512.49	420.946	513.698	419.015
513.854	417.735	516.089	418.214	515.039	420.583	513.958	426.736	513.368	424.44	514.396	421.714	515.051	419.971	516.892	421.222	516.943	425.567	516.077	420.377	515.689	419.582	515.15	422.255	513.028	425.838	513.752	421.891	513.047	417.311	511.484	420.417	511.344	420.07	512.038	420.237	512.926	424.342	507.99	428.646	507.215	437.046	507.678	428.881	510.47	427.951	512.048	421.221	513.052	419.02
513.869	418.373	515.928	418.719	514.641	420.911	514.444	427.094	513.42	425.103	514.448	422.38	515.116	420.627	517.098	421.698	517.336	425.809	515.802	420.773	515.502	420.22	515.198	422.923	512.478	425.946	513.195	421.99	512.838	417.747	511.433	421.106	511.01	420.469	511.847	420.703	513.065	424.919	507.538	428.859	507.258	437.728	507.129	429.038	510.147	428.319	511.892	421.841	512.969	419.637
513.914	419.011	515.463	418.932	514.162	421.185	514.82	427.313	513.515	425.759	514.582	423.033	515.119	421.285	517.099	422.369	517.795	426.033	515.381	421.057	515.397	420.877	515.226	423.593	512.057	426.219	512.971	422.476	512.417	418.021	511.428	421.797	510.989	421.084	511.455	421.016	512.984	425.594	507.106	429.222	507.292	438.411	506.741	429.56	509.867	428.74	511.952	422.53	512.983	420.302
513.977	419.648	514.992	419.265	513.73	421.521	515.143	427.604	513.662	426.406	514.846	423.597	514.878	421.734	517.044	423.039	518.24	426.472	515.063	421.425	515.328	421.54	515.169	424.256	511.891	426.807	513.098	422.817	512.143	418.383	511.469	422.487	510.918	421.646	510.938	421.297	512.93	426.27	506.775	429.717	507.315	439.094	506.545	430.198	509.389	428.918	512.027	423.222	513.067	420.971
514.042	420.284	514.617	419.713	513.571	422.158	515.413	427.966	514.089	426.841	515.27	424.047	514.437	422.013	516.984	423.709	518.45	427.077	515.005	421.984	515.297	422.207	514.951	424.776	511.924	427.462	513.647	422.973	511.823	418.692	511.605	423.165	510.517	421.94	510.673	421.808	513.098	426.77	506.723	430.408	507.291	439.778	506.451	430.885	509.101	429.367	512.099	423.913	513.01	421.619
514.081	420.922	514.443	420.349	513.475	422.807	515.948	428.205	514.528	427.158	515.746	424.203	514.084	422.364	516.925	424.379	518.56	427.738	515.009	422.59	515.303	422.874	514.427	424.986	511.987	428.124	513.843	423.407	511.458	418.948	511.938	423.705	510.046	422.268	510.593	422.471	513.612	426.989	506.725	431.102	507.151	440.427	506.426	431.581	508.981	429.941	512.077	424.604	512.676	421.973
514.094	421.56	514.349	421.002	513.414	423.462	516.303	428.634	514.941	427.33	516.088	424.506	513.945	422.874	516.886	425.051	518.597	428.409	514.615	422.905	515.333	423.54	514.163	425.376	512.064	428.785	514.123	423.78	511.09	419.318	512.402	424.108	509.753	422.737	510.649	423.138	513.827	427.405	506.75	431.795	506.881	440.99	506.469	432.275	509.059	430.626	511.67	424.904	512.053	422.017
513.693	421.837	514.292	421.659	513.393	424.119	516.458	429.272	515.187	427.785	516.262	425.01	514.007	423.53	517.043	425.619	518.571	429.081	514.27	423.231	515.397	424.204	513.871	425.726	512.126	429.447	514.598	424.011	510.91	419.815	512.877	424.268	509.756	423.418	510.932	423.673	514.139	427.783	506.793	432.488	506.245	441.023	506.573	432.959	508.597	430.881	511.156	425.094	512.014	422.648
513.261	422.118	514.282	422.321	513.396	424.777	516.488	429.929	515.586	428.044	516.763	425.18	514.065	424.188	517.36	426.059	518.495	429.747	513.95	423.557	515.528	424.856	513.413	425.917	512.136	430.106	515.216	423.985	510.961	420.466	513.16	424.657	510.166	423.808	511.359	424.085	514.607	428.09	506.845	433.18	506.002	441.453	506.747	433.631	508.234	431.222	511.041	425.68	512.008	423.3
512.804	422.422	514.328	422.979	513.418	425.435	516.463	430.585	516.245	427.958	517.111	425.485	513.903	424.675	517.965	426.155	518.348	430.402	513.618	423.85	515.746	425.46	513.077	426.334	512.068	430.758	515.73	424.074	511.027	421.117	513.461	425.057	510.657	424.107	511.843	424.237	515.276	428.022	506.902	433.872	505.863	441.99	507.298	433.902	507.974	431.651	511.041	426.343	512.008	423.944
512.65	422.999	514.417	423.632	513.476	426.09	516.376	431.237	516.756	428.156	517.258	425.971	513.512	424.987	518.293	426.626	517.918	430.833	513.233	424.172	516.118	425.968	512.893	426.867	511.551	430.927	515.947	424.538	510.925	421.638	514.008	425.248	511.202	424.333	512.132	424.604	515.951	427.956	506.962	434.563	505.204	441.997	507.739	434.218	507.536	431.869	510.869	426.856	511.363	423.955
512.601	423.628	514.58	424.271	513.575	426.739	516.034	431.759	517.117	428.477	517.833	426.122	513.104	425.299	518.471	427.268	517.473	431.157	512.875	424.552	516.645	426.117	512.945	427.534	511.159	431.202	516.32	424.809	510.56	421.958	514.083	425.854	511.346	425.001	512.374	425.035	516.615	427.919	507.025	435.254	505.02	442.474	508.035	434.613	507.091	432.208	510.287	427.024	511.023	424.316
512.68	424.26	514.957	424.761	513.724	427.367	515.589	432.088	517.274	428.938	518.255	426.485	512.902	425.771	518.544	427.935	517.115	431.366	512.906	425.214	517.051	426.357	513.026	428.2	511.046	431.73	516.698	425.071	510.096	422.239	514.04	426.543	511.425	425.677	512.904	425.207	516.91	428.376	507.086	435.946	505.021	443.136	507.968	435.306	506.722	432.667	509.611	426.97	510.94	424.958
512.998	424.728	515.451	425.079	514.085	427.847	515.024	432.16	517.804	429.128	518.477	427.109	512.943	426.429	518.56	428.606	516.826	431.821	512.969	425.874	517.15	426.928	513.088	428.866	510.553	431.896	516.934	425.501	509.77	422.638	513.96	427.231	511.442	426.361	513.057	425.715	517.241	428.72	507.145	436.637	505.008	443.794	508.216	435.743	506.731	433.354	509.135	427.184	511.028	425.627
513.41	425.094	516.098	425.035	514.572	428.099	515.021	432.758	518.241	429.465	518.558	427.771	513.02	427.084	518.536	429.277	516.404	432.144	513.046	426.533	517.676	427.08	513.112	429.535	510.17	432.176	517.283	425.764	509.748	423.288	514.151	427.766	511.367	427.04	513.02	426.382	517.611	428.984	507.2	437.329	504.499	443.974	508.644	436.056	507.098	433.778	508.916	427.747	511.05	426.291
513.814	425.265	516.667	425.126	515.127	428.224	515.005	433.382	518.453	430.087	518.596	428.436	513.083	427.741	518.449	429.943	515.734	432.172	513.093	427.194	518.168	427.329	512.703	429.858	510.039	432.71	517.689	425.985	510.063	423.728	514.561	428.087	511.106	427.619	512.937	427.049	518.089	429.343	507.243	438.022	503.849	444.005	509.158	436.376	507.575	434.097	509.016	428.436	510.963	426.888
514.102	425.626	517.067	425.388	515.326	428.844	514.871	433.955	518.506	430.746	518.589	429.104	513.125	428.398	518.198	430.545	515.063	432.124	512.893	427.684	518.423	427.932	512.313	430.171	509.56	432.882	518.146	426.366	510.502	424.057	515.15	428.234	510.698	428.063	513.061	427.636	518.279	429.895	507.273	438.715	503.182	443.985	509.35	436.986	507.988	434.393	508.748	428.811	510.362	426.962
514.322	426.1	517.016	426.047	515.451	429.483	514.348	434.092	518.494	431.408	518.494	429.764	512.793	428.805	517.805	430.981	514.393	432.058	512.526	428.051	518.531	428.584	512.049	430.543	509.129	433.148	518.418	426.9	511.051	424.231	515.369	428.883	510.108	428.149	513.346	428.09	518.223	430.526	507.28	439.409	503.008	444.52	509.393	437.671	508.001	435.017	508.254	429.015	510.09	427.356
514.958	426.052	517.105	426.606	515.512	430.138	513.95	434.351	518.414	432.067	518.296	430.385	512.408	429.135	517.169	431.014	513.724	431.979	512.091	428.306	518.584	429.248	511.665	430.828	508.851	433.645	518.569	427.53	511.345	424.736	515.475	429.558	509.933	428.664	513.898	428.189	517.769	430.926	507.23	440.1	502.976	445.164	509.316	438.36	508.085	435.586	507.971	429.53	509.942	427.866
515.594	425.988	517.344	427.035	515.508	430.796	513.88	434.947	518.14	432.641	517.989	430.964	511.994	429.387	517.011	431.517	513.055	431.907	511.951	428.803	518.583	429.915	511.315	431.146	509.299	433.865	518.633	428.177	511.524	425.359	515.491	430.248	509.94	429.347	514.131	428.606	517.354	431.204	507.014	440.669	503.043	445.842	508.905	438.832	508.404	435.969	507.936	430.17	509.355	427.944
516.229	425.909	517.938	427.132	515.466	431.451	513.364	435.088	517.72	433.003	517.357	430.996	512.016	429.997	516.811	431.983	512.384	431.854	512.013	429.462	518.51	430.577	511.034	431.527	509.729	434.14	518.663	428.826	511.601	426.008	515.415	430.935	510.008	430.028	514.37	429.032	516.99	431.491	506.56	441.052	502.457	445.927	508.445	439.145	508.949	436.217	507.999	430.862	509.103	428.357
516.738	426.11	518.285	427.59	515.385	432.103	512.942	435.32	517.101	433.031	517.027	431.318	511.952	430.564	516.168	432.025	511.712	431.827	512.084	430.122	518.364	431.217	510.668	431.821	509.96	434.575	518.664	429.476	511.62	426.66	515.181	431.559	510.065	430.711	514.995	429.122	516.755	432.045	506.155	441.318	502.096	446.25	507.978	439.333	509.311	436.67	508.051	431.555	508.931	428.851
517.106	426.42	518.501	428.206	515.114	432.676	512.891	435.92	516.986	433.578	517.02	431.951	511.655	430.982	515.513	432.007	511.194	432.117	511.926	430.65	518.106	431.817	510.321	432.142	510.36	434.811	518.605	430.123	511.595	427.312	514.785	431.994	510.043	431.365	515.324	429.616	516.209	432.289	506.005	441.797	502.021	446.87	507.781	439.844	509.468	437.337	507.647	431.841	508.346	428.931
517.225	426.883	518.597	428.86	514.681	432.992	512.396	436.074	516.725	433.979	516.39	432.071	511.248	431.23	515.053	432.182	510.856	432.509	511.596	431.067	517.535	431.953	510.013	432.511	510.795	435.086	518.503	430.763	511.483	427.954	514.128	432.01	509.877	431.963	515.512	430.253	515.546	432.374	506.063	442.466	502.04	447.541	507.387	440.145	509.489	438.027	507.165	432.129	508.107	429.364
517.69	427.088	518.645	429.519	514.066	433.022	511.96	436.287	516.086	433.998	515.741	432.093	510.892	431.513	515.019	432.81	510.72	432.997	511.17	431.278	517.108	432.193	509.666	432.779	511.246	435.478	518.356	431.396	511.236	428.54	513.997	432.566	509.3	432.079	515.578	430.92	514.87	432.326	505.712	442.885	501.722	447.926	506.939	440.386	509.441	438.713	506.705	432.543	507.915	429.845
518.185	427.316	518.66	430.18	514.029	433.629	511.912	436.886	515.439	434.01	515.077	432.021	510.665	431.913	514.497	433.044	510.072	432.898	510.854	431.609	517.048	432.78	509.281	433.09	511.421	436.092	517.94	431.84	510.878	429.037	513.721	432.981	508.854	432.383	515.539	431.587	514.308	432.043	505.332	443.206	501.125	448.061	506.76	440.902	509.303	439.371	506.62	433.222	507.339	429.935
518.427	427.9	518.628	430.841	514.019	434.272	511.433	437.054	515.018	434.246	514.414	431.939	510.176	432.157	513.859	433.124	509.46	432.961	510.605	432.018	516.535	433.017	508.852	433.463	511.503	436.746	517.512	432.154	510.235	429.061	513.073	433.022	508.656	433.022	515.402	432.229	513.931	431.607	504.957	443.505	500.448	447.98	506.325	441.16	508.921	439.895	506.635	433.91	507.065	430.374
518.568	428.517	518.55	431.498	514.007	434.921	510.978	437.25	514.999	434.881	513.751	431.913	509.765	432.506	513.189	433.066	508.902	433.21	510.133	432.244	515.918	433.107	508.802	434.116	511.497	437.41	517.092	432.295	509.611	429.057	513.009	433.654	508.661	433.704	515.097	432.812	513.875	430.979	504.671	443.959	500.125	448.312	505.919	441.447	508.399	440.11	506.761	434.569	506.959	430.966
518.65	429.151	518.42	432.14	513.427	434.976	510.928	437.852	514.451	434.976	513.094	431.945	509.636	433.149	512.521	432.99	508.785	433.864	509.963	432.711	515.254	433.04	508.805	434.785	511.387	438.062	516.879	432.797	509.028	429.064	512.992	434.324	508.784	434.358	514.53	433.006	513.316	430.718	504.084	444.008	499.935	448.809	505.748	441.968	507.948	440.336	507.269	434.923	507.024	431.636
518.673	429.79	518.128	432.72	513.016	435.226	510.461	438.042	514.012	435.207	513.05	432.572	509.653	433.802	511.852	432.917	508.749	434.527	510.016	433.358	514.591	432.956	508.845	435.454	511.143	438.62	516.55	433.218	509.012	429.696	512.949	434.96	509.034	434.953	513.891	433.047	512.659	430.574	503.47	444.039	499.377	448.923	505.26	442.172	507.845	440.926	507.699	435.224	506.614	431.869
518.667	430.429	517.627	432.958	512.948	435.863	509.986	438.228	513.93	435.843	512.718	432.907	509.785	434.413	511.182	432.857	508.792	435.198	509.78	433.804	513.93	432.91	508.909	436.122	510.685	439.009	515.92	433.362	509.001	430.333	512.298	434.987	509.676	434.991	513.229	432.963	511.982	430.518	503.021	444.335	499.131	449.354	504.901	442.505	507.327	441.102	508.069	435.515	506.115	432.087
518.633	431.068	517.088	433.081	513.015	436.514	509.933	438.838	513.995	436.499	512.125	432.977	510.116	434.914	510.524	432.908	508.878	435.866	509.39	434.11	513.269	432.934	508.977	436.789	510.268	439.238	515.277	433.359	508.994	430.974	512.026	435.402	510.109	435.353	513.037	433.458	511.306	430.567	502.762	444.759	498.909	449.811	504.741	443.038	506.967	441.414	508.368	435.885	505.752	432.596
518.524	431.698	517.043	433.677	513.057	437.163	509.471	439.039	514.048	437.154	512.051	433.58	510.65	435.089	510.101	433.188	508.97	436.533	508.892	434.318	513.081	433.431	509.05	437.456	509.919	439.522	514.661	433.253	508.368	430.983	511.996	436.059	510.37	435.952	512.991	434.089	510.657	430.715	502.438	445.117	498.352	449.937	504.187	443.179	507.021	442.101	508.859	436.178	505.654	433.236
518.344	432.3	516.651	433.952	513.021	437.805	508.974	439.203	514.031	437.803	511.712	433.902	511.144	435.308	510.033	433.794	509.065	437.2	508.879	434.979	512.813	433.834	509.117	438.124	509.68	439.958	514.133	432.956	508.026	431.278	512.029	436.743	510.448	436.632	513.04	434.752	510.042	430.979	501.988	445.363	498.123	450.388	503.88	443.564	506.921	442.712	509.272	436.584	505.668	433.905
518.062	432.862	516.044	434.019	512.512	437.955	508.952	439.837	513.511	437.947	511.139	433.98	511.351	435.924	509.492	433.924	509.147	437.868	508.909	435.64	512.28	433.946	509.172	438.792	509.27	440.209	513.947	432.441	508.017	431.912	511.556	436.945	510.457	437.314	512.541	434.915	510.015	431.624	501.747	445.814	497.86	450.805	503.686	444.059	506.568	443.06	509.413	437.26	505.778	434.567
517.507	432.976	515.388	433.961	512.088	438.18	508.507	440.039	513.088	438.189	510.941	434.557	511.437	436.572	509.114	434.218	509.201	438.538	508.976	436.3	512.106	434.438	509.216	439.461	508.907	440.505	513.794	431.909	507.441	431.976	511.073	437.155	510.395	437.99	512.123	435.178	509.695	431.958	501.386	446.146	497.329	450.952	503.12	444.187	505.978	443.153	509.367	437.949	506.251	434.828
517.063	433.161	515.091	434.304	512.039	438.77	507.981	440.157	513.024	438.793	510.873	435.182	511.459	437.229	509.027	434.802	509.209	439.203	509.053	436.959	511.83	434.82	509.2	440.131	508.688	440.95	513.2	431.677	506.993	432.233	511.007	437.806	510.188	438.636	511.998	435.754	509.073	431.984	500.949	446.401	497.121	451.422	502.866	444.617	505.906	443.779	509.151	438.55	506.764	435.083
517.045	433.754	514.983	434.862	511.552	438.927	507.972	440.793	512.511	438.944	510.921	435.848	511.406	437.886	508.486	434.924	508.978	439.798	509.111	437.62	511.29	434.922	508.986	440.672	508.273	441.199	512.572	431.545	506.79	432.83	511.011	438.481	509.686	438.905	512.026	436.41	508.863	432.61	500.733	446.87	496.822	451.802	502.61	445.05	505.503	444.068	508.758	439.04	507.223	435.466
516.61	433.968	514.397	434.935	511.106	439.129	507.539	441.004	512.094	439.188	511.002	436.512	511.204	438.488	508.125	435.229	508.495	440.038	509.146	438.28	511.068	435.417	508.584	441.085	507.907	441.495	511.926	431.475	506.769	433.477	510.77	438.915	509.223	439.156	511.828	436.857	508.775	433.266	500.341	447.166	496.3	451.958	502.017	445.179	504.957	444.21	508.194	439.161	507.415	436.087
516.004	434.017	514.084	435.301	511.048	439.726	506.892	441.002	512.028	439.779	511.076	437.176	510.87	438.96	508.024	435.797	507.85	440.047	508.887	438.799	510.983	436.011	508.186	441.297	507.705	441.956	511.276	431.468	506.787	434.13	510.151	438.988	509.08	439.649	511.258	436.969	508.787	433.945	499.923	447.433	496.115	452.454	501.938	445.784	504.912	444.853	508.002	439.614	507.538	436.748
515.377	433.986	513.978	435.883	510.585	439.924	506.265	441.026	511.526	439.934	511.141	437.841	510.251	438.999	507.481	435.896	507.207	440.046	508.488	439.112	511.046	436.673	507.862	441.618	507.281	442.189	510.629	431.505	506.832	434.783	510.062	439.572	508.616	439.915	511.104	437.477	508.844	434.623	499.721	447.907	495.788	452.801	501.984	446.476	504.419	445.001	508.037	440.289	507.614	437.418
515.079	434.311	514.028	436.54	510.119	440.119	506.005	441.422	511.113	440.174	511.093	438.499	510.027	439.434	507.081	436.208	506.982	440.47	507.953	439.227	510.589	436.879	507.596	442.029	506.908	442.473	509.985	431.581	506.893	435.434	509.715	439.921	508.032	440.018	510.805	437.842	508.911	435.299	499.273	448.17	495.274	452.952	502.071	447.167	503.747	444.976	507.867	440.877	507.647	438.091
514.997	434.872	513.731	436.883	510.044	440.695	505.895	441.971	511.051	440.757	510.765	438.87	509.887	439.953	506.86	436.775	506.988	441.13	508.01	439.885	510.187	437.161	507.172	442.272	506.725	442.947	509.397	431.821	506.959	436.085	509.103	440.021	507.353	439.929	510.249	437.958	508.983	435.975	498.958	448.539	495.079	453.473	501.909	447.76	503.112	445.061	507.402	441.111	507.658	438.765
514.438	434.936	513.185	437.003	509.61	440.909	505.275	442.013	510.555	440.954	510.227	439.021	509.269	439.998	506.92	437.444	506.963	441.766	507.959	440.492	509.989	437.668	506.848	442.609	506.297	443.179	509.074	432.243	507.026	436.736	508.415	439.959	507.121	440.4	510.119	438.479	509.056	436.651	499.034	449.228	495.026	454.078	501.507	448.077	502.995	445.622	506.95	441.337	507.645	439.439
514.088	435.229	513.087	437.554	509.141	441.086	505.01	442.405	509.947	441.014	510.091	439.531	508.627	439.991	506.992	438.112	506.534	442.007	507.797	441.047	510.033	438.312	506.593	443.014	505.916	443.459	509.016	432.844	507.09	437.387	508.102	440.323	506.8	440.769	509.814	438.858	509.122	437.328	498.841	449.764	495.043	454.721	500.972	448.223	502.984	446.288	506.851	441.927	507.584	440.11
513.982	435.789	512.741	437.861	509.064	441.656	504.929	442.978	509.288	440.951	509.741	439.834	508.063	440.05	507.072	438.78	506.013	442.159	507.232	441.141	509.879	438.786	506.135	443.259	505.735	443.94	508.464	432.926	507.151	438.039	507.916	440.835	506.331	440.965	509.255	439.026	509.177	438.005	498.479	450.116	494.529	454.987	501.018	448.911	502.945	446.941	506.337	442.101	507.476	440.773
514.027	436.417	512.194	437.972	508.647	441.889	504.301	442.994	509.103	441.418	509.24	439.994	508.044	440.681	507.09	439.451	505.981	442.799	506.967	441.507	509.363	438.962	505.98	443.743	505.302	444.169	508.085	433.208	507.201	438.691	507.328	440.915	506.116	441.44	508.593	438.975	509.205	438.684	497.959	450.277	493.914	455.027	500.961	449.565	502.335	446.989	505.942	442.397	507.318	441.426
513.876	436.865	512.089	438.527	508.155	442.049	504.016	443.361	508.864	441.856	509.068	440.512	507.647	440.943	506.802	439.835	505.518	442.998	507.027	442.166	509.141	439.4	506.03	444.393	504.919	444.448	507.962	433.78	507.226	439.344	507.067	441.385	505.768	441.771	508.169	439.197	509.153	439.357	497.805	450.803	493.308	455.019	500.73	450.064	501.666	446.989	505.855	443.005	506.883	441.86
513.309	436.946	511.757	438.855	508.062	442.619	503.993	443.992	508.301	441.994	509.034	441.111	507.089	441.05	506.255	439.979	505.007	443.144	506.902	442.731	508.844	439.762	505.769	444.86	504.755	444.947	508.013	434.418	507.217	439.995	506.98	442.013	505.324	442.002	508.017	439.733	508.934	439.878	497.413	451.111	493.082	455.495	500.097	450.108	501.006	447.014	505.252	443.104	506.441	442.165
513.109	437.385	511.215	438.974	507.671	442.885	504.01	444.635	507.659	441.979	509.067	441.744	507.032	441.656	506.029	440.493	505.008	443.799	506.561	443.067	508.372	439.958	505.398	445.162	504.309	445.161	507.857	434.86	507.104	440.633	507.037	442.699	505.046	442.465	507.517	439.892	508.322	439.971	496.933	451.333	492.708	455.8	499.926	450.62	500.975	447.69	504.921	443.468	506.001	442.347
512.921	437.835	511.091	439.505	507.177	443.043	503.684	444.952	507.167	442.12	508.534	441.981	506.651	441.935	505.974	441.092	504.537	443.988	505.984	443.148	508.144	440.394	504.973	445.377	503.916	445.425	507.289	434.932	506.69	440.918	506.555	442.899	505	443.064	507.185	440.225	508.114	440.431	497.007	452.022	492.317	456.079	499.658	451.039	500.975	448.36	504.811	444.045	505.776	442.813
512.385	437.937	510.769	439.839	507.072	443.587	503.078	445.004	507.041	442.671	507.928	442.032	506.098	442.039	506.052	441.759	504.037	444.154	506.006	443.782	507.84	440.753	504.772	445.881	503.771	445.938	507.011	435.394	506.172	441.065	506.149	443.197	504.996	443.672	507.024	440.734	507.862	440.842	496.91	452.617	492.089	456.516	499.02	451.089	500.909	448.945	504.188	444.107	505.419	443.134
512.127	438.313	510.245	439.975	506.7	443.865	503.027	445.617	506.591	442.878	507.302	441.986	506.042	442.633	506.075	442.428	503.997	444.791	505.985	444.413	507.378	440.953	504.292	446.031	503.325	446.152	506.87	435.971	506.08	441.598	505.977	443.749	504.529	443.925	506.515	440.891	507.289	440.944	496.636	453.061	491.7	456.83	498.998	451.732	500.266	448.995	503.929	444.532	504.96	443.342
511.982	438.802	510.114	440.487	506.197	444.011	502.693	445.946	506.189	443.131	507.097	442.467	505.681	442.921	505.785	442.823	503.512	444.98	505.887	445.015	507.145	441.385	503.645	445.981	502.926	446.412	506.916	436.62	505.714	441.87	506.039	444.433	504.213	444.289	506.189	441.232	507.068	441.434	496.062	453.178	491.189	456.996	498.978	452.398	500.03	449.451	503.75	445.036	504.774	443.824
511.464	438.916	509.799	440.849	506.091	444.554	502.086	445.999	506.059	443.663	506.748	442.788	505.119	443.005	505.301	443.046	503.044	445.184	505.312	445.084	506.842	441.736	503.144	446.202	502.783	446.928	506.985	437.266	505.187	441.993	505.775	444.839	503.919	444.663	506.018	441.727	506.995	442.036	495.997	453.758	490.512	456.913	498.878	453.007	499.838	449.949	503.127	445.095	504.417	444.134
511.156	439.241	509.276	441.04	505.736	444.855	502.032	446.6	505.607	443.871	506.316	443.015	505.062	443.597	505.105	443.502	503.002	445.814	504.958	445.375	506.397	441.932	502.855	446.592	502.335	447.139	507.06	437.913	505.084	442.544	505.248	445.024	503.501	444.929	505.516	441.889	507.06	442.711	495.978	454.414	490.104	457.28	498.234	453.058	499.196	449.99	502.938	445.593	503.955	444.339
511.04	439.757	508.625	440.974	505.217	444.995	501.717	446.935	505.198	444.122	506.108	443.473	504.715	443.9	504.741	443.801	503.017	446.473	504.905	445.976	506.111	442.36	502.65	447.044	501.933	447.397	507.126	438.56	504.748	442.855	505.095	445.549	503.196	445.308	505.195	442.234	506.56	442.899	495.833	455.015	489.92	457.816	497.965	453.489	499.037	450.509	502.685	446.03	503.778	444.831
510.538	439.89	508.198	441.168	505.088	445.52	501.117	446.978	505.069	444.65	505.755	443.785	504.135	443.971	504.3	444.033	502.842	446.944	504.334	446.064	505.983	442.898	502.153	447.218	501.803	447.931	507.121	439.205	504.21	442.962	504.699	445.838	502.877	445.674	505.002	442.709	506.186	443.206	495.264	455.13	490.021	458.492	497.805	454.027	498.79	450.939	502.053	446.094	503.41	445.133
510.181	440.165	508.047	441.683	504.753	445.837	501.023	447.557	504.623	444.867	505.325	444.017	504.068	444.565	504.096	444.499	502.198	446.961	503.968	446.362	506.061	443.56	501.867	447.6	501.346	448.132	507.015	439.782	504.045	443.493	504.239	446.066	502.474	445.954	504.519	442.894	506.051	443.732	495.006	455.506	489.676	458.803	497.137	454.048	498.145	450.97	501.936	446.678	502.954	445.348
510.064	440.68	507.579	441.914	504.242	445.978	501.005	448.182	504.213	445.117	505.111	444.464	503.737	444.896	503.73	444.79	502.044	447.483	503.912	446.974	505.661	443.856	501.65	448.049	500.935	448.385	506.487	439.939	503.991	444.081	504.079	446.589	502.172	446.338	504.199	443.246	505.532	443.895	495.092	456.188	489.279	459.124	497.011	454.57	498.052	451.556	501.602	447.042	502.781	445.845
509.618	440.875	507.018	442.004	504.105	446.492	501.058	448.837	504.075	445.629	504.763	444.776	503.154	444.975	503.301	445.021	501.809	447.926	503.328	447.055	505.3	444.17	501.146	448.211	500.827	448.956	506.18	440.283	504.06	444.731	503.65	446.848	501.842	446.685	503.977	443.695	505.189	444.226	494.937	456.803	488.867	459.495	497.03	455.248	497.74	451.925	500.963	447.096	502.397	446.131
509.211	441.106	506.361	441.935	503.782	446.821	500.492	448.929	503.643	445.896	504.345	445.019	503.067	445.544	503.039	445.485	501.19	447.985	502.959	447.345	505.061	444.561	500.872	448.603	500.28	449.018	506	440.73	503.56	444.883	503.236	447.123	501.454	446.959	503.51	443.884	505.03	444.732	494.464	457.082	488.886	460.176	496.979	455.909	497.103	451.968	501.025	447.782	501.946	446.351
509.078	441.599	506.126	442.383	503.269	446.963	500.108	449.208	503.091	446.02	504.114	445.451	502.752	445.882	503.002	446.083	501.052	448.51	502.943	447.979	504.665	444.878	500.657	449.053	499.648	449.008	505.515	440.881	503.175	445.17	503.052	447.628	501.11	447.347	503.172	444.244	504.518	444.95	493.784	457.116	488.936	460.856	496.377	456.019	497.02	452.609	501.01	448.448	501.792	446.869
508.691	441.868	505.824	442.753	503.123	447.458	500.037	449.8	502.431	445.949	503.765	445.767	502.19	445.97	502.984	446.676	500.799	448.928	502.339	448.009	504.149	445.024	500.136	449.198	499.084	449.141	505.173	441.208	502.99	445.68	502.599	447.864	500.983	447.882	502.958	444.738	503.917	445.001	493.098	457.012	489.013	461.536	495.705	456.036	497.001	453.273	500.851	449.006	501.386	447.134
508.179	442.009	505.377	442.949	502.819	447.825	499.505	449.929	502.145	446.332	503.359	446.029	502.08	446.513	502.525	446.923	500.191	449.01	501.696	448.011	503.488	444.942	499.876	449.604	498.9	449.617	504.96	441.694	503.025	446.313	502.228	448.182	501.053	448.547	503.046	445.404	503.283	444.966	492.441	457.038	489.091	462.215	495.044	456.034	496.955	453.883	500.173	449.029	500.934	447.349
507.545	441.934	505.15	443.378	502.317	448.029	499.117	450.199	501.878	446.744	503.11	446.449	501.777	446.858	502.212	447.286	499.531	448.971	501.074	448.051	503.16	445.313	499.665	450.061	498.675	450.046	505.026	442.337	502.879	446.788	502.026	448.671	500.65	448.878	502.78	445.796	503.09	445.48	491.968	457.276	489.134	462.896	494.998	456.684	496.342	453.959	499.505	449.039	500.798	447.88
507.156	442.197	504.853	443.737	501.673	447.973	499.033	450.77	501.411	446.928	502.759	446.764	501.221	446.946	501.93	447.664	499.101	449.18	500.974	448.615	502.836	445.675	499.119	450.185	498.094	450.132	504.847	442.779	502.375	446.96	501.548	448.882	500.292	449.216	502.336	446.05	502.731	445.798	491.932	457.925	489.092	463.536	494.6	456.979	496.088	454.386	499.013	449.222	500.379	448.132
506.947	442.701	504.411	443.946	501.217	448.139	498.53	450.918	501.163	447.34	502.363	447.034	501.073	447.478	501.509	447.898	499.041	449.798	500.697	449.002	502.479	445.968	498.872	450.599	497.908	450.613	504.368	442.974	502.148	447.38	501.211	449.236	499.963	449.559	502.103	446.473	502.302	446.031	491.353	458.036	488.687	463.929	494.037	457.106	495.891	454.866	498.974	449.877	499.935	448.355
507.032	443.333	504.159	444.356	501.033	448.637	498.135	451.175	500.898	447.735	502.11	447.445	501.021	448.077	501.175	448.268	498.494	449.928	500.066	449.037	502.175	446.328	498.663	451.053	497.684	451.054	504.144	443.395	501.883	447.756	500.979	449.694	499.608	449.89	501.744	446.77	502.091	446.502	490.67	458.006	488.3	464.234	494.01	457.763	495.29	454.94	498.412	450.002	499.801	448.882
506.865	443.792	503.859	444.713	500.604	448.851	498.039	451.733	500.433	447.927	501.764	447.76	501.063	448.726	500.964	448.747	498.113	450.221	499.989	449.61	501.853	446.668	498.088	451.167	497.077	451.113	503.852	443.736	501.407	447.919	500.498	449.902	499.266	450.229	501.339	447.032	501.714	446.804	489.982	457.917	487.939	464.527	493.534	457.97	495.072	455.427	498.01	450.284	499.355	449.117
506.402	444.051	503.432	444.933	500.248	449.14	497.557	451.894	500.175	448.326	501.378	448.035	500.573	448.957	501.05	449.413	498.026	450.805	499.733	450.003	501.499	446.974	497.97	451.674	496.981	451.64	503.41	443.912	501.141	448.326	500.193	450.285	498.931	450.571	501.041	447.46	501.304	447.071	489.322	457.992	487.637	464.92	493.051	458.168	495.013	456.055	498.005	450.957	498.961	449.39
505.786	444.001	503.126	445.334	500.052	449.601	497.137	452.136	499.907	448.716	501.113	448.43	499.986	449.039	500.753	449.795	497.483	450.917	499.083	450.001	501.183	447.317	497.993	452.318	496.995	452.284	503.101	444.32	501.003	448.845	499.929	450.708	498.596	450.912	501.001	448.049	501.081	447.524	488.995	458.372	487.265	465.23	493.036	458.829	495.056	456.734	497.356	450.982	499.016	450.058
505.288	444.088	502.971	445.843	499.637	449.843	496.988	452.694	499.456	448.93	500.77	448.749	499.333	448.956	500.36	450.102	497.108	451.22	498.445	450.009	500.858	447.655	497.857	452.881	496.912	452.881	502.927	444.832	501.071	449.493	499.458	450.923	498.245	451.243	500.986	448.642	500.694	447.811	488.924	458.978	486.905	465.548	492.478	458.979	494.54	456.949	497.014	451.335	498.913	450.654
505.058	444.521	503.06	446.498	499.27	450.132	497.014	453.329	499.188	449.319	500.397	449.038	499.116	449.403	500.079	450.479	496.973	451.794	498.03	450.246	500.516	447.981	497.398	453.097	496.429	453.06	503.003	445.478	500.745	449.871	499.177	451.327	497.899	451.573	500.558	448.924	500.302	448.091	488.272	459.015	486.627	465.95	491.808	459.001	493.911	457.006	496.978	452.011	498.639	451.084
504.702	444.796	502.71	446.825	499.058	450.575	496.897	453.82	498.914	449.71	500.115	449.421	498.836	449.783	499.716	450.787	497.033	452.457	497.987	450.867	500.197	448.316	496.969	453.323	495.974	453.266	503.057	446.124	500.234	450.074	498.881	451.716	497.583	451.911	500.234	449.269	500.072	448.532	487.984	459.45	486.242	466.239	491.128	458.978	493.228	456.935	496.993	452.689	498.067	451.171
504.341	445.06	502.331	447.126	498.659	450.827	496.35	453.933	498.473	449.967	499.77	449.746	498.343	449.922	499.356	451.101	496.791	452.857	497.442	450.987	499.87	448.671	497.016	453.988	495.915	453.879	502.989	446.68	499.588	449.976	498.426	451.945	497.172	452.24	499.933	449.622	499.682	448.814	487.936	460.116	485.889	466.563	491.041	459.59	493.02	457.495	496.585	452.958	497.881	451.648
504.102	445.456	502.068	447.503	498.287	451.106	496.095	454.369	497.865	449.961	499.404	450.05	498.094	450.376	499.067	451.479	496.219	452.97	497.034	451.238	499.53	449.049	496.94	454.594	495.423	454.052	502.541	446.938	499.213	450.234	498.156	452.365	496.921	452.698	499.555	449.912	499.306	449.114	488.027	460.804	485.629	466.985	490.679	459.918	492.98	458.124	496.058	453.131	497.622	452.058
503.768	445.756	501.705	447.797	498.063	451.539	495.983	454.93	497.296	450.017	499.12	450.421	497.981	450.934	498.711	451.79	496.091	453.509	497.006	451.864	498.888	448.986	496.701	455.048	494.97	454.254	502.232	447.275	498.954	450.643	497.828	452.722	496.976	453.38	499.232	450.257	499.054	449.542	488.024	461.486	485.238	467.252	490.108	460.035	493.009	458.754	495.941	453.766	497.036	452.153
503.391	446.015	501.35	448.104	497.685	451.796	496.043	455.585	496.978	450.475	498.777	450.764	498.05	451.588	498.361	452.105	495.756	453.839	496.465	451.965	498.359	449.091	496.11	455.121	494.997	454.908	501.96	447.628	498.557	450.883	497.391	452.96	497.048	454.061	498.916	450.606	498.659	449.825	487.794	461.959	484.898	467.605	489.934	460.649	492.466	458.919	495.977	454.445	496.99	452.735
503.134	446.399	501.068	448.482	497.294	452.063	495.665	455.857	496.981	451.085	498.36	451.025	497.656	451.859	498.06	452.469	495.233	453.977	496.038	452.193	497.995	449.442	495.915	455.598	494.972	455.537	501.573	447.89	498.247	451.221	497.084	453.399	496.934	454.62	498.558	450.897	498.299	450.142	487.143	461.985	484.639	468.085	489.923	461.315	492.171	459.31	496.034	455.136	496.98	453.374
502.814	446.719	500.713	448.79	496.98	452.491	495.22	456.086	496.952	451.646	497.699	450.923	497.255	452.131	497.714	452.788	495.069	454.506	495.99	452.826	497.703	449.801	495.694	456.05	494.783	456.008	501.259	448.222	497.982	451.612	496.991	453.975	496.591	455.031	498.197	451.246	498.039	450.556	487.02	462.557	483.966	468.045	489.997	462.007	491.931	459.749	496.044	455.828	496.865	453.962
502.437	446.979	500.365	449.101	496.955	453.088	495.022	456.584	496.541	451.929	497.222	451.154	497.063	452.589	497.371	453.111	495.033	455.11	496	453.471	497.379	450.135	495.085	456.109	494.165	456.044	500.979	448.588	497.589	451.872	497.023	454.621	496.145	455.278	497.953	451.693	497.647	450.835	487.003	463.22	483.286	467.981	490.086	462.699	491.421	459.926	495.466	455.919	496.323	454.095
502.169	447.346	500.083	449.467	497.026	453.741	495.021	457.195	496.223	452.278	496.917	451.599	496.655	452.829	497.053	453.461	495.071	455.752	495.812	453.922	497.009	450.437	494.925	456.636	494.014	456.54	500.608	448.868	497.268	452.202	496.578	454.909	495.986	455.755	498.032	452.36	497.298	451.158	487.029	463.9	482.619	467.924	490.08	463.389	491.151	460.349	495.017	456.223	495.937	454.379
501.866	447.677	499.736	449.799	497.087	454.396	494.974	457.75	495.914	452.626	497.008	452.261	496.258	453.092	496.711	453.79	494.529	455.982	495.209	453.979	496.713	450.807	494.922	457.296	494.007	457.187	500.286	449.193	497.003	452.587	496.239	455.261	496.049	456.417	497.766	452.761	497.024	451.556	486.395	463.957	482.136	468.212	489.844	463.87	490.862	460.746	494.802	456.857	495.866	454.976
501.502	447.945	499.294	450.011	496.796	454.788	494.466	457.928	495.54	452.904	496.811	452.722	496.035	453.557	496.37	454.122	493.916	456.031	495.064	454.483	496.382	451.14	495.002	457.961	493.979	457.833	500.002	449.555	496.623	452.853	495.931	455.628	495.748	456.869	497.39	453.085	496.636	451.843	486.065	464.33	481.836	468.615	489.243	463.983	490.377	460.927	494.818	457.552	495.285	455.075
501.211	448.286	498.64	449.916	496.39	455.085	494.183	458.301	495.19	453.257	496.468	453.072	496.039	454.165	496.04	454.464	493.29	455.993	495.038	455.099	496.003	451.424	495.079	458.628	493.491	457.999	499.647	449.843	496.295	453.172	495.538	455.924	495.368	457.18	496.98	453.404	496.291	452.178	485.998	464.968	481.622	469.057	489.093	464.511	490.064	461.38	494.859	458.246	494.907	455.396
500.915	448.623	498.189	450.188	496.107	455.432	493.95	458.715	494.955	453.703	496.112	453.368	495.976	454.726	495.704	454.799	493.093	456.484	495.065	455.757	495.725	451.804	495.089	459.284	493.007	458.162	499.321	450.159	496.022	453.544	495.214	456.285	494.967	457.443	496.957	454.004	495.994	452.564	486.027	465.655	481.152	469.247	488.753	464.856	489.935	461.955	494.919	458.939	494.849	456.062
500.565	448.908	497.918	450.645	495.769	455.739	493.486	458.912	495.046	454.362	495.794	453.71	495.504	455.012	495.368	455.131	492.734	456.8	494.575	455.981	495.395	452.134	494.954	459.917	493.01	458.808	499.023	450.506	495.658	453.83	494.887	456.643	494.726	457.928	497.028	454.672	495.616	452.847	485.618	465.926	480.874	469.677	488.202	464.999	490.019	462.641	494.991	459.632	494.901	456.734
500.255	449.237	498	451.301	495.409	456.038	493.195	459.278	494.783	454.771	495.481	454.061	494.899	455.022	495.031	455.46	492.301	457.03	493.954	456.046	494.998	452.402	494.406	460.043	492.529	458.99	498.683	450.814	495.324	454.148	494.512	456.956	494.178	458.023	497.098	455.34	495.256	453.183	485.122	466.119	480.584	470.107	488.084	465.571	490.079	463.329	495.061	460.324	494.968	457.405
499.955	449.577	497.786	451.725	495.078	456.398	492.955	459.695	494.412	455.094	495.109	454.349	494.333	455.046	494.709	455.806	492.111	457.497	493.301	455.975	494.732	452.786	493.976	460.268	491.881	459.006	498.352	451.133	495.032	454.511	494.187	457.318	493.55	458.027	496.809	455.782	494.944	453.588	485.056	466.729	479.902	470.091	487.684	465.861	489.838	463.782	495.128	461.016	495.047	458.075
499.613	449.874	497.441	452.056	495.02	456.943	492.505	459.905	494.092	455.416	494.799	454.7	494.077	455.472	494.38	456.137	491.745	457.817	493.092	456.416	494.388	453.118	493.967	460.921	491.237	459.006	498.036	451.47	494.682	454.813	493.847	457.67	493.082	458.273	496.439	456.131	495.035	454.262	484.554	466.918	479.223	470.023	487.194	466.063	489.36	464.045	495.186	461.71	495.109	458.746
499.296	450.193	497.017	452.353	495.063	457.563	492.211	460.264	493.762	455.746	494.497	455.061	493.727	455.777	494.04	456.447	491.249	458.006	492.859	456.845	493.95	453.384	493.409	461.015	491.032	459.459	497.713	451.777	494.348	455.128	493.48	458	492.829	458.735	496.055	456.392	494.83	454.729	484.127	467.178	478.544	469.944	487.074	466.633	489.116	464.46	495.214	462.404	495.071	459.402
498.995	450.527	496.942	452.906	494.675	457.946	491.979	460.684	493.428	456.076	494.111	455.339	493.362	456.057	493.725	456.843	490.583	457.932	492.311	456.951	494.01	454.032	492.754	461.011	490.852	459.94	497.374	452.088	494.05	455.476	493.163	458.36	492.479	459.073	495.756	456.771	494.445	455.064	484.059	467.783	477.864	469.877	486.621	466.875	488.751	464.777	495.192	463.096	494.923	460.027
498.669	450.831	497.012	453.564	494.129	458.046	491.532	460.912	493.092	456.402	493.801	455.695	493.098	456.449	493.255	457.032	490.153	458.22	492.115	457.405	493.921	454.591	492.116	461.026	490.24	459.975	497.005	452.414	493.716	455.792	492.818	458.729	491.797	459.024	495.435	457.121	494.114	455.397	483.508	468.043	477.292	470.069	486.191	467.139	488.353	465.07	495.103	463.782	494.273	460.03
498.346	451.143	497.088	454.221	493.5	457.989	490.962	460.957	492.765	456.742	493.502	456.064	492.755	456.759	492.588	456.951	489.917	458.727	491.886	457.833	493.643	455.032	491.996	461.567	490.025	460.434	496.994	452.995	493.388	456.108	492.417	459.054	491.118	458.93	495.05	457.385	493.776	455.732	482.865	468.143	476.9	470.421	486.048	467.688	488.093	465.488	494.523	463.941	493.967	460.394
498.029	451.462	496.877	454.707	493.137	458.315	490.338	460.927	492.438	457.081	493.106	456.336	492.391	457.048	492.184	457.256	490.014	459.393	491.339	457.966	493.212	455.246	491.738	461.957	489.983	461.058	496.966	453.563	493.088	456.439	491.731	458.962	490.439	458.853	494.768	457.815	493.435	456.068	482.172	468.098	476.789	470.962	485.557	467.894	487.711	465.823	494.168	464.284	493.956	461.062
497.718	451.771	496.525	455.085	492.821	458.662	490.002	461.388	492.105	457.396	492.801	456.699	492.109	457.424	491.852	457.624	489.753	459.773	490.709	457.957	492.878	455.566	491.09	461.932	490.028	461.713	496.633	453.913	492.757	456.798	491.254	459.183	489.756	458.811	494.342	458.053	493.092	456.395	481.483	468.019	476.28	471.135	485.197	468.217	487.209	466.007	493.997	464.778	494.039	461.732
497.387	452.083	496.123	455.323	492.538	459.022	489.896	461.961	491.782	457.768	492.51	457.072	491.769	457.744	491.589	458.041	489.352	460.056	490.175	458.069	492.657	456.011	490.45	461.979	489.598	461.932	496.253	454.212	492.337	457.046	490.899	459.551	489.188	459.076	493.676	457.966	492.765	456.74	480.793	467.944	475.916	471.447	485.054	468.74	486.525	465.911	493.438	464.913	494.035	462.385
497.017	452.401	495.819	455.667	492.179	459.302	489.963	462.616	491.387	458.054	492.11	457.325	491.408	458.042	490.932	457.945	489.032	460.453	489.958	458.608	492.214	456.232	490.006	462.251	489.102	462.106	495.945	454.561	491.688	456.967	490.599	459.884	488.914	459.551	493.233	458.213	492.435	457.083	480.103	467.887	475.801	471.995	484.521	469.02	486.117	466.277	493.149	465.317	493.916	462.968
496.989	452.962	495.532	456.042	491.862	459.652	490.041	463.27	490.728	457.96	491.816	457.709	491.116	458.409	490.361	458.05	489	461.045	489.974	459.237	491.878	456.56	489.879	462.869	489.009	462.705	496.031	455.206	491.264	457.196	490.176	460.213	488.94	460.225	492.893	458.576	492.074	457.399	479.417	467.912	475.227	472.119	483.896	469.108	485.948	466.819	492.922	465.779	493.288	463.007
496.984	453.537	495.082	456.289	491.58	460.065	489.852	463.73	490.267	458.175	491.48	458.034	490.782	458.73	489.891	458.371	488.964	461.625	489.907	459.76	491.666	457.012	489.949	463.528	489.01	463.348	495.858	455.678	490.932	457.545	489.882	460.663	488.843	460.787	492.661	459.052	491.752	457.755	479.13	468.328	474.908	472.515	483.202	469.051	486.055	467.502	492.384	465.923	493.028	463.416
496.665	453.885	494.975	456.801	490.927	459.985	489.442	464.029	489.909	458.517	490.82	457.928	490.429	459.029	489.969	459.038	488.559	461.921	489.406	459.901	491.201	457.221	490.011	464.192	488.912	463.879	495.534	456.044	490.646	457.933	489.912	461.354	488.466	461.087	492.021	459.036	491.42	458.103	478.901	468.813	474.854	473.186	482.511	468.966	485.678	467.861	492.099	466.367	493.004	464.062
496.292	454.181	495.009	457.427	490.387	460.086	489.153	464.377	489.641	458.878	490.284	458.107	490.12	459.381	489.881	459.585	488.195	462.263	489.064	460.311	490.87	457.541	490.025	464.855	488.321	463.944	495.115	456.298	490.113	458.001	489.993	462.042	487.946	461.253	491.353	458.975	491.048	458.407	478.355	469.026	474.92	473.866	481.817	468.923	485.337	468.202	491.984	466.952	493.003	464.725
495.928	454.478	494.744	457.861	489.967	460.38	488.826	464.699	489.262	459.189	489.919	458.48	489.796	459.692	489.634	460.016	487.961	462.704	488.857	460.848	490.685	457.982	489.462	464.952	488.071	464.376	494.984	456.777	489.502	457.979	490.065	462.73	487.982	461.93	490.685	458.901	490.742	458.772	477.692	468.995	474.995	474.546	481.258	469.048	485.036	468.547	492.06	467.643	492.588	464.969
496	455.113	494.353	458.155	489.742	460.776	488.465	464.996	488.943	459.557	489.987	459.143	489.455	459.978	489.138	460.227	488.051	463.371	488.902	461.51	490.155	458.177	489.082	465.232	487.992	464.973	495.05	457.413	489.102	458.299	490.119	463.418	488.058	462.607	490.193	459.167	490.411	459.115	477.003	468.934	475.073	475.225	481.063	469.576	484.67	468.995	491.591	467.883	492.048	465.088
495.888	455.615	493.948	458.417	489.417	461.103	488.162	465.344	489.017	460.217	489.852	459.667	489.053	460.328	488.933	460.689	487.769	463.77	488.972	462.17	489.863	458.598	489.031	465.84	488.036	465.629	494.764	457.831	488.803	458.642	489.764	463.848	488.103	463.275	489.86	459.535	490.018	459.401	476.312	468.915	475.126	475.906	480.639	469.924	484.102	469.188	491.217	468.211	492.009	465.728
495.604	455.993	494.023	459.073	488.961	461.341	487.84	465.674	488.834	460.693	489.57	460.071	488.895	460.851	488.972	461.357	487.387	464.096	489.049	462.829	489.823	459.26	489.047	466.494	487.648	465.895	494.415	458.149	488.544	458.991	489.352	464.171	487.93	463.899	489.698	460.001	489.732	459.762	476.094	469.428	475.025	476.537	480.079	470.084	483.414	469.214	491.017	468.693	492.007	466.379
495.11	456.215	493.905	459.621	489	461.964	487.499	465.985	488.507	461.06	489.059	460.245	488.93	461.509	489.067	462.023	487.014	464.428	489.118	463.489	489.876	459.925	488.794	466.923	487.174	466.09	494.002	458.367	488.07	459.255	488.959	464.464	487.387	464.036	489.177	460.188	489.374	460.095	475.757	469.792	474.758	477.035	479.386	470.017	482.724	469.171	490.525	468.873	491.895	466.917
494.787	456.592	493.641	460.069	488.945	462.538	487.175	466.319	488.038	461.298	488.979	460.776	489.014	462.164	489.136	462.691	487.011	465.032	489.135	464.151	489.94	460.59	488.191	467.059	487.06	466.632	493.765	458.783	487.865	459.738	489.038	465.152	486.725	464.022	488.952	460.612	488.907	460.382	475.284	469.99	474.144	477.092	478.694	469.933	482.035	469.11	490.172	469.238	491.277	466.975
494.746	457.222	493.17	460.234	488.694	462.997	486.85	466.644	487.937	461.834	488.99	461.401	489.076	462.82	489.155	463.349	486.952	465.602	489.021	464.719	490.014	461.254	487.533	467.002	486.648	466.87	493.448	459.117	487.87	460.389	488.868	465.694	486.102	464.079	489.028	461.277	488.91	461.044	475.091	470.499	474.028	477.6	478.001	469.884	481.347	469.041	489.966	469.763	491.059	467.43
495.019	457.702	492.871	460.585	488.259	463.207	486.522	466.958	487.997	462.495	488.783	461.902	489.109	463.472	488.863	463.884	486.596	465.969	488.52	464.959	490.084	461.918	487.127	467.224	486.183	467.064	493.019	459.332	487.942	461.04	488.54	466.103	485.99	464.635	488.832	461.788	488.964	461.72	474.717	470.789	474.051	478.265	477.346	469.916	480.66	468.967	490.044	470.453	490.868	467.909
495.418	458.059	492.673	461.048	487.901	463.489	486.153	467.292	488.076	463.156	488.341	462.144	488.743	463.852	488.35	464.059	486.233	466.267	488.221	465.305	490.133	462.583	487.024	467.792	486.02	467.605	492.79	459.745	488.016	461.69	488.09	466.302	485.979	465.298	488.46	462.108	489.051	462.394	474.259	471.004	473.962	478.916	477.061	470.417	479.972	468.898	489.718	470.824	490.262	467.969
495.988	458.164	492.192	461.216	487.714	463.945	485.974	467.761	487.897	463.672	487.96	462.419	488.359	464.17	487.702	464.021	485.893	466.584	487.958	465.671	490.16	463.249	486.488	467.917	486.018	468.227	492.499	460.097	488.094	462.339	487.821	466.744	485.939	465.95	487.948	462.271	489.102	463.071	473.931	471.511	473.398	479.039	476.715	470.744	479.283	468.837	489.3	471.121	490.069	468.438
496.282	458.626	491.886	461.573	487.264	464.171	486.056	468.415	487.57	464.075	488.025	463.083	487.959	464.426	487.144	464.161	485.594	466.957	487.532	465.951	489.91	463.786	486.144	468.234	485.97	468.788	492.056	460.299	488.132	462.992	487.44	467.044	485.345	466.033	488.011	462.938	488.95	463.635	473.866	472.154	472.735	479.04	476.337	471.024	478.593	468.79	489.065	471.561	489.864	468.895
496.445	459.241	491.691	462.048	486.954	464.512	485.753	468.812	487.092	464.267	487.904	463.653	488.05	465.075	486.985	464.632	485.225	467.26	486.943	465.975	489.506	464.1	486.03	468.783	485.432	468.943	491.813	460.702	488.015	463.564	486.754	466.948	484.978	466.337	487.943	463.539	488.619	464.084	473.91	472.846	472.092	479.045	475.951	471.453	477.904	468.811	488.65	471.848	489.262	468.963
496.512	459.876	491.035	461.963	487.023	465.165	485.411	469.143	486.993	464.782	487.631	464.084	487.948	465.628	487.029	465.284	485.035	467.695	486.348	465.993	488.956	464.2	485.494	468.916	485.177	469.327	491.54	461.077	487.71	464.04	486.223	467.161	484.978	467.005	487.744	464.06	488.163	464.262	473.987	473.535	471.979	479.61	475.904	472.092	477.342	469.021	488.293	472.171	489.104	469.447
496.539	460.514	490.446	462.035	486.871	465.696	485.069	469.412	487.007	465.41	487.092	464.197	487.627	466.072	486.875	465.855	485.149	468.357	486.003	466.421	489.019	464.86	485.166	469.244	484.98	469.781	491.081	461.27	487.261	464.217	485.996	467.607	484.315	467.064	487.195	464.168	487.857	464.62	474.064	474.225	471.682	479.998	475.965	472.785	476.915	469.414	488.076	472.592	488.893	469.936
496.534	461.153	489.929	462.254	486.577	466.091	484.771	469.827	486.772	465.895	486.868	464.63	486.989	465.995	486.388	466.024	484.849	468.872	485.97	467.006	488.977	465.48	485.06	469.78	484.482	470.09	490.832	461.659	486.908	464.491	486.105	468.287	483.638	467.041	486.896	464.533	487.613	465.056	474.112	474.916	471.041	480.045	476.056	473.476	476.697	469.839	487.67	473.052	488.294	470.184
496.452	461.786	489.979	462.907	486.059	466.225	484.347	470.084	486.357	466.157	486.631	465.058	486.419	466.06	485.736	466.007	484.371	469.194	485.985	467.599	488.828	466.053	484.517	470.021	483.871	470.189	490.586	462.054	486.72	464.952	485.87	468.855	482.959	466.962	486.743	465.05	487.137	465.252	474.12	475.607	470.982	480.668	476.097	474.169	476.339	470.162	487.112	473.313	487.633	470.229
496.275	462.38	489.93	463.506	486.019	466.759	483.691	470.025	485.97	466.406	486.07	465.177	485.951	466.328	485.13	466.111	483.708	469.266	485.601	467.917	488.259	466.125	483.911	470.11	483.207	470.182	490.086	462.229	486.267	465.169	485.382	469.148	482.303	467.002	486.187	465.16	486.847	465.637	473.64	475.876	470.637	481.001	475.907	474.7	475.931	470.452	486.424	473.377	486.959	470.214
495.981	462.925	489.788	464.053	486.042	467.384	483.036	469.953	486.083	467.062	485.986	465.713	485.988	466.955	485.004	466.596	483.038	469.224	485.286	468.245	487.94	466.461	483.243	470.051	482.544	470.127	489.973	462.721	485.963	465.507	484.702	469.216	482.02	467.402	485.898	465.536	486.594	466.062	473.238	476.21	470.004	481.042	475.485	475.057	475.699	470.898	485.739	473.284	486.287	470.165
495.41	463.014	489.251	464.156	485.843	467.931	482.458	470.008	485.965	467.653	485.995	466.349	485.935	467.533	485.06	467.249	482.368	469.158	484.99	468.589	487.846	467.035	482.577	469.97	481.882	470.061	490.01	463.346	486.032	466.155	484.012	469.156	481.891	467.959	485.737	466.04	486.107	466.25	472.953	476.638	470.003	481.707	475.136	475.375	475.3	471.186	485.279	472.943	485.615	470.102
494.998	463.237	488.925	464.486	485.311	468.05	482.033	470.323	485.66	468.115	485.852	466.91	485.705	468.007	484.944	467.867	481.7	469.073	484.632	468.992	487.187	466.991	481.91	469.922	481.221	469.991	489.816	463.841	485.883	466.693	483.324	469.073	481.248	468.065	485.177	466.148	485.845	466.669	473.046	477.326	469.62	481.99	474.791	475.708	474.906	471.474	484.957	472.456	484.944	470.036
494.984	463.849	488.812	465.045	484.682	468.048	481.777	470.726	484.999	468.111	485.386	467.107	485.283	468.211	484.443	468.105	481.032	468.986	484.072	469.11	486.554	467.022	481.26	469.926	480.559	469.921	489.428	464.119	485.603	467.098	482.637	468.984	480.578	468.046	485.026	466.603	485.592	467.089	473.103	478.015	469.024	482.062	474.436	476.049	474.689	471.915	484.703	471.916	484.273	469.967
494.543	464.175	488.164	465.001	484.129	468.158	481.502	471.091	484.34	468.043	484.955	467.334	484.936	468.519	483.783	468.151	480.363	468.917	483.411	469.075	485.961	467.134	481.103	470.463	479.896	469.865	488.952	464.287	485.118	467.23	481.949	468.913	479.897	467.97	485.085	467.256	485.114	467.249	473.041	478.642	469.011	482.722	474.032	476.387	474.214	472.175	484.132	471.639	483.601	469.906
493.957	464.366	487.548	465.035	483.905	468.599	481.095	471.318	483.7	467.987	484.863	467.918	484.743	469.04	483.115	468.072	479.692	468.871	482.753	468.991	486.047	467.784	480.765	470.842	479.233	469.83	489.043	464.929	484.883	467.665	481.345	469.048	479.216	467.893	484.917	467.843	484.88	467.731	472.587	479.022	468.585	482.977	474.002	476.988	473.897	472.579	483.461	471.471	482.929	469.855
493.32	464.378	486.978	465.163	483.719	469.075	480.831	471.751	483.152	468.14	484.329	468.016	484.144	469.106	482.448	467.985	479.192	469.146	482.092	468.931	486.038	468.422	480.269	471.073	478.57	469.857	488.988	465.524	484.62	468.078	480.94	469.383	478.546	467.933	484.435	468.109	484.556	468.142	471.958	479.019	468.048	483.124	473.957	477.586	473.914	473.268	482.773	471.367	482.255	469.821
492.7	464.271	486.881	465.72	483.063	469.062	480.488	472.103	482.906	468.568	483.689	468.015	483.487	469.077	481.791	467.939	478.874	469.548	481.475	468.944	485.928	469.036	479.604	470.99	478.188	470.195	488.804	466.075	483.97	468.064	480.861	469.99	478.069	468.18	483.782	468.175	483.88	468.195	471.366	479.058	468.006	483.757	473.598	477.981	473.997	473.954	482.081	471.304	481.586	469.871
492.132	464.065	486.566	466.066	482.409	469.005	479.832	472.087	482.72	469.035	483.091	468.107	482.832	468.998	481.161	468.025	478.722	470.059	481.108	469.311	485.282	469.164	478.938	470.935	477.921	470.654	488.163	466.034	483.32	468.002	480.231	470.071	478.013	468.805	483.115	468.094	483.202	468.17	470.965	479.433	467.54	484.053	473.223	478.283	474.071	474.641	481.387	471.259	481.162	470.157
492.072	463.475	485.967	466.139	481.767	468.954	479.177	472.02	482.062	468.999	482.925	468.606	482.176	468.933	480.986	468.523	478.055	469.985	480.808	469.718	484.626	469.203	478.305	470.94	477.534	470.936	487.558	466.059	482.689	467.962	479.544	470.048	477.482	468.944	482.448	468.005	482.524	468.121	470.999	480.084	466.897	484.166	472.875	478.631	474.116	475.322	480.692	471.232	481.041	470.727
491.784	463.034	485.991	466.763	481.194	469.088	478.522	471.943	481.451	469.061	482.695	469.025	481.567	468.967	480.787	468.989	477.461	470.055	480.492	470.08	483.96	469.16	478.089	471.441	476.967	470.982	487.002	466.166	482.146	468.141	478.856	469.966	477.091	469.22	481.791	467.951	481.848	468.054	470.896	480.641	466.215	484.124	472.561	479.047	473.843	475.848	479.996	471.231	480.54	470.996
491.283	462.734	485.984	467.391	480.937	469.505	477.865	471.884	480.949	469.252	482.033	468.994	481.054	469.197	480.156	469.036	476.952	470.268	479.832	470.014	483.298	469.075	477.748	471.774	476.367	470.987	486.883	466.693	481.895	468.569	478.167	469.902	477.04	469.839	481.168	468.059	481.172	467.981	470.545	481.034	465.535	484.056	471.872	478.951	473.42	476.142	479.301	471.251	479.95	471.104
490.662	462.78	485.889	467.981	480.813	470.036	477.322	472.067	480.891	469.86	481.413	469.048	480.864	469.68	479.989	469.541	476.825	470.806	479.173	469.948	482.636	468.992	477.338	472.007	476.085	471.42	486.618	467.07	481.749	469.074	477.519	469.968	476.46	469.947	480.955	468.53	480.496	467.911	470.177	481.323	464.856	483.979	471.303	479.101	472.957	476.343	478.606	471.292	479.277	471.052
490.21	463.027	485.341	468.077	480.168	470.071	476.898	472.387	480.44	470.092	480.972	469.286	480.585	470.048	479.764	469.982	476.394	470.994	478.542	469.931	481.973	468.917	477.11	472.454	475.746	471.75	486.054	467.147	481.098	469.047	476.977	470.192	475.817	469.973	480.783	469.015	479.819	467.848	469.843	481.697	464.176	483.902	470.904	479.483	472.798	476.879	477.915	471.371	478.607	470.976
490.033	463.563	484.971	468.357	479.518	470.04	476.76	472.872	479.782	470.111	480.919	469.898	479.93	470.019	479.121	469.992	475.735	470.933	478.113	470.256	481.315	468.969	476.759	472.772	475.387	472.041	485.904	467.637	480.449	468.989	476.922	470.814	475.156	469.958	480.125	468.986	479.14	467.83	469.49	482.075	463.495	483.851	470.999	480.172	472.363	477.133	477.233	471.499	477.936	470.908
489.659	463.819	484.908	468.957	478.864	469.963	476.374	473.138	479.12	470.045	480.383	470.001	479.275	469.949	478.461	469.991	475.161	471.116	477.817	470.639	481.015	469.342	476.346	473.027	475.097	472.426	485.678	468.05	479.804	468.921	476.435	470.968	475.002	470.556	479.481	469.008	478.514	467.936	468.802	481.984	462.816	483.853	470.835	480.698	471.925	477.383	476.592	471.711	477.264	470.85
489.296	464.078	484.321	469.048	478.21	469.894	475.941	473.366	478.459	469.97	479.736	470.001	478.641	469.942	478.017	470.206	474.949	471.584	477.577	471.038	480.994	469.966	476.103	473.458	474.759	472.728	485.115	468.124	479.237	469.073	475.763	470.951	474.975	471.198	478.991	469.193	477.951	468.178	468.307	482.169	462.14	483.925	470.514	481.094	471.796	477.94	476.05	472.092	476.592	470.869
489.081	464.51	483.672	469.036	477.57	469.933	475.781	473.859	477.798	469.894	479.1	470.043	478.064	470.129	478.02	470.865	474.97	472.236	477.14	471.269	480.353	470.094	475.748	473.764	474.392	473.004	484.931	468.592	478.934	469.447	475.11	471.046	474.984	471.82	478.973	469.83	477.881	468.763	467.936	482.522	462.045	484.529	470.063	481.325	471.313	478.143	475.905	472.66	476.18	471.172
488.724	464.792	483.016	468.948	476.961	470.077	475.393	474.129	477.135	469.843	478.971	470.569	477.872	470.588	477.475	470.979	474.875	472.812	476.84	471.619	479.698	470.125	475.339	474.019	474.004	473.381	484.725	469.042	478.87	470.023	474.964	471.603	474.412	471.935	478.474	469.94	477.483	469.003	467.667	482.994	461.723	484.885	469.787	481.749	470.914	478.428	475.608	473.051	475.961	471.681
488.334	465.038	482.377	469.004	476.958	470.701	474.945	474.338	476.504	469.937	478.752	471	477.678	471.025	477.024	471.214	474.471	473.076	476.602	472.027	479.033	470.073	475.042	474.452	473.892	473.942	484.089	469.064	478.228	469.989	474.957	472.271	474.129	472.333	477.823	469.917	476.814	468.965	467.062	483.053	461.141	484.961	469.465	482.118	470.79	478.985	474.972	473.123	475.521	471.888
488.113	465.453	481.975	469.288	476.639	471.019	474.798	474.828	475.973	470.173	478.094	470.99	477.089	471.118	476.927	471.853	473.966	473.235	476.122	472.242	478.369	469.997	474.991	475.033	473.94	474.605	483.446	469.012	477.598	470.008	474.979	472.939	473.928	472.807	477.192	470.001	476.19	469.077	466.372	482.996	461.017	485.574	469.021	482.347	470.25	479.141	474.899	473.727	474.948	471.938
487.785	465.758	481.974	469.928	476.016	471.041	474.401	475.099	475.943	470.792	477.455	471.018	476.888	471.618	476.99	472.517	473.996	473.901	475.97	472.72	477.705	469.923	475.004	475.638	474.023	475.265	482.808	468.956	476.986	470.093	474.371	473.005	473.369	472.91	476.904	470.497	475.919	469.492	465.683	482.921	460.991	486.222	468.781	482.848	469.99	479.534	474.537	474.051	474.317	471.936
487.379	465.984	481.41	470.004	475.973	471.654	473.924	475.305	475.529	471.03	477.013	471.246	476.856	472.272	477.037	473.18	473.949	474.534	476.017	473.363	477.041	469.851	474.569	475.894	474.08	475.927	482.205	469.043	476.924	470.665	473.994	473.331	473.08	473.35	476.782	471.127	475.803	470.032	465.205	483.194	460.98	486.841	468.306	483.07	470.062	480.216	473.952	474.163	473.977	472.416
487.148	466.385	480.764	470.003	475.661	472.001	473.908	475.957	474.965	471.133	476.971	471.871	476.916	472.929	477.015	473.838	473.768	475.052	475.788	473.836	476.375	469.812	474.213	476.238	474.065	476.547	481.964	469.456	476.663	471.038	473.938	474.005	472.971	473.948	476.828	471.797	475.187	470.084	464.868	483.599	460.396	486.933	467.614	483.028	469.897	480.808	473.939	474.852	473.887	473.015
486.843	466.714	480.134	470.027	475.04	472.043	473.952	476.611	474.852	471.774	476.438	472.003	476.99	473.584	476.467	473.956	473.14	475.087	475.398	474.131	475.718	469.856	473.964	476.674	473.672	476.896	481.881	470.011	476.06	471.076	474.03	474.692	473.075	474.625	476.91	472.464	474.944	470.505	464.649	484.093	460.087	487.329	466.923	482.943	469.431	481.036	473.994	475.542	473.951	473.684
486.449	466.956	479.998	470.547	474.99	472.646	474.032	477.266	474.834	472.43	476.012	472.239	477.067	474.24	476.076	474.235	472.925	475.555	474.934	474.335	475.102	469.996	474.044	477.339	473.284	477.209	481.246	470.074	475.95	471.609	474.036	475.366	473.094	475.302	476.999	473.13	474.783	471.009	463.958	484.031	459.972	487.918	466.349	483.089	468.761	481.025	474.044	476.221	474.038	474.352
486.184	467.328	479.763	470.968	474.7	473.001	474.098	477.922	474.876	473.093	475.997	472.88	477.123	474.898	476	474.837	472.923	476.223	475.007	474.993	475.028	470.597	473.793	477.763	472.959	477.549	480.604	470.061	475.71	472.016	473.898	475.944	472.904	475.83	477.084	473.797	474.164	471.065	463.269	483.958	460.044	488.597	465.915	483.415	468.14	481.112	473.941	476.859	473.788	474.764
485.891	467.676	479.133	470.988	474.063	472.996	474.01	478.528	474.948	473.754	475.453	472.982	477.042	475.523	476.033	475.5	473.002	476.891	474.924	475.561	474.677	470.887	473.403	478.079	473.04	478.209	479.958	469.988	475.106	472.065	473.26	475.995	472.358	476.076	477.062	474.454	473.885	471.548	462.606	483.932	459.656	488.859	465.753	483.948	467.911	481.568	473.422	477.041	473.379	475.06
485.506	467.938	478.485	470.994	473.925	473.582	473.788	479.065	475.021	474.416	474.994	473.202	476.821	476.041	475.789	475.903	473.074	477.56	474.702	476.04	474.132	470.966	473.103	478.433	472.86	478.696	479.311	469.919	474.999	472.596	473.033	476.458	471.696	476.015	476.826	474.907	473.78	472.203	462.095	484.211	459.165	489.069	465.174	483.999	467.714	482.047	473.013	477.304	473.049	475.433
485.239	468.283	478.029	471.189	473.899	474.228	473.223	479.138	475.093	475.077	474.888	473.845	476.206	476.061	475.173	475.961	473.099	478.221	474.174	476.184	473.889	471.547	472.756	478.753	472.519	479.066	478.677	469.931	474.994	473.231	472.83	476.945	471.224	476.17	476.22	474.973	473.803	472.883	461.831	484.649	458.923	489.63	464.537	484.023	467.101	482.112	473.048	477.98	473.008	476.011
484.979	468.652	478.018	471.824	473.97	474.883	472.919	479.484	475.141	475.741	474.932	474.506	476.002	476.487	475.076	476.533	472.978	478.851	473.971	476.613	473.782	472.176	472.4	479.07	472.14	479.326	478.057	470.031	474.976	473.867	472.19	476.991	471.024	476.666	476.068	475.491	473.854	473.56	461.572	485.066	458.916	490.285	464.001	484.238	466.932	482.626	473.004	478.655	472.991	476.606
484.595	469.012	477.51	471.96	474.046	475.537	472.817	480.041	475.089	476.384	475.006	475.17	476.018	477.135	474.764	476.889	472.479	479.027	474.028	477.272	473.784	472.842	472.093	479.429	471.825	479.667	477.999	470.615	474.489	474.017	472.036	477.52	470.557	476.874	475.803	475.895	473.918	474.237	461.053	485.246	458.981	490.966	463.828	484.748	466.648	483.017	472.659	479.013	472.588	476.927
484.049	469.117	477.048	472.147	474.075	476.185	472.245	480.121	474.917	476.947	475.084	475.834	475.958	477.754	474.17	476.96	472.001	479.206	474.11	477.93	473.836	473.508	471.752	479.754	471.535	480.044	477.729	470.979	474.006	474.17	471.772	477.936	470.221	477.214	475.212	475.972	473.991	474.913	460.831	485.706	459.061	491.645	463.488	485.095	465.965	482.989	471.978	479.006	472.244	477.263
483.411	469.073	477.025	472.782	474.02	476.821	471.927	480.452	474.306	476.99	475.065	476.492	475.556	478.019	474	477.532	471.96	479.839	474.025	478.535	473.898	474.173	471.405	480.073	471.14	480.312	477.106	470.984	473.997	474.812	471.135	477.975	470.005	477.676	475.071	476.494	474.063	475.589	460.515	486.083	459.076	492.324	462.957	485.261	465.323	483.055	471.315	479.012	471.916	477.597
482.776	468.996	476.539	472.961	473.503	476.963	471.848	481.02	474.047	477.39	474.818	476.924	474.995	478.116	473.961	478.156	471.461	480.017	473.783	479.074	473.967	474.837	471.086	480.42	470.827	480.664	476.478	470.991	473.984	475.447	471.045	478.567	469.538	477.891	474.794	476.878	474.128	476.266	459.951	486.235	458.864	492.794	462.827	485.826	464.961	483.397	471.014	479.405	471.566	477.909
482.14	468.935	476.068	473.155	473.068	477.188	471.265	481.095	474.015	478.017	474.193	476.957	474.973	478.75	474.048	478.823	471.003	480.234	473.134	479.045	474.039	475.501	470.754	480.746	470.549	481.052	476.045	471.201	473.863	475.97	471.033	479.223	469.224	478.248	474.217	476.957	474.185	476.943	459.987	486.895	458.329	492.951	462.427	486.118	464.905	484.031	470.973	480.07	471.198	478.249
481.503	468.889	476.013	473.766	473.001	477.792	470.983	481.451	474.017	478.673	474.048	477.498	474.589	479.015	474.058	479.491	470.972	480.874	472.525	479.076	474.106	476.165	470.414	481.069	470.155	481.299	476.002	471.811	473.252	476.002	471.032	479.88	468.982	478.68	474.067	477.487	474.207	477.622	459.935	487.512	458.025	493.421	461.936	486.318	464.247	484.058	470.991	480.75	470.957	478.688
481.188	469.262	475.546	473.953	473.063	478.434	471.02	482.103	473.641	478.952	474.01	478.132	473.991	479.06	473.767	479.874	470.442	481.004	471.964	479.17	474.167	476.83	470.064	481.403	469.85	481.674	475.512	471.966	472.997	476.416	470.401	480.016	468.524	478.966	474.027	478.1	474.151	478.284	459.738	488.034	457.895	494.002	461.819	486.89	463.956	484.447	470.532	480.97	471.051	479.356
480.885	469.653	475.07	474.135	473.119	479.085	470.932	482.703	473.082	479.049	474.028	478.791	473.99	479.702	473.207	480.002	469.998	481.217	471.89	479.745	474.2	477.497	470.048	481.981	469.558	482.074	475.05	472.155	472.95	477.037	469.74	480.029	467.915	479.002	474.078	478.763	473.997	478.922	459.155	488.156	457.937	494.683	461.361	487.125	463.857	485.023	470.056	481.176	470.777	479.777
480.574	470.035	474.99	474.738	473.078	479.735	470.608	483.053	473.046	479.662	473.513	478.94	473.639	479.997	473.092	480.542	470	481.872	471.554	480.061	474.171	478.159	470.027	482.588	468.899	481.991	474.982	472.757	473.034	477.686	469.148	480.06	467.329	479.037	473.542	478.973	473.388	478.988	458.939	488.631	458.018	495.362	460.927	487.381	463.202	485.043	470.031	481.824	470.416	480.118
479.994	470.071	475.007	475.381	472.609	479.993	470.006	483.107	472.659	479.928	473.117	479.204	473.03	480.037	472.739	480.852	469.461	481.996	470.979	480.144	474.058	478.778	469.659	483.031	468.376	482.117	474.999	473.389	473.053	478.329	469.057	480.652	467.078	479.49	472.925	479.036	473.039	479.316	458.96	489.32	458.093	496.042	460.81	487.948	462.976	485.494	469.48	481.981	470.063	480.42
479.357	470.022	474.912	475.901	471.996	480.074	469.932	483.692	472.099	480.024	473.05	479.78	472.997	480.66	472.21	480.992	469.027	482.228	470.905	480.735	473.508	478.946	469.063	483.11	467.966	482.403	474.924	473.918	472.989	478.929	468.617	480.925	466.705	479.833	472.261	478.957	472.983	479.943	459.044	490.009	458.154	496.722	460.279	488.12	462.803	486.001	468.817	482.005	469.74	480.779
478.722	469.942	474.301	475.935	471.349	479.985	469.632	484.053	472.058	480.641	472.529	479.961	472.651	480.975	472.094	481.541	468.992	482.859	470.562	481.059	473.186	479.292	468.397	483.06	467.755	482.888	474.322	473.958	472.375	478.965	468.007	481.014	466.212	480.024	472.095	479.467	472.349	479.981	458.941	490.63	458.128	497.401	459.966	488.489	462.155	486.038	468.136	481.972	469.414	481.123
478.085	469.897	474.013	476.373	471.1	480.369	468.982	484.067	471.675	480.924	471.915	480.013	472.021	481.012	471.733	481.849	468.442	483.049	469.955	481.121	472.996	479.738	467.733	482.966	467.275	483.062	473.996	474.353	472.062	479.307	467.319	480.954	465.533	479.94	471.778	479.82	472.047	480.342	458.638	491.069	457.803	497.818	460.01	489.179	461.981	486.556	468.047	482.58	469.069	481.422
477.482	469.918	473.902	476.988	470.91	480.837	468.328	483.991	471.112	481.031	471.254	479.947	471.372	481.005	471.221	482.007	467.797	483.097	469.91	481.727	472.492	479.903	467.271	483.182	466.614	483.02	473.842	474.944	472.001	479.908	467.108	481.426	465.174	480.291	471.265	479.968	471.981	480.937	458.022	491.141	457.345	498.101	459.884	489.775	461.727	486.996	467.688	482.917	468.756	481.844
477.101	470.279	473.974	477.646	470.364	480.936	467.689	483.969	471.045	481.631	471.1	480.453	471.035	481.309	471.086	482.541	467.127	483.026	469.589	482.057	472.188	480.26	466.914	483.533	465.953	482.942	473.881	475.593	471.406	479.959	466.825	481.852	464.846	480.671	471.102	480.477	471.342	480.999	457.899	491.738	457.117	498.5	459.482	490.079	461.079	487.043	467.119	483.04	468.308	482.091
476.806	470.642	474.05	478.303	470.124	481.34	467.071	484.045	470.668	481.92	470.825	480.863	471.016	481.932	470.72	482.845	466.459	482.947	468.985	482.102	471.993	480.722	466.675	483.999	465.397	483.063	473.938	476.241	471.074	480.27	466.258	482.019	464.471	480.965	470.77	480.808	470.687	481.006	457.901	492.425	456.738	498.848	458.951	490.243	460.982	487.637	467.052	483.652	467.637	482.032
476.574	471.005	474.107	478.959	470.047	481.9	466.974	484.598	470.122	482.037	470.267	481.017	470.405	481.993	470.239	483.034	465.794	482.922	468.931	482.698	471.505	480.901	466.094	484.051	464.941	483.343	474.009	476.888	471.025	480.862	465.58	481.97	464.165	481.345	470.262	480.955	470.1	481.058	457.966	493.116	456.239	499.075	458.948	490.928	460.663	488.003	466.631	483.941	466.968	481.954
476.193	471.265	474.071	479.61	470.086	482.546	466.722	484.992	470.055	482.62	469.614	480.982	469.771	482.008	470.098	483.546	465.135	482.978	468.616	483.036	471.203	481.256	465.428	483.992	464.784	483.854	474.081	477.535	471.051	481.504	465.165	482.214	463.83	481.693	470.058	481.474	470.039	481.672	458.044	493.805	455.561	498.986	459.009	491.618	460.001	488.022	466.003	484.018	466.411	482.048
475.873	471.581	473.68	479.899	469.75	482.954	466.076	484.997	469.688	482.932	469.171	481.169	469.125	481.98	469.724	483.874	465.042	483.552	468.011	483.089	470.997	481.708	464.761	483.916	464.333	484.026	474.14	478.183	470.815	481.931	465.009	482.756	463.455	481.996	469.998	482.069	469.619	481.947	458.108	494.496	455.228	499.289	459.04	492.295	460.002	488.697	465.312	483.951	466.007	482.382
475.627	471.966	473.185	480.074	469.196	483.191	465.44	485.022	469.1	483.037	469.055	481.717	469.046	482.553	469.187	484.051	464.751	483.929	467.941	483.687	470.523	481.962	464.266	484.142	463.673	483.956	474.185	478.831	470.216	482.059	464.475	482.924	463.145	482.364	470.051	482.718	469	482.019	458.138	495.182	454.95	499.726	458.914	492.93	459.624	488.993	465.103	484.418	465.752	482.833
475.248	472.228	473.081	480.603	468.54	483.145	465.008	485.248	468.44	482.975	468.562	481.96	468.758	482.954	468.52	483.968	464.144	483.998	467.618	484.031	469.936	482.014	463.895	484.498	463.013	483.882	474.122	479.471	469.576	482.011	463.849	482.957	462.808	482.705	469.541	482.904	468.325	481.967	457.957	495.815	454.574	500.213	458.356	493.067	459.024	489.067	464.849	484.87	465.311	483.057
474.902	472.517	472.695	480.898	467.886	483.07	464.977	485.865	468.127	483.288	467.977	482.048	468.162	483.097	468.194	484.269	463.484	483.97	466.991	484.073	469.322	481.989	463.704	484.979	462.421	483.993	473.837	479.88	469.135	482.172	463.231	482.998	462.452	483.025	469.211	483.244	468.103	482.392	457.469	496.056	453.951	500.41	457.96	493.361	459.008	489.735	464.244	485.003	464.64	483.003
474.664	472.896	472.14	481.032	467.234	482.981	464.456	486.019	468.027	483.844	467.314	481.961	467.511	483.043	467.996	484.746	463.097	484.236	466.954	484.689	469.129	482.456	463.117	484.992	461.924	484.271	473.265	479.987	469.048	482.728	462.966	483.538	462.121	483.378	469.012	483.697	467.921	482.902	456.971	496.229	453.28	500.521	457.95	494.052	458.57	489.977	463.563	484.974	463.97	482.932
474.266	473.172	471.483	480.959	466.58	482.941	463.82	486.03	467.448	484.058	466.651	481.926	466.855	482.97	467.501	485.058	463.024	484.843	466.646	485.027	468.784	482.836	462.513	485.023	461.957	484.925	473.118	480.459	468.576	482.937	462.965	484.183	461.781	483.71	468.534	483.93	467.313	483.101	457.027	496.917	452.599	500.575	458.033	494.743	458.023	490.142	463.136	485.22	463.398	483.045
473.913	473.492	471.15	481.268	466.198	483.208	463.165	485.945	466.821	484.119	466.192	482.132	466.199	482.891	466.886	485.143	462.446	484.934	465.988	485.008	468.317	483.118	462.025	485.266	461.908	485.525	472.864	480.864	467.997	483.013	462.904	484.726	461.428	484.036	467.949	483.982	466.651	483.104	456.986	497.573	451.916	500.575	458.021	495.409	457.836	490.781	462.998	485.788	462.931	483.348
473.955	474.128	470.968	481.761	466.004	483.691	462.514	485.95	466.158	484.065	466.018	482.664	465.548	482.923	466.215	485.11	462.108	485.265	465.363	485.035	467.652	483.067	461.811	485.706	461.768	486.053	472.333	481.072	467.347	482.943	462.415	484.898	461.042	484.389	467.316	483.947	465.975	483.042	456.727	498.017	451.234	500.545	457.872	495.999	457.817	491.461	462.444	485.903	462.753	483.804
474.019	474.763	470.461	481.906	465.551	483.962	462.039	486.146	465.498	483.987	465.573	482.855	465.111	483.171	465.546	485.041	462.014	485.839	464.998	485.325	466.988	482.998	461.517	486.073	461.209	486.147	471.707	481.048	467.126	483.36	462.044	485.331	460.99	484.975	467.04	484.434	465.299	482.962	456.086	498.052	450.553	500.487	457.232	496.046	457.859	492.151	462.112	486.285	462.42	484.127
474.071	475.385	470.177	482.269	464.991	484.043	462.031	486.785	464.836	483.917	465.204	483.156	465.021	483.75	464.877	484.968	461.442	485.918	464.955	485.941	466.325	482.923	461.003	486.253	460.911	486.501	471.061	480.982	466.917	483.817	461.841	485.898	460.963	485.573	466.991	485.027	464.623	482.894	455.977	498.627	449.885	500.349	457.016	496.505	457.926	492.839	461.971	486.872	461.962	484.343
473.8	475.824	470.005	482.747	464.337	483.962	461.551	486.96	464.174	483.859	464.966	483.643	464.534	483.905	464.209	484.896	461.099	486.26	464.356	486.026	465.66	482.9	460.994	486.855	460.783	487.025	470.413	480.935	466.386	483.985	461.862	486.589	460.608	485.931	467.032	485.649	463.948	482.867	455.663	499.067	449.341	500.054	457.014	497.181	458.004	493.526	462.045	487.561	461.768	484.816
473.431	476.132	469.502	482.962	463.682	483.913	461.065	487.132	463.511	483.882	465.022	484.294	464.144	484.16	463.539	484.841	460.971	486.84	463.711	486.016	465.235	483.17	460.962	487.468	460.209	487.12	470.157	481.315	465.769	483.989	461.929	487.279	460.206	486.244	466.58	485.949	463.277	482.904	455.015	499.262	448.925	499.614	456.978	497.858	458.079	494.214	461.667	487.865	461.413	485.133
472.968	476.311	468.909	483.01	463.234	484.126	461.019	487.75	463.139	484.209	464.857	484.762	464.047	484.721	462.868	484.842	461.03	487.505	463.053	485.928	464.948	483.605	460.768	487.997	459.978	487.531	469.953	481.78	465.219	484.043	462.003	487.968	459.957	486.672	465.994	486.005	463.086	483.425	454.321	499.264	448.789	499.032	456.439	498.006	458.15	494.901	461.218	488.121	460.957	485.35
473.01	476.921	468.287	482.98	462.996	484.605	460.563	487.956	462.973	484.746	464.378	484.979	463.566	484.88	462.295	484.98	460.742	487.865	462.4	485.965	464.58	483.925	460.28	488.17	460.006	488.185	469.459	482.037	465.081	484.564	462.081	488.656	460.039	487.353	465.375	485.984	462.791	483.817	453.628	499.239	448.334	498.706	456.002	498.247	458.189	495.592	461.05	488.643	460.768	485.82
472.969	477.494	468.118	483.473	462.605	484.846	460.073	488.128	462.482	484.868	464.144	485.402	463.139	485.118	462.024	485.474	460.21	488.014	462.021	486.262	464.029	483.995	459.907	488.453	459.906	488.785	468.861	482.083	464.703	484.865	462.142	489.346	459.763	487.772	465.043	486.408	462.272	483.955	452.935	499.193	447.674	498.571	456.008	498.93	458.143	496.27	460.589	488.856	460.384	486.121
472.746	477.967	467.779	483.841	462.275	485.164	460.018	488.733	461.902	484.909	463.828	485.737	462.985	485.685	461.679	485.776	460.076	488.549	462.022	486.905	463.411	483.971	459.763	488.965	459.523	489.077	468.213	482.026	464.183	485.02	462.152	490.036	459.377	488.11	464.998	486.988	462.104	484.465	452.244	499.131	446.994	498.595	455.384	499.014	457.977	496.881	460.172	489.158	459.938	486.364
472.32	478.173	467.298	484.096	462.021	485.577	459.583	488.946	461.266	484.912	463.389	485.945	463.003	486.323	461.324	486.064	459.71	488.835	461.44	486.978	463.1	484.376	459.242	489.141	458.948	489.156	467.567	481.948	463.535	484.956	462.05	490.659	458.909	488.387	465.023	487.603	461.778	484.816	451.553	499.066	446.402	498.844	454.705	499.022	457.365	496.966	459.902	489.677	459.996	487.033
471.93	478.406	466.64	484.019	461.633	485.827	459.078	489.094	460.92	485.415	463.102	486.373	462.887	486.818	461.004	486.478	459.209	488.989	461.044	487.243	462.774	484.721	458.925	489.503	458.989	489.818	466.92	481.913	463.172	485.237	461.564	490.96	458.906	489.053	464.62	487.972	461.266	484.977	450.862	498.997	445.969	499.265	454.059	499.036	457.097	497.378	459.97	490.362	459.893	487.593
471.774	478.887	465.983	483.959	461.275	486.135	458.99	489.692	460.758	486.007	462.984	486.915	462.349	486.928	461.003	487.09	458.939	489.522	461.002	487.868	462.441	485.034	458.946	490.17	458.965	490.442	466.304	481.94	462.969	485.71	461.222	491.308	458.956	489.735	464.039	488.027	461.104	485.49	450.172	498.928	445.942	499.927	454.014	499.677	456.905	497.861	460.039	491.054	459.642	488.036
471.389	479.138	465.338	483.927	460.971	486.539	458.998	490.329	460.75	486.67	463.061	487.578	462.051	487.359	460.943	487.648	458.858	490.141	460.442	487.974	462.12	485.382	459.024	490.836	458.863	491.012	466.109	482.427	462.512	485.879	460.902	491.649	459.036	490.415	463.434	488.017	460.755	485.813	449.481	498.864	445.935	500.571	453.605	500.021	456.313	497.956	460.045	491.701	459.077	488.183
470.948	479.331	465.129	484.402	461.016	487.167	458.954	490.889	460.815	487.332	462.645	487.861	461.898	487.917	460.533	487.951	458.899	490.812	460.052	488.246	461.787	485.716	458.993	491.451	458.26	491.068	465.79	482.804	462.177	486.216	460.501	491.931	459.09	491.098	463.084	488.381	460.268	485.996	448.789	498.808	445.741	501.024	452.955	500.14	456.106	498.423	459.524	491.895	458.865	488.681
470.799	479.809	464.809	484.785	460.91	487.68	458.351	490.926	460.894	487.993	462.286	488.184	461.961	488.573	460.207	488.299	458.977	491.481	460.009	488.861	461.448	486.043	458.816	492	457.951	491.445	465.362	483.083	461.95	486.693	460.146	492.308	458.924	491.643	462.759	488.723	460.093	486.504	448.096	498.764	445.101	501.052	452.26	500.085	455.862	498.872	459.147	492.269	458.843	489.352
470.446	480.099	464.382	485.079	460.501	487.97	457.996	491.316	460.984	488.652	462.021	488.575	462.036	489.229	459.883	488.634	459.051	492.15	459.461	488.95	461.113	486.379	458.266	492.12	457.895	492.092	464.717	483.004	462.038	487.341	459.976	492.82	458.578	492.06	462.43	489.057	459.73	486.8	447.403	498.758	445.078	501.619	451.568	500.008	455.274	499.031	458.927	492.785	458.893	490.024
469.943	480.251	463.725	485.003	460.193	488.317	457.811	491.916	461.076	489.311	461.63	488.834	462.099	489.885	459.52	488.917	459.109	492.82	459.021	489.196	460.786	486.705	457.955	492.473	457.968	492.753	464.071	482.94	461.846	487.772	460.071	493.506	458.062	492.258	462.049	489.387	459.264	486.995	446.724	498.826	445.093	502.274	450.877	499.922	454.601	498.987	459.002	493.477	458.959	490.696
470.001	480.885	463.067	484.942	459.879	488.643	457.837	492.575	461.153	489.971	461.269	489.154	462.106	490.543	459.133	489.272	459.105	493.491	458.857	489.805	460.454	487.026	457.961	493.137	458.04	493.414	463.424	482.896	461.37	487.982	459.682	493.851	457.91	492.78	462.021	489.959	458.95	487.488	446.085	498.991	444.979	502.905	450.185	499.834	454.163	499.188	459.055	494.169	459.03	491.366
469.961	481.472	462.408	484.894	459.522	488.913	457.885	493.233	461.214	490.633	460.95	489.551	461.728	490.858	458.901	489.746	458.749	493.832	458.875	490.461	460.063	487.353	458.039	493.803	458.105	494.075	463.141	483.315	461.145	488.4	459.312	494.19	457.951	493.463	462.015	490.567	458.857	488.102	446.043	499.632	444.406	503.186	449.492	499.762	454.062	499.761	458.922	494.71	459.098	492.037
469.797	481.998	462.12	485.336	459.15	489.259	457.949	493.89	461.174	491.293	461.024	490.206	461.272	491.096	458.968	490.415	458.274	494.068	458.933	491.121	459.978	487.894	458.011	494.436	457.998	494.709	462.841	483.692	460.836	488.737	458.981	494.537	458.032	494.144	461.659	490.996	458.889	488.78	445.645	499.928	443.76	503.329	448.798	499.715	453.519	500.039	458.442	494.961	459.139	492.71
469.322	482.15	461.804	485.692	458.909	489.711	458.023	494.545	460.908	491.786	460.875	490.699	461.094	491.547	459.043	491.084	458.004	494.526	459.012	491.78	460.003	488.512	457.859	495.032	457.611	495.013	462.464	483.942	460.406	488.962	458.622	494.857	458.097	494.826	461.07	491.031	458.964	489.455	445.101	500.082	443.076	503.343	448.102	499.7	452.892	500.152	458.089	495.365	459.102	493.356
468.932	482.384	461.451	485.949	458.969	490.366	458.092	495.202	460.438	492.119	460.47	491.006	460.714	491.816	458.946	491.623	457.982	495.133	459.08	492.441	459.667	488.868	457.262	495.1	456.996	495.046	462.188	484.315	460.156	489.366	458.249	495.204	458.055	495.458	460.472	491.041	459.04	490.131	445.042	500.702	442.394	503.296	447.438	499.867	452.202	500.124	457.949	495.911	458.869	493.925
468.815	482.905	461.111	486.329	459.033	491.021	458.156	495.859	459.784	492.009	460.161	491.356	460.291	492.05	458.56	491.949	458.053	495.801	459.108	493.1	459.269	489.182	456.98	495.454	456.97	495.694	461.89	484.667	459.855	489.709	457.953	495.624	457.765	495.967	460.059	491.341	459.099	490.807	444.587	501.015	441.713	503.235	447.032	500.28	451.514	500.055	458.034	496.601	458.359	494.109
468.394	483.116	460.962	486.837	458.982	491.587	458.194	496.517	459.276	492.148	459.829	491.679	460.089	492.507	458.136	492.264	458.088	496.47	459.071	493.759	458.909	489.528	457.033	496.117	457.002	496.348	461.51	484.928	459.442	489.924	458.04	496.311	457.28	496.179	459.773	491.714	459.102	491.484	443.954	501.141	441.034	503.16	446.865	500.892	450.827	499.982	458.096	497.294	457.951	494.356
467.953	483.306	461.043	487.493	458.612	491.917	458.164	497.169	458.909	492.518	459.471	491.974	459.725	492.791	457.886	492.722	457.742	496.828	458.561	493.915	458.958	490.193	456.945	496.731	457.083	497.008	461.216	485.277	459.13	490.313	457.79	496.764	456.976	496.526	459.463	492.07	458.728	491.817	443.262	501.094	440.355	503.078	446.985	501.577	450.139	499.91	457.847	497.763	457.978	495.024
467.846	483.834	460.692	487.808	458.204	492.223	458.064	497.797	459.002	493.177	459.108	492.332	459.304	493.025	457.903	493.393	457.321	497.115	458.118	494.156	459.023	490.856	456.59	497.052	457.023	497.645	460.924	485.628	458.955	490.808	457.421	497.114	457.048	497.207	459.01	492.333	458.283	492.104	442.572	501.018	439.676	502.998	446.633	501.87	449.45	499.855	457.411	498.084	458.05	495.693
467.472	484.092	460.307	488.124	457.892	492.604	457.511	497.933	458.864	493.664	458.968	492.841	459.032	493.475	457.973	494.062	457.08	497.523	457.963	494.723	459.035	491.478	455.984	497.099	456.67	497.971	460.556	485.907	459.031	491.457	457.056	497.416	456.866	497.761	458.984	492.921	457.931	492.515	441.883	500.942	438.996	502.924	446.179	502.106	448.761	499.86	457.125	498.439	458.057	496.342
466.969	484.223	459.91	488.467	457.937	493.26	457.175	498.255	458.512	493.992	459.058	493.504	458.985	494.054	458.048	494.73	456.696	497.809	458.008	495.366	458.712	491.872	455.942	497.718	456.058	498.02	460.244	486.245	458.72	491.778	456.736	497.786	456.513	498.114	458.953	493.512	457.902	493.148	441.192	500.872	438.315	502.871	446.025	502.67	448.222	500.044	456.763	498.808	457.906	496.947
466.877	484.779	459.913	489.102	458.008	493.914	457.04	498.749	458.107	494.306	458.691	493.825	459.008	494.656	458.124	495.399	456.319	498.104	458.064	496.024	458.286	492.164	455.599	498.033	456.013	498.639	459.945	486.596	458.318	492.054	456.4	498.135	455.983	498.239	458.681	493.94	457.954	493.825	440.509	500.917	437.639	502.894	446.05	503.336	448.033	500.599	456.287	499.055	457.373	497.078
466.514	485.033	459.967	489.761	458.082	494.568	456.527	498.906	457.942	494.799	458.306	494.148	458.564	494.87	458.144	496.069	456.072	498.517	458.065	496.68	457.885	492.471	455.003	498.093	455.672	498.97	459.591	486.884	457.937	492.44	456.03	498.432	455.847	498.815	458.232	494.196	458.032	494.501	440.121	501.246	437.103	503.076	445.867	503.844	447.605	500.883	455.596	498.974	456.967	497.328
465.883	484.991	460.048	490.418	458.13	495.225	456.201	499.226	458.004	495.46	457.908	494.475	458.187	495.205	457.984	496.626	455.695	498.815	457.608	496.902	457.895	493.137	454.961	498.714	455.051	499.028	459.267	487.21	457.833	493.023	455.723	498.865	455.42	499.051	457.929	494.57	458.101	495.177	439.982	501.808	437.066	503.707	445.302	504.071	447.048	500.997	455.223	499.276	456.91	497.939
465.319	485.08	460.095	491.077	457.901	495.712	456.07	499.715	458.069	496.121	457.966	495.139	457.889	495.642	457.614	497.047	455.341	499.121	457.19	497.154	457.946	493.802	454.59	499.056	454.391	498.989	458.958	487.551	457.84	493.675	455.219	499.038	454.748	499.005	457.981	495.239	458.141	495.854	439.423	501.966	436.591	503.986	444.618	503.996	446.363	500.929	454.899	499.686	456.366	498.064
464.949	485.358	459.974	491.622	457.534	496.09	455.582	500.011	457.924	496.652	458.029	495.804	457.942	496.3	457.209	497.281	455.112	499.511	457.058	497.665	458.019	494.466	453.941	499.154	454.06	499.289	458.63	487.812	457.896	494.327	454.553	498.991	454.197	499.144	458.052	495.907	458.14	496.532	438.781	501.986	435.955	504.081	444.192	504.225	446.116	501.404	454.558	500.151	455.978	498.344
464.89	485.931	459.597	491.988	457.138	496.32	455.011	500.161	457.576	497.055	458.089	496.465	458.013	496.956	456.872	497.602	454.735	499.905	456.609	497.874	458.094	495.129	453.274	499.089	454.042	499.914	458.249	488.124	457.964	494.978	454.159	499.295	453.922	499.565	457.999	496.508	457.711	496.877	438.2	502.046	435.275	504.012	443.981	504.717	445.775	501.767	453.875	500.169	455.923	498.957
464.363	486.04	459.194	492.263	456.831	496.658	454.353	500.145	457.187	497.294	457.735	496.847	458.093	497.61	456.609	498.022	454.237	500.17	456.205	498.13	458.14	495.795	452.607	499.015	453.418	500.053	457.835	488.481	458.036	495.628	453.847	499.722	453.728	500.078	457.728	496.996	457.325	497.2	438.084	502.619	434.595	503.938	443.482	504.921	445.347	502.023	453.18	500.14	455.334	499.154
463.73	486.022	458.966	492.672	456.552	497.041	453.696	500.079	456.862	497.618	457.348	497.165	458.112	498.268	456.188	498.264	453.565	500.184	456.068	498.646	458.113	496.43	451.941	498.934	452.775	500.086	457.802	489.129	458.105	496.279	453.502	500.134	453.054	500.163	457.269	497.196	457.013	497.518	437.64	502.935	433.918	503.903	442.859	504.938	445.145	502.471	452.487	500.081	454.681	499.241
463.096	485.939	459.044	493.329	456.117	497.283	453.04	500.006	456.601	498.026	456.941	497.433	457.885	498.739	455.861	498.606	452.894	500.14	455.626	498.869	457.794	496.912	451.273	498.877	452.114	500.016	457.804	489.778	458.162	496.93	452.814	500.175	452.374	500.159	456.907	497.491	456.661	497.849	437.044	503.069	433.244	503.938	442.247	504.988	444.781	502.871	451.796	500.001	454.007	499.233
462.493	485.994	458.79	493.751	456.006	497.77	452.385	499.929	456.203	498.268	457.032	498.095	457.458	499.056	455.621	499.04	452.224	500.079	455.224	499.122	457.375	497.178	450.616	498.907	451.453	499.94	457.843	490.427	458.204	497.583	452.124	500.145	451.69	500.11	456.735	497.994	456.319	498.182	436.354	502.989	433.084	504.468	441.92	505.517	444.28	503.175	451.105	499.918	453.334	499.187
461.975	486.172	458.43	494.089	456.082	498.406	451.728	499.868	455.881	498.619	456.91	498.631	457.181	499.38	455.211	499.259	451.555	500.006	455.099	499.62	456.955	497.394	450.024	499.05	450.796	499.92	457.905	491.075	458.184	498.235	451.434	500.085	451.009	500.039	456.26	498.181	455.984	498.517	435.665	502.949	432.782	504.863	441.914	506.173	443.589	503.174	450.414	499.836	452.662	499.13
461.939	486.771	457.972	494.343	455.795	498.89	451.072	499.843	455.635	499.08	456.596	499.047	456.857	499.734	454.9	499.641	450.885	499.933	454.677	499.961	456.761	497.875	450.022	499.701	450.144	499.957	457.97	491.722	457.937	498.721	450.745	500.011	450.327	499.965	455.902	498.488	455.648	498.873	435.201	503.16	432.229	505.02	441.996	506.864	442.9	503.126	449.723	499.76	451.99	499.063
461.576	487.041	457.919	494.936	455.303	499.068	450.417	499.871	454.977	499.008	456.195	499.283	456.49	500.116	454.651	500.138	450.215	499.869	454.131	500.172	456.368	498.148	449.634	499.971	450.063	500.54	458.04	492.369	457.52	499.077	450.056	499.937	449.646	499.895	455.749	499.007	455.324	499.207	435.042	503.7	431.552	504.967	442.075	507.554	442.212	503.058	449.03	499.699	451.32	498.992
460.964	487.06	457.962	495.594	454.659	499.018	450.128	500.308	454.433	499.095	455.872	499.636	455.834	500.051	453.98	500.148	449.544	499.817	453.468	500.16	455.938	498.381	449.05	500.052	449.744	500.896	458.105	493.017	457.194	499.337	449.367	499.87	448.963	499.834	455.276	499.182	455.006	499.541	434.545	503.986	431.161	505.229	441.654	507.878	441.525	502.98	448.336	499.655	450.649	498.921
461.003	487.695	458.045	496.251	454.21	499.217	449.834	500.704	454.011	499.349	455.599	500.07	455.178	499.981	453.31	500.116	448.872	499.827	452.807	500.108	455.776	498.886	449.021	500.691	449.178	501.015	458.163	493.665	456.874	499.668	448.676	499.814	448.279	499.81	454.931	499.514	454.674	499.994	433.94	504.084	431.016	505.772	441.287	508.216	440.837	502.912	447.641	499.637	449.978	498.849
461.004	488.313	458.1	496.91	453.904	499.588	449.448	500.936	453.796	499.852	454.936	499.995	454.522	499.906	452.64	500.051	448.328	500.017	452.147	500.04	455.395	499.151	448.621	500.962	448.518	500.967	458.207	494.314	456.56	500.068	447.985	499.811	447.624	499.884	454.777	500.073	454.116	500.16	433.25	504.025	430.474	505.977	441.026	508.612	440.149	502.873	446.953	499.708	449.307	498.783
460.957	488.911	458.039	497.511	453.728	500.116	449.186	501.326	453.366	500.135	454.394	500.103	454.173	500.27	451.973	499.967	447.951	500.44	451.488	499.961	454.972	499.378	448.063	501.077	448.136	501.221	458.196	494.962	455.917	499.999	447.385	499.988	447.014	500.093	454.13	500.113	453.439	500.16	432.56	503.943	429.853	506.004	440.643	509.088	439.459	502.879	446.346	499.936	448.635	498.726
460.41	488.975	457.729	497.98	453.074	500.144	448.889	501.697	452.706	500.182	453.965	500.375	453.854	500.651	451.305	499.884	447.688	500.801	450.829	499.882	454.816	499.937	448.015	501.698	448.051	501.796	458.08	495.548	455.393	500.094	446.9	500.339	446.936	500.693	453.462	500.087	452.762	500.098	431.87	503.906	429.176	505.919	440.076	509.274	439.149	503.316	445.847	500.34	447.962	498.677
459.795	488.978	457.308	498.207	452.42	500.13	448.48	501.98	452.042	500.136	453.759	500.856	453.559	501.04	450.637	499.806	447.376	501.131	450.169	499.807	454.31	500.128	447.602	501.961	447.499	501.961	457.71	495.961	455.017	500.398	446.764	500.84	446.595	501.034	452.794	500.011	452.086	500.025	431.281	504.009	428.499	505.909	439.441	509.191	438.823	503.744	445.9	501.027	447.288	498.651
459.183	489.014	456.93	498.459	451.764	500.072	447.871	501.958	451.38	500.077	453.3	501.032	452.923	500.993	449.967	499.749	446.997	501.43	449.508	499.743	453.645	500.136	446.973	502.008	446.891	502.016	457.319	496.221	454.753	500.814	446.382	501.134	445.97	501.101	452.128	499.922	451.41	499.949	431.055	504.525	428.123	506.264	439.048	508.718	438.44	504.116	445.833	501.601	446.615	498.658
458.955	489.473	456.731	498.933	451.11	499.993	447.312	502.029	450.718	500.007	452.648	500.976	452.394	501.089	449.297	499.74	446.712	501.812	448.846	499.707	452.98	500.073	446.312	501.99	446.231	501.959	456.95	496.465	454.342	501.041	445.933	501.381	445.944	501.751	451.461	499.84	450.734	499.881	430.662	504.856	427.963	506.828	438.77	508.304	437.751	504.09	445.623	502.047	445.946	498.704
458.888	490.079	456.346	499.182	450.457	499.911	446.968	502.457	450.057	499.936	452.187	501.211	452.034	501.409	448.642	499.797	446.376	502.147	448.186	499.712	452.317	500	446.052	502.387	446.116	502.484	456.712	496.884	453.693	500.967	445.77	501.909	445.557	502.038	450.792	499.768	450.056	499.857	430.137	505.014	428.061	507.502	438.454	507.947	437.063	504.031	445.08	502.221	445.313	498.903
458.972	490.713	455.971	499.457	449.804	499.828	446.977	503.063	449.394	499.873	451.883	501.604	451.758	501.852	448.083	500.101	445.986	502.43	447.535	499.809	451.653	499.926	445.915	502.913	445.815	502.904	456.354	497.17	453.257	501.198	445.353	502.162	444.981	502.129	450.121	499.755	449.452	499.959	429.449	504.934	427.719	507.911	437.958	507.673	436.376	503.953	444.983	502.765	445.002	499.357
459.018	491.348	455.775	499.985	449.149	499.755	446.947	503.62	448.732	499.817	451.671	502.086	451.334	502.11	447.913	500.637	445.711	502.826	447.113	500.192	450.988	499.872	445.306	502.965	445.296	503.192	455.956	497.412	452.915	501.542	444.956	502.454	445.027	502.807	449.501	499.89	449.019	500.32	429.155	505.348	427.173	508.119	437.945	507.036	435.688	503.881	444.983	503.414	444.924	499.981
458.999	491.944	455.233	500.159	448.494	499.696	446.569	503.931	448.067	499.811	451.007	502.081	450.675	502.077	447.939	501.285	445.37	503.153	446.879	500.716	450.393	500.009	445.081	503.388	444.637	503.215	455.738	497.846	452.693	502.017	444.788	503.03	445.004	503.461	448.948	500.172	448.769	500.764	428.826	505.744	426.494	508.046	438.018	506.343	434.999	503.859	444.785	503.96	445.029	500.642
458.39	491.96	454.576	500.194	447.836	499.657	446.237	504.262	447.469	499.944	450.343	502.031	450.02	502.002	447.852	501.852	444.973	503.423	446.995	501.368	449.927	500.302	444.943	503.921	443.973	503.206	455.404	498.149	452.123	502.087	444.17	503.148	444.829	503.985	448.927	500.819	448.392	501.029	428.397	506.046	425.815	507.968	438.104	505.652	434.394	503.973	444.296	504.161	444.671	500.995
458.023	492.268	453.916	500.155	447.179	499.678	445.914	504.59	446.947	500.233	449.68	501.95	449.363	501.932	447.38	501.996	444.719	503.831	446.758	501.799	449.854	500.883	444.341	504.115	443.309	503.167	454.995	498.372	451.472	502.047	443.481	503.154	444.173	504.024	448.911	501.453	447.718	500.941	427.709	505.963	425.293	508.082	437.806	505.154	434.012	504.393	443.915	504.461	444.049	501.135
457.9	492.867	453.256	500.096	446.562	499.81	445.574	504.887	446.827	500.747	449.014	501.892	448.706	501.878	446.728	501.967	444.372	504.153	446.325	502.05	449.366	501.039	443.693	504.152	442.646	503.111	454.784	498.857	450.823	501.966	442.79	503.102	443.509	504.027	448.864	502.04	447.228	501.178	427.247	506.181	425.055	508.549	437.413	504.835	433.713	504.775	443.771	505.003	443.379	501.063
457.958	493.5	452.598	500.029	446.011	500.118	445.2	505.221	446.518	501.086	448.421	502.011	448.242	502.148	446.125	502.1	443.962	504.414	445.669	501.953	448.702	501.004	443.024	504.109	441.983	503.05	454.351	499.078	450.172	501.904	442.102	503.027	443.022	504.201	448.24	502.075	446.873	501.532	426.941	506.603	424.66	508.899	436.983	504.601	433.405	505.125	443.215	505.151	442.709	500.982
458.03	494.136	451.94	499.958	445.898	500.702	444.91	505.635	445.972	501.214	447.916	502.281	447.889	502.52	445.962	502.6	443.716	504.819	445.24	502.196	448.039	500.925	442.358	504.033	441.321	502.985	453.704	499.047	449.559	501.926	441.413	502.952	443	504.852	447.953	502.447	446.673	501.991	426.564	506.899	424.131	509.059	436.799	504.009	433.055	505.433	442.981	505.58	442.04	500.915
458.102	494.772	451.281	499.895	445.877	501.318	444.973	506.291	445.841	501.731	447.812	502.811	447.688	502.983	445.973	503.249	443.339	505.135	444.996	502.632	447.43	501.013	441.691	503.963	440.659	502.92	453.059	498.967	449.08	502.215	440.724	502.883	442.46	504.976	447.867	503.02	446.22	502.218	426.247	507.255	423.452	508.988	436.275	503.757	432.744	505.899	443.023	506.26	441.374	500.924
458.075	495.399	450.622	499.844	445.889	501.899	445.058	506.944	445.52	502.074	447.458	503.109	447.11	503.008	445.912	503.858	442.916	505.426	445.105	503.284	446.954	501.264	441.024	503.915	439.996	502.861	452.49	499.026	448.827	502.629	440.032	502.849	442.012	505.217	447.244	503.056	445.881	502.561	425.932	507.631	422.772	508.934	435.632	503.766	432.249	506.138	442.869	506.862	441.109	501.342
457.896	495.888	449.961	499.829	445.399	502.047	445.139	507.598	444.951	502.192	446.963	503.279	446.52	503.038	445.455	504.059	442.966	506.095	444.882	503.803	446.889	501.859	440.358	503.94	439.333	502.809	452.019	499.266	448.622	503.051	439.412	502.993	441.931	505.872	446.97	503.443	445.682	503.047	425.548	507.991	422.282	509.127	435.079	504.088	431.56	506.127	442.443	507.122	440.9	501.817
457.33	495.966	449.387	499.999	444.939	502.27	445.168	508.256	444.964	502.828	446.838	503.834	446.074	503.279	444.977	504.239	443.034	506.764	444.462	504.187	446.43	502.07	440.101	504.362	438.669	502.784	451.834	499.754	448.159	503.231	438.933	503.307	442.008	506.549	446.865	504.001	445.231	503.226	424.918	507.991	421.976	509.558	434.915	504.646	430.872	506.054	441.979	507.327	440.353	501.942
457.097	496.364	448.932	500.306	444.822	502.909	444.916	508.768	445.025	503.489	446.394	504.024	445.84	503.74	444.925	504.851	443.069	507.41	443.805	504.252	445.961	502.256	439.905	504.876	438.006	502.796	451.501	500.08	447.883	503.622	438.854	503.904	442.05	507.222	446.243	504.048	444.92	503.609	424.354	508.082	421.618	509.908	434.621	505.049	430.185	505.977	441.893	507.972	440.138	502.376
456.958	496.85	448.842	500.859	444.821	503.562	444.486	509.125	445.112	504.148	445.74	503.983	445.525	504.119	444.451	505.046	442.784	507.902	443.145	504.244	446.033	502.916	439.397	505.196	437.345	502.85	450.854	500.075	447.659	504.074	438.313	504.006	442.025	507.89	445.977	504.455	444.702	504.139	424.003	508.471	421.074	510.002	433.992	505.128	429.498	505.905	441.375	508.314	439.917	502.842
456.41	496.929	448.375	501.007	444.864	504.218	443.836	509.036	444.948	504.728	445.183	504.131	444.87	504.148	443.983	505.25	442.399	508.183	442.483	504.197	445.989	503.543	438.775	505.221	437.11	503.348	450.208	500.007	447.01	504.044	437.652	504.008	441.409	507.966	445.847	505	444.03	504.214	423.677	508.824	420.436	509.969	433.912	505.744	428.808	505.87	440.718	508.513	439.385	503.114
456.113	497.27	447.733	500.983	444.933	504.873	443.339	509.167	444.559	505.026	444.905	504.529	444.214	504.11	443.927	505.871	441.998	508.412	441.824	504.121	445.776	504.022	438.24	505.023	436.81	503.756	449.562	499.934	446.361	503.984	437.041	504.126	441.078	508.315	445.22	505.045	443.353	504.233	423.343	509.163	420.099	510.367	433.53	506.043	428.281	506.105	440.03	508.605	438.743	503.157
456.012	497.815	447.159	501.116	445.006	505.527	442.951	509.442	443.906	504.978	444.759	505.043	443.556	504.049	443.427	506.044	441.816	508.994	441.165	504.04	445.122	504.024	438.082	504.469	436.399	504.02	448.914	499.879	445.719	503.916	436.914	504.692	440.98	508.901	445.006	505.483	442.674	504.209	422.999	509.496	419.768	510.726	432.841	506.015	427.89	506.488	439.336	508.613	438.07	503.124
456.053	498.444	446.912	501.542	445.079	506.182	442.711	509.867	443.305	505.064	444.176	505.135	442.9	503.979	442.988	506.265	441.327	509.314	440.506	503.959	444.486	504.045	437.737	503.991	435.755	503.944	448.35	500.038	445.189	504.129	436.583	505.051	440.431	509.234	445.011	506.133	441.996	504.157	422.672	509.905	419.44	511.065	432.151	505.92	427.694	506.974	438.644	508.567	437.399	503.056
455.84	498.88	446.764	502.043	445.144	506.837	442.376	510.173	442.95	505.4	443.901	505.522	442.242	503.927	443.014	506.921	440.681	509.477	439.846	503.887	443.992	504.21	437.265	503.625	435.096	503.883	447.911	500.331	444.881	504.502	435.895	505.056	439.801	509.393	444.995	506.789	441.32	504.092	422.125	510.013	419.112	511.403	431.488	505.967	427.099	506.995	437.958	508.463	436.729	502.982
455.301	499.069	446.106	502.004	445.184	507.494	441.998	510.433	442.909	506.044	443.762	506.041	441.614	503.945	442.99	507.565	440.01	509.517	439.185	503.849	443.959	504.844	436.608	503.5	434.434	503.867	447.82	500.86	444.773	505.02	435.208	504.971	439.124	509.408	444.548	507.002	440.644	504.02	421.484	509.998	418.774	511.788	430.983	506.21	426.489	507.039	437.341	508.167	436.058	502.911
454.679	499.023	445.496	502.049	445.179	508.144	441.782	510.974	442.996	506.702	443.169	506.122	441.088	504.178	442.764	508.009	439.342	509.467	438.552	503.884	443.481	505.022	435.941	503.467	434.071	504.297	447.425	501.105	444.248	505.149	434.554	504.995	438.467	509.237	444.014	507.123	439.968	503.946	421.078	510.341	418.341	512.062	431.006	506.892	426.01	507.302	437.035	507.666	435.386	502.853
454.207	499.123	444.974	502.203	445.02	508.761	441.322	511.285	443.02	507.353	442.978	506.563	440.878	504.666	442.127	508.025	438.698	509.329	438.076	504.215	442.978	505.18	435.277	503.501	433.921	504.842	446.951	501.278	443.915	505.464	433.987	505.161	438.134	508.782	444	507.767	439.292	503.872	420.769	510.727	417.662	511.986	430.981	507.549	425.794	507.793	436.967	507.018	434.716	502.867
454.095	499.623	444.909	502.796	444.559	508.991	440.684	511.417	442.952	507.994	443.015	507.218	440.687	505.169	441.999	508.55	438.131	509.014	437.809	504.619	442.945	505.834	434.623	503.636	434.022	505.498	446.85	501.816	443.8	505.992	433.934	505.79	437.886	508.287	443.588	508.176	438.616	503.798	420.462	511.094	417.268	512.238	430.728	508.009	425.367	508.03	437.04	506.334	434.223	503.08
453.697	499.956	444.493	503.058	444.03	509.108	440.028	511.365	442.35	508.041	442.91	507.809	440.051	505.313	441.771	509.042	437.961	508.473	437.604	505.027	443.003	506.494	434.168	504.049	433.684	505.829	446.477	502.087	443.27	506.126	433.472	506.022	437.439	508.074	442.99	508.444	437.94	503.729	420.069	511.372	416.949	512.627	430.066	508.108	424.686	507.972	436.667	505.863	434.028	503.606
453.175	500.181	443.846	503.093	444.014	509.731	439.457	511.153	442.015	508.322	442.5	508.07	439.4	505.346	441.155	509.272	437.788	507.992	437.108	505.23	443.059	507.15	433.905	504.586	433.341	506.15	445.964	502.22	442.968	506.455	432.793	506.024	437.187	507.668	442.329	508.562	437.263	503.67	419.775	511.811	416.645	513.13	429.379	508.03	424.179	508.194	436.082	505.55	433.611	503.881
452.536	500.174	443.188	503.019	443.616	510.002	438.97	510.803	442.087	508.978	441.978	508.208	438.754	505.287	440.493	509.35	437.157	507.946	436.977	505.724	443.002	507.788	433.966	505.246	433.035	506.491	445.873	502.785	443.027	507.101	432.106	505.935	437.069	507.139	441.662	508.627	436.585	503.618	419.333	512.062	416.014	513.272	428.693	507.991	423.876	508.613	435.401	505.426	433.075	503.998
451.898	500.135	442.531	502.946	442.987	510.053	438.885	510.235	442.016	509.613	441.921	508.828	438.166	505.024	439.822	509.386	437.082	507.443	437.014	506.362	442.525	507.987	433.795	505.722	432.692	506.822	445.528	503.088	442.925	507.681	431.44	505.989	437.118	506.467	440.991	508.661	435.906	503.58	418.644	511.987	415.335	513.33	428.037	508.037	423.646	509.087	434.709	505.43	432.405	503.931
451.261	500.076	441.875	502.889	442.341	510.016	438.503	509.98	441.73	510.112	441.52	509.216	437.962	504.515	439.15	509.39	437.123	506.797	436.803	506.866	442.04	508.167	433.502	506.088	432.369	507.152	444.962	503.163	442.648	508.073	430.989	506.27	436.776	505.926	440.319	508.66	435.227	503.567	418.241	512.247	414.651	513.34	428.011	508.69	422.957	509.045	434.028	505.526	432.132	504.363
450.625	500.005	441.249	503.013	442.045	510.354	437.85	510.01	441.168	510.427	440.912	509.444	437.873	503.937	438.478	509.376	437.006	506.156	436.42	507.143	441.998	508.785	433.065	506.314	432.08	507.482	444.886	503.726	442.091	508.136	430.967	506.929	436.276	505.516	439.648	508.627	434.549	503.588	417.921	512.659	413.968	513.318	427.606	509.001	422.27	508.974	433.366	505.721	431.811	504.731
449.989	499.937	440.97	503.425	441.964	510.937	437.273	509.913	440.513	510.461	440.247	509.499	437.257	503.724	437.806	509.351	436.546	505.736	435.975	507.334	441.572	509.176	433.089	506.9	431.737	507.904	444.584	504.063	441.938	508.646	430.369	507.014	435.639	505.271	438.979	508.57	433.875	503.658	417.633	513.17	413.285	513.289	426.947	509.057	421.618	508.965	433.055	506.278	431.393	504.968
449.352	499.871	440.928	504.026	441.44	511.277	436.958	509.558	439.867	510.384	439.582	509.484	436.614	503.642	437.134	509.315	435.965	505.432	435.825	507.889	440.988	509.436	433.068	507.517	431.259	508.166	444.019	504.137	441.714	509.145	429.994	507.316	434.968	505.133	438.314	508.475	433.287	503.946	416.962	513.332	412.602	513.253	426.255	508.972	421.069	509.183	432.983	506.907	431.143	505.389
448.714	499.828	440.271	503.992	440.847	511.486	436.914	508.938	439.244	510.186	438.926	509.402	435.96	503.66	436.463	509.272	435.316	505.257	435.361	508.09	440.329	509.534	432.782	508.056	430.597	508.193	443.908	504.672	441.122	509.394	429.998	507.992	434.291	505.036	437.668	508.301	432.927	504.399	416.279	513.435	411.92	513.2	425.565	508.952	420.866	509.68	433.059	507.564	430.817	505.73
448.076	499.814	439.63	503.998	440.199	511.584	436.321	508.681	439.092	509.618	438.323	509.155	435.342	503.849	435.791	509.227	434.653	505.147	434.7	508.061	439.664	509.566	432.183	508.242	429.934	508.147	443.632	505.047	440.484	509.489	429.327	508.083	433.608	504.978	437.179	507.991	432.872	505.045	415.588	513.497	411.239	513.146	425.074	509.151	420.548	510.028	432.658	507.99	430.401	505.976
447.44	499.85	439.022	504.054	439.542	511.56	435.696	508.494	438.822	509.192	438.073	508.666	435.075	504.298	435.12	509.178	433.985	505.07	434.042	507.979	438.998	509.558	431.524	508.32	429.272	508.086	443.041	505.113	439.833	509.511	428.646	508.082	432.923	504.976	437.061	507.401	432.915	505.681	414.895	513.528	410.557	513.089	425.046	509.808	419.862	509.973	432.065	508.115	430.141	506.387
447.141	500.258	438.983	504.672	438.907	511.437	435.047	508.379	438.318	509.019	437.93	508.132	435	504.88	434.45	509.125	433.313	505.029	433.461	508.05	438.334	509.492	430.854	508.314	428.611	508.013	442.993	505.669	439.183	509.453	427.957	508.008	432.239	505.003	436.671	506.972	432.639	506.028	414.201	513.539	409.876	513.025	424.482	509.996	419.264	510.107	431.371	508.073	430.058	506.929
446.881	500.686	438.643	504.992	438.293	511.219	434.391	508.319	437.672	509.044	437.344	508.05	434.395	504.962	433.779	509.071	432.64	505.026	432.973	508.261	437.697	509.323	430.186	508.266	427.949	507.941	443	506.296	438.576	509.262	427.269	507.928	431.557	505.058	436.149	506.679	432.002	506.054	413.507	513.542	409.196	512.96	423.816	510.024	418.908	510.469	430.68	507.99	430.123	507.586
446.499	500.904	438.03	505.042	438.016	510.675	433.733	508.278	437.196	508.865	437.122	507.644	433.762	504.984	433.109	509.017	431.967	505.043	432.872	508.833	437.194	509.024	429.518	508.204	427.287	507.876	442.926	506.892	438.087	508.95	426.583	507.929	430.881	505.17	435.483	506.596	432.089	506.718	412.813	513.54	408.515	512.894	423.124	509.934	418.816	511.064	429.988	507.927	429.69	508
446.233	501.252	438.011	505.672	437.919	510.079	433.073	508.259	436.992	508.355	437.092	507.057	433.139	504.992	432.438	508.963	431.295	505.082	432.449	509.134	437.057	508.441	428.852	508.129	426.624	507.821	442.445	507.056	438.042	508.337	426.048	508.111	430.222	505.345	434.812	506.588	432.073	507.366	412.119	513.523	407.835	512.823	422.439	509.954	418.129	511.002	429.407	508.022	429.126	508.199
445.998	501.65	438.005	506.313	438.021	509.431	432.414	508.27	437.054	507.713	437.099	506.397	433.07	505.572	431.768	508.909	430.626	505.155	431.8	509.236	436.665	508.118	428.186	508.047	425.96	507.817	441.983	507.238	437.642	508.084	426.039	508.78	429.599	505.594	434.144	506.632	431.935	507.974	411.425	513.504	407.155	512.753	422.088	510.306	417.495	511.045	429.038	508.409	428.456	508.215
445.591	501.959	438.012	506.966	437.641	509.146	431.755	508.301	436.933	507.137	436.758	505.907	432.734	505.926	431.097	508.856	429.962	505.255	431.137	509.224	436.142	507.959	427.52	507.968	425.391	507.97	441.942	507.853	437.116	507.957	425.522	508.969	429.094	506.021	433.484	506.745	431.324	508.211	410.731	513.485	406.475	512.682	421.939	510.854	416.966	511.227	428.739	508.868	427.785	508.141
445.056	502.057	437.378	506.978	437.316	508.832	431.097	508.356	436.49	506.686	436.224	505.54	432.166	506.082	430.426	508.809	429.303	505.389	430.474	509.192	435.478	508.028	426.853	507.894	424.968	508.352	441.533	508.237	437.017	507.376	424.857	508.999	428.963	506.625	433.175	507.205	430.672	508.316	410.038	513.454	405.795	512.61	421.349	510.947	416.89	511.836	428.259	509.114	427.117	508.055
444.42	501.987	437.036	507.282	437.093	508.458	430.446	508.459	435.856	506.568	435.585	505.355	431.512	506	429.755	508.765	428.676	505.621	429.812	509.147	434.813	508.063	426.184	507.852	424.741	508.758	440.958	508.49	437.01	506.755	424.179	508.985	428.958	507.28	432.892	507.683	429.993	508.322	409.345	513.424	405.115	512.538	421.107	511.383	416.403	512.022	427.565	509.108	426.448	507.965
443.784	501.93	437.022	507.913	436.739	507.999	429.816	508.624	435.201	506.561	434.93	505.241	430.856	505.946	429.084	508.724	428.217	505.998	429.151	509.089	434.268	507.952	425.553	507.926	424.454	509.104	440.314	508.57	437.021	506.144	424.049	509.539	428.915	507.893	432.547	508.092	429.315	508.275	408.651	513.392	404.435	512.466	420.893	511.867	415.734	512.029	426.873	509.035	425.777	507.915
443.299	502.078	436.416	508.039	436.263	507.668	429.22	508.882	434.547	506.666	434.267	505.174	430.201	505.921	428.412	508.691	427.982	506.554	428.49	509.029	434.055	507.463	424.976	508.159	424.042	509.352	439.668	508.573	436.439	506.055	423.736	509.921	428.367	508.059	431.915	508.15	428.638	508.209	407.958	513.356	403.755	512.394	420.302	512.034	415.108	512.106	426.182	508.96	425.295	508.13
443.014	502.494	435.776	508.06	435.62	507.543	429.084	509.43	434.164	507.113	433.599	505.159	430.099	506.483	427.739	508.672	427.62	506.86	427.829	508.966	433.695	507.084	424.875	508.725	423.783	509.785	439.026	508.51	436.125	505.72	423.118	510.008	427.695	508.072	431.243	508.141	427.963	508.133	407.265	513.318	403.075	512.323	419.629	511.999	414.94	512.622	425.49	508.891	424.941	508.514
442.691	502.791	435.119	507.978	434.964	507.52	428.852	509.883	433.858	507.564	432.932	505.183	429.79	506.858	427.067	508.667	427.114	506.984	427.168	508.903	433.339	506.961	424.551	509.049	423.381	510.035	438.44	508.253	436.034	505.176	422.432	509.971	427.014	507.997	430.572	508.101	427.288	508.048	406.572	513.28	402.395	512.252	419.172	512.171	414.689	513.107	424.796	508.868	424.662	508.945
442.373	503.091	434.469	507.98	434.311	507.557	428.285	510.055	433.623	507.95	432.267	505.236	429.253	507.027	426.395	508.698	426.445	506.909	426.506	508.846	433.115	507.438	423.883	509.019	422.721	509.96	438.071	507.817	435.531	504.833	422.089	510.305	426.333	507.923	429.902	508.045	426.613	507.968	405.879	513.241	401.715	512.181	419.091	512.747	414.037	513.299	424.281	509.116	424.126	509.051
442.082	503.437	434.079	508.242	433.665	507.673	427.643	510.04	433.249	508.233	431.607	505.339	428.602	506.978	425.734	508.789	426.154	507.328	425.845	508.795	432.775	507.868	423.217	508.943	422.238	510.178	437.879	507.238	434.957	504.632	421.952	510.86	425.664	507.931	429.233	507.984	425.937	507.896	405.186	513.199	401.034	512.113	418.561	513.114	413.352	513.369	423.9	509.508	423.456	508.987
441.756	503.754	434.028	508.836	433.236	508.053	426.986	509.98	432.907	508.57	430.966	505.513	428.185	507.185	425.12	508.961	425.832	507.715	425.182	508.763	432.32	508.179	422.585	508.968	421.882	510.512	437.984	506.597	434.307	504.583	421.348	510.938	425.012	508.047	428.563	507.92	425.259	507.845	404.493	513.156	400.354	512.046	417.936	513.33	412.662	513.402	423.684	510.001	422.785	508.916
441.429	504.064	433.485	509.042	432.911	508.501	426.33	509.909	432.649	509.018	430.389	505.776	428.059	507.711	425.05	509.573	425.464	508.053	424.519	508.755	431.654	508.212	421.992	509.119	421.694	510.969	437.797	506.188	433.674	504.714	421.103	511.375	424.98	508.687	427.894	507.861	424.595	507.898	403.801	513.114	399.673	511.979	417.244	513.408	411.971	513.407	423.065	510.036	422.294	509.129
441.143	504.393	432.871	509.125	432.719	508.984	425.672	509.854	432.038	509.015	430.039	506.276	427.575	507.984	424.692	509.912	424.796	507.975	423.858	508.775	430.987	508.201	421.916	509.695	421.277	511.201	437.303	506.025	433.228	505.024	420.904	511.864	424.628	508.997	427.224	507.807	424.107	508.136	403.108	513.07	398.993	511.913	416.548	513.432	411.279	513.392	422.374	509.977	421.919	509.492
440.826	504.754	432.211	509.082	432.155	509.081	425.017	509.835	431.47	509.07	429.769	506.692	427.003	508.104	424.116	510.036	424.308	508.136	423.265	508.984	430.32	508.17	421.606	510.04	420.921	511.514	437.14	505.566	433.034	505.56	420.292	511.955	423.959	508.984	426.553	507.76	424.033	508.741	402.415	513.027	398.312	511.85	415.852	513.442	410.588	513.371	421.682	509.902	421.679	509.934
440.471	505.109	431.553	509.011	431.499	509.063	424.368	509.898	431.059	509.33	429.503	507.051	426.346	508.041	423.448	509.954	423.989	508.522	422.967	509.402	429.654	508.121	421.004	510.103	420.72	512.013	436.871	505.131	432.653	505.88	420.111	512.437	423.302	509.005	425.882	507.738	423.538	508.933	401.723	512.983	397.631	511.791	415.155	513.441	409.897	513.344	421.183	510.182	421.127	509.999
439.835	505.051	430.895	508.94	430.844	508.998	424.111	510.335	430.817	509.805	429.12	507.326	425.691	507.964	422.783	509.926	423.658	508.89	422.92	509.993	428.988	508.066	420.931	510.696	420.118	512.032	436.428	504.751	432.16	506.04	419.87	512.934	423.016	509.398	425.212	507.753	422.92	508.985	401.03	512.938	396.95	511.731	414.458	513.424	409.207	513.304	420.859	510.595	420.511	510.009
439.199	504.986	430.236	508.876	430.189	508.933	423.885	510.784	430.438	510.145	428.826	507.738	425.034	507.908	422.185	510.003	423.144	509.01	422.27	509.949	428.323	508.008	420.605	511.036	419.535	512.072	435.813	504.74	431.51	505.967	419.298	513.262	422.895	509.959	424.544	507.808	422.244	508.944	400.337	512.895	396.268	511.675	413.762	513.399	408.517	513.262	420.634	511.059	420.058	510.293
438.563	504.914	429.582	508.912	429.533	508.878	423.39	510.928	429.779	510.202	428.481	508.094	424.375	507.887	422.061	510.567	422.495	508.95	421.627	509.965	427.658	507.948	419.997	511.097	419.085	512.266	435.298	504.935	430.858	505.914	418.621	513.357	422.252	510.007	424.133	508.208	422.083	509.464	399.644	512.851	395.587	511.621	413.066	513.369	407.827	513.217	419.943	510.986	419.797	510.702
438.21	505.237	429.137	509.154	428.876	508.854	423.155	511.337	429.116	510.177	427.816	508.039	424.133	508.339	421.682	510.856	422.129	509.314	420.996	510.042	426.993	507.888	419.935	511.708	418.877	512.77	435.021	505.433	430.327	506.019	417.93	513.401	422.016	510.456	423.813	508.609	421.793	509.852	398.952	512.808	394.905	511.572	412.37	513.333	407.137	513.167	419.373	511.107	419.529	511.085
437.897	505.61	429.044	509.722	428.336	509.051	422.935	511.778	428.452	510.13	427.152	507.967	423.855	508.755	421.215	511.047	421.803	509.675	420.975	510.682	426.327	507.83	419.593	512.04	418.538	513.189	434.709	505.755	430.062	506.464	417.238	513.413	421.841	510.962	423.582	509.003	421.221	509.944	398.259	512.765	394.223	511.523	411.674	513.293	406.447	513.115	418.942	511.403	419.084	511.296
437.618	506.017	428.569	509.971	427.918	509.384	422.437	512.002	427.79	510.065	426.536	507.972	423.411	508.994	421.077	511.576	421.502	510.03	420.974	511.32	425.661	507.78	418.98	512.102	417.907	513.378	434.38	506.054	429.723	506.814	416.545	513.404	421.197	510.999	423.185	509.277	421.088	510.495	397.566	512.723	393.54	511.477	410.979	513.249	405.758	513.062	418.782	511.957	418.828	511.74
437.051	506.06	427.99	510.077	427.797	509.922	421.828	512.015	427.128	509.996	426.088	508.265	422.788	508.973	420.685	511.859	421.135	510.333	420.994	511.958	424.995	507.74	418.943	512.716	417.249	513.465	434.029	506.408	429.29	507.037	415.853	513.384	420.526	510.987	422.86	509.641	420.769	510.857	396.873	512.683	392.858	511.44	410.284	513.203	405.069	513.006	418.207	512.073	418.474	512.066
436.415	506.005	427.332	510.011	427.308	510.079	421.273	512.047	426.466	509.928	425.821	508.692	422.274	509.084	420.237	512.08	420.815	510.68	420.368	511.998	424.328	507.711	418.602	513.121	416.587	513.524	433.998	506.974	428.64	506.965	415.161	513.354	420.049	511.168	422.589	510.072	420.209	510.973	396.18	512.642	392.175	511.405	409.588	513.155	404.379	512.949	417.516	512.042	417.804	512.005
435.78	505.92	426.674	509.938	426.653	510.054	421.141	512.532	425.804	509.864	425.515	509.042	422.04	509.547	420.132	512.589	420.514	511.044	420.032	512.314	423.661	507.702	417.982	513.331	415.923	513.563	433.999	507.562	428.256	507.219	414.469	513.315	420.039	511.828	421.923	509.984	420.089	511.522	395.487	512.604	391.492	511.373	408.893	513.104	403.69	512.892	416.825	511.961	417.317	512.166
435.144	505.873	426.016	509.891	425.999	509.978	420.776	512.935	425.141	509.816	424.852	508.972	421.659	509.818	419.739	512.978	420.136	511.328	419.998	512.919	422.998	507.753	417.313	513.383	415.259	513.588	433.644	507.917	427.962	507.602	413.778	513.271	419.484	511.961	421.378	510.098	419.744	511.855	394.794	512.568	390.809	511.345	408.198	513.052	403.001	512.834	416.279	512.132	416.962	512.493
434.531	505.887	425.357	509.9	425.344	509.913	420.269	513.251	424.477	509.79	424.325	509.128	421.301	510.107	419.186	513.258	419.818	511.687	419.431	513.217	422.411	507.921	416.643	513.408	414.594	513.602	433.317	508.223	427.625	508.007	413.087	513.223	419.067	512.223	420.949	510.39	419.225	512.017	394.101	512.533	390.125	511.329	407.504	512.999	402.312	512.775	415.943	512.524	416.782	513.044
434.104	506.225	425.111	510.349	424.703	509.89	419.614	513.319	423.813	509.799	423.921	509.43	421.067	510.53	418.518	513.323	419.526	512.07	418.818	513.418	422.001	508.327	415.973	513.409	413.928	513.601	433.004	508.524	427.077	508.123	412.396	513.171	419.029	512.846	420.732	510.827	419.144	512.55	393.408	512.5	389.441	511.314	406.809	512.944	401.623	512.716	415.806	513.123	416.197	513.265
433.976	506.723	424.854	510.776	424.158	510.111	418.956	513.344	423.273	510.048	423.752	509.937	420.692	510.809	417.847	513.343	419.185	512.334	418.162	513.519	421.746	508.723	415.302	513.395	413.263	513.599	432.698	508.962	426.425	508.089	411.705	513.114	418.482	513.176	420.387	511.146	418.788	512.968	392.714	512.47	388.758	511.3	406.114	512.889	400.934	512.658	415.137	513.304	415.541	513.394
434.087	507.35	424.37	510.932	423.895	510.537	418.296	513.344	422.897	510.419	423.215	510.008	420.326	511.094	417.175	513.338	418.879	512.755	417.501	513.574	421.466	509.077	414.632	513.371	412.598	513.592	432.191	509.128	425.774	508.016	411.015	513.057	417.853	513.387	419.966	511.397	418.223	513.274	392.021	512.444	388.074	511.31	405.42	512.833	400.245	512.6	414.455	513.426	414.87	513.459
433.84	507.853	424.162	511.362	423.758	511.036	417.637	513.324	422.792	510.939	422.59	510.001	420.084	511.498	416.503	513.315	418.525	513.191	416.839	513.62	421.049	509.343	413.962	513.339	411.933	513.575	431.541	509.099	425.124	507.943	410.324	512.999	417.176	513.488	419.741	511.853	417.547	513.34	391.327	512.42	387.39	511.322	404.725	512.777	399.556	512.542	413.764	513.5	414.197	513.492
433.425	508.155	423.919	511.784	423.105	510.984	416.978	513.294	422.318	511.13	422.083	510.214	419.719	511.805	415.832	513.274	417.869	513.326	416.176	513.655	420.78	509.723	413.292	513.299	411.268	513.558	430.895	509.023	424.474	507.875	409.634	512.936	416.493	513.537	419.408	512.16	416.869	513.364	390.633	512.4	386.707	511.336	404.03	512.721	398.867	512.484	413.069	513.53	413.523	513.51
432.791	508.192	423.415	512.014	422.491	511.036	416.319	513.257	421.924	511.405	421.85	510.649	419.366	512.106	415.161	513.226	417.203	513.397	415.512	513.668	420.475	510.078	412.623	513.255	410.603	513.539	430.248	508.955	423.82	507.852	408.944	512.873	415.809	513.575	419.022	512.401	416.19	513.362	389.939	512.388	386.025	511.377	403.336	512.665	398.177	512.427	412.373	513.551	412.848	513.509
432.155	508.145	422.793	512.011	421.935	511.19	415.661	513.208	421.815	511.965	421.61	511.064	419.158	512.483	414.49	513.174	416.531	513.433	414.848	513.677	420.016	510.317	411.954	513.207	409.938	513.514	429.601	508.895	423.316	508.055	408.254	512.811	415.124	513.601	418.799	512.931	415.51	513.341	389.245	512.379	385.343	511.425	402.641	512.609	397.488	512.373	411.678	513.563	412.174	513.502
431.518	508.078	422.27	512.086	421.877	511.77	415.003	513.157	421.359	512.142	421.088	511.21	418.809	512.899	413.82	513.114	415.858	513.442	414.185	513.682	420.004	510.9	411.285	513.155	409.273	513.488	429.211	509.212	422.934	508.439	407.565	512.747	414.439	513.604	418.309	513.22	414.831	513.308	388.551	512.377	384.661	511.481	401.947	512.553	396.798	512.32	410.982	513.564	411.499	513.488
430.883	507.997	422.12	512.566	421.552	512.076	414.345	513.104	420.972	512.406	420.864	511.658	418.356	513.264	413.15	513.051	415.185	513.431	413.521	513.675	419.981	511.501	410.617	513.1	408.608	513.46	428.894	509.603	422.696	508.811	406.875	512.683	413.753	513.604	417.655	513.348	414.153	513.268	387.857	512.387	383.984	511.574	401.252	512.497	396.109	512.266	410.286	513.557	410.825	513.467
430.247	507.933	421.732	512.954	421.006	512.155	413.688	513.044	420.857	512.99	420.637	512.089	417.713	513.403	412.481	512.986	414.512	513.409	412.857	513.667	419.715	511.973	409.948	513.044	407.944	513.431	428.663	510.074	422.383	509.134	406.185	512.618	413.068	513.599	416.984	513.384	413.475	513.217	387.164	512.411	383.309	511.678	400.557	512.443	395.419	512.216	409.59	513.546	410.151	513.443
429.635	507.927	421.219	513.242	420.934	512.747	413.031	512.983	420.308	513.221	420.139	512.21	417.061	513.491	411.812	512.917	413.839	513.382	412.193	513.657	419.335	512.203	409.28	512.986	407.279	513.398	428.056	510.147	421.997	509.41	405.495	512.554	412.383	513.584	416.313	513.397	412.797	513.163	386.471	512.447	382.637	511.802	399.862	512.389	394.729	512.168	408.895	513.529	409.477	513.414
429.139	508.164	420.563	513.311	420.588	513.139	412.374	512.92	419.661	513.341	419.919	512.683	416.404	513.551	411.143	512.846	413.167	513.347	411.53	513.638	418.991	512.496	408.612	512.927	406.615	513.365	427.408	510.148	421.733	509.798	404.805	512.49	411.697	513.567	415.641	513.394	412.12	513.105	385.778	512.495	381.982	511.995	399.168	512.335	394.039	512.122	408.199	513.509	408.803	513.381
428.879	508.584	419.903	513.333	419.965	513.33	411.717	512.856	418.997	513.379	419.645	513.153	415.744	513.581	410.474	512.775	412.495	513.307	410.866	513.619	418.778	513.034	407.944	512.865	405.95	513.332	426.76	510.098	421.413	510.128	404.115	512.427	411.012	513.547	414.969	513.369	411.443	513.042	385.094	512.61	381.346	512.237	398.473	512.283	393.349	512.076	407.504	513.484	408.13	513.347
428.74	509.089	419.242	513.332	419.311	513.391	411.06	512.79	418.332	513.376	419.008	513.333	415.084	513.598	409.805	512.702	411.823	513.264	410.203	513.599	418.215	513.277	407.276	512.804	405.286	513.296	426.112	510.033	421.018	510.379	403.425	512.364	410.327	513.519	414.297	513.337	410.766	512.978	384.47	512.843	380.736	512.528	397.778	512.233	392.659	512.036	406.809	513.457	407.456	513.31
428.102	509.08	418.58	513.312	418.655	513.431	410.404	512.723	417.667	513.359	418.349	513.421	414.424	513.606	409.137	512.628	411.151	513.216	409.539	513.573	417.57	513.422	406.608	512.742	404.622	513.26	425.465	509.964	420.762	510.773	402.735	512.302	409.643	513.492	413.626	513.3	410.089	512.912	383.944	513.201	380.182	512.914	397.082	512.183	391.968	512.002	406.114	513.429	406.783	513.269
427.465	509.038	417.919	513.276	417.997	513.448	409.747	512.656	417.002	513.333	417.682	513.469	413.764	513.607	408.468	512.553	410.479	513.166	408.876	513.546	416.907	513.494	405.94	512.68	403.957	513.223	424.818	509.897	420.46	511.114	402.045	512.241	408.958	513.462	412.955	513.255	409.413	512.844	383.893	513.79	379.764	513.432	396.387	512.133	391.278	511.967	405.418	513.397	406.109	513.228
426.83	508.964	417.259	513.231	417.339	513.44	409.091	512.588	416.338	513.296	417.014	513.485	413.104	513.6	407.799	512.479	409.808	513.115	408.213	513.518	416.241	513.537	405.272	512.618	403.293	513.186	424.169	509.842	420.064	511.348	401.355	512.182	408.273	513.428	412.285	513.206	408.737	512.775	383.471	514.047	379.459	514.022	395.692	512.088	390.587	511.938	404.724	513.362	405.436	513.186
426.193	508.906	416.599	513.183	416.681	513.424	408.434	512.52	415.674	513.252	416.346	513.489	412.444	513.586	407.131	512.405	409.137	513.06	407.55	513.49	415.574	513.564	404.604	512.556	402.629	513.148	423.52	509.802	419.801	511.774	400.665	512.123	407.589	513.393	411.615	513.154	408.06	512.705	382.953	514.244	379.316	514.684	394.996	512.044	389.896	511.913	404.029	513.327	404.763	513.143
425.594	508.944	415.939	513.128	416.023	513.4	407.778	512.451	415.01	513.202	415.677	513.485	411.784	513.57	406.462	512.33	408.466	513.003	406.886	513.459	414.906	513.571	403.936	512.494	401.965	513.109	422.87	509.801	419.427	512.063	399.974	512.066	406.904	513.358	410.944	513.098	407.384	512.635	382.857	514.913	379.321	515.362	394.301	512.002	389.204	511.895	403.334	513.291	404.09	513.098
425.06	509.143	415.28	513.069	415.365	513.369	407.122	512.383	414.347	513.148	415.009	513.468	411.124	513.549	405.794	512.256	407.795	512.947	406.223	513.425	414.238	513.57	403.268	512.433	401.3	513.07	422.328	510.017	418.777	512.005	399.283	512.012	406.22	513.321	410.275	513.041	406.708	512.565	382.883	515.598	379.393	516.038	393.605	511.959	388.513	511.881	402.639	513.254	403.417	513.052
424.892	509.621	414.621	513.009	414.707	513.334	406.465	512.316	413.684	513.091	414.341	513.445	410.465	513.526	405.125	512.183	407.124	512.888	405.56	513.392	413.571	513.562	402.6	512.373	400.636	513.031	421.89	510.356	418.328	512.175	398.593	511.96	405.536	513.282	409.605	512.982	406.032	512.494	382.954	516.288	379.528	516.708	392.909	511.923	387.822	511.875	401.944	513.215	402.744	513.007
424.682	510.025	413.962	512.945	414.05	513.292	405.809	512.249	413.022	513.031	413.673	513.417	409.805	513.498	404.456	512.112	406.453	512.829	404.897	513.358	412.903	513.547	401.932	512.313	399.972	512.991	421.765	510.83	417.982	512.483	397.902	511.909	404.851	513.242	408.935	512.921	405.356	512.423	383.041	516.977	379.709	517.367	392.213	511.891	387.13	511.879	401.25	513.176	402.071	512.96
424.048	509.977	413.304	512.878	413.393	513.248	405.152	512.182	412.359	512.967	413.005	513.383	409.145	513.47	403.787	512.04	405.783	512.769	404.235	513.323	412.235	513.527	401.264	512.254	399.308	512.952	421.421	511.118	417.775	513.006	397.211	511.858	404.167	513.202	408.266	512.859	404.679	512.354	383.107	517.668	379.885	518.027	391.517	511.859	386.439	511.891	400.555	513.136	401.398	512.913
423.452	510.04	412.645	512.811	412.737	513.202	404.495	512.116	411.697	512.903	412.338	513.347	408.486	513.44	403.118	511.97	405.112	512.71	403.572	513.286	411.568	513.503	400.596	512.197	398.644	512.913	420.962	511.312	417.257	513.267	396.519	511.817	403.483	513.16	407.596	512.797	404.003	512.285	383.082	518.339	380.05	518.689	390.821	511.832	385.748	511.915	399.86	513.095	400.725	512.865
422.935	510.207	411.987	512.742	412.08	513.153	403.839	512.052	411.035	512.838	411.67	513.309	407.827	513.406	402.449	511.9	404.441	512.65	402.909	513.249	410.901	513.475	399.927	512.142	397.98	512.874	420.809	511.812	416.625	513.414	395.828	511.776	402.799	513.119	406.927	512.733	403.326	512.216	382.943	518.985	379.555	518.886	390.124	511.808	385.058	511.955	399.166	513.054	400.052	512.818
422.885	510.777	411.329	512.672	411.424	513.101	403.182	511.988	410.373	512.77	411.003	513.264	407.167	513.371	401.78	511.835	403.77	512.59	402.246	513.212	410.234	513.445	399.259	512.086	397.316	512.835	420.488	512.118	415.975	513.478	395.136	511.736	402.115	513.076	406.258	512.67	402.65	512.149	382.297	519.027	379.216	519.229	389.428	511.791	384.369	512.016	398.471	513.013	399.379	512.771
422.549	511.067	410.67	512.602	410.767	513.049	402.525	511.926	409.711	512.702	410.336	513.22	406.508	513.337	401.11	511.769	403.1	512.53	401.583	513.174	409.567	513.412	398.59	512.034	396.651	512.797	420.023	512.257	415.322	513.52	394.444	511.701	401.43	513.034	405.589	512.606	401.973	512.084	381.995	519.414	378.992	519.682	388.731	511.774	383.683	512.096	397.777	512.972	398.706	512.724
421.98	511.128	410.012	512.531	410.111	512.995	401.868	511.864	409.049	512.634	409.669	513.174	405.849	513.299	400.441	511.704	402.429	512.47	400.921	513.136	408.9	513.374	397.921	511.984	395.987	512.759	419.877	512.809	414.669	513.55	393.752	511.673	400.746	512.992	404.919	512.543	401.296	512.02	381.888	519.998	378.523	519.898	388.034	511.767	382.999	512.196	397.082	512.93	398.033	512.677
421.917	511.695	409.354	512.46	409.455	512.94	401.21	511.804	408.387	512.565	409.003	513.125	405.19	513.26	399.771	511.644	401.758	512.41	400.258	513.098	408.233	513.336	397.252	511.937	395.323	512.721	419.509	513.18	414.015	513.565	393.059	511.647	400.062	512.949	404.25	512.48	400.62	511.956	381.217	520.007	378.211	520.264	387.338	511.77	382.332	512.374	396.387	512.889	397.36	512.631
421.647	512.048	408.696	512.389	408.799	512.883	400.553	511.748	407.726	512.496	408.336	513.075	404.531	513.222	399.101	511.586	401.087	512.352	399.595	513.059	407.567	513.297	396.583	511.889	394.659	512.684	418.887	513.345	413.361	513.568	392.367	511.621	399.378	512.907	403.58	512.418	399.942	511.896	381.005	520.468	377.962	520.692	386.641	511.774	381.697	512.631	395.693	512.847	396.687	512.585
421.088	512.105	408.038	512.318	408.143	512.826	399.895	511.693	407.064	512.427	407.669	513.025	403.872	513.183	398.43	511.529	400.417	512.294	398.932	513.02	406.9	513.256	395.914	511.844	393.994	512.649	418.239	513.396	412.706	513.562	391.674	511.614	398.694	512.865	402.911	512.355	399.265	511.838	380.85	521.001	377.498	520.931	385.944	511.791	381.127	512.981	394.998	512.806	396.014	512.54
420.961	512.609	407.38	512.247	407.487	512.769	399.237	511.638	406.402	512.359	407.003	512.974	403.213	513.143	397.76	511.473	399.746	512.236	398.27	512.982	406.234	513.213	395.244	511.809	393.33	512.615	417.589	513.423	412.052	513.555	390.982	511.608	398.01	512.823	402.241	512.296	398.587	511.782	380.173	521.071	376.89	520.947	385.248	511.819	380.76	513.538	394.304	512.766	395.341	512.495
420.744	513.081	406.722	512.177	406.831	512.711	398.58	511.585	405.74	512.29	406.336	512.922	402.554	513.102	397.089	511.423	399.075	512.18	397.607	512.943	405.567	513.17	394.574	511.773	392.665	512.581	416.939	513.425	411.398	513.54	390.289	511.604	397.326	512.782	401.572	512.237	397.91	511.727	379.488	521.005	376.288	520.988	384.552	511.855	380.697	514.188	393.609	512.726	394.668	512.451
420.158	513.31	406.064	512.108	406.175	512.653	397.921	511.539	405.078	512.224	405.67	512.869	401.895	513.061	396.418	511.379	398.404	512.126	396.944	512.904	404.901	513.127	393.904	511.739	392.001	512.547	416.288	513.414	410.744	513.519	389.596	511.619	396.642	512.741	400.902	512.179	397.232	511.675	378.8	520.912	375.942	521.472	383.858	511.916	380.784	514.867	392.914	512.686	393.995	512.409
419.537	513.436	405.405	512.039	405.519	512.595	397.263	511.494	404.416	512.157	405.003	512.816	401.236	513.02	395.747	511.335	397.732	512.072	396.282	512.865	404.234	513.081	393.234	511.711	391.336	512.517	415.638	513.396	410.09	513.498	388.904	511.641	395.957	512.701	400.232	512.122	396.554	511.631	378.111	520.833	375.916	522.104	383.166	511.99	380.967	515.533	392.22	512.647	393.322	512.368
418.904	513.518	404.747	511.97	404.863	512.537	396.605	511.449	403.754	512.091	404.337	512.762	400.577	512.979	395.075	511.295	397.061	512.018	395.619	512.828	403.568	513.035	392.563	511.69	390.672	512.489	414.988	513.367	409.436	513.473	388.212	511.671	395.273	512.662	399.562	512.068	395.875	511.587	377.442	520.913	375.991	522.782	382.474	512.077	380.63	515.844	391.525	512.61	392.648	512.328
418.266	513.567	404.088	511.904	404.207	512.479	395.946	511.409	403.092	512.026	403.67	512.709	399.918	512.938	394.404	511.259	396.39	511.967	394.956	512.79	402.902	512.989	391.893	511.671	390.007	512.46	414.338	513.331	408.783	513.445	387.521	511.722	394.589	512.625	398.891	512.016	395.197	511.546	377.027	521.266	376.069	523.459	381.795	512.229	380.283	516.166	390.83	512.574	391.975	512.288
417.627	513.6	403.43	511.839	403.551	512.422	395.287	511.373	402.429	511.963	403.004	512.656	399.259	512.897	393.731	511.232	395.718	511.92	394.293	512.753	402.236	512.942	391.222	511.654	389.342	512.435	413.689	513.293	408.129	513.414	386.832	511.789	393.904	512.588	398.221	511.965	394.518	511.512	376.901	521.907	375.722	523.842	381.132	512.433	380.075	516.611	390.135	512.537	391.301	512.252
416.988	513.622	402.771	511.775	402.895	512.365	394.628	511.342	401.767	511.902	402.338	512.602	398.6	512.855	393.059	511.206	395.046	511.873	393.63	512.715	401.57	512.896	390.552	511.654	388.677	512.413	413.039	513.249	407.476	513.383	386.145	511.875	393.22	512.551	397.55	511.917	393.838	511.483	376.985	522.587	375.353	524.174	380.49	512.694	379.631	516.98	389.44	512.503	390.628	512.219
416.348	513.627	402.112	511.711	402.239	512.308	393.968	511.311	401.104	511.84	401.671	512.549	397.941	512.815	392.387	511.181	394.374	511.827	392.968	512.679	400.903	512.849	389.881	511.659	388.012	512.393	412.39	513.202	406.822	513.35	385.464	512	392.535	512.52	396.88	511.873	393.159	511.457	376.661	522.915	375.091	524.516	379.988	513.155	379.057	517.142	388.745	512.471	389.954	512.185
415.708	513.629	401.453	511.649	401.583	512.253	393.309	511.285	400.442	511.782	401.005	512.497	397.282	512.776	391.714	511.175	393.703	511.782	392.305	512.644	400.237	512.802	389.21	511.664	387.347	512.376	411.741	513.152	406.169	513.314	384.793	512.162	391.85	512.49	396.208	511.832	392.48	511.433	376.138	523.076	374.742	524.999	379.722	513.737	378.367	517.101	388.05	512.441	389.28	512.154
415.068	513.629	400.794	511.591	400.927	512.199	392.649	511.271	399.779	511.725	400.338	512.445	396.623	512.737	391.042	511.172	393.03	511.745	391.642	512.61	399.571	512.755	388.54	511.693	386.682	512.362	411.093	513.1	405.516	513.278	384.136	512.371	391.166	512.46	395.537	511.793	391.8	511.426	376.103	523.666	374.248	525.341	379.674	514.414	377.68	517.019	387.355	512.411	388.606	512.127
414.428	513.616	400.134	511.534	400.271	512.144	391.99	511.258	399.115	511.671	399.672	512.393	395.964	512.697	390.369	511.171	392.358	511.708	390.979	512.575	398.905	512.708	387.87	511.73	386.017	512.356	410.444	513.046	404.862	513.242	383.498	512.639	390.481	512.434	394.866	511.755	391.12	511.421	376.091	524.321	373.585	525.494	379.844	515.088	376.993	516.941	386.66	512.384	387.932	512.104
413.789	513.602	399.475	511.477	399.614	512.091	391.33	511.249	398.452	511.618	399.005	512.341	395.305	512.66	389.697	511.185	391.685	511.671	390.316	512.541	398.239	512.662	387.201	511.771	385.351	512.352	409.796	512.992	404.209	513.204	383	513.107	389.796	512.412	394.194	511.73	390.44	511.416	375.946	524.93	372.903	525.529	379.81	515.647	376.306	516.876	385.964	512.363	387.258	512.081
413.149	513.586	398.815	511.424	398.958	512.04	390.67	511.248	397.789	511.566	398.338	512.292	394.646	512.624	389.025	511.209	391.013	511.642	389.653	512.511	397.572	512.616	386.535	511.85	384.686	512.354	409.147	512.935	403.556	513.165	382.668	513.677	389.11	512.393	393.522	511.705	389.761	511.438	375.414	525.345	372.221	525.525	379.589	516.07	375.616	516.867	385.269	512.342	386.583	512.063
412.509	513.565	398.155	511.374	398.301	511.991	390.01	511.259	397.125	511.522	397.672	512.244	393.987	512.589	388.353	511.241	390.34	511.616	388.989	512.482	396.906	512.57	385.872	511.947	384.021	512.368	408.499	512.877	402.903	513.125	382.509	514.339	388.425	512.376	392.851	511.68	389.081	511.463	374.767	525.554	371.539	525.481	379.085	516.247	375.184	517.198	384.573	512.325	385.909	512.052
411.87	513.543	397.495	511.327	397.645	511.942	389.35	511.275	396.461	511.479	397.005	512.196	393.328	512.554	387.682	511.287	389.667	511.593	388.326	512.453	396.24	512.525	385.212	512.062	383.356	512.392	407.851	512.82	402.25	513.086	382.582	515.024	387.74	512.368	392.178	511.672	388.402	511.49	374.089	525.676	370.87	525.351	378.852	516.729	374.856	517.62	383.877	512.313	385.234	512.044
411.23	513.517	396.835	511.28	396.988	511.893	388.691	511.294	395.797	511.437	396.338	512.149	392.668	512.522	387.013	511.352	388.994	511.571	387.663	512.426	395.573	512.481	384.564	512.232	382.692	512.424	407.203	512.761	401.597	513.046	382.725	515.698	387.055	512.365	391.506	511.667	387.726	511.556	373.397	525.725	370.338	525.048	378.486	517.063	374.53	517.921	383.182	512.305	384.56	512.041
410.591	513.49	396.174	511.238	396.331	511.849	388.032	511.336	395.133	511.396	395.671	512.103	392.009	512.492	386.345	511.432	388.321	511.56	387	512.402	394.907	512.438	383.937	512.458	382.029	512.473	406.555	512.702	400.944	513.006	382.87	516.341	386.369	512.366	390.834	511.664	387.05	511.627	372.704	525.706	369.938	524.607	377.795	517.037	374.093	518.253	382.486	512.304	383.885	512.046
409.952	513.462	395.513	511.201	395.674	511.807	387.375	511.389	394.468	511.366	395.004	512.062	391.349	512.463	385.681	511.536	387.647	511.556	386.336	512.38	394.241	512.395	383.346	512.77	381.371	512.566	405.907	512.643	400.291	512.965	382.786	516.862	385.684	512.383	390.162	511.68	386.375	511.706	372.013	525.648	369.794	524.032	377.104	516.952	373.961	518.61	381.79	512.309	383.211	512.06
409.313	513.43	394.852	511.167	395.017	511.765	386.717	511.445	393.803	511.339	394.336	512.02	390.69	512.435	385.022	511.667	386.974	511.552	385.673	512.358	393.574	512.353	382.898	513.25	380.732	512.714	405.259	512.584	399.638	512.925	382.351	517.111	384.999	512.412	389.49	511.702	385.709	511.846	371.327	525.55	369.305	523.725	376.469	517.017	374.373	518.994	381.094	512.323	382.537	512.083
408.674	513.397	394.191	511.134	394.36	511.724	386.064	511.534	393.138	511.312	393.669	511.979	390.03	512.414	384.369	511.823	386.301	511.56	385.009	512.34	392.907	512.313	382.601	513.813	380.147	512.986	404.611	512.525	398.985	512.885	381.941	517.402	384.316	512.455	388.818	511.731	385.053	512.016	370.666	525.35	368.645	523.58	375.924	517.256	374.801	519.26	380.399	512.352	381.864	512.116
408.034	513.365	393.53	511.102	393.702	511.689	385.413	511.643	392.473	511.294	393.002	511.94	389.37	512.395	383.734	512.041	385.628	511.577	384.345	512.33	392.241	512.275	382.531	514.475	379.988	513.512	403.962	512.467	398.331	512.845	381.954	518.088	383.635	512.528	388.149	511.79	384.407	512.218	370.226	524.945	367.963	523.548	375.822	517.821	375.145	519.588	379.705	512.393	381.191	512.165
407.395	513.33	392.869	511.086	393.045	511.658	384.767	511.773	391.808	511.282	392.334	511.907	388.71	512.376	383.123	512.31	384.955	511.6	383.681	512.32	391.574	512.237	382.628	515.134	379.82	513.984	403.314	512.409	397.678	512.806	382.031	518.775	382.966	512.651	387.48	511.858	383.792	512.497	369.925	524.422	367.284	523.592	375.421	518.107	375.414	519.984	379.012	512.447	380.521	512.238
406.757	513.294	392.207	511.071	392.387	511.628	384.13	511.939	391.143	511.276	391.666	511.875	388.05	512.367	382.539	512.628	384.283	511.639	383.018	512.313	390.907	512.199	382.776	515.786	379.19	514.026	402.666	512.351	397.025	512.766	382.015	519.428	382.314	512.842	386.813	511.937	383.245	512.879	369.645	523.925	366.64	523.735	374.941	518.323	375.996	520.208	378.324	512.55	379.854	512.336
406.118	513.258	391.545	511.056	391.729	511.6	383.502	512.139	390.478	511.274	390.999	511.842	387.39	512.361	382.021	513.05	383.611	511.689	382.354	512.316	390.24	512.166	382.966	516.429	378.998	514.503	402.018	512.295	396.372	512.728	381.833	520.028	382.05	513.372	386.157	512.082	382.776	513.348	369.065	523.774	366.082	524.06	374.823	518.886	376.363	520.685	377.666	512.732	379.2	512.492
405.479	513.221	390.883	511.053	391.071	511.576	382.911	512.427	389.812	511.279	390.331	511.817	386.729	512.358	381.631	513.582	382.941	511.751	381.69	512.322	389.573	512.135	382.7	516.798	378.815	514.983	401.369	512.24	395.719	512.691	381.261	520.134	381.736	513.739	385.513	512.264	382.502	513.961	368.457	523.876	365.935	524.622	374.344	519.107	376.556	521.34	377.05	513.017	378.584	512.734
404.84	513.184	390.222	511.056	390.413	511.56	382.374	512.79	389.147	511.303	389.662	511.795	386.069	512.37	381.339	514.177	382.275	511.845	381.026	512.335	388.906	512.105	382.371	517.131	378.182	515.009	400.721	512.184	395.066	512.654	380.918	520.474	381.354	513.931	384.883	512.485	382.389	514.617	368.033	524.291	365.666	525.034	373.966	519.414	376.596	522.029	377.012	513.649	378.024	513.065
404.201	513.146	389.56	511.066	389.754	511.545	381.887	513.216	388.482	511.326	388.994	511.775	385.41	512.389	381.205	514.835	381.612	511.96	380.363	512.365	388.239	512.076	382.035	517.463	378.012	515.488	400.072	512.129	394.412	512.618	380.797	521.045	381.029	514.403	384.323	512.838	382.376	515.29	367.794	524.781	365.03	525.093	374.012	520.105	376.53	522.711	376.654	513.967	377.865	513.675
403.562	513.108	388.898	511.08	389.096	511.53	381.572	513.781	387.818	511.359	388.326	511.758	384.75	512.416	381.182	515.504	380.955	512.1	379.701	512.405	387.571	512.052	381.703	517.805	377.856	515.982	399.424	512.078	393.759	512.583	380.198	521.131	380.934	514.995	383.892	513.309	382.472	515.962	367.385	525.051	364.94	525.68	373.901	520.719	376.355	523.361	376.049	514.064	377.88	514.31
402.924	513.069	388.237	511.107	388.438	511.533	381.378	514.391	387.156	511.423	387.657	511.747	384.092	512.47	381.223	516.173	380.312	512.298	379.04	512.458	386.904	512.032	381.372	518.141	377.211	515.999	398.775	512.029	393.105	512.551	379.915	521.533	381.007	515.676	383.583	513.88	382.622	516.624	366.695	525	364.63	526.072	373.546	521.079	375.994	523.929	375.823	514.692	377.958	514.909
402.285	513.03	387.576	511.151	387.779	511.538	381.288	515.037	386.494	511.489	386.989	511.746	383.438	512.549	381.337	516.836	379.695	512.556	378.381	512.542	386.236	512.013	381.041	518.465	376.567	516.001	398.126	511.979	392.452	512.519	379.741	522.045	381.068	516.357	383.546	514.543	382.792	517.282	366.005	524.926	363.961	526.138	372.945	521.171	375.377	524.09	375.744	515.364	377.348	514.947
401.646	512.992	386.916	511.195	387.121	511.544	381.346	515.692	385.834	511.568	386.32	511.745	382.792	512.68	381.493	517.49	379.134	512.924	377.74	512.7	385.569	511.998	380.712	518.849	376.06	516.14	397.477	511.932	391.798	512.488	379.144	522.126	380.793	516.784	383.619	515.201	382.971	517.938	365.408	525.04	363.28	526.077	373.009	521.86	374.711	524.114	375.752	516.059	376.708	514.957
401.007	512.953	386.257	511.257	386.463	511.567	381.45	516.34	385.181	511.695	385.652	511.753	382.273	512.993	381.667	518.14	378.77	513.462	377.199	512.965	384.901	511.99	380.239	519.032	376.009	516.757	396.828	511.886	391.145	512.463	378.925	522.595	380.376	517.094	383.77	515.855	382.971	518.583	364.953	525.355	362.6	526.008	372.971	522.512	374.065	524.064	375.798	516.754	376.115	515.024
400.368	512.914	385.602	511.348	385.805	511.597	381.596	516.983	384.533	511.843	384.984	511.773	381.871	513.393	381.854	518.786	378.551	514.072	376.993	513.52	384.233	511.986	379.575	518.939	375.553	516.957	396.178	511.845	390.491	512.438	378.674	523.024	380.09	517.467	383.953	516.502	382.72	519.011	365.089	526.033	361.922	525.94	372.782	523.048	373.971	524.655	375.862	517.446	375.981	515.631
399.73	512.875	384.947	511.443	385.148	511.632	381.781	517.617	383.892	512.013	384.316	511.799	381.747	513.828	381.97	519.443	378.547	514.74	376.645	513.797	383.565	511.987	379.175	519.256	375.055	517.126	395.529	511.805	389.837	512.414	377.989	522.989	379.728	517.783	383.703	516.826	382.067	519.031	364.99	526.666	361.263	526.005	372.161	523.097	373.666	525.139	375.933	518.139	375.977	516.276
399.091	512.837	384.297	511.562	384.492	511.692	381.92	518.255	383.265	512.237	383.649	511.837	381.353	514.098	381.848	519.916	378.67	515.397	376.27	514.026	382.898	511.994	378.843	519.604	374.939	517.734	394.879	511.764	389.183	512.398	377.353	523.061	379.364	518.1	383.232	517.01	381.413	519.021	364.681	527.208	360.987	526.419	371.952	523.584	373.064	525.436	376.008	518.83	375.942	516.85
398.452	512.799	383.656	511.726	383.838	511.761	382.013	518.898	382.685	512.553	382.983	511.892	380.904	514.358	381.226	519.959	378.828	516.05	376.016	514.508	382.23	512.013	378.572	519.956	374.965	518.38	394.229	511.733	388.529	512.383	376.953	523.369	379.066	518.474	383.027	517.538	381.011	519.272	364.059	527.501	360.903	527.028	371.728	524.102	372.38	525.53	376.079	519.523	375.366	516.947
397.813	512.762	383.026	511.924	383.184	511.839	381.424	518.957	382.155	512.939	382.317	511.957	380.893	515.011	381.074	520.471	378.995	516.7	375.994	515.113	381.563	512.04	378.136	520.255	375.033	519.04	393.579	511.702	387.875	512.371	376.894	524.001	378.709	518.799	382.999	518.155	380.984	519.917	363.396	527.687	360.291	527.302	371.076	524.28	371.692	525.574	376.144	520.215	375.113	517.359
397.174	512.725	382.407	512.15	382.539	511.966	381.084	519.262	381.734	513.441	381.656	512.049	380.945	515.665	380.84	520.904	378.56	516.894	375.971	515.689	380.896	512.076	377.926	520.723	375.052	519.703	392.929	511.674	387.22	512.368	376.273	524.076	378.228	518.965	382.974	518.743	380.385	520.003	362.717	527.818	359.634	527.433	370.434	524.135	371.002	525.57	376.201	520.909	374.922	517.831
396.536	512.689	381.803	512.421	381.9	512.122	381.043	519.86	381.472	514.032	381	512.176	381.032	516.319	380.222	520.964	378.161	517.158	375.513	515.922	380.231	512.13	377.983	521.39	374.618	519.918	392.279	511.65	386.566	512.37	375.939	524.432	377.552	518.871	382.466	518.915	380.021	520.32	362.029	527.907	358.954	527.471	370.043	523.744	370.317	525.493	376.221	521.603	374.358	517.934
395.897	512.653	381.278	512.818	381.275	512.32	380.468	519.971	381.315	514.666	380.359	512.358	381.121	516.973	380.065	521.482	378.047	517.718	375.202	516.281	379.568	512.205	378.057	522.056	374.099	520.075	391.628	511.632	385.912	512.377	375.863	525.04	377.08	519.226	382.146	519.297	379.982	520.955	361.337	527.96	358.273	527.425	369.997	523.086	369.657	525.315	376.159	522.288	374.12	518.366
395.258	512.619	380.821	513.284	380.689	512.602	379.846	520.002	381.31	515.327	379.748	512.603	381.178	517.63	379.807	521.897	377.556	517.877	374.928	516.661	378.908	512.307	377.942	522.61	373.938	520.675	390.978	511.619	385.258	512.402	375.219	525.075	376.819	519.752	381.975	519.814	379.347	521.007	360.644	527.989	357.614	527.27	369.407	522.96	369.138	524.994	375.962	522.873	373.909	518.822
394.619	512.585	380.476	513.842	380.157	512.957	379.198	519.961	381.389	515.984	379.172	512.922	381.186	518.278	379.213	521.973	377.128	518.147	374.521	516.868	378.262	512.463	377.624	523.044	373.94	521.319	390.327	511.608	384.605	512.437	374.957	525.496	376.793	520.433	382.057	520.48	378.689	520.977	359.95	527.996	357.124	526.955	369.098	523.259	369.027	524.364	375.349	522.974	373.348	518.92
393.98	512.552	380.286	514.465	379.767	513.465	379.07	520.494	381.516	516.636	378.828	513.463	380.93	518.833	379.073	522.492	376.894	518.698	374.089	517.2	377.647	512.692	377.199	523.266	374.011	521.98	389.676	511.604	383.953	512.487	374.807	526.031	376.87	521.113	381.733	520.826	378.018	520.885	359.256	527.981	357.06	526.322	368.968	523.84	368.579	524.127	375.111	523.412	373.101	519.367
393.34	512.522	380.18	515.11	379.585	514.067	378.791	520.873	381.69	517.277	378.672	514.064	380.451	519.062	378.805	522.889	376.922	519.356	373.708	517.637	377.075	513.011	376.868	523.595	374.088	522.641	389.026	511.615	383.306	512.576	374.121	526.029	376.958	521.793	381.298	521.084	377.354	520.936	358.563	527.953	356.588	526.035	368.37	523.938	368.186	523.847	374.873	523.849	373.012	519.958
392.701	512.494	380.185	515.769	379.533	514.709	378.23	520.956	381.865	517.919	378.728	514.722	379.813	519.061	378.223	522.982	376.992	520.025	373.635	518.294	376.871	513.593	376.629	524.031	374.085	523.298	388.375	511.627	382.682	512.726	373.462	526.049	377.053	522.471	381.089	521.526	377.013	521.327	357.87	527.913	355.982	525.921	368.109	524.367	368.054	523.299	374.283	523.963	373.062	520.625
392.062	512.465	380.266	516.423	379.655	515.354	378.045	521.465	381.948	518.513	378.911	515.363	379.223	519.111	377.564	522.942	377.077	520.693	373.669	518.948	376.838	514.213	376.187	524.25	373.943	523.846	387.725	511.647	382.127	513.029	372.991	526.259	377.102	523.153	380.707	521.807	376.925	521.968	357.179	527.847	355.301	525.978	367.892	524.838	367.596	522.907	374.131	524.466	372.643	520.929
391.422	512.44	380.384	517.073	379.823	515.989	377.982	522.061	381.666	518.917	378.796	515.792	378.927	519.455	377.104	523.154	377.083	521.363	373.815	519.554	376.992	514.859	375.863	524.59	373.377	523.963	387.076	511.688	381.941	513.537	372.949	526.907	376.908	523.686	380.31	522.08	376.995	522.634	356.491	527.755	354.62	526.044	367.316	524.954	367.019	522.729	373.848	524.928	372.059	521.041
390.783	512.416	380.545	517.714	379.938	516.573	378.043	522.716	381.322	519.212	378.317	515.97	378.849	520.018	376.942	523.75	376.848	521.81	374.268	519.897	376.442	514.944	375.644	525.034	373.134	524.362	386.426	511.733	381.795	514.023	372.419	527.224	376.546	524.09	380.078	522.518	376.636	522.922	355.808	527.64	353.94	526.079	366.647	524.931	366.347	522.792	373.266	525.234	371.393	520.943
390.143	512.397	380.724	518.351	379.61	516.886	377.57	522.887	380.971	519.504	378.139	516.438	378.251	520.078	377.002	524.408	376.314	521.977	374.764	520.164	376.087	515.237	375.186	525.238	373.056	524.909	385.778	511.79	381.173	514.056	371.772	527.38	376.12	524.315	379.696	522.807	376.121	523.081	355.131	527.488	353.262	526.071	366.12	525.116	366.095	523.34	372.573	525.261	371.12	521.357
389.504	512.377	380.892	518.989	379.296	517.21	377.139	523.137	380.704	519.973	377.826	516.82	377.957	520.447	376.808	524.84	376.086	522.446	375.226	520.449	376.04	515.847	374.867	525.585	373.08	525.566	385.135	511.886	380.958	514.491	371.082	527.389	375.818	524.69	379.313	523.096	376.047	523.676	354.492	527.239	353.096	525.541	365.869	525.704	365.766	523.736	371.878	525.253	371.02	521.929
388.864	512.361	381.005	519.634	378.987	517.546	376.95	523.685	380.163	520.1	377.343	517.089	377.942	521.099	376.262	524.972	376.009	523.015	375.348	521.096	375.463	515.93	374.658	526.044	372.762	526.068	384.496	512.004	380.967	515.136	370.438	527.184	375.525	525.082	379.07	523.523	375.612	523.902	354.073	526.832	352.792	525.076	365.944	526.388	365.392	524.031	371.183	525.218	371.091	522.593
388.224	512.355	380.634	519.892	378.647	517.912	376.989	524.322	379.502	520.063	376.685	517.019	378.03	521.753	376.104	525.476	376.086	523.683	375.363	521.751	375.096	516.227	374.203	526.235	372.255	526.432	383.861	512.14	381.063	515.783	370.095	526.753	375.08	525.308	378.687	523.81	375.125	524.087	354.026	526.188	352.32	524.711	366.024	527.078	365.129	524.437	370.49	525.16	370.676	522.969
387.584	512.348	380.186	520.101	378.124	518.012	377.053	524.976	378.842	519.978	376.021	516.952	378.023	522.386	375.788	525.826	375.586	523.89	375.273	522.389	375.034	516.833	373.892	526.611	371.598	526.504	383.239	512.327	381.047	516.41	369.988	526.157	374.807	525.722	378.314	524.105	375.007	524.685	353.514	525.84	351.65	524.763	366.045	527.734	364.77	524.826	369.797	525.097	370.113	523.161
386.944	512.344	380.078	520.632	377.492	517.956	377.072	525.629	378.18	519.912	375.356	516.899	377.918	522.996	375.264	525.975	375.231	524.215	374.905	522.885	374.47	516.967	373.667	527.098	370.948	526.436	382.653	512.596	380.92	516.982	369.392	526.03	374.518	526.109	378.066	524.524	375.014	525.337	352.907	525.73	351.207	525.091	365.504	527.932	364.301	525.104	369.104	525.032	369.442	523.125
386.304	512.357	379.662	520.904	377.128	518.304	376.649	525.879	377.552	519.921	375.114	517.376	377.311	523.048	375.12	526.483	375.025	524.663	374.459	523.14	373.846	517.005	372.998	527.066	370.356	526.234	382.107	512.934	380.293	517.008	368.737	526.01	374.09	526.318	377.687	524.81	374.885	525.851	352.25	525.866	350.922	525.591	365.207	528.304	363.613	525.038	368.412	524.966	368.774	523.036
385.665	512.373	379.099	521.024	376.812	518.641	376.224	526.126	377.079	520.23	374.797	517.739	376.972	523.364	374.794	526.853	374.565	524.892	374.01	523.307	373.184	516.958	372.332	527.006	370.012	525.714	381.765	513.474	379.664	517.018	368.16	525.932	373.855	526.848	377.322	525.111	374.309	525.967	351.855	526.4	350.561	525.84	364.983	528.753	362.926	524.967	367.719	524.906	368.105	522.96
385.025	512.393	378.444	520.951	376.53	518.968	376.069	526.612	376.812	520.631	374.386	517.967	376.951	524	374.269	527.07	374.255	525.232	373.884	523.907	373.079	517.513	371.68	526.95	369.978	525.102	381.583	514.069	379.041	517.024	368.064	525.342	373.472	527.276	377.062	525.514	374.12	526.431	351.71	527.023	350.173	526.193	364.488	529.112	362.367	525.057	367.025	524.855	367.434	522.914
384.387	512.441	378.144	521.299	376.096	519.275	375.654	526.855	376.585	521.034	374.142	518.39	376.345	524.037	373.602	526.993	374.065	525.668	373.45	524.263	372.777	517.882	371.182	527.173	370.02	524.472	381.538	514.71	378.988	517.638	367.645	524.932	372.819	527.472	376.69	525.81	373.866	526.869	351.813	527.639	349.85	526.653	363.84	529.212	362.06	525.468	366.33	524.819	367.145	523.337
383.752	512.511	377.937	521.765	375.896	519.76	375.247	527.106	376.089	521.24	373.816	518.73	375.981	524.316	373.197	527.215	373.608	526.049	372.819	524.449	372.204	517.991	370.894	527.589	369.732	523.957	381.669	515.346	378.983	518.268	367.07	524.71	372.14	527.545	376.338	526.122	373.312	527.1	352.352	527.895	349.868	527.335	363.145	529.212	361.719	525.912	365.64	524.871	366.826	523.729
383.119	512.603	377.438	521.917	375.92	520.416	375.089	527.586	375.975	521.753	373.403	518.98	375.969	524.948	373.03	527.715	373.032	526.242	372.16	524.514	371.55	517.96	370.699	528.086	369.199	523.75	381.822	515.977	379.03	518.914	366.387	524.784	371.457	527.571	376.073	526.509	372.652	527.067	352.864	528.2	349.929	528.015	362.449	529.169	361.222	526.173	365.202	525.162	366.431	524.034
382.514	512.796	377.163	522.3	376.006	521.069	374.687	527.894	375.998	522.384	373.141	519.389	375.39	525.021	372.588	528.123	372.361	526.284	371.498	524.532	371.126	518.197	370.034	528.124	368.581	523.766	382	516.602	378.437	518.966	366.114	525.294	370.773	527.553	375.698	526.849	371.976	526.999	353.258	528.621	350.007	528.694	361.756	529.104	360.533	526.199	365.027	525.7	365.773	523.961
382.09	513.128	376.947	522.744	376.074	521.723	374.162	528.068	375.786	522.874	372.809	519.721	375.004	525.29	372.025	528.351	371.688	526.259	370.835	524.513	370.977	518.759	369.367	528.102	368.125	524.137	381.62	516.852	378.055	519.244	365.815	525.728	370.096	527.452	375.205	527.03	371.3	526.94	353.371	529.302	350.085	529.373	361.063	529.031	359.843	526.151	364.549	526.051	365.284	524.121
381.991	513.697	376.461	522.914	376.123	522.379	373.507	527.986	375.376	523.14	372.407	519.977	374.968	525.912	371.36	528.417	371.016	526.218	370.177	524.429	371.039	519.415	368.7	528.038	367.884	524.62	381.285	517.15	377.993	519.857	365.384	525.954	369.482	527.212	374.538	526.946	371.128	527.433	353.336	529.989	350.119	530.055	360.37	528.951	359.155	526.09	363.942	526.215	364.992	524.553
381.572	513.875	376.177	523.289	375.81	522.823	373.21	528.291	374.968	523.378	372.114	520.382	374.468	526.267	370.702	528.299	370.345	526.167	369.56	524.232	370.825	519.874	368.033	527.962	367.663	525.069	381.08	517.563	378.008	520.5	365.143	526.398	368.974	526.833	374.179	527.283	370.844	527.914	353.128	530.585	349.994	530.63	359.678	528.872	358.467	526.019	363.249	526.244	364.629	524.843
381.147	514.06	375.961	523.73	375.443	523.153	373.007	528.75	375.06	524.035	372.02	520.916	373.877	526.512	370.249	527.961	369.674	526.107	369.018	523.926	370.282	520.1	367.365	527.906	367.001	525.059	380.687	517.872	377.8	520.922	365.073	526.971	368.939	526.191	373.856	527.65	370.382	528.332	352.701	531.042	349.581	530.998	358.985	528.796	357.78	525.942	362.553	526.225	364.297	525.177
380.982	514.608	375.479	523.906	375.027	523.348	372.585	529.2	374.955	524.631	372.115	521.574	373.227	526.628	369.95	527.469	369.004	526.046	369	523.295	369.627	520.006	366.712	527.898	366.34	525.008	380.192	518.04	377.203	520.963	365.105	527.631	368.486	525.988	373.52	527.974	369.72	528.471	352.225	531.225	349.195	531.291	358.292	528.723	357.092	525.864	361.859	526.191	363.994	525.553
380.993	515.212	375.19	524.27	374.784	523.769	372.019	529.468	374.677	525.097	371.68	521.933	372.57	526.68	369.636	527.102	368.333	525.984	368.653	522.881	368.966	519.93	366.159	528.11	365.678	524.938	379.548	517.948	377.038	521.469	364.649	528.061	367.811	526.007	373.22	528.307	369.049	528.563	351.888	531.565	349.012	531.736	357.598	528.658	356.405	525.788	361.164	526.147	363.626	525.858
381.083	515.844	374.981	524.714	374.486	524.119	371.383	529.639	374.016	525.045	371.128	522.063	371.911	526.699	369.111	527.002	367.662	525.926	368.057	522.641	368.305	519.888	365.91	528.565	365.015	524.88	378.902	517.894	376.993	522.077	364.045	528.253	367.172	525.949	372.904	528.681	368.371	528.611	351.666	532.044	349.112	532.412	356.903	528.615	355.717	525.721	360.47	526.093	363.292	526.194
381.086	516.474	374.508	524.908	374.082	524.329	370.732	529.752	373.44	525.103	370.473	521.984	371.252	526.677	368.478	527.033	366.991	525.878	367.398	522.571	368.036	520.396	365.739	529.07	364.423	525.002	378.326	517.97	377.03	522.721	363.356	528.291	366.972	525.463	372.562	529.111	367.692	528.605	351.163	532.227	348.774	532.871	356.207	528.594	355.028	525.666	359.777	526.035	362.982	526.554
380.806	516.879	374.221	525.258	373.835	524.799	370.079	529.839	372.973	525.29	370.177	522.345	370.599	526.593	368.136	526.67	366.319	525.848	366.737	522.56	367.947	520.985	365.075	529.122	363.94	525.274	377.967	518.407	376.585	522.918	362.665	528.253	366.775	524.937	371.914	529.129	367.015	528.564	350.86	532.616	348.259	533.059	355.511	528.606	354.338	525.621	359.084	525.976	362.627	526.871
380.286	517.093	374.027	525.699	373.456	525.146	369.423	529.91	372.868	525.864	369.855	522.734	369.961	526.45	367.819	526.267	365.648	525.874	366.077	522.605	368.043	521.645	364.409	529.103	363.862	525.852	377.938	518.991	376.127	523.118	361.976	528.188	366.148	524.737	371.245	529.089	366.341	528.49	350.615	533.062	347.589	532.985	354.826	528.71	353.647	525.593	358.391	525.917	362.301	527.202
379.656	517.009	373.569	526.037	372.805	525.212	368.765	529.965	372.405	526.111	369.499	523.136	369.352	526.212	367.468	525.904	365.234	526.179	365.446	522.792	367.593	521.878	363.741	529.044	363.405	526.049	377.963	519.573	376.017	523.681	361.287	528.11	365.511	524.836	370.576	529.016	365.682	528.33	350.112	533.239	347.153	533.264	354.253	528.982	352.956	525.6	357.697	525.859	361.991	527.548
379.216	517.155	372.992	526.179	372.148	525.193	368.107	530.009	371.748	526.164	368.833	523.127	369.054	525.712	366.798	525.95	364.939	526.627	365.112	523.207	367.252	522.203	363.074	528.967	362.744	526.031	377.615	519.874	376.024	524.307	360.6	528.024	365.082	525.17	369.907	528.958	365.236	527.953	349.856	533.687	346.834	533.63	353.835	529.469	352.269	525.654	357.003	525.804	361.645	527.935
379.044	517.632	372.331	526.176	371.492	525.149	367.448	530.044	371.085	526.112	368.167	523.083	368.931	525.125	366.129	526.011	364.638	527.118	365.001	523.788	367.043	522.639	362.408	528.888	362.083	525.953	377.256	520.196	375.95	524.846	359.912	527.945	365.039	525.805	369.387	529.087	364.922	527.46	349.526	534.04	346.582	534.043	353.912	530.149	351.587	525.764	356.31	525.754	361.099	528.037
378.627	517.846	371.672	526.119	370.836	525.087	366.788	530.061	370.424	526.045	367.503	523.009	369.049	524.477	365.505	526.015	364.086	527.36	364.471	523.94	366.599	522.907	361.742	528.811	361.47	526.019	376.937	520.562	375.381	524.944	359.222	527.893	364.489	526.018	369.035	529.428	364.646	527.026	348.839	533.972	346.138	534.277	353.8	530.66	351.009	526.113	355.615	525.71	360.474	528.019
378.248	518.1	371.014	526.054	370.182	525.018	366.129	530.074	369.762	525.969	366.839	522.934	368.749	523.994	365.107	525.693	363.426	527.469	363.872	523.985	366.047	523.002	361.075	528.743	360.958	526.228	377.019	521.208	375.134	525.339	358.532	527.874	363.847	526.087	368.777	529.954	364.092	526.911	348.266	534.129	345.833	534.651	353.505	531.021	350.647	526.617	354.92	525.68	360.133	528.353
378.069	518.563	370.356	525.982	369.527	524.949	365.469	530.083	369.101	525.898	366.173	522.888	368.267	523.653	364.832	525.227	362.754	527.473	363.231	523.955	365.386	522.916	360.406	528.693	360.9	526.828	376.861	521.673	374.978	525.826	358.15	528.268	363.164	526.034	368.332	530.321	363.413	526.946	347.893	534.471	345.568	535.063	353.07	531.326	350.518	527.244	354.225	525.664	359.837	528.809
377.696	518.802	369.698	525.912	368.872	524.882	364.809	530.072	368.438	525.847	365.519	522.884	367.615	523.577	364.53	524.786	362.089	527.393	363.107	524.49	365.108	523.365	359.737	528.665	360.462	527.064	376.517	522	374.427	525.986	357.824	528.692	362.484	525.949	367.694	530.521	362.736	527.009	347.765	535.017	345.119	535.287	352.991	531.891	350.886	527.784	353.529	525.678	359.499	529.26
377.276	519.006	369.038	525.855	368.216	524.829	364.149	530.055	367.781	525.84	365.13	523.262	366.964	523.628	363.868	524.74	361.484	527.204	362.781	524.874	365.016	523.92	359.068	528.691	359.808	527.08	376.113	522.297	373.815	526.009	357.503	529.09	361.805	525.858	367.031	530.63	362.059	527.057	347.222	535.165	344.83	535.692	352.984	532.519	351.453	527.977	352.84	525.755	358.84	529.373
376.989	519.463	368.378	525.812	367.559	524.794	363.49	530.034	367.169	526.033	364.819	523.666	366.385	523.813	363.342	524.979	361.043	526.785	362.271	525.117	365.114	524.579	358.45	528.881	359.147	527.005	375.937	522.766	373.212	525.998	356.814	529.045	361.126	525.762	366.365	530.717	361.461	526.993	346.899	535.53	344.49	536.026	352.66	532.949	352.128	527.983	352.276	525.994	358.174	529.368
376.904	520.029	367.719	525.844	366.902	524.8	362.831	529.999	366.93	526.495	364.55	524.067	366.042	524.297	362.949	525.383	360.818	526.315	361.61	525.062	364.69	524.978	357.972	529.22	358.486	526.934	375.993	523.413	373.104	526.531	356.126	528.968	360.447	525.665	365.697	530.784	361.069	526.656	346.722	536.04	343.814	535.934	352.257	533.239	352.795	528.006	351.939	526.497	357.545	529.24
376.955	520.666	367.228	526.096	366.345	525.006	362.173	529.953	366.83	527.036	363.887	523.985	365.769	524.688	362.821	525.95	360.574	525.918	360.95	524.994	364.144	525.174	357.902	529.852	357.828	526.889	376.059	524.06	372.766	526.9	355.44	528.878	359.768	525.574	365.025	530.823	360.838	526.118	346.159	536.166	343.258	536.12	351.892	533.563	353.152	528.47	351.631	526.812	357.074	528.842
377.038	521.3	366.896	526.551	365.913	525.338	361.515	529.895	366.217	527.071	363.375	524.116	365.489	525.028	362.299	526.146	360.117	525.741	360.291	524.915	363.479	525.166	357.938	530.502	357.199	527.015	375.959	524.601	372.242	527.132	354.751	528.801	359.088	525.488	364.354	530.849	360.504	525.631	345.891	536.588	342.928	536.515	351.625	534.002	353.286	529.093	351.255	527.134	356.851	528.344
377.089	521.936	367.044	527.196	365.816	525.86	360.86	529.82	365.973	527.482	362.992	524.427	365.065	525.316	361.629	526.186	359.896	525.234	359.629	524.905	362.817	525.08	357.832	530.997	356.959	527.458	375.63	524.996	371.591	527.07	354.062	528.791	358.407	525.411	363.682	530.862	359.896	525.336	345.668	537.058	342.993	537.19	351.216	534.26	353.143	529.753	350.836	527.486	356.592	527.949
377.106	522.573	366.946	527.779	365.401	526.103	360.206	529.73	365.877	528.073	362.745	524.91	364.988	525.857	360.957	526.167	359.589	524.754	359.204	525.156	362.154	525.001	357.172	530.994	356.871	528.008	375.231	525.244	370.94	527.001	353.434	528.917	357.725	525.346	363.009	530.863	359.246	525.147	345.069	537.162	342.839	537.724	350.881	534.635	352.579	529.928	351.252	527.842	355.92	527.998
376.695	522.859	366.603	528.299	364.958	526.311	359.555	529.625	365.281	528.35	362.261	525.125	365.004	526.474	360.286	526.129	358.966	524.511	359.015	525.667	361.492	524.93	357.014	531.487	356.214	527.987	374.996	525.617	370.29	526.924	352.938	529.293	357.042	525.295	362.337	530.854	358.584	525.003	345.005	537.719	342.51	538.092	350.601	535.1	352.167	530.215	351.749	528.135	355.249	528.063
376.316	523.152	365.979	528.5	365.072	526.959	358.919	529.448	364.649	528.53	361.594	525.128	364.721	526.914	359.615	526.08	358.312	524.361	358.569	525.914	361.169	525.302	356.847	531.997	355.574	528.008	375.088	526.26	369.64	526.916	352.932	529.938	356.357	525.272	361.665	530.835	357.912	524.902	345.014	538.381	341.975	538.25	349.908	535.042	352.063	530.77	352.228	528.456	354.613	528.053
376.07	523.519	365.337	528.638	365.004	527.565	358.375	529.149	363.995	528.643	360.929	525.063	364.361	527.195	358.945	526.022	357.649	524.247	358.019	526.006	360.868	525.738	356.199	532.105	355.014	528.123	374.87	526.765	369.201	527.136	352.885	530.54	355.672	525.283	360.994	530.795	357.235	524.858	344.87	538.994	342.009	538.898	349.216	534.966	351.505	530.956	352.353	529.137	354.066	527.836
375.713	523.784	364.68	528.713	364.774	528.08	357.933	528.712	363.332	528.695	360.265	524.993	363.991	527.448	358.275	525.962	356.981	524.167	357.36	525.936	360.584	526.233	355.537	532.073	354.975	528.748	374.482	527.094	369.026	527.641	352.692	531.037	354.991	525.328	360.324	530.744	356.557	524.847	344.24	539.015	341.954	539.514	348.563	534.953	350.874	531.002	352.354	529.825	353.874	527.349
375.346	524.055	364.019	528.72	364.127	528.15	357.793	528.204	362.668	528.717	359.6	524.921	363.795	528.013	357.605	525.903	356.309	524.119	357.142	526.391	359.925	526.322	354.871	531.999	354.569	529.002	373.838	527.042	369.08	528.271	352.207	531.22	354.315	525.425	359.655	530.683	355.878	524.869	343.584	539.032	341.759	540.057	348.065	535.248	350.231	530.979	352.21	530.462	353.628	526.933
375.047	524.438	363.359	528.695	363.476	528.127	357.434	527.927	362.004	528.715	358.933	524.883	363.317	528.306	356.934	525.846	355.637	524.085	356.827	526.779	359.264	526.333	354.204	531.921	354.004	529.094	373.353	527.171	368.963	528.842	351.884	531.597	353.682	525.658	358.988	530.597	355.208	524.969	342.975	539.132	341.228	540.175	347.806	535.686	350.08	531.533	351.829	530.966	353.061	526.827
374.998	524.988	362.7	528.633	362.823	528.046	356.775	527.95	361.34	528.671	358.385	525.043	362.672	528.42	356.264	525.795	354.964	524.065	356.396	527.08	358.605	526.265	353.544	531.933	354.003	529.741	372.976	527.438	368.541	529.3	351.65	532.073	353.138	526.016	358.328	530.477	354.552	525.128	343.017	539.808	340.921	540.554	347.52	536.08	349.696	531.841	351.295	531.143	352.907	526.289
375.029	525.588	362.058	528.485	362.171	527.958	356.118	528.014	360.682	528.589	357.948	525.365	362.015	528.387	355.592	525.753	354.291	524.062	355.744	527.013	358.186	525.871	353.075	532.148	353.609	529.993	372.806	527.995	367.958	529.561	350.962	531.993	352.723	526.533	357.685	530.308	353.915	525.35	342.991	540.474	340.745	541.093	347.022	536.288	349.244	532.071	350.994	531.5	352.644	525.81
374.638	525.884	361.479	528.232	361.55	527.987	355.462	528.08	360.031	528.467	357.779	525.888	361.434	528.169	354.92	525.726	353.618	524.072	355.085	526.945	357.904	525.387	353.049	532.781	353.029	530.061	372.335	528.299	367.339	529.76	350.381	532.101	352.593	527.191	357.126	529.97	353.371	525.74	342.835	541.044	340.069	541.125	346.798	536.738	349.087	532.586	351.058	532.191	352.016	525.612
374.311	526.2	360.982	527.849	360.984	528.132	354.805	528.144	359.415	528.229	357.317	526.111	360.944	527.81	354.248	525.739	352.945	524.099	354.424	526.889	357.742	524.823	352.535	532.955	353.004	530.707	371.709	528.459	366.7	529.899	349.937	532.379	352.569	527.865	356.919	529.438	352.953	526.24	342.155	541.055	339.391	541.092	346.446	537.087	348.664	532.901	350.891	532.789	351.35	525.606
374.039	526.533	360.875	527.307	360.936	528.74	354.146	528.171	359.099	527.774	356.652	526.117	360.889	527.233	353.607	525.845	352.274	524.153	354.13	527.322	357.124	524.582	351.895	532.994	352.994	531.354	371.062	528.513	366.055	530.001	349.787	532.928	352.643	528.546	356.805	528.87	352.652	526.831	341.494	541.056	338.711	541.021	345.914	537.29	348.098	533.044	350.496	533.11	350.701	525.72
373.687	526.878	360.599	526.942	360.58	529.039	353.53	528.083	358.94	527.224	355.987	526.047	360.532	526.946	353.025	526.11	351.605	524.222	353.816	527.687	356.487	524.4	351.237	532.978	352.932	531.939	370.413	528.525	365.406	530.081	349.223	533.003	352.789	529.215	356.176	528.658	352.56	527.499	340.996	541.219	338.031	540.945	345.918	537.981	347.414	532.942	349.959	533.247	350.087	525.979
373.218	527.047	360.04	526.845	359.972	529.084	352.986	527.814	358.439	527.092	355.324	525.969	359.979	526.843	352.905	526.67	350.938	524.311	353.458	527.942	355.832	524.275	351.062	533.468	352.316	531.984	369.763	528.504	364.753	530.13	348.576	533.02	352.928	529.886	355.521	528.583	352.554	528.173	340.96	541.874	337.408	541.033	345.977	538.672	346.726	532.891	349.855	533.837	349.935	526.533
372.584	526.961	359.92	526.289	359.964	529.721	352.838	527.315	358.168	526.722	354.66	525.884	359.916	526.251	352.624	527.023	350.281	524.456	353.126	528.326	355.168	524.205	350.817	533.89	352.047	532.369	369.12	528.41	364.1	530.162	348.011	533.202	353.014	530.529	354.863	528.624	352.609	528.849	340.446	542.198	336.943	541.306	346.074	539.362	346.2	533.081	349.434	534.099	350.141	526.898
372.239	527.249	359.64	525.82	359.653	530.148	352.594	526.925	358.012	526.22	353.997	525.805	359.56	525.947	351.956	526.955	349.654	524.672	352.977	528.834	354.502	524.158	350.234	533.969	351.956	532.929	368.522	528.21	363.446	530.186	347.847	533.723	352.655	530.892	354.254	528.876	352.723	529.518	339.797	542.354	336.903	541.948	346.164	540.053	345.917	533.617	348.963	534.31	350.776	526.956
371.938	527.616	359.043	525.562	359.042	530.365	352.056	526.806	357.482	525.982	353.332	525.737	358.978	525.866	351.34	527.038	349.058	524.969	353.061	529.492	353.836	524.131	350.08	534.471	351.337	532.958	367.966	527.911	362.792	530.197	347.531	534.09	352.295	531.216	353.991	529.393	352.855	530.185	339.105	542.354	336.389	542.24	346.205	540.746	346.01	534.291	348.868	534.915	350.919	527.493
371.619	528.018	358.394	525.462	358.387	530.363	351.894	526.288	356.875	525.928	352.666	525.681	358.933	525.253	350.958	527.343	349.023	525.6	352.707	529.841	353.168	524.146	349.827	534.888	351.075	533.336	367.943	527.3	362.138	530.188	346.956	534.208	351.945	531.53	353.922	530.032	352.981	530.852	338.451	542.169	335.731	542.367	346.142	541.41	345.828	534.774	348.305	535.028	351.23	527.846
371.069	528.12	357.736	525.414	357.749	530.271	351.653	525.924	356.214	525.997	351.998	525.659	358.613	524.807	350.914	527.949	348.704	525.925	352.362	530.162	352.503	524.19	349.251	535.01	351.06	533.956	367.662	526.869	361.484	530.167	346.842	534.774	351.635	531.903	354.021	530.695	353.058	531.524	338.089	541.758	335.05	542.348	345.861	541.993	345.351	535.041	347.617	534.982	351.785	527.937
370.431	528.099	357.074	525.416	357.132	530.079	351.084	526.062	355.553	526.04	351.334	525.689	358.036	524.518	350.345	528.049	348.081	525.929	352.072	530.478	351.841	524.261	348.597	534.974	351.048	534.599	367.051	526.667	360.831	530.131	346.463	535.09	351.276	532.223	353.601	530.914	352.696	531.845	338.004	541.138	334.417	542.149	345.241	542.101	344.667	534.947	346.928	534.885	352.166	528.436
369.795	528.028	356.419	525.491	357.054	529.489	350.945	526.577	355.18	525.763	350.679	525.777	357.388	524.392	349.977	528.361	347.429	525.953	351.733	530.883	351.193	524.416	348.141	535.153	350.702	534.991	366.405	526.614	360.179	530.084	345.944	535.268	350.918	532.547	353.115	531.097	352.272	532.119	337.455	540.792	334.027	541.754	344.594	542.127	344.189	535.189	346.294	535.027	352.379	529.026
369.158	527.97	355.781	525.634	356.799	529.007	350.743	527.02	354.99	525.269	350.082	526.049	356.736	524.296	349.938	529.015	347.052	526.282	351.259	531.11	350.591	524.668	348.041	535.735	350.114	535.182	365.757	526.606	359.527	530.027	346.009	535.956	350.618	532.935	353.049	531.708	352.072	532.58	336.824	540.589	334.001	541.102	343.998	542.16	343.916	535.68	345.974	535.434	352.421	529.696
368.531	527.935	355.173	525.878	356.26	528.704	350.13	527.059	354.56	524.88	349.734	526.533	356.08	524.23	350.021	529.681	346.933	526.89	350.597	531.075	350.044	525.016	347.536	535.893	349.453	535.12	365.108	526.651	358.878	529.94	345.939	536.577	350.257	533.247	352.585	531.919	351.655	532.84	336.139	540.492	333.435	540.961	343.911	542.782	344.022	536.364	345.992	536.107	352.301	530.357
368.186	528.262	355.038	526.447	355.616	528.634	350.018	527.57	354	524.74	349.596	527.142	355.42	524.208	350.035	530.338	347.004	527.556	349.938	530.993	349.899	525.636	347.156	536.176	348.793	535.037	364.497	526.824	358.234	529.83	345.702	537.053	349.907	533.588	352.123	532.13	351.276	533.131	335.446	540.466	333.09	541.209	343.536	543.218	343.756	536.773	345.958	536.765	351.953	530.796
367.898	528.677	354.817	526.886	354.969	528.665	350.027	528.211	353.374	524.816	349.855	527.73	354.76	524.206	349.956	530.982	346.71	527.896	349.279	530.924	349.9	526.275	347.055	536.742	348.135	534.947	364.062	527.145	357.593	529.7	345.116	537.138	349.613	534.024	352.04	532.716	351.076	533.584	334.754	540.494	333.043	541.853	342.9	543.466	343.369	537.095	345.531	537.023	351.409	531.04
367.672	529.19	354.239	526.933	354.335	528.814	349.96	528.828	353.091	525.319	350.357	527.956	354.1	524.226	349.329	531.016	346.155	528.01	348.618	530.882	349.993	526.903	346.54	536.896	347.476	534.942	364.026	527.751	356.97	529.507	344.917	537.63	348.978	533.998	351.574	532.915	350.652	533.889	334.071	540.582	332.433	541.932	342.211	543.568	343.031	537.464	344.85	537.021	351.149	531.407
367.096	529.398	353.99	527.429	354.101	529.32	349.475	529.009	352.78	525.71	350.957	528.046	353.443	524.284	348.996	531.341	346.063	528.589	348.191	531.201	349.387	526.931	346.161	537.184	347.125	535.26	363.604	528.13	356.423	529.207	344.628	538.02	348.41	534.078	351.137	533.141	350.108	534.028	333.409	540.768	332.105	542.29	341.518	543.628	343.05	538.096	344.196	537.045	350.811	531.728
366.477	529.538	353.889	528.044	353.833	529.744	348.842	529.03	352.426	525.99	351.272	528.608	352.79	524.369	348.997	531.999	345.692	528.88	347.853	531.572	349.012	527.278	346.045	537.737	346.973	535.787	363.04	528.393	355.95	528.806	343.946	537.985	347.991	534.387	351.046	533.712	349.433	533.947	333.108	541.278	331.975	542.844	340.822	543.657	342.949	538.677	343.984	537.524	350.42	532.019
365.841	529.608	353.958	528.702	353.39	529.916	348.195	529.014	351.768	525.907	351.452	529.232	352.141	524.487	348.34	531.997	345.145	529.009	347.612	531.959	348.842	527.892	345.539	537.901	346.451	535.911	362.399	528.499	355.863	528.276	343.299	538.061	347.736	534.823	350.573	533.906	349.159	534.356	332.808	541.712	331.396	542.93	340.125	543.652	342.546	539.095	343.759	537.996	350.128	532.399
365.203	529.633	354.039	529.359	353.13	530.34	348.009	529.468	351.2	526.077	351.537	529.892	351.525	524.713	348.012	532.327	344.805	529.536	347.228	532.237	348.896	528.557	345.177	538.2	346.154	536.268	361.753	528.56	355.559	527.94	342.928	538.396	347.27	534.993	350.158	534.152	348.84	534.747	332.408	541.945	331.084	543.32	339.43	543.608	341.879	539.035	343.102	538.037	349.786	532.73
364.563	529.633	354.092	530.014	353	530.871	347.88	529.982	350.732	526.458	351.512	530.559	351.107	525.094	347.987	532.961	344.652	530.15	346.884	532.552	348.966	529.221	345.057	538.726	346	536.776	361.103	528.594	354.99	527.836	342.886	539.027	346.601	534.918	350.074	534.716	348.426	535.069	332.13	542.383	330.972	543.913	338.737	543.535	341.366	539.149	342.988	538.611	349.417	533.036
363.925	529.59	354.068	530.666	353.076	531.521	347.236	529.981	350.702	527.116	351.375	531.202	350.982	525.695	347.337	532.977	344.638	530.818	346.64	532.952	349.046	529.884	344.556	538.967	345.471	536.907	360.453	528.583	354.882	527.295	342.24	539.072	346.107	535.218	349.586	534.966	347.757	534.987	331.783	542.721	331.043	544.592	338.049	543.428	341.028	539.481	342.694	539.001	349.118	533.406
363.296	529.492	353.627	530.905	352.718	531.881	347.024	530.418	350.923	527.631	351.121	531.778	350.537	525.866	346.686	532.991	344.777	531.471	346.228	533.219	349.112	530.548	343.968	539.055	345.17	537.259	359.806	528.536	354.617	526.922	341.98	539.479	345.945	535.739	348.982	535.058	347.083	534.921	331.371	542.974	330.663	544.871	337.413	543.173	340.715	539.963	342.016	539.002	348.778	533.737
362.682	529.346	353.186	531.131	352.198	532.062	346.908	530.955	351.348	528.019	350.554	532.045	350.096	526.119	346.066	533.035	345.18	531.823	345.982	533.616	349.121	531.21	343.303	538.974	345.022	537.763	359.162	528.456	354.062	526.852	342.008	540.16	345.976	536.391	348.315	534.969	346.42	534.897	330.988	543.406	330.178	545.079	337.067	542.724	340.175	540.176	342.003	539.667	348.423	534.052
362.177	529.003	353.074	531.649	351.547	531.97	346.283	530.985	351.909	528.181	349.927	532.07	349.733	526.605	346.028	533.656	345.713	532.039	346.074	534.272	349.051	531.838	342.635	538.936	344.498	537.953	358.54	528.274	353.938	526.308	341.944	540.799	345.754	536.867	347.65	534.939	346.068	535.338	330.861	544.004	330.014	545.642	336.98	542.105	339.486	540.199	341.641	539.989	348.125	534.403
361.911	528.552	352.646	531.916	351.197	532.269	346.031	531.403	352.253	528.608	349.34	532.053	349.732	527.227	346.024	534.3	346.16	532.424	345.848	534.779	348.462	531.941	342.193	539.159	343.899	538	358.157	527.889	353.703	525.799	341.494	541.037	345.336	537.152	347.174	535.128	345.982	535.909	330.892	544.695	330.019	546.293	336.416	541.772	338.796	540.159	341.035	540.073	347.789	534.763
361.854	528.006	352.084	532.039	350.913	532.656	345.986	532.03	352.419	529.248	349.125	532.474	349.95	527.742	345.997	534.922	346.369	532.997	345.437	535.066	348.145	532.29	342.013	539.685	343.265	537.964	357.973	527.336	353.134	525.49	340.995	541.224	344.947	537.446	347.027	535.677	346.049	536.554	330.972	545.385	329.89	546.81	335.775	541.581	338.107	540.101	340.998	540.729	347.377	535.047
361.31	527.911	351.428	531.961	350.526	532.909	346.002	532.679	352.458	529.911	348.766	532.82	350.477	528.007	345.377	535.065	346.428	533.659	344.781	534.995	348.013	532.804	341.547	539.884	343.092	538.478	357.56	527.129	352.513	525.304	340.947	541.871	345.021	538.126	346.57	535.862	345.67	536.978	331.05	546.074	329.342	546.962	335.086	541.491	337.419	540.033	340.588	541.15	346.708	534.963
360.952	527.629	351.162	532.325	350.227	533.261	345.63	532.949	352.434	530.573	348.296	533.059	351.106	527.969	344.731	535.067	346.336	534.322	344.276	535.165	347.461	532.944	341.233	540.213	342.751	538.803	357.258	526.816	351.875	525.169	340.451	542.221	344.875	538.677	346.169	536.144	345.104	537.094	331.108	546.765	329.127	547.421	334.391	541.467	336.731	539.96	339.968	541.398	346.255	535.193
360.882	527.059	350.951	532.789	349.939	533.63	345.082	533.051	352.348	531.227	347.634	532.968	351.704	528.013	344.065	534.978	345.969	534.797	343.9	535.468	346.847	532.973	341.093	540.692	342.287	538.989	357.079	526.384	351.226	525.092	339.809	542.414	344.564	539.08	345.924	536.659	344.429	537.024	331.124	547.457	328.832	547.8	333.696	541.5	336.043	539.89	339.276	541.456	345.908	535.555
360.386	526.918	350.44	533.046	349.554	533.907	345.017	533.652	352.038	531.779	346.971	532.91	352.184	528.378	343.402	534.952	345.447	535.085	343.725	535.941	346.216	532.958	340.602	541.04	342.115	539.474	356.699	525.943	350.573	525.062	339.119	542.461	344.029	539.234	345.971	537.311	343.755	536.939	330.739	547.838	328.308	547.957	333.012	541.597	335.354	539.829	338.583	541.434	345.608	535.908
359.963	526.7	349.824	533.076	349.251	534.25	345.017	534.285	351.57	532.052	346.362	532.954	352.373	528.965	343.098	535.312	344.785	534.988	343.295	536.173	346.009	533.504	340.021	541.222	341.777	539.799	356.212	525.615	349.92	525.062	338.43	542.418	344.002	539.827	346.036	537.979	343.273	537.157	330.327	548.17	328.122	548.448	332.348	541.786	334.664	539.783	337.902	541.337	345.263	536.229
359.924	526.093	349.165	533.01	348.969	534.617	345.01	534.892	350.994	532.115	346.013	533.395	352.433	529.611	342.953	535.845	344.276	535.163	342.914	536.454	345.978	534.115	339.351	541.239	341.313	540.004	355.583	525.458	349.269	525.114	337.76	542.291	343.975	540.458	346.083	538.648	342.905	537.52	329.953	548.496	327.801	548.806	332.079	542.328	333.973	539.788	337.243	541.142	344.918	536.554
359.516	525.707	348.508	532.929	348.59	534.944	344.397	534.939	350.941	532.724	345.972	533.984	352.356	530.264	342.378	535.927	343.954	535.535	342.743	536.934	346.033	534.739	338.681	541.198	341.149	540.461	354.938	525.383	348.628	525.228	337.124	542.07	343.783	541.011	345.613	538.878	342.636	537.908	330.041	549.181	327.282	548.971	331.771	542.729	333.381	539.973	337.096	540.563	344.622	536.927
358.954	525.431	347.851	532.902	348.036	535.007	344.091	535.297	350.589	533.032	345.988	534.589	352.01	530.747	342.062	536.325	344.031	536.202	342.286	537.154	345.513	534.908	338.013	541.146	340.824	540.856	354.29	525.34	348.001	525.396	337.067	541.437	343.277	541.168	345.23	539.188	342.273	538.216	329.87	549.694	327.132	549.473	331.355	542.908	332.906	540.35	336.801	540.064	344.273	537.235
358.333	525.284	347.275	532.991	347.425	534.978	343.999	535.869	350.001	533.104	345.617	534.957	351.575	531.108	341.93	536.912	343.848	536.714	341.954	537.472	345.198	535.256	337.345	541.083	340.352	541.186	353.64	525.339	347.421	525.688	336.728	540.961	342.925	541.496	345.008	539.644	341.913	538.533	329.487	550.057	326.791	549.851	330.995	543.393	332.738	540.814	336.287	539.703	343.93	537.562
357.703	525.178	347.063	533.49	347.108	535.367	343.415	535.94	349.947	533.716	345.047	534.997	351.114	531.261	342.018	537.579	343.532	537.101	342.032	538.129	345.009	535.715	336.677	541.015	339.689	541.203	352.992	525.386	347.028	526.156	336.161	540.636	342.788	542.065	345.064	540.299	341.646	538.944	329.119	550.367	326.269	550.093	330.86	544	332.383	541.135	335.596	539.64	343.637	537.991
357.069	525.102	346.708	533.797	346.784	535.709	343.082	536.28	349.578	534.001	344.439	534.982	350.854	531.656	342.059	538.247	343.076	537.292	341.895	538.683	344.524	535.95	336.01	540.947	339.026	541.185	352.348	525.467	346.776	526.731	335.478	540.528	342.108	542.028	344.876	540.793	341.283	539.23	328.782	550.712	325.59	550.015	330.895	544.695	331.937	541.389	334.913	539.691	343.041	538.016
356.43	525.075	346.317	534.047	346.455	536.022	342.973	536.859	348.933	534.001	344.043	535.348	350.598	532.067	341.97	538.818	342.82	537.707	341.613	539.09	343.936	536.003	335.343	540.88	338.362	541.138	351.715	525.614	346.796	527.38	334.789	540.476	341.487	542.081	344.393	541.092	340.937	539.563	328.437	551.064	324.911	549.957	330.976	545.387	331.737	541.85	334.306	539.886	342.46	538.06
355.791	525.069	346.108	534.49	346.138	536.36	343.022	537.514	348.284	534.023	343.989	535.921	350.116	532.239	341.405	538.956	342.541	538.095	341.113	539.209	343.311	535.97	334.674	540.822	337.7	541.072	351.242	525.978	346.886	528.024	334.098	540.468	340.957	542.251	343.731	541.009	340.67	540.048	328.017	551.384	324.297	549.989	331.056	546.079	331.305	542.135	334.059	540.435	342.068	538.353
355.151	525.087	345.748	534.821	345.817	536.691	342.758	537.88	347.98	534.377	343.997	536.534	349.857	532.635	341.161	539.36	342.096	538.289	340.902	539.68	343.097	536.452	334.005	540.779	337.038	541.004	350.875	526.419	346.992	528.637	333.408	540.519	340.877	542.872	343.272	541.174	340.049	540.106	328.003	551.993	324.083	550.49	331.12	546.772	330.905	542.464	333.703	540.808	341.797	538.811
354.515	525.152	345.277	535.042	345.491	537.016	342.183	537.961	347.967	535.009	343.672	536.958	349.623	533.059	340.963	539.825	341.849	538.756	340.617	540.105	342.754	536.776	333.336	540.754	336.377	540.933	350.713	526.817	346.581	528.833	332.736	540.668	340.446	543.232	343.023	541.6	339.372	540.067	327.948	552.588	323.709	550.831	331.139	547.467	330.899	543.151	333.221	541.002	341.398	539.127
353.883	525.246	344.621	534.953	345.165	537.335	342.051	538.517	347.31	534.998	343.11	537.008	349.124	533.217	340.415	540.08	341.488	539.117	339.966	540.195	342.338	537.01	332.672	540.818	335.715	540.869	350.339	527.105	346.204	529.15	332.217	540.983	339.797	543.406	342.614	541.92	338.698	539.985	327.61	553.008	323.21	551.021	330.743	547.845	330.967	543.838	332.531	540.919	340.726	539.131
353.26	525.389	344.221	535.203	344.841	537.675	342.008	539.12	346.664	535.003	342.494	536.989	348.866	533.617	339.778	540.108	340.82	539.151	339.306	540.186	342.113	537.449	332.22	541.121	335.052	540.818	349.898	527.376	345.857	529.575	331.967	541.557	339.114	543.44	342.072	542.029	338.021	539.926	327.23	553.283	322.533	550.937	330.335	548.175	331.045	544.524	332.164	541.286	340.055	539.073
352.675	525.635	343.954	535.63	344.518	538.03	342.057	539.772	346.04	535.034	342.036	537.293	348.66	534.067	339.109	540.045	340.15	539.101	338.644	540.14	341.768	537.769	331.924	541.585	334.388	540.78	349.902	528.024	345.885	530.228	331.597	541.798	338.432	543.408	341.418	541.959	337.438	540.027	326.904	553.677	322.179	551.275	330.024	548.52	331.109	545.213	331.832	541.665	339.384	539.002
352.143	525.957	343.562	535.877	343.868	537.93	341.53	539.923	345.998	535.654	341.969	537.853	348.152	534.203	338.441	539.962	339.48	539.031	337.984	540.073	341.356	538.024	331.585	541.857	333.728	540.829	349.955	528.67	345.935	530.879	331.207	542.119	337.767	543.296	341.175	542.371	336.969	540.322	326.637	554.217	321.881	551.685	329.651	548.837	330.886	545.769	331.472	541.956	338.714	538.927
351.76	526.451	343.245	536.219	343.315	538.051	341.172	540.22	345.656	535.979	341.98	538.469	347.886	534.603	337.772	539.924	338.812	538.951	337.324	540.001	341.104	538.443	331.268	542.196	333.25	541.09	350.043	529.314	346.01	531.529	330.817	542.575	337.155	543.031	340.853	542.783	336.788	540.837	325.957	554.278	321.466	551.938	329.286	549.182	330.488	546.114	331.102	542.34	338.041	538.887
351.642	527.027	342.966	536.609	342.864	538.403	341.061	540.729	345.041	536.034	341.717	538.92	347.678	535.059	337.239	540.046	338.141	538.902	336.664	539.93	341.054	539.006	330.959	542.569	332.943	541.55	350.13	529.959	346.083	532.179	330.83	543.267	337.003	542.467	340.45	543.174	336.359	541.082	325.386	554.083	321.184	552.333	328.975	549.584	329.935	546.243	330.978	542.891	337.451	538.995
351.708	527.612	342.577	536.856	342.903	539.049	340.61	541.111	345.001	536.656	341.343	539.192	347.023	534.99	337.084	540.572	337.529	538.971	336.003	539.867	341.092	539.649	330.6	542.84	332.614	541.837	350.184	530.606	346.13	532.83	330.874	543.957	336.787	541.941	339.78	543.202	335.683	541.058	324.943	553.68	320.868	552.706	329.07	550.274	330.016	546.928	331.013	543.545	336.972	539.299
352.213	527.859	342.214	537.193	342.975	539.702	340.06	541.367	344.661	536.977	340.97	539.465	346.44	535.063	336.675	540.909	337.007	539.216	335.341	539.833	340.684	540.133	330.222	543.176	332.297	542.168	350.206	531.254	346.137	533.482	330.945	544.647	336.191	541.652	339.109	543.194	335.008	540.976	324.811	553.13	320.448	552.994	328.837	550.791	329.949	547.548	330.632	543.888	336.8	539.818
352.707	528.111	341.901	537.612	343.07	540.353	339.409	541.457	344.039	537.012	340.749	539.975	345.948	535.265	336.139	541.092	336.857	539.747	334.696	539.866	340.126	540.379	329.88	543.588	331.992	542.54	349.941	531.787	345.757	533.837	331.027	545.334	335.526	541.519	338.438	543.155	334.332	540.907	324.388	552.872	319.796	552.931	328.374	551.098	329.724	548.059	330.24	544.222	336.405	540.087
353.192	528.369	341.981	538.268	342.797	540.794	338.751	541.451	344.018	537.641	340.204	540.133	345.846	535.804	335.469	541.035	336.506	540.077	334.107	540.076	339.468	540.448	329.913	544.256	331.645	542.829	349.51	532.08	345.372	534.152	331.101	546.023	334.848	541.436	337.768	543.096	333.668	540.88	323.956	552.608	319.252	553.076	327.685	550.998	329.157	548.162	329.955	544.634	335.732	540.054
353.314	528.985	342.055	538.926	342.448	541.133	338.099	541.384	343.69	537.961	339.541	540.14	345.469	536.085	334.801	540.959	335.84	540.101	333.926	540.584	338.808	540.361	329.978	544.923	331.29	543.151	348.871	532.056	345.066	534.464	331.15	546.713	334.164	541.394	337.099	543.03	333.13	541.147	323.854	551.972	318.872	553.526	327.25	551.238	328.901	548.588	330.047	545.324	335.063	539.973
353.362	529.615	342.097	539.566	342.031	541.349	337.46	541.235	343.061	537.975	338.876	540.073	344.955	536.233	334.133	540.902	335.171	540.034	333.737	541.034	338.314	540.053	330.057	545.588	330.928	543.506	348.311	532.131	344.729	534.781	331.143	547.403	333.479	541.405	336.43	542.961	332.854	541.575	323.297	551.703	318.947	554.2	326.904	551.61	328.678	549.05	329.779	545.765	334.392	539.903
353.317	530.25	341.675	539.893	341.785	541.768	337.169	540.775	342.414	537.971	338.212	539.998	345.032	536.883	333.463	540.897	334.501	539.959	333.078	540.972	337.949	539.591	330.097	546.257	331.01	544.166	347.922	532.381	344.392	535.101	330.784	547.825	332.797	541.452	335.761	542.894	332.671	542.041	322.627	551.59	319.029	554.877	326.6	552.061	328.095	549.152	329.396	546.115	333.722	539.85
353.002	530.729	341.338	540.211	341.493	542.121	336.9	540.285	342.044	538.277	337.547	539.929	344.991	537.501	333.15	541.301	333.832	539.883	332.456	541.018	337.774	539.047	329.86	546.726	330.873	544.661	347.834	532.929	344.068	535.426	330.379	548.165	332.119	541.538	335.092	542.835	332.136	542.189	321.935	551.599	319.082	555.538	325.936	552.036	327.897	549.645	328.977	546.419	333.181	540.112
352.607	531.089	341.068	540.525	341.088	542.324	336.574	539.826	341.952	538.895	336.881	539.884	344.833	538.062	332.851	541.71	333.161	539.845	331.976	541.221	337.304	538.792	329.47	547.075	330.515	544.991	347.369	533.106	343.75	535.743	330.04	548.475	331.469	541.745	334.421	542.783	331.877	542.601	321.316	551.871	318.68	555.926	325.246	551.947	327.624	550.064	329.019	547.077	332.87	540.513
352.135	531.218	340.709	540.957	340.858	542.828	335.981	539.644	341.998	539.548	336.332	540.067	344.179	538.03	332.442	541.968	332.534	539.933	331.932	541.825	336.666	538.764	329.078	547.363	330.109	545.306	346.947	533.325	343.419	536.058	329.691	548.827	331.106	542.186	333.75	542.755	331.653	543.048	321.005	552.352	318.115	556.021	324.559	551.831	327.015	550.149	328.903	547.637	332.735	541.013
351.895	531.626	340.193	541.18	340.513	543.254	335.332	539.554	341.73	539.916	335.92	540.399	343.56	538.05	331.812	541.933	331.956	540.154	331.48	542.031	336.166	539.085	329.001	547.9	329.936	545.791	346.859	533.876	343.037	536.377	329.345	549.169	330.914	542.74	333.081	542.775	331.084	543.173	320.966	552.99	317.47	555.976	323.87	551.724	326.888	550.708	328.567	548.048	332.181	541.154
351.671	532.055	339.534	541.211	339.881	543.427	334.673	539.547	341.138	539.992	335.797	540.942	342.981	538.128	331.266	542.05	331.887	540.731	330.977	542.206	335.908	539.553	329.014	548.518	330.003	546.452	346.412	534.081	342.984	536.932	329.006	549.499	330.432	542.858	332.454	542.879	330.977	543.704	320.296	552.984	317.02	556.321	323.178	551.647	326.574	551.076	328.157	548.305	331.968	541.595
351.038	532.005	338.874	541.167	339.23	543.5	334.022	539.631	341.077	540.558	335.265	541.069	342.92	538.723	330.924	542.512	331.538	541.048	330.866	542.84	335.735	540.042	328.677	548.909	330.076	547.113	345.964	534.279	342.986	537.526	328.671	549.909	330.072	543.255	332.047	543.292	330.98	544.348	319.939	553.387	316.927	556.889	322.484	551.61	325.974	551.154	327.83	548.666	331.998	542.255
350.472	532.07	338.215	541.111	338.574	543.53	333.444	539.831	340.772	540.967	334.602	541.043	342.58	539.044	330.971	543.153	330.944	541.138	330.873	543.493	335.073	540.014	328.308	549.211	329.938	547.643	346.003	534.919	342.664	537.882	328.129	550.023	329.842	543.826	331.762	543.667	330.846	544.917	319.814	554.053	316.934	557.504	321.791	551.663	325.9	551.772	327.535	549.068	331.858	542.821
349.966	532.227	337.557	541.042	337.917	543.51	333.038	540.255	340.204	541.205	333.938	540.963	341.972	539.099	330.876	543.661	330.851	541.792	330.934	544.154	334.411	539.954	327.945	549.498	329.58	548.037	345.959	535.522	342.271	538.184	327.487	549.994	329.881	544.51	331.491	544.01	330.346	545.1	319.854	554.746	316.651	557.876	321.221	551.986	325.484	552.018	327.133	549.328	331.443	543.097
349.865	532.773	336.899	540.964	337.264	543.431	332.8	540.695	339.542	541.209	333.273	540.899	342	539.742	330.487	543.931	330.833	542.456	331.017	544.812	333.757	539.906	327.67	549.899	329.198	548.292	345.808	536.035	341.907	538.506	327.106	550.341	329.952	545.191	331.02	544.298	329.954	545.381	319.922	555.436	316.15	558.146	320.81	552.478	324.806	551.99	326.825	549.758	330.923	543.253
349.514	533.055	336.242	540.885	336.64	543.278	332.489	540.998	338.878	541.186	332.631	540.915	341.993	540.375	330.094	544.299	330.878	543.127	331.102	545.47	333.167	540.078	327.321	550.204	328.866	548.613	345.221	536.083	341.978	539.156	326.786	550.743	330.032	545.872	330.889	544.851	329.962	546.055	319.997	556.126	315.667	558.493	320.653	553.144	324.185	552.085	326.429	550.102	330.948	543.924
348.878	533.038	335.585	540.807	336.09	542.96	331.837	540.902	338.214	541.137	332.052	541.132	341.941	540.995	329.874	544.8	330.952	543.796	331.183	546.129	332.913	540.509	326.962	550.506	328.589	549.008	345.013	536.484	342.05	539.806	326.39	551.036	330.109	546.553	330.92	545.519	330.038	546.729	320.065	556.816	315.421	559.126	320.678	553.834	323.938	552.535	325.737	550.086	331.011	544.594
348.243	532.964	334.926	540.739	335.932	542.417	331.283	541.079	337.552	541.071	331.867	541.618	341.345	541.042	329.891	545.471	331.026	544.465	331.25	546.789	332.789	541.027	326.689	550.963	328.193	549.273	345.056	537.122	342.093	540.44	325.703	550.955	330.129	547.236	331.005	546.186	330.034	547.38	320.054	557.507	315.28	559.791	320.76	554.525	323.746	553.033	325.046	550.007	331.058	545.251
347.636	532.965	334.267	540.681	335.778	541.886	330.899	541.437	336.89	541.003	331.659	542.052	340.989	541.336	329.966	546.139	331.098	545.135	331.277	547.451	332.197	541.097	326.135	551.055	327.864	549.605	344.97	537.734	341.768	540.871	325.226	551.204	329.944	547.757	331.073	546.854	329.886	547.994	319.777	557.931	315.193	560.467	320.883	555.211	323.108	553.086	324.355	549.931	330.911	545.84
347.082	533.123	333.607	540.632	335.162	541.672	330.963	542.092	336.229	540.932	331.088	542.151	340.953	541.96	330.043	546.807	331.143	545.806	331.253	548.107	331.938	541.496	325.468	550.997	327.61	550.016	344.599	538.029	341.412	541.178	324.866	551.563	329.421	547.996	331.048	547.475	329.313	548.09	319.135	557.97	315.159	561.149	321.002	555.897	322.951	553.622	323.663	549.875	330.459	546.073
346.906	533.598	332.946	540.62	334.519	541.571	330.862	542.62	335.567	540.867	330.896	542.61	340.395	542.221	330.12	547.476	331.068	546.447	331.073	548.733	331.799	542.016	324.802	550.923	327.22	550.26	343.967	538.034	341.032	541.387	324.62	551.982	329.163	548.391	330.739	547.94	328.954	548.398	318.786	558.511	315.2	561.83	320.963	556.529	322.968	554.301	323.158	550.178	329.982	546.249
346.729	534.054	332.289	540.651	333.863	541.536	330.621	543.033	334.903	540.817	330.665	543.034	339.773	542.357	330.133	548.146	330.86	546.997	330.606	549.029	331.195	542.081	324.289	551.123	326.896	550.61	343.352	538.038	340.812	541.926	324.197	552.251	328.839	548.733	330.307	548.193	328.905	549.027	318.684	559.126	315.298	562.503	320.747	557.049	323.061	554.987	322.84	550.584	330.018	546.916
346.158	534.119	331.636	540.736	333.208	541.586	330.081	543.187	334.239	540.782	330.076	543.122	339.115	542.354	329.946	548.675	330.238	547.038	329.99	549.122	330.935	542.517	323.896	551.457	326.651	551.086	342.997	538.314	340.395	542.29	323.855	552.59	328.4	548.99	329.983	548.501	328.246	549.018	318.835	559.761	315.46	563.165	320.151	557.132	322.999	555.645	322.638	551.039	329.966	547.553
345.921	534.513	331.125	541.092	332.586	541.752	329.877	543.683	333.585	540.863	329.915	543.66	338.493	542.181	329.542	549.05	330.019	547.467	329.338	549.006	330.89	543.167	323.705	551.893	326.003	551.056	342.959	538.925	339.773	542.469	323.604	553.008	328.159	549.405	330.078	549.166	327.597	549.035	319.428	560.057	315.837	563.715	319.916	557.595	322.666	556.019	322.129	551.233	329.755	548.044
345.816	535.037	330.853	541.584	332.064	542.034	329.844	544.337	333.165	541.16	329.906	544.321	338.094	541.83	329.181	549.325	330.025	548.118	329.083	549.363	330.963	543.831	323.287	552.162	325.341	550.995	342.394	539.014	339.121	542.495	323.109	553.252	327.82	549.784	329.901	549.716	326.993	549.111	320.082	560.114	316.354	564.068	319.666	558.022	322.011	556.036	321.84	551.624	329.127	548.079
345.25	535.096	330.901	542.238	332.034	542.662	329.9	544.994	333.012	541.704	329.986	544.984	338.036	541.226	328.848	549.645	330.003	548.776	328.951	549.89	331.038	544.494	322.942	552.494	324.681	550.918	342.004	539.273	338.471	542.469	322.954	553.761	327.373	550.099	329.527	550.068	326.944	549.738	320.771	560.036	317.003	564.223	318.982	557.937	321.972	556.686	321.576	552.045	328.944	548.56
344.952	535.428	330.79	542.718	331.647	542.929	329.969	545.65	332.545	541.886	330.058	545.649	337.585	540.834	328.542	550.01	329.562	548.998	328.348	549.995	331.088	545.154	323.016	553.158	324.21	551.177	341.989	539.898	337.824	542.382	323.031	554.449	326.693	550.03	328.862	550.01	326.55	550.029	321.457	559.942	317.678	564.125	318.313	558.016	321.6	557.005	321.026	552.231	328.756	549.033
344.893	536.003	330.504	543.065	331.101	543.04	330.045	546.306	331.982	541.953	330.065	546.294	337.03	540.547	328.148	550.301	329.024	549.117	327.71	550.003	330.984	545.793	322.861	553.683	323.879	551.551	341.457	539.997	337.298	542.069	323.111	555.136	326.011	549.962	328.309	550.137	325.89	550.05	321.821	560.28	318.343	564.048	317.834	558.342	320.986	557.103	320.936	552.819	328.127	549.062
344.282	535.999	329.975	543.235	331.005	543.636	330.115	546.962	331.323	541.902	329.923	546.897	336.39	540.393	328.023	550.789	328.997	549.757	327.135	550.046	330.531	546.021	322.556	554.079	323.704	552.045	341.014	540.185	336.953	541.64	322.923	555.708	325.389	549.973	327.907	550.422	325.216	549.963	322.134	560.683	318.929	564.071	317.63	558.989	320.71	557.708	320.992	553.51	327.962	549.559
343.665	536.011	329.902	543.835	330.995	544.266	330.161	547.62	331.033	542.389	329.406	547.056	335.737	540.3	328.116	551.443	328.543	549.988	327.067	550.627	329.981	546.122	322.043	554.25	323.066	551.998	341.003	540.803	336.886	541.058	322.522	556.072	325.089	550.407	327.776	550.949	324.555	549.97	322.551	560.937	318.983	564.706	317.833	559.632	320.605	558.368	321.094	554.198	327.753	550.013
343.065	536.078	329.924	544.491	331	544.876	330.164	548.27	330.931	542.966	328.996	547.294	335.081	540.236	327.775	551.92	327.897	550.024	326.68	550.944	329.963	546.782	321.99	554.811	322.484	552.057	340.538	541.092	336.33	540.995	321.838	555.993	324.75	550.785	327.33	551.156	323.999	550.122	322.869	561.347	319.414	564.953	318.291	559.945	320.636	559.048	321.15	554.89	327.128	550.055
342.946	536.592	330.005	545.148	330.407	544.922	329.931	548.847	331.036	543.623	329.023	547.948	334.422	540.206	327.251	552.11	327.233	550.003	326.098	551.076	330.012	547.443	321.979	555.43	321.998	552.274	339.922	541.235	335.699	540.993	321.265	556.138	324.317	551.035	326.944	551.441	323.986	550.77	322.994	561.891	319.927	565.113	318.898	560.032	320.844	559.692	321.051	555.527	326.975	550.571
342.758	537.031	330.073	545.806	330.063	545.268	329.498	549.113	330.61	543.835	328.986	548.59	333.763	540.22	326.583	552.069	327.041	550.455	325.44	550.991	330.074	548.101	321.775	555.937	321.823	552.784	339.272	541.225	335.105	540.917	320.949	556.517	323.638	550.954	326.804	552.007	323.532	550.989	322.893	562.577	319.972	565.739	318.935	560.667	321.37	559.914	320.771	556.078	326.73	551.023
342.149	537.051	330.04	546.428	329.929	545.861	328.97	549.21	330.215	544.138	328.748	549.028	333.106	540.266	325.917	551.973	326.879	550.972	324.782	550.948	330.007	548.737	321.308	556.15	321.441	553.058	338.622	541.188	334.951	540.414	321.012	557.201	323.225	551.237	326.214	552.088	322.87	551.006	323.345	562.927	319.959	566.403	318.946	561.332	321.826	560.154	320.087	556.05	326.087	551.134
341.991	537.508	329.825	546.983	330.014	546.514	328.884	549.782	329.892	544.586	328.109	549.036	332.455	540.361	325.369	552.093	326.254	551.132	324.188	550.997	329.574	548.983	320.964	556.457	320.779	553.023	337.974	541.136	334.771	539.897	320.862	557.792	322.89	551.624	325.545	552.054	322.207	551.016	323.928	563.026	320.108	566.923	319.087	561.889	321.92	560.714	319.449	556.093	325.42	551.099
342.004	538.136	329.317	547.14	330.056	547.166	328.522	550.073	329.92	545.237	327.98	549.561	331.832	540.559	324.932	552.385	325.593	551.145	324.076	551.555	329.044	549.118	321.028	557.121	320.119	552.946	337.326	541.07	334.175	539.665	320.441	558.042	322.557	552.009	324.879	551.966	322.018	551.49	324.575	562.985	320.745	567.023	319.707	562.034	321.906	561.383	318.929	556.266	324.749	551.031
341.964	538.737	328.963	547.412	330.057	547.817	327.975	550.173	329.984	545.899	327.76	549.999	331.286	540.862	324.744	552.847	324.922	551.1	323.711	551.871	329	549.74	320.901	557.716	319.511	552.997	336.679	541.003	333.538	539.604	319.758	557.96	321.926	551.985	324.213	551.876	321.83	551.984	324.936	563.386	321.409	566.998	320.381	562.008	322.135	561.891	318.849	556.85	324.08	550.95
341.594	539.009	329.033	548.069	329.498	547.93	327.902	550.752	330.066	546.559	327.13	550.031	330.92	541.367	324.387	553.146	324.252	551.028	323.171	552.009	328.571	549.984	320.569	558.071	318.969	553.213	336.032	540.935	332.897	539.648	319.11	558.085	321.37	552.076	323.545	551.807	321.189	552.083	324.976	563.978	321.882	567.168	320.862	562.173	322.712	562.159	318.352	557.061	323.408	550.887
341.009	539.066	328.93	548.648	329.153	548.24	327.559	551.059	330.094	547.221	326.989	550.556	330.889	541.983	323.954	553.38	323.583	550.954	322.512	551.95	327.939	550.021	319.906	557.976	318.838	553.721	335.384	540.872	332.3	539.866	318.722	558.52	320.996	552.439	322.874	551.771	320.521	552.043	324.982	564.607	321.982	567.762	320.974	562.761	323.395	562.084	317.818	557.301	322.749	550.895
340.98	539.662	328.657	549.061	329.045	548.768	326.992	551.141	329.912	547.714	326.746	550.977	330.879	542.551	323.767	553.879	322.913	550.886	322.145	552.245	327.276	549.982	319.263	558.048	318.533	554.072	334.736	540.816	332.064	540.347	318.583	559.153	320.699	552.812	322.273	551.993	319.846	551.967	325.374	565.057	321.953	568.427	321.509	562.903	324.081	561.999	317.564	557.941	322.108	551.004
340.687	540.052	328.094	549.141	328.522	548.903	326.924	551.732	329.463	547.988	326.105	550.995	330.607	542.865	323.275	553.996	322.242	550.834	321.948	552.741	327.047	550.393	318.768	558.331	317.968	554.192	334.087	540.767	331.93	540.875	318.851	559.773	320.37	553.152	321.925	552.411	319.17	551.891	326.003	565.101	322.171	568.911	321.879	563.238	324.721	561.966	317.437	558.62	322.014	551.586
340.089	540.203	327.912	549.618	328.172	549.201	326.566	552.064	329.14	548.349	325.453	551.003	330.208	543.179	322.63	553.945	321.581	550.895	321.475	552.868	326.929	550.942	318.541	558.946	317.987	554.816	333.437	540.757	331.36	540.935	319.407	560.038	320.003	553.46	321.921	553.065	318.499	551.919	326.692	565.029	322.753	569.133	322.028	563.821	324.889	562.494	317.363	559.31	321.713	551.956
339.454	540.206	327.683	550.052	328.069	549.732	325.926	552.142	328.994	548.842	325.019	551.229	329.86	543.567	322.096	554.179	321.112	551.149	321.029	553.187	326.301	551.07	318.745	559.54	317.966	555.433	332.796	540.81	331.043	541.311	320.08	560.107	319.698	553.882	321.91	553.675	318.071	552.192	327.379	564.932	323.426	569.059	321.948	564.512	325.266	562.861	317.333	560.005	321.087	552.004
338.815	540.179	327.099	550.13	327.569	549.969	325.27	552.076	329.073	549.502	325.008	551.87	329.867	544.225	321.951	554.699	321.029	551.741	320.624	553.657	325.649	551.063	319.149	559.977	317.833	555.993	332.165	540.935	330.904	541.89	320.767	560.021	319.18	554.017	321.632	554.035	318.03	552.83	327.806	565.241	324.105	568.982	322.278	564.866	325.797	563.066	317.364	560.699	321.026	552.605
338.178	540.126	326.921	550.615	326.987	550.064	324.615	552	328.704	549.845	324.459	551.969	329.92	544.882	321.966	555.343	320.54	551.93	320.48	554.304	324.986	550.988	319.777	560.153	317.293	556.114	332.043	541.487	330.982	542.54	321.452	559.963	318.529	553.977	321.016	554.082	317.464	552.94	328.148	565.631	324.766	568.936	322.775	565.083	326.484	562.985	317.438	561.389	320.71	552.943
337.541	540.063	326.702	551.064	326.334	549.986	323.96	551.913	328.351	550.166	324.034	552.199	329.993	545.538	321.812	555.881	319.938	551.983	320.385	554.958	324.322	550.911	320.44	560.134	316.926	556.405	331.775	541.855	331.038	543.19	321.893	560.179	318.108	554.294	321.02	554.715	317.077	553.244	328.435	566.053	324.901	569.497	322.898	565.61	327.171	562.935	317.564	562.069	320.084	552.961
336.905	539.995	326.051	551.093	325.679	549.944	323.305	551.837	328.067	550.492	324.009	552.847	330.07	546.194	321.375	556.126	319.269	551.926	320.332	555.619	323.667	550.92	321.106	560.067	316.842	556.974	331.239	541.907	331.058	543.824	321.953	560.819	317.802	554.673	321.004	555.361	316.976	553.854	329.123	565.969	325.258	569.849	323.335	565.957	327.726	563.058	317.831	562.699	319.426	552.954
336.268	539.925	325.396	551.037	325.206	550.111	322.648	551.784	327.719	550.883	324.009	553.495	330.117	546.851	320.941	556.352	319.091	552.432	320.337	556.282	323.117	551.068	321.769	559.966	316.26	557.075	330.96	542.404	330.486	543.899	322.54	560.929	317.52	555.056	320.931	555.989	317.02	554.526	329.669	566.119	325.799	570.017	323.925	566.142	327.975	563.554	318.359	562.943	319.032	553.268
335.632	539.864	324.74	550.953	325.053	550.634	321.99	551.761	327.236	551.09	323.79	553.928	330.09	547.474	321.022	557.019	318.813	552.832	320.377	556.943	323.036	551.66	322.433	559.943	315.761	557.348	330.808	542.998	330.1	544.212	322.892	561.272	317.077	555.314	320.298	555.994	316.741	554.898	330.083	566.446	326.477	569.955	324.62	566.102	328.374	563.835	318.878	563.126	318.9	553.891
334.994	539.81	324.084	550.863	324.622	550.893	321.36	551.913	326.574	551.031	323.179	553.981	329.751	547.909	320.936	557.623	318.269	552.942	320.452	557.602	322.622	551.904	322.869	560.171	315.437	557.916	330.837	543.647	329.897	544.763	323.009	561.846	316.786	555.67	319.648	555.997	316.153	554.987	330.312	566.863	326.842	570.271	325.312	566.025	328.722	564.159	318.947	563.738	319.011	554.556
334.355	539.786	323.425	550.804	324.083	551.014	320.971	552.274	325.914	550.961	322.529	553.97	329.346	548.187	320.667	558.051	318.058	553.447	320.624	558.24	322.141	552.078	322.968	560.756	315.257	558.552	330.898	544.295	329.955	545.411	323.603	561.944	316.455	556.017	318.995	556.015	316.061	555.578	330.731	567.165	327.088	570.728	326.004	565.945	328.961	564.599	319.455	563.931	319.058	555.219
333.73	539.845	322.778	550.811	323.43	550.95	320.915	552.913	325.381	551.067	322.048	554.176	328.976	548.44	320.005	557.968	317.985	554.044	320.965	558.726	322.05	552.651	323.482	560.907	315.123	559.202	330.968	544.942	330.026	546.061	323.885	562.339	315.869	556.241	318.951	556.67	315.699	555.885	331.081	567.536	327.567	570.894	326.697	565.87	329.39	564.889	319.887	564.2	319.016	555.848
333.118	539.977	322.172	551.009	323.156	551.331	320.967	553.547	325.033	551.427	321.865	554.77	329.073	549.092	319.342	557.874	318.055	554.713	321.44	559.082	321.633	552.881	323.84	561.206	315.036	559.86	331.045	545.588	330.105	546.711	324.057	562.853	315.539	556.791	318.949	557.324	315.138	556.005	331.028	568.226	327.898	571.304	327.389	565.881	329.954	564.981	319.975	564.798	318.434	556.011
333.036	540.538	321.958	551.512	322.895	551.748	320.764	553.948	324.737	551.849	321.908	555.425	328.941	549.649	318.691	557.852	317.555	554.884	321.801	559.311	321.141	553.051	323.932	561.763	315.01	560.524	331.107	546.236	330.095	547.359	324.637	563.049	315.31	557.431	318.965	557.957	314.708	556.491	330.952	568.915	328.078	571.853	327.815	566.19	330.614	564.936	320.489	565.037	317.803	556.031
332.775	540.909	321.924	552.143	322.438	551.986	320.138	553.978	324.295	552.09	321.979	556.088	328.628	550.09	318.073	558.051	317.17	555.192	322.12	559.653	320.957	553.624	324.464	561.987	315.019	561.187	331.148	546.883	329.878	547.819	325.295	563.044	315.159	558.098	318.336	558	314.423	557.078	331.012	569.532	327.991	572.531	328.075	566.676	330.966	565.387	320.841	564.855	317.19	556.009
332.211	540.968	321.985	552.794	321.83	551.977	319.499	553.986	323.632	552.058	322.042	556.753	327.974	550.036	317.642	558.517	316.973	555.711	322.411	560.078	320.96	554.259	325.072	562.061	315.072	561.849	331.113	547.53	329.35	547.979	325.982	562.961	315.069	558.776	317.89	558.324	314.239	557.731	331.297	570.034	327.934	573.21	328.508	566.898	331.038	565.984	320.997	564.271	317.072	556.57
332.067	541.455	321.556	552.993	321.285	552.032	319.053	554.203	322.972	551.98	321.542	556.908	327.424	550.119	317.321	559.09	317.028	556.373	323.068	559.987	321.033	554.921	325.738	561.977	315.215	562.496	330.756	547.858	329.14	548.407	326.669	562.872	315.008	559.458	317.624	558.888	314.124	558.4	331.759	570.22	328.069	573.742	328.806	567.289	331.033	566.601	321.512	564.1	316.69	556.856
331.868	541.883	321.024	553.107	321.067	552.508	318.963	554.804	322.31	551.914	321.042	557.152	326.971	550.325	317.131	559.732	316.815	556.806	323.61	560.091	321.057	555.582	326.402	561.943	315.435	563.112	330.261	548.046	328.873	548.777	327.356	562.884	314.977	560.142	317.772	559.519	314.047	559.075	332.09	570.581	328.568	573.985	329.103	567.693	331.426	566.913	321.818	563.719	316.197	557.027
331.301	541.934	321.007	553.742	320.702	552.801	319	555.449	321.647	551.873	320.662	557.647	326.817	550.866	317.027	560.394	316.301	556.984	324.042	560.375	320.681	555.871	326.823	562.176	315.756	563.685	330.091	548.515	328.381	548.939	327.854	563.13	314.997	560.826	318.173	559.921	313.998	559.752	332.311	571.099	328.814	574.38	329.548	567.941	331.786	567.259	322.047	563.254	316.062	557.581
331.057	542.356	320.575	553.963	320.323	553.069	318.844	555.907	321.193	552.179	320.563	558.291	326.383	551.099	316.969	561.062	316.099	557.461	324.258	560.799	320.206	556.076	326.955	562.72	316.283	564.05	330.046	549.084	328.156	549.358	328.067	563.702	315.052	561.508	318.77	560.124	313.988	560.432	333	571.092	329.122	574.766	329.836	568.352	332.007	567.712	322.561	563.043	315.675	557.845
330.968	542.938	319.939	553.979	320.095	553.494	318.239	555.958	320.851	552.553	320.584	558.945	325.726	551.086	316.965	561.733	315.763	557.766	324.602	561.121	320.021	556.59	327.457	562.924	316.876	564.268	330.076	549.714	327.908	549.757	327.966	564.378	315.143	562.186	319.436	560.036	314.025	561.11	333.688	571.035	329.571	575.108	330.165	568.714	331.912	568.396	323.202	563.04	315.172	558.016
331.017	543.57	319.296	553.993	319.734	553.8	318.082	556.452	320.646	552.969	320.734	559.587	325.07	551.007	317.019	562.402	315.297	557.913	325.067	561.347	320.012	557.21	328.043	562.996	317.536	564.297	329.581	549.974	327.428	549.934	328.181	564.859	315.33	562.844	320.101	559.962	314.097	561.786	334.377	570.949	330.24	575.079	330.6	568.957	332.231	568.848	323.768	562.939	314.753	558.492
330.718	543.88	319.03	554.393	319.274	553.995	317.868	556.891	320.249	553.223	321.232	559.924	324.414	550.935	317.115	563.065	314.832	558.354	324.967	562.003	319.957	557.773	328.709	562.936	318.191	564.2	329.012	550.058	327.188	550.323	328.724	565.124	315.635	563.44	320.72	559.96	314.221	562.453	335.067	570.879	330.919	575.01	330.913	569.393	332.742	569.059	324.044	562.42	314.507	559.088
330.181	543.972	318.982	555.008	318.624	553.911	317.268	556.954	319.904	553.548	321.818	560.061	323.759	550.871	317.27	563.718	314.501	558.9	325.044	562.582	319.441	557.948	328.898	563.442	318.845	564.08	328.369	549.966	326.963	550.751	329.411	565.038	316.052	563.948	320.958	560.471	314.439	563.094	335.673	571.042	331.597	574.92	331.007	569.967	333.426	568.969	324.003	561.756	314.354	559.744
329.99	544.503	319.03	555.663	318.167	554.171	317.073	557.426	319.68	554.017	322.476	559.953	323.215	551.094	317.541	564.326	314.288	559.537	325.3	563.083	318.826	557.96	329.226	563.792	319.497	563.948	328.166	550.388	326.497	551.054	330.098	564.966	316.675	564.184	320.988	561.077	314.767	563.658	336.107	571.375	332.278	574.892	330.964	570.618	333.835	569.28	324.147	561.248	314.26	560.411
329.915	545.083	318.662	555.953	317.868	554.642	316.863	557.881	319.07	553.996	322.855	560.292	322.897	551.48	317.934	564.816	314.161	560.199	325.954	563.008	318.207	558.004	329.701	563.978	319.82	564.3	327.874	550.776	325.902	551.129	330.702	565.004	317.334	564.198	320.968	561.692	315.274	564.078	336.206	571.914	332.759	575.134	331.417	570.906	334.171	569.634	324.62	560.989	314.198	561.083
329.977	545.719	318.043	556.015	317.93	555.295	316.293	557.964	318.483	554.04	323.024	560.791	322.806	552.03	318.504	565.112	314.06	560.864	326.54	563.064	317.725	558.416	329.873	564.463	320.136	564.669	327.438	551.092	325.25	551.092	330.932	565.505	318.009	564.105	321.451	561.983	315.919	564.177	336.734	572.104	333.083	575.569	331.761	571.262	334.459	570.007	324.851	560.569	314.157	561.756
330.053	546.355	317.396	555.976	318.005	555.948	316.003	558.377	318.013	554.292	322.937	561.453	322.16	551.965	319.154	565.068	313.98	561.532	327.05	563.266	317.453	558.988	330.208	564.817	320.508	564.962	326.814	551.084	324.601	551.013	331.316	565.81	318.679	563.992	322.051	562.024	316.586	564.148	337.111	572.467	333.415	575.835	332.074	571.631	334.901	570.298	325.167	560.114	314.149	562.43
330.101	546.99	317.063	556.315	318.042	556.569	315.987	558.808	317.796	554.723	323.271	561.826	321.545	552	319.672	565.152	313.927	562.203	326.967	563.909	317.292	559.631	330.701	565.042	320.792	565.32	326.166	551.025	323.951	550.938	331.828	565.956	318.907	564.417	322.65	562.013	317.249	564	337.177	573.152	333.814	576.173	332.476	571.927	335.017	570.831	325.592	559.684	314.162	563.104
330.091	547.627	316.951	556.903	317.651	556.894	316.562	558.941	317.495	555.08	323.621	562.154	320.975	552.157	319.963	565.509	313.891	562.875	327.008	564.523	317.236	560.295	331.366	564.957	321.102	565.691	325.521	550.943	323.3	550.874	332.513	565.883	319.151	564.854	322.896	562.452	317.774	564.171	337.127	573.844	334.175	576.606	332.811	572.301	334.994	571.475	326.279	559.678	314.192	563.778
329.68	547.883	317.013	557.558	317.31	557.211	316.826	559.328	316.996	555.273	323.939	562.456	320.987	552.781	319.928	566.144	313.868	563.548	327.202	565.092	317.256	560.959	331.791	565.18	321.475	566.066	324.873	550.91	322.649	550.879	332.943	566.275	319.726	564.956	323.252	562.796	318.017	564.581	337.059	574.534	334.169	577.289	333.148	572.654	335.303	571.913	326.784	560.009	314.247	564.45
329.231	548.096	316.711	557.903	317.004	557.525	317.041	559.766	316.995	555.872	324.265	562.862	320.972	553.408	320.031	566.752	313.874	564.221	327.847	565.102	317.334	561.618	332.016	565.662	322.1	566.052	324.33	551.016	322.221	551.148	333.163	566.837	319.902	565.456	323.709	563.023	317.923	565.253	336.978	575.223	334.121	577.971	333.522	572.933	335.703	572.209	327.083	560.551	314.34	565.117
329.092	548.573	316.146	558.014	316.673	557.91	317.535	560.016	316.963	556.476	324.737	563.074	320.889	554.012	320.375	567.281	313.901	564.894	328.506	565.053	317.512	562.259	332.449	565.852	322.761	565.981	324.059	551.453	321.954	551.605	333.14	567.526	320.189	565.849	324.375	562.94	318.132	565.8	336.901	575.913	334.052	578.651	334.02	573.279	336.086	572.504	327	561.24	314.472	565.775
328.723	548.833	315.494	557.964	316.171	558.035	318.14	560.039	316.756	556.986	325.401	563.014	320.277	553.998	320.999	567.473	313.947	565.565	329.163	564.957	317.905	562.75	332.811	566.189	323.422	565.91	323.726	551.798	321.586	551.861	333.039	568.212	320.759	565.963	324.798	563.213	318.576	566.048	336.848	576.605	333.971	579.33	334.331	573.793	336.331	572.942	327.197	561.735	314.67	566.416
328.256	549.004	314.988	558.212	315.521	557.936	318.795	559.965	316.295	557.179	326.065	562.944	319.645	553.996	321.65	567.527	314.022	566.234	329.724	565.094	318.42	563.081	333.093	566.658	323.8	566.24	323.311	552.028	321.285	552.186	332.956	568.899	320.878	566.499	325.024	563.69	319.245	566.007	336.861	577.283	333.901	580.01	334.422	574.477	336.762	573.212	327.533	562.105	315.106	566.834
328.107	549.488	314.619	558.698	314.874	557.816	319.452	559.915	315.92	557.461	326.618	563.054	319.043	554.08	322.31	567.437	314.131	566.897	330.07	565.431	319.075	563.06	333.018	567.324	324.125	566.625	322.666	551.942	321.046	552.575	332.929	569.561	321.198	566.897	324.905	564.351	319.797	566.154	337.074	577.908	333.853	580.691	334.345	575.167	337.006	573.618	327.99	562.34	315.553	567.158
327.788	549.804	314.678	559.344	314.223	557.725	319.821	560.224	315.763	557.983	327.028	563.395	318.951	554.665	322.805	567.036	314.275	567.552	330.155	566.003	319.626	563.146	332.956	567.991	324.435	567.001	322.249	552.181	320.658	552.914	333.352	569.912	321.781	567.106	325.168	564.84	320.103	566.536	337.604	578.083	333.85	581.373	334.036	575.705	336.888	574.299	328.232	562.779	315.926	567.394
327.312	549.967	314.999	559.8	313.569	557.663	320.069	560.675	315.177	557.963	327.275	563.789	318.933	555.306	323.057	566.503	314.501	568.183	330.776	565.991	320.052	563.363	332.943	568.628	325.047	566.983	321.94	552.567	320.148	553.064	333.712	570.241	322.461	567.025	325.638	565.159	320.263	567.048	338.038	578.325	334.19	581.823	333.579	576.101	337.151	574.846	328.586	563.121	316.232	567.783
327.129	550.419	315.544	560.082	312.919	557.735	320.484	560.872	314.521	557.87	327.588	564.123	318.942	555.947	323.045	565.837	314.875	568.711	331.407	566.011	320.194	563.887	333.396	568.904	325.603	567.055	321.609	552.87	319.498	552.992	334.041	570.573	323.141	566.939	326.309	565.137	320.938	566.976	338.086	578.97	334.585	582.166	333.103	576.28	337.635	575.106	329.053	563.362	316.552	568.133
326.843	550.771	316.197	559.98	312.312	557.925	320.814	561.225	313.861	557.802	328	564.379	318.391	556.036	323.121	565.262	315.36	569.098	332.007	566.119	320.623	564.122	333.74	569.241	325.976	567.399	321.291	553.196	318.848	552.935	334.389	570.968	323.82	566.861	326.976	565.064	321.552	567.044	338.703	579.008	334.98	582.404	332.823	576.678	338.322	575.077	328.95	564.05	316.914	568.378
326.382	550.95	316.693	560.125	311.752	558.248	321.052	561.692	313.259	557.997	328.25	564.789	317.871	556.24	323.46	564.933	316.014	569.113	332.093	566.674	321.057	564.352	334.019	569.609	326.262	567.767	320.979	553.534	318.328	553.063	334.989	570.996	324.497	566.891	327.642	564.98	322.033	567.273	339.37	579.016	335.258	582.833	332.49	577.059	339.006	574.975	329.069	564.643	317.192	568.856
326.168	551.359	317.04	560.498	311.407	558.796	320.974	562.346	312.767	558.356	328.574	565.126	317.559	556.805	324.055	564.844	316.589	569.148	332.374	567.039	321.177	564.904	334.417	569.871	326.568	568.107	320.653	553.849	318.002	553.465	335.589	571.037	324.887	567.251	328.31	564.914	321.951	567.938	340.005	579.084	335.72	583.018	331.894	577.234	339.601	575.069	329.404	565.075	317.625	569.189
325.923	551.753	316.945	561.152	311.151	559.39	321.201	562.758	312.46	558.934	328.999	565.365	317.381	557.433	323.946	564.181	316.979	569.335	332.976	567.097	321.611	565.127	334.972	569.916	326.937	568.39	320.328	554.167	317.692	553.777	335.991	571.399	325.055	567.821	328.755	565.181	322.013	568.574	340.056	579.728	336.395	582.922	331.733	577.851	340.074	575.338	330.093	565.013	318.289	569.28
325.46	551.98	317.079	561.686	310.998	560.029	321.622	563.019	312.319	559.576	329.244	565.785	317.251	558.079	323.959	563.53	316.857	569.995	333.021	567.701	322.044	565.356	335.608	569.878	327.233	568.789	320.005	554.487	317.364	554.089	336.29	571.747	324.951	568.496	329.103	565.559	322.253	569.083	340.446	580.029	336.996	583.158	331.82	578.476	340.209	575.858	330.67	565.133	318.963	569.275
324.876	551.996	317.439	562.1	310.952	560.683	321.924	563.416	312.248	560.233	329.573	566.124	317.167	558.733	324.099	562.904	316.974	570.603	332.978	568.355	322.126	565.975	336.06	570.308	327.647	569.035	319.689	554.822	316.998	554.427	336.681	572.069	325.282	568.903	329.376	565.97	322.918	569.149	341.053	580.138	337.346	583.621	332.147	579.029	340.657	576.112	331.089	565.426	319.637	569.248
324.304	552	318.091	562.012	310.956	561.338	322.004	563.959	312.256	560.897	330.008	566.359	317.121	559.391	324.712	562.653	317.286	571.089	332.882	569.012	322.632	566.216	336.273	570.884	328.306	568.954	319.367	555.146	317.004	555.018	337.226	572.358	325.829	569.106	329.964	565.988	323.591	569.11	341.358	580.741	337.444	584.264	332.743	579.101	341.084	576.397	331.231	565.974	320.31	569.204
324.094	552.457	318.616	562.11	311.024	561.992	321.944	564.594	312.353	561.553	330.242	566.781	317.097	560.05	325.356	562.539	317.916	571.284	332.99	569.632	323.269	566.241	336.327	571.55	328.768	569.192	319.038	555.454	316.967	555.584	337.425	573.01	326.508	569.027	330.553	566.031	324.265	569.029	341.531	581.398	337.078	584.815	333.045	579.488	341.088	577.081	331.84	565.955	320.982	569.148
323.763	552.772	319	562.414	311.19	562.625	322.362	564.887	312.532	562.183	330.585	567.113	317.101	560.71	326.021	562.552	318.58	571.328	333.319	570.018	323.861	566.006	336.3	572.22	329.124	569.523	318.728	555.825	316.62	555.947	337.545	573.686	327.189	568.952	330.973	566.346	324.939	568.939	341.626	582.084	336.524	585.086	333.208	580.027	341.019	577.767	332.486	565.98	321.654	569.088
323.35	552.989	319.269	562.822	311.43	563.227	322.703	565.208	312.834	562.765	331.06	567.336	317.147	561.368	326.639	562.793	319.252	571.312	333.952	570.054	324.023	565.47	336.247	572.889	329.345	569.92	318.294	556.021	316.284	556.247	337.597	574.375	327.721	569.071	331.238	566.728	325.582	568.996	341.662	582.777	335.855	585.161	333.891	580.049	341.022	578.412	333.076	566.192	322.325	569.025
323.146	553.412	319.714	563.003	311.78	563.777	322.981	565.555	313.395	562.937	330.994	567.987	317.222	562.023	326.931	563.264	319.923	571.255	334.597	570.029	324.19	564.93	336.178	573.556	329.78	570.19	317.65	555.922	315.959	556.561	337.573	575.067	327.971	569.553	331.549	567.077	326.021	569.264	341.649	583.47	335.175	585.097	334.579	579.989	341.176	578.986	333.099	566.873	322.997	568.96
322.841	553.755	320.368	562.91	312.352	563.999	323.326	565.972	313.832	563.175	331.069	568.56	317.348	562.671	327.032	563.85	320.592	571.181	334.999	570.255	324.798	564.68	336.096	574.222	330.081	570.574	317.209	556.191	315.658	556.989	337.483	575.751	328.361	569.835	332.012	567.332	326.046	569.899	341.596	584.16	334.498	585.006	335.26	579.949	341.777	579.095	333.046	567.561	323.668	568.898
322.417	554.005	320.847	563.194	312.978	564.07	323.653	565.969	313.924	563.702	331.313	569.036	317.58	563.281	327.613	563.919	321.261	571.101	335.011	570.894	325.449	564.577	336.015	574.888	330.033	571.236	316.959	556.622	315.111	557.074	337.304	576.403	328.885	569.949	332.017	567.937	326.617	569.985	341.496	584.845	333.826	584.94	335.916	580.059	342.223	579.44	332.967	568.24	324.34	568.838
321.807	553.961	321.071	563.652	313.625	563.955	323.965	565.559	314.395	563.959	331.778	569.222	317.917	563.803	327.89	564.307	321.929	571.015	335.575	570.922	326.114	564.548	335.937	575.554	329.96	571.897	317.058	557.264	314.461	557.011	336.914	576.942	329.561	569.873	332.063	568.52	327.278	569.994	341.265	585.493	333.166	584.991	336.043	580.625	342.454	580.084	333.113	568.842	325.013	568.789
321.288	554.053	320.979	564.307	313.875	564.354	324.222	565.035	314.98	564.067	332.114	569.545	318.478	564.088	328.027	564.843	322.597	570.928	336.215	570.917	326.779	564.588	335.872	576.221	329.997	572.497	316.853	557.766	313.811	556.931	336.379	577.13	329.972	570.304	332.321	568.953	327.933	570.035	340.84	585.887	333.008	585.512	336.325	581.025	342.537	580.769	333.568	569.093	325.686	568.753
321	554.488	321.199	564.78	313.968	564.92	324.655	564.668	315.64	563.983	332.309	570.018	319.1	564.068	328.61	564.926	323.265	570.844	336.853	570.994	327.415	564.75	335.847	576.89	330.268	572.976	316.476	558.102	313.325	557.113	335.945	577.363	330.163	570.871	332.795	569.192	328.005	570.631	340.234	586.024	332.795	585.976	337.004	581.032	342.57	581.458	334.05	569.302	326.36	568.73
321.005	555.074	321.522	565.127	313.919	565.572	325.283	564.474	316.302	563.934	332.79	570.207	319.669	564.047	328.914	565.32	323.933	570.765	337.25	571.465	327.891	565.061	335.91	577.515	330.706	573.192	315.832	558.031	312.948	557.451	335.839	577.946	330.145	571.553	333.106	569.581	328.302	570.995	340.124	586.547	332.143	586.011	337.278	581.64	342.557	582.148	334.12	569.937	327.032	568.765
320.997	555.644	321.957	565.32	314.3	565.91	325.936	564.394	316.802	564.081	333.121	570.531	319.95	564.465	329.026	565.908	324.605	570.711	337.524	572.038	327.944	565.683	336.282	577.943	331.083	573.459	315.191	557.927	312.711	557.885	335.268	578.086	330.044	572.231	333.114	570.249	328.963	570.99	340.094	587.165	332.087	586.566	337.407	582.304	342.47	582.834	334.685	570.015	327.617	568.967
320.596	555.976	322.165	565.837	314.85	566.068	326.593	564.357	316.965	564.624	333.294	570.993	319.983	565.048	328.97	566.576	325.277	570.683	337.647	572.688	328.4	565.915	336.689	578.218	331.261	573.942	314.55	557.822	312.232	558.016	334.83	578.407	329.963	572.911	333.048	570.917	329.019	571.634	340.026	587.788	332.089	587.218	337.4	582.994	342.243	583.47	335.353	570.008	328.096	569.307
320.046	556.032	322.532	566.199	315.501	565.968	327.252	564.367	317.389	564.838	333.83	571.168	319.998	565.637	329.322	566.875	325.949	570.689	337.676	573.349	329.001	565.971	337.004	578.518	331.827	573.923	313.903	557.782	311.584	557.938	334.668	579.064	329.956	573.55	332.979	571.586	329.028	572.297	339.475	588.102	332.014	587.878	337.186	583.648	341.865	583.943	335.98	570.102	328.207	569.825
319.44	555.971	323.178	566.271	315.817	566.283	327.898	564.488	317.788	565.096	334.127	571.586	320.422	565.929	329.817	567.057	326.573	570.878	337.657	574.01	329.662	565.874	336.896	579.18	332.452	573.912	313.328	557.963	310.934	557.87	334.896	579.683	330.347	573.917	332.919	572.255	329.027	572.942	338.824	588.156	331.506	588.277	336.687	583.928	341.217	583.989	336.077	570.681	328.665	569.957
319.136	556.342	323.714	566.006	316.054	566.712	328.487	564.723	318.01	565.604	334.185	572.246	320.723	566.258	329.976	567.605	326.993	571.256	337.578	574.667	330.321	565.883	337.082	579.737	333.02	574.154	312.836	558.306	310.364	558.005	335.366	579.968	330.728	574.233	333.146	572.768	329.65	572.981	338.134	588.091	330.907	588.551	336.167	584.121	341.052	584.501	336.417	571.028	329.317	569.903
318.822	556.676	324.065	565.587	316.507	566.941	329	565.106	317.993	566.236	334.13	572.912	320.984	566.617	329.982	568.233	327.133	571.872	337.384	575.295	330.856	566.067	337.467	580.13	333.245	574.723	312.778	558.949	309.866	558.318	336.035	579.969	331.086	574.533	333.544	573.1	330.045	573.337	337.448	587.987	330.242	588.702	336.09	584.696	340.797	584.92	337.048	571.11	329.887	570.12
318.497	556.977	324.13	564.983	317.096	566.964	329.071	565.721	318.096	566.749	334.062	573.577	321.365	567.03	330.039	568.795	327.048	572.528	337.052	575.781	331.061	566.629	338.134	580.095	333.35	575.373	312.795	559.593	309.932	558.964	336.698	579.995	331.38	574.862	334.133	573.217	330.241	573.952	336.759	587.934	329.561	588.752	335.599	584.971	340.163	584.959	337.354	571.72	330.121	570.628
318.175	557.308	324.677	564.734	317.691	566.976	329.088	566.344	318.583	566.939	333.983	574.241	321.924	567.186	330.587	568.933	327.258	572.92	336.487	575.996	331.027	567.266	338.798	580.011	333.361	576.037	312.875	560.238	310.033	559.607	337.153	580.376	331.871	575.155	334.292	573.841	330.255	574.631	336.243	588.105	328.88	588.761	334.965	585.065	340.03	585.538	337.539	572.377	330.155	571.287
317.858	557.626	325.314	564.591	317.988	567.442	329.094	566.939	318.871	567.347	333.9	574.904	322.583	567.187	330.852	569.338	327.861	572.977	336.198	576.344	331.096	567.784	339.424	579.989	333.33	576.701	312.993	560.878	310.172	560.246	337.442	580.972	332.318	575.548	334.354	574.501	330.241	575.31	335.994	588.607	328.198	588.73	334.274	584.973	340.003	586.192	337.634	573.065	330.06	571.955
317.549	557.919	325.972	564.543	318.026	568.026	329.621	567.055	319.014	567.868	333.823	575.568	323.241	567.135	331.081	569.766	327.947	573.557	335.908	576.692	331.617	567.934	339.931	580.223	333.281	577.364	313.111	561.518	310.224	560.894	337.528	581.657	332.512	576.203	334.327	575.171	330.207	575.989	335.576	588.838	327.523	588.627	333.585	584.943	340.029	586.861	337.668	573.76	330.087	572.565
317.101	558.21	326.632	564.574	317.986	568.63	330.025	567.302	318.931	568.528	333.752	576.233	323.898	567.071	331.588	569.897	328.26	573.884	335.493	576.982	331.855	568.36	340.168	580.644	333.215	578.026	313.229	562.158	310.133	561.506	337.52	582.346	332.621	576.878	334.043	575.755	330.156	576.667	335.196	589.179	326.869	588.448	333.157	585.204	339.416	586.946	337.657	574.455	330.288	573.034
316.745	558.592	327.268	564.693	318.411	568.906	330.072	567.906	319.299	568.846	333.709	576.9	324.554	566.998	332.211	569.892	328.851	573.904	334.881	576.966	332.109	568.764	340.428	581.04	333.14	578.687	313.313	562.802	309.849	562.067	337.428	583.023	332.692	577.558	333.578	576.057	330.099	577.345	334.89	589.655	326.286	588.17	332.991	585.754	339.106	587.321	337.607	575.147	330.931	573.075
316.725	559.227	327.857	564.958	318.718	569.24	330.59	568.045	319.689	569.132	333.703	577.566	325.21	566.924	332.8	569.98	329.507	573.942	334.268	577.017	332.603	568.911	341.013	581.185	333.063	579.348	313.355	563.448	309.279	562.326	337.219	583.674	332.727	578.242	332.933	576.07	330.038	578.022	334.966	590.344	326.031	587.603	332.466	585.908	338.96	587.856	337.503	575.835	331.33	573.521
316.998	559.683	327.984	565.521	318.961	569.614	331.014	568.28	319.875	569.538	333.737	578.229	325.867	566.861	333.165	570.496	330.089	574.174	333.753	577.366	332.916	569.331	341.236	581.714	332.987	580.009	313.34	564.096	308.657	562.485	336.665	583.913	332.719	578.927	332.768	576.713	329.977	578.699	335.055	591.032	325.705	587.242	332.16	586.292	338.368	587.996	337.261	576.477	331.607	574.129
317.406	560.036	328.197	565.957	319.359	570.006	331.066	568.888	320.265	569.91	334.013	578.799	326.525	566.809	333.302	571.127	330.592	574.599	333.627	577.958	333.082	569.874	341.24	582.334	332.931	580.672	313.099	564.673	308.005	562.534	336.249	584.21	332.683	579.611	332.784	577.349	329.924	579.377	335.137	591.72	325.363	586.943	331.931	586.757	337.712	587.996	336.845	576.892	331.786	574.778
317.889	560.224	328.825	565.966	319.903	570.193	331.595	569.001	320.773	570.164	334.489	579.076	327.183	566.827	333.343	571.794	330.897	575.198	333.738	578.545	333.01	570.538	340.956	582.885	332.939	581.318	312.714	565.121	307.352	562.528	336.075	584.662	332.619	580.293	332.982	577.961	329.879	580.055	335.155	592.412	325.074	586.538	331.412	586.926	337.165	588.084	336.22	577.005	331.917	575.438
318.102	560.672	329.467	565.971	320.559	570.219	332.236	569.005	321.437	570.155	335.137	579.098	327.691	567.053	333.318	572.466	331.152	575.819	334.179	578.985	332.954	571.202	340.423	583.051	333.084	581.924	312.108	565.326	306.698	562.498	335.58	584.93	332.47	580.961	333.637	577.969	329.852	580.734	334.804	592.88	324.718	586.217	331.149	587.354	337.075	588.676	336.096	577.539	332.021	576.104
318.118	561.31	329.937	566.154	321.216	570.172	332.88	569.023	322.1	570.101	335.747	579.103	328.073	567.448	333.266	573.136	331.358	576.459	334.79	579.062	333.06	571.729	340.015	583.287	333.618	582.061	311.468	565.37	306.047	562.438	334.979	585.007	332.197	581.563	333.95	578.317	329.893	581.41	334.264	593.117	324.362	585.899	331.05	587.924	336.598	588.952	335.736	577.881	332.096	576.774
318.067	561.947	329.977	566.775	321.871	570.115	333.017	569.531	322.762	570.033	336.052	579.442	328.318	567.815	333.201	573.805	331.498	577.118	335.446	579.016	333.549	571.926	340.07	583.946	334.152	582.242	310.821	565.35	305.397	562.367	334.337	584.985	331.802	582.07	334.01	578.921	330.128	581.887	333.58	593.001	324.057	585.525	331.12	588.611	335.981	589.047	335.161	578.033	332.137	577.447
318.01	562.585	330.459	566.952	322.526	570.047	333.188	569.999	323.422	569.956	336.13	580.03	328.641	568.141	333.126	574.474	331.613	577.781	336.1	578.901	333.886	572.318	340.003	584.582	334.433	582.836	310.176	565.27	304.747	562.29	334.082	585.46	331.207	582.122	334.64	579.012	330.738	581.939	333.173	593.293	323.7	585.202	330.666	589.014	335.296	588.958	334.472	577.973	332.157	578.121
317.946	563.221	330.934	567.151	323.181	569.976	333.839	569.99	324.084	569.89	336.769	580.057	329.035	568.429	333.045	575.142	331.705	578.447	336.671	579.046	334.07	572.826	339.733	585.019	334.58	583.478	309.534	565.165	304.098	562.207	333.713	585.777	330.935	582.52	335.29	578.994	331.152	582.397	333.004	593.789	323.351	584.87	330.063	589.205	334.611	588.936	334.015	578.281	332.151	578.795
317.889	563.859	331.042	567.754	323.836	569.908	334.475	570.005	324.747	569.847	337.192	580.404	329.289	568.783	332.965	575.81	331.765	579.117	337.062	579.384	333.986	573.488	339.085	585.029	334.664	584.135	308.894	565.048	303.449	562.122	333.312	586.058	330.766	583.031	335.954	578.906	331.436	582.979	333.101	594.475	323.03	584.506	329.367	589.179	334.163	589.18	333.881	578.727	332.114	579.468
317.846	564.497	330.998	568.397	324.491	569.843	334.966	570.169	325.411	569.851	337.431	581.011	329.653	569.096	332.889	576.478	331.804	579.789	337.039	580.041	333.88	574.147	338.437	585.024	334.676	584.8	308.256	564.919	302.801	562.037	333.013	586.507	330.152	583.096	336.61	578.948	331.565	583.646	332.785	595.038	322.675	584.179	328.677	589.088	334.003	589.739	334.438	579.039	332.053	580.139
317.828	565.136	330.932	569.052	325.148	569.802	335.012	570.787	325.814	570.196	337.495	581.675	330.132	569.366	332.834	577.148	331.823	580.462	337.113	580.621	333.77	574.806	338	585.232	334.606	585.459	307.618	564.791	302.151	561.958	333.019	587.139	329.998	583.595	336.946	579.319	331.633	584.321	332.28	595.396	322.331	583.842	327.985	589.005	333.493	589.888	335.102	579.045	331.961	580.806
318.033	565.666	330.947	569.707	325.804	569.793	335.466	570.986	326.136	570.601	337.498	582.34	330.171	570.014	332.809	577.819	331.798	581.135	337.351	581.05	333.665	575.465	337.991	585.878	334.462	586.099	306.98	564.665	301.5	561.893	332.934	587.695	330.003	584.261	337.044	579.922	331.676	584.999	331.62	595.554	322.004	583.491	327.355	588.999	333.147	590.248	335.793	578.972	331.802	581.46
318.359	566.083	331.389	569.929	326.46	569.823	336.013	571.132	326.437	570.916	337.439	583.002	330.162	570.671	332.831	578.489	331.753	581.806	337.966	581.119	333.586	576.128	337.451	585.996	334.187	586.694	306.338	564.555	300.848	561.841	332.476	587.986	329.92	584.895	336.97	580.587	331.693	585.679	330.936	595.474	321.661	583.157	327.126	589.457	332.963	590.792	336.484	578.897	331.574	582.087
318.89	566.189	331.995	569.971	326.863	570.211	336.313	571.688	326.762	571.247	337.192	583.613	330.109	571.329	333.239	578.857	331.69	582.476	338.256	581.609	333.534	576.792	337.004	586.232	333.672	587.007	305.695	564.462	300.195	561.83	332.212	588.356	329.401	585.059	337.306	580.928	331.664	586.358	330.367	595.173	321.319	582.824	326.787	589.939	333.049	591.477	336.857	579.29	331.255	582.673
319.073	566.634	332.638	569.927	327.184	570.592	336.457	572.311	327.091	571.583	336.736	583.921	330.038	571.985	333.638	579.175	331.597	583.142	338.394	582.244	333.53	577.458	336.918	586.878	333.068	587.144	305.049	564.384	299.557	561.91	331.895	588.754	328.971	585.304	337.902	581.041	331.606	587.035	329.966	594.7	320.978	582.488	326.325	590.347	332.727	591.846	337.196	579.665	330.719	583.036
319.055	567.272	333.026	570.316	327.415	570.928	336.513	572.966	327.407	571.922	336.162	584.036	329.968	572.641	333.93	579.484	331.462	583.801	338.389	582.906	333.649	578.106	336.983	587.54	332.414	587.034	304.4	564.358	298.971	562.081	331.479	589.172	328.948	585.962	338.566	580.965	331.519	587.709	329.954	594.021	320.651	582.138	325.651	590.518	332.278	592.109	337.537	579.979	330.115	583.227
318.979	567.908	333.254	570.898	327.838	571.224	336.479	573.624	327.748	572.242	336.081	584.59	329.9	573.298	334.285	579.847	331.295	584.453	338.202	583.524	333.889	578.695	337.07	588.205	332.176	587.383	303.755	564.384	298.887	562.627	330.788	589.192	328.408	586.282	338.881	581.305	331.32	588.355	329.915	593.383	320.306	581.804	324.963	590.613	332.1	592.568	338.053	580.305	329.449	583.217
318.916	568.544	333.257	571.559	328.098	571.652	336.331	574.255	328.086	572.563	335.717	584.893	329.873	573.957	334.771	580.03	331.074	585.088	337.857	583.982	334.329	579.168	337.147	588.871	331.967	587.85	303.113	564.462	299.188	562.927	330.097	589.172	327.767	586.481	339.068	581.802	330.936	588.801	329.672	592.951	319.954	581.476	324.269	590.672	331.724	593.022	338.267	580.851	328.792	583.069
318.866	569.181	333.215	572.219	328.048	572.307	336.07	574.802	328.395	572.902	335.14	584.997	329.982	574.533	335.438	579.946	330.802	585.7	337.209	583.976	334.939	579.362	337.078	589.517	331.488	588.263	302.532	564.728	299.807	563.021	329.407	589.118	327.09	586.577	339.598	581.922	330.422	589.089	329.041	592.899	319.634	581.11	323.574	590.698	331.209	593.357	338.21	581.494	328.307	583.16
319.056	569.722	333.15	572.877	327.976	572.961	335.495	574.948	328.967	572.903	334.48	584.938	330.285	574.99	335.838	580.269	330.486	586.289	337.032	584.448	335.593	579.439	336.786	589.949	330.88	588.469	302.036	565.101	300.456	562.945	328.718	589.046	326.406	586.586	340.014	582.288	330.147	589.417	328.932	592.326	319.285	580.78	322.877	590.681	330.527	593.45	337.778	581.927	328.023	583.541
319.392	570.078	333.066	573.534	328.025	573.543	335.183	575.296	329.578	572.919	334.096	585.246	330.771	575.186	336.171	580.612	330.089	586.827	337.026	585.096	336.259	579.402	336.167	590.043	330.228	588.588	301.648	565.605	300.851	563.18	328.029	588.978	325.724	586.551	340.296	582.807	330.081	589.957	328.619	591.959	318.934	580.45	322.183	590.635	329.852	593.355	337.302	582.184	327.649	583.856
319.935	570.153	332.979	574.19	328.317	573.986	334.984	575.728	330.065	573.279	333.93	585.822	331.092	575.535	336.445	580.938	329.609	587.287	337.009	585.741	336.92	579.311	335.519	590.006	329.565	588.641	301.445	566.212	300.984	563.74	327.339	588.92	325.046	586.467	340.232	583.464	330.085	590.608	328.001	591.9	318.623	580.059	321.492	590.554	329.304	593.072	336.981	582.526	327.32	584.19
320.101	570.62	332.89	574.846	328.896	573.95	334.497	575.907	330.282	573.856	334.011	586.483	331.101	576.191	336.969	581.217	329.074	587.682	336.565	585.959	337.579	579.201	335.076	590.213	328.9	588.65	301.307	566.841	301.465	563.864	326.647	588.897	324.421	586.214	339.837	583.831	329.709	591.124	327.948	591.265	318.038	580.048	320.818	590.388	328.922	592.576	337.062	583.217	327.039	584.548
320.321	571.041	332.803	575.502	329.517	573.928	334.187	576.261	330.381	574.507	333.733	586.837	331.042	576.848	337.329	581.666	328.468	587.967	336.074	586.127	338.234	579.076	334.946	590.805	328.236	588.629	301.249	567.487	301.922	564.122	326.224	589.207	324.101	585.75	339.36	584.101	329.147	591.392	327.542	590.924	317.421	580.026	320.287	590.038	329.028	591.899	336.854	583.753	326.704	585.039
320.911	571.104	332.721	576.159	330.091	574.186	333.971	576.706	330.39	575.171	333.243	587.017	330.971	577.504	337.484	582.315	327.825	588.143	336.035	586.732	338.894	578.975	335.032	591.46	327.575	588.561	301.247	568.136	302.33	564.581	325.905	589.658	323.947	585.195	339.117	584.484	328.49	591.493	326.872	590.824	316.94	579.671	319.896	589.578	328.924	591.289	336.495	584.117	326.195	585.325
321.285	571.515	332.648	576.816	330.451	574.694	333.51	576.89	330.364	575.835	333.045	587.523	330.899	578.16	337.505	582.986	327.165	588.245	335.595	586.959	339.501	578.998	335.087	592.123	326.931	588.412	301.269	568.786	302.535	565.191	325.642	590.201	323.399	585.077	338.748	584.824	327.819	591.408	326.18	590.874	316.892	579.047	319.73	589.076	328.602	590.779	335.993	584.281	325.534	585.42
321.543	572.086	332.602	577.477	330.714	575.288	333.125	577.216	330.321	576.499	333.013	588.124	330.862	578.818	337.467	583.653	326.494	588.242	334.978	587.007	340	579.264	335.07	592.785	326.369	588.159	301.323	569.434	302.693	565.823	325.008	590.379	323.135	584.669	338.271	585.05	327.293	591.075	325.489	590.944	316.954	578.368	319.151	589.025	327.931	590.645	335.817	584.827	324.867	585.344
321.66	572.714	332.59	578.138	330.873	575.927	332.844	577.639	330.26	577.162	333.027	588.737	330.924	579.434	337.37	584.317	325.836	588.131	334.326	586.968	340.205	579.679	334.533	593.014	326.039	587.67	301.403	570.08	302.808	566.467	324.325	590.459	322.928	584.19	337.605	584.957	326.912	590.627	324.8	591.022	317.052	577.692	318.516	588.988	327.25	590.634	335.362	585.038	324.334	585.067
321.734	573.348	332.614	578.797	330.98	576.576	333.339	577.887	330.191	577.823	332.51	588.933	331.181	579.958	336.98	584.816	325.198	587.941	334.075	587.372	340.498	580.031	333.919	593.08	325.756	587.258	301.494	570.724	302.892	567.116	323.634	590.473	322.382	584.01	337.224	585.241	326.79	590.111	324.11	591.101	316.802	577.221	317.989	588.742	326.598	590.753	334.69	584.998	323.927	584.63
321.775	573.985	332.746	579.443	331.057	577.229	333.713	578.199	330.117	578.485	332.212	589.283	331.663	580.143	336.514	585.108	324.602	587.637	333.909	587.873	341.086	580.196	333.257	592.98	325.393	586.985	301.595	571.367	302.96	567.766	322.949	590.378	321.736	584.022	336.917	585.633	326.323	589.886	323.418	591.15	316.429	576.876	317.809	588.239	326.077	591.123	334.149	585.182	323.756	584.148
321.749	574.624	333.115	579.912	331.093	577.887	333.988	578.564	330.041	579.146	332.021	589.728	332.077	580.368	335.99	585.222	324.198	587.137	333.335	587.937	341.356	580.748	333.125	593.483	324.732	587.059	301.701	572.009	303.003	568.419	322.372	590.105	321.206	583.919	336.552	585.971	325.958	589.573	322.733	591.132	315.949	576.661	317.481	587.889	325.898	591.693	333.882	585.628	323.285	584.004
321.683	575.258	333.649	580.229	331.1	578.545	334.36	578.852	329.972	579.808	331.585	590.156	332.191	580.896	335.871	585.8	323.959	586.551	332.995	588.342	341.518	581.388	332.841	593.949	324.275	586.834	301.81	572.651	303.033	569.073	321.922	589.678	321.05	583.367	335.954	585.986	326.017	588.898	322.059	591.012	316.017	575.994	316.971	587.712	325.641	592.186	333.617	586.062	322.636	584.046
321.569	575.885	334.303	580.19	331.087	579.202	334.697	579.174	329.915	580.47	331.012	590.386	332.686	581.086	335.454	586.03	323.973	585.886	332.808	588.925	341.588	582.051	332.342	594.334	323.92	586.48	301.92	573.292	303.057	569.726	321.801	589.129	320.602	583.142	335.379	586.039	325.901	588.312	322.014	590.378	315.925	575.414	316.82	587.14	324.979	592.373	332.925	586.038	322.138	583.803
321.313	576.462	334.953	580.093	331.04	579.858	334.999	579.53	329.884	581.134	330.353	590.481	333.188	581.315	334.792	585.979	323.871	585.332	332.823	589.588	341.589	582.717	331.682	594.395	323.665	586.056	302.019	573.935	303.07	570.38	321.296	589.007	320.217	582.853	335.032	586.426	325.593	587.92	321.689	590.028	315.657	574.941	316.339	586.952	324.294	592.441	332.235	585.965	321.857	583.396
320.942	576.909	335.574	579.992	330.959	580.511	335.344	579.832	330.076	581.675	329.686	590.477	333.394	581.933	334.214	586.104	323.6	584.941	332.868	590.249	341.546	583.381	331.021	594.366	323.112	586.002	302.108	574.579	303.064	571.035	320.638	589.024	320.045	582.34	334.716	586.742	325.016	587.826	321.05	589.986	315.18	574.759	315.67	586.973	323.606	592.448	331.582	585.98	321.646	582.947
320.367	577.1	335.889	580.369	330.849	581.158	335.836	579.948	330.423	582.08	329.028	590.393	333.483	582.58	333.921	586.484	323.051	584.818	332.931	590.91	341.445	584.039	330.365	594.249	322.504	585.996	302.124	575.227	303.047	571.689	320.075	588.829	319.576	582.126	334.366	587.054	324.877	587.29	321.017	589.326	314.867	574.39	315.118	586.819	322.917	592.396	330.994	586.173	321.138	582.787
319.751	577.06	336.213	580.688	330.672	581.79	336.488	579.862	331.015	582.184	328.421	590.215	333.506	583.237	333.799	587.015	322.88	584.322	333.005	591.57	341.161	584.614	330.101	593.716	322.067	585.703	301.916	575.713	303.019	572.342	319.868	588.344	319.217	581.804	333.923	587.394	324.575	586.921	320.611	589.036	314.635	573.934	314.901	586.314	322.303	592.114	330.868	586.737	320.874	582.367
319.221	577.068	336.554	580.967	330.396	582.375	337.004	580.196	331.305	582.675	328.108	589.728	333.448	583.893	333.202	587.097	322.596	583.936	333.075	592.23	340.737	584.993	329.8	593.306	321.796	585.321	301.507	576.053	302.98	572.995	319.6	587.935	319.024	581.314	333.854	588.007	324	586.832	320.06	588.888	314.18	573.756	314.634	585.813	322.007	591.626	330.538	587.089	320.63	581.939
319.089	577.566	337.044	581.29	330.033	582.89	337.38	580.667	331.451	583.317	327.818	589.275	333.228	584.495	332.918	587.521	322.024	583.833	333.14	592.89	340.114	585.034	329.453	593.029	321.528	584.948	301.207	576.341	302.93	573.647	319.036	587.816	318.54	581.117	333.885	588.677	323.893	586.26	320.009	588.245	313.91	573.306	313.981	585.605	321.938	591.016	329.974	587.209	319.961	582.015
318.725	577.834	337.332	581.79	329.435	583.064	337.593	581.286	331.488	583.98	327.487	588.904	332.875	584.963	332.86	588.177	321.879	583.315	333.18	593.552	339.991	585.577	329.155	592.65	321.052	584.721	300.893	576.683	302.848	574.297	318.882	587.275	318.207	580.767	333.956	589.345	323.517	585.98	319.53	588.035	313.641	572.788	313.292	585.601	321.266	591.015	329.887	587.833	319.379	581.916
318.251	577.996	337.444	582.437	328.809	583.063	337.665	581.939	331.45	584.641	326.82	588.911	332.248	584.993	332.926	588.846	321.575	582.945	333.155	594.212	339.743	585.997	328.826	592.303	320.983	584.182	300.562	577.092	302.742	574.942	318.508	586.979	317.985	580.306	334.033	590.013	322.846	586.02	319.059	587.822	313.009	572.543	312.637	585.74	321.021	590.585	329.43	588.087	318.93	581.659
318.087	578.483	337.361	583.09	328.199	582.99	337.687	582.596	331.33	585.281	326.154	588.955	332.039	585.429	333.003	589.514	320.965	582.865	333.026	594.801	339.103	586.03	328.467	591.987	320.996	583.564	299.94	577.067	302.614	575.582	317.824	587.023	317.509	580.122	334.094	590.682	322.23	585.917	319.022	587.179	312.346	572.394	312.031	586.023	320.893	590.035	328.738	588.089	318.818	581.116
318.032	579.045	337.105	583.628	328.053	583.532	337.654	583.255	331.017	585.844	325.489	589.02	331.916	585.948	333.081	590.182	320.9	582.241	332.472	594.964	338.446	585.95	328.19	591.637	320.751	583.094	299.293	576.999	302.418	576.204	317.205	586.9	317.164	579.753	334.127	591.353	321.924	585.534	318.474	587.049	311.671	572.296	312.023	586.689	320.227	590.015	328.048	588.006	318.379	580.888
318.082	579.679	336.692	584.057	328.017	584.135	337.516	583.897	330.48	586.026	324.824	589.095	331.291	585.983	333.135	590.852	320.924	581.572	332.177	595.321	337.791	585.908	327.866	591.252	320.344	582.831	298.648	576.921	302.077	576.703	316.904	586.497	316.954	579.239	333.815	591.792	321.828	584.968	318.074	586.769	310.99	572.24	312.009	587.357	320.028	589.525	327.356	587.932	317.942	580.653
317.671	580.094	336.24	584.215	328.048	584.77	337.277	584.486	329.984	586.188	324.16	589.168	330.655	585.985	333.053	591.487	321.001	580.903	331.992	595.772	337.145	585.968	327.487	590.85	319.934	582.589	298.239	577.198	301.627	577.097	316.77	585.954	317.031	578.559	333.416	592.13	321.206	584.915	318.04	586.122	310.307	572.219	311.919	587.986	319.806	589.054	326.684	587.927	317.835	580.086
317.161	580.326	335.923	584.557	327.517	584.927	336.896	584.991	329.969	586.826	323.495	589.238	330.095	586.059	332.821	592.009	321.073	580.234	331.513	596.075	336.98	586.522	326.818	590.84	319.753	582.116	297.906	577.565	301.235	577.264	316.156	585.878	316.725	578.201	332.957	592.358	320.995	584.485	317.418	586.054	309.624	572.218	311.349	588.34	319.157	589	326.058	588.082	317.352	579.888
316.532	580.287	335.74	585.082	327.192	585.253	336.352	585.108	329.549	587.211	322.829	589.296	330.019	586.661	332.198	592.052	321.045	579.593	331.196	595.865	336.946	587.162	326.15	590.869	319.329	581.859	297.644	577.988	300.926	577.6	315.915	585.434	316.289	577.928	332.972	592.983	321.028	583.819	317.075	585.702	308.941	572.241	310.7	588.533	318.48	589.006	325.934	588.646	316.977	579.63
316.183	579.88	335.088	585.06	327.061	585.736	335.961	585.355	328.949	587.454	322.162	589.332	330.012	587.293	331.973	592.498	320.904	578.984	330.958	595.373	337.003	587.814	325.483	590.93	318.932	581.587	297.085	578.037	300.698	578.103	315.712	584.953	315.969	577.483	333.042	593.651	320.94	583.198	316.969	585.108	308.261	572.303	310.013	588.629	318.059	588.755	325.639	589.035	317.118	578.97
315.897	579.436	334.432	585.004	326.602	586.131	335.878	585.932	328.293	587.552	321.495	589.342	329.974	587.885	331.83	593.055	320.298	578.935	330.565	595.154	336.486	587.953	324.816	591.006	319.011	580.927	296.439	577.974	300.059	578.104	315.099	584.884	315.958	576.854	333.113	594.319	320.473	583	316.344	585.039	307.586	572.401	309.317	588.647	318.017	588.116	325.001	589.093	317.188	578.304
315.617	579.115	333.776	584.917	326.05	586.364	335.373	586.078	327.631	587.588	320.833	589.276	329.394	588.037	331.222	593.265	319.998	578.586	330.206	594.813	336.084	588.211	324.149	591.076	318.899	580.374	295.792	577.904	299.409	578.06	314.923	584.379	316.039	576.174	332.833	594.804	319.816	583.006	316.073	584.621	306.917	572.54	308.625	588.586	317.407	588.051	324.945	589.736	317.157	577.647
315.292	578.805	333.24	585.114	325.398	586.42	334.961	586.318	326.967	587.58	320.274	589.006	328.77	588.047	330.597	593.208	320.018	577.923	329.91	594.37	336.028	588.811	323.481	591.137	318.638	579.94	295.292	578.105	298.76	577.976	314.661	583.959	316.129	575.495	332.468	595.148	319.159	582.974	315.898	584.111	306.325	572.854	307.949	588.452	317.078	587.702	324.586	590.181	316.956	577.014
314.955	578.496	332.901	585.472	324.75	586.322	334.892	586.904	326.307	587.508	319.868	588.586	328.165	588.017	330.092	592.938	319.96	577.282	329.979	593.711	335.498	588.937	322.811	591.152	318.108	579.803	294.895	578.433	298.11	577.906	314.041	583.897	316.152	574.812	332.032	595.331	318.975	582.482	315.285	584.04	306.018	573.339	307.295	588.228	316.994	587.105	323.961	590.435	316.523	576.518
314.669	578.145	332.791	586.012	324.27	586.037	334.393	587.065	325.68	587.323	319.95	587.927	328.091	588.574	330.044	592.309	319.592	576.972	330.044	593.051	335.103	589.196	322.305	590.928	317.99	579.301	294.701	578.82	297.512	577.964	313.93	583.325	315.965	574.258	331.83	595.879	318.971	581.82	315.084	583.562	305.965	573.96	307.029	587.647	316.356	587.058	323.27	590.497	316.006	576.099
314.342	577.833	332.164	585.965	324.004	585.521	333.982	587.305	325.164	587.02	319.868	587.363	327.774	589.037	329.599	592.074	318.973	576.933	330.065	592.421	335.049	589.795	321.93	590.532	318.006	578.662	294.284	579.095	296.996	578.219	313.602	582.966	315.486	573.894	331.424	596.223	318.972	581.173	314.845	583.12	305.316	573.98	306.975	587.006	316.076	586.645	322.578	590.484	315.415	575.773
313.986	577.548	331.548	585.996	323.687	585.173	333.998	587.95	325.042	586.429	319.616	586.95	327.267	589.416	328.99	592.017	319.003	576.266	329.651	592.104	334.516	589.908	321.685	590.112	317.838	578.11	293.764	579.339	296.825	578.676	312.99	582.889	314.823	573.995	330.772	596.313	318.473	580.999	314.235	583.044	305.039	574.367	307.055	586.342	315.914	586.111	321.899	590.387	314.788	575.528
313.712	577.189	330.983	586.166	323.232	585.002	333.963	588.577	324.658	586.153	318.954	587.013	326.627	589.576	328.324	592.058	318.996	575.616	329.299	591.785	333.897	589.936	321.188	589.994	317.409	577.871	293.554	579.949	296.555	579.044	312.995	582.212	314.294	573.874	330.244	596.002	318.022	580.768	313.566	583.054	304.956	574.952	306.637	585.858	315.295	586.037	321.264	590.14	314.149	575.316
313.394	576.871	330.971	586.78	322.579	585.074	333.756	589.034	324.225	585.945	318.377	586.908	325.98	589.698	328.1	591.617	318.918	575.021	328.99	591.464	333.248	589.937	320.55	590.034	316.945	577.688	293.442	580.58	295.974	579.169	312.971	581.544	313.928	573.482	329.935	595.555	317.983	580.126	313.083	582.812	304.301	575.013	306.049	585.596	315.073	585.571	321.071	589.584	313.499	575.137
313.022	576.604	330.953	587.403	322.194	584.758	333.129	589.051	324.085	585.427	317.919	586.661	325.325	589.787	327.884	591.154	318.288	574.978	328.649	591.129	332.943	590.432	320.137	589.725	316.831	577.148	293.41	581.229	295.76	579.697	312.841	580.97	314.016	572.803	329.849	594.976	317.434	580.009	312.856	582.221	303.633	574.967	305.366	585.483	314.846	585.112	320.808	589.145	312.841	574.994
312.755	576.259	330.865	587.99	321.868	584.397	332.962	589.548	323.694	585.127	317.801	586.131	324.667	589.837	327.311	591.048	318.004	574.591	328.334	590.803	332.796	591.034	319.829	589.332	316.41	576.903	293.505	581.87	295.744	580.303	312.179	580.954	313.848	572.298	329.26	594.891	317.002	579.757	312.94	581.534	302.96	574.895	304.671	585.476	314.244	585.026	320.228	589.05	312.178	574.872
312.442	575.934	330.332	588.1	321.581	584.05	332.97	590.201	323.16	584.975	317.395	585.877	324.008	589.873	327.117	590.591	317.904	574.018	328.037	590.475	332.827	591.7	319.532	588.954	315.961	576.692	293.717	582.454	296.008	580.857	311.957	580.477	313.488	571.933	328.942	594.534	316.927	579.109	313.009	580.846	302.299	574.95	303.988	585.58	314.117	584.521	320.064	588.502	311.511	574.773
312.005	575.674	329.956	588.372	321.245	583.745	333.056	590.855	322.5	585.047	316.942	585.664	323.349	589.895	326.89	590.13	317.265	573.954	327.697	590.041	332.908	592.362	318.867	589.031	316.012	576.033	294.056	582.977	296.533	581.032	311.959	579.797	313.147	571.638	328.859	593.938	316.998	578.438	312.996	580.218	302.017	575.411	303.396	585.832	314.087	583.9	320.027	587.866	310.839	574.713
311.938	575.128	329.889	588.966	320.916	583.415	333.022	591.486	322.164	584.724	316.814	585.131	322.689	589.895	326.341	589.888	316.608	573.984	327.178	589.833	332.997	593.024	318.335	588.882	315.942	575.424	294.672	583.027	297.016	581.205	312.054	579.111	312.821	571.245	328.201	593.866	317.039	577.769	312.436	580.076	301.935	576.04	302.97	586.307	314.066	583.226	320.058	587.2	310.167	574.666
311.998	574.493	329.302	589.015	320.619	583.013	332.828	591.985	321.93	584.275	316.398	584.885	322.029	589.88	325.694	589.871	315.942	574.058	326.517	589.809	333.086	593.686	317.916	588.582	315.735	574.93	295.297	583.04	297.04	581.826	312.13	578.423	312.433	570.9	327.536	593.86	317.018	577.108	312.121	579.673	302.014	576.714	302.751	586.74	313.622	582.729	319.471	587.002	309.493	574.63
312.093	573.86	328.666	589.029	320.035	583	332.212	592.027	321.463	584.093	315.947	584.674	321.37	589.851	325.024	589.92	315.281	574.034	325.856	589.86	333.088	594.347	317.722	588.146	315.16	574.861	295.913	583.04	297.487	582.061	312.132	577.741	311.752	570.967	326.866	593.911	316.416	577.034	311.988	579.105	301.556	576.918	302.399	587.083	313.075	582.343	318.822	586.981	308.819	574.634
312.148	573.224	328.058	589.098	319.455	582.968	331.997	592.471	321.185	583.714	315.829	584.134	320.713	589.786	324.356	590	315.035	573.609	325.195	589.923	332.873	594.819	317.331	587.856	314.922	574.438	296.007	583.588	298.126	582.1	312.013	577.072	311.071	571.043	326.198	593.987	316.063	576.705	312.069	578.417	301.135	577.175	301.9	587.35	312.446	582.066	318.227	586.962	308.145	574.654
312.155	572.598	327.938	589.637	319.056	582.661	331.861	593.021	320.95	583.289	315.396	583.899	320.059	589.699	323.688	590.084	314.918	573.061	324.535	589.995	332.341	595	316.932	587.568	314.745	573.955	295.987	584.222	298.776	582.025	311.392	576.969	310.461	571.006	325.53	594.061	316.001	576.08	311.653	578.133	301.038	577.755	301.914	588.043	311.779	581.888	318.066	586.416	307.472	574.69
311.844	572.117	327.681	590.045	318.78	582.286	331.279	593.252	320.487	583.096	314.971	583.669	319.409	589.588	323.021	590.165	314.283	573.017	323.875	590.067	332.144	595.433	317.018	586.903	314.085	574.002	295.894	584.866	299.425	581.949	310.725	576.969	310.035	570.663	324.862	594.13	316.027	575.407	311.231	577.847	300.522	577.89	301.971	588.735	311.103	581.748	317.644	586.145	306.8	574.748
311.371	571.903	327.035	590.078	318.499	581.927	330.67	593.228	320.196	582.727	315.037	583.01	318.78	589.395	322.352	590.237	314.042	572.582	323.214	590.129	331.87	595.869	316.889	586.358	313.471	573.954	295.937	585.491	300.073	581.89	310.073	577.004	309.759	570.252	324.191	594.166	315.698	575.075	311.051	577.351	299.909	577.936	302.001	589.397	310.421	581.638	317.232	585.871	306.132	574.837
310.739	571.947	326.379	590.018	318.096	581.674	330.127	593.009	319.949	582.312	314.959	582.392	318.278	589.068	321.681	590.271	313.882	572.069	322.553	590.182	331.423	596.268	316.61	585.928	312.967	573.776	296.156	585.97	300.704	581.966	310.002	576.35	309.361	570.017	323.553	594.083	315.117	574.983	310.583	577.119	299.241	577.94	301.769	589.914	309.734	581.565	317.065	585.358	305.468	574.955
310.258	571.809	325.732	589.985	317.807	581.306	330.047	592.405	319.503	582.105	314.706	581.941	317.944	588.568	321.014	590.253	313.262	572.02	321.89	590.18	330.786	596.268	316.126	585.754	312.904	573.176	296.772	586.046	300.981	582.358	309.99	575.682	308.685	570.121	323	593.87	315.065	574.368	310.223	576.787	298.768	578.385	301.241	590.128	309.045	581.52	316.598	585.087	304.811	575.104
309.919	571.504	325.104	590.04	317.475	581.006	329.672	592.123	319.182	581.74	314.044	582.011	317.684	588.23	320.353	590.156	313.061	571.572	321.347	589.986	330.28	596.035	315.851	585.37	312.474	572.939	297.403	586.032	301.026	582.954	309.922	575.094	308.129	569.857	322.962	593.253	314.671	574.086	310.017	576.311	298.447	578.946	300.753	590.401	308.354	581.498	316.009	584.991	304.159	575.276
309.795	570.947	324.976	590.569	316.827	581.121	329.18	591.971	318.98	581.259	313.427	581.961	317.377	587.909	320.018	589.67	312.906	571.051	320.917	589.613	330	595.524	315.601	584.953	311.951	572.795	297.929	586.105	301.642	582.99	309.298	575.026	307.791	569.39	322.56	592.988	314.123	573.949	309.569	575.959	298.274	579.605	300.606	591.067	307.662	581.508	315.319	585.08	303.514	575.471
309.35	571.016	324.777	591.082	316.274	580.945	329.075	591.419	319.064	580.6	312.968	581.735	316.989	587.589	319.889	589.085	312.296	570.861	320.724	589.197	329.679	595.201	315.088	584.774	311.915	572.178	297.97	586.704	301.985	583.325	309.071	574.576	307.713	568.718	322.015	592.861	314.021	573.348	309.227	576.114	298.229	580.286	300.866	591.657	306.972	581.543	315.106	584.567	302.898	575.746
308.948	571.315	324.184	591.335	315.838	580.582	328.704	591.13	318.791	580.181	312.976	581.078	317.034	586.977	320.006	588.425	311.64	570.832	320.416	588.871	329.354	594.879	314.982	584.25	311.501	571.943	298.374	586.931	302.075	583.937	308.868	574.086	307.776	568.036	322.002	592.216	314.016	572.698	308.944	576.601	298.247	580.965	301.336	592.047	306.283	581.596	314.757	584.218	302.306	576.063
308.877	571.882	323.538	591.39	315.766	579.934	328.199	590.974	318.302	579.949	312.941	580.449	316.977	586.404	319.623	588.153	310.969	570.872	319.994	588.634	329.029	594.531	314.988	583.617	310.979	571.817	298.909	587.026	301.987	584.585	308.256	573.942	307.863	567.357	321.994	591.562	313.938	572.134	308.561	576.892	298.328	581.64	302	592.189	305.596	581.669	314.318	583.979	301.737	576.418
308.414	572.046	322.891	591.337	315.775	579.281	328.099	590.439	317.647	580.057	312.753	579.97	316.646	585.967	319.276	587.837	310.299	570.944	319.765	588.171	328.699	594.196	314.795	583.095	310.939	571.202	298.962	587.631	301.948	585.232	307.583	573.987	307.969	566.679	321.885	591.006	313.344	572.028	308.231	577.252	298.536	582.288	302.693	592.117	304.916	581.797	314.09	583.506	301.226	576.85
307.776	572.024	322.274	591.142	315.831	578.626	327.764	590.025	317.197	579.814	312.13	579.928	316.039	585.967	319.033	587.416	309.629	571.012	319.324	587.973	328.365	593.865	314.344	582.86	310.499	570.996	298.976	588.255	301.967	585.878	306.895	574.049	308.092	566.005	321.231	591.006	313.116	571.599	307.909	577.623	298.94	582.775	303.383	592.025	304.245	581.958	313.707	583.193	300.78	577.346
307.141	571.951	322.08	590.625	315.915	577.973	327.246	589.724	316.92	579.351	311.996	579.428	315.467	585.928	318.629	587.157	308.959	571.059	318.666	588.047	328.026	593.537	313.945	582.604	309.848	570.999	298.985	588.87	302.537	585.957	306.206	574.066	308.213	565.331	321.016	590.566	312.933	571.068	307.539	577.939	299.482	583.093	304.07	591.937	303.583	582.153	313.296	582.907	300.39	577.89
306.546	571.993	321.876	590.156	316.001	577.32	326.598	589.79	317.004	578.692	312.01	578.779	315.056	585.667	318.281	586.835	308.288	571.051	318.193	587.805	327.703	593.186	314.024	581.938	309.217	570.953	299.558	588.996	302.913	586.221	306.072	573.497	308.334	564.656	320.898	590.028	312.461	570.607	307.193	578.292	300.155	583.042	304.746	591.987	302.952	582.43	313.038	582.46	300.108	578.5
305.984	572.124	321.319	590.06	316.083	576.667	326.211	590.113	316.79	578.272	311.962	578.149	314.799	585.237	318.012	586.425	308.098	570.581	317.864	587.454	327.374	592.855	313.914	581.362	308.979	570.526	300.167	589.02	302.948	586.818	305.743	573.142	308.45	563.98	320.246	590.015	311.864	570.315	307.014	578.776	300.678	583.176	304.976	592.457	302.372	582.789	313.095	581.824	299.91	579.141
305.927	572.699	321.105	589.615	316.129	576.011	326.036	590.647	316.411	577.973	311.479	577.975	314.441	584.943	317.619	586.177	307.899	570.045	317.689	586.991	327.031	592.552	313.646	580.927	308.867	569.981	300.812	588.944	303.484	586.962	305.157	573.064	308.557	563.303	320.027	589.568	311.222	570.096	307.102	579.462	301.077	583.444	305.166	592.951	301.855	583.228	313.17	581.141	299.775	579.8
305.619	573.038	320.892	589.168	316.003	575.429	325.639	591.073	316.028	577.617	311.004	577.796	313.787	585.028	317.237	585.854	307.407	569.625	317.222	586.793	326.745	592.096	313.102	580.816	308.219	569.979	300.922	589.492	304.104	587.004	304.481	573.075	308.654	562.625	319.87	589.054	310.562	569.935	306.785	580.016	301.288	583.89	305.816	592.965	301.5	583.811	313.137	580.454	299.733	580.474
304.994	573.078	320.35	589.055	315.738	574.928	325.113	591.339	315.932	577.066	310.968	577.171	313.133	585.103	316.872	585.445	306.783	569.417	316.884	586.474	326.419	591.979	312.883	580.376	308.03	569.56	301.209	589.85	304.749	586.972	304.034	572.74	308.733	561.944	319.234	589.007	309.892	569.818	306.282	580.369	301.752	584.152	306.073	593.498	301.376	584.464	312.788	579.88	299.764	581.146
304.36	573.017	320.129	588.629	315.224	574.824	324.466	591.456	316	576.405	310.469	576.975	312.518	585.073	316.91	584.776	306.125	569.281	316.701	586.009	326.032	592.34	312.643	579.951	308.08	568.909	301.748	589.933	304.937	587.438	303.792	572.155	308.795	561.262	318.581	589	309.22	569.723	305.616	580.513	302.115	584.52	306.165	594.163	301.432	585.126	312.304	579.422	299.848	581.813
303.724	572.944	319.924	588.176	314.923	574.471	323.807	591.464	316.091	575.746	309.821	576.954	312.005	584.782	316.972	584.107	305.457	569.201	316.207	585.815	325.819	592.877	312.078	579.839	308.004	568.268	302.016	590.424	305.159	587.861	303.83	571.465	308.84	560.579	318.065	588.862	308.544	569.652	304.932	580.421	302.138	585.2	306.13	594.858	301.732	585.726	311.702	579.086	300.007	582.468
303.088	572.878	319.383	588.011	314.79	573.918	323.155	591.406	316.143	575.084	309.158	577.044	311.917	584.213	317.056	583.44	304.785	569.171	315.96	585.414	325.427	593.249	311.993	579.296	307.68	567.745	302.156	591.002	305.711	587.915	303.909	570.777	308.859	559.893	318.019	588.244	307.866	569.61	304.354	580.132	302.081	585.88	306.055	595.55	302.316	585.915	311.033	578.895	300.273	583.082
302.477	572.958	318.76	588.013	314.135	573.961	322.511	591.279	316.116	574.452	308.507	577.023	311.912	583.6	317.095	582.77	304.113	569.171	316.019	584.756	324.777	593.385	311.99	578.655	307.193	567.318	302.124	591.651	306.118	588.323	303.993	570.091	308.827	559.21	317.55	588.057	307.187	569.588	303.938	579.673	302.008	586.559	305.976	596.243	302.781	586.161	310.352	578.762	300.638	583.608
301.987	573.178	318.211	587.958	313.482	574.026	322.142	590.829	315.712	574.031	308.029	576.811	311.771	583.111	316.888	582.286	303.441	569.207	315.839	584.252	324.114	593.359	311.862	578.07	306.575	567.076	302.057	592.298	306.429	588.868	304.045	569.403	308.763	558.529	317.081	587.868	306.507	569.586	303.975	578.994	301.926	587.238	305.898	596.935	302.925	586.674	309.663	578.678	301.176	583.938
301.975	573.791	318.069	587.424	312.83	574.114	321.835	590.408	315.15	573.95	308.001	576.182	311.306	582.89	316.471	581.964	302.776	569.309	315.489	583.913	323.513	593.19	311.37	577.892	305.934	566.92	301.981	592.944	306.575	589.504	303.624	569.141	308.663	557.853	317.019	587.254	305.829	569.636	303.939	578.325	301.88	587.92	305.843	597.63	303.419	586.923	308.968	578.65	301.696	584.141
301.578	574.016	317.679	587.153	312.258	573.943	321.592	590.032	314.522	574.017	307.503	576.027	310.821	582.652	316.104	581.645	302.126	569.468	314.942	583.772	322.994	592.853	310.945	577.651	305.277	566.829	301.899	593.59	306.662	590.151	303.148	568.861	308.491	557.191	317.03	586.605	305.155	569.713	303.709	577.793	301.984	588.529	305.88	598.314	304.02	587.005	308.274	578.666	302.054	584.465
300.994	574.055	317.243	586.936	311.97	573.55	321.207	589.748	314.076	573.718	307.045	575.833	310.668	582.021	315.993	581.129	301.497	569.701	314.912	583.142	322.888	592.305	310.87	577.044	304.614	566.838	301.826	594.236	306.716	590.802	302.743	568.407	308.252	556.554	316.881	586.103	304.484	569.817	303.068	577.588	302.253	589.053	306.078	598.87	304.693	586.942	307.581	578.715	302.059	585.137
300.995	574.686	317.091	586.441	312.008	572.906	320.873	589.417	313.954	573.194	307.03	575.196	310.641	581.371	316.044	580.487	301.006	570.135	314.948	582.482	322.588	591.949	310.312	576.981	303.96	566.929	301.764	594.884	306.728	591.456	302.664	567.734	307.942	555.943	316.275	585.995	303.829	569.991	302.44	577.785	302.805	589.174	306.686	598.967	304.915	587.453	306.893	578.807	302.008	585.809
300.99	575.307	316.708	586.134	311.939	572.293	320.622	589.015	314.03	572.535	306.524	575.042	310.715	580.729	315.677	580.137	300.693	570.671	315.028	581.823	322.007	591.856	309.668	576.99	303.321	567.089	301.733	595.533	306.711	592.11	302.692	567.05	307.507	555.417	315.625	586.013	303.198	570.226	301.935	578.188	303.018	589.605	306.902	599.437	305.27	587.776	306.215	578.958	301.943	586.48
300.978	575.919	316.188	585.967	311.619	571.941	320.239	588.758	314.107	571.875	306.058	574.844	310.992	580.152	315.296	579.812	300.601	571.316	315.089	581.163	321.901	591.289	309.067	576.897	302.739	567.398	301.781	596.177	306.671	592.762	302.828	566.39	307.023	554.942	315.122	585.868	302.597	570.526	301.604	578.786	302.958	590.283	307.169	599.855	305.716	587.998	305.552	579.157	301.873	587.151
300.415	575.996	315.532	586.049	310.972	571.937	319.903	588.433	313.946	571.319	306.016	574.215	311.514	579.963	314.954	579.468	300.985	571.775	315.036	580.55	321.592	590.93	308.926	576.379	302.258	567.825	301.927	596.767	306.583	593.41	303.335	566.104	306.492	554.515	314.968	585.295	302.119	570.992	301.473	579.463	302.877	590.962	307.751	599.967	306.14	588.441	304.905	579.409	301.816	587.823
300.03	576.249	315.179	585.753	310.361	571.923	319.661	587.981	313.596	570.889	305.556	573.872	312.079	579.854	315.037	578.801	301.488	572.058	314.826	580.002	320.992	590.869	308.683	575.966	301.862	568.34	302.452	597.044	306.439	594.045	303.877	565.831	305.906	554.166	315.003	584.645	301.793	571.556	301.423	580.15	302.99	591.58	307.909	600.494	306.255	589.049	304.334	579.795	301.782	588.496
299.995	576.847	314.951	585.298	309.976	571.672	319.057	588.002	312.939	570.93	304.966	573.719	312.276	579.231	314.86	578.302	302.095	572.147	314.298	579.875	320.906	590.297	308.077	575.91	301.655	568.965	303.044	597.076	306.236	594.65	304.392	565.504	305.292	553.867	314.864	584.164	301.596	572.191	301.458	580.838	303.29	592.062	308.237	600.86	306.113	589.642	303.859	580.277	301.781	589.169
299.497	576.985	314.502	585.105	309.939	571.05	318.478	587.96	312.414	570.841	304.324	573.837	312.349	578.586	314.52	577.924	302.289	572.778	313.999	579.556	320.606	589.942	307.944	575.382	301.54	569.611	303.655	596.984	305.713	594.929	304.655	564.868	304.657	553.612	314.302	584.047	301.59	572.867	301.682	581.488	303.956	592.043	308.788	601.012	305.608	589.954	303.492	580.85	302.027	589.744
298.887	577.004	314.207	584.747	309.474	570.648	318.029	587.695	312.003	570.624	304.11	574.336	312.329	577.932	314.154	577.668	302.408	573.435	314.074	578.901	320.012	589.885	307.689	574.975	301.492	570.272	303.909	597.417	305.308	595.219	304.824	564.201	303.994	553.438	314.112	583.567	301.661	573.54	302.146	581.851	304.583	592.085	308.88	601.567	305.134	590.257	303.363	581.525	302.416	590.106
298.258	576.977	313.974	584.322	308.909	570.342	317.792	587.277	311.837	570.039	303.876	574.793	312.143	577.308	313.843	577.283	302.461	574.105	313.956	578.289	319.929	589.308	307.079	574.92	301.519	570.936	303.985	597.962	305.006	595.519	304.934	563.518	303.324	553.303	313.837	583.183	301.78	574.208	302.667	582.1	305.058	592.284	309.234	602.033	304.972	590.581	303.466	582.184	302.97	590.182
298.044	577.389	313.531	584.112	308.278	570.154	317.507	586.913	311.401	569.659	303.363	574.944	311.678	577.066	313.501	576.907	302.408	574.775	313.613	577.936	319.598	588.989	306.953	574.378	301.577	571.597	303.905	598.606	304.667	595.806	304.986	562.828	302.648	553.194	313.293	583.083	301.934	574.87	302.895	582.52	305.114	592.892	309.785	602.399	305.372	590.95	303.774	582.741	303.108	590.726
297.944	577.925	312.96	584.078	307.633	570.026	317.05	586.707	310.784	569.425	302.727	574.932	311.098	576.992	312.832	576.963	302.247	575.413	312.954	577.974	318.941	589.012	306.67	574.001	301.657	572.257	304.336	598.948	304.258	596.103	304.973	562.137	301.968	553.119	313.037	582.587	301.962	575.51	303.296	582.839	305.63	593.063	310.462	602.556	305.911	591.203	304.381	582.995	303.466	591.026
297.346	577.974	312.332	584.103	306.983	569.928	316.813	586.291	310.133	569.289	302.197	575.065	310.979	576.378	312.163	577.033	301.972	576	312.352	577.928	318.313	588.951	306.018	574.008	301.762	572.914	304.866	599.089	303.772	596.411	304.914	561.448	301.283	553.096	312.937	581.989	301.787	575.997	303.825	583.001	306.051	593.291	311.151	602.648	306.291	591.638	305.05	582.946	304.133	590.98
297.057	578.326	311.948	583.637	306.327	569.871	316.538	585.914	309.476	569.184	301.954	575.595	310.974	575.739	311.536	577.039	301.316	575.993	311.963	577.664	317.962	588.625	305.372	573.971	301.872	573.57	305.51	598.994	303.637	597.034	304.801	560.765	300.599	553.102	313.017	581.322	301.148	576.043	304.511	582.902	306.003	593.899	311.845	602.699	306.466	592.302	305.673	583.001	304.738	591.087
297.006	578.911	311.773	583.058	305.669	569.864	316.065	585.732	308.816	569.104	301.998	576.232	311.047	575.083	311.086	576.734	301.048	576.353	311.906	577.065	317.936	587.993	304.98	573.688	301.983	574.226	305.8	599.324	303.603	597.677	304.581	560.108	299.915	553.139	313.053	580.654	300.983	576.553	304.898	583.299	305.431	593.995	312.541	602.713	306.49	592.992	306.189	583.371	305.08	591.43
296.423	578.973	311.752	582.4	305.012	569.887	315.827	585.323	308.152	569.058	301.912	576.746	311.115	574.426	310.809	576.331	301.09	577.014	311.362	576.94	317.322	587.954	304.967	573.041	302.071	574.885	306.082	599.736	303.679	598.324	304.285	559.487	299.234	553.206	312.852	580.195	300.761	577.013	305.052	583.861	305.02	594.258	313.237	602.687	306.446	593.678	306.337	584.029	305.142	592.022
295.817	578.992	311.819	581.741	304.358	569.959	315.563	584.933	307.488	569.023	301.425	576.956	311.112	573.775	310.553	575.935	301.028	577.656	310.962	576.672	316.973	587.652	304.367	572.982	302.012	575.497	306.399	600.222	304.046	598.775	303.91	558.907	298.556	553.304	312.323	580.034	300.106	577.061	304.959	584.548	304.99	594.908	313.931	602.63	306.319	594.342	306.363	584.714	305.786	592.067
295.182	578.954	311.899	581.085	303.717	570.099	315.06	584.758	306.823	568.999	301.184	577.356	311.028	573.156	310.097	575.721	300.646	578.011	310.924	576.048	316.954	587.02	303.996	572.706	301.813	576.03	306.979	600.432	304.479	599.104	303.399	558.441	297.883	553.435	312.087	579.569	299.435	576.993	305.36	584.861	304.38	594.984	314.621	602.542	305.946	594.875	306.274	585.392	306.209	592.414
295.055	579.468	311.989	580.429	303.094	570.294	315.004	584.22	306.158	568.99	300.906	577.751	310.456	573.045	309.827	575.32	300.025	578.134	310.378	575.944	316.347	586.97	304.029	572.047	301.215	576.095	307.613	600.553	304.967	599.258	302.825	558.063	297.222	553.612	312.001	579.002	298.768	576.953	305.725	585.205	303.719	595.001	315.291	602.357	305.37	595.008	305.871	585.871	306.42	593.044
294.839	579.893	312.073	579.772	302.514	570.596	315.019	583.599	305.493	569	300.451	578.057	310.139	572.714	309.569	574.916	299.359	578.041	310.009	575.696	315.994	586.661	304	571.393	301.015	576.506	308.263	600.589	304.978	599.825	302.204	557.763	296.568	553.813	312.077	578.334	298.112	576.998	306.007	585.609	303.054	595.005	315.768	601.977	304.705	594.986	305.334	586.122	306.418	593.715
294.276	579.955	312.119	579.114	302.07	571.052	314.81	583.077	304.828	569.024	299.821	578.051	310.036	572.194	309.123	574.725	298.692	577.987	310.101	575.042	315.951	586.036	303.75	570.87	301.08	577.157	308.911	600.56	304.985	600.432	301.539	557.57	295.922	554.037	311.597	578.117	298.01	577.575	305.9	586.294	303.018	595.644	316.09	601.462	304.063	595.087	304.859	586.311	306.285	594.357
293.888	580.353	312.118	578.466	301.738	571.594	314.278	582.988	304.164	569.065	299.157	577.987	309.539	571.845	308.865	574.27	298.1	578.037	310.026	574.423	315.34	585.975	303.22	570.517	300.977	577.788	309.556	600.49	305.203	600.946	300.857	557.461	295.297	554.32	311.232	577.801	297.719	577.923	306.148	586.809	302.657	595.949	316.384	601.073	303.72	595.597	305.066	586.878	306.016	594.938
293.605	580.887	311.708	578.113	301.637	572.24	313.648	583.009	303.501	569.119	298.492	577.927	308.961	571.649	308.545	573.864	298.047	578.651	309.747	573.95	314.996	585.651	302.589	570.64	300.558	578.11	310.188	600.345	305.624	601.153	300.169	557.411	294.698	554.648	311.034	577.345	297.082	577.874	306.629	587.129	302.052	596.02	316.952	601.003	303.527	596.242	305.624	587.094	305.375	594.99
293.528	581.521	311.347	577.794	301.64	572.893	313.093	582.843	302.839	569.185	298.183	578.297	308.306	571.601	307.875	573.834	297.646	578.92	309.135	573.743	314.965	585.019	302.114	570.992	299.912	578.195	310.741	600.052	306.017	601.387	299.477	557.436	294.123	555.018	310.581	577.145	296.42	577.939	307.318	587.073	301.773	596.611	317.561	600.968	303.466	596.929	306.309	587.139	304.726	594.989
293.515	582.157	311.031	577.506	301.704	573.546	312.955	582.339	302.182	569.286	297.887	578.713	307.663	571.732	307.205	573.87	297.038	578.965	308.48	573.727	314.335	585.005	301.834	571.586	299.253	578.107	311.143	599.673	306.146	601.965	298.795	557.544	293.595	555.451	310.218	576.821	295.884	578.23	308.006	586.987	301.737	597.249	317.92	600.608	303.509	597.617	307.001	587.077	304.103	595.011
293.549	582.794	310.699	577.103	301.829	574.192	312.968	581.707	301.531	569.42	297.494	579.066	307.226	572.053	306.535	573.931	296.374	578.857	307.818	573.764	313.69	585.002	301.786	572.249	298.596	578.005	310.951	599.172	306.611	602.31	298.127	557.71	293.125	555.941	309.956	576.361	295.487	578.759	308.599	587.05	301.931	597.829	318.211	600.101	303.662	598.274	307.692	586.99	303.735	595.546
293.713	583.405	310.205	576.943	301.955	574.838	312.854	581.156	300.889	569.588	296.868	579.069	307.017	572.583	305.866	574.005	295.714	578.88	307.158	573.835	313.046	584.996	301.791	572.917	297.94	577.894	310.517	598.948	307.216	602.535	297.476	557.941	292.707	556.476	310.034	575.695	295.305	579.41	309.021	587.4	302.551	597.948	318.641	599.719	303.935	598.894	308.382	586.912	303.54	596.163
294.064	583.799	309.549	577.024	302.03	575.456	312.431	580.915	300.293	569.87	296.203	579.002	306.664	573.014	305.196	574.063	295.089	579.033	306.499	573.919	313.006	584.374	301.845	573.585	297.28	577.808	309.988	598.839	307.86	602.644	296.879	558.287	292.38	557.074	309.836	575.232	295.184	580.075	309.287	587.791	302.838	598.342	319.322	599.59	304.575	598.96	309.075	586.849	303.467	596.831
294.599	583.975	308.892	577.101	301.731	575.873	311.941	580.74	299.96	570.317	295.539	578.92	306.173	573.251	304.567	574.029	294.616	579.481	305.84	574.001	312.688	584.028	301.932	574.25	296.619	577.768	309.925	598.25	308.51	602.708	296.342	558.709	292.15	557.713	309.387	574.959	295.122	580.75	309.673	588.116	303.07	598.774	320.011	599.649	304.903	599.32	309.714	586.996	303.495	597.503
294.883	584.364	308.343	576.966	301.375	576.174	311.94	580.085	299.877	570.854	294.874	578.884	305.517	573.252	304.025	573.802	294.338	580.063	305.181	574.073	312.065	583.987	302.02	574.914	295.958	577.773	309.56	597.959	309.163	602.745	295.87	559.209	291.99	558.375	309.178	574.575	295.139	581.428	310.183	588.369	303.601	598.93	320.594	599.888	305.034	599.865	310.023	587.419	303.618	598.159
295.022	584.854	307.91	576.603	300.995	576.421	311.998	579.431	300.497	570.912	294.327	579.023	305.161	572.819	303.884	573.244	294.177	580.71	304.522	574.057	311.963	583.369	302.109	575.579	295.323	577.943	308.966	597.894	309.817	602.74	295.565	559.827	291.919	559.054	308.873	574.138	295.21	582.101	309.845	588.849	303.854	599.359	321.049	600.3	305.638	599.951	310.134	587.996	303.859	598.732
294.95	585.49	307.997	575.959	300.757	576.905	312.087	578.777	300.957	571.222	293.987	579.455	304.852	572.394	303.625	572.776	294.14	581.38	304.059	573.84	311.956	582.726	302.131	576.247	294.772	578.263	308.936	597.288	310.47	602.706	295.383	560.485	291.955	559.735	308.473	573.671	295.334	582.767	309.41	589.144	304.125	599.768	321.191	600.843	305.874	600.368	310.792	588.038	304.425	598.958
294.911	586.127	307.925	575.393	300.283	577.088	312.147	578.121	301.27	571.735	293.68	579.771	304.58	572.024	302.989	572.607	294.195	582.046	304.033	573.218	312.042	582.064	301.91	576.729	294.303	578.712	308.617	596.966	311.121	602.648	295.306	561.167	292.062	560.406	307.825	573.504	295.573	583.4	308.957	589.365	304.625	599.949	321.685	600.99	305.914	600.973	311.226	588.449	304.768	599.289
294.997	586.672	307.648	574.93	299.628	577.039	312.061	577.505	301.223	572.394	293.305	580.076	304.224	571.733	302.389	572.817	294.32	582.703	303.566	572.977	312.032	581.403	301.456	577.032	294.106	579.341	307.991	596.948	311.764	602.529	295.372	561.853	292.254	561.061	307.165	573.394	296.018	583.841	308.779	589.898	304.858	600.394	322.376	600.917	305.927	601.645	311.496	589.061	305.048	599.646
295.437	586.939	307.011	574.969	298.974	576.957	311.838	576.971	300.899	572.795	292.81	580.39	303.919	571.341	301.964	573.229	294.555	583.33	303.134	573.053	311.716	581.059	301.174	577.374	294.036	579.987	307.777	596.376	312.366	602.316	295.632	562.466	292.641	561.605	306.496	573.333	296.591	584.099	308.241	589.985	305.159	600.777	323.067	600.838	306.316	602.141	311.587	589.749	305.462	599.925
295.753	587.262	306.446	574.905	298.426	577.057	311.197	576.977	300.37	573.003	292.724	581.004	303.71	570.779	301.826	573.876	294.965	583.839	303.045	573.661	311.089	581.037	300.842	577.721	294.078	580.643	307.737	595.772	312.924	602.019	296.056	562.896	293.161	561.915	305.824	573.33	297.258	584.001	307.574	589.967	305.651	600.984	323.685	601.014	306.871	602.497	311.571	590.44	305.761	600.28
296.025	587.601	305.998	574.673	297.973	577.322	310.572	576.959	300.092	573.415	292.863	581.573	303.13	570.625	301.86	574.542	295.478	584.219	302.603	573.865	310.988	580.417	300.455	578.056	294.338	581.249	307.913	595.168	312.968	601.409	296.713	562.952	293.814	561.971	305.153	573.364	297.745	584.193	306.958	590.161	305.819	601.432	324.075	601.412	307.537	602.674	311.449	591.11	305.933	600.733
296.392	587.872	305.812	574.15	297.798	577.827	309.997	576.886	300.022	573.963	293.275	582.002	302.545	570.698	301.936	575.209	296.12	584.354	302.159	574.089	310.982	579.776	299.79	577.972	294.75	581.729	308.472	595.052	313.282	601.075	296.901	563.456	293.904	562.544	304.486	573.434	298.04	584.589	306.727	590.737	306.109	601.89	324.06	602.094	308.223	602.749	311.189	591.742	305.846	601.398
296.71	588.19	305.506	573.941	297.388	578.077	309.972	576.252	300.116	574.621	293.71	582.205	302.042	571.07	302.04	575.874	296.661	584.11	301.953	574.636	311.069	579.114	299.291	578.137	295.291	582.095	308.897	594.825	313.875	601.026	297.197	563.846	294.26	562.892	303.836	573.595	297.965	585.264	306.745	591.365	306.575	602.335	324.116	602.697	308.913	602.776	310.604	592.015	306.132	601.941
296.99	588.542	305.004	574.199	296.733	578.062	310.02	575.608	300.135	575.282	294.054	582.518	301.82	571.66	302.052	576.541	297.032	583.677	301.973	575.269	311.049	578.46	298.935	578.508	295.937	582.229	308.953	594.244	314.042	600.458	297.768	563.955	294.843	563.033	303.312	573.924	298.187	585.729	307.034	591.95	307.235	602.509	324.443	603.049	309.604	602.761	309.957	592.082	306.597	602.372
297.34	588.83	304.851	574.703	296.08	577.98	310.12	574.957	299.899	575.779	294.252	583.047	301.7	572.299	301.781	576.937	297.073	583.042	302.059	575.927	310.74	578.094	298.646	578.803	296.592	582.284	309.424	594	314.097	599.843	297.96	564.502	295.524	562.964	302.905	574.361	298.545	586.085	307.662	592.026	307.905	602.635	325.051	603.144	310.289	602.669	309.299	591.997	307.221	602.614
297.663	589.143	304.571	575.072	295.426	577.91	310.031	574.319	299.442	576.121	294.867	583.106	301.685	572.957	301.139	576.966	297.601	582.756	302.149	576.584	310.154	578.005	298.227	579.104	297.256	582.272	310.017	593.9	314.029	599.192	298.006	565.129	295.855	563.294	302.75	574.82	299.02	586.332	308.005	592.383	308.583	602.717	325.118	603.83	310.956	602.511	309.115	592.493	307.877	602.754
297.951	589.488	304.042	575.199	294.77	577.856	309.662	573.971	298.784	576.034	295.53	583.077	301.721	573.616	301.049	577.551	298.247	582.595	302.143	577.241	310.076	577.439	297.731	579.433	297.916	582.195	310.663	593.971	313.948	598.543	297.98	565.774	296.054	563.789	302.367	575.113	299.044	586.936	308.086	593.007	309.265	602.762	325.105	604.521	311.582	602.267	308.739	592.838	308.543	602.847
297.897	590.082	303.879	575.704	294.22	578.087	309.033	573.892	298.321	576.178	296.194	582.998	301.778	574.273	300.746	577.923	298.917	582.531	301.98	577.797	309.746	577.09	297.532	580.07	298.575	582.103	311.311	594.023	313.905	597.894	298.544	565.899	296.596	563.955	301.946	575.387	298.974	587.612	308.756	593.02	309.948	602.791	325.036	605.214	311.934	601.748	308.208	593.029	309.215	602.894
297.947	590.653	303.56	576.032	293.863	578.437	308.387	573.969	298.019	576.523	296.859	582.928	301.854	574.929	300.139	577.992	299.587	582.562	301.455	578.065	309.174	576.952	297.4	580.723	299.232	581.999	311.851	593.952	313.929	597.245	298.896	566.291	297.234	563.964	302.011	576.053	298.896	588.287	309.029	593.409	310.631	602.806	324.95	605.906	312.227	601.32	307.519	592.939	309.889	602.901
298.337	591.092	302.904	575.987	293.769	578.925	308.037	573.707	297.682	576.939	297.47	582.981	301.936	575.584	299.478	577.892	300.239	582.68	300.833	578.051	308.511	577.024	297.321	581.389	299.891	581.907	311.933	593.386	314.425	597.064	299.066	566.864	297.793	564.061	301.902	576.627	299.158	588.783	308.935	593.925	311.315	602.803	324.888	606.599	312.516	600.955	307.154	593.286	310.562	602.885
298.908	591.253	302.318	576.091	293.228	579.09	308	573.088	297.17	577.107	298.003	583.211	302.016	576.239	298.816	577.874	300.86	582.917	300.291	578.081	308.147	576.765	297.296	582.06	300.497	581.971	312.282	592.959	314.845	596.827	298.98	567.551	298.009	564.599	301.648	577.083	299.523	589.135	308.279	593.97	311.998	602.779	324.892	607.281	312.917	600.648	306.852	593.696	311.235	602.841
299.542	591.3	301.922	576.382	292.771	579.399	307.466	572.754	296.507	577.059	298.149	583.741	302.083	576.896	298.157	577.952	300.973	583.507	300.094	578.531	308.054	576.201	297.296	582.73	301.042	582.183	312.79	592.636	314.931	596.293	298.938	568.238	297.982	565.248	301.127	577.213	299.971	589.321	308.076	594.444	312.681	602.741	325.037	607.935	313.224	600.253	306.433	593.898	311.903	602.752
300.181	591.263	301.854	576.972	292.537	580.01	306.87	572.533	295.847	576.976	298.49	584.054	302.02	577.528	297.705	578.417	301.232	583.911	299.713	578.848	307.496	575.986	297.32	583.4	301.12	582.742	313.433	592.548	315.347	595.902	299.081	568.776	298.095	565.785	300.871	577.629	300.192	589.822	307.858	594.923	313.362	602.679	325.624	608.037	313.531	599.883	305.957	594.281	312.563	602.625
300.818	591.205	301.289	577.013	292.413	580.653	306.218	572.436	295.186	576.91	299.155	584.022	301.789	578.007	297.394	578.974	301.826	583.953	299.217	579.037	306.883	575.918	297.386	584.067	301.466	583.052	314.08	592.52	315.89	595.629	299.615	568.968	298.609	566.045	300.621	578.039	300.624	590.074	307.231	595.055	314.039	602.591	325.976	608.334	313.903	599.63	305.608	594.803	313.212	602.448
301.454	591.132	300.657	577.009	292.328	581.304	305.559	572.418	294.53	576.871	299.819	583.948	301.166	578.033	297.223	579.618	302.201	584.457	298.558	578.962	306.219	575.986	297.498	584.726	302.037	583.154	314.729	592.542	316.539	595.58	299.858	569.405	299.266	565.986	299.956	577.949	301.298	590.039	306.555	594.974	314.711	602.472	325.911	609.022	314.171	599.107	305.439	595.476	313.748	602.084
302.088	591.049	300.078	577.115	292.286	581.961	304.902	572.44	294.136	577.248	300.439	583.981	300.853	578.478	297.233	580.288	302.454	585.054	298.205	579.263	305.556	576.067	297.668	585.361	302.048	583.808	315.354	592.703	317.176	595.67	300.175	569.769	299.757	566.131	299.329	578.039	301.972	589.951	305.87	594.862	315.372	602.305	325.995	609.673	314.59	598.688	305.371	596.167	314.071	601.609
302.723	590.97	299.923	577.616	292.282	582.619	304.247	572.507	293.819	577.627	301.001	584.165	300.73	579.085	297.361	580.933	302.57	585.717	297.93	579.676	304.893	576.095	298.054	585.856	302.007	584.464	315.778	593.047	317.723	595.891	300.664	569.973	299.99	566.62	298.816	578.307	302.567	590.039	305.185	594.754	315.802	601.892	326.395	610.034	315.242	598.476	305.341	596.861	314.12	601.009
303.359	590.895	299.676	578.003	292.302	583.276	303.619	572.693	293.569	578.005	301.119	584.705	300.878	579.715	297.605	581.546	302.612	586.388	297.522	579.979	304.243	576.059	298.554	586.093	301.921	585.123	316.009	593.568	317.949	596.424	300.892	570.446	300.415	566.838	298.63	578.93	303.067	590.297	304.493	594.714	316.115	601.4	327.052	610.135	315.926	598.379	305.348	597.556	314.754	600.999
303.997	590.865	299.024	577.947	292.354	583.932	303.172	573.039	293.171	578.283	301.421	585.065	301.359	579.924	298.119	581.948	302.623	587.061	296.937	579.994	304.005	575.539	299.037	586.265	302.033	585.748	316.369	593.86	318.275	596.758	301.244	570.774	300.8	567.168	298.782	579.522	303.199	590.827	303.809	594.766	316.309	600.856	327.742	610.037	316.614	598.316	305.412	598.247	315.402	600.973
304.553	590.971	298.403	578.019	292.459	584.58	302.994	573.611	292.844	578.622	302.008	585.154	301.895	580.057	298.718	582.13	302.604	587.734	296.28	579.908	303.95	574.946	299.031	586.929	302.408	586.06	316.857	593.987	318.633	597.023	301.708	570.989	301.122	567.629	299.147	579.965	303.654	590.985	303.153	594.932	316.92	600.631	328.428	610.003	317.305	598.283	305.543	598.928	316.022	600.885
304.971	591.302	297.969	578.278	292.617	585.212	302.591	573.832	292.577	579.009	302.113	585.714	302.056	580.646	299.384	582.129	302.523	588.401	295.621	579.87	304.04	574.294	298.979	587.595	303.018	586.087	317.502	593.91	318.898	597.428	302.139	571.43	301.069	568.312	299.8	580.009	304.318	590.927	302.703	595.441	317.584	600.487	328.949	610.161	317.996	598.297	305.777	599.547	316.071	600.265
305.209	591.719	297.972	578.921	292.886	585.802	302.235	574.117	291.923	578.901	302.411	586.076	302.069	581.281	300.046	582.01	302.385	589.056	295.161	580.167	303.66	573.796	298.906	588.261	303.048	586.712	317.834	594.276	318.936	597.982	302.272	572.029	301.006	568.993	300.448	580	304.93	591.114	302.431	596.051	318.262	600.401	328.982	610.807	318.686	598.343	306.239	599.994	316.377	599.796
305.512	592.032	297.962	579.549	293.427	585.957	302.011	574.595	291.322	579.001	302.996	586.147	302.008	581.938	300.6	582.096	302.188	589.696	294.876	580.649	303.134	573.575	298.854	588.93	303.398	587.007	318.143	594.638	318.884	598.605	302.144	572.637	300.999	569.62	300.934	580.16	305.242	591.596	302.294	596.721	318.945	600.366	329.512	611.009	319.372	598.419	306.701	600.213	316.964	599.498
306.147	591.96	297.784	580.013	293.927	586.101	302.044	575.221	290.775	579.301	303.095	586.717	301.933	582.594	301.048	582.351	301.642	589.917	294.961	581.306	302.488	573.611	298.968	589.551	304.054	586.991	318.478	594.907	319.312	599.015	301.627	572.929	301.427	569.867	301.011	580.782	305.32	592.225	302.308	597.413	319.628	600.353	330.174	611.038	320.05	598.553	307.061	600.532	317.625	599.371
306.662	592.107	297.162	580.037	293.965	586.728	301.937	575.752	290.533	579.913	303.432	587.026	301.872	583.251	301.228	582.821	301.186	590.213	294.764	581.72	302.073	574.1	299.237	590.052	304.682	587.036	318.84	595.253	319.866	599.194	301.204	573.25	301.905	570.186	300.993	581.44	305.05	592.813	302.476	598.077	320.312	600.362	330.865	610.952	320.635	598.862	307.245	601.121	318.292	599.286
307.086	592.378	296.983	580.513	293.911	587.372	301.466	576.045	290.378	580.549	304.095	586.981	301.833	583.909	301.62	583.114	300.838	590.581	294.406	582.023	301.822	574.677	299.839	590.104	305.008	587.378	319.083	595.699	320.519	599.192	300.958	573.693	302.342	570.604	301.157	581.911	304.505	592.997	302.791	598.638	320.993	600.415	331.557	610.943	321.04	599.308	307.751	600.926	318.964	599.242
307.248	592.819	296.797	580.972	293.851	588.022	300.845	576.026	290.309	581.21	304.698	587.067	301.884	584.563	302.076	583.353	301.308	590.879	293.895	582.314	301.716	575.331	300.062	590.552	305.041	588.009	319.017	596.345	321.168	599.116	301.031	574.381	302.518	571.265	301.776	581.947	304.008	593.174	303.313	599.004	321.668	600.511	331.916	611.273	321.091	599.938	308.069	600.496	319.637	599.265
307.621	593.102	296.157	580.943	293.926	588.664	300.321	576.095	290.338	581.875	305.05	587.395	302.257	584.89	302.045	584.02	301.685	591.198	293.662	582.85	301.738	575.998	300.234	591.048	305.677	588.018	318.947	596.991	321.817	599.033	301.088	575.07	302.624	571.94	301.988	582.458	304.005	593.837	303.755	599.244	322.321	600.668	331.999	611.882	321.68	600.011	308.199	599.914	320.305	599.338
308.161	593.259	295.521	580.976	294.342	588.974	300.092	576.514	290.417	582.532	305.109	588.005	302.785	585.051	301.979	584.687	301.987	591.536	293.589	583.503	301.787	576.663	300.899	591.009	306.15	588.307	318.973	597.574	322.465	598.943	300.955	575.637	302.693	572.621	302.041	583.089	303.5	593.995	304.106	599.574	322.859	601.032	332.637	611.973	322.366	599.965	308.89	599.865	320.964	599.462
307.938	593.758	295.007	581.159	294.938	589.084	299.722	576.883	290.548	583.182	305.719	588.066	302.889	585.566	301.939	585.335	302.341	591.907	293.648	584.162	301.862	577.326	301.53	591.036	306.46	588.877	319.349	597.927	323.117	598.89	300.568	576.039	302.724	573.306	301.952	583.755	302.945	594.177	304.357	600.032	323.081	601.551	333.307	611.987	323.053	599.887	309.583	599.87	321.574	599.734
307.586	594.083	294.903	581.78	295.588	588.986	299.246	577.126	290.882	583.735	306.142	588.375	303.252	585.881	302.158	585.879	302.874	592.016	293.939	584.686	301.953	577.988	302.022	591.214	306.596	589.526	319.692	598.228	323.644	599.032	300.193	576.315	302.712	573.991	301.943	584.417	302.621	594.758	304.82	600.249	323.267	602.035	333.872	612.089	323.698	600	310.277	599.915	321.953	600.201
307.069	594.178	294.941	582.425	295.881	589.31	298.588	577.076	291.363	584.021	306.323	588.993	303.807	586.038	302.585	586.137	303.516	591.968	294.36	585.092	302.03	578.651	302.057	591.837	306.695	590.182	320.018	598.522	324.018	599.413	299.855	576.678	302.672	574.674	302.159	584.874	302.466	595.412	305.143	600.614	323.893	602.106	333.963	612.696	324.025	600.389	310.97	599.979	322.137	600.808
306.911	594.673	295.019	583.08	296.018	589.829	297.933	577.003	291.992	584.035	306.14	589.612	304.461	585.975	303.047	586.326	303.893	592.325	294.847	585.232	302.08	579.306	302.545	591.996	306.756	590.844	320.326	598.918	324.285	599.774	299.511	577.068	302.6	575.356	302.744	584.972	302.374	596.084	305.389	601.06	324.088	602.584	334.436	612.91	324.09	600.995	311.663	600.043	322.019	601.47
306.645	595.066	295.037	583.737	296.58	589.937	297.277	576.933	291.968	584.688	305.735	589.953	304.839	586.235	303.181	586.862	304.212	592.681	294.955	585.709	301.846	579.813	303.198	591.995	306.765	591.508	320.839	599.026	324.593	600.106	298.825	576.984	302.455	576.025	302.898	585.469	302.334	596.762	305.844	601.268	324.304	603.039	334.858	613.171	324.738	601.035	312.356	600.097	322.288	601.817
306.012	595.096	294.601	583.95	296.873	590.299	296.619	576.891	291.982	585.333	305.099	589.988	305.01	586.74	303.598	587.113	304.517	593.026	294.905	586.357	301.417	580.1	303.828	592.049	306.748	592.172	321.465	598.973	324.979	600.395	298.313	577.156	302.171	576.607	303.17	585.884	302.346	597.442	306.135	601.702	324.937	603.09	334.952	613.759	325.015	601.45	313.051	600.131	322.734	602.032
305.378	595.043	294.075	584.08	297.01	590.815	296.227	577.192	292.04	585.962	305.085	590.586	305.495	586.891	304.055	587.322	305.014	593.295	295.11	586.955	300.86	580.243	304.023	592.529	306.706	592.836	321.839	599.279	325.254	600.731	297.929	577.495	301.73	577.087	303.729	586.077	302.395	598.119	306.466	602.113	325.055	603.657	335.49	613.93	325.166	601.991	313.683	599.976	322.917	602.529
304.743	594.964	294.026	584.703	297.507	591.053	295.924	577.606	292.654	586.014	305.068	591.215	306.067	586.942	304.171	587.863	304.971	593.668	295.561	587.344	300.752	580.888	304.215	593.007	306.596	593.491	322.15	599.643	325.584	601.052	297.678	577.957	301.244	577.211	304.385	586.024	302.485	598.792	307.157	602.125	325.028	604.335	336.124	613.971	325.805	602.035	314.056	599.594	323.295	602.803
304.107	594.899	293.604	584.948	297.821	590.855	295.593	577.97	292.992	586.338	305.033	591.865	306.715	586.909	304.617	588.094	304.6	594.066	296.158	587.577	300.856	581.488	304.85	593.039	306.424	594.126	322.405	600.057	326.057	601.326	297.093	577.999	300.926	577.571	305.053	585.962	302.709	599.427	307.847	602.067	324.938	605.013	336.796	613.935	326.082	602.519	314.097	598.949	323.738	603.025
303.511	594.97	293.075	585.088	297.997	590.319	295.035	578.028	293.026	586.963	304.521	592.248	307.15	587.357	305.064	588.332	304.143	594.258	296.816	587.562	301.146	582.018	305.152	593.509	306.185	594.742	323.05	599.981	326.175	601.903	296.478	578.033	300.713	578.09	305.722	585.929	303.108	599.844	308.537	601.995	325.02	605.646	336.992	614.523	326.172	603.18	314.734	598.731	324.04	603.507
302.968	595.151	292.929	585.638	298.45	590.115	294.379	577.959	293.648	586.995	303.931	592.461	307.406	587.907	305.081	588.994	303.852	594.635	297.411	587.356	301.765	582.063	305.254	594.125	305.626	594.982	323.594	600.07	326.185	602.554	296.012	578.323	300.03	578.07	305.895	586.439	303.686	600.026	309.227	601.929	325.35	606.021	337.022	615.171	326.131	603.87	315.404	598.633	324.095	604.123
302.918	595.731	293.269	585.888	298.762	589.788	293.723	577.907	294.292	586.997	303.268	592.503	307.479	588.56	305.024	589.66	303.597	595.057	297.922	587	302.04	582.456	305.097	594.761	305.021	595.042	324.019	600.355	326.137	603.207	295.769	578.762	299.35	578.008	306.197	586.831	303.87	600.473	309.769	602.141	325.977	606.07	337.039	615.776	326.063	604.558	316.091	598.657	324.038	604.794
302.592	596.043	293.801	586.04	298.944	589.345	293.253	578.144	294.947	586.979	302.631	592.332	307.372	589.206	304.995	590.309	303.112	595.249	298.099	586.381	302.046	583.116	304.575	594.936	304.37	594.912	324.241	600.749	326.073	603.858	295.352	578.973	298.69	577.964	306.717	587.016	304.215	600.799	310.098	602.555	325.918	606.716	337.583	615.941	325.988	605.246	316.729	598.893	323.953	605.463
301.985	596.078	293.923	586.576	299.356	588.932	292.893	578.513	294.973	587.606	302.177	591.968	307.08	589.691	305.116	590.904	302.84	595.636	298.112	585.738	301.967	583.779	304.039	595.125	303.909	595.315	324.546	601.084	326.002	604.508	294.67	578.858	298.133	578.148	307.375	586.964	304.679	601.035	310.232	603.146	325.931	607.372	337.845	616.362	325.912	605.933	316.955	599.415	323.915	606.134
301.738	596.622	294.3	586.85	299.882	588.727	292.633	578.831	295.277	587.961	301.909	591.412	306.581	589.995	305.634	591.069	302.579	596.043	298.026	585.081	301.9	584.443	303.723	595.671	303.612	595.843	325.008	601.311	325.928	605.158	294.076	579.125	297.895	578.611	307.81	587.173	304.84	601.481	310.892	603.319	326.057	607.998	338.109	616.794	325.863	606.622	317.133	599.935	324.021	606.698
301.594	597.225	294.786	587.019	300.529	588.748	292.209	579.126	295.913	587.99	302.011	590.753	306.164	590.267	306.147	591.277	301.994	596.192	297.97	584.426	301.853	585.105	303.587	596.311	303.491	596.494	325.019	601.895	325.865	605.809	293.672	579.595	297.654	579.046	307.979	587.697	305.163	601.94	311.571	603.374	326.698	608.158	338.638	617.015	325.886	607.302	317.773	600.034	324.499	606.946
301.583	597.862	294.973	587.543	300.862	589.208	291.735	579.451	295.975	588.592	301.889	590.171	305.954	590.708	306.35	591.912	301.757	596.704	298.295	584.105	301.977	585.74	303.532	596.976	303.49	597.158	325.044	602.477	325.816	606.461	293.446	580.236	296.976	579.029	308.454	587.878	305.624	602.372	312.246	603.305	327.362	608.197	339.305	616.972	326.009	607.938	318.453	599.984	324.833	607.314
301.76	598.462	294.997	588.147	301.165	589.617	291.549	580.08	296.287	588.948	301.545	589.669	306.002	591.365	306.427	592.574	301.749	597.334	298.822	583.96	302.396	586.012	303.555	597.646	303.549	597.816	325.273	602.922	325.816	607.114	293.412	580.926	296.297	578.958	308.8	588.205	306.283	602.536	312.833	603.004	328.043	608.145	339.787	617.145	326.66	607.962	319.143	599.896	325.015	607.794
302.073	598.92	294.978	588.753	301.448	589.94	291.447	580.726	296.908	588.998	300.897	589.542	306.087	592.02	306.439	593.244	302.045	597.895	298.907	583.412	302.984	586.067	303.702	598.292	303.672	598.467	325.722	603.156	326.02	607.652	293.467	581.612	295.636	578.951	309.003	588.69	306.952	602.645	313.033	602.458	328.72	608.051	339.981	617.676	326.947	608.367	319.833	599.804	324.928	608.462
302.676	598.968	295.502	588.897	301.847	590.255	291.405	581.384	297.562	588.988	300.246	589.54	306.168	592.675	306.38	593.913	302.571	598.073	299.248	582.989	303.006	586.697	304.002	598.79	304.13	598.862	326.104	603.445	326.357	608.09	293.618	582.271	295.013	579.112	309.467	588.85	307.628	602.716	313.251	601.989	329.398	607.96	340.458	617.876	326.986	609.026	320.526	599.758	325.269	608.821
302.905	599.366	295.84	589.247	302.06	590.706	291.432	582.043	297.925	589.26	299.595	589.659	306.237	593.331	306.18	594.545	303.027	598.276	299.776	582.688	303.38	587.06	304.563	598.987	304.57	599.163	326.082	604.093	326.82	608.242	293.954	582.844	294.895	579.658	309.916	589.154	308.307	602.742	313.93	601.978	330.074	607.902	340.788	618.232	326.982	609.705	321.21	599.8	325.654	609.134
303.021	599.87	296.027	589.755	301.983	591.359	291.515	582.695	297.947	589.868	299.084	590.058	306.228	593.988	305.81	594.961	303.079	598.894	300.427	582.757	304.01	587.213	304.827	599.376	304.975	599.367	326.019	604.74	327.122	608.576	294.532	583	294.606	580.037	310.344	589.6	308.986	602.735	314.617	602.043	330.741	607.967	341.027	618.687	327.427	609.945	321.858	599.955	325.922	609.504
303.597	599.929	295.962	590.411	302.237	591.759	291.654	583.331	297.93	590.517	298.757	590.58	306.081	594.579	305.164	594.969	303.611	599.01	300.823	583.107	304.677	587.182	305.12	599.733	305.231	599.792	325.942	605.386	327.322	609.029	294.982	583.238	293.956	580.086	310.505	590.25	309.665	602.7	315.296	602.06	330.957	608.445	341.501	618.907	327.899	610.155	322.066	600.562	326.296	609.842
303.894	600.271	296.213	590.813	302.616	592.079	292.023	583.824	298.188	590.987	298.612	591.211	305.725	595.061	304.825	595.47	304.265	599.011	301.047	583.636	305.342	587.13	305.581	599.957	305.559	600.13	325.882	606.033	327.83	609.195	295.029	583.892	293.75	580.7	310.611	590.91	310.34	602.621	315.959	601.98	331.163	608.912	341.808	619.295	327.95	610.765	322.072	601.216	326.79	610.022
303.967	600.841	296.687	591.033	303.133	592.318	292.493	584.093	298.779	591.24	298.927	591.742	305.112	595.072	304.618	596.087	304.89	599.071	301.44	583.831	306.007	587.062	305.825	600.367	305.983	600.351	326.017	606.596	328.037	609.612	295.607	584.008	293.759	581.336	310.667	591.58	310.998	602.464	316.008	601.349	331.775	608.957	342.095	619.704	328.464	611.001	322.074	601.796	327.458	609.933
304.52	600.932	296.878	591.474	303.305	592.899	293.024	584.199	299.44	591.257	299.401	592.017	304.517	595.093	304.546	596.755	305.041	599.596	301.816	584.16	306.67	586.984	306.119	600.754	305.887	600.982	326.288	607.071	327.968	610.26	295.965	584.325	293.982	581.945	310.664	592.252	311.585	602.2	316.36	601.008	331.966	609.468	342.556	619.936	329.106	611.064	322.632	601.896	327.838	610.274
304.87	601.214	297.198	591.86	303.361	593.546	292.968	584.854	300.103	591.231	299.99	592.091	304.023	595.264	304.564	597.425	305.278	600.028	302.158	584.606	307.334	586.911	306.572	601.045	305.947	601.594	326.797	607.182	328.153	610.764	295.96	584.983	294.644	581.963	310.626	592.922	312.017	601.738	317.035	600.974	332.008	610.106	342.837	620.352	329.792	610.975	322.958	602.348	327.997	610.777
304.944	601.754	297.62	592.171	303.308	594.2	293.014	585.47	300.765	591.169	299.95	592.745	303.817	595.689	304.651	598.086	305.921	600.048	302.155	585.268	307.998	586.845	307.21	601.009	306.231	602.158	327.093	607.525	328.497	611.095	295.979	585.662	294.948	582.337	310.553	593.589	312.235	601.315	317.715	600.978	331.956	610.78	343.157	620.722	330.477	610.944	323.108	602.959	327.879	611.439
305.419	602.004	297.887	591.683	303.006	594.708	293.157	586.049	301.425	591.088	299.964	593.396	303.524	596.053	304.824	598.731	306.03	600.595	302.118	585.929	308.665	586.808	307.705	601.122	306.805	602.461	327.231	608.042	329.023	611.228	296.354	585.996	295.052	582.926	310.388	594.238	312.531	600.962	317.985	600.572	332.491	610.926	343.608	620.944	330.872	611.224	323.041	603.651	328.219	611.911
305.986	602.133	298.196	591.306	302.581	595.072	293.74	586.114	302.086	591.006	300.052	594.013	302.935	596.188	305.379	598.916	306.272	601.018	302.05	586.589	309.317	586.866	307.92	601.559	307.422	602.682	327.769	608.152	329.006	611.844	297.017	586.042	295.673	583.114	310.036	594.734	313.05	600.722	318.117	599.988	332.88	611.222	343.917	621.39	330.973	611.815	322.956	604.342	328.727	612.173
306.624	602.087	298.543	591.027	301.995	595.166	294.071	586.435	302.746	590.925	300.707	593.995	302.748	596.737	305.792	599.2	306.935	601.035	301.971	587.249	309.904	587.036	308.285	602.017	308.073	602.817	328.097	608.464	329.039	612.446	297.694	585.99	296.336	583.153	309.565	595.104	313.13	600.096	318.704	599.671	332.97	611.814	344.02	621.966	331.561	611.961	322.908	605.032	329.399	612.184
307.26	602.018	298.968	590.685	301.724	595.673	294.14	587.022	303.408	590.866	301.352	593.995	302.765	597.357	305.952	599.69	307.585	601.041	301.9	587.908	309.979	587.634	308.777	602.343	308.734	602.881	328.202	608.991	329.199	612.98	297.948	586.407	297.019	583.106	309.176	595.31	313.113	599.42	319.363	599.512	333.534	611.928	343.972	622.625	332.206	611.991	322.91	605.722	330.069	612.112
307.895	601.953	298.976	590.347	301.58	596.31	294.715	587.099	304.069	590.851	301.958	594.043	303.048	597.908	305.924	600.342	307.995	601.286	301.837	588.569	310.353	587.912	309.434	602.463	309.397	602.918	328.737	609.119	329.714	613.13	298.125	586.922	297.7	583.029	308.864	595.671	313.038	598.745	320.05	599.433	333.876	612.263	344.428	622.873	332.811	612.031	323.452	605.914	330.738	612.029
308.533	601.938	298.572	590.011	301.534	596.966	295.061	587.4	304.728	590.892	302.042	594.678	303.58	598.061	306.13	600.833	308.028	601.914	301.843	589.23	310.895	588.026	310.102	602.478	310.062	602.927	329.06	609.449	330.069	613.421	298.762	586.974	298.381	582.95	308.545	596.06	312.953	598.07	320.743	599.418	333.994	612.819	344.819	623.233	332.934	612.603	323.8	606.265	331.406	611.937
308.85	602.255	298.061	589.763	301.57	597.62	295.123	587.979	304.928	591.413	302.02	595.326	304.021	598.265	306.647	601.108	308.558	602.232	302.075	589.722	311.21	588.561	310.767	602.431	310.726	602.895	329.05	610.095	330.036	614.073	298.997	587.479	299.063	582.879	307.879	595.981	312.889	597.394	321.434	599.473	334.564	612.925	345.09	623.711	333.355	612.885	324.027	606.712	332.078	611.886
308.985	602.771	297.772	589.322	301.68	598.258	295.692	588.068	305.223	591.791	301.924	595.986	304.014	598.92	307.307	601.034	309.175	602.439	302.506	590.06	311.274	589.167	311.424	602.313	311.388	602.838	328.974	610.74	329.965	614.722	299.047	588.13	299.746	582.828	307.337	596.12	312.851	596.717	322.106	599.607	334.868	613.296	345.028	624.404	333.938	612.986	324.523	606.914	332.632	612.037
309.445	603.11	297.72	588.672	301.955	598.835	296.056	588.382	305.688	591.933	301.969	596.634	303.953	599.576	307.745	601.2	309.841	602.534	302.816	590.355	311.124	589.765	311.828	601.879	312.047	602.754	328.969	611.362	329.956	615.345	298.956	588.817	300.424	582.874	306.91	596.409	313.117	596.179	322.754	599.832	335.029	613.812	344.965	625.097	334.622	612.92	324.823	607.309	333.065	612.388
309.988	603.26	298.071	588.199	302.472	599.019	296.11	589.031	306.079	592.37	302.333	596.963	303.922	600.22	307.927	601.649	310.512	602.565	303.142	590.693	310.549	589.937	312.139	601.423	312.694	602.604	329.119	611.939	330.12	615.906	298.957	589.501	300.893	583.14	306.73	596.853	313.518	595.871	322.938	600.423	335.597	613.921	345.065	625.654	334.919	613.363	325.098	607.724	333.282	612.798
310.619	603.212	298.491	587.884	302.991	599.137	296.04	589.685	306.283	592.911	302.945	597.039	304.041	600.83	308.344	602.095	311.185	602.569	303.488	591.067	310.22	590.277	312.355	600.971	313.313	602.386	329.612	612.097	330.591	616.093	299.243	589.911	300.993	583.755	306.284	597.115	314.012	595.732	323.27	600.788	335.868	614.328	345.496	625.935	335.02	613.97	325.58	607.917	333.632	613.125
310.848	602.733	298.976	587.748	303.027	599.761	295.963	590.34	306.241	593.564	303.606	596.978	304.52	601.029	308.88	602.397	311.857	602.543	304.146	590.979	310.01	590.701	312.996	600.999	313.898	602.083	330.051	612.292	331.04	616.287	299.855	589.994	301.508	583.879	305.794	597.376	314.122	595.113	323.711	600.991	336.064	614.811	345.934	626.297	334.936	614.653	325.883	608.348	334.064	613.402
311.113	602.291	299.123	587.178	303.448	600.002	295.892	590.996	305.764	593.866	303.936	597.302	305.014	601.193	309.532	602.552	312.525	602.462	304.662	591.107	309.533	590.956	313.551	600.916	313.97	601.472	330.113	612.867	331.118	616.872	299.936	590.588	301.933	584.18	305.707	598.031	314.536	594.725	323.959	601.496	336.626	614.925	346.18	626.818	335.406	614.941	326.018	608.911	333.986	614.07
311.495	601.974	299.475	586.794	303.975	600.124	295.99	591.61	305.347	594.167	304.012	597.915	305.039	601.821	310.202	602.607	313.181	602.328	305.04	591.449	308.942	591.006	313.968	600.659	314.239	601.088	330.556	613.065	331.556	617.085	300.307	590.899	302.187	584.77	305.898	598.613	315.167	594.526	323.988	602.121	336.888	615.357	346.2	627.513	336.005	615.031	325.938	609.6	334.101	614.624
312.082	601.95	300.112	586.675	303.892	600.75	296.291	592.009	305.066	594.507	303.967	598.569	305.493	602.025	310.874	602.632	313.824	602.137	305.309	591.775	308.331	590.994	314.172	600.113	314.844	601.053	331.022	613.238	332.049	617.238	300.914	590.978	302.159	585.453	306.267	599.061	315.843	594.53	324.03	602.713	336.984	615.943	346.156	628.209	336.678	614.952	326.384	609.875	334.378	615.067
312.72	601.999	300.689	586.917	303.909	601.381	296.898	592.052	304.7	594.859	304.289	598.922	306.133	602.036	311.547	602.626	313.899	601.534	305.676	592.089	308.098	591.453	314.567	599.706	314.943	600.484	330.994	613.88	332.105	617.823	301.594	590.951	302.105	586.136	306.855	599.125	316.46	594.73	324.526	602.963	336.928	616.621	346.098	628.903	336.896	615.448	326.749	610.215	334.827	615.258
313.357	602.049	301.032	587.33	304.035	601.987	297.027	592.586	304.208	595.03	304.882	599.04	306.767	602.03	312.216	602.566	314.185	601.037	306.146	592.391	307.748	591.782	315.191	599.473	315.221	600.09	331.028	614.503	332.505	618.064	302.057	591.306	302.03	586.817	307.073	599.574	316.959	595.096	325.166	602.942	337.358	616.941	346.031	629.597	337.252	615.783	327.001	610.643	335.131	615.635
313.734	601.803	301.057	587.945	304.578	602.341	297.27	593.007	303.55	594.94	305.542	598.978	307.001	602.442	312.876	602.451	314.685	600.651	306.195	593.046	307.297	591.989	315.849	599.35	315.822	600.015	331.16	615.044	333.007	618.192	302.314	591.877	301.949	587.497	307.268	600.047	317.063	595.738	325.751	603.036	337.951	617.059	345.961	630.29	337.679	616.031	327.451	610.899	335.4	616.059
313.992	601.403	301.635	588.016	305.173	602.588	297.89	593.044	303.168	595.268	305.882	599.284	307.115	603.012	313.509	602.273	315.343	600.513	306.199	593.707	306.637	591.9	316.511	599.254	315.934	599.481	331.769	615.064	332.914	618.834	302.234	592.557	301.882	588.179	307.863	600.106	317.032	596.401	326.147	603.509	338.627	616.956	345.895	630.984	337.903	616.491	327.757	611.264	336.069	615.985
314.29	600.906	302.126	588.261	305.808	602.753	297.98	593.576	302.84	595.613	305.982	599.853	307.694	603.275	313.883	601.806	316.007	600.408	306.16	594.37	306.165	592.157	317.178	599.183	316.189	599.006	332.038	615.427	332.954	619.449	301.76	592.846	301.839	588.862	308.053	600.59	317.116	596.919	326.18	604.178	338.856	617.393	345.839	631.678	338.282	616.8	328.016	611.685	336.63	616.102
314.758	600.572	302.402	588.854	306.46	602.834	297.971	594.214	302.549	595.923	305.913	600.514	308.324	603.38	314.167	601.34	316.676	600.332	306.096	595.03	305.859	592.644	317.847	599.143	316.72	598.683	332.093	616.007	333.116	620.017	301.231	593.108	301.884	589.541	308.255	601.101	317.751	596.945	326.138	604.869	339.158	617.794	345.798	632.374	338.681	617.087	328.466	612.056	337.074	616.371
315.364	600.372	302.542	589.497	307.115	602.886	297.997	594.854	302.055	596.216	306.219	600.954	308.977	603.369	314.428	600.918	317.349	600.295	306.028	595.691	305.924	593.307	318.517	599.117	317.368	598.613	332.698	616.045	333.727	620.188	300.797	593.511	302.283	589.877	308.885	601.274	317.957	597.438	326.055	605.558	339.654	618.033	345.815	633.068	338.915	617.528	329.097	612.12	337.228	616.872
315.993	600.259	302.64	590.15	307.772	602.911	298.512	595.001	301.698	596.651	306.787	601.211	309.596	603.183	315.099	600.937	318.022	600.28	305.956	596.351	306.001	593.969	319.188	599.106	318.022	598.646	333.017	616.376	334.36	620.253	300.76	594.168	302.749	590.128	309.501	601.161	318.002	598.084	325.962	606.245	340.323	617.976	346.005	633.645	339.315	617.86	329.79	612.064	337.625	617.14
316.626	600.169	302.697	590.809	308.43	602.892	299.152	595.013	301.579	597.302	307.454	601.167	309.888	602.748	315.769	600.986	318.695	600.283	305.888	597.011	306.019	594.584	319.859	599.127	318.665	598.795	333.063	616.986	335.013	620.225	300.987	594.695	302.908	590.608	309.948	600.841	317.973	598.754	325.9	606.935	340.773	618.179	346.422	634.056	339.843	618.027	330.48	611.976	338.066	617.37
317.263	600.107	302.719	591.47	309.087	602.852	299.784	595.007	301.625	597.959	308.118	601.096	310.009	602.193	316.438	601.051	319.367	600.32	305.828	597.672	305.621	594.904	320.528	599.161	318.875	599.317	333.668	617.029	335.663	620.15	301.473	595.036	303.344	590.892	309.98	600.211	318.465	598.936	325.926	607.581	340.989	618.664	346.862	634.304	340.528	617.939	331.17	611.886	338.218	617.887
317.903	600.089	302.723	592.131	309.742	602.789	299.97	595.477	301.82	598.54	308.781	601.01	310.55	602.027	317.109	601.089	320.036	600.386	305.779	598.334	305.267	595.231	321.197	599.209	319.148	599.771	333.991	617.324	336.312	620.07	301.835	595.338	303.913	591.023	310.485	599.981	318.876	599.193	326.365	607.934	341.447	618.928	347.013	634.793	340.85	618.332	331.861	611.81	338.628	618.143
318.542	600.09	302.706	592.793	310.389	602.669	300.003	596.1	302.215	599.002	309.446	600.95	311.157	602.001	317.647	600.918	320.701	600.483	305.794	598.996	304.938	595.557	321.862	599.292	319.593	600.055	333.935	617.96	336.961	619.983	302.176	595.683	304.591	590.943	311.125	599.91	318.937	599.779	326.725	608.262	342.028	618.994	346.972	635.454	341.18	618.705	332.554	611.751	339.056	618.383
319.181	600.122	302.659	593.453	311.019	602.495	299.987	596.747	302.703	599.172	309.806	601.235	311.812	602.075	318.063	600.585	321.347	600.665	305.953	599.579	304.612	595.847	322.52	599.411	320.231	600.028	333.982	618.576	337.611	619.916	302.509	596.05	304.877	591.363	311.795	599.964	319.471	599.995	327.058	608.597	342.663	618.963	347.29	635.879	341.567	618.992	333.245	611.793	339.208	618.916
319.815	600.195	302.589	594.11	311.63	602.261	300.427	596.969	303.068	599.456	310.007	601.726	312.47	602.086	318.213	600.017	321.802	601.052	306.289	600.062	304.164	596.146	323.168	599.569	320.893	599.96	334.243	619.008	338.253	619.91	302.894	596.354	305.188	591.745	312.465	600.027	320.1	600.055	327.417	608.986	342.909	619.442	347.715	636.185	341.845	619.383	333.782	612.071	339.747	618.989
320.445	600.298	302.484	594.764	311.889	601.741	301.043	597.01	303.224	599.973	310.429	602.146	312.846	601.791	318.69	599.722	322.13	601.533	306.723	600.228	303.702	596.5	323.736	599.899	321.554	599.886	334.859	619.125	338.882	619.987	303.216	596.708	305.637	591.943	313.132	600.059	320.774	599.965	328.042	608.985	343.264	619.771	348.059	636.541	342.189	619.752	334.135	612.562	340.387	618.98
321.058	600.475	302.275	595.385	312.175	601.3	301.697	596.953	303.708	600.149	311	602.352	313.002	601.258	319.34	599.602	322.389	601.828	307.051	600.554	303.563	597.151	324.003	600.397	322.217	599.871	335.498	619.07	338.977	620.542	303.546	597.065	306.069	592.356	313.796	600.025	321.445	599.946	328.625	609.06	343.653	620.047	347.987	637.233	342.617	620.053	334.038	613.246	340.952	619.167
321.595	600.777	301.937	595.844	312.523	600.984	301.949	597.368	304.079	600.442	311.66	602.404	313.496	601.095	320.01	599.639	322.776	602.151	307.23	601.122	303.505	597.812	324.073	600.988	322.727	600.05	336.141	619.003	339.222	620.944	303.985	597.359	306.279	592.902	313.941	599.511	321.86	600.206	329.03	609.425	343.921	620.476	347.915	637.925	343.303	619.971	334.216	613.726	341.041	619.728
322.064	601.17	301.363	595.963	313.15	601.015	302.01	597.986	304.202	600.99	312.315	602.296	313.801	600.765	320.591	599.875	323.151	602.545	307.828	601.32	303.507	598.477	324.712	601.009	322.993	600.528	336.781	618.996	339.84	620.981	303.998	597.967	306.24	593.57	314.166	599.001	321.985	600.776	328.942	610.083	344.291	620.769	347.988	638.548	343.748	620.208	334.54	614.088	341.046	620.366
322.119	601.794	300.973	596.357	313.651	600.905	301.969	598.632	304.674	601.153	312.76	601.948	313.933	600.279	321.038	600.255	323.139	603.218	308.473	601.401	303.604	599.136	324.999	601.39	323.349	600.811	336.954	619.451	340.481	620.983	304.051	598.563	305.738	593.895	314.698	598.651	322.517	600.907	329.047	610.674	344.691	621.055	348.302	639.053	344.079	620.598	334.914	614.385	341.155	620.947
322.135	602.394	300.744	596.874	313.91	600.52	302.342	598.938	305.038	601.448	313.078	601.478	314.382	599.862	321.105	600.855	323.084	603.888	309.133	601.361	303.906	599.675	325.024	602.034	323.686	601.121	337.104	619.95	340.938	621.167	304.368	598.995	305.322	594.204	315.337	598.479	322.839	601.254	329.413	611.147	345.055	621.48	348.964	638.994	344.422	620.973	335.232	614.794	341.719	620.964
322.11	602.968	300.797	597.526	314.224	600.039	302.927	599.046	305.149	602.047	313.367	601.117	314.926	599.581	321.563	601.071	323.008	604.557	309.685	601.076	304.332	600.094	324.995	602.693	323.971	601.521	337.708	620.07	340.973	621.776	304.783	599.262	304.976	594.509	315.997	598.357	322.997	601.768	330.104	611.149	345.093	622.107	349.588	639.059	345.031	620.98	335.679	615.04	342.367	620.943
322.653	603.058	301.22	597.848	314.656	599.657	303.58	598.979	305.692	602.345	313.673	600.795	315.569	599.44	322.051	601.254	322.927	605.225	310.029	600.647	304.833	600.214	325.366	602.968	324.334	601.787	338.341	620.056	341.452	621.929	305.132	599.6	304.657	594.882	316.664	598.276	323.53	601.909	330.793	611.096	345.032	622.786	350.111	639.314	345.617	621.043	336.37	614.96	342.986	621.089
323.048	603.315	301.67	598.12	315.288	599.483	303.882	599.313	306.315	602.549	313.984	600.462	316.226	599.384	322.097	601.868	322.876	605.896	310.082	600.043	305.109	600.602	325.95	603.048	324.715	602.089	338.987	619.981	341.923	622.101	305.401	600.031	304.108	594.952	317.334	598.228	324.142	601.939	331.48	611.003	344.945	623.465	350.087	640.005	346.004	621.424	336.809	615.244	343.324	621.621
323.099	603.938	301.911	598.509	315.938	599.385	304.046	599.812	306.969	602.667	314.269	599.938	316.885	599.357	322.563	602.063	322.928	606.514	310.671	599.943	305.323	601.064	326.039	603.689	325.105	602.48	339.633	619.907	341.999	622.716	305.823	600.281	303.455	594.932	318.005	598.198	324.767	601.96	332.167	610.902	344.899	624.146	350.015	640.696	346.307	621.756	337.146	615.633	343.541	622.243
323.051	604.57	302.281	598.796	316.592	599.319	304.586	599.922	307.631	602.736	314.777	599.612	317.544	599.362	323.034	602.252	323.285	606.952	311.325	599.941	305.828	601.192	326.016	604.344	325.138	603.108	340.274	619.905	341.997	623.352	306.146	600.669	302.899	595.246	318.677	598.189	325.077	602.489	332.857	610.847	345.052	624.685	349.975	641.36	346.705	622.075	337.421	616.069	343.634	622.91
322.977	605.206	302.655	599.084	317.249	599.289	304.861	600.299	308.294	602.78	315.409	599.411	318.2	599.425	323.08	602.861	323.692	607.219	311.986	600.002	306.078	601.627	325.924	605.008	325.097	603.771	340.87	619.988	342.083	623.885	306.458	601.079	302.598	595.802	319.349	598.21	325.158	603.114	333.501	610.914	345.493	625.012	350.179	641.924	347.234	622.385	338.111	615.978	343.633	623.583
322.902	605.841	302.915	599.475	317.907	599.295	305.011	600.802	308.959	602.795	316.069	599.302	318.848	599.533	323.563	603.042	324.068	607.487	312.647	600.064	306.278	602.163	325.848	605.674	325.023	604.432	340.95	620.569	342.662	623.958	307.145	601.012	302.438	596.459	320.02	598.248	325.105	603.79	334.026	611.247	345.83	625.337	350.749	641.965	347.416	623.047	338.655	616.123	343.583	624.254
322.94	606.467	303.268	599.778	318.564	599.324	305.556	600.928	309.624	602.777	316.732	599.227	319.485	599.698	324.02	603.26	324.313	607.923	313.3	600.067	306.888	602.415	325.878	606.328	324.948	605.093	341.282	620.878	342.905	624.359	307.662	601.164	302.406	597.142	320.69	598.304	325.007	604.463	334.039	611.876	346.165	625.647	351.413	641.944	347.533	623.723	339.069	616.447	343.479	624.919
323.091	607.018	303.629	600.075	319.218	599.391	305.845	601.284	310.288	602.738	317.398	599.175	319.852	600.153	324.062	603.917	324.711	608.198	313.94	599.975	307.532	602.56	326.041	606.903	324.893	605.755	341.83	620.95	343.046	624.857	308.041	601.5	302.498	597.816	321.353	598.407	324.947	605.137	334.065	612.504	346.505	625.94	352.039	642.127	347.59	624.411	339.295	616.921	343.234	625.54
323.711	607.013	303.906	600.453	319.86	599.522	305.979	601.795	310.95	602.674	318.066	599.151	320.156	600.599	324.001	604.581	325.088	608.49	314.022	599.404	308.194	602.641	326.645	607.049	324.87	606.419	342.044	621.499	343.616	624.929	308.228	602.096	302.708	598.44	322.003	598.56	325.028	605.709	334.254	613.046	346.961	626.292	352.377	642.697	347.591	625.102	339.865	616.973	342.815	625.914
323.999	607.347	304.254	600.779	320.46	599.73	306.458	602.177	311.603	602.555	318.734	599.148	320.4	600.991	323.964	605.24	325.305	608.94	314.244	598.91	308.862	602.665	327.285	607.044	325.215	606.81	342.14	622.095	343.89	625.305	308.801	602.362	303.082	598.975	322.639	598.768	325.516	605.943	334.92	613.006	347.186	626.826	352.602	643.344	347.556	625.792	340.504	616.993	342.191	625.983
324.015	607.961	304.605	601.093	320.934	600.122	307.031	602.399	312.237	602.378	319.402	599.159	321.009	600.961	324.04	605.881	325.715	609.195	314.849	598.67	309.529	602.651	327.854	607.062	325.614	607.134	342.099	622.743	344.012	625.838	309.473	602.506	303.661	599.08	322.914	599.295	325.829	606.323	335.54	613.069	347.217	627.507	352.733	644.026	347.488	626.479	341.033	617.271	341.975	626.5
324.61	608.004	304.854	601.444	321.14	600.595	307.683	602.489	312.838	602.111	320.07	599.197	321.572	601.03	324.573	606.019	326.09	609.484	315.503	598.635	310.194	602.604	327.955	607.636	325.997	607.418	342.022	623.389	344.568	625.912	310.162	602.57	304.034	599.378	323.22	599.705	325.986	606.822	336.064	613.278	347.18	628.19	352.782	644.721	347.365	627.159	341.033	617.905	342.15	626.842
324.978	608.277	305.17	601.888	321.332	601.024	308.341	602.475	312.961	601.533	320.734	599.268	321.98	601.354	324.998	606.253	326.294	609.95	316.152	598.698	310.851	602.492	328.356	607.879	325.984	608.022	341.946	624.036	344.962	626.244	310.853	602.56	304.102	599.996	323.567	599.984	325.899	607.495	336.191	613.819	347.127	628.871	352.797	645.416	347.036	627.711	341.078	618.518	342.732	626.975
325.021	608.878	305.569	602.317	321.885	601.156	308.989	602.391	313.195	601.105	321.395	599.366	322.242	601.742	324.999	606.904	326.712	610.195	316.777	598.879	311.462	602.259	328.858	608.041	326.049	608.583	341.875	624.682	345.218	626.789	311.541	602.501	304.712	600.073	324.234	599.904	326.271	607.884	336.6	614.105	347.063	629.552	352.779	646.112	346.571	628.085	341.283	619.034	342.884	627.484
325.545	608.993	306.201	602.502	322.032	601.641	309.624	602.24	313.79	601.059	322.045	599.52	322.543	602.092	325.003	607.554	327.083	610.496	316.908	599.424	311.951	601.907	329.129	608.59	326.386	608.961	341.891	625.328	345.226	627.442	312.22	602.386	304.95	600.445	324.753	600.089	326.813	608.063	337.046	614.354	346.992	630.232	352.716	646.805	345.949	628.16	341.798	619.205	343.222	627.811
325.975	609.199	306.85	602.615	322.015	602.275	309.876	601.724	313.93	600.534	322.607	599.827	322.961	602.347	325.235	607.98	327.285	610.984	317.133	599.899	311.984	601.276	329.222	609.222	326.784	609.249	342.082	625.817	345.209	628.095	312.78	602.037	304.838	601.107	325.119	600.53	327.485	607.969	336.986	615.042	346.922	630.912	352.602	647.491	345.683	628.739	342.121	619.566	343.726	627.976
325.996	609.806	307.508	602.685	322.132	602.827	310.171	601.287	314.172	600.103	323.043	600.243	323.224	602.712	325.872	608.002	327.887	610.974	317.708	600.11	312.413	601.09	329.223	609.891	327.021	609.652	342.617	625.967	345.167	628.748	313.043	601.526	304.985	601.755	325.023	601.194	327.828	608.314	337.09	615.649	346.858	631.593	352.429	648.16	345.516	629.404	342.338	620.037	343.897	628.481
326.452	609.975	308.169	602.708	322.546	603.077	310.51	600.934	314.769	600.023	323.106	600.821	323.537	603.054	326.016	608.567	328.506	611.007	318.357	600.126	313.031	601.099	329.183	610.561	326.927	610.311	342.851	626.373	345.107	629.399	313.187	600.985	305.386	602.227	325.166	601.668	328.155	608.677	337.38	616.078	346.811	632.275	352.155	648.795	345.415	630.088	342.887	620.2	344.242	628.794
326.961	610.088	308.831	602.703	323.056	603.229	311.16	600.979	314.922	599.531	323.549	601.045	324.026	603.295	326.026	609.22	329.047	611.241	319.02	600.093	313.676	601.065	329.128	611.229	327.178	610.785	343.085	626.766	345.045	630.051	313.84	600.928	305.969	602.558	325.518	601.979	328.523	608.977	337.965	616.176	346.808	632.957	351.556	648.932	345.367	630.777	343.015	620.722	344.717	628.973
326.969	610.705	309.491	602.676	323.091	603.88	311.816	601.044	315.14	599.028	324.061	601.224	324.135	603.869	325.938	609.887	329.037	611.862	319.681	600.038	314.026	600.644	329.064	611.897	327.609	611.04	343.58	626.9	344.981	630.702	314.051	600.448	306.631	602.732	325.942	602.317	328.818	609.338	338.126	616.706	346.937	633.562	351.102	649.206	345.343	631.468	343.01	621.379	345.005	629.463
327.344	610.962	310.149	602.607	323.057	604.533	312.471	601.121	315.652	598.66	324.159	601.871	324.126	604.525	325.97	610.543	329.061	612.471	320.342	599.974	314.187	600.034	328.994	612.564	328.264	610.932	343.878	627.291	344.929	631.354	314.235	599.901	307.304	602.853	326.119	602.843	329.144	609.702	338.435	617.084	347.324	633.996	350.934	649.802	345.343	632.159	343.192	621.942	345.094	630.059
327.929	611.015	310.798	602.489	322.98	605.187	313.129	601.133	316.278	598.481	324.158	602.532	324.059	605.181	326.252	610.948	329.229	612.998	321.002	599.908	314.118	599.37	328.926	613.231	328.781	611.147	344.045	627.815	344.905	632.006	314.866	599.67	307.984	602.934	326.101	603.513	329.511	610.064	339.018	617.18	347.773	634.24	351	650.493	345.386	632.849	343.679	622.148	345.036	630.731
327.977	611.614	311.421	602.312	322.914	605.841	313.673	600.968	316.931	598.365	324.109	603.198	323.985	605.837	326.871	610.995	329.73	613.158	321.663	599.843	314.028	598.709	328.863	613.899	329.099	611.553	343.975	628.461	344.924	632.658	315.546	599.618	308.668	602.97	326.022	604.18	330.185	609.984	339.119	617.778	348.024	634.633	351.069	651.186	345.476	633.533	344.08	622.426	344.95	631.4
328.285	611.946	311.882	601.902	322.97	606.462	314.069	600.575	317.592	598.3	324.034	603.862	323.918	606.494	326.957	611.566	330.084	613.47	322.325	599.791	313.946	598.049	328.809	614.567	329.074	612.213	344.254	628.795	345.374	632.853	316.218	599.695	309.353	602.975	325.944	604.848	330.684	610.14	339.541	618.022	347.951	635.313	351.127	651.879	345.628	634.199	344.21	622.974	344.907	632.07
328.871	611.991	312.131	601.418	323.143	607.03	313.992	599.949	318.257	598.276	323.958	604.527	323.877	607.152	327.252	611.929	330.214	614.014	322.987	599.752	313.942	597.39	328.78	615.237	328.991	612.872	344.717	628.98	345.859	633.077	316.86	599.92	310.038	602.958	325.871	605.516	331.023	610.511	340.221	617.991	348.2	635.785	351.102	652.57	345.93	634.808	344.767	623.129	344.96	632.684
329.014	612.533	312.3	600.945	323.754	607.071	314.033	599.346	318.921	598.276	323.889	605.191	324.075	607.685	327.869	611.972	330.748	614.149	323.651	599.737	314.333	597.098	328.783	615.905	329.007	613.477	345.036	629.443	346.262	633.53	316.942	600.537	310.722	602.917	325.857	606.186	331.341	610.9	340.83	618.107	348.582	636.122	350.692	652.874	346.493	634.986	345.066	623.534	345.449	632.934
329.053	613.135	312.958	601.004	324.019	607.436	314.311	598.81	319.586	598.307	323.845	605.858	324.413	608.094	327.941	612.561	331.094	614.472	324.302	599.816	314.804	596.889	328.861	616.567	329.252	613.972	345.165	630.011	346.483	634.123	317.26	600.952	311.402	602.842	326.081	606.702	331.866	611.007	341.08	618.559	349.086	636.323	350.194	653.095	346.951	635.205	345.067	624.223	345.775	633.284
328.972	613.77	313.535	600.932	323.979	608.086	314.907	598.628	320.246	598.386	323.933	606.492	324.939	608.227	328.252	612.911	331.204	615.028	324.812	600.049	314.916	596.38	329.287	616.881	329.693	614.186	345.146	630.661	346.639	634.756	317.875	601.112	312.079	602.738	326.454	607.096	332.507	610.964	341.279	619.053	349.033	637.002	350.007	653.646	346.973	635.839	344.98	624.914	346.046	633.66
328.951	614.405	314.021	600.735	324.04	608.694	315.55	598.562	320.895	598.513	324.179	606.985	325.053	608.735	328.871	612.955	331.752	615.144	324.99	600.596	315.277	595.94	329.732	617.147	330.078	614.448	345.085	631.309	346.747	635.401	318.566	601.069	312.749	602.599	326.833	607.325	332.895	611.319	341.908	619.116	348.964	637.681	350.017	654.31	347.477	636.207	345.043	625.551	346.472	633.912
329.083	614.903	314.118	600.14	324.371	609.023	316.205	598.619	321.522	598.721	324.797	607.023	324.998	609.392	328.941	613.561	332.084	615.477	325.379	600.823	315.781	595.586	329.92	617.587	330.253	614.938	345.019	631.956	346.833	636.049	319.256	601.009	313.381	602.35	327.145	607.707	333.214	611.682	342.087	619.622	348.909	638.347	349.852	654.799	348.102	636.435	345.283	626.057	346.77	634.271
329.676	614.942	314.507	599.747	324.979	609.065	316.724	598.947	321.864	599.187	325.002	607.491	324.921	610.047	329.268	613.91	332.197	616.028	325.785	601.061	316.433	595.451	330.335	617.846	330.688	615.164	344.948	632.603	346.907	636.699	319.945	600.937	313.812	601.943	327.481	608.097	333.52	612.037	342.339	620.052	349.177	638.865	349.305	654.944	348.785	636.527	345.911	626.121	347.047	634.657
329.93	615.344	315.12	599.515	324.988	609.69	317.078	599.385	322.155	599.633	325.18	607.984	325.047	610.613	329.871	613.983	332.76	616.13	326.089	601.549	317.094	595.422	330.724	618.125	331.076	615.436	344.891	633.251	346.963	637.351	320.635	600.868	314.019	601.369	328.149	608.06	333.95	612.338	342.965	620.108	349.582	639.157	349.012	655.442	349.474	636.492	346.133	626.645	347.46	634.968
330.004	615.93	315.772	599.409	324.995	610.331	317.161	599.949	322.479	599.908	325.803	608.017	325.321	611.066	329.945	614.578	333.077	616.484	326.135	602.171	317.755	595.471	330.887	618.584	331.237	615.937	344.863	633.9	347.005	638.003	321.325	600.821	314.432	601.09	328.815	607.984	334.014	612.9	343.075	620.676	350.023	639.367	348.903	656.051	350.146	636.368	346.182	627.331	348.059	634.995
329.975	616.561	316.429	599.338	325.02	610.975	317.718	599.996	322.797	600.268	326.058	608.486	325.854	611.179	330.286	614.905	333.194	617.04	326.092	602.833	318.393	595.647	331.301	618.949	331.685	616.152	344.873	634.549	347.038	638.657	322.013	600.815	314.993	601	329.481	607.895	334.015	613.514	343.396	621.037	350.202	639.91	348.961	656.745	350.766	636.137	346.15	628.026	348.64	635.034
330.264	616.896	317.089	599.297	325.617	611.014	318.345	599.997	323.122	600.614	326.137	609.122	325.985	611.646	330.857	614.999	333.777	617.127	326.012	603.492	318.829	596.059	331.838	619.183	332.083	616.417	345.283	634.841	347.066	639.311	322.69	600.902	315.633	601.018	330.151	607.846	334.326	613.931	344.014	621.107	350.727	640.06	349.043	657.437	350.945	635.542	346.092	628.719	348.947	635.449
330.821	616.981	317.75	599.299	325.997	611.274	318.906	600.128	323.466	600.882	326.083	609.788	325.942	612.287	330.93	615.58	334.075	617.503	325.934	604.151	319.085	596.599	332.508	619.17	332.219	616.94	345.703	635.127	347.082	639.965	322.914	601.407	315.861	600.572	330.706	608.053	334.718	614.221	344.007	621.788	351.406	640.019	349.085	658.13	351.301	635.19	346.025	629.412	349.289	635.762
330.917	617.51	318.411	599.326	326.018	611.903	319.079	600.619	323.873	601.229	326.011	610.452	326.115	612.858	331.279	615.912	334.193	618.06	325.877	604.81	318.993	597.257	333.177	619.116	332.66	617.15	346.035	635.495	347.091	640.619	323.198	601.821	316.182	600.098	331.089	608.443	335.088	614.517	344.032	622.457	352.084	639.932	348.996	658.729	351.709	634.931	345.952	630.103	349.644	636.069
331.195	617.861	319.07	599.376	326.578	612.004	319.316	601.047	324.18	601.685	325.935	611.117	326.586	613.047	331.865	616.026	334.863	618.015	325.883	605.471	319.183	597.744	333.844	619.048	333.06	617.409	346.052	636.089	347.091	641.273	323.738	601.947	316.608	599.668	331.005	609.104	335.347	614.929	344.165	623.027	352.674	640.073	348.466	658.929	351.883	634.454	345.881	630.796	350.009	636.444
331.736	617.952	319.721	599.492	326.979	612.263	319.966	601.082	324.222	602.346	325.871	611.782	327.226	613.022	332.532	615.957	335.485	618.049	326.242	605.831	319.563	598.051	334.51	618.972	333.196	617.957	345.994	636.736	347.085	641.927	323.905	602.477	317.276	599.524	331.119	609.671	335.774	615.21	344.826	623.046	353.097	640.386	348.114	659.331	352.253	633.99	345.821	631.489	350.006	637.052
331.892	618.428	320.344	599.682	327.016	612.881	320.62	601.029	324.201	603.009	325.923	612.434	327.803	613.11	332.874	616.263	336.022	618.191	326.662	606.12	320.224	597.964	335.178	618.906	333.752	618.026	345.943	637.384	347.074	642.581	324.241	602.823	317.955	599.453	331.42	610.062	336.046	615.608	345.051	623.527	353.2	640.933	347.941	659.871	352.764	633.631	345.775	632.183	349.923	637.719
332.115	618.838	320.941	599.947	327.558	612.996	321.275	600.953	324.156	603.673	326.144	612.931	328.074	613.49	333.009	616.809	336.087	618.795	326.911	606.502	320.704	598.16	335.845	618.868	334.377	618.034	346.22	637.761	347.048	643.235	324.759	602.976	318.639	599.43	332.086	609.991	335.957	616.281	345.056	624.21	353.714	641.119	348.021	660.563	353.445	633.52	345.768	632.878	349.868	638.389
332.657	618.935	320.966	600.578	328.189	613.01	321.931	600.888	324.095	604.336	326.754	612.983	328.183	614.025	333.568	616.924	336.518	619.054	327.278	606.79	321.076	598.493	336.513	618.882	334.917	618.178	346.631	638.045	347.017	643.889	325	603.512	319.322	599.465	332.651	610.106	336.186	616.767	344.973	624.899	354.063	641.45	348.071	661.255	354.133	633.507	345.914	633.529	350.192	638.849
332.875	619.349	321.272	600.906	328.833	612.989	322.546	600.98	324.028	604.997	326.93	613.45	328.766	614.095	333.857	617.296	337.177	619.084	327.655	607.078	321.319	598.926	336.83	619.282	335.107	618.662	347.1	638.353	346.983	644.542	325.045	604.14	319.995	599.581	333.076	610.373	336.533	617.124	344.998	625.564	354.015	642.13	347.874	661.746	354.818	633.562	346.237	634.014	350.686	639.092
333.045	619.819	321.884	600.905	328.973	613.494	323.022	601.23	323.961	605.659	326.952	614.067	329.056	614.461	334.012	617.804	337.846	619.005	327.921	607.473	321.867	598.974	337.13	619.705	335.367	619.085	347.316	638.882	346.924	645.193	324.971	604.828	320.586	599.825	333.201	610.894	336.985	617.333	345.272	625.988	354.114	642.712	347.387	661.998	355.495	633.69	346.885	634.051	351.353	639.01
333.568	619.979	322.524	600.938	329.181	613.954	323.07	601.835	323.896	606.322	326.932	614.73	329.154	615.022	334.553	618.015	338.515	618.93	328.27	607.758	322.488	598.968	337.514	620.046	336.02	619.145	347.383	639.523	346.854	645.844	324.928	605.517	321.025	600.279	333.662	611.113	337.22	617.783	345.918	626.018	354.459	643.058	347.087	662.42	355.882	634.177	347.029	634.593	351.764	639.252
334.159	620.003	322.957	601.226	329.797	614.043	323.524	602.041	323.846	606.985	327.4	614.98	329.756	615.085	335.173	618.044	339.179	618.891	328.646	608.035	322.983	599.258	338.143	620.041	336.681	619.115	347.319	640.169	346.774	646.493	325.301	605.847	321.224	600.736	334.061	611.393	337.551	618.125	346.125	626.629	355.084	643.133	347.008	662.999	356.188	634.622	347.294	635.031	352.098	639.607
334.772	619.964	323.148	601.807	330.441	613.995	324.031	602.195	323.817	607.648	328.027	615.051	330.058	615.445	335.841	617.971	339.814	619.021	329	608.429	323.054	599.821	338.809	619.968	337.343	619.055	347.047	640.657	346.664	647.137	325.747	606.12	321.527	601.09	334.048	612.057	338.011	618.325	346.206	627.302	355.299	643.764	347.007	663.632	356.441	635.003	347.967	635.091	352.375	640.066
334.891	620.483	323.08	602.46	331.094	613.937	324.057	602.818	323.836	608.311	328.685	614.978	330.119	616.041	336.511	617.933	340.026	619.499	329.057	609.013	323.043	600.436	339.473	619.874	338.004	618.98	346.623	641.026	346.521	647.773	325.966	606.601	322.02	601.3	333.974	612.723	338.209	618.838	346.188	627.995	355.39	644.424	346.56	663.933	356.869	635.292	348.655	635.013	353.007	640.055
335.194	620.845	323.01	603.116	331.744	613.959	324.494	603.027	324.14	608.762	328.907	615.406	330.73	616.078	336.844	618.271	340.16	620.019	328.993	609.672	323.26	600.899	340.14	619.802	338.665	618.909	346.133	641.218	346.331	648.397	325.942	607.253	322.218	601.76	333.964	613.365	338.655	619.04	346.135	628.687	355.359	645.101	346.235	664.289	357.191	635.645	349.336	634.983	353.678	639.985
335.698	621.037	322.955	603.773	331.943	614.417	325.046	603.139	324.538	609.11	329.132	615.849	331.047	616.407	337.054	618.756	340.811	620.024	328.929	610.332	323.686	601.157	340.806	619.775	339.328	618.851	345.877	641.645	345.918	648.818	326.097	607.783	322.581	602.092	334.131	613.955	339.32	618.974	346.073	629.379	355.104	645.707	345.924	664.662	357.498	636.013	349.97	635.046	354.347	639.905
336.32	620.967	323.477	603.896	332.113	614.896	325.173	603.778	324.973	609.349	329.69	615.954	331.084	617.018	337.552	618.964	341.013	620.48	329.187	610.754	324.049	601.459	341.471	619.814	339.992	618.823	345.842	642.293	345.471	649.139	326.608	608.074	323.095	602.31	334.639	614.114	339.821	619.19	346.005	630.069	354.615	645.97	345.522	665.018	358.049	636.265	349.995	635.701	354.796	640.197
336.953	620.905	323.894	604.176	332.709	614.939	325.208	604.429	325.024	609.916	329.888	616.408	331.687	617.058	338.165	618.986	341.167	620.986	329.578	611.073	323.985	602.121	341.909	620.21	340.598	618.967	345.874	642.942	345.029	649.328	327.284	608	323.091	602.992	335.053	614.353	340.123	619.587	345.938	630.76	354.063	646.095	344.876	664.996	358.298	636.821	350.412	636.04	355.133	640.58
337.586	620.9	324.107	604.729	332.926	615.38	325.189	605.088	324.963	610.577	330.117	616.848	332.021	617.371	338.739	619.029	341.799	621.019	329.945	611.39	324.123	602.657	342.116	620.738	341.039	619.27	345.916	643.592	344.985	649.891	327.754	608.183	323.038	603.673	335.135	614.938	340.339	620.047	345.88	631.452	354.039	646.741	344.34	665.107	358.376	637.498	351.075	636.152	355.354	641.042
337.909	621.293	324.067	605.377	333.087	615.884	325.135	605.746	324.899	611.239	330.668	617.013	332.064	617.981	338.926	619.534	342.041	621.499	330.002	611.941	324.413	603.066	342.031	621.4	341.084	619.864	345.97	644.24	345.038	650.542	328.024	608.628	322.954	604.353	335.644	615.09	341.013	619.978	345.834	632.144	354.03	647.407	344.027	665.511	358.313	638.184	351.769	636.103	356.01	640.98
338.072	621.821	323.996	606.035	333.672	615.956	325.073	606.403	325.129	611.738	331.308	616.987	332.684	618.078	339.309	619.826	342.1	622.146	329.998	612.543	324.949	603.218	342.286	621.78	341.565	620.046	346.029	644.888	345.094	651.194	328.45	608.879	322.893	605.035	336.046	615.35	341.605	620.077	345.811	632.837	353.888	647.942	343.665	665.908	357.999	638.721	352.461	636.033	356.585	641.07
337.975	622.453	323.919	606.693	333.914	616.366	325.006	607.059	325.475	612.118	331.807	617.096	333.331	618.088	339.819	619.97	342.024	622.815	330.352	612.893	325.058	603.754	342.636	622.11	342.012	620.262	346.086	645.537	344.891	651.69	328.779	609.245	323.037	605.625	336.118	615.942	342.079	620.327	345.893	633.518	353.242	647.971	343.124	666.053	357.54	639.071	353.153	635.956	357.058	641.334
338.243	622.817	323.906	607.351	334.063	616.866	324.936	607.716	325.898	612.308	331.915	617.647	333.987	618.013	340.485	619.896	341.946	623.484	330.736	613.208	325.013	604.419	343.072	622.406	342.01	620.908	346.142	646.185	344.555	652.075	328.983	609.723	323.344	606.079	336.646	616.079	342.201	620.854	346.218	633.927	353.064	648.459	342.432	665.985	356.93	639.17	353.844	635.881	357.239	641.791
338.711	623.015	324.109	607.813	334.636	616.932	324.873	608.372	326.168	612.72	332.365	617.933	334.643	617.939	340.912	620.238	341.909	624.148	331.052	613.565	324.934	605.081	343.045	623.05	342.028	621.547	346.184	646.834	344.048	652.246	328.882	610.407	323.885	606.19	337.038	616.356	342.628	621.11	346.87	633.947	352.858	648.932	341.739	665.919	356.693	639.785	354.538	635.834	357.59	642.113
339.341	622.927	324.654	607.952	334.907	617.321	324.816	609.03	326.505	613.053	332.94	618.062	335.286	617.935	341.151	620.775	341.983	624.802	330.969	614.223	325.07	605.647	342.979	623.716	342.211	622.019	346.208	647.484	343.909	652.752	329.197	610.89	324.113	606.65	337.106	616.962	343.047	621.371	347.044	634.569	352.215	649.008	341.246	666.16	356.552	640.453	355.226	635.854	358.071	642.334
339.808	623.129	324.896	608.398	334.988	617.905	324.791	609.689	327.164	612.97	333.603	617.983	335.914	618.028	341.077	621.443	342.494	624.967	331.156	614.695	325.366	606.071	342.903	624.383	342.846	622.03	346.196	648.133	343.942	653.404	329.729	611.172	324.399	607.034	337.704	617	342.995	622.046	347.086	635.237	351.547	648.996	340.88	666.546	356.487	641.141	355.908	635.954	357.997	643.003
340.135	623.575	325.001	608.95	334.954	618.552	324.862	610.332	327.688	613.13	334.268	617.945	336.004	618.596	340.989	622.11	342.934	625.189	331.494	615.055	325.919	606.179	343.212	624.819	343.03	622.527	345.976	648.666	344.018	654.054	330.42	611.137	325.075	606.957	338.353	617.009	343.093	622.643	347.023	635.928	351.096	649.199	340.608	666.912	356.489	641.831	355.967	636.594	358.081	643.591
340.083	624.207	324.941	609.607	335.272	618.914	325.027	610.937	328.089	613.426	334.778	618.087	336.274	618.972	341.04	622.664	342.974	625.808	331.912	615.32	326.004	606.707	343.586	625.151	343.037	623.181	345.634	649.076	344.082	654.705	331.106	611.049	325.689	607.067	338.988	617.068	343.367	623.077	346.945	636.618	351.023	649.807	340.005	666.912	356.541	642.519	356.336	636.902	358.326	644.065
340.016	624.842	325.356	609.867	335.836	619.064	325.632	610.982	328.26	613.887	334.948	618.607	336.901	618.985	341.481	622.918	343.495	625.927	332.007	615.841	325.996	607.343	344.012	625.373	342.951	623.84	345.099	649.186	344.104	655.339	331.793	610.961	326.041	607.414	339.053	617.658	343.959	623.162	346.881	637.309	350.48	649.909	339.353	666.965	356.656	643.191	356.89	637.02	358.989	643.959
339.941	625.477	325.752	610.147	336.487	618.982	325.929	611.32	328.691	614.139	335.369	618.887	337.548	618.981	341.846	623.28	343.971	626.151	331.983	616.466	326.142	607.913	344.255	625.764	342.978	624.483	344.919	649.664	343.849	655.839	332.481	610.89	325.977	608.092	339.339	618.027	344.019	623.729	346.848	637.999	349.85	649.925	338.759	667.272	356.937	643.796	356.999	637.655	359.623	644.023
340.27	625.803	325.937	610.608	336.848	619.245	325.948	611.922	329.07	614.44	335.906	619.015	337.965	619.21	342.066	623.755	344.166	626.773	332.279	616.892	326.61	608.109	344.626	626.086	343.182	624.97	344.914	650.31	343.44	656.122	332.857	611.284	326.07	608.704	339.973	618.052	344.022	624.372	346.905	638.683	349.173	649.898	338.464	667.886	357.479	643.99	356.954	638.326	360.194	644.25
340.648	626.097	326.358	610.844	336.991	619.767	325.941	612.576	329.038	615.099	336.569	618.936	337.978	619.845	341.995	624.423	344.167	627.438	332.651	617.185	327.049	608.32	345.139	626.329	343.803	625.008	344.984	650.957	342.949	656.276	333.193	611.664	326.435	609.026	340.032	618.652	344.143	624.95	347.391	638.919	348.917	650.489	338.266	668.547	357.965	644.185	356.878	639.01	360.431	644.865
340.973	626.444	326.742	611.118	337.508	619.893	326.243	612.958	328.966	615.759	336.84	619.331	338.513	619.972	341.937	625.092	344.121	628.11	333.043	617.431	327.138	608.887	345.187	626.994	343.981	625.488	345.054	651.604	343.002	656.925	333.508	612.013	327.107	609.011	340.339	619.009	344.681	625.091	347.844	639.168	348.827	651.133	338.147	669.231	357.994	644.855	356.922	639.688	360.51	645.515
341	627	326.932	611.581	337.831	620.223	326.859	613.066	328.955	616.39	337.116	619.746	338.944	620.203	342.034	625.65	344.052	628.78	333.275	617.868	327.609	609.083	345.19	627.662	344.154	625.964	345.122	652.251	342.939	657.507	333.875	612.351	327.748	609.071	340.967	619.048	345.046	625.408	347.946	639.743	348.887	651.813	338.121	669.926	358.004	645.534	357.405	640.014	360.453	646.171
340.992	627.579	327.336	611.83	337.972	620.744	327.506	613	329.176	616.933	337.571	620	338.993	620.815	342.45	625.978	343.977	629.449	333.616	618.169	328.024	609.323	345.151	628.331	344.784	625.966	345.154	652.9	342.773	658.027	334.214	612.695	328.059	609.444	341.028	619.66	345.066	626.077	348.473	639.91	348.986	652.489	338.149	670.62	358.248	645.97	358.029	640.133	360.136	646.744
341.366	627.873	327.72	612.101	338.474	620.887	327.891	613.233	329.608	617.156	338.2	619.983	339.504	620.95	342.788	626.3	343.909	630.119	334.003	618.421	327.988	609.981	345.087	628.999	345.09	626.424	345.051	653.497	342.206	658.133	334.555	613.039	328.139	610.035	341.358	620.004	344.99	626.751	348.854	640.221	349.053	653.168	338.231	671.309	358.898	645.992	358.718	640.042	359.604	646.987
341.733	628.186	327.93	612.55	338.824	621.201	327.975	613.813	330.027	617.376	338.719	620.091	340.127	620.969	343.116	626.62	343.855	630.79	334.234	618.921	328.048	610.605	345.022	629.666	345.24	627.053	344.832	654.047	341.887	658.492	334.975	613.372	328.778	610.066	341.987	620.051	344.994	627.404	348.974	640.79	349.019	653.778	338.403	671.981	359.218	646.544	359.407	639.972	358.959	647.039
342.078	628.524	328.32	612.82	339.011	621.702	328.515	613.922	330.164	617.945	338.952	620.552	340.778	620.959	343.452	626.935	343.903	631.456	334.729	619.125	328.28	611.059	344.956	630.334	345.25	627.717	344.266	654.116	341.852	659.143	335.024	613.967	329.039	610.477	342.024	620.686	345.098	628.03	349.533	640.914	348.456	653.918	338.723	672.585	359.383	647.183	359.84	640.213	358.295	646.971
342.011	629.159	328.702	613.099	338.942	622.348	328.879	614.213	330.687	618.123	339.343	620.845	340.991	621.442	343.842	627.265	344.188	631.873	335.389	619.134	328.89	611.095	344.918	631.003	345.225	628.382	343.931	654.423	341.901	659.795	334.945	614.654	329.175	611.008	342.373	621.006	345.733	628.057	349.863	641.279	348.134	654.309	339.189	673.006	359.403	647.87	360.034	640.741	358.045	647.391
342.129	629.631	328.928	613.533	339.125	622.813	328.984	614.774	331.348	618.138	339.847	620.984	341.043	622.064	344.062	627.725	344.773	631.963	336.049	619.064	329.06	611.578	345.043	631.568	345.183	629.045	343.861	655.002	341.964	660.446	334.872	615.342	329.851	610.974	343	621.043	346.097	628.414	350.055	641.782	347.988	654.859	339.866	673.089	359.228	648.533	360.543	640.883	357.996	648.025
342.448	629.921	329.309	613.81	339.639	623.044	328.948	615.42	332.01	618.075	340.508	620.894	340.975	622.712	343.99	628.393	344.991	632.489	336.708	618.984	329.265	612.029	345.321	632.028	345.126	629.708	343.321	655.099	342.038	661.096	335.18	615.84	330.502	611.009	343.005	621.697	346.201	629.08	350.597	641.88	348.05	655.538	340.543	673.014	358.792	648.884	360.977	641.246	358.032	648.688
342.935	630.2	329.69	614.087	340.279	622.981	329.148	615.883	332.671	618	340.89	621.271	341.411	622.921	344.269	628.756	345.065	633.094	337.366	618.897	329.874	612.076	345.892	632.167	345.066	630.371	342.948	655.362	342.106	661.747	335.68	616.068	330.987	611.218	343.362	621.995	346.182	629.759	351.057	642.259	347.68	655.854	340.929	673.259	358.24	649.07	361.287	641.779	357.599	648.922
343.327	630.594	329.92	614.513	340.771	623.12	329.714	616.065	333.332	617.925	341.072	621.803	341.875	623.12	344.67	629.065	344.992	633.764	338.025	618.817	330.047	612.567	346.283	632.572	345.004	631.033	342.885	655.937	342.16	662.398	336.362	615.952	330.995	611.872	343.987	622.025	346.141	630.437	351.418	642.811	347.253	656.126	340.962	673.921	358.096	649.585	361.245	642.467	357.131	649.13
343.517	631.202	330.289	614.798	341.03	623.59	330.356	616	333.995	617.867	340.982	622.464	341.959	623.696	345.19	629.35	344.96	634.433	338.685	618.753	330.264	613.018	346.523	633.191	344.945	631.696	342.329	655.941	342.187	663.051	336.851	616.225	331.004	612.537	343.989	622.682	346.085	631.114	351.581	643.484	347.064	656.606	340.967	674.601	357.676	649.853	360.821	642.814	357.055	649.708
343.638	631.829	330.668	615.073	340.969	624.22	330.81	616.14	334.603	617.994	341.303	622.796	342.397	623.902	345.424	629.957	345.21	634.833	339.347	618.707	330.884	613.071	346.656	633.848	344.9	632.359	341.704	655.921	342.015	663.64	337.039	616.721	331.226	612.996	344.354	622.978	346.019	631.791	351.671	644.171	346.628	656.848	341.332	674.954	357.234	650.102	360.326	643.096	356.592	649.967
343.731	632.462	330.912	615.484	341.072	624.739	330.935	616.673	335.072	618.279	341.686	623.108	342.875	624.084	345.59	630.605	345.75	634.957	340.009	618.728	331.041	613.584	346.766	634.509	344.882	633.022	341.109	656.054	341.694	664.061	336.984	617.391	331.885	613.029	344.952	623.045	345.953	632.467	351.723	644.863	346.242	657.143	341.966	675.044	357.092	650.618	359.963	643.487	355.988	650.058
343.785	633.099	331.27	615.782	341.53	625.033	331.395	616.913	335.122	618.875	342.056	623.481	343.05	624.646	345.701	631.267	346.143	635.429	340.596	618.92	331.253	614.036	346.856	635.173	344.939	633.681	340.864	656.563	341.119	664.115	337.243	617.872	332.549	613.008	345.01	623.688	345.889	633.144	351.739	645.557	346.042	657.626	342.656	674.973	356.643	650.927	359.963	644.141	355.32	649.971
343.822	633.738	331.645	616.065	342.152	625.001	331.957	617.017	335.61	619.009	342.045	624.106	343.047	625.274	345.774	631.936	346.391	636	341.092	619.26	331.893	614.049	346.927	635.84	345.378	633.905	340.761	657.184	340.946	664.595	337.629	618.172	332.957	613.256	345.021	624.341	345.835	633.822	351.712	646.25	345.601	657.833	342.914	675.393	356.06	651.063	360.028	644.834	354.649	649.935
343.846	634.377	331.908	616.464	342.686	625.077	332.612	616.952	336.256	618.993	341.976	624.771	342.977	625.93	345.832	632.606	346.503	636.662	341.099	619.906	332.034	614.557	346.98	636.508	345.917	634.058	340.798	657.833	340.752	665.069	338.04	618.429	332.998	613.901	345.066	624.936	345.808	634.5	351.653	646.94	345.205	658.14	343.141	675.859	355.374	650.98	360.11	645.525	354.155	650.106
343.85	635.017	332.262	616.772	342.981	625.493	332.858	617.363	336.846	619.092	341.907	625.435	342.938	626.587	345.877	633.277	346.529	637.334	341.133	620.496	332.232	615.009	347.021	637.178	346.273	634.582	340.867	658.48	340.104	665.106	338.248	618.957	333.605	613.979	345.678	624.973	345.828	635.174	351.561	647.627	344.906	658.624	343.746	675.925	354.686	650.935	360.126	646.218	354.03	650.685
343.843	635.657	332.632	617.062	343.317	625.744	333.121	617.779	337.06	619.545	342.247	625.806	343.306	626.858	345.891	633.949	346.516	638.006	341.218	621.017	332.864	615.031	347.053	637.848	346.486	635.192	340.951	659.125	339.454	665.062	338.814	619.058	333.956	614.317	346.039	625.357	345.972	635.828	351.377	648.295	344.966	659.297	343.969	676.456	354.214	651.152	359.89	646.729	353.563	650.86
343.827	636.296	332.902	617.45	343.702	626.002	333.603	617.997	337.245	620.012	342.636	626.129	343.816	627.02	345.898	634.622	346.465	638.676	341.809	621.108	333.03	615.556	347.077	638.518	346.63	635.84	341.044	659.769	338.805	664.985	339.501	619.002	334.01	614.954	346.216	625.967	346.502	635.985	350.99	648.78	345.029	659.977	344.034	677.104	353.987	651.661	359.467	647.087	353.146	651.125
343.778	636.935	333.247	617.761	344.186	626.369	334.223	617.977	337.897	619.988	343.013	626.441	344.06	627.559	345.897	635.294	346.311	639.328	342.102	621.51	333.038	616.209	347.093	639.189	346.725	636.498	341.13	660.414	338.155	664.912	340.188	618.913	333.982	615.633	346.218	626.638	346.984	636.171	350.488	649.121	345.06	660.638	343.974	677.795	353.536	651.878	359.117	647.39	352.932	651.684
343.714	637.571	333.612	618.052	344.46	626.932	334.744	618.061	338.537	620.024	342.99	627.064	344.117	628.176	345.883	635.967	345.947	639.751	342.147	622.168	332.947	616.871	347.097	639.859	346.799	637.159	341.206	661.06	337.532	664.958	340.749	619.116	334.339	615.942	346.191	627.309	347.032	636.831	350.14	649.373	344.589	660.879	344.531	677.917	353.216	652.239	358.779	647.735	352.98	652.34
343.629	638.205	333.89	618.424	344.65	627.559	334.929	618.555	339.046	620.202	343.076	627.61	344.071	628.834	345.855	636.639	345.442	640.017	342.087	622.828	332.98	617.517	347.096	640.53	346.859	637.821	341.236	661.709	336.995	665.13	341.122	619.477	334.908	616.048	346.146	627.98	346.972	637.503	349.811	649.753	344.198	661.223	344.998	678.242	352.964	652.677	358.436	648.087	353.043	653.009
343.492	638.829	334.226	618.748	344.772	628.206	335.319	618.841	339.058	620.837	343.42	627.969	344	629.491	345.812	637.31	345.028	640.349	342.015	623.488	333.216	617.972	347.089	641.201	346.899	638.485	341.171	662.345	336.964	665.738	341.262	619.993	334.945	616.681	346.087	628.65	346.934	638.172	349.393	650.047	343.914	661.671	345.34	678.776	352.509	652.903	358.067	648.401	353.072	653.679
343.287	639.412	334.579	619.054	344.868	628.857	335.822	618.99	339.522	620.977	343.838	628.263	343.961	630.148	345.749	637.98	344.852	640.889	341.936	624.147	333.842	618.005	347.067	641.871	346.925	639.15	341.018	662.957	336.586	666.011	341.805	620.169	335.377	616.929	346.022	629.319	346.984	638.831	348.705	649.959	343.998	662.35	345.399	679.467	352.204	653.281	357.745	648.773	352.59	653.896
342.931	639.899	334.845	619.406	344.949	629.51	336.476	618.921	340.173	620.934	344.066	628.699	343.996	630.749	345.671	638.647	344.833	641.561	341.882	624.808	333.975	618.522	347.041	642.541	346.942	639.815	340.404	663.076	336.011	666.095	342.033	620.612	335.9	617.092	345.955	629.988	347.533	638.964	348.223	650.205	344.087	663.028	345.324	680.149	351.921	653.683	357.415	649.127	352.213	654.204
342.432	640.083	335.177	619.787	345.014	630.165	336.87	619.249	340.794	621.014	343.99	629.363	344.504	630.882	345.577	639.313	344.863	642.233	341.938	625.441	334.186	618.97	347.008	643.211	346.95	640.48	339.78	663.086	335.976	666.717	341.993	621.287	335.963	617.718	345.893	630.657	347.927	639.244	347.861	650.553	344.164	663.706	345.084	680.724	351.48	653.932	357.05	649.428	352.041	654.687
341.968	640.243	335.582	620.134	345.063	630.821	337.082	619.758	341.056	621.48	344.247	629.739	344.961	631.196	345.426	639.967	344.906	642.905	342.103	626.037	334.82	619.022	346.955	643.88	346.944	641.145	339.145	662.983	335.623	667.008	342.164	621.839	336.435	617.935	345.84	631.327	347.982	639.859	347.622	650.954	344.179	664.388	344.521	680.961	351.194	654.326	356.734	649.87	351.56	654.878
341.961	640.875	336.242	620.119	345.102	631.479	336.982	620.41	341.122	622.12	344.643	630.048	345.363	631.65	345.167	640.564	344.957	643.577	342.716	626.063	335.469	619.005	346.89	644.547	346.929	641.81	339.058	663.537	335.005	667.024	342.594	622.112	336.894	618.157	345.797	631.998	348.558	639.938	347.132	651.224	343.837	664.858	344.17	681.33	350.885	654.716	356.232	650.07	351.212	655.2
342.002	641.51	336.9	620.066	345.128	632.137	337.248	620.779	341.024	622.778	345.187	630.305	345.549	632.281	344.801	641.076	345.015	644.247	343.001	626.412	335.929	619.178	346.816	645.214	346.9	642.475	338.781	663.916	334.876	667.647	343.039	622.345	336.956	618.758	345.782	632.67	348.954	640.242	346.888	651.702	343.311	665.115	344.011	681.837	350.448	655.026	355.541	650.014	351.035	655.691
342.074	642.146	337.557	619.988	345.148	632.795	337.64	621.058	341.005	623.426	345.436	630.901	345.7	632.922	344.173	641.1	345.073	644.918	342.977	627.068	335.977	619.79	346.722	645.878	346.861	643.139	338.204	664.009	334.824	668.285	342.978	623.029	337.458	619.008	345.844	633.334	349.093	640.859	346.909	652.392	342.638	665.003	344.094	682.529	349.789	654.976	354.852	649.912	350.555	655.876
342.143	642.782	338.214	619.91	345.162	633.453	337.932	621.444	341.133	623.957	345.62	631.541	345.822	633.571	343.821	641.493	345.131	645.589	343.038	627.694	336.483	620.014	346.591	646.535	346.811	643.802	337.566	663.972	334.854	668.938	343.078	623.646	338.087	619.094	346.053	633.865	349.007	641.532	346.994	653.081	342.222	665.259	343.679	682.874	349.279	655.125	354.161	649.853	350.215	656.205
342.192	643.419	338.873	619.87	345.159	634.111	337.97	622.012	341.749	623.999	345.754	632.195	345.907	634.226	343.678	642.143	345.183	646.261	343.384	628.02	337.108	620.085	346.413	647.175	346.739	644.463	337.119	664.14	334.921	669.588	343.365	624.081	338.768	619.023	346.649	633.957	348.96	642.204	347.067	653.771	341.878	665.605	343.317	683.211	348.982	655.566	353.505	649.892	350.017	656.679
342.219	644.058	339.511	619.889	345.151	634.77	337.971	622.616	341.972	624.436	345.845	632.857	345.98	634.882	343.69	642.814	345.227	646.932	344.014	628.047	337.772	620.014	346.106	647.755	346.638	645.12	337.05	664.725	334.994	670.239	343.953	624.168	339.448	618.94	346.913	634.389	348.98	642.847	347.067	654.426	341.555	665.952	343.044	683.575	348.61	655.832	353.009	650.255	349.55	656.87
342.04	644.637	339.894	620.277	345.139	635.428	338.382	622.972	342.001	625.064	345.92	633.521	346.042	635.539	343.829	643.449	345.262	647.605	344.026	628.681	338.435	619.936	345.58	647.951	346.51	645.772	336.58	664.907	335.073	670.888	344.116	624.691	340.128	618.902	347.009	634.967	349.572	642.935	346.765	654.919	341.181	666.283	342.685	684.087	348.235	656.172	352.936	650.859	349.194	657.209
[truncated: 3,120 more rows]
[truncated: 650 more columns]

## Sheet: Fig 5C Con(cKO)+Yoda1 Boundary
X	Y	X	Y	X	Y	X	Y	X	Y	X	Y	X	Y	X	Y	X	Y	X	Y	X	Y	X	Y	X	Y	X	Y	X	Y	X	Y	X	Y	X	Y	X	Y	X	Y	X	Y	X	Y	X	Y	X	Y	X	Y
[truncated: 4,004 more rows]
[truncated: 650 more columns]

## Sheet: Fig 5C Piezo1-cKO+DMSO Boundary
Outlines for cell boundaries as detected by ADAPT software (Barry et al 2015) for segmented DMSO treated Piezo1-cKO keratinocytes as seen in Fig. 5C
[truncated: 4,651 more rows]
[truncated: 650 more columns]
