# Supplementary material for: Spatiotemporal dynamics of PIEZO1 localization controls keratinocyte migration during wound healing
Source: eLife. 2021 Sep 27;10:e65415. doi: 10.7554/eLife.65415 (PMC8577841; doi:10.7554/eLife.65415)
Supplement: Figure 5—source data 3. — (Sheets 1–5) Data used to create representative heatmaps corresponding to the cells shown in Figure 5E illustrating cell edge velocities along segmented cell boundaries from time-lapse series. [file elife-65415-fig5-data3.xlsx]

## Sheet: Fig 5C Control(GoF) Boundaries
X	Y	X	Y	X	Y	X	Y	X	Y	X	Y	X	Y	X	Y	X	Y	X	Y	X	Y	X	Y	X	Y	X	Y	X	Y	X	Y	X	Y	X	Y	X	Y	X	Y	X	Y	X	Y	X	Y	X	Y	X	Y
848	576	852	577	860	576	859	577	858	577	851	578	852	578	858	576	860	575	859	575	857	575	859	575	857	575	855	575	851	576	851	575	858	574	853	574	858	575	858	575	860	573	859	572	858	573	861	570	860	570
847.516	576.005	851.491	576.994	859.435	576.017	858.446	577.127	857.453	577.097	850.474	578.019	851.48	578.01	857.461	576.083	859.464	575.005	858.458	575.007	856.461	575.1	858.445	575.01	856.456	575.01	854.473	574.98	850.486	576.003	850.476	575.004	857.444	574.106	852.43	573.965	857.445	575.034	857.424	575.036	859.428	573.008	858.442	572.009	857.405	573.01	860.397	570.007	859.348	570.005
847.014	576.24	850.736	576.988	858.621	576.013	857.636	577.218	856.654	577.154	849.7	577.997	851.001	578.31	856.671	576.122	859.006	575.336	858.001	575.343	855.67	575.164	857.998	575.371	855.999	575.353	853.7	574.969	849.954	576.293	849.943	575.315	856.635	574.169	851.617	573.955	856.642	575.031	856.599	575.025	859.005	573.412	858.004	572.386	857.002	573.461	860.047	570.48	859.001	570.563
846.986	576.951	850.027	577.029	858.018	576.2	856.812	577.198	855.845	577.105	848.925	577.92	850.889	578.972	855.872	576.052	858.856	575.975	857.84	575.979	854.867	575.121	857.795	575.986	855.821	575.968	853.022	575.082	849.79	577.028	849.766	576.058	855.814	574.123	851.009	574.203	856.027	575.181	856.028	575.238	858.742	573.979	857.779	572.977	856.668	573.982	860.051	571.321	858.527	570.992
846.3	577.005	850.015	577.777	857.961	576.963	855.989	577.138	855.037	577.024	848.157	577.98	850.171	579.026	855.075	575.957	858.106	576.017	857.09	576.07	854.066	575.045	857.037	576.121	855.066	576.001	852.959	575.838	849.799	577.805	849.76	576.847	854.995	574.044	850.928	575.001	855.982	575.951	855.915	575.961	858.041	574.108	857.046	573.059	856.038	574.204	859.803	571.974	858.025	571.392
846.016	577.46	849.461	577.989	857.203	577.18	855.167	577.058	854.229	576.94	848.007	578.62	849.999	579.624	854.276	575.882	858	576.682	856.301	575.981	853.266	574.958	856.229	576.037	854.287	576.014	853.001	576.612	849.848	578.581	849.801	577.636	854.176	573.955	851.022	575.821	855.214	576.001	855.114	576.01	857.983	574.87	856.987	573.808	855.932	574.945	858.977	572.051	858.001	572.264
845.775	577.959	848.714	577.993	856.39	577.215	854.346	576.974	853.42	576.879	847.583	578.972	849.58	579.976	853.499	575.937	857.512	577.071	855.516	575.977	852.465	574.875	855.42	575.946	854.013	576.532	852.592	576.962	849.916	579.356	849.864	578.424	853.358	573.871	850.348	575.95	854.414	575.993	854.284	575.975	857.267	574.999	856.342	573.985	855.124	575.061	858.116	571.971	857.798	572.953
845.092	578.016	848.053	578.064	855.568	577.182	853.523	576.899	852.617	576.908	847.053	579.215	849.034	580.203	853.066	576.338	856.761	577.188	855.044	576.313	851.663	574.814	854.625	575.942	853.648	576.96	852.06	577.216	849.993	580.13	849.939	579.21	852.537	573.813	849.949	576.463	854.039	576.42	854.04	576.557	856.465	575.015	855.557	574.01	854.275	574.971	858.026	572.753	857.067	573.129
845.006	578.674	848.025	578.801	854.748	577.12	852.7	576.844	852.048	577.209	846.982	579.922	849.01	580.957	852.872	576.928	855.967	577.152	854.866	576.924	850.868	574.824	854.076	576.228	853.059	577.165	851.976	577.911	850.072	580.905	850.017	579.997	851.729	573.857	849.869	577.261	853.741	576.936	853.596	576.959	856.039	575.4	855.048	574.303	853.438	574.973	857.371	572.961	856.952	573.917
844.556	578.917	847.431	578.976	853.928	577.042	851.878	576.843	851.947	577.92	846.282	579.977	848.264	580.995	852.103	576.953	855.175	577.076	854.137	577	850.104	574.991	853.971	576.925	853.011	577.914	851.276	577.978	850.138	581.68	850.092	580.784	851.081	574.134	849.934	578.085	852.993	577.001	852.799	576.991	855.753	575.955	854.87	574.935	853.059	575.453	857.053	573.506	856.127	573.995
843.856	578.915	846.693	578.984	853.108	576.961	851.072	576.959	851.218	578.089	845.929	580.511	848.003	581.514	851.324	576.96	854.385	576.987	853.357	576.995	850.04	575.715	853.197	576.989	852.262	577.967	851.035	578.531	850.177	582.456	850.158	581.571	851.01	574.873	850.028	578.906	852.187	576.981	852.091	577.08	854.974	576.051	854.104	574.986	852.689	575.941	856.613	573.926	856.016	574.787
843.143	578.993	846.08	579.104	852.289	576.885	851.027	577.741	850.421	578.059	845.826	581.253	847.695	581.979	851.003	577.495	853.594	576.903	853.052	577.471	849.459	575.934	852.396	576.964	852.023	578.535	850.997	579.267	850.152	583.229	850.202	582.36	850.281	574.959	850.109	579.729	852.033	577.64	852.021	577.86	854.146	575.944	854.038	575.738	852.06	576.179	856.099	574.27	855.295	574.972
842.713	579.55	846.021	579.82	851.468	576.817	850.428	578.039	849.614	577.977	845.875	582.034	847.055	582.107	850.972	578.258	852.802	576.838	852.708	577.927	849.056	576.344	852.058	577.432	851.653	578.971	850.872	579.892	849.977	583.915	850.175	583.141	850.058	575.559	850.063	580.541	851.52	577.933	851.289	577.96	853.334	575.971	853.444	575.969	851.941	576.925	855.849	574.878	855.049	575.62
842.474	580.226	845.395	579.948	850.646	576.778	849.639	578.071	848.806	577.896	845.959	582.811	846.99	582.83	850.876	578.882	852.011	576.814	851.98	578.009	848.822	576.919	851.726	577.922	851.05	579.168	850.181	579.976	849.247	583.969	850.006	583.878	849.609	575.921	849.596	580.909	851.098	578.313	851.054	578.558	853.065	576.53	853.034	576.383	851.15	576.99	855.141	575.03	854.464	576.003
842.382	580.964	845.04	580.378	849.834	576.818	848.817	577.994	847.998	577.851	846.047	583.589	846.986	583.583	850.143	578.949	851.238	576.925	851.195	577.982	848.101	576.979	851.096	578.105	850.991	579.905	850.065	580.634	849.005	584.548	849.304	583.941	849.008	576.195	849.075	581.247	850.86	578.881	850.588	578.924	852.625	576.921	852.782	576.951	851.021	577.713	855.056	575.797	853.594	576.01
842.377	581.709	844.968	581.082	849.128	577.045	847.997	577.905	847.194	577.922	846.119	584.367	846.606	583.957	850.013	579.669	851.047	577.56	851.053	578.621	847.792	577.678	851.013	578.834	850.286	579.985	849.563	580.907	848.989	585.282	849.019	584.503	848.768	576.956	848.914	581.987	850.128	578.964	850.103	579.268	852.081	577.215	852.073	577.058	850.417	577.957	854.326	575.996	852.693	575.955
842.456	582.449	845.031	581.842	849.035	577.776	847.174	577.838	847.034	578.608	846.129	585.14	846.055	584.188	850.033	580.449	850.599	577.906	850.556	578.937	847.668	578.456	850.343	578.957	850.026	580.54	849.072	581.222	849.057	586.055	848.987	585.252	848.751	577.777	848.998	582.81	850.048	579.714	849.873	579.865	851.931	577.907	852.006	577.803	850.068	578.458	853.486	575.981	852.109	576.277
842.626	583.167	844.373	581.944	848.374	577.958	846.366	577.913	846.537	578.917	846.002	585.86	845.912	584.903	849.708	580.9	850.108	578.203	849.819	578.994	847.635	579.259	850.039	579.488	849.99	581.299	848.963	581.952	849.056	586.828	849.057	586.036	848.789	578.598	849.088	583.632	849.448	579.93	849.166	579.983	851.159	577.975	851.364	577.971	849.673	578.911	853.106	576.433	851.793	576.867
842.946	583.75	843.931	582.386	847.586	577.955	846.067	578.477	846.11	579.288	845.309	585.943	845.997	585.675	849.134	581.146	849.966	578.861	849.144	579.077	847.644	580.064	849.99	580.243	849.836	581.911	849.041	582.732	848.385	586.942	849.056	586.815	848.849	579.419	849.1	584.455	849.049	580.376	849.051	580.697	851.039	578.683	851.055	578.473	849.075	579.179	852.688	576.905	851.139	577.118
843.565	583.921	843.759	583.051	847.105	578.28	845.642	578.883	845.866	579.844	845.044	586.499	846.024	586.441	849.029	581.844	849.276	578.952	849.039	579.765	847.675	580.868	849.851	580.867	849.115	581.972	848.455	582.906	848.041	587.421	848.379	586.922	848.923	580.239	848.685	584.892	848.984	581.135	848.445	580.909	850.475	578.943	850.694	578.925	848.989	579.991	851.895	576.996	850.955	577.85
844.067	584.346	843.893	583.765	846.836	578.856	845.125	579.188	845.197	579.943	845.007	587.233	845.73	586.905	848.33	581.95	849.03	579.531	848.405	579.907	847.717	581.672	849.168	580.975	848.997	582.707	847.991	583.321	847.966	588.123	848.036	587.432	849.005	581.058	848.157	585.216	848.958	581.862	848.064	581.402	849.689	578.966	850.078	579.126	849.049	580.84	851.168	577.081	850.159	577.97
844.38	584.949	844.543	583.905	846.164	579.003	844.934	579.837	844.918	580.625	844.903	587.849	845.077	587.03	848.072	582.495	849.001	580.275	848.051	580.4	847.773	582.474	848.955	581.676	849.004	583.484	847.797	584.038	848.05	588.896	847.969	588.162	849.086	581.877	848.032	585.905	848.234	581.953	847.992	582.174	849.083	579.197	850.034	579.908	848.291	580.955	851	577.797	850.048	578.776
844.531	585.677	845.054	584.325	846.032	579.707	844.25	579.942	844.902	581.404	844.208	587.915	844.819	587.738	847.674	582.885	848.837	580.858	847.978	581.14	847.833	583.277	848.986	582.461	848.665	583.903	847.793	584.821	848.062	589.669	848.056	588.947	849.16	582.697	848.101	586.727	847.963	582.588	847.876	582.831	848.941	579.944	849.266	579.966	848.06	581.59	850.284	577.925	849.3	578.945
844.624	586.417	845.393	584.94	845.448	579.908	843.777	580.519	844.984	582.212	843.882	588.557	844.762	588.504	847.122	583.141	848.18	581.001	847.944	581.821	847.896	584.079	849.045	583.268	848.052	584.119	847.844	585.604	847.518	589.916	848.087	589.735	849.223	583.518	847.447	587.022	847.945	583.363	847.198	582.974	849.032	580.77	849.039	580.562	847.539	581.932	850.02	578.593	849.064	579.624
844.675	587.16	845.561	585.684	844.967	580.359	843.525	581.271	845.056	583.019	843.762	589.302	844.771	589.282	846.896	583.812	847.993	581.658	847.265	581.9	847.963	584.882	848.831	583.841	847.794	584.848	847.91	586.385	847.121	590.315	847.462	589.927	849.251	584.34	846.661	587.003	848.034	584.175	846.956	583.678	848.372	580.938	848.604	580.946	847.085	582.337	850.037	579.423	848.452	579.927
844.697	587.905	845.664	586.441	844.729	581.087	843.407	582.086	845.031	583.784	843.757	590.082	844.81	590.059	846.982	584.61	848.009	582.42	846.892	582.517	848.029	585.684	848.18	584.014	847.794	585.649	847.986	587.166	847	590.969	847.115	590.386	849.205	585.155	846.17	587.278	848.102	584.985	847.011	584.491	848.054	581.482	848.078	581.234	846.784	582.886	849.646	579.882	848.083	580.471
844.695	588.65	845.729	587.203	844.689	581.909	843.353	582.909	844.352	583.925	843.791	590.863	844.864	590.836	847.03	585.406	847.693	582.853	846.751	583.271	848.095	586.486	847.905	584.69	847.835	586.449	848.065	587.947	847.062	591.742	847.043	591.08	848.965	585.839	845.849	587.804	848.062	585.791	847.064	585.322	848.005	582.246	847.925	581.892	846.136	583.085	849.167	580.283	847.605	580.904
844.662	589.394	845.764	587.966	844.707	582.732	843.344	583.734	843.952	584.471	843.846	591.644	844.934	591.611	846.706	585.844	847.124	583.115	846.742	584.068	848.158	587.288	847.936	585.483	847.899	587.249	848.139	588.728	846.451	591.94	847.029	591.804	848.251	586.005	845.201	588.025	847.386	585.949	846.755	585.85	847.809	582.84	847.206	581.971	845.974	583.824	848.848	580.837	847.111	581.318
844.586	590.135	845.774	588.731	844.756	583.553	843.389	584.558	843.807	585.209	843.913	592.423	845.004	592.386	846.134	586.108	846.789	583.746	846.775	584.866	848.216	588.091	848.022	586.292	847.975	588.047	848.198	589.51	846.146	592.397	846.359	592.054	848.077	586.627	844.38	587.926	847.116	586.482	846.21	586.163	847.197	583.072	847.016	582.635	846.026	584.672	848.119	581.024	846.757	581.869
844.453	590.864	845.761	589.495	844.814	584.375	843.485	585.378	843.816	586.019	843.984	593.202	845.074	593.162	845.766	586.745	846.758	584.539	846.827	585.663	848.268	588.894	848.075	587.101	848.057	588.845	848.231	590.293	845.808	592.854	845.595	591.993	847.53	586.905	844.082	588.486	846.681	586.861	845.982	586.757	846.985	583.728	847.003	583.417	845.438	584.919	847.255	580.923	846.152	582.167
844.219	591.542	845.718	590.258	844.882	585.195	843.654	586.183	843.865	586.829	844.057	593.981	845.143	593.937	845.731	587.547	846.774	585.333	846.894	586.459	848.305	589.698	847.949	587.789	848.132	589.644	848.199	591.07	845.19	593.087	845.164	592.303	847.141	587.335	843.614	588.836	846.187	587.19	845.33	586.95	847.039	584.547	846.699	583.895	845.086	585.441	847.045	581.625	845.902	582.82
843.717	591.996	845.641	591.018	844.955	586.015	844.049	586.767	843.935	587.638	844.129	594.759	845.2	594.714	845.749	588.349	846.819	586.127	846.965	587.255	848.331	590.502	847.29	587.959	848.193	590.444	848.029	591.783	844.417	592.998	844.851	592.802	846.823	587.844	843.165	589.234	845.985	587.799	845.087	587.548	846.558	584.899	846.121	584.133	845.03	586.228	846.458	581.893	845.198	583.002
843.25	592.258	845.514	591.77	845.03	586.835	844.687	587.078	844.014	588.447	844.19	595.539	845.242	595.491	845.791	589.15	846.882	586.92	847.037	588.05	848.323	591.307	846.961	588.548	848.23	591.245	847.39	591.977	843.644	592.948	844.243	593.033	846.15	588.026	842.969	589.895	845.324	588.062	844.575	587.877	846.159	585.33	845.986	584.863	844.82	586.861	846.07	582.423	844.922	583.743
842.877	592.603	845.312	592.506	845.105	587.655	845.256	587.493	844.09	589.255	844.236	596.32	845.26	596.268	845.846	589.951	846.955	587.711	847.108	588.846	848.252	592.105	846.914	589.304	848.205	592.04	847.131	592.471	843.179	593.253	843.459	592.94	845.333	587.951	843.035	590.684	844.531	588.002	844.159	588.302	845.81	585.796	846.035	585.67	844.082	587.024	846.003	583.202	845.022	584.644
842.573	593.059	844.763	592.949	845.172	588.476	845.445	588.292	844.158	590.064	844.261	597.101	845.22	597.039	845.909	590.751	847.028	588.503	847.174	589.642	848.033	592.81	846.986	590.114	848.055	592.803	846.721	592.84	842.878	593.757	843.118	593.4	845.074	588.53	842.437	590.932	843.719	587.941	843.82	588.803	845.252	586.065	845.474	585.919	843.246	586.942	845.795	583.807	845.062	585.549
842.083	593.304	844.289	593.259	845.234	589.297	845.545	589.109	844.212	590.874	844.244	597.879	845.075	597.794	845.982	591.551	847.101	589.295	847.22	590.439	847.338	592.991	847.074	590.922	847.385	592.968	846.24	593.149	842.338	594.033	842.721	593.807	844.594	588.868	842.064	591.443	843.168	588.204	843.235	589.055	845.04	586.684	845.112	586.38	842.966	587.628	845.218	584.129	844.505	585.915
841.789	593.754	843.897	593.583	845.281	590.119	845.582	589.933	844.243	591.686	844.12	598.644	844.426	597.945	846.053	592.35	847.164	590.088	847.242	591.237	847.064	593.531	847.146	591.732	847.123	593.481	846.089	593.726	841.57	593.964	842.249	594.119	844.177	589.261	842.008	592.169	842.876	588.762	843.032	589.692	844.441	586.919	844.779	586.871	843.02	588.456	844.972	584.793	844.127	586.441
841.434	594.135	843.569	594.038	845.305	590.941	845.567	590.757	844.148	592.485	843.555	598.925	844.105	598.42	846.123	593.15	847.209	590.881	847.206	592.031	847.029	594.255	847.124	592.542	846.705	593.863	845.498	594.119	841.168	594.327	842.025	594.69	843.875	589.77	841.822	592.752	842.288	588.966	842.433	589.91	844.123	587.439	844.151	587.072	842.602	588.858	845.07	585.657	843.637	586.839
840.966	594.394	843.106	594.33	845.287	591.764	845.49	591.577	843.656	592.885	843.173	599.33	844.026	599.097	846.188	593.95	847.227	591.676	847.031	592.742	846.808	594.81	846.605	592.912	846.205	594.174	844.771	594.28	840.813	594.782	841.46	594.921	843.282	589.984	841.285	593.074	842.066	589.566	842.07	590.427	843.679	587.831	844.031	587.779	842.137	589.292	844.447	585.941	843.139	587.282
840.737	594.94	842.765	594.75	845.159	592.573	845.319	592.381	843.196	593.28	843.041	599.938	843.989	599.783	846.241	594.751	847.152	592.465	846.404	592.967	846.243	595.077	846.195	593.328	846.054	594.787	843.989	594.319	840.263	595.045	841.153	595.393	843.062	590.593	840.872	593.609	841.571	589.835	841.994	591.169	843.209	588.201	843.376	587.935	841.987	590.009	844.11	586.477	842.992	588.054
840.119	595.021	842.395	595.143	844.592	592.937	844.809	592.922	843.002	593.876	843.072	600.688	843.35	599.964	846.28	595.553	846.689	592.866	846.056	593.461	845.99	595.662	845.835	593.762	845.46	595.254	843.205	594.312	839.49	594.965	840.777	595.83	842.536	590.861	840.946	594.432	841.078	590.239	841.825	591.779	842.91	588.74	843.053	588.458	841.937	590.732	843.616	586.844	842.862	588.761
839.471	595.083	841.951	595.463	844.189	593.354	844.268	593.232	843.052	594.652	842.495	601.025	843.12	600.498	846.291	596.355	846.188	593.225	845.999	594.157	846.041	596.445	845.318	594.068	844.72	595.497	842.422	594.276	839.161	595.394	840.164	596.045	842.099	591.307	841.042	595.254	840.792	590.912	841.248	592.054	842.309	588.947	842.997	589.209	841.311	590.975	843.153	587.278	842.261	589.094
838.976	595.348	841.649	595.925	843.812	593.762	843.857	593.633	842.483	594.952	841.767	601.01	842.697	600.887	846.223	597.149	845.923	593.792	846.068	594.95	845.653	596.864	845.106	594.592	843.932	595.634	841.639	594.221	838.774	595.859	839.38	595.961	841.932	591.997	841.101	596.077	840.791	591.728	840.892	592.652	841.974	589.547	842.857	589.839	840.908	591.579	842.987	587.987	841.962	589.755
838.787	595.941	841.216	596.258	843.305	594.081	843.488	594.104	842.135	595.417	841.243	601.206	842.037	601.032	845.936	597.77	845.992	594.583	846.024	595.681	845.223	597.241	844.624	595.142	843.135	595.716	840.857	594.162	838.2	596.163	839.125	596.481	842.025	592.815	840.905	596.728	840.851	592.543	840.945	593.481	841.971	590.327	842.202	590.009	840.924	592.408	842.933	588.729	842.05	590.649
838.194	596.155	840.835	596.64	843.03	594.621	842.956	594.396	841.705	595.787	840.925	601.686	841.269	600.949	845.349	598.076	846.084	595.373	845.454	595.972	844.939	597.743	843.925	595.447	842.334	595.763	840.075	594.097	837.424	596.168	838.693	596.93	842.095	593.634	840.383	597.111	840.933	593.357	841.039	594.314	842.039	591.157	841.996	590.665	841.016	593.263	842.325	589.03	841.42	590.932
837.456	596.188	840.499	597.067	842.501	594.913	842.691	594.958	841.247	596.158	840.433	602.028	841.087	601.556	845.058	598.552	846.112	596.163	845.132	596.428	844.366	598.064	843.125	595.581	841.532	595.762	839.293	594.027	836.648	596.107	838.052	597.164	841.512	593.92	840.033	597.547	841.018	594.169	841.091	595.147	841.841	591.764	842.019	591.454	841.077	594.12	842.042	589.609	840.972	591.504
836.712	596.149	840.022	597.366	842.148	595.384	842.158	595.249	840.951	596.718	839.675	601.953	840.617	601.925	845.088	599.297	845.878	596.757	844.714	596.791	843.577	597.994	842.314	595.642	840.731	595.737	838.512	593.958	835.874	596.031	837.263	597.153	841.113	594.387	839.558	597.919	841.101	594.983	840.861	595.764	841.282	592.07	841.641	591.861	840.85	594.753	841.479	589.898	840.97	592.359
835.97	596.081	839.72	597.776	841.726	595.785	841.807	595.719	841.04	597.524	839.196	602.254	839.953	602.04	844.788	599.861	845.356	597.091	844.274	597.157	843.19	598.354	841.501	595.654	839.93	595.69	837.73	593.889	835.1	595.95	836.476	597.087	841.013	595.072	839.206	598.356	841.172	595.796	840.307	596.099	840.921	592.626	841.13	592.209	840.284	595.105	841.071	590.415	841.051	593.267
835.228	596.007	839.269	598.129	841.27	596.158	841.401	596.137	840.574	597.866	838.828	602.694	839.18	601.956	844.142	600.083	845.059	597.544	843.988	597.684	842.841	598.904	840.689	595.619	839.132	595.614	836.948	593.825	834.326	595.872	835.69	597.005	840.898	595.726	838.8	598.835	841.221	596.612	839.966	596.621	841.005	593.452	840.895	592.875	839.898	595.66	840.993	591.175	840.697	593.8
834.487	595.93	838.825	598.554	840.93	596.654	840.901	596.454	840.119	598.295	838.401	603.03	838.407	601.924	843.399	600.025	844.594	597.874	844.101	598.474	842.285	599.38	839.88	595.543	838.338	595.5	836.165	593.766	833.55	595.812	834.904	596.922	840.36	596.059	838.2	599.168	841.155	597.421	840.065	597.453	841.067	594.282	840.965	593.692	839.958	596.517	840.769	591.761	840.127	594.24
833.745	595.854	838.718	599.305	840.419	596.915	840.667	597.005	839.906	598.929	838.059	603.478	838.098	602.429	843.082	600.492	844.214	598.284	843.661	598.962	841.503	599.567	839.082	595.402	837.566	595.289	835.383	593.712	832.776	595.834	834.117	596.848	840.055	596.554	837.375	599.172	840.697	597.881	839.625	597.879	840.749	594.803	841.06	594.508	840.056	597.372	840.217	592.121	839.818	594.945
833.001	595.801	838.727	600.069	839.864	597.38	839.959	597.207	839.968	599.738	837.64	603.824	837.696	602.803	842.65	600.971	843.84	598.7	842.973	599.066	840.703	599.657	838.394	595.112	837.131	594.762	834.599	593.686	832.228	596.144	833.33	596.798	839.561	596.899	836.551	599.106	840.251	598.272	839.208	598.305	840.256	595.186	841.099	595.324	840.104	598.228	839.819	592.736	839.825	595.857
832.257	595.785	838.76	600.832	839.57	598.084	839.67	597.897	840.066	600.544	837.222	604.216	837.256	603.121	841.985	601.145	843.398	599.052	842.35	599.149	839.9	599.695	837.963	594.561	836.793	594.167	833.815	593.687	831.858	596.628	832.546	596.85	839.213	597.343	835.729	599.018	839.879	598.681	838.807	598.729	839.979	595.748	840.766	595.83	839.777	598.797	839.795	593.604	839.89	596.768
831.558	595.891	838.811	601.595	839.456	598.894	839.617	598.707	840.114	601.353	836.95	604.753	836.993	603.658	841.186	601.096	843.071	599.496	842.015	599.587	839.096	599.691	837.715	593.904	836.323	593.708	833.037	593.744	831.491	597.007	832.108	597.308	838.826	597.826	834.907	598.926	839.41	599.047	838.353	599.111	840.079	596.576	840.23	596.163	839.262	599.204	839.847	594.473	839.979	597.677
830.948	596.196	838.871	602.357	839.435	599.715	839.795	599.478	839.728	601.835	837.039	605.529	836.488	603.872	840.39	600.996	842.636	599.914	841.624	600.185	838.293	599.645	837.02	593.625	835.544	593.534	832.331	593.931	830.725	596.904	831.733	597.73	838.23	598.182	834.083	598.846	839.095	599.503	838.003	599.579	839.546	596.935	839.978	596.755	838.971	599.768	839.923	595.34	840.07	598.586
830.858	596.808	838.943	603.118	839.49	600.534	840.252	600.05	839.25	602.226	836.598	605.865	835.982	604.29	839.595	600.884	841.979	600.013	840.914	600.462	837.495	599.553	836.221	593.49	834.744	593.476	831.984	594.495	830.154	597.195	831.235	597.933	837.41	598.208	833.259	598.805	838.638	599.966	837.524	600.006	839.152	597.371	840.069	597.57	839.011	600.573	840.009	596.206	840.152	599.495
830.407	597.086	839.014	603.88	839.667	601.335	841.023	600.096	838.973	602.749	836.127	606.259	835.644	604.904	838.799	600.779	841.338	600.105	840.134	600.607	836.719	599.355	835.411	593.425	833.943	593.487	831.6	594.844	829.91	597.784	830.459	597.862	836.588	598.155	832.462	598.87	837.946	600.12	836.743	599.969	838.731	597.765	839.553	597.904	838.511	600.957	840.093	597.072	840.203	600.406
829.948	597.368	839.085	604.641	840.161	601.863	841.043	600.898	839.044	603.533	835.846	606.833	835.538	605.67	838.002	600.684	840.967	600.561	839.339	600.678	836.17	598.893	834.599	593.41	833.147	593.573	831.232	595.242	829.944	598.504	829.846	598.297	835.769	598.08	831.972	599.384	837.133	600.066	836.195	600.258	838.28	598.163	839.169	598.353	837.991	601.396	840.159	597.94	840.167	601.315
829.852	598.008	839.152	605.403	840.716	602.209	840.978	601.718	838.586	603.935	835.84	607.612	835.555	606.448	837.203	600.607	840.567	601.026	838.542	600.703	835.816	598.351	833.787	593.45	832.435	593.829	830.856	595.654	829.6	598.9	829.502	598.962	834.95	597.994	831.659	599.818	836.321	599.971	835.786	600.705	837.955	598.7	838.774	598.769	837.918	602.163	840.183	598.808	839.707	601.892
829.204	598.107	839.208	606.165	841.017	602.7	841.002	602.523	838.125	604.327	835.901	608.392	835.69	607.21	836.402	600.56	839.843	601.008	837.744	600.681	835.415	597.99	832.986	593.584	831.913	594.335	830.438	595.998	829.014	599.223	829.338	599.725	834.132	597.909	831.116	600.171	835.509	599.877	835.369	601.112	838.061	599.524	838.266	599.088	838.003	603.019	840.072	599.616	839.172	602.308
828.919	598.558	839.241	606.929	841.019	603.464	841.346	603.048	837.997	604.962	835.981	609.17	836.073	607.742	835.6	600.582	839.059	600.879	836.95	600.609	834.627	598.061	832.298	593.933	831.759	594.924	830.007	596.429	828.632	599.783	829.297	600.512	833.312	597.835	830.661	600.705	834.693	599.848	834.943	601.535	837.586	599.941	837.946	599.653	838.081	603.874	839.486	600.017	839.022	603.003
828.651	599.032	839.237	607.692	841.348	603.993	842.06	603.174	837.91	605.638	836.063	609.948	836.636	608.09	834.813	600.718	838.276	600.746	836.167	600.47	834.081	597.726	831.909	594.485	831.215	595.176	829.983	597.132	828.476	600.54	829.344	601.301	832.49	597.787	830.534	601.504	834.144	600.227	834.539	601.902	837.158	600.344	838.036	600.467	837.969	604.618	839.008	600.443	838.838	603.717
827.938	599.088	839.139	608.418	842.031	604.23	842.38	603.905	837.48	606.073	836.139	610.726	837.234	608.391	834.099	601.04	837.489	600.635	835.458	600.19	833.781	597.181	831.682	595.037	830.865	595.625	829.815	597.701	828.413	601.315	829.52	602.068	831.67	597.824	830.625	602.315	833.758	600.679	834	602.327	836.743	600.746	837.611	600.858	837.477	605.078	838.996	601.234	838.35	604.182
827.689	599.759	838.784	608.996	842.327	604.892	842.468	604.719	837.032	606.425	836.199	611.505	837.407	609.148	833.588	601.588	836.696	600.595	834.917	599.703	833.227	596.96	830.986	595.152	830.524	596.085	829.359	598.062	828.442	602.091	829.901	602.72	831.136	598.238	831.09	602.934	833.349	601.062	833.787	603.041	836.303	601.157	837.17	601.277	836.968	605.44	839.067	602.099	837.873	604.601
827.599	600.484	838.211	609.188	842.383	605.703	842.445	605.54	836.656	606.821	836.176	612.285	837.498	609.918	833.374	602.339	835.916	600.689	834.792	599.051	832.498	596.929	830.883	595.852	829.939	596.312	828.778	598.414	828.551	602.857	830.455	603.104	830.743	598.707	831.843	603.017	832.765	601.453	833.768	603.876	835.947	601.666	836.975	601.908	837.048	606.281	838.827	602.741	837.437	605.08
827.673	601.206	837.998	609.688	842.215	606.467	842.288	606.34	836.174	607.214	835.814	612.827	837.522	610.694	833.449	603.13	835.215	600.988	834.101	599.011	831.955	596.631	830.307	596.087	829.766	596.912	828.619	599.163	828.816	603.546	831.037	603.287	830.365	599.116	832.599	603.07	832.619	602.25	833.809	604.713	836.028	602.486	836.981	602.654	836.719	606.851	838.326	603.17	836.972	605.545
827.952	601.874	837.992	610.406	841.753	607.053	841.879	606.912	835.87	607.785	835.356	613.202	837.483	611.469	833.872	603.759	834.664	601.504	833.379	598.924	831.824	595.885	829.928	596.522	829.127	597.138	828.639	599.935	829.277	604.067	831.162	603.974	829.937	599.534	833.023	603.465	832.674	603.058	833.875	605.549	835.604	602.9	836.436	602.93	836.251	607.255	837.971	603.681	837.083	606.441
828.618	601.968	837.781	611.008	841.048	607.147	841.153	607.038	835.891	608.595	834.935	613.516	837.351	612.233	834.526	603.991	834.329	602.209	832.921	598.534	831.186	595.533	829.635	597.05	828.687	597.66	828.89	600.602	829.917	604.174	831.782	604.138	829.546	599.922	833.038	604.265	833.003	603.695	833.956	606.384	835.074	603.292	835.997	603.424	835.819	607.676	838.02	604.511	836.634	607.048
828.938	602.393	837.169	611.167	841.064	607.888	841.031	607.737	835.976	609.402	834.614	613.987	836.95	612.836	834.98	604.334	834.218	602.992	832.815	597.855	830.413	595.451	828.944	597.186	828.484	598.422	829.384	601.07	830.127	604.752	832.103	604.595	828.959	600.299	833.121	605.007	833.569	604.084	834.039	607.219	834.853	603.957	835.885	604.149	835.406	608.126	837.567	604.979	835.763	606.994
829.158	602.916	836.995	611.712	840.966	608.645	841.049	608.541	836.067	610.209	834.15	614.298	836.407	613.145	835.144	604.971	834.226	603.781	832.122	598.018	829.657	595.624	828.981	597.991	828.41	599.22	829.959	601.274	830.562	605.101	832.413	605.063	828.725	600.968	833.876	605.08	834.189	604.365	834.115	608.054	834.869	604.788	835.944	604.967	834.932	608.508	837.057	605.372	835.126	607.284
829.843	602.973	836.977	612.427	840.492	609.028	840.592	608.913	836.117	611.018	833.788	614.713	835.934	613.433	835.921	604.992	834.338	604.563	831.731	598.644	829.001	596.054	828.923	598.758	828.42	600.021	829.962	601.972	831.068	605.374	833.032	605.223	828.933	601.649	834.273	605.686	834.407	605.149	834.174	608.891	834.942	605.62	836.032	605.783	834.585	609.017	837.027	606.135	834.735	607.81
829.945	603.608	836.784	613.039	839.704	609.042	840.138	609.289	835.919	611.677	833.423	615.126	835.749	614.049	836.072	605.717	834.578	605.303	831.516	599.4	828.578	596.731	828.416	599.072	828.527	600.814	830.088	602.639	831.188	606.036	833.133	605.885	829.462	602.102	834.429	606.48	834.505	605.959	834.194	609.727	835.03	606.45	836.115	606.599	834.066	609.353	836.787	606.774	834.264	608.233
830.361	603.98	836.148	613.154	838.978	609.14	839.877	609.844	835.464	612.123	832.961	615.444	835.12	614.19	836.042	606.509	834.997	605.946	831.421	600.19	828.33	597.488	827.863	599.389	828.801	601.543	830.463	603.104	831.863	606.151	833.74	606.077	830.019	602.338	834.434	607.304	834.549	606.774	834.091	610.511	835.108	607.281	836.129	607.418	833.704	609.85	836.333	607.208	833.826	608.739
831.067	604.058	835.888	613.651	838.907	609.877	839.199	610.036	834.955	612.418	832.655	615.921	834.859	614.691	835.987	607.306	835.741	605.981	831.406	600.987	828.194	598.277	827.723	600.138	829.312	601.987	831.031	603.307	832.134	606.638	834.118	606.555	830.272	602.905	834.331	608.119	834.544	607.59	833.626	611.034	835.134	608.114	835.684	607.875	833.252	610.245	835.887	607.627	833.226	609.066
831.806	603.96	835.535	614.069	838.284	610.066	838.38	609.966	835.04	613.224	832.21	616.26	834.493	615.09	836.125	607.958	836.183	606.511	831.486	601.782	828.149	599.077	827.962	600.875	829.961	602.133	831.234	603.895	832.496	607.053	834.193	607.332	830.836	603.202	834.06	608.89	834.486	608.404	833.046	611.31	834.86	608.742	835.216	608.276	832.827	610.697	835.407	608.05	832.319	608.991
832.54	603.948	834.95	614.256	837.958	610.554	838.092	610.493	834.78	613.806	831.827	616.658	833.953	615.32	836.893	607.987	836.424	607.252	831.748	602.519	828.185	599.88	828.7	600.954	830.022	602.873	831.738	604.178	833.135	607.257	834.157	608.12	831.049	603.785	833.307	608.974	834.351	609.204	832.97	612.022	834.354	609.153	834.995	608.844	832.302	611.026	834.559	607.973	831.486	609.014
832.916	604.319	835.015	615.015	837.608	611.021	837.641	610.874	834.316	614.183	831.478	617.09	833.813	615.959	837.28	608.63	836.546	608.036	832.289	602.899	828.318	600.672	828.95	601.518	830.695	602.996	832.129	604.558	833.447	607.957	834.083	608.907	831.097	604.509	832.829	609.493	833.975	609.9	833.049	612.856	833.912	609.568	834.995	609.593	831.505	611.016	834.043	608.369	830.922	609.444
833.111	604.878	834.92	615.702	836.985	611.217	836.935	610.97	833.993	614.64	830.993	617.384	833.217	616.148	837.473	609.388	836.618	608.828	832.818	603.194	828.61	601.412	829.336	601.953	830.978	603.512	832.4	605.055	833.602	608.714	834.001	609.693	831.412	605.019	832.592	610.249	833.296	610.055	832.953	613.58	833.939	610.4	834.515	610.007	830.954	611.393	833.685	608.917	830.607	610.047
833.777	604.952	834.518	616.079	837.006	612.031	836.215	611.04	834.042	615.419	830.704	617.873	832.882	616.595	837.547	610.184	836.652	609.622	832.997	603.791	829.156	601.859	829.94	602.168	831.31	603.983	833.025	605.235	833.693	609.485	833.92	610.479	832.114	605.221	832.504	611.068	832.918	610.553	832.524	614.075	834.032	611.229	834.132	610.408	830.655	611.921	832.953	608.988	829.701	609.947
833.946	605.54	833.955	616.275	836.969	612.814	835.923	611.682	833.713	616.009	830.267	618.214	832.574	617.071	837.544	610.984	836.66	610.416	833.659	603.94	829.683	602.201	830.005	602.916	831.983	604.116	833.026	605.976	833.741	610.261	833.853	611.266	832.45	605.945	832.491	611.894	832.835	611.349	831.897	614.331	834.102	612.06	833.71	610.841	830.096	612.272	832.281	609.177	829.038	610.267
834.327	605.899	833.866	616.957	836.351	613.019	836.014	612.494	832.963	615.984	829.863	618.585	831.942	617.232	837.467	611.782	836.641	611.211	833.903	604.5	830.02	602.616	830.743	602.986	832.012	604.89	833.125	606.637	833.758	611.039	833.818	612.055	832.661	606.734	832.556	612.717	832.864	612.166	831.934	615.168	833.875	612.719	833.08	611.011	829.992	612.971	831.842	609.648	828.744	610.877
834.93	606.062	833.251	617.111	835.974	613.466	835.588	612.863	832.28	616.13	829.561	619.058	832.007	618.001	837.246	612.548	836.588	612.004	834.34	604.865	830.489	603.041	830.959	603.567	832.692	605.007	833.503	607.055	833.736	611.816	834.01	612.796	832.807	607.542	832.755	613.515	832.925	612.981	832.023	616.001	833.371	613.134	832.378	611.072	829.853	613.666	831.363	610.027	828.175	611.224
835.322	606.652	832.912	617.541	835.705	614.019	835.157	613.283	831.957	616.631	829.053	619.328	831.901	618.698	836.679	612.901	836.479	612.791	834.835	605.175	831.26	602.976	831.399	603.945	832.987	605.507	834.159	607.252	833.683	612.592	834.584	613.041	832.917	608.358	833.318	613.896	832.994	613.795	832.103	616.836	832.888	613.516	831.953	611.518	829.397	614.118	830.543	609.999	827.793	611.747
835.507	607.359	832.67	618.067	835.016	614.141	834.989	613.943	831.972	617.398	828.747	619.804	831.505	619.098	836.189	613.261	836.234	613.538	835.039	605.783	831.78	603.248	832.152	604.006	833.325	605.962	834.44	607.978	833.587	613.364	834.998	613.401	833	609.177	833.829	614.273	833.066	614.609	831.987	617.591	832.904	614.349	831.566	611.929	828.913	614.522	829.963	610.359	827.271	612.162
835.605	608.094	831.987	618.147	835.004	614.928	834.99	614.693	831.74	618.013	828.336	620.177	830.985	619.32	836.011	613.867	835.682	613.892	835.658	605.92	832.171	603.7	832.879	604.051	833.946	606.136	834.598	608.742	833.421	614.118	835.015	614.164	833.051	609.998	834.019	614.909	833.138	615.423	831.568	618.121	832.993	615.179	831.144	612.337	828.984	615.379	829.681	610.928	826.963	612.749
835.647	608.837	831.878	618.794	834.975	615.722	834.406	614.966	831.141	618.22	827.9	620.524	831.062	620.087	836.076	614.665	835.174	614.235	836.162	606.411	832.645	604.044	832.961	604.77	833.991	606.891	834.696	609.519	833.09	614.804	835.043	614.934	833.095	610.82	833.987	615.693	833.203	616.238	830.962	618.303	833.084	616.008	830.744	612.731	829.083	616.234	829.15	611.271	826.901	613.548
835.632	609.582	831.418	619.087	834.444	616.009	834.105	615.477	830.828	618.723	827.619	621.026	830.917	620.774	835.493	614.929	834.972	614.846	836.477	607.096	833.443	603.938	833.61	604.925	834.707	606.974	834.751	610.301	832.423	614.927	835.719	615.033	833.116	611.643	834.582	615.921	833.257	617.053	830.769	618.944	833.138	616.84	830.293	613.123	828.785	616.887	828.771	611.765	826.474	614.059
835.559	610.322	830.95	619.374	834.012	616.393	833.646	615.823	830.415	619.129	827.107	621.295	830.384	621.027	835.15	615.391	835.067	615.635	836.638	607.876	833.903	604.34	833.932	605.43	835.197	607.455	834.77	611.086	832.027	615.361	836.198	615.485	833.123	612.466	835.125	616.394	833.291	617.87	830.188	619.188	832.999	617.586	829.858	613.606	828.218	617.204	828.319	612.183	825.841	614.43
835.41	611.046	830.84	620.018	833.772	616.969	833.198	616.223	829.911	619.438	826.784	621.752	829.647	621.048	834.754	615.78	835.102	616.428	836.733	608.669	834.277	604.77	834.283	605.899	835.451	608.196	834.741	611.869	831.935	616.099	836.436	616.204	833.12	613.289	835.412	617.099	833.281	618.686	829.855	619.683	832.58	618.104	829.877	614.424	827.997	617.78	827.862	612.594	825.718	615.332
835.142	611.696	830.175	620.104	833.041	617.054	832.971	616.841	829.706	620.033	826.399	622.144	828.986	621.157	834.263	616.089	834.705	616.86	836.773	609.466	834.676	605.172	834.955	606.069	835.551	608.989	834.677	612.651	832.006	616.874	836.497	616.989	833.099	614.112	835.495	617.916	833.13	619.467	829.448	620.107	831.971	618.301	829.968	615.24	827.94	618.557	827.495	613.096	825.706	616.245
834.545	611.963	829.935	620.625	833.002	617.834	833.033	617.625	829.069	620.216	825.928	622.449	828.91	621.845	833.95	616.643	834.233	617.217	836.772	610.265	835.11	605.547	835.381	606.728	835.563	609.79	834.568	613.425	832.09	617.647	836.446	617.776	833.061	614.934	835.451	618.737	832.7	619.957	828.927	620.42	831.767	618.947	830.064	616.055	827.574	619.1	826.944	613.41	825.746	617.157
834.162	612.343	829.574	621.013	832.329	617.982	832.49	617.939	829.003	620.9	825.688	622.996	828.355	622.059	834.036	617.438	833.951	617.712	836.737	611.062	835.459	605.938	835.582	607.51	835.489	610.587	834.385	614.181	832.152	618.422	836.241	618.531	833.008	615.755	835.266	619.532	832.066	620.119	828.711	621.041	831.181	619.198	830.122	616.872	826.974	619.318	826.677	614.008	825.807	618.068
834.014	612.902	828.826	620.997	832.005	618.483	832.084	618.403	828.911	621.615	825.21	623.247	827.966	622.449	833.648	617.838	833.389	617.952	836.665	611.856	836.085	606.287	835.711	608.311	835.306	611.362	834.056	614.88	832.142	619.193	835.719	618.915	832.929	616.574	834.676	619.972	832.014	620.883	828.04	621.21	830.842	619.695	829.998	617.593	826.779	620.013	826.081	614.276	825.877	618.978
834.029	613.597	828.133	621.075	832.005	619.294	832.017	619.105	828.551	622.089	824.888	623.755	827.77	623.038	833.207	618.23	833.111	618.47	836.547	612.645	836.396	606.952	835.79	609.12	834.862	611.856	833.356	614.985	831.959	619.859	835.178	619.198	832.825	617.39	834.198	620.307	831.279	620.965	827.821	621.832	830.434	620.122	829.553	618.086	825.973	620.027	825.768	614.821	825.956	619.888
833.561	613.916	827.952	621.651	831.881	619.965	831.852	619.728	827.965	622.291	824.483	624.272	826.998	623.032	832.981	618.816	832.675	618.828	836.318	613.405	836.525	607.74	835.829	609.933	834.227	612.089	833.063	615.464	831.281	619.983	835.004	619.785	832.692	618.202	833.799	620.728	831.035	621.537	827.293	622.147	829.913	620.43	829.054	618.365	825.263	620.15	825.276	615.189	826.036	620.798
833.167	614.303	827.573	622.027	831.08	619.993	831.37	620.111	827.81	622.953	823.742	624.504	826.257	623.051	833.065	619.606	832.235	619.181	835.801	613.874	836.562	608.542	835.832	610.746	833.941	612.672	833.028	616.198	831.084	620.54	834.368	619.954	832.51	619.004	833.403	621.154	830.649	622	826.879	622.572	829.71	621.046	828.715	618.85	824.919	620.689	824.851	615.63	826.115	621.708
832.99	614.852	826.987	622.2	831.01	620.742	831.003	620.549	827.22	623.161	822.968	624.604	825.963	623.528	832.537	619.927	831.965	619.701	835.29	614.228	836.529	609.345	835.804	611.558	833.993	613.459	832.949	616.902	830.66	620.879	834.121	620.468	832.137	619.719	832.975	621.525	829.865	622.055	826.539	623.076	829.065	621.212	828.261	619.218	824.493	621.265	824.469	616.114	826.188	622.618
833.033	615.56	826.957	622.936	830.429	620.978	830.549	620.924	826.902	623.683	822.188	624.641	825.709	624.131	832.171	620.356	831.415	619.942	835.004	614.689	836.383	610.134	835.747	612.369	834.076	614.257	832.247	616.98	830.177	621.161	833.735	620.938	831.477	619.96	832.633	622.12	829.054	621.956	825.933	623.325	828.839	621.832	827.846	619.613	823.685	621.541	823.933	616.447	826.248	623.529
832.595	615.921	826.29	623.033	830.045	621.408	830.158	621.358	826.48	624.115	821.408	624.627	825.023	624.452	831.774	620.751	831.144	620.438	835.076	615.467	835.999	610.762	835.645	613.176	834.115	615.054	832.057	617.564	830.052	621.781	833.081	621.19	831.081	620.38	831.823	622.165	828.245	621.966	826.027	624.158	828.223	622.013	827.495	620.075	822.841	621.7	823.642	617.042	826.294	624.441
832.222	616.292	825.545	623.033	829.754	621.93	829.737	621.762	825.672	624.125	820.631	624.558	824.258	624.59	831.339	621.118	830.726	620.846	834.657	615.936	835.427	611.108	835.475	613.969	833.973	615.736	831.633	617.912	829.413	622.028	832.292	621.178	830.809	620.92	831	622.106	828.038	622.578	825.85	624.874	827.465	622.067	826.938	620.369	821.986	621.801	822.781	616.928	826.305	625.354
831.856	616.66	824.999	623.225	829.086	622.076	829.318	622.167	824.864	624.046	819.863	624.418	823.484	624.67	830.997	621.572	830.094	621.025	834.206	616.281	834.945	611.43	835.18	614.689	833.368	615.977	831.088	618.153	828.677	622.027	831.506	621.103	830.11	621.056	830.18	622.005	827.583	622.946	825.277	625.147	826.941	622.396	827.03	621.183	821.126	621.846	822.077	617.191	826.229	626.254
831.468	617.019	824.989	623.972	829.032	622.839	828.936	622.607	824.056	623.962	819.197	624.049	822.707	624.702	830.541	621.929	829.346	620.984	833.818	616.681	834.966	612.232	834.517	615.012	833.057	616.496	830.982	618.878	827.905	621.958	830.721	621.009	830.044	621.785	829.361	621.888	826.828	622.999	824.888	625.594	826.753	623.049	826.8	621.807	820.266	621.866	821.977	617.924	825.854	627.022
831.106	617.396	824.339	624.309	828.322	622.956	828.48	622.985	823.321	624.072	818.959	623.434	821.929	624.691	830.194	622.356	829.08	621.523	833.445	617.107	835.053	613.032	834.111	615.417	833.036	617.215	831.032	619.649	827.229	622.025	829.938	620.906	829.453	622.236	828.543	621.765	826.121	623.073	824.544	626.092	825.924	623.017	826.351	622.182	819.406	621.865	821.874	618.675	825.079	627.117
830.738	617.769	823.611	624.503	828.049	623.507	828.132	623.423	822.927	624.53	818.621	623.017	821.153	624.639	829.798	622.811	828.618	621.914	832.971	617.425	835.121	613.834	834.038	616.091	832.821	617.774	830.532	619.923	827.055	622.643	829.155	620.799	828.694	622.475	827.726	621.639	826.025	623.789	823.936	626.316	825.208	623.121	825.909	622.549	818.546	621.83	821.438	619.117	825.071	627.925
830.365	618.136	822.856	624.6	827.669	623.975	827.706	623.9	822.68	625.152	817.861	623.029	820.384	624.523	829.236	623.132	827.953	622.023	832.668	617.918	835.005	614.576	833.869	616.716	832.317	618.108	830.102	620.285	826.525	622.925	828.371	620.694	827.881	622.584	826.907	621.52	825.374	623.971	823.811	627.017	824.935	623.697	825.575	623.067	817.689	621.756	820.917	619.461	824.952	628.764
829.987	618.496	822.093	624.639	826.887	624.039	827.054	624.093	821.939	625.452	817.114	622.956	819.643	624.31	828.436	623.11	827.319	622.115	832.213	618.254	834.611	615.081	833.391	617.106	832.029	618.603	829.912	620.882	825.832	622.976	827.587	620.595	827.06	622.631	826.088	621.405	824.6	623.984	823.133	627.157	824.515	624.246	824.759	623.008	816.837	621.642	820.643	620.062	824.287	629.056
829.635	618.894	821.33	624.615	826.099	624.004	826.232	624.022	821.137	625.567	816.963	622.33	819.128	623.89	827.638	623.019	827.033	622.616	831.826	618.668	833.975	615.217	833.024	617.528	831.525	618.907	829.209	620.973	825.224	623.103	826.802	620.509	826.237	622.635	825.267	621.305	824.114	624.289	822.886	627.749	823.732	624.509	824.17	623.224	815.996	621.468	819.965	620.256	823.419	629.082
829.268	619.249	820.571	624.534	826.039	624.759	825.46	623.991	820.328	625.615	816.514	622.013	818.965	623.224	826.84	622.953	826.597	623.18	831.488	619.118	834.029	616.01	832.576	617.896	831.171	619.356	829.062	621.596	824.986	623.686	826.015	620.434	825.415	622.589	824.445	621.223	823.852	624.838	822.345	628.03	822.911	624.649	823.871	623.802	815.23	621.107	819.789	620.963	822.965	629.51
828.904	619.637	819.834	624.367	825.477	625.229	825.068	624.439	819.517	625.609	815.765	621.99	818.374	623.042	826.285	623.184	825.894	623.432	831.046	619.409	833.916	616.731	832.185	618.32	830.773	619.763	828.607	621.967	824.465	623.854	825.227	620.372	824.598	622.492	823.621	621.157	823.193	624.973	821.556	628.063	822.08	624.725	823.399	624.295	815.038	620.395	819.172	621.196	822.607	630.176
828.551	620.113	819.184	624.064	824.724	625.482	824.712	625.058	818.71	625.544	815.025	621.944	817.64	623.038	825.926	623.695	825.11	623.536	830.762	620.076	833.449	617.076	831.782	618.719	830.324	620.112	827.896	622.053	824.02	624.313	824.437	620.35	823.798	622.319	822.794	621.119	823.062	625.665	820.961	628.313	821.245	624.753	822.614	624.511	814.503	620.068	818.876	621.81	821.782	630.505
827.81	620.077	819.045	623.394	823.911	625.594	824.058	625.414	817.915	625.405	814.975	621.23	817.167	622.753	825.538	624.287	824.317	623.559	830.112	620.422	832.961	617.374	831.347	619.098	830.073	620.61	827.117	621.963	823.776	624.971	823.648	620.369	823.211	621.933	821.968	621.14	822.484	625.897	820.872	629.074	820.411	624.74	821.801	624.612	813.694	620.024	818.332	622.272	820.879	630.63
827.069	620.01	818.559	623.101	823.091	625.635	823.254	625.574	817.17	625.103	814.416	620.98	816.906	622.219	824.761	624.484	823.525	623.515	829.341	620.615	832.809	618.022	830.94	619.557	829.554	621.04	826.341	621.955	823.759	625.748	822.863	620.436	822.941	621.273	821.148	621.214	822.087	626.349	820.106	629.379	819.579	624.688	820.981	624.637	813.105	619.77	817.492	622.392	819.966	630.663
826.435	620.067	817.894	623.024	822.268	625.619	822.431	625.637	817.027	624.393	813.659	620.978	816.324	621.979	823.968	624.598	822.75	623.352	828.552	620.734	832.085	618.099	831.049	620.363	828.825	621.13	826.087	622.48	823.807	626.524	822.091	620.576	822.528	620.656	820.342	621.37	821.998	627.085	819.283	629.487	818.752	624.59	820.162	624.605	812.898	619.124	816.663	622.266	819.054	630.624
826.023	620.411	817.239	622.958	821.451	625.525	821.606	625.641	816.545	624.07	812.888	621.046	815.565	622.029	823.168	624.655	822.195	622.918	827.756	620.804	831.923	618.75	830.696	620.853	828.026	621.072	825.692	622.884	823.875	627.3	821.349	620.825	821.771	620.379	819.581	621.655	821.98	627.81	818.449	629.462	817.938	624.423	819.351	624.501	812.133	618.989	816.019	621.839	818.151	630.496
825.757	621.004	817.053	622.366	820.665	625.312	820.784	625.579	815.794	624.029	812.138	620.989	815.173	621.679	822.366	624.667	821.837	622.382	826.958	620.827	831.447	619.077	830.266	621.245	827.229	620.984	825.019	623.003	823.951	628.074	820.737	621.309	820.965	620.24	818.923	622.133	821.287	627.967	817.647	629.28	817.18	624.099	818.586	624.265	811.287	619.033	815.971	621.033	817.308	630.184
825.209	621.363	816.545	622.077	820.165	624.834	819.974	625.431	815.119	623.906	812.022	620.336	814.849	621.195	821.564	624.639	821.469	621.984	826.159	620.826	830.96	619.39	829.861	621.645	826.431	620.896	824.244	622.949	824.031	628.848	820.362	621.978	820.147	620.217	818.548	622.861	821.081	628.576	817.059	628.848	817.035	623.375	818	623.814	811.071	618.401	815.126	621.033	817.036	629.44
824.495	621.555	815.876	622.011	819.827	624.276	819.299	625.063	815.015	623.193	811.54	620.017	814.265	620.914	820.766	624.562	820.679	622.064	825.362	620.8	830.811	620.083	829.471	622.081	825.632	620.884	824.073	623.568	824.112	629.622	820.193	622.728	819.341	620.324	818.396	623.664	820.579	628.901	816.963	628.102	816.503	623.045	817.952	623.057	810.518	618.084	814.298	620.988	816.467	629.107
823.759	621.665	815.253	621.919	819.299	623.999	818.9	624.507	814.358	623.057	810.79	619.974	813.492	621.002	819.98	624.41	820.124	621.765	824.565	620.743	830.11	620.443	829.079	622.444	825.16	621.278	823.596	623.867	824.177	630.397	820.217	623.504	818.579	620.597	818.383	624.486	820.155	629.288	816.209	628.065	815.73	622.991	817.189	623.04	810.111	617.631	814.01	620.411	816.099	628.56
823.016	621.721	815.023	621.358	818.481	624.085	818.655	623.96	814.097	622.524	810.075	619.949	812.717	621.07	819.329	624.064	819.812	621.253	823.773	620.645	829.331	620.62	828.72	623.045	824.772	621.742	823.169	624.225	824.218	631.174	820.414	624.262	817.99	621.139	818.467	625.308	819.904	629.884	815.395	628.045	815.125	622.798	816.402	622.992	809.792	617.008	813.537	620.02	815.613	628.143
822.272	621.751	814.521	621.116	818.1	623.595	817.982	623.804	813.697	622.114	810.025	619.233	812.21	620.808	818.911	623.529	819.322	620.974	822.994	620.47	828.535	620.728	828.073	623.372	824.26	622.015	822.925	624.777	824.21	631.95	820.916	624.831	817.685	621.876	818.612	626.122	819.317	630.351	815.021	627.539	814.957	622.11	815.999	622.564	809.069	616.707	813.026	619.666	815.061	627.724
821.527	621.753	814.185	620.698	817.675	623.19	817.846	623.097	813.138	621.853	809.497	618.778	811.904	620.284	818.698	622.93	818.58	620.976	822.317	620.116	827.733	620.794	827.275	623.482	823.469	621.936	822.318	624.945	824.069	632.655	821.595	625.003	817.572	622.676	818.786	626.93	818.513	630.474	814.979	626.753	814.447	621.491	815.73	622.021	808.258	616.857	812.806	619.017	814.859	626.923
820.782	621.719	813.856	620.265	817.271	622.789	817.17	623.001	813.028	621.153	808.785	618.517	811.398	619.948	817.899	622.911	818.014	620.722	821.98	619.54	826.93	620.829	826.465	623.472	823.075	622.405	821.964	625.47	823.519	633.02	821.992	625.389	817.586	623.495	818.96	627.739	817.7	630.484	814.831	626.121	813.72	621.099	815.036	621.899	808.046	617.585	811.954	618.994	814.92	626.013
820.041	621.64	813.35	620.013	816.904	622.327	816.414	622.939	812.316	621	808.015	618.397	810.641	620.01	817.099	622.965	817.799	620.103	821.739	619.011	826.125	620.836	825.662	623.356	822.679	622.808	822.221	625.813	823.159	633.399	822.188	625.981	817.671	624.312	819.009	628.546	816.896	630.375	814.165	625.934	812.942	620.801	814.985	621.136	807.504	617.93	811.099	619.023	815.024	625.106
819.309	621.513	813.094	619.508	816.409	621.938	815.927	622.576	811.529	621.026	807.235	618.351	810.211	619.707	816.3	623.04	817.187	619.895	820.948	619.046	825.321	620.8	825.09	622.868	822.286	623.206	822.76	626.12	822.759	633.771	822.95	626.005	817.796	625.126	818.587	628.93	816.257	630.037	814.05	625.256	812.141	620.57	814.298	621.006	806.724	617.959	811.027	618.227	815.113	624.198
818.616	621.296	812.666	619.174	815.593	622.045	815.729	621.953	811.105	620.66	806.454	618.368	809.888	619.187	815.501	623.116	816.396	619.919	820.197	618.977	824.52	620.729	824.838	622.269	821.895	623.619	823.085	626.667	822.356	634.151	823.026	626.744	817.945	625.935	818.1	629.261	815.908	629.418	813.509	624.708	811.327	620.389	814.015	620.469	806.183	618.268	810.357	618.023	815.09	623.293
818.023	620.909	812.262	618.817	815.134	621.657	815.01	621.843	810.797	620.139	805.677	618.441	809.414	618.682	814.701	623.176	815.606	620.003	819.995	618.382	823.725	620.616	824.34	622.01	821.497	624.038	823.017	627.448	822.044	634.568	823.019	627.516	818.087	626.746	817.904	629.884	815.505	629.032	812.773	624.37	810.505	620.246	813.658	620.004	805.788	618.75	810.035	617.482	814.387	623.056
817.916	620.267	811.971	618.346	814.722	621.232	814.874	621.134	810.18	619.942	804.916	618.595	808.664	618.492	813.899	623.187	814.816	620.094	819.581	618.002	822.946	620.437	823.577	621.996	821.135	624.405	822.959	628.229	821.642	635.133	823.323	627.969	818.204	627.56	817.156	629.964	815.164	628.603	811.963	624.16	809.677	620.14	813.016	619.828	805.298	619.101	809.646	616.884	814	622.453
817.468	620.012	811.482	618.052	814.32	620.826	814.247	620.982	810.054	619.29	804.237	618.885	807.894	618.396	813.203	622.942	814.023	620.148	818.992	617.793	822.211	620.131	822.953	621.743	820.772	624.966	823.196	628.749	820.976	635.395	824.019	628.097	818.267	628.379	817.075	630.685	814.806	628.018	811.137	624.018	808.844	620.109	812.986	619.059	804.98	619.644	808.868	616.615	814.015	621.6
816.741	620.03	811.187	617.619	813.945	620.38	813.467	620.948	809.524	618.797	804.004	619.551	807.118	618.36	812.892	622.4	813.32	619.964	818.977	617.013	822.054	619.439	822.823	621.087	820.196	625.378	823.726	629.054	820.209	635.485	824.371	628.787	818.232	629.193	816.509	631.095	814.273	627.498	810.303	623.929	808.01	620.116	812.312	618.649	804.435	619.955	808.011	616.621	814.081	620.693
816.062	619.925	810.845	617.124	813.485	619.951	812.93	620.629	808.802	618.534	803.557	619.854	806.341	618.375	812.537	622.001	812.888	619.522	818.208	617.002	821.571	619.107	822.235	620.865	819.426	625.578	824.281	629.486	819.435	635.473	824.516	629.557	817.99	629.969	815.723	631.241	813.527	627.176	809.466	623.875	807.178	620.167	811.538	618.423	804.095	620.474	807.221	616.886	813.693	620.146
815.947	619.3	810.344	616.663	812.681	620.025	812.784	619.956	808	618.435	803.197	620.259	805.567	618.444	811.751	622.066	812.697	618.954	817.425	617.001	820.862	619.032	821.891	620.397	818.632	625.682	824.435	630.243	818.668	635.352	824.57	630.342	817.328	630.403	814.898	631.238	812.745	626.941	808.628	623.85	806.354	620.285	810.729	618.295	803.612	620.856	807.023	617.636	813.208	619.703
815.541	618.965	809.604	616.488	812.195	619.698	811.972	619.981	807.19	618.42	802.867	620.707	804.813	618.62	811.02	621.898	812.041	618.821	817.015	616.621	820.201	618.922	821.536	619.93	817.831	625.722	824.479	631.021	818.133	634.884	824.551	631.13	816.549	630.549	814.073	631.19	811.944	626.776	807.79	623.86	805.547	620.489	809.911	618.226	803.209	621.307	806.447	617.898	812.784	619.232
814.975	618.786	808.845	616.424	811.792	619.225	811.207	619.908	806.382	618.486	802.362	620.926	804.236	619.021	810.964	621.175	811.862	618.223	816.804	616.037	820.028	618.276	820.945	619.696	817.03	625.718	824.422	631.798	817.822	634.337	824.456	631.911	815.767	630.426	813.248	631.122	811.136	626.661	806.953	623.908	804.764	620.766	809.091	618.205	802.798	621.772	806.12	618.438	812.279	618.827
814.948	618.065	808.083	616.428	811.239	618.921	810.925	619.361	805.604	618.695	801.959	621.458	803.851	619.533	810.938	620.416	811.384	617.909	816.064	615.986	819.426	618.088	821.023	618.888	816.23	625.671	824.229	632.525	817.452	633.977	824.212	632.654	815.178	630.007	812.425	631.043	810.323	626.582	806.119	623.992	804.022	621.144	808.271	618.221	802.171	622.02	805.65	618.838	811.909	618.286
814.308	617.993	807.324	616.5	810.419	618.989	810.555	618.794	805.136	619.207	801.881	622.171	803.603	620.019	810.607	619.949	810.98	617.536	816.002	615.258	819.125	617.583	820.885	618.166	815.436	625.567	823.704	632.991	816.686	634.055	823.592	632.935	814.959	629.312	811.602	630.961	809.508	626.533	805.291	624.116	803.381	621.669	807.453	618.28	801.367	621.99	805.196	619.255	811.281	617.928
813.576	617.995	806.578	616.657	809.601	619.068	809.803	618.508	804.767	619.704	801.945	622.949	803.068	620.289	809.986	619.791	811.008	616.761	815.441	615.021	818.727	617.17	820.342	617.882	814.663	625.377	823.212	633.272	816.105	633.784	823.18	633.332	814.408	629.082	810.779	630.883	808.691	626.518	804.471	624.292	802.861	622.308	806.641	618.391	800.997	622.549	804.828	619.756	810.394	618.018
812.978	617.841	806.094	617.166	809.12	618.674	808.986	618.388	804.375	620.08	802.029	623.727	802.775	620.76	810.114	619.001	810.876	616.067	815.043	614.63	818.213	616.875	819.911	617.502	814.071	624.897	822.835	633.679	815.827	633.257	822.864	633.787	814.101	628.547	809.955	630.813	807.876	626.569	803.687	624.588	802.457	623.026	805.855	618.596	800.521	622.851	804.26	620.056	810.067	617.455
812.97	617.109	805.792	617.671	808.756	618.136	808.161	618.351	803.991	620.525	802.081	624.506	802.358	621.132	809.999	618.233	810.263	615.903	814.842	613.983	818.022	616.257	819.667	616.938	813.872	624.281	822.48	634.12	815.376	632.965	822.28	634.021	813.651	628.198	809.13	630.757	807.066	626.668	803.03	625.079	802.157	623.798	805.217	618.981	800.004	623.329	803.927	620.684	809.589	616.804
812.364	616.972	805.481	618.085	808.356	618.034	807.336	618.375	803.579	620.912	801.628	624.84	801.933	621.501	809.499	617.722	809.951	615.418	814.184	613.573	817.407	616.067	818.985	616.829	813.443	623.925	822.014	634.404	814.634	632.994	822.098	634.59	813.157	627.826	808.303	630.739	806.265	626.82	802.662	625.772	801.957	624.609	804.939	619.649	799.77	624.062	804.033	621.548	808.761	616.554
811.985	616.612	804.965	618.348	807.925	618.514	806.517	618.462	803.165	621.319	801.132	625.223	801.991	622.274	808.769	617.446	809.647	614.856	813.407	613.401	817.12	615.56	818.876	616.125	812.943	623.623	821.762	635.067	814.029	632.77	821.642	635.089	812.828	627.2	807.496	630.858	805.486	627.056	802.727	626.504	801.876	625.438	804.45	619.89	799.758	624.921	803.517	621.863	807.854	616.509
811.844	616.015	804.735	618.871	807.627	619.075	805.729	618.661	802.762	621.702	800.778	625.779	801.774	622.811	807.978	617.335	808.898	614.685	812.617	613.294	816.717	615.16	818.227	615.993	812.792	622.982	821.118	635.337	813.826	632.173	820.984	635.392	812.827	626.379	807.094	631.361	804.756	627.41	803.247	627.016	801.832	626.271	804.058	620.393	799.803	625.78	803.007	622.353	806.955	616.617
811.135	615.975	804.293	619.188	806.808	619.047	805.113	619.064	802.323	622.08	800.688	626.553	801.255	623.115	807.177	617.331	808.158	614.929	811.822	613.235	816.238	614.849	817.474	615.947	812.061	622.881	820.346	635.387	813.298	631.946	820.205	635.488	812.901	625.56	806.712	631.821	804.116	627.911	804.027	627.069	801.832	627.105	803.97	621.106	799.879	626.638	802.77	623.1	806.246	617.023
810.407	615.973	803.885	619.54	805.99	618.96	805.018	619.824	801.838	622.537	800.672	627.335	800.742	623.514	806.383	617.433	808.016	615.611	811.024	613.212	816.072	614.275	816.964	615.638	811.939	622.207	819.607	635.258	812.526	632.006	819.416	635.478	812.989	624.741	806.204	632.116	803.717	628.611	804.325	627.84	801.875	627.938	803.838	621.718	799.962	627.494	802.747	623.967	805.82	617.619
810.004	615.648	803.623	620.041	805.171	618.889	804.322	619.924	801.791	623.344	800.684	628.117	800.475	624.238	805.626	617.665	807.577	615.956	810.226	613.221	815.516	613.755	816.82	614.969	812.003	621.411	819.014	634.845	811.757	632.089	818.648	635.315	813.078	623.923	806.005	632.755	803.523	629.389	804.492	628.656	801.945	628.769	803.31	622.025	800.047	628.351	802.78	624.836	805.423	618.111
809.889	615.003	803.088	620.276	804.437	619	803.529	619.917	801.823	624.154	800.714	628.898	800.316	624.999	805.138	618.138	806.819	615.975	809.429	613.278	814.786	613.485	816.015	614.977	812.026	620.63	818.876	634.201	811.093	631.857	818.176	634.843	813.154	623.104	805.362	632.938	803.483	630.197	804.594	629.488	802.035	629.599	802.758	622.495	800.128	629.208	802.838	625.705	804.892	618.504
809.252	614.697	802.791	620.733	803.905	619.398	803.049	620.318	801.888	624.964	800.757	629.679	800.202	625.769	804.907	618.762	806.076	616.014	808.639	613.389	813.998	613.338	815.266	614.931	811.831	619.939	818.323	634.013	810.854	631.311	817.822	634.306	813.196	622.284	805.094	633.502	803.551	631.008	804.651	630.324	802.158	630.425	802.59	623.279	800.185	630.067	802.912	626.572	804.528	619.042
808.532	614.613	802.394	621.116	803.701	619.972	802.95	621.081	801.967	625.772	800.804	630.46	800.119	626.543	804.324	618.978	806.02	616.756	807.866	613.578	813.199	613.256	814.971	614.414	811.094	619.891	817.585	633.986	810.497	630.908	817.388	633.941	813.145	621.467	804.629	633.857	803.686	631.813	804.67	631.162	802.288	631.249	802.557	624.095	800.192	630.926	802.992	627.439	803.904	619.399
807.809	614.691	801.932	621.444	803.076	620.227	802.954	621.801	802.049	626.58	800.861	631.24	800.058	627.319	803.541	618.942	805.434	616.958	807.223	613.927	812.396	613.216	814.653	613.817	811.013	619.226	816.976	633.777	809.94	630.694	816.602	634.017	812.616	621.041	804.15	634.22	803.862	632.611	804.656	632.001	802.432	632.072	802.636	624.907	799.993	631.657	803.072	628.306	803.941	620.309
807.171	614.946	802.005	622.204	802.972	620.9	802.268	621.942	802.121	627.389	800.92	632.02	800.005	628.095	803.133	619.347	805.065	617.375	806.958	614.609	811.591	613.215	813.9	613.535	810.969	618.465	816.89	633.085	809.824	630.062	815.815	634.087	812.244	620.653	803.97	634.897	804.007	633.413	804.6	632.837	802.584	632.892	802.899	625.604	799.449	632.101	803.146	629.173	804.05	621.216
807.053	615.613	801.802	622.756	802.878	621.593	802.004	622.579	802.144	628.2	800.98	632.8	799.98	628.873	802.759	619.777	804.808	617.904	806.495	614.888	810.788	613.25	813.099	613.406	810.649	617.955	816.224	633.002	809.209	629.89	815.258	633.828	811.879	620.146	804.054	635.718	803.666	633.819	804.485	633.666	802.737	633.713	803.456	626.019	798.925	632.455	803.208	630.041	803.762	621.872
806.571	615.88	801.337	623.101	802.495	622.057	802.004	623.359	801.827	628.764	801.042	633.579	799.96	629.652	802.257	620.056	804.128	618.009	806.158	615.349	809.988	613.334	812.288	613.36	809.986	617.826	815.489	632.963	808.875	629.381	814.868	633.357	811.341	619.633	803.423	635.925	803.163	634.182	804.244	634.458	802.891	634.533	804.116	626.294	798.997	633.31	803.246	630.91	803.094	622.189
805.917	615.946	800.83	623.443	801.869	622.328	801.709	623.825	801.308	629.147	801.103	634.359	799.951	630.43	801.933	620.631	804.04	618.704	805.766	615.755	809.199	613.482	811.476	613.368	809.927	617.082	814.974	632.686	808.808	628.617	814.493	632.895	810.55	619.417	803.065	636.444	802.88	634.819	803.726	634.908	803.026	635.357	804.391	627.008	799.07	634.166	803.239	631.778	802.791	622.895
805.224	615.961	800.721	624.198	801.721	623.13	801.122	624.106	800.84	629.567	801.162	635.139	799.955	631.208	802.004	621.418	803.479	618.929	805.295	616.077	808.454	613.73	810.668	613.438	809.304	616.713	814.901	631.977	808.849	627.84	813.706	632.943	809.734	619.309	802.995	637.175	802.94	635.633	803.131	635.178	803.103	636.186	804.533	627.814	798.791	634.776	803.109	632.603	802.749	623.804
804.979	616.569	800.705	624.961	801.701	623.951	800.747	624.765	800.744	630.368	801.218	635.919	799.966	631.987	801.651	621.799	803.1	619.336	804.962	616.601	807.996	614.309	809.88	613.603	808.535	616.599	814.125	632.006	808.925	627.066	812.921	633.032	808.912	619.269	802.827	637.772	803.034	636.445	802.966	635.886	802.819	636.76	804.612	628.63	798.284	635.191	802.516	633.01	802.778	624.716
804.994	617.272	800.724	625.725	801.723	624.774	800.653	625.583	800.75	631.179	801.27	636.7	799.992	632.765	801.108	622.143	802.856	619.881	805.038	617.385	807.704	614.8	809.157	613.923	807.754	616.696	813.38	631.97	809.007	626.292	812.134	633.1	808.09	619.276	802.244	638.031	803.083	637.26	803.058	636.719	802.304	637.156	804.646	629.45	797.942	635.714	802.057	633.423	802.839	625.627
804.831	617.791	800.765	626.489	801.764	625.596	800.62	626.407	800.78	631.99	801.315	637.48	800.028	633.543	800.63	622.704	802.133	619.951	804.686	617.836	807.299	615.187	809.033	614.648	807.08	617.005	812.977	631.585	809.085	625.518	811.432	633.005	807.269	619.33	801.847	638.621	802.787	637.785	803.061	637.551	801.921	637.642	804.633	630.271	798.013	636.57	802.035	634.189	802.914	626.537
804.289	618.005	800.817	627.252	801.818	626.418	800.623	627.232	800.827	632.801	801.349	638.262	800.074	634.32	800.414	623.475	802.04	620.677	804.271	618.224	806.871	615.577	808.48	614.892	807.023	617.767	812.801	630.99	809.15	624.743	810.926	632.603	806.456	619.441	801.814	639.433	802.253	638.131	802.567	637.892	802.003	638.472	804.568	631.088	798.084	637.417	801.759	634.771	802.995	627.447
804.085	618.542	800.877	628.014	801.884	627.239	800.647	628.058	800.886	633.611	801.371	639.044	800.132	635.096	800.286	624.267	801.493	620.899	803.939	618.672	806.539	616.048	808.119	615.341	806.408	617.946	812.025	631.056	809.177	623.967	810.683	632.1	805.658	619.632	801.855	640.257	801.874	638.665	802.084	638.302	802.084	639.303	804.434	631.896	797.669	637.957	801.251	635.193	803.077	628.357
803.644	618.832	800.941	628.776	801.954	628.059	800.684	628.883	800.951	634.42	801.369	639.825	800.216	635.87	800.188	625.063	800.927	621.242	803.442	619.04	806.046	616.361	807.802	615.85	805.649	617.969	811.26	631.005	809.003	623.236	810.217	631.771	805.073	620.124	801.925	641.081	801.904	639.48	801.915	639.02	801.733	639.83	804.128	632.607	797.114	638.289	800.93	635.764	803.152	629.267
803.21	619.157	801.006	629.537	802.026	628.879	800.728	629.707	801.019	635.23	801.33	640.605	800.314	636.642	800.112	625.862	800.56	621.926	802.662	618.96	805.718	616.836	807.177	616.044	805.107	618.217	810.955	630.489	808.466	622.947	809.827	631.386	804.832	620.737	802.008	641.904	801.985	640.293	801.992	639.855	801.228	640.222	803.606	633.069	797.019	638.979	801.01	636.63	803.216	630.178
802.954	619.704	801.068	630.299	802.096	629.7	800.783	630.531	801.086	636.039	801.222	641.377	800.442	637.409	800.058	626.663	800.356	622.692	802.179	619.284	805.285	617.205	807.04	616.724	804.927	618.845	810.944	629.719	807.983	622.681	809.47	630.961	804.306	620.956	802.094	642.727	802.07	641.106	802.088	640.689	800.934	640.763	802.976	633.241	796.868	639.682	801.081	637.48	803.26	631.09
803.048	620.443	801.125	631.062	802.161	630.52	800.84	631.355	801.151	636.848	800.784	641.888	800.624	638.161	800.026	627.464	800.219	623.475	801.791	619.702	804.866	617.587	806.436	616.929	804.262	618.949	810.928	629.015	808.035	621.909	808.863	630.674	803.531	620.974	802.17	643.55	802.125	641.92	802.095	641.521	801.012	641.593	803.039	634.057	796.425	640.143	800.606	637.956	803.242	632.002
802.7	620.834	801.168	631.825	802.221	631.341	800.901	632.178	801.211	637.658	800.307	642.233	800.96	638.842	800.001	628.267	800.121	624.264	801.363	620.053	804.546	618.066	806.11	617.406	804.028	619.56	810.175	628.991	807.977	621.156	808.809	629.889	802.93	621.296	802.213	644.376	802.031	642.646	801.594	641.885	801.096	642.423	802.913	634.783	795.92	640.484	800.052	638.331	802.942	632.799
802.258	621.161	801.185	632.589	802.268	632.163	800.963	633.001	801.263	638.469	800.019	642.659	801.629	638.971	799.997	629.069	800.048	625.055	800.927	620.504	804.029	618.346	805.753	617.846	804.004	620.312	809.765	628.434	807.382	620.974	808.829	629.101	802.943	622.11	802.187	645.2	801.472	642.996	801.14	642.313	800.68	642.935	802.363	635.075	795.614	641.038	799.965	639.066	802.301	633.125
802.001	621.652	801.13	633.332	802.285	632.986	801.026	633.825	801.297	639.28	800.096	643.423	802.128	639.367	800.004	629.872	799.99	625.848	800.997	621.281	803.723	618.842	805.195	618.088	803.787	620.846	809.569	627.704	806.974	620.613	808.89	628.313	802.865	622.813	801.865	645.796	801.021	643.423	800.996	643.001	800.155	643.273	801.948	635.484	795.016	641.312	800.054	639.932	801.977	633.676
801.511	621.85	800.84	633.968	802.255	633.807	801.088	634.648	801.307	640.091	799.723	643.972	802.376	640.085	800.018	630.675	799.946	626.642	800.725	621.751	803.283	619.207	805.064	618.753	803.184	621.039	809.521	626.925	806.837	619.935	808.97	627.527	802.296	623.073	801.331	646.17	800.974	644.137	800.968	643.728	799.99	643.89	801.973	636.3	794.733	641.817	799.913	640.652	802.039	634.58
801.072	622.255	800.216	634.122	802.072	634.575	801.15	635.471	801.264	640.9	799.042	644.03	802.459	640.858	800.05	631.477	799.922	627.437	800.218	622.109	802.862	619.593	804.411	618.985	802.996	621.712	809.565	626.144	806.17	619.598	809.057	626.742	801.786	623.498	800.993	646.608	801.054	644.95	800.339	643.942	799.902	644.595	802.073	637.113	794.163	642.161	799.434	641.122	802.021	635.449
800.772	622.838	799.776	634.549	801.624	635.084	801.207	636.295	801.037	641.622	798.388	644.124	802.43	641.635	800.093	632.278	799.905	628.232	799.687	622.57	802.53	620.067	803.639	618.974	803.044	622.493	809.785	625.4	805.407	619.528	809.129	625.954	801.609	624.285	800.489	646.944	800.956	645.643	799.953	644.526	799.504	645.069	801.939	637.881	793.773	642.759	798.953	641.506	801.638	636.056
800.706	623.578	799.576	635.274	800.953	635.216	801.261	637.119	800.574	642.132	797.919	644.459	802.254	642.378	800.152	633.079	799.899	629.027	799.45	623.329	802.006	620.352	803.156	619.265	802.641	622.879	810.357	625.099	804.672	619.677	809.165	625.166	801.634	625.099	800.131	647.412	800.468	646.048	799.928	645.309	798.904	645.353	801.298	638.073	793.657	643.606	799.064	642.369	800.968	636.275
800.716	624.323	799.508	636.035	801.012	636.035	801.309	637.943	799.951	642.267	797.665	644.983	801.832	642.867	800.231	633.877	799.906	629.822	799.325	624.116	801.719	620.849	802.863	619.814	802.17	623.228	810.859	624.757	804.117	620.083	809.032	624.449	801.942	625.843	799.695	647.799	800.015	646.435	800.016	646.143	798.908	646.183	800.962	638.552	793.629	644.466	798.698	642.953	800.804	637.013
800.745	625.067	799.514	636.799	800.92	636.798	801.348	638.768	800.041	643.072	797.167	645.262	801.221	643.074	800.331	634.673	799.917	630.617	799.24	624.91	801.234	621.194	802.217	620.027	801.931	623.792	811.052	624.126	803.892	620.776	808.64	623.906	802.648	625.992	799.272	648.199	800.03	647.183	800.087	646.977	798.99	647.012	800.99	639.359	793.644	645.326	798.151	643.271	799.987	637.107
800.791	625.811	799.573	637.56	800.358	637.076	801.381	639.593	799.871	643.759	796.82	645.712	801.073	643.676	800.456	635.466	799.947	631.412	799.184	625.706	800.949	621.704	801.409	619.942	801.288	623.944	810.967	623.346	804.023	621.542	808.018	623.766	802.973	626.495	798.906	648.657	799.791	647.764	799.983	647.702	799.069	647.842	801.061	640.169	793.684	646.186	797.781	643.754	799.934	637.995
800.85	626.554	799.729	638.295	799.854	637.458	801.383	640.419	799.414	644.134	796.369	646.01	800.513	643.906	800.654	636.242	799.982	632.206	799.152	626.504	800.947	622.447	801.095	620.457	801.012	624.538	810.934	622.564	803.599	621.864	807.98	623.062	803.006	627.282	798.419	648.992	799.353	648.176	799.383	648.011	798.963	648.571	800.939	640.945	793.732	647.045	797.303	644.162	800.033	638.9
800.915	627.297	800.039	638.968	799.779	638.227	801.356	641.243	798.927	644.431	795.611	645.931	800.15	644.324	801.094	636.821	800.029	633	799.15	627.303	800.682	622.982	800.656	620.843	800.984	625.281	811.309	622.141	803.194	622.236	808.051	622.278	803.15	627.94	798.079	649.475	798.926	648.547	799.015	648.519	798.547	649.075	800.238	641.054	793.793	647.904	796.956	644.671	799.955	639.748
800.982	628.039	800.743	639.014	800.038	638.955	801.262	642.058	798.728	645.036	794.993	646.238	799.87	644.832	801.685	637.154	800.093	633.792	799.179	628.101	800.019	623.203	800.19	621.19	800.775	625.816	811.838	621.824	802.923	622.741	808.02	621.54	803.894	627.996	797.632	649.848	798.541	648.965	799.032	649.295	797.902	649.303	800.017	641.624	793.859	648.762	796.95	645.476	799.328	640.037
801.048	628.782	801.183	639.492	800.8	639.004	800.981	642.73	798.074	645.192	794.944	646.929	799.247	645.046	802.228	637.489	800.166	634.584	799.229	628.898	799.653	623.811	799.927	621.749	800.175	626.041	812.133	621.328	802.357	622.945	807.735	620.933	804.305	628.66	797.224	650.265	798.067	649.359	798.72	649.806	797.912	650.136	799.989	642.409	793.928	649.62	796.619	646.064	798.969	640.606
801.111	629.525	801.42	640.19	801.239	639.594	800.393	643.077	797.844	645.776	794.865	647.583	798.475	644.972	802.459	638.251	800.265	635.373	799.304	629.692	799.479	624.588	799.34	621.926	799.703	626.605	811.523	621.06	802.09	623.475	807.105	620.819	804.513	629.437	796.827	650.685	798.01	650.059	798.237	650.207	797.987	650.966	799.745	642.997	793.999	650.478	795.886	646.25	799.001	641.506
801.161	630.268	801.513	640.948	801.449	640.368	800.027	643.511	797.372	646.124	794.541	648.043	798.131	645.387	802.56	639.047	800.395	636.157	799.418	630.482	799.403	625.387	798.826	622.438	799.516	627.37	811.169	620.631	801.668	623.792	806.896	620.215	804.617	630.252	796.38	651.055	797.847	650.691	797.961	650.786	798.067	651.797	799.026	643.086	794.071	651.335	796.149	646.871	799.026	642.393
801.197	631.013	801.529	641.712	801.523	641.186	800.061	644.278	796.903	646.471	793.904	648.249	797.785	645.853	802.614	639.847	800.573	636.929	799.602	631.26	799.385	626.191	798.56	623.154	799.416	628.164	810.78	620.234	801.148	624.083	806.434	619.793	804.665	631.073	795.925	651.507	797.419	651.119	798.029	651.59	797.977	652.547	798.966	643.841	794.14	652.193	796.834	647.107	798.683	642.985
801.202	631.756	801.477	642.472	801.526	642.009	799.752	644.807	796.672	647.05	793.763	649.002	797.168	646.065	802.63	640.649	800.844	637.641	800.058	631.855	799.432	626.994	798.461	623.958	799.369	628.964	810.351	619.873	800.669	624.624	805.697	619.744	804.664	631.896	796.012	652.317	796.962	651.471	797.512	651.933	797.582	653.077	798.321	644.011	794.207	653.052	797.293	647.69	798.017	643.223
801.147	632.496	801.325	643.211	801.453	642.828	799.295	645.205	795.997	647.198	793.732	649.778	796.396	645.971	802.61	641.451	801.439	637.965	800.662	632.117	799.547	627.787	798.446	624.769	799.363	629.766	810.068	619.44	800.474	625.374	805.004	620.034	804.618	632.717	795.699	652.812	796.612	651.882	797.046	652.386	796.918	653.257	798.004	644.509	794.265	653.91	797.514	648.525	797.982	644.111
800.688	632.854	801.013	643.834	801.195	643.598	798.907	645.623	795.994	647.949	793.758	650.56	795.623	645.935	802.549	642.25	802.015	638.311	801.053	632.521	799.802	628.525	798.503	625.58	799.403	630.567	809.661	618.859	800.351	626.139	804.996	620.812	804.513	633.533	795.156	653.186	796.066	652.257	796.947	653.101	796.822	654.077	797.675	644.993	794.315	654.77	797.639	649.384	797.945	644.953
800.204	633.202	800.342	643.976	800.594	643.909	798.465	646.007	795.894	648.668	793.805	651.34	795.164	646.262	802.407	643.038	802.353	638.91	801.063	633.314	800.278	629.035	798.693	626.366	799.495	631.364	809.018	618.517	800.271	626.912	804.412	621.012	804.315	634.327	794.743	653.704	795.797	652.896	797.025	653.935	796.847	654.908	796.974	645.134	794.353	655.629	797.715	650.251	797.099	644.998
799.833	633.657	800.115	644.489	800.146	644.314	798.071	646.442	795.485	649.088	793.865	652.12	794.853	646.746	802.073	643.742	802.496	639.689	800.987	634.109	801.023	629.087	799.192	626.832	799.654	632.147	808.261	618.336	800.22	627.689	803.997	621.388	803.854	634.826	794.798	654.483	795.769	653.709	796.938	654.638	796.914	655.74	796.72	645.896	794.369	656.49	797.752	651.121	796.796	645.802
799.804	634.401	799.718	644.83	800.024	645.002	797.646	646.827	794.94	649.357	793.935	652.899	794.321	646.959	801.485	644.063	802.568	640.48	800.927	634.905	801.108	629.873	799.746	627.194	800.023	632.73	807.484	618.246	800.198	628.466	803.972	622.152	803.236	635.117	795.303	654.998	795.816	654.525	796.439	655.023	796.995	656.57	796.647	646.711	794.346	657.349	797.749	651.991	796.736	646.704
799.83	635.146	799.207	645.084	800.015	645.757	797.208	647.243	794.886	650.155	794.007	653.678	794.069	647.513	801.005	644.343	802.581	641.274	801.036	635.627	801.092	630.673	800.102	627.69	800.62	633.066	806.7	618.231	800.208	629.244	804.003	622.935	802.859	635.671	795.901	655.251	795.886	655.339	795.92	655.442	797.078	657.401	796.631	647.531	794.264	658.203	797.715	652.86	796.757	647.616
799.879	635.889	798.98	645.685	799.359	645.964	796.973	647.834	794.979	650.962	794.079	654.457	793.625	647.81	801.085	645.132	802.542	642.067	801.465	636.048	801.032	631.475	800.083	628.502	801.201	633.416	805.92	618.293	800.234	630.022	803.291	622.991	802.846	636.493	796.047	655.907	795.966	656.152	795.869	656.238	797.157	658.232	796.648	648.352	793.912	658.958	797.647	653.727	796.809	648.527
799.941	636.632	799.036	646.431	799.111	646.521	796.971	648.58	795.061	651.77	794.148	655.236	793.114	648.141	800.952	645.886	802.429	642.85	802.141	636.221	800.958	632.276	800.012	629.312	801.424	634.166	805.157	618.445	800.277	630.798	802.889	623.492	802.88	637.314	795.989	656.729	796.05	656.965	795.927	657.073	797.22	659.064	796.683	649.172	793.231	659.14	797.524	654.588	796.88	649.438
800.009	637.375	798.702	646.842	798.627	646.882	796.514	648.983	795.001	652.529	794.206	656.016	792.663	648.686	800.29	646.031	802.169	643.557	802.431	636.96	800.881	633.078	799.932	630.122	801.556	634.954	804.459	618.741	800.34	631.574	802.731	624.236	802.936	638.136	796.022	657.486	796.129	657.779	796.015	657.907	797.23	659.899	796.727	649.992	792.898	659.657	797.269	655.401	796.959	650.348
800.077	638.117	798.236	647.151	797.915	646.969	796.055	649.392	794.644	653.047	794.242	656.797	792.485	649.44	799.513	646.04	801.678	644.089	802.582	637.741	800.82	633.88	799.861	630.932	801.638	635.752	803.908	619.24	800.453	632.344	802.706	625.025	803.004	638.956	796.358	658.049	796.193	658.593	796.102	658.741	797.018	660.655	796.787	650.81	792.476	660.087	796.759	655.935	797.04	651.257
800.143	638.859	798.026	647.693	797.217	647.051	796.009	650.11	793.933	653.16	794.244	657.578	792.397	650.212	798.984	646.297	801.116	644.262	802.678	638.533	800.796	634.684	799.825	631.743	801.684	636.552	803.916	620.015	800.622	633.102	802.726	625.815	803.076	639.776	797.069	658.213	796.232	659.409	796.166	659.576	796.52	661.084	796.848	651.629	791.955	660.41	796.071	656.113	797.118	652.167
800.203	639.602	797.479	647.892	796.901	647.696	795.814	650.712	793.886	653.967	794.163	658.335	792.356	650.988	798.883	646.994	800.815	644.76	802.73	639.329	800.899	635.456	799.903	632.508	801.698	637.354	803.862	620.697	800.979	633.692	802.776	626.604	803.146	640.596	797.374	658.919	796.2	660.224	796.166	660.414	795.963	661.327	796.914	652.447	791.717	661.038	795.911	656.926	797.184	653.078
800.249	640.346	797.119	648.338	797.022	648.51	795.355	651.12	793.94	654.775	793.871	659	792.353	651.766	798.137	647.047	800.395	645.142	802.745	640.128	801.278	635.966	800.363	633.006	801.665	638.156	803.484	621.08	801.53	634.074	802.833	627.392	803.21	641.417	797.483	659.729	795.85	660.842	795.702	660.949	795.826	662.02	796.982	653.265	790.869	661.064	795.986	657.793	797.227	653.99
800.27	641.091	796.987	648.97	796.576	648.861	794.924	651.562	794.022	655.583	793.207	659.119	792.382	652.543	797.973	647.675	799.913	645.449	802.721	640.926	801.971	636.06	800.903	633.299	801.595	638.954	802.941	621.33	802.139	634.316	802.896	628.18	803.26	642.238	797.459	660.551	795.345	661.195	795.215	661.292	795.099	662.11	797.049	654.083	790.015	660.953	796.075	658.659	797.228	654.902
800.245	641.833	797.031	649.686	796.125	649.295	794.999	652.382	794.099	656.391	793	659.645	792.465	653.317	797.49	647.98	799.711	646.037	802.656	641.721	802.015	636.846	801.017	633.941	801.47	639.743	802.829	622.009	802.404	635.013	802.963	628.968	803.282	643.061	797.292	661.344	794.897	661.543	794.807	661.701	794.926	662.777	797.117	654.901	789.229	661.054	796.143	659.526	797.067	655.793
800.121	642.529	796.476	649.926	795.936	649.955	795.077	653.203	794.122	657.191	792.994	660.394	792.62	654.078	796.723	648.004	799.103	646.224	802.541	642.51	801.999	637.637	801.122	634.606	801.23	640.478	802.161	622.139	802.576	635.769	803.03	629.755	803.254	643.881	796.904	662.032	794.59	662.068	794.409	662.143	794.354	663.048	797.181	655.719	788.947	661.648	796.108	660.386	796.311	655.965
799.677	642.991	796.139	650.372	796.024	650.772	794.794	653.789	793.951	657.936	792.814	661.039	792.961	654.683	796.036	648.118	798.825	646.702	802.333	643.27	802.457	637.964	801.529	635.047	800.758	641.048	801.876	622.618	802.698	636.536	803.091	630.543	803.101	644.642	796.11	662.054	794.028	662.309	793.948	662.509	793.528	663.006	797.24	656.538	788.47	662.003	795.715	660.918	795.955	656.605
799.234	643.276	796.039	650.995	796.085	651.592	794.341	654.197	793.231	658.029	792.088	661.102	793.515	655.071	795.979	648.853	798.409	647.08	801.957	643.895	803.087	638.227	802.2	635.303	800.135	641.213	801.537	623.047	802.794	637.308	803.147	631.331	802.51	645.023	795.949	662.722	793.763	662.902	793.603	663.052	792.711	662.956	797.292	657.357	787.632	662.001	795.114	661.195	795.93	657.476
798.859	643.616	796.036	651.691	795.539	651.918	793.904	654.565	793.003	658.59	791.993	661.742	794.122	655.323	795.331	648.994	797.877	647.406	801.23	643.979	803.426	638.937	802.456	636.067	800.027	641.832	800.92	623.246	802.857	638.084	803.186	632.121	802.111	645.422	795.444	663.045	793.117	663.009	792.78	662.97	791.975	663.113	797.336	658.177	786.979	662.225	794.999	661.951	796.015	658.385
798.533	644.04	795.488	652.061	795.128	652.368	793.54	655.033	793.003	659.387	791.972	662.493	794.367	656.008	794.902	649.47	797.747	648.183	801.06	644.604	803.568	639.727	802.588	636.865	799.955	642.555	800.71	623.991	802.905	638.86	803.193	632.91	802.061	646.112	794.968	663.389	792.402	663.089	792.183	663.237	791.95	663.917	797.366	658.997	786.918	663.024	795.041	662.814	796.101	659.294
798.032	644.324	794.763	652.023	795.007	653.036	793.059	655.371	792.806	660.004	791.719	663.048	794.482	656.774	794.749	650.237	797.752	648.977	801.033	645.355	803.629	640.528	802.64	637.675	799.615	643.084	800.634	624.767	802.943	639.638	803.072	633.679	801.867	646.76	794.765	664.013	791.899	663.45	791.791	663.699	791.245	664.05	797.368	659.818	786.084	663.055	794.313	662.955	796.122	660.201
798.004	644.969	794.274	652.221	794.9	653.704	792.707	655.839	792.012	660.022	790.978	663.091	794.518	657.55	794.743	651.038	797.789	649.771	800.771	645.877	803.634	641.331	802.634	638.487	798.967	643.234	800.607	625.55	802.969	640.415	802.509	633.912	801.281	647.072	793.976	664.12	791.694	664.043	791.407	664.14	790.951	664.589	797.326	660.636	785.943	663.771	794.041	663.573	795.826	660.854
797.916	645.598	793.965	652.683	794.382	654.056	792.264	656.22	791.998	660.803	791.007	663.844	794.498	658.329	794.784	651.84	797.847	650.564	800.173	646.078	803.582	642.132	802.572	639.297	798.798	643.845	800.61	626.334	802.975	641.193	801.968	634.273	800.488	646.991	793.154	664.029	791.089	664.238	790.935	664.508	790.565	665.034	797.167	661.428	785.364	664.044	794.024	664.389	795.159	661.138
797.584	646.065	793.51	653.159	794.058	654.533	791.843	656.614	791.995	661.6	790.973	664.6	794.383	659.098	794.845	652.64	797.918	651.356	800.051	646.736	803.456	642.922	802.422	640.095	798.238	644.12	800.638	627.119	802.975	641.971	801.65	634.945	800.051	647.411	792.332	663.938	790.821	664.793	790.608	665.062	789.988	665.284	796.725	661.906	784.975	664.506	793.668	664.883	794.95	661.899
797.096	646.303	792.77	653.231	793.581	654.876	791.48	657.067	791.588	661.996	790.621	665.051	794.028	659.732	794.918	653.439	797.996	652.147	799.437	646.897	803.192	643.674	802.048	640.77	797.76	644.567	800.675	627.902	802.956	642.749	801.572	635.73	799.663	647.839	791.534	663.962	790.263	665.011	789.776	664.965	789.869	665.992	796.163	662.165	784.62	665.001	793.166	665.249	795.061	662.806
796.793	646.741	792.007	653.221	793.195	655.31	790.929	657.389	791.023	662.246	789.972	665.179	793.5	660.105	794.996	654.238	798.071	652.939	799.069	647.375	802.552	643.945	801.437	641.054	797.565	645.33	800.722	628.685	802.922	643.526	801.604	636.519	799.248	648.246	791.029	664.315	789.515	665.046	789.169	665.232	789.108	666.057	796.039	662.826	783.965	665.235	792.881	665.82	795.1	663.716
796.434	647.126	791.244	653.173	792.797	655.729	791.009	658.209	790.95	663.007	789.92	665.903	792.981	660.324	795.073	655.037	798.143	653.731	798.981	648.101	802.176	644.367	800.969	641.392	797.534	646.131	800.774	629.468	802.876	644.303	801.741	637.291	798.831	648.646	790.862	664.96	788.941	665.326	788.792	665.706	788.966	666.742	795.319	662.948	783.789	666.06	792.178	666.037	794.377	663.962
795.95	647.383	790.483	653.108	792.346	656.098	790.767	658.781	791.054	663.813	789.304	666.061	793.043	661.096	795.146	655.837	798.202	654.524	798.962	648.796	801.809	644.776	800.789	642.038	797.622	646.927	800.831	630.251	802.808	645.078	802.129	637.8	798.423	649.054	790.062	664.987	788.788	665.97	788.395	666.141	788.411	667.016	795.098	663.539	783.811	666.919	791.315	665.955	794.087	664.576
795.727	647.891	789.722	653.035	791.98	656.566	790.27	659.157	791.022	664.604	788.971	666.501	792.891	661.765	795.205	656.637	798.235	655.318	798.303	648.901	801.291	645.074	800.011	642.082	797.885	647.664	800.891	631.033	802.702	645.849	802.749	638.048	797.935	649.459	789.267	665.004	788.171	666.171	787.909	666.498	787.992	667.429	794.639	663.958	783.878	667.777	791.078	666.58	793.499	664.906
795.272	648.185	788.961	652.96	791.53	656.878	789.865	659.639	790.557	664.957	788.698	667.026	792.425	662.092	795.23	657.439	798.223	656.112	797.924	649.494	801.033	645.626	799.915	642.796	798.429	648.032	800.952	631.815	802.55	646.61	803.253	638.533	798.011	650.268	789.03	665.582	787.862	666.683	787.607	667.034	787.741	668.013	793.891	664.059	783.962	668.634	790.525	666.939	793.129	665.442
794.992	648.613	788.2	652.889	791.038	657.322	789.834	660.46	790.073	665.275	787.942	667.123	791.983	662.403	795.175	658.229	797.956	656.8	797.799	650.24	800.503	645.886	799.38	643.066	799.074	648.235	801.014	632.598	802.323	647.345	803.451	639.279	797.723	650.772	788.585	665.958	787.462	667.105	787.049	667.318	786.99	668.097	793.077	663.967	784.053	669.489	789.739	666.985	792.641	665.903
795.069	649.34	787.438	652.826	790.813	658.002	789.891	661.283	789.91	665.916	787.165	667.032	792.021	663.17	794.933	658.892	797.397	657.073	797.822	651.037	800.111	646.346	798.959	643.448	799.379	648.951	801.076	633.38	801.942	648.008	803.566	640.059	797.223	651.162	788.048	666.245	786.925	667.392	786.736	667.828	786.964	668.903	792.26	663.933	784.137	670.346	789.187	667.26	791.84	666.002
794.803	649.924	786.674	652.79	790.808	658.822	789.974	662.105	789.145	665.961	786.388	666.945	791.891	663.843	794.202	658.97	797.002	657.435	797.885	651.834	799.974	647.013	798.716	644.012	799.492	649.745	801.135	634.162	801.242	648.078	803.63	640.846	796.815	651.686	787.933	666.955	786.756	668.043	786.233	668.191	786.263	669.032	792.066	664.58	784.197	671.204	788.824	667.788	791.192	666.206
794.199	650.061	785.912	652.81	790.864	659.643	790.061	662.926	789.045	666.675	785.619	666.939	791.349	664.08	794.035	659.623	797.022	658.211	797.963	652.629	799.931	647.697	797.964	644.084	799.55	650.544	801.193	634.945	800.951	648.563	803.656	641.635	796.756	652.505	787.126	666.976	786.084	668.191	785.965	668.735	785.981	669.58	791.559	664.92	784.2	672.06	788.162	668.018	790.841	666.799
793.528	650.098	785.304	653.05	790.943	660.462	790.142	663.747	788.514	666.98	785	667.153	791.01	664.479	794.032	660.391	796.912	658.928	798.043	653.423	799.375	647.937	797.694	644.834	799.562	651.345	801.244	635.728	800.655	649.054	803.638	642.425	796.778	653.327	787.024	667.7	785.842	668.743	785.951	669.497	785.574	669.999	790.828	664.988	784.028	672.88	787.326	667.964	790.123	667.025
792.977	650.279	784.896	653.527	791.031	661.281	790.193	664.57	787.73	667	784.987	667.918	791.047	665.238	793.757	660.891	796.262	659.06	798.119	654.218	798.951	648.458	797.642	645.632	799.525	652.146	801.29	636.511	799.967	649.14	803.565	643.212	796.834	654.148	786.469	667.969	785.387	669.099	785.619	670.052	785.026	670.278	790.188	665.125	783.257	672.978	787.038	668.58	789.278	666.995
792.84	650.933	784.599	653.991	791.114	662.1	790.155	665.376	787.085	667.122	784.297	667.986	790.924	665.949	793.132	661.087	795.964	659.548	798.181	655.015	798.827	649.185	797.785	646.416	799.428	652.941	801.327	637.295	799.916	649.865	803.425	643.987	796.904	654.968	786.045	668.367	784.944	669.481	784.98	670.279	784.989	671.076	789.973	665.756	783.035	673.611	786.505	668.899	789.029	667.684
792.317	651.301	783.911	653.999	791.18	662.921	789.774	666.025	787.022	667.878	783.531	667.99	790.231	666.045	792.985	661.782	795.647	660.021	798.209	655.811	798.851	649.988	798.203	646.943	799.151	653.679	801.349	638.079	799.344	650.067	803.121	644.652	796.981	655.788	785.793	668.931	784.952	670.289	785.006	671.055	784.969	671.873	789.358	665.942	782.528	673.962	786.14	669.397	788.383	668.009
791.605	651.472	783.333	654.155	791.205	663.742	789.175	666.218	786.304	667.986	783.021	668.259	789.491	666.056	793.037	662.572	794.986	660.15	798.129	656.599	798.917	650.79	798.927	647.051	798.528	653.906	801.355	638.863	798.956	650.451	802.562	645.089	797.058	656.607	785.093	669.044	785.055	671.1	784.839	671.729	784.279	672.002	789.104	666.495	782.062	674.344	785.688	669.811	787.502	667.942
790.861	651.509	782.945	654.567	791.129	664.531	788.848	666.701	785.518	667.98	782.935	668.953	788.991	666.303	792.579	662.903	794.956	660.913	797.575	656.913	798.998	651.591	799.316	647.72	798.057	654.308	801.32	639.647	798.751	651.019	802.084	645.35	797.135	657.427	784.932	669.784	784.9	671.805	784.356	672.128	784.024	672.579	788.648	666.848	781.79	674.944	785.24	670.228	787.091	668.462
790.123	651.425	782.667	655.17	790.622	665.016	788.45	667.12	785.081	668.337	782.21	669.004	788.936	667.034	792.11	663.262	794.28	661.033	797.16	657.33	799.082	652.391	799.505	648.5	797.891	655.024	801.171	640.395	798.05	651.089	802.069	646.025	797.196	658.248	784.997	670.594	784.344	672.087	783.906	672.537	783.996	673.379	788.198	667.213	781.015	675.115	784.852	670.708	786.577	668.866
789.437	651.186	781.967	655.387	790.161	665.342	787.939	667.417	784.81	668.881	782.018	669.578	788.169	667.116	791.986	663.957	793.962	661.51	797.01	657.952	799.148	653.193	799.622	649.304	797.941	655.824	800.815	640.969	797.94	651.749	801.919	646.688	797.233	659.07	785.03	671.411	783.959	672.514	783.937	673.372	783.749	673.95	787.917	667.753	780.159	675.029	784.345	671.07	786.172	669.36
788.989	650.738	781.214	655.474	789.761	665.757	787.733	668.046	784.155	669.022	781.619	669.981	787.396	667.085	792.054	664.754	793.691	662.028	797.02	658.684	799.166	653.996	799.694	650.114	798.023	656.622	800.086	640.995	797.425	651.974	801.437	647.074	797.218	659.891	784.707	671.904	783.992	673.325	784.039	674.204	783.06	674.084	787.306	667.964	779.304	674.929	784.01	671.604	785.712	669.845
788.971	650.017	780.454	655.458	789.356	666.176	786.915	667.982	784.049	669.711	780.886	670.047	786.622	667.006	791.417	664.933	793.002	662.125	796.446	658.964	799	654.677	799.73	650.926	798.101	657.421	800.007	641.706	796.68	651.983	800.656	646.988	797.018	660.607	784.108	672.142	784.088	674.135	784.114	675.039	783.02	674.876	787.075	668.562	778.454	674.927	783.475	671.946	784.969	670.005
788.256	650.052	779.699	655.348	788.928	666.568	786.218	668.131	783.451	669.912	780.111	669.946	785.848	666.92	791.102	665.426	792.947	662.886	796.128	659.437	798.443	655.025	799.742	651.739	798.161	658.22	800.003	642.473	796.013	652.123	800.103	647.259	796.558	661.105	783.899	672.852	783.933	674.885	783.908	675.756	782.277	674.971	786.565	668.865	778.083	675.433	783.126	672.45	784.254	670.138
787.529	650.034	779.123	654.923	788.55	667.068	785.885	668.627	783.104	670.379	779.35	669.975	785.073	666.856	791.039	666.138	793.025	663.669	795.701	659.804	798.007	655.444	799.727	652.552	798.176	659.02	799.724	642.957	795.966	652.866	799.795	647.736	795.974	661.324	783.983	673.675	783.298	675.079	783.404	676.127	782.032	675.555	786.137	669.287	777.672	675.897	782.647	672.889	783.865	670.697
787.016	649.78	778.872	654.34	787.734	666.965	785.523	669.08	782.775	670.87	779.066	670.467	784.331	666.962	790.945	666.822	793.024	664.445	795.266	660.172	797.981	656.159	799.679	653.364	798.084	659.785	799.017	643.039	795.953	653.607	799.416	648.133	796.048	662.125	784.076	674.497	782.936	675.539	782.927	676.461	781.617	676.022	785.978	669.963	776.895	675.967	781.924	673.01	783.334	671.064
786.993	649.067	778.517	653.949	787.184	667.258	784.954	669.337	782.14	671.051	778.734	670.908	784.03	667.467	790.289	667.087	792.737	664.984	794.952	660.66	798.057	656.96	799.587	654.172	797.396	659.959	798.787	643.777	795.59	654	798.925	648.423	795.835	662.775	784.092	675.314	782.637	676.062	782.686	677.052	780.817	676.096	785.997	670.72	776.146	676.038	781.279	673.177	782.987	671.633
787.015	648.334	777.755	653.991	786.797	667.733	784.823	670.054	781.986	671.757	778.093	671.047	783.764	667.975	789.5	666.995	792.04	665.075	794.438	660.927	797.958	657.643	799.433	654.967	797.082	660.474	798.712	644.551	795.029	654.207	798.707	648.972	795.387	663.167	783.79	675.863	781.97	676.206	782.011	677.187	779.987	676.011	785.384	670.948	775.961	676.796	780.899	673.702	782.411	671.977
786.587	647.996	776.994	654.072	786.288	668.023	784.007	669.985	782.035	672.554	778.036	671.786	783.04	668.032	789.147	667.403	791.981	665.807	794.077	661.415	797.473	658.039	799.177	655.722	797.023	661.182	798.7	645.335	794.999	654.95	798.129	649.217	794.928	663.527	783.194	676.114	781.9	676.938	781.869	677.914	779.159	675.909	785.061	671.484	776.066	677.647	780.347	674.113	782.082	672.538
785.874	647.947	776.315	653.936	785.518	667.995	783.265	670.09	781.587	672.909	777.413	671.938	782.998	668.766	788.77	667.882	791.384	666	793.999	662.103	797.035	658.426	798.495	655.966	796.873	661.796	798.72	646.119	794.975	655.698	797.975	649.819	794.616	664.091	783.049	676.775	781.182	677.086	781.187	678.122	778.34	675.96	785.018	672.218	775.477	678.013	779.479	674.067	781.535	672.986
785.135	648.021	775.919	653.516	784.984	668.362	782.9	670.565	781.133	673.276	777.003	672.365	782.445	668.985	788.125	668.13	791.02	666.426	793.867	662.718	797.026	659.145	798.094	656.416	796.27	662.032	798.765	646.902	794.503	655.994	797.919	650.514	793.796	664.046	782.372	676.944	780.377	677.047	780.354	678.105	778.053	676.514	784.801	672.79	774.666	678.024	778.615	673.963	780.705	673.01
785.047	647.375	775.733	652.926	784.697	668.868	782.568	671.061	780.886	673.832	776.904	673.097	782.043	669.352	787.325	668.087	790.768	666.964	793.359	663.034	796.818	659.736	798.003	657.093	796.064	662.611	798.819	647.685	794.039	656.297	797.632	651.026	792.979	663.946	782.122	677.499	779.565	676.955	779.52	678.02	777.626	676.926	784.284	673.118	774.165	678.312	777.749	673.91	780.201	673.351
784.65	646.908	774.986	652.841	784.204	669.219	781.943	671.273	780.224	673.973	776.984	673.874	781.855	669.933	786.528	667.994	790.044	667.032	793.008	663.523	796.385	660.146	798.071	657.902	795.544	662.883	798.878	648.467	794.004	657.034	796.977	651.212	792.29	664.111	781.685	677.972	778.763	676.917	778.686	677.928	776.863	676.995	784.029	673.659	773.844	678.926	777.194	674.258	779.778	673.96
783.989	646.664	774.226	652.867	783.993	669.784	782.019	672.092	780.075	674.615	777.082	674.65	781.136	669.985	785.73	667.908	790.01	667.785	793.031	664.271	795.968	660.515	798.03	658.652	795.175	663.304	798.942	649.249	793.986	657.787	796.812	651.919	791.875	664.575	780.955	678.169	778.002	677.05	777.852	677.866	776.136	677.066	783.471	673.929	773.188	679.362	776.777	674.782	779.096	674.429
783.247	646.63	773.464	652.93	783.974	670.535	781.904	672.85	779.545	674.895	777.072	675.422	781.042	670.666	784.93	667.865	789.412	668.038	792.758	664.789	795.577	660.916	797.468	658.958	794.845	663.771	799.008	650.031	793.416	657.987	796.788	652.705	791.536	665.043	780.13	678.135	777.98	677.836	777.104	678.087	776.031	677.788	783.169	674.407	772.341	679.497	776.183	675.079	778.219	674.665
782.528	646.79	772.703	653.009	783.601	671.075	781.328	673.107	779.158	675.308	776.738	675.893	780.561	670.959	784.257	668.015	788.635	668.036	792.312	665.166	795.126	661.313	797.081	659.42	794.292	664.023	799.075	650.813	793.036	658.38	796.822	653.494	790.725	664.968	779.307	678.05	777.346	678.022	776.918	678.742	775.353	677.943	782.752	674.872	771.481	679.484	775.317	675.01	777.32	674.819
782.15	647.234	771.943	653.091	782.789	670.961	780.923	673.521	778.877	675.861	776.164	676.103	779.803	670.967	783.981	668.636	787.849	667.963	791.975	665.607	795	661.948	797.017	660.116	794.08	664.596	799.137	651.595	792.827	658.944	796.882	654.282	790.074	665.2	778.485	677.962	776.975	678.465	776.369	679.01	775.1	678.5	782.104	675.118	770.647	679.307	774.483	674.966	776.413	674.925
781.934	647.829	771.182	653.158	782.129	671.191	780.616	674.025	778.2	676.127	776.054	676.749	779.073	670.992	783.48	668.91	787.071	667.974	791.504	665.937	794.919	662.623	796.847	660.719	793.558	664.935	799.196	652.377	792.111	659.002	796.958	655.069	789.831	665.802	777.662	677.938	776.695	678.998	775.565	679.042	774.707	679.08	781.286	675.049	770.143	678.783	774.056	675.439	775.502	674.992
781.42	648.274	770.419	653.193	781.972	671.825	779.812	674.01	777.393	676.039	775.444	676.931	778.959	671.729	783.16	669.381	787.044	668.734	791.15	666.375	794.497	663.061	796.358	661.079	792.851	665	799.249	653.16	792.021	659.686	797.036	655.855	789.27	666.011	777.176	678.268	775.914	679.036	774.966	679.295	773.999	679.449	780.471	674.948	769.75	678.245	773.695	676.11	774.591	675.044
780.718	648.472	769.68	653.137	781.915	672.564	779.056	674.11	776.585	675.972	775.134	677.385	778.999	672.492	782.76	669.81	786.478	669.014	790.747	666.77	794.056	663.404	795.962	661.537	792.243	665.136	799.29	653.944	791.521	659.961	797.109	656.642	788.506	666.04	776.884	678.871	775.11	679.026	774.873	680.044	773.184	679.614	779.654	674.903	769.168	678.012	772.96	676.418	773.678	675.066
779.986	648.602	768.999	652.91	781.592	673.098	778.908	674.776	776.158	676.326	774.864	677.961	778.693	672.921	782.156	670.026	785.706	669.022	790.34	667.15	793.692	663.843	796.055	662.333	791.971	665.694	799.308	654.728	791.049	660.263	797.173	657.43	787.924	666.335	776.311	679.366	774.984	679.697	774.128	680.376	772.353	679.691	779.168	675.279	768.401	677.986	772.101	676.532	772.765	675.069
779.246	648.691	768.95	652.222	780.977	673.269	778.348	675.06	775.853	676.915	774.24	678.371	778.096	673.112	781.367	669.944	784.916	668.944	790.005	667.584	793.271	664.223	795.716	662.827	791.423	665.996	799.292	655.511	790.96	660.949	797.223	658.218	787.788	667.009	775.502	679.533	774.516	680.205	773.305	680.477	771.52	679.71	778.771	675.756	767.953	677.494	771.233	676.549	771.851	675.057
778.502	648.741	768.444	651.974	780.8	673.928	777.537	675.049	775.262	677.365	773.469	678.487	777.994	673.811	781.067	670.491	784.126	668.944	789.559	668.055	792.859	664.611	795.28	663.224	790.665	665.968	799.187	656.278	790.21	661.001	797.216	659.007	787.123	667.177	774.68	679.613	773.778	680.469	772.471	680.454	770.686	679.685	778.221	676.019	767.568	677.048	770.37	676.474	770.939	675.019
777.757	648.762	767.985	651.671	780.107	674.012	776.73	675.003	774.474	677.547	772.69	678.489	778.028	674.577	780.616	670.841	784.044	669.665	788.82	668.094	792.507	665.062	794.889	663.63	790.18	666.274	798.883	656.867	789.453	660.99	796.99	659.722	786.849	667.721	773.854	679.635	772.968	680.564	771.661	680.287	769.857	679.607	777.425	675.951	767.113	676.642	769.557	676.254	770.028	674.962
777.012	648.763	767.908	650.988	779.389	674.1	775.992	675.124	773.669	677.64	771.925	678.373	777.607	674.924	780.229	671.247	783.521	669.951	788.026	668.017	792.038	665.393	794.47	664.03	789.817	666.737	798.209	656.974	789.065	661.355	796.497	660.105	786.415	668.107	773.028	679.597	772.152	680.578	771.085	679.863	769.043	679.448	777.051	676.458	766.703	676.194	768.942	675.749	769.119	674.876
776.267	648.745	767.16	650.972	778.93	674.48	775.939	675.882	772.859	677.684	771.283	678.077	777.118	675.218	779.88	671.696	782.773	669.982	787.233	667.935	791.687	665.846	794.085	664.438	789.328	667.033	798.044	657.618	788.863	661.928	795.976	660.331	785.969	668.463	772.212	679.484	771.341	680.494	770.947	679.142	768.322	679.137	776.623	676.848	766.268	675.769	768.791	675.046	768.216	674.747
775.523	648.702	766.97	650.4	778.679	675.075	775.333	676.315	772.048	677.687	771.005	677.454	776.979	675.842	779.38	671.991	782.118	670.081	786.468	667.93	791.267	666.23	793.67	664.879	789.064	667.564	798.028	658.357	788.119	661.964	796.048	661.111	786	669.264	771.434	679.256	770.567	680.268	770.231	679.026	767.98	678.486	776.244	677.271	765.828	675.355	768.01	675.045	767.325	674.558
774.784	648.609	766.628	649.978	777.865	675.128	774.558	676.555	771.237	677.646	770.578	677.091	776.321	675.961	779.073	672.492	782.023	670.802	786.046	668.396	790.855	666.624	793.02	665.003	788.574	667.876	797.769	658.85	788.04	662.665	795.911	661.833	785.834	669.969	770.991	678.648	770.12	679.761	769.409	679.048	767.569	678.079	775.855	677.72	765.4	674.922	767.254	674.896	766.496	674.239
774.055	648.461	765.993	649.854	777.046	675.054	773.745	676.689	770.431	677.549	769.913	677.031	776.102	676.487	778.63	672.816	781.373	670.932	785.681	668.857	790.497	667.071	792.35	665.104	788.208	668.297	797.187	659.055	787.546	662.949	795.374	662.1	785.19	670.137	770.672	678.171	769.808	679.221	769.077	678.538	766.841	678.058	775.328	678.066	764.924	674.475	766.875	674.379	765.894	673.672
773.387	648.209	765.96	649.145	776.227	674.971	772.924	676.771	769.646	677.348	769.31	676.889	775.759	677.031	778.169	673.211	781.048	671.43	785.072	669	790.038	667.395	791.926	665.539	787.849	668.752	797	659.704	787.069	663.248	794.936	662.44	785.001	670.721	770.266	677.779	769.268	678.986	768.656	678.118	766.241	677.819	774.513	677.976	765.016	673.621	766.48	673.907	765.728	672.987
772.987	647.653	765.36	648.878	775.461	675.026	772.1	676.818	769.138	676.841	768.963	676.41	775.128	677.413	777.874	673.797	780.988	672.162	784.395	669.075	789.702	667.913	791.55	665.961	787.295	669.051	797.043	660.466	786.954	663.906	794.743	663.032	784.96	671.492	769.855	677.344	769.073	678.372	768.147	677.799	765.832	677.354	774.144	678.403	764.651	673.14	765.922	673.587	764.825	673.118
772.694	647.226	764.621	648.808	774.941	675.387	771.275	676.826	768.775	676.301	768.541	676.005	774.367	677.567	777.937	674.597	780.936	672.84	783.963	669.488	789.053	668.013	791.149	666.359	786.499	668.948	796.677	660.869	786.249	663.979	793.972	663.063	784.67	672.057	769.409	676.947	768.517	678.049	767.93	677.185	765.425	676.956	773.761	678.978	764.025	672.778	765.693	672.943	764.024	672.863
772.351	646.854	763.858	648.845	774.808	676.11	770.45	676.797	768.32	675.988	767.823	676.019	773.592	677.626	778.036	675.394	780.251	672.951	783.617	669.969	788.383	668.107	790.748	666.805	786.128	669.392	796.189	661.183	786.061	664.539	793.19	662.974	783.981	672.169	768.593	677.034	767.776	678.016	767.253	677.035	764.941	676.537	773.158	679.375	763.623	672.144	764.965	672.795	763.933	672.046
771.94	646.502	763.097	648.916	774.065	676.426	769.627	676.734	767.53	676.052	767.284	675.812	772.814	677.634	778.09	676.193	779.997	673.562	782.902	669.978	787.92	668.489	790.166	667.016	785.714	669.823	795.997	661.772	785.684	665.01	792.448	663.02	783.883	672.884	768.092	676.681	767.213	677.812	767.073	676.393	765.035	675.723	772.354	679.521	763.478	671.301	764.818	672.071	763.873	671.243
771.624	646.08	762.337	649	773.262	676.581	768.81	676.63	767.074	675.642	766.919	675.352	772.038	677.593	777.826	676.759	779.988	674.307	782.292	670.161	787.647	669.04	789.437	667.024	785.116	670.017	795.371	661.938	784.992	665.227	791.97	663.364	783.273	673.087	767.757	676.14	766.912	677.266	766.53	676.108	764.732	675.173	771.537	679.57	763.438	670.443	764.183	671.842	763.268	670.933
771.224	645.736	761.576	649.079	772.443	676.664	768.007	676.46	766.719	675.138	766.521	674.86	771.268	677.497	777.347	677.145	780.056	675.096	781.867	670.572	786.872	668.981	788.981	667.447	784.38	669.998	795.106	662.46	784.215	665.238	791.833	663.997	782.939	673.569	767.149	675.916	766.343	676.964	766.153	675.663	764.281	674.775	770.718	679.533	763.482	669.586	763.867	671.305	762.717	670.41
770.846	645.368	760.815	649.143	771.621	676.694	767.254	676.147	766.11	674.959	765.74	674.891	770.521	677.289	776.964	677.572	779.985	675.804	781.539	671.024	786.255	669.179	788.638	667.901	784.027	670.502	794.712	662.85	783.438	665.196	791.061	663.979	782.599	674.045	766.327	675.97	765.537	677.053	765.811	675.155	763.856	674.384	769.914	679.39	763.637	668.742	763.403	670.906	762.495	669.537
770.511	644.959	760.051	649.182	770.799	676.677	767.037	675.46	765.303	675.03	764.962	674.963	770.128	676.756	777.054	678.369	779.323	675.973	781.068	671.364	785.854	669.614	788.215	668.273	783.595	670.868	794.206	663.122	782.662	665.133	790.322	664.043	781.976	674.24	765.506	676.066	765.13	676.63	765.106	674.979	763.471	673.94	769.268	679.013	764.097	668.081	762.965	670.485	762.425	668.63
770.091	644.633	759.317	649.061	769.978	676.617	766.552	675.137	764.531	675.052	764.185	675.049	769.776	676.249	776.696	678.854	779.093	676.524	780.715	671.787	785.487	670.039	787.821	668.711	783.229	671.288	794.05	663.723	781.888	665.058	789.976	664.487	781.92	675.019	764.683	676.125	764.717	676.21	764.276	675.066	762.947	673.584	768.87	678.46	764.775	667.851	762.952	669.652	762.46	667.72
769.746	644.234	759.056	648.535	769.168	676.481	766.158	674.724	764.012	674.659	763.407	675.123	769.289	675.958	776.286	679.25	778.648	676.863	780.265	672.169	784.688	669.96	787.336	669.043	782.847	671.722	793.458	663.965	781.114	664.981	789.711	665	781.132	675.054	764.087	675.773	764.266	675.851	764.064	674.418	763.031	672.766	768.56	677.982	764.999	667.27	762.759	668.965	762.621	666.832
769.379	643.857	758.765	648.059	768.403	676.204	765.842	674.203	763.704	674.172	762.627	675.138	768.514	676.03	775.896	679.657	778.19	677.193	779.913	672.651	784.118	670.237	786.552	668.981	782.328	672.045	792.734	663.985	780.339	664.905	789.012	665.086	780.316	674.973	763.78	675.249	763.968	675.327	763.531	674.119	762.757	672.178	767.745	678.076	765.048	666.475	761.964	668.88	763.019	666.083
768.964	643.53	758.045	647.995	768.05	675.621	765.238	673.982	763.262	673.794	762.127	674.746	767.739	676.079	775.446	680.076	777.97	677.754	779.982	673.446	783.809	670.755	786.054	669.343	781.533	671.953	792.195	664.189	779.564	664.837	789.002	665.856	779.511	674.977	763.36	674.851	763.425	675.058	763.155	673.66	762.3	671.786	767.103	677.81	765.415	665.935	761.623	668.121	763.879	666.008
768.654	643.099	757.289	648.035	767.738	675.118	765.04	673.338	762.838	673.422	761.765	674.304	767.241	675.786	774.649	679.992	777.368	677.933	780.077	674.239	783.3	671.013	785.726	669.85	781.134	672.373	791.943	664.732	778.787	664.792	788.974	666.606	778.963	675.301	762.89	674.49	763.118	674.552	762.775	673.199	761.86	671.41	766.82	677.261	766.077	665.715	761.506	667.269	763.955	665.193
768.244	642.765	757.076	647.503	767.018	675.065	764.464	673.115	762.481	673.001	761.412	673.897	766.875	675.311	774.191	680.315	777.116	678.469	779.792	674.808	782.552	671.02	785.116	670.002	780.729	672.807	791.378	664.937	778.014	664.797	788.581	666.992	778.867	676.021	762.598	673.962	762.677	674.196	762.239	672.896	761.493	670.946	766.391	676.87	766.154	664.871	761.537	666.403	764.715	665.028
767.863	642.411	756.738	647.03	766.208	675.058	764.02	672.64	761.824	672.697	760.95	673.553	766.447	674.88	773.829	680.847	776.689	678.837	779.317	675.179	781.958	671.287	784.414	670.078	780.15	673.01	791.115	665.459	777.253	664.906	788.02	667.211	778.084	676.059	761.976	673.714	762.22	673.821	762.005	672.283	760.925	670.618	765.904	676.53	766.09	664.013	761.747	665.578	764.935	664.36
767.563	641.985	756.023	646.893	765.968	674.386	763.835	671.92	761.524	671.962	760.644	673.138	765.67	674.909	773.337	681.315	776.229	679.167	778.963	675.6	781.762	671.883	783.921	670.448	779.418	673	790.693	665.825	777.067	665.533	787.988	667.965	777.95	676.742	762.01	672.937	761.961	673.225	761.388	672.079	760.994	669.794	765.674	675.942	765.999	663.157	762.253	665.048	765.484	663.802
767.06	641.695	755.263	646.975	765.982	673.6	763.868	671.097	761.334	671.178	760.088	672.809	764.896	674.983	772.556	681.475	776.011	679.727	779.042	676.379	781.251	672.183	783.652	670.976	779.016	673.464	790.235	666.155	776.616	665.888	787.229	667.994	777.424	677.035	761.842	672.273	762.066	672.414	761.029	671.525	760.755	669.224	765.031	675.773	765.904	662.302	762.918	664.838	766.318	663.526
766.976	641.081	754.504	647.061	765.683	673.137	763.948	670.275	761.204	670.378	759.663	672.287	764.122	675.066	771.755	681.494	775.419	680.025	778.728	676.94	780.859	672.596	783.155	671.284	778.631	673.862	790	666.707	775.954	665.988	787.003	668.556	776.986	677.413	761.382	671.869	761.543	672.101	760.981	670.767	760.21	668.864	764.817	675.19	765.836	661.444	763.036	664.1	767.222	663.423
766.914	640.448	753.745	647.085	765.133	672.844	764.034	669.454	761.109	669.572	759.478	671.536	763.347	675.132	770.962	681.397	774.666	680.002	778.223	677.227	780.529	673.076	782.795	671.766	778.225	674.257	789.435	666.932	775.241	665.984	786.653	668.994	776.746	677.992	760.945	671.48	761.11	671.657	760.763	670.216	759.695	668.389	764.312	674.872	765.894	660.613	763.818	664.009	768.133	663.405
766.611	639.997	753.128	646.914	764.879	672.172	764.075	668.63	761.043	668.762	759.415	670.756	762.571	675.143	770.309	681.058	774.213	680.274	777.847	677.638	779.926	673.307	782.262	672.019	777.826	674.649	789.147	667.411	775.069	666.608	786.023	669.15	775.953	678.032	760.988	670.676	760.971	670.997	760.174	669.926	759.487	667.586	763.976	674.409	766.246	659.96	763.961	663.309	769.043	663.458
766.052	639.747	753.023	646.238	764.946	671.352	763.709	668.183	761.01	667.951	759.435	669.975	762.099	674.716	769.896	680.53	773.927	680.827	777.515	678.1	780.019	674.105	781.514	672.019	777.428	675.035	788.766	667.84	774.559	666.918	785.985	669.898	775.166	678.051	760.761	670.068	760.892	670.338	759.661	669.36	759.39	666.758	763.977	673.63	767.003	659.888	764.509	662.775	769.941	663.599
765.837	639.157	752.44	646.072	765.038	670.534	763.118	667.856	760.986	667.14	759.536	669.202	761.744	674.28	769.69	679.973	773.402	681.342	776.964	678.334	779.85	674.777	780.954	672.348	776.921	675.429	788.155	668.055	773.875	666.985	785.307	670.003	774.978	678.674	760.083	669.855	760.397	670.027	759.464	668.548	759.371	665.924	763.789	672.973	767.087	659.12	765.304	662.505	770.727	663.922
765.811	638.418	751.733	646.047	765.082	669.716	762.642	667.278	760.984	666.328	759.786	668.493	761.383	673.88	769.055	679.798	772.636	681.547	776.745	678.906	779.395	675.143	780.709	672.883	776.911	676.199	787.376	667.974	773.239	667.065	785.016	670.496	774.526	679.177	759.675	669.278	759.804	669.595	759.362	667.718	759.408	665.091	763.092	672.844	767.763	658.941	766.167	662.405	771.034	664.646
765.854	637.674	751.135	645.883	764.796	669.18	762.432	666.483	761	665.516	760.241	667.934	760.939	673.523	768.838	679.224	771.853	681.668	776.241	679.198	778.914	675.442	780.183	673.207	776.989	676.995	787.128	668.48	773.023	667.664	784.698	670.962	773.767	679.383	759.505	668.476	759.533	668.863	759.317	666.881	759.519	664.267	762.998	672.164	767.999	658.337	767.037	662.383	771.528	665.224
765.924	636.932	750.925	645.238	764.21	668.896	762.315	665.667	761.029	664.705	760.919	667.853	760.62	673.131	768.36	678.889	771.062	681.738	775.857	679.613	778.715	676.029	779.966	673.77	777.071	677.792	786.732	669.008	772.492	667.896	784.058	671.106	772.952	679.354	759.446	667.653	759.395	668.062	759.318	666.044	759.784	663.503	762.934	671.418	768.023	657.515	767.905	662.425	772.411	665.235
765.999	636.19	751.016	644.483	763.889	668.285	762.234	664.846	761.079	663.894	760.99	667.2	760.06	672.795	767.97	678.491	770.268	681.771	775.53	680.087	778.061	676.192	779.945	674.505	777.034	678.53	786.135	669.387	772.158	668.341	784.001	671.833	772.165	679.139	759.464	666.828	759.329	667.248	759.365	665.207	760.28	662.951	762.572	670.94	768.355	656.991	768.768	662.532	772.944	664.683
766.076	635.449	750.634	644.124	763.972	667.466	762.185	664.022	761.159	663.086	761.044	666.468	759.643	672.257	768.008	677.711	769.474	681.772	774.962	680.324	778.004	676.884	779.634	675.056	776.605	679.004	785.367	669.536	771.806	668.766	783.358	671.977	772.048	678.389	759.581	666.011	759.31	666.432	759.47	664.377	761.017	662.878	761.953	670.734	769.009	656.789	769.6	662.772	773.345	664.214
766.15	634.707	750.184	643.802	764.037	666.646	762.166	663.197	761.265	662.282	761.337	665.938	759.447	671.51	767.834	677.037	768.68	681.732	774.742	680.893	777.923	677.601	779.022	675.264	776.1	679.317	784.585	669.596	771.287	669.018	783.039	672.443	771.52	678.077	759.897	665.28	759.333	665.616	759.686	663.57	761.013	662.057	761.984	669.919	769.066	655.983	769.945	663.431	773.954	663.798
766.204	633.964	749.991	643.238	763.704	666.187	762.174	662.372	761.41	661.484	762.029	665.864	759.364	670.736	767.215	676.855	767.89	681.644	774.207	681.186	777.573	678.077	779.007	675.988	776.016	679.962	783.801	669.602	770.974	669.566	782.766	672.963	770.765	678.034	760.529	665.002	759.413	664.804	760.244	663.078	760.938	661.229	761.898	669.193	769.896	655.957	770.375	663.968	774.388	663.113
766.219	633.219	749.401	643.067	763.125	665.861	762.203	661.547	761.636	660.717	762.142	665.112	759.352	669.958	766.89	676.373	767.111	681.493	773.972	681.713	776.963	678.262	778.878	676.675	775.906	680.631	783.018	669.559	771.021	670.294	782.004	673.008	770.155	677.854	761.006	664.654	759.572	664.006	760.805	662.743	761.002	660.437	761.316	668.943	770.069	655.231	770.798	663.817	774.541	662.219
766.108	632.521	749.124	642.588	762.65	665.291	762.262	660.723	762.05	660.049	762.135	664.338	759.388	669.182	766.544	675.911	766.41	681.207	773.969	682.455	776.827	678.939	778.472	677.114	775.51	681.094	782.243	669.455	771.133	671.064	781.234	672.986	769.955	677.202	761.002	663.835	759.922	663.333	761.024	662.17	761.41	659.965	760.771	668.542	770.019	654.384	771.207	663.305	774.571	661.309
765.76	631.93	748.772	642.186	762.452	664.495	762.368	659.905	762.774	659.979	762.069	663.559	759.482	668.411	765.951	675.702	765.926	680.647	773.708	683.055	776.219	679.145	777.964	677.397	775.008	681.369	781.488	669.267	771.197	671.835	781.049	673.579	769.295	677.044	760.909	663.013	760.467	662.887	760.945	661.335	762.005	659.739	760.515	667.774	770	653.538	771.67	662.905	774.496	660.403
765.196	631.802	748.249	641.958	762.348	663.68	762.536	659.099	763.015	659.39	761.985	662.781	759.66	667.667	765.827	675.011	765.706	680.142	773.092	683.228	775.88	679.613	778.036	678.203	774.711	681.876	781.044	668.721	771.149	672.607	780.627	673.946	769.086	676.441	760.967	662.197	761.06	662.68	760.934	660.54	762.045	658.929	760.386	666.965	770.341	653.007	772.061	662.364	774.258	659.555
764.898	631.351	748.063	641.384	762.289	662.859	762.849	658.391	763.001	658.589	761.904	662.003	760.091	667.082	765.099	675	765.258	679.803	772.818	683.723	775.544	680.081	777.831	678.855	774.259	682.219	780.757	668.142	770.676	673.175	780.061	674.172	768.598	676.076	761.616	662.013	760.995	661.866	761.341	659.988	761.944	658.101	760.328	666.146	771.022	652.797	771.966	661.5	773.713	658.947
764.633	630.93	747.564	641.141	762.266	662.037	763.415	657.927	762.959	657.788	761.853	661.223	760.712	666.891	764.361	674.922	764.857	679.406	772.388	684.096	774.963	680.296	777.31	679.146	773.852	682.607	780.394	668.012	770.01	673.469	780.017	674.921	767.868	675.991	761.979	661.552	760.914	661.053	761.923	659.717	762.018	657.314	760.319	665.326	771.288	652.043	772.43	661.065	772.972	658.794
764.028	631.109	747.155	640.76	762.281	661.214	763.981	657.671	763.044	657.032	761.955	660.483	760.998	666.435	763.909	674.547	764.548	678.928	771.886	684.447	775.019	681.089	776.901	679.541	773.523	683.077	779.94	668.434	769.256	673.519	779.282	674.974	767.204	675.894	761.991	660.752	761.063	660.336	761.992	659.026	762.539	656.992	760.356	664.506	771.117	651.225	773.003	660.668	773.06	657.888
763.927	631.761	746.966	640.147	762.337	660.393	764.018	656.929	763.825	657.01	762.316	659.981	760.993	665.685	763.705	673.982	764.006	678.677	771.782	685.229	774.885	681.793	776.611	680.068	773.001	683.358	779.706	669.002	768.526	673.347	779.042	675.518	767.022	675.248	762.094	660.057	761.503	659.884	762.128	658.335	762.979	656.614	760.443	663.691	770.383	651.076	772.844	660.209	773.155	656.981
763.456	632.034	747.057	639.389	762.443	659.577	763.955	656.107	764.247	656.426	762.993	659.899	761.13	665.012	762.916	674.07	763.741	678.149	771.819	686.027	774.388	682.101	775.965	680.24	772.71	683.872	778.969	668.976	768.037	672.814	778.674	675.934	766.394	674.974	762.883	660.021	762.041	659.633	762.561	657.881	762.995	655.806	760.603	662.891	770.024	650.502	772.324	659.806	772.94	656.166
762.716	632.012	746.56	639.13	762.637	658.781	764.068	655.4	764.441	655.656	763.059	659.141	761.823	664.911	762.195	673.921	763.284	677.807	771.884	686.822	773.941	682.44	775.807	680.903	772.253	684.219	778.328	669.124	767.801	672.258	778.097	676.138	765.614	675.002	762.995	659.291	761.96	658.824	763.058	657.539	763.057	655.04	760.893	662.133	769.992	649.692	771.872	659.397	772.213	655.937
761.975	631.925	746.141	638.73	763.082	658.211	764.494	654.922	764.486	654.849	763.01	658.368	762.081	664.365	761.947	673.341	762.866	677.434	771.962	687.617	773.736	683.032	775.244	681.159	771.85	684.616	777.898	669.516	767.401	671.883	778.015	676.835	764.797	675.06	762.98	658.483	762.152	658.132	762.958	656.707	763.837	654.997	761.652	662.05	770.06	648.836	771.489	658.905	771.373	655.907
761.276	632.02	745.938	638.132	763.647	657.834	765.18	654.712	764.421	654.045	762.999	657.609	762.071	663.592	761.918	672.576	762.554	676.954	772.046	688.412	773.029	683.129	774.875	681.599	771.516	685.082	777.639	670.046	766.913	671.581	777.354	676.956	764.199	674.839	763.368	658.067	762.693	657.858	763.239	656.092	763.986	654.316	762.005	661.507	769.887	648.166	770.972	658.57	770.956	655.444
760.967	632.481	746.028	637.373	764.07	657.429	765.29	653.903	764.159	653.291	763.204	657.014	761.99	662.818	761.753	671.956	761.959	676.699	772.129	689.206	772.89	683.784	774.558	682.082	770.97	685.343	776.86	669.966	766.725	671.016	777.078	677.456	763.91	674.275	763.923	657.786	763.095	657.466	763.815	655.8	764.519	654.016	762.076	660.741	769.186	647.982	770.66	657.96	770.517	654.943
760.778	633.035	746.089	636.612	764.034	656.608	764.987	653.22	763.5	653.059	763.935	656.974	761.909	662.044	761.013	671.908	761.977	675.951	772.193	690.002	772.36	684.07	773.959	682.281	770.721	685.85	776.229	670.153	766.107	670.81	776.742	677.927	763.347	674.05	764.015	657.033	763.384	656.95	764.017	655.217	764.992	653.652	762.014	659.923	768.882	647.287	769.834	658.025	769.617	654.932
760.038	633.044	745.74	636.171	763.949	655.789	764.403	652.889	763.142	652.601	764.299	656.333	762.026	661.315	760.642	671.243	761.834	675.333	772.213	690.8	771.895	684.462	773.817	682.934	770.207	686.179	775.861	670.59	765.905	670.221	776.022	678.043	763.086	673.485	763.957	656.212	764.04	656.783	764.066	654.463	765.007	652.836	761.932	659.106	768.908	646.44	769.172	657.785	768.71	655.038
759.298	632.962	745.288	635.824	763.891	654.968	764.006	652.512	762.775	652.165	764.489	655.59	762.476	660.955	760.442	670.479	761.401	674.936	772.062	691.538	771.809	685.247	773.187	683.136	769.886	686.704	775.565	671.073	765.941	669.45	775.242	677.986	762.609	673.163	764.628	656.058	763.994	655.973	764.416	653.923	765.011	652.044	761.854	658.289	768.993	645.583	768.797	657.282	767.807	655.099
758.566	632.962	744.998	635.378	764.1	654.296	764.068	651.705	762.205	651.91	764.563	654.814	763.023	660.725	760.344	669.684	760.769	674.653	771.663	692.059	771.851	686.05	772.978	683.711	769.893	687.501	774.961	671.269	766.033	668.677	775.067	678.576	762.159	672.756	764.962	655.53	764.099	655.256	765.072	653.725	765.816	652.015	761.809	657.47	769.081	644.727	768.372	656.851	766.979	654.916
757.988	633.174	744.522	635.08	764.6	653.869	763.875	650.952	762.034	651.267	764.564	654.033	763.121	659.974	760.3	668.883	760.512	673.905	770.992	692.144	771.93	686.851	772.947	684.466	769.977	688.299	774.776	671.847	766.107	667.903	774.65	679.087	761.949	672.108	765.006	654.76	764.592	654.923	764.98	652.892	765.999	651.349	761.854	656.656	769.115	643.872	767.885	656.474	766.976	654.018
757.972	633.896	744.192	634.66	765.12	653.615	763.082	650.961	761.419	651.071	764.483	653.256	763.052	659.2	760.3	668.081	760.362	673.125	770.899	692.851	772.018	687.651	772.689	685.038	770.071	689.096	774.265	672.143	765.908	667.243	773.972	679.366	761.992	671.343	765.155	654.142	765.028	654.554	765.159	652.2	765.997	650.538	762.213	656.126	768.897	643.207	767.574	655.929	766.117	653.97
757.347	633.96	743.827	634.237	764.779	653.018	762.315	650.916	761.118	650.571	764.254	652.523	762.976	658.425	760.351	667.281	760.269	672.336	770.342	693.076	772.102	688.452	771.949	685.138	770.13	689.895	773.91	672.599	765.445	666.891	773.187	679.39	761.448	671.107	765.849	654.01	765.014	653.757	765.69	651.86	766.323	650.06	762.8	655.859	768.251	642.951	766.966	655.674	765.975	653.203
756.624	633.966	743.316	633.924	764.142	652.82	761.932	650.469	760.725	650.162	763.758	652.107	762.963	657.662	760.458	666.487	760.217	671.543	769.971	693.501	772.167	689.253	771.881	685.921	769.986	690.603	773.913	673.375	764.94	666.647	772.417	679.235	760.878	670.645	766.151	653.313	765.11	653.035	766.04	651.399	766.955	649.832	762.971	655.243	767.92	642.323	766.728	655.048	765.307	652.977
756.019	634.132	742.558	634.017	764.017	652.177	761.625	649.963	760.221	649.87	763.2	651.841	763.12	657.001	760.667	665.724	760.194	670.749	769.743	694.144	772.195	690.057	771.925	686.73	769.583	691.101	774.007	674.153	764.818	666.025	772.1	678.655	760.548	669.952	766.194	652.505	765.836	652.931	766.032	650.606	767.163	649.084	763.607	655.081	768	641.476	766.126	654.769	764.743	652.443
755.953	634.84	742.182	633.657	763.945	651.435	760.812	649.999	760.06	649.256	763.047	651.24	763.878	656.984	761.061	665.129	760.199	669.954	769.01	694.439	771.998	690.795	772.009	687.539	768.986	691.258	774.083	674.934	764.128	665.903	771.719	678.191	760.397	669.147	766.156	651.68	766.134	652.341	766.267	649.967	767.122	648.251	763.931	654.546	768.063	640.619	765.792	654.267	764.477	651.597
755.989	635.572	741.833	633.159	763.599	650.924	760.037	649.915	759.42	648.931	762.422	651.068	764.253	656.4	761.781	665.027	760.231	669.159	768.22	694.542	771.385	691.009	772.092	688.348	768.802	691.89	773.957	675.625	763.703	665.379	771.129	678.006	760.327	668.327	766.089	650.856	766.171	651.53	767.001	649.828	767.043	647.42	763.991	653.81	767.666	640.165	765.24	653.9	764.373	650.692
755.665	635.958	741.359	632.706	762.978	650.741	759.918	649.212	758.647	648.926	762.126	650.588	764.43	655.661	761.954	664.381	760.301	668.368	767.424	694.569	770.994	691.415	772.138	689.155	768.301	692.167	773.566	676.079	763.466	664.647	770.356	678.072	760.304	667.504	766.008	650.033	766.124	650.715	767.144	649.086	766.963	646.589	764.157	653.206	767.128	639.763	764.688	653.416	764.351	649.78
755.067	636.101	740.612	632.563	762.835	650.031	759.349	648.958	757.84	649.017	761.777	650.142	764.474	654.887	761.97	663.622	760.419	667.583	766.63	694.521	770.782	692.012	771.938	689.882	767.931	692.622	772.964	676.25	763.324	663.883	770.067	677.515	760.333	666.682	765.923	649.21	766.048	649.901	767.118	648.252	766.929	645.759	764.732	652.947	766.846	639.085	764.454	652.583	764.405	648.87
755.006	636.787	739.85	632.554	762.105	649.991	758.537	648.996	757.034	649.088	761.136	649.969	764.428	654.112	762.267	663.147	760.599	666.814	765.85	694.381	770.003	692.037	771.291	690.058	767.616	693.226	773.031	677.029	763.233	663.11	769.626	677.161	760.41	665.864	765.851	648.386	765.961	649.089	767.042	647.417	767.138	645.128	764.951	652.355	766.863	638.227	764.333	651.722	764.564	647.977
755.018	637.516	739.094	632.635	761.364	649.915	757.729	649.04	756.28	649.036	760.36	650.041	764.188	653.387	762.834	662.896	760.967	666.139	765.105	694.11	769.97	692.79	771.027	690.553	766.87	693.497	772.914	677.725	763.183	662.334	769.244	676.765	760.563	665.059	765.808	647.561	765.882	648.275	766.961	646.582	767.863	645.009	765.512	652.112	766.937	637.37	764.277	650.854	764.935	647.203
754.706	637.934	738.431	632.868	760.928	649.504	756.991	648.884	756.023	648.414	760.101	649.521	763.624	653.089	763.105	662.253	761.659	666.009	765.035	693.352	769.44	693.25	771.041	691.346	766.076	693.61	772.482	678.09	763.154	661.557	768.917	676.296	760.887	664.373	765.835	646.737	765.831	647.46	766.925	645.758	768.3	644.349	765.905	651.632	767.027	636.514	764.291	649.984	765.718	647
754.106	638.082	737.989	633.358	760.664	648.933	756.938	648.13	755.526	648.12	759.685	649.131	763.143	652.763	763.03	661.456	762.001	665.553	764.512	693.074	768.699	693.485	770.855	692.027	765.277	693.66	771.966	678.35	763.143	660.779	768.405	675.952	761.436	663.914	766.152	646.164	765.885	646.667	767.133	645.037	768.477	643.549	766.018	650.93	767.114	635.657	764.358	649.116	765.976	646.341
754.035	638.737	737.768	633.981	759.844	648.956	756.257	648.011	755.175	647.674	759.041	648.991	763.016	652.109	762.972	660.658	761.993	664.766	763.777	693.035	767.901	693.57	770.058	692.08	764.475	693.653	771.897	679.101	763.144	660.001	767.631	676.026	762.025	663.682	766.768	645.893	766.169	646.02	767.859	644.91	768.539	642.719	766.095	650.267	767.181	634.8	764.495	648.259	765.933	645.456
753.502	638.979	737.202	634.304	759.028	649.059	755.468	647.974	754.805	647.236	758.283	649.041	763.072	651.335	763.257	660.185	761.913	663.977	763.144	692.895	767.098	693.577	769.263	692.032	763.677	693.585	771.172	679.321	763.178	659.223	767.191	675.694	762.003	662.895	767.043	645.299	766.914	645.974	768.276	644.33	768.521	641.886	766.683	650.034	767.177	633.944	764.787	647.467	766.492	645.084
752.809	639.028	736.453	634.425	758.258	648.947	754.992	647.623	754.307	646.926	758.067	648.451	762.523	651.08	763.849	659.934	761.967	663.197	763.015	692.2	766.299	693.49	768.989	692.543	762.89	693.444	770.469	679.184	763.23	658.447	766.817	675.235	761.93	662.076	766.968	644.482	767.005	645.237	768.44	643.521	768.416	641.063	767.086	649.466	766.925	633.259	765.362	647.019	766.871	644.557
752.141	639.049	735.69	634.453	757.909	648.439	754.781	647.024	754.055	646.388	757.601	648.145	762.147	650.67	764.354	659.373	762.595	663.026	762.367	692.062	765.541	693.258	768.671	693.147	762.205	693.073	770.037	678.704	763.302	657.673	766.285	674.928	762.068	661.38	767.425	644.141	767.025	644.45	768.462	642.686	768.169	640.302	767.145	648.693	766.364	632.876	765.983	646.787	767.37	644.154
752.045	639.687	734.932	634.371	757.575	647.98	753.989	647.002	753.525	646.041	757.216	647.77	761.872	650.166	764.534	658.592	762.988	662.608	762.083	691.544	765.124	692.748	767.951	693.47	762.039	692.398	769.979	677.959	763.397	656.901	765.5	675.013	762.501	660.91	767.985	643.748	767.396	644.02	768.362	641.862	767.483	640.026	767.088	647.875	766.013	632.426	765.973	645.927	767.828	643.692
751.584	640.126	734.298	634.049	756.773	647.997	753.202	646.964	752.794	646.018	756.942	647.266	761.247	649.96	764.635	657.798	763.023	661.841	761.701	691.146	764.831	692.2	767.154	693.625	761.598	692.044	770.135	677.19	763.538	656.136	764.715	675.074	763.095	660.648	768.368	643.109	768.058	643.808	768.035	641.11	767.057	639.564	767.004	647.059	765.512	632.05	765.988	645.079	768.261	643.23
750.941	640.368	733.922	633.543	756.008	647.895	752.991	646.362	752.229	645.806	756.383	646.977	760.476	650.028	764.682	656.998	762.991	661.07	761.112	690.913	764.213	692.008	766.344	693.698	761.036	691.798	770.091	676.44	763.818	655.425	764.2	674.77	763.074	659.827	768.486	642.294	768.408	643.09	767.284	641.02	766.995	638.842	766.929	646.242	765.133	631.586	766.799	645.027	768.86	642.865
750.203	640.406	733.742	632.996	755.909	647.19	752.512	646.022	751.875	645.315	755.626	647.043	760.127	649.617	764.687	656.196	763.746	661.045	760.629	690.343	763.416	692.065	765.532	693.724	760.966	691.055	769.645	675.965	764.344	655.077	763.819	674.324	762.989	659.009	768.469	641.468	768.523	642.283	767.006	640.422	767.068	638.012	766.912	645.424	764.68	631.14	767.011	644.342	769.337	642.214
749.486	640.24	732.987	633.084	755.314	646.935	751.722	645.991	751.383	645.002	755.177	646.722	759.782	649.164	764.654	655.394	764.219	660.523	760.46	689.567	763.102	691.558	764.719	693.701	760.223	691.011	768.927	675.767	764.959	654.862	763.409	673.973	762.909	658.19	768.304	640.664	768.554	641.469	767.006	639.615	766.947	637.319	767.442	645.11	763.992	630.996	766.996	643.484	769.398	641.312
749.127	639.74	732.297	632.953	754.506	646.948	751.046	645.855	751.094	644.493	754.828	646.267	759.168	648.98	764.56	654.598	764.497	659.799	760.368	688.775	762.678	691.176	763.91	693.626	759.769	690.47	768.144	675.782	765.331	654.222	763.058	673.522	763.007	657.44	767.816	640.168	768.511	640.655	767.048	638.785	766.403	636.963	768.015	644.709	763.305	630.87	767.398	643.05	769.232	640.441
748.803	639.274	731.953	632.488	753.688	647.038	750.991	645.1	750.626	644.103	754.348	645.976	758.396	649.047	764.373	653.823	764.652	659.022	760.337	687.978	762.218	690.836	763.11	693.491	759.53	689.737	767.365	675.87	765.419	653.452	762.637	673.175	763.398	656.899	767.271	639.795	768.367	639.86	766.884	638.099	765.964	636.503	768.364	644.079	762.888	630.386	768.063	642.756	768.576	639.981
748.365	639.007	731.927	631.753	752.873	647.103	750.245	645.015	749.948	643.994	754.087	645.471	758.109	648.555	763.966	653.243	764.748	658.233	760.361	687.18	761.944	690.286	762.345	693.225	759.439	688.943	766.587	675.97	765.425	652.677	762.208	672.781	764.054	656.758	766.956	639.288	768.046	639.18	766.144	638.029	765.996	635.715	768.454	643.267	762.446	629.987	768.355	641.971	768.023	639.611
748.09	638.527	731.896	631.037	752.11	646.964	749.453	644.996	749.303	643.885	753.624	645.097	757.706	648.18	763.42	652.86	764.801	657.44	760.446	686.386	761.378	690.093	762.051	692.581	759.428	688.143	765.808	676.066	765.333	651.912	761.943	672.23	763.978	655.943	767.035	638.465	767.318	639.037	765.866	637.302	766.069	634.885	768.442	642.449	762.052	629.518	768.374	641.107	768.034	638.772
747.683	638.19	731.256	630.923	751.982	646.269	749.046	644.594	748.974	643.377	752.974	644.987	757.248	647.875	762.979	652.529	764.816	656.645	760.665	685.622	760.865	689.605	761.639	692.172	759.507	687.346	765.029	676.125	765.088	651.231	762.01	671.466	764.129	655.233	767.146	637.646	767.027	638.453	765.827	636.485	765.848	634.258	768.3	641.644	761.597	629.112	768.157	640.274	767.72	638.177
747.289	637.841	730.785	630.507	751.439	646.03	748.766	644.057	748.49	643.002	752.317	644.933	757.048	647.313	763.074	651.732	764.803	655.85	761.171	685.136	760.569	688.917	761.208	691.818	759.718	686.581	764.253	676.096	764.426	651.032	761.58	671.129	764.616	654.875	767.231	636.823	767.015	637.7	765.878	635.648	765.37	633.844	767.809	641.143	761.187	628.675	767.438	640.085	767.14	637.771
746.994	637.391	730.551	629.805	750.633	646.036	748.054	643.945	747.728	643.027	752.024	644.417	756.483	647.033	762.769	651.181	764.765	655.057	761.677	684.775	760.451	688.126	760.921	691.282	760.212	686.141	764.057	675.458	764.106	650.559	761.011	670.763	765.032	654.5	767.241	635.999	767.077	636.887	765.956	634.813	764.967	633.443	767.247	640.796	760.761	628.226	766.985	639.546	766.832	637.091
746.541	637.099	730.49	629.044	750.004	645.817	748.027	643.143	747.218	642.743	751.554	644.054	755.771	647.021	762.334	650.796	764.698	654.265	762.068	684.42	760.424	687.323	760.367	691.091	760.761	685.831	763.591	675.137	764.031	649.897	760.614	670.189	765.014	653.704	766.999	635.288	766.935	636.219	766.042	633.978	764.527	633.042	766.923	640.287	760.148	628.012	766.848	638.756	766.824	636.182
746.2	636.695	730.549	628.285	749.95	645.017	747.318	643.024	746.833	642.281	750.871	644.007	755.221	646.833	761.915	650.422	764.575	653.48	762.467	684.003	760.478	686.522	759.823	690.589	761.002	685.273	763.163	674.782	763.926	649.261	760.445	669.42	765.181	653.008	766.428	634.868	766.287	636.005	766.126	633.144	764.124	632.613	766.953	639.469	759.374	627.989	766.872	637.886	766.889	635.272
745.85	636.298	730.741	627.557	750.013	644.202	747.029	642.488	746.318	641.965	750.284	643.857	754.932	646.307	761.559	649.922	764.353	652.724	762.891	683.628	760.644	685.738	759.548	689.875	760.937	684.477	762.917	674.226	763.358	648.997	760.362	668.635	765.855	652.863	765.631	634.894	766.025	635.417	766.194	632.308	763.703	632.202	767.035	638.652	758.893	627.469	766.932	637.018	766.975	634.363
745.398	636	731.163	627.072	749.386	644.017	746.651	642.045	745.513	642.063	749.948	643.376	754.411	646.058	760.763	650.022	763.916	652.192	763.279	683.234	761.091	685.196	759.447	689.071	761.402	684.128	762.324	674.083	763.114	648.496	760.349	667.845	766.14	652.255	765.113	634.701	766.035	634.651	766.227	631.471	763.283	631.79	767.115	637.835	759.013	626.617	767.008	636.151	767.067	633.454
745.123	635.548	731.857	626.977	749.024	643.554	746.069	641.809	745.11	641.616	749.497	643.004	754.125	645.564	760.206	649.766	763.331	651.881	763.703	682.838	761.634	684.824	759.428	688.259	761.813	683.716	761.827	673.586	762.67	648.123	760.387	667.056	766.176	651.443	764.844	634.063	765.717	634.164	766.149	630.646	762.874	631.369	767.152	637.016	758.654	626.119	767.088	635.284	767.154	632.545
744.722	635.173	731.948	626.325	748.72	643.041	745.971	641.098	744.705	641.186	748.768	643.028	753.715	645.194	759.832	649.291	763.011	651.426	764.062	682.365	762.015	684.43	759.48	687.448	761.98	683.102	761.507	672.914	762.039	647.975	760.495	666.276	766.118	650.622	764.307	633.548	765.234	633.808	765.757	630.12	762.461	630.953	766.945	636.328	758.128	625.728	767.161	634.417	767.216	631.634
744.167	634.975	732.457	626.078	748.069	642.879	745.225	641.003	744.104	641.029	748.234	642.79	753.274	644.867	759.388	648.92	763.072	650.658	763.981	681.572	761.93	683.63	759.671	686.662	761.95	682.347	761.327	672.152	761.333	647.983	760.723	665.543	766.036	649.803	763.56	633.213	764.954	633.286	765.198	629.83	762.033	630.552	766.483	635.872	757.948	625.07	767.222	633.549	767.206	630.721
743.428	635.061	732.881	625.743	747.995	642.126	744.426	641.007	743.377	641.003	747.859	642.35	753.051	644.344	758.59	648.996	762.738	650.18	764.342	681.135	762.29	683.124	760.164	686.156	762.501	681.966	761.205	671.377	761.071	647.455	761.207	664.97	765.951	648.985	762.771	632.973	764.38	633.049	765.022	629.221	761.636	630.113	765.963	635.602	758.034	624.215	767.256	632.679	766.775	630.027
743.105	634.596	733.055	625.164	748.004	641.322	744.064	640.562	742.892	640.521	747.441	642.004	752.512	644.033	757.792	649.087	762.29	649.804	764.893	680.792	762.749	682.756	760.709	685.797	763.257	682.008	761.141	670.595	760.61	647.068	761.81	664.811	765.876	648.165	761.966	632.784	764.112	632.514	764.344	628.952	761.22	629.71	766.048	634.787	757.987	623.44	767.201	631.817	766.136	629.757
742.722	634.229	733.693	625.049	747.475	641.042	743.714	640.097	743.004	639.717	747.098	641.563	751.806	644.014	757.175	648.82	761.944	649.377	765.297	680.266	763.165	682.396	761.037	685.335	763.78	681.759	761.096	669.812	759.957	646.954	762.127	664.354	765.835	647.344	761.151	632.645	763.653	632.146	763.532	629	760.808	629.268	765.807	634.156	757.556	622.909	766.851	631.199	766.055	629.047
742.34	633.88	733.904	624.51	747.073	640.63	743.116	639.88	742.724	639.198	746.686	641.196	751.253	643.836	756.818	648.349	761.485	649.03	765.4	679.484	763.553	681.993	760.955	684.526	764.158	681.318	761.069	669.028	759.184	647.029	762.48	663.916	765.916	646.554	760.331	632.539	763.252	631.757	763.158	628.606	760.271	628.962	765.312	633.826	757.018	622.633	766.277	630.834	765.899	628.244
742.044	633.448	734.285	624.135	746.796	640.095	743.042	639.134	742.271	638.806	746.289	640.813	750.951	643.334	756.493	647.9	761.151	648.599	765.332	678.693	764.214	681.68	760.882	683.716	764.594	680.967	761.062	668.244	758.41	647.087	763.037	663.693	766.257	645.962	759.509	632.453	762.977	631.225	762.798	628.018	759.488	628.993	764.887	633.442	756.689	622.096	765.992	630.263	765.263	627.944
741.612	633.083	734.822	623.913	746.102	639.974	742.289	639.067	741.96	638.309	745.926	640.396	750.462	642.998	755.952	647.644	760.743	648.162	764.885	678.115	764.46	680.934	761.222	683.142	764.965	680.517	761.085	667.46	758.092	646.573	762.98	662.911	767.034	645.927	758.684	632.393	762.454	630.672	762.159	627.563	759.034	628.583	764.582	632.924	756.204	621.733	766.094	629.399	764.438	627.897
740.986	633.003	734.928	623.269	746.046	639.203	742.024	638.462	742.021	637.532	745.507	640.057	749.728	643.039	755.736	647.067	760.156	647.925	764.301	677.839	764.592	680.144	761.703	682.785	765.382	680.17	761.127	666.677	757.685	646.166	763.119	662.233	767.011	645.109	757.858	632.367	761.677	630.432	761.353	627.34	758.666	628.061	763.985	632.709	755.802	621.248	765.507	629.041	763.906	627.496
740.356	632.941	735.519	623.042	745.369	639.048	742.014	637.667	741.641	637.05	745.089	639.642	749.218	642.783	755.21	646.792	759.366	648.002	763.994	677.397	764.652	679.343	762.129	682.426	765.898	679.793	761.191	665.895	757.102	645.994	763.582	661.9	767.036	644.317	757.031	632.36	760.878	630.272	760.526	627.2	757.965	627.967	763.774	632.062	755.233	620.98	765.148	628.569	763.548	626.949
740.002	632.496	736.232	623.012	745.056	638.533	741.795	637.109	741.13	636.717	744.999	638.997	748.861	642.328	754.845	646.353	758.576	648.079	764.02	676.632	764.654	678.539	762.456	681.945	766.312	679.249	761.289	665.117	756.387	646.003	764.06	661.612	767.515	643.976	756.205	632.386	760.07	630.162	759.695	627.095	757.135	628.043	763.081	632.003	754.463	620.947	764.683	628.096	762.665	626.995
739.623	632.166	736.821	622.893	744.694	638.072	741.127	636.937	740.995	636.099	744.916	638.352	748.421	642.008	754.495	645.898	758.135	647.677	763.787	675.982	764.6	677.736	763.025	681.668	766.418	678.463	761.435	664.347	756.039	645.52	764.212	660.998	768.15	643.704	755.381	632.452	759.256	630.087	758.86	627.015	756.408	627.961	762.365	631.902	753.93	620.562	763.971	627.934	761.948	626.743
739.222	631.793	736.968	622.255	744.098	637.85	740.993	636.205	740.921	635.4	744.482	637.952	748.095	641.549	753.95	645.637	757.748	647.227	763.16	675.816	764.448	676.946	762.981	680.895	766.316	677.672	761.662	663.598	755.628	645.156	764.922	660.895	768.438	642.96	754.56	632.55	758.44	630.044	758.023	626.961	755.918	627.533	761.892	631.518	753.653	619.976	763.106	628.027	761.809	625.958
738.937	631.3	737.561	622.09	744.004	637.13	741.048	635.39	740.543	634.91	744.083	637.592	747.675	641.19	753.731	645.051	757.219	646.981	762.855	675.332	764.071	676.283	763.171	680.259	765.852	677.143	762.174	663.123	755.263	644.759	765.188	660.259	768.48	642.142	753.747	632.69	757.623	630.031	757.185	626.928	755.615	627.029	761.652	630.945	753.137	619.695	762.353	627.962	760.924	626.029
739.022	630.56	737.869	621.632	743.288	637.038	740.536	635.078	740.021	634.651	743.704	637.191	747.282	640.808	753.193	644.787	756.467	647.024	762.472	674.912	763.505	675.925	763.601	679.85	765.307	676.812	762.692	662.782	754.906	644.332	765.264	659.48	768.206	641.388	752.948	632.899	756.806	630.036	756.347	626.907	755.123	626.683	761.011	630.759	752.813	619.062	761.95	627.428	760.122	625.87
738.669	630.184	738.182	621.176	743.072	636.444	740.114	634.664	739.723	634.133	743.311	636.803	746.943	640.372	752.843	644.334	756.037	646.594	761.93	674.64	762.969	675.687	764.091	679.535	764.994	676.365	763.011	662.355	754.458	643.936	765.259	658.691	767.597	641.003	752.18	633.199	755.99	630.07	755.508	626.911	754.752	626.206	760.803	630.144	752.197	618.615	761.503	626.969	759.857	625.223
738.173	629.846	738.778	621.003	742.606	636.091	739.821	634.133	739.293	633.778	742.909	636.426	746.485	640.055	752.497	643.886	755.673	646.172	761.914	673.852	762.863	674.995	764.35	678.998	765.035	675.598	762.945	661.582	753.688	644.021	765.219	657.901	766.825	640.947	751.491	633.637	755.175	630.133	754.67	626.929	754.353	625.802	760.308	629.841	751.377	618.383	760.664	627.048	759.26	624.89
737.699	629.42	738.924	620.39	742.108	635.765	739.169	633.955	738.893	633.342	742.539	636.01	746.144	639.621	751.963	643.642	755.279	645.779	762.001	673.06	762.133	674.91	765.05	678.781	764.721	675.021	763.308	661.123	753.223	643.727	765.155	657.114	766.202	640.854	750.962	634.235	754.365	630.227	753.832	626.964	753.943	625.372	759.904	629.432	750.528	618.25	760.132	626.679	758.968	624.3
737.546	628.694	739.413	620.1	741.936	635.108	739.059	633.276	738.478	632.863	742.147	635.638	745.751	639.239	751.769	643.008	754.872	645.388	761.91	672.343	761.926	674.283	765.267	678.102	764.175	674.766	763.825	660.788	752.851	643.277	765.085	656.326	766.01	640.242	750.649	634.964	753.559	630.359	752.995	627.023	753.57	624.752	759.563	628.944	749.673	618.164	759.712	626.224	758.933	623.449
737.517	627.952	740.087	620.031	741.189	634.976	738.453	632.929	737.668	632.837	741.761	635.211	745.341	638.874	751.045	642.954	754.499	644.965	761.499	671.923	761.953	673.486	765.086	677.395	763.827	674.335	764.134	660.263	752.385	642.892	765.014	655.539	765.365	639.999	750.553	635.77	752.778	630.588	752.161	627.104	752.791	624.475	758.75	628.962	748.814	618.111	759.279	625.792	758.511	622.937
737.572	627.214	740.789	620.02	740.376	635.036	737.678	632.851	736.86	632.907	741.222	634.976	744.997	638.441	750.248	643.025	754.095	644.594	760.859	671.72	761.998	672.702	764.595	676.935	763.447	673.912	764.137	659.481	751.61	642.933	764.946	654.752	764.574	640.033	750.621	636.591	752.161	631.049	751.329	627.21	751.969	624.341	757.936	629.066	747.953	618.106	758.836	625.372	757.91	622.598
737.756	626.527	741.07	619.398	740.082	634.521	736.855	632.908	736.052	632.994	740.488	635.011	744.562	638.092	749.511	642.991	753.708	644.143	760.561	670.992	761.894	671.98	763.983	676.757	762.904	673.609	764.071	658.699	750.837	643.02	764.885	653.964	764.145	639.659	750.791	637.399	751.826	631.592	750.504	627.359	751.139	624.264	757.228	628.904	747.093	618.127	758.395	624.964	757.891	621.692
738.21	626.018	741.034	618.667	739.674	634.075	736.034	632.996	735.245	633.083	740.049	634.612	744.208	637.681	748.939	642.692	753.099	643.986	760.438	670.206	761.121	671.945	764.032	675.953	762.865	672.814	763.993	657.919	750.063	643.086	764.857	653.175	763.771	639.205	750.976	638.205	751.514	632.037	749.703	627.607	750.306	624.23	756.894	628.397	746.234	618.174	757.852	624.504	757.98	620.783
738.756	625.817	741.258	618.206	738.929	633.984	735.214	633.089	734.437	633.149	739.699	634.178	743.827	637.268	748.802	642.048	752.415	643.932	760.383	669.411	760.7	671.371	763.906	675.232	762.939	672.017	763.934	657.137	749.391	642.987	764.968	652.412	763.264	638.903	750.761	638.769	750.909	632.315	749.121	628.115	749.471	624.232	756.546	627.932	745.378	618.258	757.824	623.637	758.086	619.876
738.972	625.355	741.802	617.973	738.167	633.993	734.391	633.157	733.642	633.14	739.328	633.796	743.325	636.96	748.197	641.845	751.979	643.533	760.382	668.614	760.475	670.614	763.393	674.922	763.02	671.219	764.03	656.448	748.979	642.532	765.375	651.961	763.051	638.317	750.334	639.182	750.824	633.118	748.784	628.657	748.638	624.271	755.943	627.706	744.53	618.399	757.884	622.77	758.152	618.966
738.941	624.641	742.29	617.458	738.059	633.279	733.575	633.115	733.017	632.782	738.944	633.398	742.553	637.051	747.872	641.366	751.636	643.05	760.435	667.818	760.356	669.819	762.978	674.539	762.966	670.495	764.4	655.95	748.641	642.073	766.052	651.835	762.46	637.99	749.911	639.58	750.87	633.931	748.39	629.081	747.808	624.361	755.827	627.006	743.714	618.637	757.973	621.904	757.95	618.137
739.18	624.032	742.512	616.746	737.452	632.956	733.124	632.688	732.786	632.214	738.592	632.851	742.138	636.657	747.506	640.919	750.944	643.017	760.556	667.03	760.295	669.017	762.966	673.752	762.642	669.957	765.062	655.768	747.993	642.007	766.4	651.152	761.692	637.998	749.525	640.039	750.955	634.743	747.878	629.488	746.992	624.533	755.124	626.866	743.015	619.065	758.069	621.039	757.225	617.95
739.835	623.972	742.641	615.997	736.678	632.901	732.765	632.211	732.331	631.859	737.814	632.813	741.751	636.255	746.941	640.671	750.319	642.86	760.843	666.296	760.29	668.212	762.884	673.028	761.909	669.835	765.376	655.124	747.371	641.891	766.56	650.385	761.21	637.72	749.117	640.397	751.048	635.555	747.863	630.321	746.291	624.909	754.948	626.235	742.999	619.895	758.155	620.173	756.966	617.307
740.515	623.924	742.709	615.236	735.859	632.974	732.252	631.936	731.876	631.506	737.035	632.847	741.366	635.878	747.026	639.874	749.886	642.456	761.46	666.035	760.334	667.409	762.159	672.935	761.618	669.133	765.537	654.364	746.963	641.483	766.651	649.601	760.889	637.151	748.764	641.008	751.127	636.368	747.966	631.153	745.966	625.521	755.012	625.423	742.251	620.011	758.2	619.306	756.395	616.975
741.059	623.709	742.732	614.473	735.041	633.067	732.008	631.324	731.63	630.977	736.256	632.919	741.012	635.472	746.874	639.173	749.572	641.994	761.932	665.707	760.432	666.612	761.712	672.386	761.465	668.35	765.612	653.585	746.632	640.961	766.692	648.813	760.354	636.627	748.137	641.372	751.167	637.184	748.078	631.984	745.628	625.975	755.031	624.632	741.986	620.594	758.106	618.483	755.995	616.474
741.165	623.093	742.706	613.71	734.222	633.146	731.448	631.125	730.918	630.813	735.479	633.005	740.606	635.029	746.364	638.871	749.103	641.66	761.981	664.97	760.611	665.833	761.471	671.622	761.393	667.553	765.633	652.801	745.918	640.918	766.691	648.023	759.561	636.414	747.324	641.485	750.899	637.873	748.169	632.817	744.803	625.906	754.801	623.951	741.576	621.185	757.62	617.897	755.621	615.808
741.706	622.891	742.636	612.95	733.405	633.112	730.904	630.661	730.614	630.102	734.701	633.089	739.927	634.989	745.921	638.516	748.742	641.234	761.958	664.177	760.933	665.141	761.341	670.821	761.375	666.752	765.588	652.019	745.144	640.986	766.642	647.234	758.744	636.319	746.501	641.476	750.308	638.108	748.206	633.653	743.976	625.805	754.079	623.875	740.806	621.498	757.133	617.663	754.779	615.49
742.02	622.481	742.503	612.201	733.079	632.559	730.566	629.972	730.47	629.312	733.922	633.155	739.338	634.855	745.678	637.957	748.333	640.839	762.628	664.047	761.67	665.008	761.267	670.012	761.409	665.95	765.475	651.246	744.371	641.07	766.534	646.453	757.923	636.282	745.686	641.353	749.932	638.539	748.117	634.471	743.196	625.979	754.133	623.173	739.959	621.642	756.798	617.014	753.882	615.331
742.006	621.758	742.281	611.48	732.644	632.158	730.434	629.162	730.428	628.504	733.142	633.176	738.964	634.432	744.887	638.01	747.984	640.401	762.967	663.555	761.906	664.466	761.237	669.199	761.526	665.157	765.233	650.519	743.597	641.131	766.328	645.698	757.101	636.293	745.092	640.883	749.637	639.064	747.786	635.201	742.898	626.634	754.045	622.409	739.101	621.714	756.137	616.585	752.974	615.247
742.126	621.112	741.745	611.024	732.18	631.805	730.404	628.338	730.464	627.695	732.443	633.04	738.597	633.918	744.171	637.881	748.103	639.616	763.025	662.815	762.354	664.128	761.25	668.386	761.816	664.437	764.797	649.959	743.094	640.735	765.929	645.131	756.281	636.353	744.851	640.264	748.981	639.212	747.04	635.519	742.903	627.446	753.621	621.804	738.241	621.717	755.305	616.359	752.061	615.213
742.669	620.914	741.302	610.737	731.91	631.236	730.457	627.514	730.579	626.893	731.92	632.637	737.866	633.837	743.89	637.357	747.737	639.049	763.086	662.136	762.815	663.797	761.303	667.575	762.346	664.032	764.047	649.933	742.777	640.24	765.239	644.96	755.468	636.468	744.321	640.039	748.898	639.975	746.328	635.225	742.996	628.271	752.914	621.427	737.382	621.669	754.446	616.228	751.148	615.24
743.014	620.534	740.944	610.344	731.3	631.063	730.641	626.714	730.938	626.2	731.708	632.113	737.091	633.863	743.495	636.984	747.064	638.951	763.778	662.048	763.022	663.221	761.4	666.768	762.954	663.854	763.933	649.262	742.304	639.981	765.096	644.39	754.677	636.685	743.545	640.02	748.249	640.347	745.976	634.564	742.886	628.957	752.125	621.214	736.53	621.558	753.581	616.147	750.239	615.317
743.007	619.807	740.607	609.763	730.79	630.524	731.121	626.159	731.617	626.02	731.232	631.795	736.316	633.931	742.72	636.994	746.414	638.864	764.238	661.481	763.667	663.02	761.56	665.975	762.987	663.076	763.464	648.952	741.567	640.02	764.591	644.039	754.027	637.13	742.955	639.704	747.466	640.523	745.928	633.752	742.081	628.992	751.315	621.09	735.705	621.34	752.712	616.1	749.339	615.462
743.1	619.145	739.885	609.533	730.534	629.787	731.657	625.789	731.972	625.581	730.84	631.412	735.542	634.012	742.005	636.864	745.969	638.511	764.508	660.76	764.443	663.059	761.86	665.227	763.002	662.303	762.98	648.66	741.022	639.706	763.891	643.942	754.012	637.675	742.97	638.892	746.653	640.582	746.01	632.921	742.015	629.753	750.499	621.008	735.146	620.864	751.841	616.094	748.478	615.742
743.636	618.941	739.131	609.435	730.435	628.974	732.091	625.448	731.969	624.781	730.508	630.971	734.768	634.094	741.892	636.189	745.698	637.89	764.659	659.978	764.92	662.681	762.55	665.047	763.526	662.041	762.861	648.004	740.759	639.214	763.107	644.022	754.513	638.063	742.879	638.172	745.839	640.561	745.98	632.167	741.406	629.977	749.679	620.97	734.838	620.25	750.972	616.122	748.077	616.391
744.056	618.589	738.369	609.412	730.425	628.154	732.443	624.971	732.037	624.042	729.842	630.742	733.992	634.159	741.314	635.999	744.935	637.793	764.753	659.185	765.053	661.984	762.904	664.577	764.034	661.684	762.149	647.943	740.33	638.856	762.323	644.069	755.138	638.324	742.319	637.914	745.03	640.454	745.262	632.043	741.047	630.437	748.859	620.966	734.237	620.046	750.103	616.177	747.614	616.868
744.133	617.861	737.607	609.456	730.497	627.336	732.989	624.654	732.827	624.014	729.61	630.024	733.216	634.184	740.556	635.965	744.142	637.792	764.802	658.388	765.043	661.275	762.977	663.857	764.199	660.922	761.975	647.335	739.946	638.46	762.094	643.495	755.363	639.101	741.994	637.439	744.288	640.144	745.06	631.404	740.745	631.052	748.038	620.981	733.385	620.099	749.238	616.269	746.84	616.962
744.061	617.119	736.857	609.59	730.7	626.543	732.982	623.905	732.985	623.361	729.521	629.256	732.49	634.092	739.971	635.73	743.348	637.836	764.813	657.59	765.625	661.052	763.084	663.186	764.185	660.121	761.544	646.945	740.04	637.691	761.643	643.124	755.355	639.921	741.98	636.648	744.042	639.499	745.047	630.614	740.047	631.412	747.218	621.021	732.976	619.511	748.383	616.423	746.19	617.204
743.975	616.379	736.217	609.956	731.258	626.089	733.173	623.262	733.458	623.026	729.541	628.478	731.978	633.667	739.898	635.016	742.556	637.904	764.8	656.791	766.037	660.55	763.748	663.04	764.125	659.321	760.773	646.904	739.78	637.109	760.988	643.002	755.104	640.658	741.803	635.982	743.635	639.092	744.708	630.083	739.22	631.512	746.402	621.1	732.975	618.709	747.583	616.709	745.809	617.765
743.896	615.638	735.92	610.526	731.741	625.72	733.603	622.841	733.95	622.712	729.67	627.721	731.717	633.186	739.136	634.998	741.765	637.985	764.762	655.994	765.768	660.203	763.998	662.411	764.054	658.522	759.993	646.989	739.292	636.816	760.293	642.972	754.529	640.99	741.067	635.907	743.118	638.81	743.977	629.94	738.389	631.472	745.588	621.205	732.682	618.217	747.018	617.229	745.258	618.11
743.85	614.898	735.68	611.023	732.153	625.334	734.084	622.518	734.116	622.076	730.048	627.09	731.302	632.827	738.389	634.945	740.974	638.064	764.693	655.199	765.234	659.851	764.003	661.645	763.978	657.723	759.214	647.08	738.886	636.457	760.035	642.409	754.017	641.291	741.043	635.168	742.978	638.142	743.236	629.937	737.583	631.288	744.78	621.346	732.154	617.825	746.922	617.976	744.941	618.708
744.01	614.192	734.921	610.955	732.569	624.912	734.371	621.992	734.848	622.013	730.707	626.933	730.872	632.481	737.975	634.56	740.182	638.139	764.569	654.409	764.869	659.311	764.286	661.176	763.91	656.924	758.45	647.032	738.633	635.933	759.548	642.117	753.885	641.981	740.98	634.395	742.247	638.076	743.028	629.304	737.12	630.771	743.989	621.547	731.782	617.183	746.064	617.956	744.319	618.97
744.558	613.97	734.207	611.059	733.002	624.529	734.951	621.705	734.986	621.316	731.016	626.474	730.617	632.012	737.749	633.973	739.39	638.202	764.351	653.643	764.864	658.508	764.875	660.908	763.861	656.123	758.002	646.655	738.043	635.756	759.201	641.695	753.076	641.994	740.536	633.986	741.978	637.431	742.469	628.902	736.764	630.239	743.25	621.859	731.735	616.325	745.232	618.002	743.966	619.61
744.96	613.672	733.93	611.565	733.38	624.082	734.989	620.989	734.997	620.537	730.978	625.697	729.968	631.776	736.971	633.859	738.596	638.243	763.857	653.152	764.922	657.705	765.374	660.332	763.954	655.337	757.847	646.04	737.816	635.219	758.849	641.242	753.001	642.734	739.746	633.953	741.974	636.646	742.129	629.318	736.28	629.924	743.06	622.548	731.759	615.465	745.021	618.656	744.032	620.497
744.897	612.957	733.647	612.024	733.806	623.703	735.138	620.316	735.323	620.081	730.89	624.92	729.636	631.158	736.172	633.93	737.801	638.228	763.313	652.796	764.996	656.904	765.572	659.544	764.486	655.055	757.108	646.009	737.395	634.873	758.305	640.938	752.493	643.217	739.016	633.889	742.051	635.834	741.722	629.793	736.005	629.342	742.613	623.104	731.823	614.607	744.475	618.972	743.524	620.88
744.997	612.251	732.893	611.977	734.203	623.256	735.548	619.868	735.914	619.867	731.02	624.179	729.48	630.405	735.375	634.022	737.151	637.895	762.985	652.357	765.075	656.103	765.69	658.741	765.038	654.709	756.348	645.987	736.926	634.573	757.521	641.037	751.727	643.439	738.956	633.134	741.944	635.148	741.295	630.181	735.456	629.122	741.927	623.398	731.896	613.749	744.001	619.387	743.027	621.397
745.507	611.916	732.16	612.048	734.731	622.967	736.06	619.565	735.965	619.098	731.602	623.957	729.425	629.63	734.577	634.105	736.844	637.365	763.071	651.564	765.149	655.302	765.764	657.932	765.348	654.038	756.019	645.543	736.754	633.974	757.136	640.628	750.911	643.493	738.265	633.013	741.217	635.03	740.98	630.699	734.993	628.617	741.115	623.483	731.975	612.892	743.975	620.237	742.893	622.197
746.212	611.83	731.941	612.601	735.501	622.998	736.325	618.995	736.722	619.035	732.041	623.616	729.445	628.853	733.786	634.119	736.533	636.918	762.664	651.132	765.206	654.499	765.805	657.12	765.386	653.239	755.736	645.049	736.142	633.812	756.768	640.129	750.093	643.436	737.475	632.98	741.056	634.371	740.512	631.299	734.817	627.886	740.299	623.458	732.057	612.035	743.869	620.944	742.97	623.106
746.953	611.905	731.627	613.047	736.005	622.614	736.87	618.726	736.957	618.456	732.185	622.978	729.558	628.086	733.025	633.958	735.953	636.708	762.215	650.741	765.176	653.697	765.819	656.307	765.233	652.457	755.002	644.994	735.859	633.318	756.35	639.95	749.324	643.182	737.008	632.623	741.061	633.594	739.696	631.464	734.844	627.053	739.502	623.291	732.135	611.178	743.05	620.995	743.071	624.013
747.691	612.012	730.975	613.158	736.324	622.128	737.202	618.202	737.372	618.063	732.914	622.93	729.848	627.408	732.974	633.223	735.813	636.068	761.984	650.195	764.788	653.173	765.799	655.494	764.678	652.106	754.24	644.992	735.494	632.905	755.938	640.479	749.078	642.529	736.788	632.026	740.728	633.078	738.862	631.497	734.918	626.222	739.039	622.719	732.205	610.32	742.702	621.768	743.137	624.923
748.42	612.027	730.924	613.867	736.766	621.754	737.762	617.977	737.907	617.795	733.052	622.293	730.345	626.976	732.387	633.055	735.237	635.858	762.01	649.451	764.298	652.79	765.736	654.683	764.191	651.738	754.033	644.433	734.943	632.675	756.028	641.262	748.627	642.12	736.037	631.954	739.997	632.941	738.036	631.403	735.01	625.392	739.012	621.971	732.266	609.461	742.643	622.624	742.977	625.702
748.924	611.782	730.355	614.057	737.178	621.343	738.512	617.952	738.035	617.124	733.506	621.973	731.007	626.875	731.623	633.029	734.898	635.408	761.577	649.015	763.976	652.337	765.633	653.877	764.007	651.129	753.629	644.048	734.787	632.061	755.76	641.799	747.92	642.022	735.987	631.182	739.231	633.003	737.343	631.083	735.1	624.562	738.885	621.287	732.28	608.601	742.793	623.469	742.38	626.12
748.989	611.109	729.968	614.429	737.553	620.895	739.074	617.628	738.751	617.043	734.003	621.696	730.969	626.103	731.027	632.784	734.584	634.931	761.169	648.654	764.076	651.538	765.464	653.086	764.081	650.332	752.89	643.993	734.192	631.849	755.341	642.182	747.23	641.951	735.346	631.009	739.061	632.348	736.89	630.533	735.166	623.73	738.378	620.88	732.216	607.744	743.333	623.886	741.982	626.584
749.659	611.035	729.788	615.007	738.035	620.552	739.277	617.028	738.929	616.414	734.092	621.01	731.021	625.369	730.911	632.044	733.967	634.756	760.776	648.226	763.658	651.076	765.158	652.384	763.492	650.062	752.127	644.008	733.953	631.331	754.912	642.536	747.051	641.294	734.892	630.53	738.497	632.052	736.63	630	735.173	622.898	737.561	620.875	731.802	607.149	743.98	624.231	741.466	627.011
750.373	611.006	729.096	615.071	738.362	620.058	739.854	616.778	739.41	616.079	734.828	620.968	731.425	624.982	730.973	631.255	733.844	634.071	760.236	647.967	763.213	650.718	764.58	651.942	763.163	649.601	752.048	643.321	733.945	630.601	754.602	643.033	746.439	640.985	734.738	629.735	737.751	632.016	736.061	629.7	734.912	622.251	736.746	620.963	731.3	606.74	744.379	624.923	741.086	627.488
751.026	610.845	728.959	615.693	738.842	619.714	740.177	616.288	739.911	615.759	735.016	620.376	732.015	624.799	730.435	631.026	733.172	634.032	759.488	647.995	762.816	650.323	764.09	651.653	762.765	649.18	751.525	643.037	733.783	629.981	754.16	643.322	745.668	640.994	734.725	628.91	737.18	631.808	735.74	629.217	734.375	621.857	735.93	621.06	730.871	606.348	744.544	625.775	740.639	628.128
751.495	610.338	728.51	616.001	739.218	619.281	740.581	615.877	740.081	615.11	735.404	619.983	731.986	624.028	729.881	630.656	732.427	633.98	759.045	647.602	762.439	649.894	764.05	650.969	762.15	648.968	750.776	643	733.061	629.882	753.833	643.867	744.849	641.071	734.757	628.084	736.905	631.24	735.22	628.845	734.001	621.444	735.113	621.127	730.443	605.898	744.632	626.64	739.839	628.392
751.384	609.635	727.771	616.018	739.633	618.866	741.089	615.57	740.805	615.03	736.005	619.806	732.009	623.265	729.552	629.966	731.937	633.62	758.69	647.125	761.984	649.548	763.884	650.316	761.359	649.049	750.108	642.93	732.686	629.321	753.334	644.316	744.221	640.891	734.815	627.259	736.304	631.04	734.84	628.309	733.532	621.089	734.391	620.989	730.068	605.493	744.662	627.51	738.941	628.357
750.973	609.085	727.057	616.056	740.052	618.449	741.308	614.995	741.003	614.375	736.006	619.045	732.502	622.977	729.434	629.173	731.935	632.839	758.067	646.996	761.634	649.092	763.46	649.871	761.094	648.502	750.055	642.207	732.509	628.572	752.574	644.505	743.927	640.305	734.886	626.435	736.071	630.451	734.819	627.473	733.091	620.639	733.881	620.556	729.664	604.813	744.648	628.38	738.236	627.961
750.361	608.688	726.977	616.728	739.963	617.634	742.049	614.83	741.009	613.6	736.009	618.276	733.012	622.708	729.416	628.371	731.896	632.135	757.396	646.911	761.202	648.72	762.984	649.569	760.636	648.115	749.417	642.022	732.438	627.8	751.788	644.573	743.38	640.051	734.962	625.611	735.588	630.166	734.876	626.637	732.985	619.943	733.678	620	728.896	604.518	744.572	629.246	737.821	627.365
749.663	608.435	726.483	617.023	740.285	617.086	742.37	614.142	741.287	613.103	736.502	617.994	733.094	622.015	729.473	627.573	731.283	631.953	756.946	646.518	760.808	648.309	762.679	649.002	759.975	647.998	748.658	642.018	732.445	627.023	750.999	644.555	743.092	639.507	735.039	624.788	735.085	629.781	734.963	625.803	732.834	619.322	733.104	619.744	728.051	604.368	744.404	630.096	737.408	626.88
748.934	608.286	725.736	617.035	740.818	616.771	742.493	613.335	741.915	612.88	736.975	617.696	733.808	621.964	729.646	626.799	730.771	631.539	756.629	646.011	760.432	647.886	761.95	649	759.313	647.922	748.104	641.83	732.537	626.253	750.218	644.46	742.62	639.163	735.115	623.964	734.773	629.117	735.057	624.969	732.347	618.951	732.789	619.281	727.194	604.298	744	630.764	736.883	626.484
748.197	608.185	724.978	616.943	741.031	616.196	742.486	612.515	742.302	612.259	736.995	616.954	733.986	621.374	730.023	626.201	730.52	630.795	755.899	646.023	759.985	647.546	761.303	648.845	759.012	647.398	748.01	641.128	732.758	625.52	749.508	644.214	742.179	638.76	735.18	623.14	734.75	628.301	735.138	624.134	731.822	618.492	732.323	618.902	726.334	604.287	743.391	631.167	736.512	625.95
747.455	608.128	724.249	617.001	741.085	615.466	742.335	611.722	742.206	611.475	737.003	616.187	734.013	620.632	730.674	625.956	730.4	630.011	755.286	645.835	759.654	647.021	760.873	648.427	758.528	647.03	747.308	640.999	733.198	625.025	748.968	643.76	741.976	638.122	735.226	622.314	734.796	627.485	735.183	623.297	731.755	617.663	731.829	618.475	725.475	604.325	742.979	631.552	735.897	625.583
746.709	608.12	724.023	617.536	741.419	614.95	741.951	611.03	741.669	611.092	737.602	616.008	734.187	620.036	730.913	625.443	730.364	629.217	754.862	645.427	758.942	647.002	760.54	647.954	757.803	647.026	746.546	641.02	733.94	624.994	748.881	643.074	742.033	637.334	735.239	621.488	734.863	626.67	735.081	622.513	731.76	616.829	731.72	617.665	724.621	604.418	742.525	632.008	735.918	624.673
745.965	608.158	723.7	617.98	742.123	614.762	741.188	610.984	741.24	610.709	737.967	615.599	734.899	619.983	731.404	625.146	730.379	628.424	754.55	644.953	758.313	646.846	759.734	648.042	757.252	646.807	746.109	640.706	733.963	624.262	748.191	643.021	741.454	637.047	735.154	620.676	734.94	625.857	734.678	621.911	731.804	615.996	731.716	616.845	723.784	604.608	742.117	632.418	736.031	623.767
745.225	608.233	722.958	618.018	742.366	614.016	740.999	610.351	740.945	610.192	738.2	615.058	734.99	619.3	731.829	624.735	730.453	627.634	754.071	644.644	757.882	646.435	759.13	647.779	756.886	646.329	745.895	640.112	733.963	623.501	747.458	642.966	741.126	636.557	734.816	620.091	735.021	625.043	734.031	621.773	731.868	615.163	731.755	616.025	723.124	605.065	741.72	633.023	736.122	622.858
744.491	608.353	722.215	618	742.39	613.207	740.562	609.81	740.407	609.668	738.912	614.996	735.494	619.026	732.019	624.113	730.614	626.864	753.737	644.139	757.557	645.946	758.809	647.285	756.427	645.944	745.218	639.902	734.29	623.056	746.97	642.645	740.682	636.184	734.137	619.94	735.101	624.23	733.818	621.164	731.942	614.332	731.813	615.206	722.857	605.72	741.028	633.354	735.83	622.112
743.773	608.543	722.04	618.567	742.173	612.448	739.807	609.533	739.625	609.467	738.976	614.284	735.988	618.74	731.961	623.351	730.91	626.137	753.132	643.989	756.759	646.031	758.432	646.87	755.632	646.045	744.444	639.963	734.913	622.896	746.852	641.977	740.249	635.799	733.993	619.235	735.169	623.416	733.271	620.866	732.02	613.501	731.881	614.388	722.319	605.983	740.173	633.384	735.22	621.798
743.221	608.965	721.678	619.043	741.687	611.933	738.991	609.426	738.821	609.37	739.515	614.045	736.058	618.027	732.514	623.053	731.63	626.041	752.44	643.93	756.185	645.775	757.945	646.545	755.172	645.695	743.665	640.053	734.972	622.189	746.072	641.953	739.923	635.311	734.012	618.427	735.205	622.599	732.964	620.351	732.099	612.67	731.955	613.571	721.513	606.015	739.413	633.132	734.837	621.277
742.931	609.523	720.957	619.226	740.994	611.829	738.167	609.415	738.011	609.341	739.953	613.698	736.797	617.99	732.86	622.596	731.92	625.529	751.952	643.57	755.821	645.306	757.71	645.914	754.779	645.241	742.888	640.096	735.596	622.048	745.289	642.029	739.386	635.023	733.553	618.083	735.174	621.785	732.936	619.569	732.169	611.838	732.034	612.754	720.927	606.352	738.909	632.58	734.345	620.854
742.699	610.036	720.194	619.235	740.913	611.069	737.346	609.497	737.202	609.37	740.097	613.054	736.996	617.412	733.277	622.223	731.975	624.806	751.679	643.018	755.371	644.971	756.901	645.953	754.255	644.963	742.189	639.984	736.338	622.038	744.532	642.018	739.106	634.507	732.979	617.731	734.851	621.212	732.695	618.967	732.229	611.005	732.109	611.936	720.761	607.04	738.662	631.986	733.871	620.425
741.958	610.047	719.431	619.2	740.282	610.658	736.565	609.719	736.398	609.464	740.842	613.015	737.379	617.027	733.732	621.863	732.098	624.163	750.963	643.023	754.601	645.008	756.093	646.041	753.478	645.038	742.04	639.334	736.925	621.841	743.99	641.736	738.638	634.108	732.643	617.058	734.311	620.853	731.942	618.857	732.272	610.172	732.182	611.119	720.018	607.171	737.801	632.107	733.486	619.907
741.217	609.981	718.668	619.148	739.501	610.449	736.119	610.235	735.613	609.659	741.307	612.48	738.015	616.845	734.052	621.328	732.764	624.033	750.317	642.867	754.045	644.715	755.383	645.933	753.072	644.599	741.498	639.111	737.101	621.146	743.953	640.992	737.952	634.007	732.593	616.238	733.948	620.383	731.633	618.111	732.277	609.338	732.242	610.3	719.846	607.862	737.079	631.835	732.952	619.535
740.475	609.914	717.906	619.084	738.684	610.36	735.816	610.806	735.099	610.177	741.355	611.797	738.409	616.205	733.958	620.532	732.974	623.412	749.875	642.469	753.772	644.16	754.902	645.531	752.688	644.145	741.145	638.685	737.001	620.375	743.172	641.045	737.295	633.9	732.766	615.439	734.027	619.571	731.486	617.293	732.192	608.522	732.281	609.481	719.268	608.132	736.951	631.104	732.957	618.659
739.744	609.9	717.145	619.011	737.862	610.339	735.173	610.99	734.772	610.703	741.026	611.14	738.545	615.445	734.377	620.14	732.987	622.667	749.602	641.959	753.182	643.993	754.678	644.94	752.078	643.996	740.848	638.191	737.466	620.107	742.408	641.016	736.938	633.387	733.364	615.082	733.632	619.162	731.431	616.458	731.682	607.976	732.293	608.661	718.9	608.604	736.867	630.357	732.724	617.96
739.066	610.076	716.384	618.94	737.04	610.376	734.352	610.919	734.4	611.125	740.429	610.66	738.598	614.67	734.807	619.729	733.238	622.163	749.054	641.701	752.468	643.936	753.87	645.028	751.389	643.933	740.234	638.017	738.017	619.781	741.987	640.619	736.479	633.052	733.797	614.673	733.085	618.781	731.435	615.621	731.171	607.698	732.245	607.844	718.509	609.064	736.424	629.923	731.909	617.835
738.93	610.699	715.622	618.872	736.226	610.496	734.079	611.505	733.922	611.477	739.688	610.415	738.579	613.893	735.016	619.142	733.802	621.921	748.766	641.201	751.942	643.613	753.194	644.847	750.946	643.514	740.068	637.392	738.39	619.15	741.955	639.851	736.093	632.594	734.187	614.258	732.664	618.219	731.493	614.786	730.793	607.263	731.938	607.121	717.977	609.382	735.879	629.54	731.568	617.012
738.54	611.074	714.86	618.811	735.464	610.764	733.599	611.862	733.642	612.01	738.923	610.267	738.484	613.123	734.986	618.39	734.064	621.308	748.323	640.839	751.731	643.001	752.863	644.335	750.601	643.08	739.562	637.111	738.539	618.389	742.007	639.08	735.68	632.243	734.669	613.905	732.527	617.419	731.616	613.957	730.379	606.84	731.352	606.859	718.006	610.223	735.815	628.677	731.443	616.112
737.804	611.107	714.097	618.76	735.085	611.328	733.185	612.267	733.126	612.29	738.147	610.188	738.221	612.4	735.49	618.038	733.995	620.53	747.983	640.411	750.988	643.022	752.449	643.968	750.184	642.697	739.157	636.732	738.602	617.615	741.279	639.027	735.17	631.879	734.99	613.402	732.519	616.603	731.916	613.188	729.908	606.481	730.931	606.476	717.88	610.98	735.862	627.808	731.428	615.201
737.062	611.041	713.333	618.754	734.776	611.866	732.877	612.793	732.791	612.794	737.366	610.164	737.642	612.068	735.853	617.608	733.945	619.741	748.062	639.638	750.313	642.88	751.663	644.005	749.787	642.29	738.903	636.208	738.615	616.838	741.013	638.498	734.655	631.353	735.492	613.08	732.637	615.797	732.627	613.023	729.596	605.948	730.625	605.94	717.146	611.1	735.946	626.942	731.517	614.294
736.321	610.962	712.587	618.853	734.07	611.979	732.247	613.038	732.245	613.029	736.586	610.193	737.23	611.7	736.269	617.23	734.182	619.196	747.772	639.01	749.878	642.475	750.971	643.806	749.398	641.879	738.297	636.043	738.578	616.063	741.01	637.723	734.392	630.578	735.871	612.616	733.061	615.198	733.159	612.571	729.088	605.661	729.821	605.919	716.917	611.735	736.039	626.077	731.803	613.452
735.579	610.894	712.109	619.213	733.251	611.927	731.428	612.953	731.506	613.046	735.811	610.291	736.973	611.204	736.695	616.849	734.735	618.935	747.064	638.954	749.615	641.941	750.829	643.159	748.971	641.508	738.099	635.472	738.49	615.291	740.921	637.055	734.226	629.772	736.296	612.233	733.619	614.828	733.414	611.798	728.789	605.015	729.007	606.023	716.39	612.077	736.125	625.211	732.426	613.026
734.843	610.87	711.957	619.839	733.058	612.587	731.098	613.461	730.952	613.352	735.054	610.468	736.449	610.705	737.063	616.407	734.983	618.37	746.389	638.865	749.003	641.738	750.319	642.875	748.614	641.052	737.646	635.143	738.281	614.546	740.158	637.023	734.103	628.959	736.823	611.882	734.016	614.46	733.513	610.968	728.154	604.677	728.252	605.922	715.926	612.48	736.177	624.342	732.928	612.64
734.155	611.022	711.308	619.971	732.541	612.898	730.647	613.842	730.735	613.952	734.403	610.801	735.705	610.52	737.495	616.102	734.944	617.605	745.935	638.518	748.786	641.158	749.914	642.479	748.216	640.699	737.203	634.805	737.768	614.153	740.032	636.36	734.014	628.141	737.361	611.386	733.935	613.656	733.532	610.13	727.333	604.616	727.927	605.405	715.647	613.059	736.071	623.517	732.948	611.777
733.991	611.609	710.572	619.953	732.131	613.307	730.221	614.223	730.035	613.999	733.945	611.336	734.935	610.436	738.075	615.702	735.293	617.13	745.708	637.907	748.297	640.843	749.641	641.947	747.84	640.231	736.987	634.242	737.244	613.809	739.562	636.044	733.947	627.321	737.571	610.591	734.246	613.053	733.461	609.295	726.555	604.774	727.609	604.969	714.974	613.234	735.651	622.941	733.172	611.058
733.639	611.985	710.123	620.249	731.836	613.831	729.932	614.754	729.355	614.119	733.755	611.917	734.159	610.431	738.397	615.056	735.952	616.985	744.929	637.788	747.999	640.385	748.971	641.804	747.337	639.832	736.38	634.001	736.905	613.323	739.067	635.754	733.892	626.499	737.604	609.767	734.772	612.782	733.247	608.495	725.957	605.238	727.009	605.158	714.886	613.996	734.99	622.769	734.012	610.953
732.909	611.984	709.915	620.826	731.214	614.022	729.34	615.09	728.905	614.512	733.089	611.963	733.385	610.491	738.495	614.265	736.684	617.005	744.134	637.791	748.03	639.618	748.849	641.106	746.542	639.768	735.631	634.035	736.932	612.546	738.942	635.096	733.862	625.677	737.472	608.961	735.14	612.339	732.683	608.087	725.85	605.945	726.995	605.96	714.062	614.017	735.036	621.913	734.888	610.995
732.197	612.012	709.275	620.951	731.073	614.671	728.522	614.997	728.635	615.065	732.407	612.063	732.625	610.657	738.482	613.466	737.057	616.464	743.337	637.84	747.789	638.959	748.261	640.872	745.741	639.8	735.162	633.738	737.001	611.771	738.238	635.02	733.841	624.854	737.092	608.282	735.574	611.97	732.196	607.708	725.11	606.014	726.226	606.063	713.276	614.079	734.912	621.117	734.999	610.183
732.017	612.569	709.093	621.527	730.485	614.963	727.703	614.935	727.829	615.043	731.917	612.409	732.148	611.15	738.341	612.68	737.023	615.707	742.541	637.908	747.018	638.96	747.895	640.417	744.942	639.86	734.848	633.242	737.078	610.997	738.048	634.43	733.836	624.031	736.458	607.898	736.36	612.002	731.891	607.19	724.282	605.946	725.413	606.019	712.96	614.614	734.244	620.92	735.731	610.028
731.686	612.977	708.684	621.906	729.724	614.993	727.184	615.248	727.023	614.956	731.746	613.008	731.805	611.682	737.874	612.131	737.285	615.229	741.746	637.986	746.328	638.869	747.584	639.916	744.143	639.934	734.287	633.043	737.148	610.222	737.619	634.078	733.844	623.208	735.674	607.885	736.993	611.765	731.227	606.925	723.5	605.996	724.597	605.933	712.523	615.116	733.939	620.367	736.417	609.536
731.018	613.052	708.01	622.014	729.187	615.22	726.815	615.73	726.33	615.089	731.164	613.206	731.406	612.043	737.336	611.812	737.797	614.892	740.952	638.068	745.928	638.468	746.959	639.742	743.345	640.016	733.998	632.462	737.199	609.446	737.104	633.812	733.863	622.385	735.086	607.75	737.198	611.174	730.395	607.028	722.956	606.349	723.788	605.906	711.689	615.265	733.481	619.962	736.852	608.77
731.008	613.786	707.251	621.939	728.924	615.792	726.34	616.057	725.905	615.525	730.858	613.707	730.632	611.976	736.903	611.455	738.319	614.424	740.156	638.142	745.647	637.911	746.845	639.057	742.547	640.096	733.983	631.736	737.168	608.671	737.013	633.12	733.897	621.563	734.857	607.078	737.748	610.879	730.115	606.496	722.807	607.011	723.057	606.073	710.83	615.279	732.99	619.589	737.084	607.896
730.467	613.988	707.073	622.544	728.287	616.09	726.053	616.577	725.622	616.062	730.427	614.046	729.857	611.912	736.607	610.928	738.5	613.653	739.36	638.2	744.862	637.788	746.238	638.879	741.747	640.167	733.773	631.22	736.787	608.165	736.286	633.06	733.948	620.741	734.271	606.635	738.029	610.483	729.668	605.951	721.984	606.976	722.998	606.818	709.97	615.25	732.969	618.748	737.154	606.994
730.028	614.288	706.631	622.874	727.47	615.994	725.545	616.962	724.813	616.031	729.673	614.008	729.27	612.144	736.053	610.705	738.571	612.865	738.563	638.228	744.058	637.816	745.938	638.357	740.947	640.217	733.221	630.965	736.338	607.787	736.064	632.484	734.013	619.921	733.49	606.394	737.687	609.95	728.976	605.651	721.225	607.07	722.332	606.975	709.111	615.193	732.855	618.01	737.059	606.096
729.948	614.943	706.173	623.175	726.651	615.926	724.808	616.988	724.008	615.935	729.06	614.213	728.865	612.579	735.821	610.048	738.567	612.072	737.772	638.197	743.256	637.874	745.541	637.873	740.147	640.217	732.714	630.463	735.947	607.44	735.668	632.089	734.107	619.103	732.675	606.256	736.978	609.848	728.149	605.636	720.947	607.623	721.546	607	708.253	615.125	732.059	617.951	736.789	605.238
729.256	615.001	706.027	623.785	726.167	616.264	724.242	617.208	723.289	616.076	728.846	614.813	728.552	613.044	735.232	609.751	738.483	611.285	737.073	637.922	742.455	637.948	744.741	637.766	739.426	640.049	732.497	629.728	735.56	607.021	735.069	631.881	734.229	618.29	731.854	606.164	736.885	609.13	727.378	605.828	720.532	608.03	721.061	607.317	707.395	615.052	731.806	617.174	736.335	604.463
728.532	615.001	705.412	623.979	725.816	616.784	723.869	617.699	722.897	616.549	728.33	615.091	727.779	612.964	734.505	609.852	738.293	610.529	736.898	637.288	741.654	638.029	743.929	637.775	738.889	639.619	732.372	628.957	735.181	606.656	734.887	631.16	734.389	617.484	731.029	606.103	736.301	608.913	727.034	606.456	719.98	608.309	720.851	607.918	706.538	614.976	731.754	616.314	735.711	603.812
728.058	615.249	704.694	623.984	725.209	617.023	723.359	618.059	722.597	617.044	727.554	615.064	727.219	613.206	733.96	610.278	737.768	610.021	736.458	636.931	740.853	638.112	743.117	637.83	738.713	639.058	732.305	628.176	734.823	606.161	734.966	630.377	734.615	616.699	730.203	606.069	735.95	608.451	726.626	606.956	719.856	609.017	720.094	608.001	705.68	614.903	731.78	615.445	734.957	603.302
727.978	615.907	704.171	624.188	724.391	616.93	722.54	617.957	721.794	616.976	726.777	614.975	726.844	613.644	733.866	610.972	737.261	609.764	735.936	636.643	740.051	638.173	742.307	637.903	738.182	638.787	732.281	627.393	734.339	605.751	735.021	629.591	735.088	616.066	729.376	606.064	735.613	607.961	725.907	607.065	719.052	609.051	719.295	607.988	704.822	614.834	731.836	614.577	734.115	602.949
727.306	615.999	703.96	624.763	724.082	617.48	722.14	618.381	721.083	617.138	725.998	614.902	726.463	614.035	733.129	611.052	736.907	609.301	735.825	635.951	739.247	638.195	741.497	637.983	737.836	638.339	732.305	626.608	733.581	605.722	734.737	629.112	735.746	615.888	728.55	606.082	734.807	607.943	725.072	607	718.95	609.787	719.06	608.557	703.964	614.771	731.908	613.709	733.242	602.69
726.587	616.001	703.38	624.94	723.617	617.849	721.724	618.864	720.875	617.75	725.313	615.058	725.691	613.948	732.334	611.002	736.518	608.768	735.103	635.878	738.492	638.071	740.688	638.063	737.488	637.897	732.386	625.829	733.094	606.203	734.086	628.936	735.981	615.357	727.724	606.118	733.997	608.048	724.237	606.913	718.381	610.051	718.608	608.916	703.104	614.74	731.989	612.843	732.354	602.484
726.091	616.215	703.125	625.435	723.221	618.263	721.101	619.103	720.37	618.016	724.919	615.494	725.138	614.232	731.535	610.923	735.755	608.58	734.901	635.292	737.975	637.684	739.878	638.139	736.95	637.636	732.534	625.061	732.814	606.764	733.669	628.319	736.008	614.574	726.899	606.179	733.233	607.966	723.402	606.841	717.963	610.463	718.069	609.208	702.244	614.753	732.071	611.976	731.451	602.351
726.014	616.869	702.761	625.85	722.889	618.767	720.28	619.049	719.594	618.027	724.691	616.023	724.807	614.694	730.751	610.902	734.965	608.624	734.473	634.933	737.886	636.989	739.067	638.202	736.735	637.046	732.825	624.382	732.337	607.052	733.507	627.558	736.267	613.959	726.08	606.292	732.969	607.4	722.564	606.826	717.688	611.017	717.988	609.983	701.404	614.892	732.152	611.109	730.543	602.264
725.372	617.1	702.149	626.031	722.305	619.103	719.46	618.951	718.944	618.235	723.917	615.982	724.46	615.117	730.032	611.084	734.277	608.929	733.963	634.656	737.089	637.028	738.254	638.221	736.185	636.787	733.388	623.932	731.562	606.997	733.441	626.774	736.996	613.881	725.272	606.46	732.581	606.975	722.054	607.312	717.005	611.16	718.046	610.793	701.013	615.432	732.217	610.241	729.631	602.211
724.661	617.157	701.39	625.958	721.486	619.027	718.637	618.906	718.866	618.948	723.234	616.096	723.964	615.397	729.941	611.792	733.936	609.495	733.843	633.988	736.323	636.98	737.486	638.081	735.834	636.338	733.86	623.678	730.788	606.914	733.449	625.986	737.003	613.098	724.504	606.742	731.775	606.976	721.707	607.796	716.939	611.92	717.373	610.949	700.687	615.978	732.262	609.372	728.719	602.201
723.917	617.116	701.116	626.445	720.668	618.959	718.159	619.3	718.149	619.004	722.933	616.585	723.727	615.981	729.372	611.998	733.688	610.021	733.127	633.912	735.981	636.511	736.998	637.66	735.461	635.902	734.218	623.269	730.198	607.168	733.529	625.202	737.067	612.325	724.042	607.265	730.99	606.962	721.291	608.198	716.231	612.039	717.081	611.477	699.875	616.03	732.268	608.503	727.806	602.226
723.175	617.047	700.725	626.846	720.208	619.293	717.765	619.802	717.4	619.068	722.603	617.04	723.049	616.013	728.597	612.008	732.897	609.964	732.935	633.311	735.711	635.978	736.852	637.023	734.937	635.609	734.626	622.871	729.872	607.679	733.727	624.44	737.521	611.946	723.859	607.908	730.971	606.169	720.857	608.605	715.983	612.62	716.7	611.935	699.02	615.94	732.162	607.652	726.895	602.277
722.434	616.969	700.124	627.022	719.84	619.815	717.203	620.094	716.951	619.439	721.83	617.05	722.392	616.111	727.993	612.212	732.159	610.058	732.487	632.958	734.995	635.89	736.057	637.03	735.018	634.814	735.058	622.493	729.502	608.129	734.313	624.078	738.031	611.677	723.12	607.965	730.407	605.724	720.499	609.077	715.536	613.006	715.944	612.019	698.173	615.982	731.774	607.05	725.987	602.372
721.691	616.903	699.365	626.948	719.256	620.195	716.38	620.046	716.736	620.039	721.054	616.954	721.927	616.456	727.965	612.984	731.951	610.655	731.96	632.685	735	635.11	735.287	636.983	734.819	634.173	734.981	621.713	728.729	608.174	734.764	623.704	737.92	611.029	722.302	607.958	729.643	605.494	719.985	609.399	714.723	613.018	715.148	611.971	698.027	616.682	731.087	606.872	725.082	602.493
720.95	616.88	699.109	627.465	718.434	620.231	715.56	619.953	715.946	620.146	720.328	617.029	721.732	617.063	727.202	613.001	731.546	611.049	731.972	631.894	734.981	634.327	735.012	636.45	734.322	633.852	735.251	621.202	727.952	608.126	735.128	623.312	737.111	611.022	722.048	608.538	728.835	605.389	719.665	609.913	714.021	613.122	715.049	612.7	697.449	617.059	731.004	606.105	724.182	602.645
720.213	616.935	698.697	627.853	717.612	620.197	714.737	619.89	715.138	620.079	719.965	617.471	720.977	617.093	726.417	613.007	730.757	611.034	731.948	631.136	734.518	633.987	734.638	636.017	733.957	633.437	735.742	620.85	727.177	608.055	735.611	623.002	737.022	610.299	721.605	608.913	728.02	605.351	719.189	610.272	714.001	613.929	714.462	612.969	696.632	617.132	730.222	606.015	723.295	602.864
720.079	617.547	698.097	628.024	716.791	620.136	714.194	620.229	714.331	619.99	719.745	618.035	720.204	617.033	725.995	613.382	729.968	610.934	731.325	630.964	734.008	633.698	733.989	635.838	733.966	632.668	736.162	620.406	726.403	607.976	735.976	622.52	737.027	609.488	721.098	609.229	727.203	605.375	718.79	610.712	713.246	614.093	713.693	612.996	695.774	617.069	730.045	605.348	722.427	603.144
719.667	617.959	697.345	627.954	715.971	620.063	713.811	620.754	713.523	619.906	718.97	618.049	719.431	616.95	725.812	613.997	729.196	611.015	730.811	630.561	733.876	633.032	733.887	635.046	733.785	632.037	736.217	619.626	725.629	607.897	735.983	621.801	736.662	609.039	720.983	609.957	726.393	605.474	718.388	611.148	712.42	614.066	713.138	613.216	694.918	616.98	729.531	604.792	721.609	603.535
719.034	618.155	697.109	628.488	715.151	619.985	713.314	621.125	712.727	619.903	718.194	617.956	718.675	616.921	725.031	614.008	728.965	611.587	730.58	629.82	733.138	632.974	733.975	634.239	733.123	631.867	736.183	618.842	724.854	607.833	736.196	621.247	736.056	608.82	721.04	610.777	725.623	605.706	717.917	611.517	711.59	613.978	712.936	613.849	694.062	616.889	728.75	604.479	721.083	604.189
718.289	618.137	696.684	628.898	714.331	619.907	712.49	621.104	711.993	620.101	717.428	617.983	718.063	617.187	724.238	613.999	728.6	612.019	730.513	629.027	732.996	632.315	734.003	633.432	732.69	631.334	736.124	618.06	724.076	607.816	736.654	620.881	735.995	608.07	720.38	610.95	725.129	606.185	717.586	612.031	710.765	613.939	712.262	614.109	693.204	616.825	727.896	604.331	720.708	604.737
717.546	618.076	696.077	629.093	713.511	619.833	711.669	621.022	711.945	620.838	716.969	618.34	717.845	617.777	724.005	614.557	727.83	612.038	730.566	628.232	732.496	632.014	733.609	633.026	732.464	630.575	736.052	617.278	723.383	607.993	737.01	620.441	735.237	607.913	720.092	611.478	724.86	606.778	717.097	612.349	710.051	614.105	711.454	614.066	692.363	616.925	727.029	604.255	720.219	605.181
716.804	618.005	695.316	629.034	712.69	619.777	710.848	620.934	711.306	621.03	716.857	619	717.357	618.052	723.628	615.011	727.041	611.94	730.783	627.482	731.885	631.723	732.958	632.799	732.341	629.784	735.977	616.497	722.924	608.407	737.449	620.147	734.429	607.958	719.675	611.875	724.254	606.954	716.744	612.903	709.999	614.863	710.638	613.979	692.081	617.518	726.16	604.224	719.928	605.837
716.063	617.93	694.557	628.939	711.868	619.747	710.025	620.887	710.511	621.002	716.1	619	716.582	618	722.867	615.081	726.266	612	731.298	627.1	731.562	631.005	732.564	632.127	732.273	628.985	735.91	615.716	722.795	609.025	737.983	619.758	733.611	608.009	719.172	612.184	724.083	607.6	716.087	613.079	709.295	615.131	709.823	613.933	691.594	617.912	725.29	604.234	720.009	606.745
715.321	617.858	693.797	628.902	711.049	619.775	709.349	621.074	709.718	620.969	715.336	619.016	715.809	617.906	722.069	614.995	725.997	612.532	731.875	626.847	731.425	630.214	732.384	631.334	732.246	628.184	735.882	614.932	722.025	608.97	738.385	619.179	733.084	607.737	718.981	612.801	723.549	607.931	715.253	613.004	708.483	615.179	709.2	614.12	690.811	617.982	724.422	604.289	719.968	607.558
714.577	617.814	693.25	629.139	710.341	619.984	708.9	621.541	709.034	621.129	714.99	619.444	715.146	618.125	721.272	614.904	725.653	612.988	732.049	626.157	731.372	629.412	732.272	630.529	732.258	627.382	736.1	614.289	721.327	609.071	738.567	618.413	732.908	607.057	718.308	613.036	722.815	607.989	714.499	613.023	707.65	615.135	709.033	614.762	690.161	618.149	723.56	604.408	719.502	608.083
713.837	617.834	692.92	629.631	709.915	620.517	708.598	622.105	708.988	621.874	714.752	619.999	714.874	618.663	720.49	614.946	724.901	613.041	731.959	625.363	731.374	628.609	732.201	629.719	732.309	626.582	736.572	613.892	720.934	609.47	738.662	617.63	732.262	606.628	717.503	612.986	722.201	608.14	713.983	613.401	706.818	615.063	708.389	615.122	689.948	618.803	722.725	604.632	718.954	608.456
713.227	618.025	692.496	629.965	709.569	620.929	707.774	622.093	708.297	622.087	714.019	620.119	714.497	619.033	720.07	615.351	724.112	612.942	731.925	624.568	731.433	627.809	732.159	628.907	732.4	625.786	737.188	613.668	720.732	610.028	738.699	616.84	731.463	606.454	717.152	613.4	721.949	608.739	713.72	614.055	705.988	614.98	707.597	615.161	689.242	618.945	722.163	605.132	719.06	609.362
713.023	618.625	691.787	629.933	709.162	621.328	706.952	622.017	707.499	622.091	713.24	620.045	713.737	618.995	719.832	615.903	723.336	612.984	732.286	624.131	731.567	627.02	732.138	628.095	732.549	624.999	737.453	612.938	720.049	610.116	738.695	616.051	730.647	606.356	716.78	613.938	721.349	608.949	712.959	614.205	705.157	614.899	706.778	615.108	688.403	618.907	721.788	605.722	718.681	609.972
712.542	618.915	691.217	630.156	708.765	621.791	706.131	621.929	706.691	622.009	712.463	619.963	713.058	619.151	719.1	615.97	723.031	613.478	732.858	623.863	731.834	626.269	732.143	627.281	732.864	624.272	737.587	612.169	719.917	610.753	738.646	615.263	729.826	606.31	716.1	614.27	721.094	609.511	712.123	614.21	704.325	614.832	705.961	615.03	687.937	619.463	721.226	605.992	718.109	610.303
711.902	618.983	690.927	630.703	708.199	622.034	705.309	621.866	705.885	621.917	711.696	619.948	712.876	619.743	719.049	616.726	722.704	613.94	733.104	623.21	732.502	626.076	732.186	626.469	733.492	624.021	737.662	611.39	719.448	611.056	738.549	614.479	729.004	606.31	715.276	614.332	720.627	609.856	711.286	614.161	703.492	614.796	705.144	614.946	687.846	620.266	720.394	605.945	717.732	610.841
711.273	619.038	691.036	631.459	707.455	622.032	704.536	621.928	705.076	621.846	711.071	620.132	712.41	620.049	718.461	616.948	721.97	614.003	733.026	622.415	732.901	625.62	732.256	625.659	733.953	623.672	737.693	610.607	718.963	611.345	738.373	613.71	728.182	606.359	714.449	614.323	720.198	610.232	710.45	614.09	702.67	614.862	704.327	614.868	687.943	621.12	720.009	606.511	717.217	611.24
711.054	619.591	690.654	631.866	706.988	622.431	703.936	622.3	704.295	621.968	711.031	620.848	711.643	620.035	718.068	617.359	721.188	613.991	732.935	621.622	733.008	624.933	732.361	624.854	734.003	622.926	737.687	609.823	718.869	612.027	737.911	613.158	727.367	606.47	713.622	614.294	719.911	610.749	709.615	614.013	702.108	615.21	703.508	614.82	688.045	621.973	719.55	606.887	716.792	611.73
710.584	619.913	690.263	632.243	706.653	622.951	703.753	622.902	704.037	622.535	710.37	621.1	710.87	619.943	717.829	617.928	721.035	614.619	732.902	620.829	732.935	624.133	732.528	624.062	733.911	622.129	737.629	609.041	718.145	612.077	737.347	612.847	726.576	606.687	712.797	614.252	719.314	610.965	708.78	613.933	701.906	615.845	702.692	614.852	687.986	622.74	719.099	607.355	716.337	612.181
709.953	620	689.886	632.62	705.943	622.991	703.227	623.194	703.634	622.929	709.609	621.155	710.19	620.093	717.099	618.035	720.563	614.949	733.091	620.197	732.915	623.334	732.804	623.306	733.963	621.344	737.506	608.268	717.945	612.66	736.955	612.466	726.124	607.222	711.971	614.198	719.083	611.549	707.945	613.858	701.207	615.993	702.171	615.218	687.328	623.001	719.002	608.081	715.867	612.634
709.307	620.026	689.506	633.005	705.303	623.158	702.859	623.67	702.872	622.968	708.829	621.108	709.935	620.627	716.302	617.978	719.826	615.004	733.723	619.988	733.501	623.097	733.469	623.032	734.482	621.058	737.248	607.55	717.552	613.036	736.984	611.68	725.756	607.755	711.147	614.134	718.583	611.871	707.108	613.804	700.388	615.964	701.826	615.747	687.073	623.578	718.822	608.734	715.364	613.039
709.061	620.55	689.116	633.372	704.87	623.589	702.409	624.029	702.108	623.006	708.05	621.033	709.57	621.071	716.068	618.526	719.12	615.056	733.915	619.42	733.91	622.634	733.868	622.598	734.917	620.688	736.797	607.022	716.788	613.028	737.076	610.895	725.208	608.002	710.322	614.069	718.194	612.295	706.27	613.791	700.088	616.487	701.276	616.015	686.532	623.886	718.344	609.159	714.518	613.028
708.617	620.899	688.748	633.767	704.502	624.045	701.622	624.001	701.998	623.741	707.272	620.953	708.807	621.148	715.662	618.982	719.033	615.751	734.414	619.132	734.039	621.959	733.969	621.939	734.996	619.959	736.077	606.976	716.048	613.054	737.131	610.108	724.405	607.935	709.498	613.999	717.857	612.789	705.497	613.927	699.644	616.869	700.461	615.939	686.157	624.365	717.92	609.59	713.925	613.41
708.005	621.009	688.377	634.149	703.685	623.953	700.979	624.244	702.014	624.519	706.493	620.879	708.031	621.092	714.937	619.128	718.43	615.973	734.812	618.733	733.953	621.159	734.088	621.289	734.972	619.172	735.994	606.272	715.961	613.73	736.993	609.404	724.068	608.47	708.674	613.931	717.246	613.062	704.926	614.343	699.163	617.211	700.101	616.43	685.733	624.798	717.468	609.994	713.654	614.039
707.343	621.014	687.993	634.504	703.119	624.263	700.787	624.872	701.624	624.951	705.714	620.827	707.256	621.013	714.137	619.074	717.683	616.001	735.122	618.249	733.893	620.358	734.628	620.968	735.652	619.063	735.516	605.807	715.496	614.144	736.607	608.909	723.625	608.897	707.849	613.865	716.435	612.969	704.785	615.021	698.94	617.823	699.664	616.812	685.251	625.175	716.997	610.454	713.039	614.308
707.075	621.509	687.64	634.994	702.771	624.741	700.266	625.174	700.877	625.032	704.937	620.828	706.482	620.932	713.34	618.983	717.13	616.199	735.691	618.023	734.476	620.073	734.998	620.478	735.912	618.521	734.791	605.602	714.753	614.307	735.982	608.771	722.948	608.998	707.025	613.803	716.142	613.463	703.982	615.021	698.241	618.027	699.25	617.203	684.918	625.702	717.032	611.268	712.749	615.002
706.655	621.904	686.971	635.054	702.372	625.155	699.879	625.631	700.154	625.038	704.173	620.945	705.707	620.866	712.541	618.904	716.984	616.837	735.939	617.453	734.859	619.625	734.966	619.717	736.299	618.099	734.015	605.617	713.977	614.353	735.822	608.124	722.305	609.128	706.199	613.747	715.704	613.948	703.149	614.945	697.416	617.941	698.905	617.679	684.345	625.997	716.711	611.835	711.938	615.101
706.064	622.055	686.212	634.981	701.904	625.515	699.481	626.052	700.067	625.747	704.039	621.607	704.93	620.828	711.743	618.886	716.322	617.1	736.418	617.162	734.965	618.973	735.256	619.198	736.881	617.87	733.272	605.84	713.199	614.344	735.318	607.848	721.927	609.613	705.374	613.697	715.037	614.22	702.396	615.041	697.095	618.459	698.398	617.986	684.074	626.572	716.255	612.261	711.031	615.016
705.323	621.971	685.499	634.972	701.601	626.038	698.68	625.999	699.427	625.975	703.566	621.901	704.205	620.998	711.149	619.122	715.552	617.103	736.944	616.796	735.039	618.28	735.707	618.807	736.975	617.157	733.07	606.481	712.421	614.318	734.921	607.444	721.486	610.038	704.547	613.677	714.223	614.259	701.923	615.458	696.646	618.857	698.081	618.487	683.534	626.945	715.819	612.687	710.123	614.924
704.581	621.905	685.033	635.35	701.078	626.325	698.015	626.214	698.652	625.981	702.868	621.957	703.985	621.585	710.986	619.795	714.76	617.029	737.354	616.206	735.601	617.897	736.073	618.372	737.662	617.04	732.665	606.888	711.644	614.282	734.631	606.9	720.686	609.959	703.721	613.686	713.406	614.237	701.672	616.024	696.172	619.217	697.624	618.853	682.763	626.983	715.393	613.13	709.325	615.076
704.159	622.278	684.731	635.831	700.755	626.866	697.824	626.862	698.136	626.229	702.165	622.022	703.643	621.992	710.34	619.995	713.97	616.944	737.495	615.423	736.396	618.022	736.548	618.052	737.92	616.516	731.993	606.999	710.867	614.237	733.851	606.856	720.171	610.285	702.902	613.765	712.591	614.184	700.841	615.965	695.91	619.796	697.233	619.274	682.197	627.253	714.977	613.565	708.869	615.595
703.798	622.694	684.194	636.008	700.132	627.018	697.206	627.014	697.927	626.855	701.96	622.678	702.874	621.951	709.571	619.971	713.179	616.873	737.49	614.625	736.857	617.668	736.956	617.578	738.302	616.072	731.23	606.966	710.091	614.18	733.065	606.925	719.766	610.72	702.253	614.056	711.776	614.117	700.118	616.119	695.25	619.976	696.854	619.727	681.801	627.736	714.535	614.094	708.428	616.029
703.421	623.036	683.494	636.015	699.421	627.089	696.452	627.07	697.234	627.078	702.001	623.432	702.113	622.003	709.148	620.317	712.387	616.9	737.359	613.845	737.258	617.27	737.011	616.865	739.011	615.947	731.087	607.594	709.315	614.122	732.279	607.013	719.364	611.128	701.903	614.629	710.962	614.044	699.9	616.732	695.074	620.618	696.31	620.049	681.312	628.089	713.675	614.028	707.572	616.045
703.077	623.444	682.982	636.343	698.923	627.462	695.922	627.404	696.434	626.992	701.691	623.862	701.998	622.658	708.849	620.864	712.092	617.437	736.98	613.264	737.73	616.923	737.194	616.281	739.806	616.051	730.6	608.001	708.54	614.06	731.493	607.09	718.958	611.549	701.463	614.994	710.148	613.969	699.411	617.071	694.527	620.944	695.496	619.953	680.996	628.632	712.81	613.939	706.95	616.366
702.691	623.802	682.729	636.817	698.685	628.077	695.751	628.056	695.626	626.941	701.204	624.148	701.999	623.416	708.199	621.139	711.692	617.867	736.423	612.89	738.276	616.481	737.692	615.923	740.597	616.055	729.911	608.17	707.764	613.997	730.722	607.104	718.538	611.95	700.671	614.942	709.334	613.894	698.946	617.441	693.772	620.997	695.114	620.411	680.454	628.945	712.209	614.231	706.734	617.084
702.316	624.171	682.305	637.163	697.873	627.988	694.937	628.043	695.137	627.26	701.06	624.748	701.792	623.977	707.399	621.093	711.04	618.007	735.942	612.562	738.405	615.693	738.243	615.503	740.92	615.558	729.128	608.148	706.988	613.934	730.04	606.881	718.138	612.37	700.167	615.289	708.52	613.829	698.709	618.041	693.189	621.2	694.685	620.845	680.104	629.452	711.79	614.738	705.849	617.258
701.967	624.568	681.959	637.579	697.234	628.183	694.118	627.955	694.86	627.824	700.437	624.982	701.056	624.044	706.601	621.008	710.263	617.949	736.028	611.768	738.345	614.901	738.268	614.696	741.315	615.166	728.346	608.083	706.213	613.872	729.897	606.231	717.724	612.781	699.762	615.72	707.704	613.776	697.968	618.139	692.912	621.773	694.052	621.01	679.635	629.842	711.231	615.031	704.937	617.257
701.564	624.908	682.036	638.336	696.859	628.665	693.367	628.051	694.219	628.026	699.704	624.985	700.286	623.999	705.803	620.922	710.073	618.575	736.104	610.973	738.001	614.286	737.84	614.183	741.9	614.926	727.566	608.001	705.437	613.812	729.38	606.008	717.319	613.19	699.331	616.102	706.888	613.743	697.9	618.913	692.296	622.036	693.355	621.071	679.214	630.282	710.462	615.056	704.025	617.215
701.21	625.297	681.763	638.875	696.438	629.085	692.923	628.474	693.412	627.958	699.194	625.207	700.032	624.505	705.006	620.877	709.578	618.921	735.928	610.316	737.463	613.882	737.28	613.827	742.357	614.315	726.785	607.921	704.661	613.757	728.618	606.008	716.928	613.619	698.949	616.597	706.074	613.764	697.233	619.089	691.469	621.961	692.989	621.56	678.801	630.731	710.003	615.483	703.114	617.152
700.845	625.677	681.296	639.182	695.622	629.074	692.669	629.013	693.104	628.459	698.944	625.753	699.693	624.944	704.265	620.961	708.887	619.006	735.496	609.865	736.959	613.59	736.906	613.361	742.485	613.525	726.004	607.854	703.884	613.707	727.964	605.828	716.498	614.088	699.056	617.417	705.346	613.94	696.92	619.619	691.121	622.438	692.544	621.98	678.323	631.113	709.648	616.131	702.204	617.074
700.446	626.024	680.997	639.602	694.805	628.975	691.856	628.967	692.68	628.872	698.364	626.014	698.979	625.01	704.045	621.589	708.244	619.092	735.053	609.613	737.048	612.79	736.931	612.55	742.496	612.727	725.221	607.814	703.107	613.664	727.985	605.052	715.681	613.996	698.653	617.883	704.97	614.515	696.535	620.073	690.679	622.863	691.794	621.979	677.977	631.624	708.811	616.247	701.295	616.992
700.119	626.42	681.065	640.345	693.985	628.904	691.126	629.105	692.003	629.003	697.609	625.958	698.212	624.988	703.54	621.917	708.045	619.693	734.762	608.967	736.794	612.207	737.015	611.741	742.382	611.942	724.439	607.855	702.33	613.633	727.954	604.295	715.215	614.308	698.238	618.286	704.573	614.935	695.95	620.321	689.996	623.007	691.241	622.23	677.451	631.953	707.942	616.255	700.385	616.911
699.737	626.82	680.795	640.941	693.288	629.085	690.915	629.705	691.256	629.002	697.176	626.282	698.044	625.583	702.838	621.971	707.475	620.027	734.131	608.614	736.293	611.845	737.099	610.932	742.069	611.293	724.101	608.377	701.552	613.625	727.542	603.968	714.843	614.855	697.836	618.719	703.87	614.972	695.822	621.02	689.283	623.061	690.843	622.69	677.099	632.458	707.073	616.213	699.475	616.836
699.205	627.03	680.151	641.036	692.885	629.56	690.441	630.048	691.037	629.624	696.851	626.773	697.61	625.933	702.234	622.125	706.742	620.066	733.36	608.441	735.901	611.41	737.142	610.121	741.447	610.979	723.71	608.817	700.775	613.645	727.04	604.193	714.319	615.348	697.313	619.05	703.273	615.171	695.004	621.002	689.029	623.653	690.353	623.042	676.632	632.846	706.205	616.149	698.564	616.779
698.483	626.955	679.469	641.092	692.551	630.024	689.963	630.406	690.51	629.872	696.291	627.045	696.899	626.001	701.948	622.684	705.952	619.984	732.566	608.368	735.948	610.607	736.993	609.41	741.059	610.562	723.127	609.006	700.002	613.707	726.985	604.924	713.531	615.572	696.511	618.969	702.876	615.639	694.218	621.074	688.47	623.976	689.538	622.951	676.213	633.284	705.338	616.075	697.652	616.756
698.114	627.369	678.939	641.34	691.742	629.963	689.954	631.22	690.122	630.325	695.514	626.951	696.145	625.984	701.417	622.948	705.163	619.905	731.768	608.355	736.048	609.809	736.567	608.907	741.058	609.853	722.351	608.928	699.267	613.922	726.253	605.014	712.717	615.692	696.088	619.394	702.447	616.054	693.933	621.625	687.694	623.967	689.12	623.376	675.797	633.728	704.471	615.997	696.752	616.816
697.753	627.791	678.795	641.955	691.062	630.169	690.065	632.038	689.992	631.009	695.156	627.363	696.057	626.661	701.138	623.452	704.372	619.9	730.972	608.409	736.114	609.008	735.973	608.693	741.138	609.057	722.072	609.484	699.038	614.511	725.482	604.953	711.898	615.767	695.705	619.917	701.636	615.95	693.501	622.029	687.184	624.278	688.718	623.852	675.339	634.13	703.604	615.917	695.964	617.125
697.257	628.031	678.132	641.995	690.843	630.768	689.968	632.81	689.967	631.717	694.777	627.821	695.53	626.909	700.706	623.878	704.07	620.458	730.185	608.531	735.937	608.319	736.043	607.911	741.031	608.342	721.633	609.834	698.665	614.905	724.698	604.857	711.076	615.818	695.048	620.093	701.138	616.306	692.682	622.024	686.795	624.738	688.102	624.047	674.973	634.614	702.737	615.844	695.931	617.987
696.524	627.947	677.442	642.064	690.344	631.108	689.355	633.029	689.379	631.976	694.2	628.079	695.114	627.271	700.063	624.068	703.644	620.818	729.475	608.804	735.516	607.876	735.855	607.244	740.509	607.863	721.247	610.218	698.123	615.121	723.919	604.821	710.254	615.845	694.225	620.026	700.746	616.744	691.855	621.944	686.326	625.085	687.286	623.968	674.467	635.032	701.869	615.78	695.07	618.028
696.133	628.336	676.929	642.35	689.961	631.534	688.977	633.475	689.103	632.496	693.423	627.986	694.936	627.879	699.266	623.984	703.249	621.197	728.974	609.284	734.994	607.648	735.423	606.84	739.716	607.982	720.945	610.696	698.037	615.803	723.162	604.954	709.431	615.848	693.403	619.935	700.361	617.159	691.069	622.063	686.008	625.601	686.497	623.93	673.633	634.962	700.999	615.742	694.163	617.937
695.782	628.782	676.815	642.975	689.989	632.329	688.705	634.031	688.638	632.848	692.645	627.923	694.24	628.016	698.467	623.923	702.927	621.672	728.906	610.006	734.829	606.926	734.954	606.51	739.202	607.723	720.426	611.024	697.391	615.93	722.95	605.633	708.608	615.829	692.579	619.873	699.946	617.559	690.953	622.773	685.504	625.927	686.029	624.383	673.138	635.346	700.13	615.758	693.279	617.998
695.312	629.074	676.222	643.136	689.823	633.037	687.987	634.137	688.236	633.251	692.181	628.262	693.477	627.972	698.113	624.408	702.428	621.966	728.13	610.042	734.134	606.63	734.727	605.831	738.815	607.282	719.672	610.975	697.101	616.408	722.969	606.384	707.786	615.793	692.063	620.305	699.554	618.037	690.349	622.987	685.139	626.394	685.677	624.836	672.703	635.781	699.368	615.985	692.978	618.629
694.57	629.007	675.908	643.578	689.106	633.151	687.944	634.915	687.915	633.748	691.817	628.722	693.102	628.353	697.694	624.83	702.13	622.438	727.336	609.984	733.348	606.511	733.954	605.627	738.339	606.954	719.208	611.271	696.807	616.904	722.737	606.868	706.966	615.728	691.736	620.833	698.763	617.969	689.545	623.019	684.705	626.797	685.257	625.227	672.285	636.207	698.874	616.494	692.463	618.998
693.83	628.923	675.63	644.056	689.03	633.806	687.254	635.046	687.358	634.121	691.322	629.006	692.827	628.876	697.084	625.006	701.707	622.847	726.542	609.906	732.548	606.513	733.152	605.625	737.557	607.038	718.854	611.73	696.096	617.019	722.169	607.079	706.149	615.629	691.144	621.004	698.206	618.243	689	623.316	684.281	627.203	684.844	625.634	671.882	636.668	698.586	617.03	691.564	618.989
693.28	629.146	674.985	644.164	688.976	634.579	686.976	635.582	686.55	634.062	690.548	628.911	692.163	629.019	696.356	625.008	701.091	623.021	725.754	609.89	731.769	606.643	732.428	605.859	737.061	606.67	718.346	612.047	695.33	616.964	722.052	607.749	705.34	615.484	690.421	621.065	697.8	618.675	688.832	623.972	683.916	627.673	684.477	626.082	671.355	637.018	697.725	616.952	691.003	619.34
692.886	629.561	674.883	644.84	688.577	635.056	686.567	636.013	685.744	633.966	690.076	629.321	691.39	628.961	696.025	625.532	700.376	623.011	724.993	610.052	731.09	607.009	731.976	606.362	736.732	606.191	717.568	611.955	695.086	617.487	721.428	607.905	704.577	615.243	689.912	621.446	697.423	619.103	688.031	623.997	683.403	628.053	683.99	626.412	670.504	636.899	697.053	617.217	690.749	619.991
692.611	630.044	674.327	645.019	687.777	635.045	685.768	636.043	684.937	633.907	689.953	629.978	691.088	629.436	695.575	625.869	700.046	623.507	724.945	610.794	731	607.727	731.822	607.019	736.344	605.805	717.173	612.339	694.697	617.876	721.078	608.38	703.946	614.807	689.666	622	696.976	619.474	687.224	624.029	682.575	627.956	683.661	626.9	669.997	637.393	696.813	617.849	690.025	620.168
691.886	629.965	673.602	645.032	687.027	635.12	684.951	635.946	684.283	634.075	689.912	630.637	690.729	629.86	695.206	626.295	699.616	623.916	724.379	610.987	730.46	607.987	731.015	607.018	735.936	605.404	716.788	612.792	694.147	618.102	721.002	609.099	703.879	614.047	689.126	622.271	696.621	619.945	686.992	624.624	682.127	628.366	683.211	627.267	670.002	638.179	696.148	617.993	689.997	621.042
691.305	630.138	672.976	645.181	686.899	635.808	684.169	636.018	683.937	634.61	689.469	630.989	690.187	630.081	694.823	626.715	698.952	623.994	723.604	610.998	730.016	608.349	730.207	606.936	735.631	604.78	716.249	613.08	694.042	618.783	720.995	609.808	703.231	613.733	688.798	622.784	696.205	620.301	686.513	624.972	681.701	628.784	682.807	627.685	669.758	638.778	695.373	618.085	690.021	621.945
690.886	630.508	672.908	645.881	686.316	636.07	684.01	636.676	683.489	634.932	689.059	631.406	690.05	630.707	694.375	627.065	698.325	624.11	722.99	611.204	729.851	608.99	729.419	606.98	734.852	604.616	715.469	613.002	693.406	618.921	720.324	609.956	702.422	613.649	688.242	623.016	695.824	620.782	685.713	625.002	681.294	629.195	682.427	628.124	669.307	639.203	694.902	618.506	689.154	621.99
690.639	630.972	672.309	646.049	685.507	636.051	683.488	636.956	683.126	635.387	689.01	632.08	689.477	630.901	694.058	627.526	697.952	624.573	722.954	611.961	729.067	609.014	728.97	607.386	734.058	604.625	714.688	612.922	693.087	619.392	720.11	610.52	701.634	613.767	687.49	623.048	695.295	621.153	685.042	625.165	680.92	629.656	681.97	628.479	668.872	639.616	694.608	619.06	689.021	622.755
690.129	631.25	671.551	646.008	684.689	635.958	682.692	636.969	682.711	635.768	688.87	632.69	689.136	631.339	693.604	627.931	697.55	625.002	722.241	612.036	728.27	608.992	728.789	608.01	733.36	604.895	714.207	613.244	693.032	620.103	719.672	610.902	701.008	614.157	686.925	623.365	694.484	621.185	684.981	625.934	680.425	630.052	681.632	629.014	668.468	640.072	693.961	619.277	688.337	623
689.98	631.802	670.799	645.944	683.874	635.888	682.047	637.16	682.265	636.151	688.436	633.084	688.832	631.819	692.917	627.99	696.812	624.966	722.013	612.591	728.016	609.531	727.994	607.993	732.906	605.411	713.832	613.718	693.042	620.832	718.976	611.01	700.963	614.926	686.734	623.97	693.669	621.123	684.215	626.003	679.597	629.951	680.869	628.976	667.989	640.447	693.823	620.005	687.451	622.991
689.976	632.484	670.087	646.056	683.123	636.05	681.946	637.936	681.917	636.68	688.053	633.461	688.216	631.98	692.298	628.131	696.249	625.194	721.988	613.355	727.65	609.989	727.199	608.023	732.756	606.035	713.376	614.092	692.358	621.04	718.225	610.961	700.216	614.968	686.158	624.212	692.856	621.038	684.015	626.636	679.131	630.348	680.25	629.187	667.617	640.939	693.111	620.155	687.059	623.483
689.689	633.008	669.953	646.692	682.967	636.715	682.005	638.739	681.999	637.486	687.654	633.851	688.042	632.612	691.912	628.59	695.852	625.626	721.812	613.976	726.891	610.045	726.973	608.604	731.961	605.964	712.596	614.012	691.606	620.995	718.056	611.614	699.42	615.001	685.835	624.708	692.044	620.95	683.514	626.969	678.717	630.773	679.836	629.623	667.163	641.327	692.877	620.808	686.603	623.973
689.206	633.243	669.534	647.013	682.452	637.017	681.407	638.944	682.072	638.293	687.28	634.243	688.05	633.349	691.511	628.97	695.491	626.04	721.077	614.032	726.092	609.944	726.557	609.009	731.244	606.098	711.815	613.937	691.157	621.265	717.536	611.886	699.007	615.418	685.426	625.12	691.231	620.872	683.043	627.333	678.303	631.182	679.497	630.088	666.751	641.805	692.253	621.014	685.752	624.025
688.863	633.659	668.78	646.995	681.982	637.372	681.057	639.42	681.747	638.817	686.906	634.658	687.791	633.881	691.119	629.381	695.076	626.401	720.991	614.733	725.302	609.977	725.776	609.029	730.898	606.573	711.262	614.177	690.911	621.814	717.153	612.294	698.744	615.972	684.921	625.44	690.416	620.823	682.826	627.951	677.899	631.611	678.986	630.384	666.124	642.009	691.443	621.057	684.846	623.949
688.513	634.067	668.047	647.035	681.809	638.025	680.746	639.941	681.307	639.218	686.478	635.094	687.128	634.071	690.718	629.781	694.708	626.875	720.44	614.994	725.041	610.52	724.971	608.937	730.574	607.021	710.874	614.633	690.283	622.031	716.867	612.802	698.046	616.092	684.694	626.039	689.612	620.845	682.047	628.007	677.48	632.02	678.702	630.956	665.39	642.089	690.935	621.441	684.124	624.137
687.773	633.984	667.977	647.726	681.017	638.05	680.075	640.101	680.913	639.613	685.701	635.019	686.358	633.965	690.317	630.182	694.1	627.021	719.677	615.026	724.648	610.931	724.189	609.012	729.792	607.001	710.501	615.09	689.52	621.961	716.248	612.975	697.987	616.844	684.06	626.234	689.031	621.249	682.027	628.825	677.06	632.431	677.993	630.993	664.907	642.515	690.67	622.036	683.91	624.845
687.216	634.191	667.511	648.004	681.004	638.83	680.023	640.862	680.484	640.012	684.924	634.938	686.105	634.488	689.92	630.587	693.417	627.071	719.05	615.167	723.912	610.997	724.009	609.637	729.093	607.13	709.72	615.037	689.154	622.338	716.074	613.585	697.304	617	683.806	626.809	688.757	621.783	681.338	628.975	676.654	632.86	677.315	631.134	664.563	643.015	689.811	621.986	683.144	624.973
686.875	634.627	666.757	647.991	680.981	639.627	679.315	641.043	680.124	640.418	684.312	635.109	685.678	634.87	689.509	630.977	692.963	627.454	719	615.891	723.13	610.987	723.526	609.943	728.908	607.744	708.94	614.965	688.84	622.846	715.585	613.893	696.513	617.019	683.322	627.155	688.326	622.161	681.03	629.503	676.242	633.27	676.866	631.539	664.054	643.371	689.024	622.103	682.24	624.928
686.569	635.088	666.004	648.001	680.54	640.008	678.515	641.006	679.715	640.908	683.896	635.543	685.037	635.011	689.121	631.389	692.656	627.976	718.296	616.13	723.042	611.693	722.754	609.969	728.406	608.079	708.341	615.128	688.221	623.117	715.189	614.264	696.042	617.344	682.884	627.547	687.878	622.534	680.651	629.959	675.828	633.705	676.596	632.06	663.69	643.864	688.91	622.862	681.951	625.661
685.83	635.08	665.993	648.75	680.014	640.298	677.698	640.96	679.081	641.113	683.575	635.969	684.287	634.962	688.717	631.789	691.96	627.993	717.517	616.169	722.473	611.917	722.07	610.107	727.617	608.106	707.939	615.56	687.447	623.041	714.961	614.827	695.828	617.962	682.587	628.078	687.591	623.05	680.061	630.2	675.311	634.036	676.031	632.3	663.219	644.25	688.223	622.968	682.016	626.546
685.09	634.999	665.484	649.002	679.865	640.965	677.103	641.19	678.272	641.046	683.136	636.318	684.062	635.549	688.32	632.185	691.327	628.136	716.72	616.112	722.094	612.341	721.955	610.854	726.819	608.024	707.626	616.122	686.674	622.951	714.417	615.327	695.068	618.15	681.958	628.277	686.979	623.281	679.949	630.914	674.504	633.969	675.765	632.884	662.805	644.692	687.386	623.007	681.487	626.901
684.349	634.923	665.013	649.289	679.109	641.025	676.946	641.858	677.466	640.95	682.772	636.722	683.598	635.854	687.935	632.597	690.891	628.539	715.926	616.031	721.831	612.892	721.994	611.642	726.022	607.927	706.863	616.205	685.9	622.9	713.667	615.542	694.248	618.082	681.779	628.923	687.014	624.049	679.19	631.002	674.037	634.397	675.116	633	662.401	645.143	686.965	623.481	681.067	627.439
683.635	634.921	664.928	649.958	679	641.731	676.242	641.993	676.657	640.895	682.384	637.119	683.207	636.229	687.533	633.059	690.606	629.056	715.131	615.944	721.126	613	721.505	611.934	725.223	607.858	706.081	616.208	685.245	623.028	712.889	615.675	693.429	617.992	681.213	629.179	686.858	624.728	678.37	630.985	673.661	634.847	674.403	633.09	661.913	645.51	686.968	624.331	681.009	628.264
683.04	635.185	664.211	649.995	678.429	641.991	675.438	641.973	676.14	641.269	681.942	637.489	682.923	636.717	686.75	632.972	689.82	628.941	714.336	615.868	721.038	613.721	721.077	612.315	724.462	607.958	705.298	616.17	685.002	623.634	712.104	615.761	692.611	617.909	680.86	629.642	686.43	625.135	678.052	631.493	673.239	635.255	673.906	633.449	661.58	646.037	686.804	625.011	680.717	628.834
682.847	635.726	663.468	650.001	677.634	642.009	675.086	642.433	675.763	641.746	682.035	638.264	682.383	636.932	686.217	633.242	689.184	629.17	713.54	615.82	720.457	613.943	720.865	612.921	723.971	608.35	704.515	616.111	684.501	623.89	711.316	615.816	691.795	617.893	680.502	630.096	685.926	625.422	677.646	631.918	672.819	635.671	673.678	634.031	661.059	646.361	685.986	625.059	680.145	629.221
682.479	636.086	663.035	650.322	677.048	642.216	674.703	642.867	675.252	642.012	681.769	638.814	682.063	637.449	685.826	633.691	688.965	629.736	712.749	615.851	720.087	614.369	720.097	612.976	723.838	608.995	703.734	616.037	684.165	624.33	710.526	615.85	691.097	618.076	679.944	630.351	685.72	626.02	677.108	632.205	672.419	636.104	673.068	634.252	660.707	646.918	685.968	625.907	679.944	629.975
681.951	636.304	662.89	650.936	676.976	642.96	674.167	643.137	674.496	641.999	681.348	639.189	682.011	638.136	685.374	634.042	688.985	630.479	712.095	616.082	719.802	614.876	720.029	613.723	723.108	609.062	702.953	615.962	683.815	624.757	709.736	615.858	691.013	618.819	679.788	631.011	685.068	626.209	676.934	632.861	671.97	636.487	672.789	634.789	659.99	646.995	685.216	626	680.047	630.881
681.823	636.91	662.195	650.996	676.175	642.996	674.014	643.802	674.002	642.384	680.914	639.518	681.892	638.741	684.578	633.937	688.709	631.103	712.004	616.807	719.157	615.021	719.453	613.959	722.966	609.716	702.172	615.889	683.301	625.008	708.946	615.845	690.34	618.968	679.126	631.171	685.006	626.902	676.22	632.948	671.601	636.954	672.306	635.148	659.307	647.157	684.363	626.004	680.027	631.73
681.273	637.12	662.027	651.586	675.366	642.979	673.321	643.937	673.678	642.859	680.621	640.017	681.353	639.024	684.089	634.317	687.921	631.012	711.369	616.948	719.066	615.719	719.071	614.377	722.468	610.019	701.39	615.821	683.012	625.552	708.157	615.814	689.554	618.977	678.862	631.724	684.913	627.623	675.897	633.618	671.156	637.322	671.958	635.603	658.861	647.616	683.998	626.503	679.32	632.003
680.972	637.543	661.631	651.945	675.04	643.466	673.088	644.535	673.247	643.238	680.166	640.307	681.086	639.52	683.742	634.77	687.274	631.159	711.083	617.445	718.457	615.928	718.795	614.911	721.979	610.335	700.608	615.765	683.021	626.278	707.368	615.768	689.094	619.324	678.399	632.096	684.543	628.095	675.849	634.423	670.767	637.797	671.995	636.387	658.429	648.038	683.621	626.99	679.053	632.627
681.003	638.268	661.077	652.15	674.698	643.952	672.607	644.886	672.838	643.644	679.817	640.797	680.63	639.852	683.348	635.166	686.879	631.586	710.729	617.878	718.115	616.385	718.069	615.03	721.86	611.024	699.824	615.739	682.78	626.791	706.581	615.693	688.811	619.863	677.966	632.479	683.964	628.322	675.917	635.259	670.187	638.017	671.75	637.034	657.598	647.971	683.025	627.258	678.439	632.93
680.864	638.904	660.995	652.853	674.065	644.14	672.141	645.25	672.476	644.091	679.311	641.129	680.249	640.239	682.903	635.523	686.555	632.051	710.154	618.088	717.823	616.939	717.268	614.985	721.091	611.055	699.042	615.769	682.299	627.113	705.8	615.578	688.173	620.028	677.996	633.282	683.801	629.011	676.011	636.093	669.361	637.904	671.126	637.213	657	648.313	682.861	627.957	678.1	633.502
680.313	639.105	661.004	653.596	674.006	644.895	671.892	645.829	671.999	644.407	678.532	641.122	679.957	640.719	682.601	636.014	685.766	631.958	710.055	618.779	717.11	617.172	717.075	615.571	720.954	611.713	698.367	615.989	682.039	627.613	705.03	615.411	688.051	620.716	677.844	633.983	683.043	628.994	676.106	636.926	668.551	637.861	670.836	637.732	656.724	648.882	682.062	628.022	677.563	633.883
679.998	639.495	660.597	653.935	673.273	644.992	671.214	645.975	671.684	644.951	677.754	641.042	679.437	641.11	682.1	636.322	685.128	632.179	709.398	618.929	716.307	617.144	716.604	615.981	720.471	612.023	697.885	616.421	681.539	627.893	704.366	615.109	687.436	620.911	677.152	634.125	682.317	629.097	676.177	637.762	667.946	638.293	670.416	638.12	656.202	649.221	681.993	628.816	677.17	634.38
680.054	640.225	660.097	654.191	672.477	644.991	671.057	646.636	670.991	644.996	676.977	640.954	678.683	641.114	681.746	636.746	684.839	632.694	709.107	619.434	715.506	617.07	715.856	616.091	720.002	612.348	697.703	616.977	681.201	628.316	703.959	614.555	687.11	621.408	676.994	634.751	681.894	629.519	676.097	638.586	667.878	639.071	669.922	638.433	655.817	649.683	681.303	628.991	676.718	634.895
679.914	640.898	660.026	654.878	672.065	645.385	670.513	646.904	670.327	645.131	676.198	640.892	677.908	641.046	681.303	637.136	684.469	633.111	708.757	619.907	714.706	616.983	715.047	616.009	719.844	612.987	697.155	617.229	680.854	628.753	703.697	613.945	686.734	621.854	676.956	635.522	681.632	630.071	675.547	638.919	667.972	639.895	669.71	639.029	655.399	650.123	681.024	629.578	675.959	635.099
679.312	641.034	659.332	654.944	671.763	645.899	670.142	647.341	669.874	645.528	675.488	640.972	677.135	640.959	680.885	637.585	683.939	633.377	708.042	620.035	713.905	616.904	714.239	615.917	719.063	613.018	696.825	617.688	680.316	629.043	703.059	613.652	686.15	622.099	676.636	636.047	680.962	630.22	675.156	639.359	667.902	640.613	669.031	639.193	654.957	650.539	680.545	629.965	675.05	635.017
678.601	641.046	659.079	655.45	671.129	646.071	669.811	647.825	669.602	646.04	674.944	641.329	676.361	640.88	680.903	638.385	683.779	634.029	707.249	619.952	713.104	616.855	713.429	615.917	718.3	613.029	696.467	618.113	679.545	628.954	702.284	613.526	685.961	622.802	675.967	636.2	680.833	630.909	674.796	639.822	667.526	641.105	669.007	639.926	654.99	651.365	680.04	630.327	674.144	634.924
677.981	641.155	658.784	655.933	671.044	646.797	669.219	648.062	669.063	646.311	674.747	641.904	675.584	640.872	680.996	639.183	683.027	633.989	707.096	620.581	712.305	616.904	713.092	616.416	718.013	613.526	695.94	618.369	679.148	629.347	701.497	613.481	686.052	623.619	676.014	637.02	680.163	630.997	674.229	640.101	666.961	641.35	668.911	640.654	654.731	651.988	679.81	630.966	673.319	634.993
677.934	641.846	658.065	656.023	670.358	646.934	669.076	648.716	668.75	646.81	674.113	641.985	675.138	641.285	681.074	639.981	682.319	634.097	706.615	621	712.069	617.514	712.713	616.882	717.683	614.043	695.742	618.947	678.764	629.75	700.708	613.5	685.518	623.899	675.936	637.779	679.415	631.066	674.071	640.743	666.734	641.959	668.509	641.093	654.06	652.214	679.043	631.07	672.978	635.626
677.393	642.048	657.313	655.97	670.077	647.481	668.444	649.025	668.314	647.187	673.427	642.067	674.76	641.718	680.918	640.643	681.886	634.488	705.892	621.152	711.618	617.893	712.023	617.012	716.905	614.164	695.221	619.197	678.344	630.092	699.928	613.617	685.104	624.345	675.381	638.053	678.923	631.415	673.411	641.077	666.164	642.223	667.944	641.345	653.913	652.937	679.01	631.905	672.431	636.019
676.966	642.367	657.084	656.485	669.677	647.914	667.667	649.031	667.878	647.566	672.921	642.388	674.367	642.071	680.487	641.095	681.675	635.05	705.095	621.114	710.933	617.996	711.224	616.957	716.105	614.122	694.863	619.614	678.051	630.556	699.287	613.964	685.005	625.068	675.009	638.468	678.743	632.026	672.61	641.081	665.821	642.72	667.806	642.039	653.975	653.792	678.229	631.989	671.542	635.938
676.886	643.034	656.736	656.917	669.111	648.174	666.846	648.952	667.564	648.066	672.738	642.959	674.036	642.526	679.903	641.343	681.008	635.184	704.3	621.032	710.231	618.044	711.069	617.621	715.307	614.044	694.55	620.082	677.594	630.932	698.899	614.485	684.979	625.792	675.036	639.276	678.035	632.137	671.776	640.988	665.408	643.14	667.119	642.171	654.067	654.647	678.02	632.643	671.084	636.43
676.15	643.006	656.031	657.004	668.997	648.873	666.208	649.109	667.033	648.33	672.157	643.191	673.604	642.867	679.896	642.14	680.998	635.912	703.506	620.946	710.043	618.673	710.539	617.975	714.509	613.961	693.972	620.289	676.925	630.99	698.691	615.031	684.297	625.969	674.906	640.012	677.997	632.878	670.943	640.922	664.919	643.492	666.867	642.75	654.033	655.457	677.48	632.966	670.606	636.857
675.422	643.018	655.279	656.956	668.281	649.09	665.972	649.737	666.75	648.893	671.987	643.761	673.226	643.264	679.964	642.938	680.915	636.634	702.711	620.876	709.482	618.955	709.808	618.048	713.71	613.891	693.774	620.884	676.312	631.109	698.045	615.18	684.084	626.575	674.097	640.043	677.932	633.623	670.243	641.056	664.634	644.068	666.353	643.018	653.671	656.078	677.055	633.398	670.177	637.33
674.973	643.316	655.073	657.516	667.478	649.061	665.367	650.009	666.112	649.013	671.958	644.478	672.855	643.666	680.054	643.736	680.549	637.086	701.915	620.856	708.75	618.987	709	617.978	712.912	613.863	693.288	621.178	675.952	631.572	697.859	615.779	683.568	626.887	673.306	640.032	677.537	634.047	669.989	641.689	663.806	643.968	665.573	643.029	652.933	656.205	676.723	633.933	669.721	637.785
674.927	644.008	654.676	657.88	666.66	648.97	664.574	649.966	665.41	649.094	671.705	645.054	672.433	644.012	680.128	644.534	679.969	637.278	701.215	620.994	708.207	619.204	708.253	618.003	712.122	613.958	692.892	621.582	675.546	631.921	697.395	616.104	683.16	627.3	673.005	640.533	676.983	634.299	669.418	641.99	663.139	644.189	664.932	643.26	652.995	657.051	675.92	634.009	669.269	638.231
674.2	643.993	654.12	658.091	665.846	648.923	664.154	650.351	664.913	649.449	671.094	645.217	672.041	644.44	680.142	645.325	680.016	638.061	701.024	621.658	707.931	619.744	708.086	618.628	712.02	614.666	692.58	622.069	675.176	632.324	696.927	616.427	682.854	627.824	672.644	640.991	677.011	635.106	668.625	641.965	662.824	644.717	664.839	643.963	652.859	657.796	675.114	634.032	668.835	638.719
673.47	644.001	653.971	658.772	665.169	649.081	663.769	650.839	664.706	650.055	670.833	645.744	672.042	645.136	679.807	645.951	679.901	638.777	700.483	621.938	707.356	620.037	707.545	619.058	711.514	614.998	691.801	621.989	674.794	632.717	696.75	617.044	682.197	628.033	671.834	640.998	676.93	635.849	668.163	642.329	662.406	645.127	664.195	644.127	652.281	658.109	675.021	634.801	668.224	639.031
672.997	644.274	654.032	659.525	665.042	649.773	663.123	651.062	663.903	649.981	670.425	646.123	671.868	645.747	679.25	646.197	679.412	639.092	699.764	621.972	706.569	619.972	706.811	619.217	710.757	615.032	691.184	622.181	674.4	633.095	696.078	617.166	681.38	627.951	671.042	641.006	676.311	636.047	667.763	642.806	661.904	645.457	663.906	644.643	651.764	658.563	674.313	634.953	667.403	639.03
672.964	644.982	653.658	659.88	664.373	649.97	662.304	650.965	663.25	650.156	669.923	646.404	671.343	646.078	678.875	646.62	678.987	639.43	699.198	622.174	706.186	620.347	705.998	619.213	709.961	614.962	690.87	622.676	674.029	633.484	695.865	617.75	681.085	628.493	671.024	641.809	675.997	636.526	667.131	643.023	661.68	646.05	663.506	645.058	651.604	659.383	674.073	635.569	666.939	639.535
672.257	645.015	653.121	660.137	663.59	649.964	661.482	650.918	662.869	650.609	669.76	647.024	670.573	645.972	678.556	647.105	679.013	640.205	698.921	622.729	705.818	620.849	705.186	619.166	709.169	614.978	690.477	623.094	673.64	633.906	695.434	618.11	680.623	628.856	670.37	641.98	676	637.324	666.34	642.981	661.026	646.22	662.976	645.34	651.683	660.222	673.557	635.953	666.519	640.006
672	645.496	652.915	660.795	663.134	650.309	661.101	651.407	662.498	651.026	669.157	647.189	670.127	646.331	677.997	647.307	678.893	640.927	698.358	622.952	705.208	621.18	704.375	619.097	709.05	615.635	689.703	623.128	672.996	633.969	694.932	618.395	680.188	629.235	670.025	642.458	675.861	638.01	666.05	643.561	660.819	646.825	663.013	646.15	652.024	660.964	672.736	636.001	666.054	640.431
671.736	645.968	653.006	661.552	662.804	650.816	660.67	651.81	661.705	650.975	668.863	647.663	669.752	646.738	677.812	647.969	678.27	641.093	698.101	623.491	704.404	621.173	703.565	619.022	708.556	616.06	688.923	623.049	672.332	634.06	694.791	619.047	679.896	629.759	669.711	642.97	675.066	638.031	665.543	643.938	660.269	647.127	662.911	646.886	652.86	660.983	672.125	636.207	665.627	640.976
671.036	646.011	653.062	662.313	662.214	651.045	660.242	652.192	661.065	651.198	668.517	648.086	669.38	647.135	677.137	648.202	677.935	641.543	697.656	623.837	703.601	621.108	702.756	618.944	707.82	616.235	688.143	622.959	671.897	634.52	694.013	618.995	679.295	629.967	668.924	643.012	674.962	638.746	664.803	643.979	659.944	647.638	662.279	647.073	652.991	661.707	671.922	636.867	664.811	640.982
670.307	646.01	652.843	662.842	662.043	651.706	659.918	652.69	660.831	651.771	667.957	648.302	668.971	647.505	676.344	648.259	677.642	642.038	697.225	624.194	702.801	621.027	701.946	618.869	707.018	616.239	687.362	622.89	672.008	635.29	693.294	619.092	679.076	630.566	668.103	642.971	674.435	639.035	664.222	644.211	659.993	648.467	661.944	647.559	653.565	661.999	671.145	637.015	664.182	641.264
670.022	646.458	652.215	663.006	661.433	651.922	659.379	652.945	660.374	652.125	667.81	648.936	668.603	647.92	675.542	648.239	676.988	642.169	696.953	624.711	702	620.942	701.135	618.804	706.217	616.195	686.61	622.923	671.743	635.801	692.906	619.511	678.567	630.857	668.031	643.721	673.982	639.393	663.84	644.699	660.059	649.281	661.609	648.053	654.405	662.003	670.287	636.958	663.759	641.795
669.772	646.946	652.019	663.617	661.111	652.425	659.031	653.489	659.907	652.478	667.241	649.15	668.213	648.293	674.741	648.191	676.913	642.879	696.394	624.951	701.199	620.868	700.323	618.753	705.417	616.134	685.937	623.176	671.32	636.176	692.657	620.024	678.142	631.286	667.447	643.981	673.767	639.982	663.359	645.042	659.846	649.994	660.95	648.221	654.961	662.281	670.069	637.605	663.109	642.01
669.085	647.006	652.029	664.34	660.714	652.841	659.026	654.244	659.67	653.058	666.889	649.587	667.831	648.71	673.941	648.124	676.307	643.059	696.128	625.463	700.397	620.815	699.511	618.736	704.617	616.066	685.855	623.873	670.98	636.597	691.88	619.971	677.984	631.961	666.655	643.996	672.985	640.006	663.037	645.564	659.167	650.144	660.896	648.984	655.161	662.941	669.498	637.903	662.349	642.12
668.354	646.999	651.792	664.831	660.185	653.131	658.768	654.788	659.015	653.22	666.601	650.084	667.374	649.053	673.142	648.048	675.962	643.503	695.691	625.86	699.595	620.851	698.708	618.814	703.819	615.993	685.262	624	671.098	637.366	691.166	620.099	677.99	632.698	666.09	644.218	672.205	640.039	662.536	645.897	658.885	650.703	660.193	649.093	655.954	663.014	669.111	638.387	661.864	642.594
668.045	647.42	651.222	665.046	659.969	653.781	658.298	655.165	658.819	653.834	665.987	650.237	666.602	648.953	672.343	647.972	675.694	644.025	695.045	626.011	699.136	621.288	698.173	619.198	703.02	615.919	684.516	624.025	670.753	637.927	690.906	620.632	677.399	632.95	665.939	644.901	671.988	640.625	662.162	646.361	658.445	651.103	659.935	649.646	656.804	662.987	668.72	638.874	661.403	643.014
667.807	647.922	651.006	665.642	660.043	654.596	657.957	655.629	658.328	654.14	665.84	650.9	666.141	649.303	671.544	647.899	674.981	644.104	694.322	625.998	698.748	621.748	697.802	619.695	702.221	615.849	683.926	624.277	670.116	638.039	690.555	621.058	677.047	633.475	665.207	645.093	671.531	640.974	661.739	646.762	657.928	651.421	659.49	650.003	656.97	663.667	668.149	639.176	660.533	642.955
667.135	648.001	651.038	666.373	659.527	654.9	657.464	655.968	657.907	654.515	665.231	651.117	665.782	649.763	670.744	647.831	674.949	644.869	694.035	626.556	698.223	621.988	697.378	620.03	701.421	615.783	683.853	624.979	669.44	638.089	689.993	621.267	677.025	634.214	664.392	645.031	670.75	641.003	661.271	647.139	657.717	652.04	658.703	650.019	657.54	663.996	667.948	639.845	659.895	643.38
666.405	647.988	650.76	666.835	659.161	655.35	657.124	656.433	657.644	655.055	664.459	651.115	665.297	650.045	669.943	647.783	674.331	645.046	693.563	626.875	697.438	621.922	697.043	620.521	700.62	615.737	683.224	625.123	668.942	638.403	690.049	622.041	676.797	634.769	663.57	644.936	670.047	641.109	660.962	647.708	656.895	651.98	658.001	650.143	658.354	664.004	667.209	640.036	660.003	644.285
666.067	648.382	650.238	667.105	658.792	655.796	656.684	656.861	656.982	655.202	663.681	651.036	664.551	649.986	669.14	647.782	673.956	645.461	693.195	627.302	697.014	622.418	696.584	620.875	699.819	615.721	682.913	625.581	668.697	638.923	689.939	622.761	676.289	635.121	662.752	644.911	669.993	641.859	661.061	648.54	656.144	652.113	657.938	650.886	659.204	663.948	666.348	639.956	659.721	644.934
665.836	648.891	650.044	667.671	658.262	656.092	656.032	657.013	656.832	655.871	662.904	650.943	664.086	650.329	668.409	647.961	673.722	646.02	692.821	627.73	697.016	623.151	696.202	621.306	699.021	615.757	682.604	626.044	668.221	639.225	689.401	623.023	675.953	635.649	662.135	645.153	669.306	641.985	660.562	648.922	655.888	652.692	657.243	650.989	659.875	664.142	666.08	640.555	659.091	645.247
665.187	648.977	649.504	667.887	658.049	656.685	655.338	657.076	656.289	656.142	662.125	650.882	663.765	650.833	667.948	648.402	672.955	646.067	692.343	628.051	696.822	623.762	695.806	621.721	698.235	615.892	681.976	626.197	667.846	639.627	688.648	623.049	676.058	636.466	661.954	645.809	669.03	642.523	660.169	649.36	655.457	653.08	656.465	651.024	660.029	664.841	665.55	640.931	659.017	646.003
665.066	649.584	649.127	668.305	657.453	656.981	654.952	657.565	655.9	656.579	661.4	650.995	663.227	651.085	667.788	649.022	672.166	645.964	692.051	628.558	696.268	624.051	695.354	622.078	698.031	616.555	682.009	626.972	667.531	640.085	687.99	623.169	675.623	636.867	661.291	645.946	668.67	642.984	659.746	649.769	654.95	653.395	656	651.376	660.775	664.939	664.759	640.983	658.843	646.756
664.649	649.93	648.979	668.937	656.687	656.973	654.52	657.94	655.562	657.045	660.929	651.385	662.453	651.046	666.996	649.036	671.395	646	691.571	628.873	695.494	623.986	695.026	622.56	697.564	616.866	681.937	627.687	666.992	640.318	687.93	623.886	675.174	637.285	661.089	646.557	667.87	643.001	659.317	650.171	654.758	654.025	655.806	651.991	660.951	665.647	664.157	641.21	658.325	647.175
663.97	650.017	649.065	669.695	656.177	657.263	654.134	658.382	654.764	656.979	660.815	652.044	661.681	650.947	666.199	648.958	670.993	646.411	691.202	629.298	695.061	624.398	694.558	622.901	697.176	617.252	681.511	628.046	666.757	640.863	687.269	623.989	674.987	637.901	660.59	646.879	667.06	642.966	658.941	650.623	654.023	654.117	655.018	652.023	661.541	665.906	663.856	641.803	657.86	647.617
663.236	649.971	648.494	669.92	655.818	657.753	653.709	658.78	654.051	657.15	660.037	651.974	660.906	650.891	665.446	649.006	670.773	646.973	690.835	629.723	694.681	624.822	694.179	623.331	696.886	617.762	680.973	628.285	666.322	641.182	686.517	624.024	674.967	638.624	660.152	647.267	667.021	643.751	658.48	651.069	653.909	654.833	654.989	652.817	662.108	666.349	663.222	642.032	657.447	648.122
663.081	650.543	648.153	670.355	655.296	658.046	653.286	659.187	653.854	657.754	659.302	652.05	660.283	651.108	664.979	649.374	670.019	646.996	690.357	630.04	694.288	625.221	693.776	623.741	696.29	617.945	680.916	629.016	665.913	641.545	685.994	624.298	674.473	638.993	659.871	647.815	666.426	643.974	657.649	650.958	653.312	655.073	654.374	653.022	662.414	667.108	663.035	642.715	656.902	648.489
662.682	650.905	647.813	670.777	655.042	658.619	652.885	659.612	653.397	658.096	658.926	652.48	659.862	651.53	664.828	650.028	669.244	647.016	690.058	630.533	693.888	625.633	693.351	624.127	696.017	618.55	680.178	629.07	665.638	642.085	685.899	624.982	674.04	639.422	659.217	647.991	666.043	644.398	657.159	651.317	652.935	655.532	653.987	653.454	662.495	667.959	662.391	642.935	656.577	649.077
662.018	651.007	647.278	671.006	654.505	658.897	652.452	659.936	652.965	658.464	658.716	653.049	659.614	652.034	664.037	650.088	669.002	647.559	689.598	630.872	693.469	626.057	693.003	624.577	696.02	619.298	679.932	629.612	664.866	642.093	685.174	625.043	674.03	640.152	659.06	648.664	665.772	644.959	656.752	651.787	652.616	656.052	653.714	653.995	662.447	668.815	662.097	643.502	655.943	649.353
661.283	650.96	646.899	671.511	654.152	659.364	651.825	660.356	652.963	659.25	657.999	653.115	659.074	652.284	663.24	650.015	668.624	647.968	689.225	631.283	692.671	625.949	692.538	624.993	695.768	619.807	679.591	630.054	664.095	642.012	684.98	625.633	673.814	640.75	658.475	648.91	665.031	645.109	656.166	652.012	651.963	656.234	653.032	654.124	662.219	669.636	661.605	643.865	655.719	650.037
661.089	651.502	647.247	671.856	653.754	659.766	651.551	661.083	652.855	659.955	658.032	653.851	658.785	652.772	662.443	649.929	667.873	648.005	688.857	631.726	692.15	626.275	691.792	624.992	695.242	620.115	678.978	630.217	663.322	641.928	684.564	626.001	673.371	641.159	658.122	649.386	664.218	645.024	655.42	652.029	651.978	657.052	652.967	654.899	661.543	669.934	661.168	644.288	655.016	650.248
660.705	651.857	647.683	672.204	653.241	660.079	651.44	661.898	652.169	660.089	657.974	654.588	658.386	653.147	661.655	649.93	667.094	648.005	688.342	632.065	691.774	626.706	691.252	625.233	694.959	620.686	678.909	630.922	662.587	641.946	684.009	626.231	672.97	641.549	657.754	649.847	663.406	644.929	654.961	652.476	651.933	657.853	652.967	655.697	661.091	670.402	660.809	644.787	654.776	650.898
660.181	652.072	647.951	672.642	652.853	660.66	651.419	662.72	651.721	660.615	657.602	655.022	657.917	653.448	660.997	650.156	667.009	648.702	687.549	631.962	691.383	627.114	690.867	625.703	695.05	621.482	678.276	631.062	661.968	642.22	683.981	626.989	672.571	642.052	657.192	650.112	662.604	644.927	654.604	652.931	651.315	658.064	652.468	655.995	661.006	671.13	660.231	645.072	654.141	651.184
660.053	652.698	648.391	673.198	652.908	661.481	651.481	663.541	651.507	661.383	656.849	655.03	657.701	653.998	660.958	650.906	666.482	648.976	687.156	632.36	690.937	627.507	690.381	626.103	694.626	621.871	677.968	631.533	661.814	642.823	683.207	627.003	671.787	641.997	657.038	650.769	662.102	645.264	654.147	653.313	650.8	658.498	651.879	656.333	661.085	671.987	659.955	645.739	653.972	651.891
659.508	652.89	649.076	673.46	652.998	662.299	651.65	664.345	651.427	662.188	656.104	655.063	657.162	654.234	660.259	650.979	665.728	649.011	686.759	632.826	691.039	628.304	689.571	626.053	694.21	622.272	677.665	632.003	661.343	643.129	682.99	627.57	671.244	642.242	656.384	650.988	661.879	645.864	653.756	653.744	650.608	659.276	651.547	657.047	660.952	672.702	660.062	646.602	653.866	652.686
659.115	653.265	649.824	673.606	653.062	663.119	652.144	664.925	651.428	662.999	655.948	655.682	656.829	654.683	659.486	651.006	665.079	649.124	686.191	633.103	690.742	628.857	688.763	625.957	693.879	622.736	676.895	631.99	660.905	643.472	682.632	628.017	670.853	642.722	655.599	650.975	661.16	645.96	653.318	654.157	650.647	660.096	651.433	657.86	660.39	673.086	659.49	646.905	653.342	653.1
658.98	653.909	650.583	673.691	652.865	663.744	652.724	665.198	651.527	663.804	655.521	656.03	656.48	655.113	659.012	651.338	665.017	649.835	685.396	633.051	690.291	629.216	687.954	625.892	693.332	622.996	676.159	632.038	660.695	644.036	681.869	628.054	670.372	643.152	655.137	651.32	661.049	646.674	652.951	654.638	650.919	660.859	651.417	658.68	660.026	673.549	659.084	647.419	652.741	653.543
659.063	654.649	651.346	673.737	652.321	664.097	653.121	665.623	651.789	664.55	654.995	656.28	655.966	655.375	658.842	651.964	664.362	650.094	684.603	632.953	689.869	629.582	687.305	626.083	693.113	623.535	675.984	632.64	660.041	644.191	681.085	627.951	669.555	643.199	654.786	651.807	660.487	646.931	653.023	655.446	651.68	660.965	651.481	659.496	659.533	673.923	659.02	648.18	652.488	654.404
658.56	654.901	652.11	673.752	651.808	664.518	653.464	666.114	652.336	664.936	654.927	656.985	655.742	655.97	658.106	652.024	663.599	650.141	683.808	632.905	689.544	630.062	686.881	626.559	692.63	623.932	675.577	633.012	659.99	644.856	680.308	627.982	668.734	643.146	654.236	652.07	660.094	647.351	652.653	655.977	651.906	661.555	651.675	660.282	659.136	674.391	658.799	648.78	652.411	655.312
658.165	655.263	652.874	673.749	652.342	664.917	654.006	666.361	652.898	665.197	654.205	657.038	655.07	655.999	657.999	652.713	662.806	650.084	683.244	633.176	689.034	630.354	686.547	626.99	691.946	624.055	674.968	633.21	659.929	645.559	680.02	628.489	667.915	643.071	654.032	652.691	659.806	647.872	652.13	656.291	652.369	661.986	652.104	660.841	658.687	674.786	658.257	649.146	652.437	656.224
657.95	655.79	653.638	673.722	652.795	665.3	654.203	667.07	653.011	665.884	653.983	657.594	654.39	656.089	657.469	652.98	662.015	650.002	682.85	633.643	688.718	630.849	686.089	627.36	691.149	623.972	674.825	633.958	659.626	646.068	679.7	628.95	667.096	642.988	653.445	652.903	659.165	648.035	651.77	656.733	653.153	662.078	652.736	661.093	658.228	675.208	657.975	649.757	652.582	657.12
657.351	655.945	654.401	673.666	653.199	665.72	654.914	667.394	653.74	665.98	653.616	658.007	653.899	656.422	657.032	653.342	661.225	649.915	682.442	634.039	688.287	631.214	685.714	627.776	690.367	623.92	674.863	634.74	658.959	646.189	678.966	628.994	666.277	642.904	653.086	653.409	659.052	648.722	651.284	657.119	653.982	661.99	652.934	661.667	657.972	675.827	658.083	650.618	652.987	657.915
657.118	656.451	655.159	673.568	653.593	666.14	655.715	667.557	653.94	666.568	652.986	658.16	653.73	656.996	656.861	653.971	660.433	649.853	681.649	633.95	687.877	631.622	685.275	628.173	690.072	624.48	674.934	635.521	659.014	646.943	678.186	628.985	665.458	642.827	653.004	654.133	658.436	648.915	650.743	657.547	654.813	661.945	653.522	661.918	657.976	676.605	657.49	650.957	653.819	658.004
656.767	656.862	655.907	673.421	653.991	666.519	656.535	667.63	654.349	667.107	652.977	658.933	653.131	657.195	656.073	653.987	659.648	649.89	681.161	634.292	687.492	632.067	684.929	628.672	689.63	624.88	675.02	636.301	658.927	647.644	678.028	629.613	664.636	642.771	652.866	654.767	658.107	649.405	650.573	658.355	654.923	662.66	653.844	662.404	657.466	676.987	657.127	651.44	653.992	658.736
656.155	657.03	656.563	673.144	654.368	667.096	657.36	667.653	655.038	667.432	652.306	659.03	652.964	657.779	656.006	654.724	659.121	650.207	680.775	634.732	686.693	631.97	684.995	629.481	688.979	624.991	675.103	637.081	658.561	648.085	677.575	629.941	663.814	642.785	652.301	655.048	657.748	649.87	650.643	659.187	655.486	663.069	654.244	662.867	657.014	677.446	656.657	651.864	654.664	659.001
655.415	656.953	657.047	672.67	655.14	667.229	658.185	667.634	655.839	667.551	651.798	659.448	652.919	658.484	655.471	654.988	658.937	650.824	680.27	634.995	686.143	632.254	685.081	630.288	688.315	625.072	675.158	637.862	657.958	648.252	677.087	630.232	663.162	643.129	652.057	655.609	657.153	650.1	651.039	659.858	656.261	663.211	654.91	663.077	657.032	678.235	655.942	651.964	655.544	659.014
655.113	657.4	657.199	672.019	655.959	667.239	659.007	667.567	656.649	667.575	651.515	660.147	652.684	659.035	655.03	655.345	658.287	650.984	679.505	634.94	685.81	632.763	684.757	630.844	687.968	625.582	675.058	638.627	657.847	648.927	676.955	630.884	662.8	643.634	651.521	655.894	657.03	650.799	651.679	660.106	657.094	663.206	655.725	662.986	656.736	678.792	655.241	652.119	655.959	659.479
654.768	657.813	657.778	671.684	656.781	667.198	659.82	667.435	657.457	667.513	651.386	660.917	651.992	659.16	654.836	655.946	657.518	650.967	678.985	635.351	685.312	633.067	684.302	631.222	687.522	625.92	674.579	638.969	657.272	649.129	676.264	630.951	662.475	644.082	651.159	656.358	656.36	650.946	652.071	660.55	657.927	663.158	656.541	662.929	656.241	679.21	654.925	652.757	656.396	659.999
654.244	658.025	658.516	671.511	657.602	667.134	660.582	667.162	658.241	667.337	651.339	661.697	651.656	659.78	654.11	656.006	657.118	651.347	678.979	636.081	684.513	633.012	683.876	631.598	687.159	626.36	674.081	639.238	656.911	649.554	675.914	631.528	661.946	644.398	650.756	656.77	656.085	651.481	652.398	661.068	658.759	663.09	656.888	663.427	655.95	679.784	654.984	653.567	657.254	660.088
654.061	658.593	659.274	671.413	658.422	667.058	661.016	666.629	658.793	666.921	651.345	662.479	651.489	660.53	653.998	656.719	656.801	651.821	678.819	636.689	683.713	632.922	683.53	632.073	686.751	626.754	674.054	639.951	656.632	650.045	675.805	632.275	662.026	645.212	650.268	657.111	655.675	651.877	653.034	661.267	659.59	663.008	657.322	663.856	655.945	680.554	654.508	653.975	658.162	659.996
653.598	658.855	660.036	671.367	659.241	666.975	661.199	665.95	659.105	666.326	651.408	663.257	651.427	661.304	653.988	657.492	656.224	652.017	678.42	637.11	683.12	633.212	683.06	632.371	686.328	627.129	674.026	640.713	655.862	649.974	675.843	633.064	661.806	645.858	649.95	657.677	655.166	652.169	653.125	662.037	660.421	662.929	657.977	664.013	655.511	680.961	654.019	654.411	659.067	659.922
653.16	659.182	660.8	671.357	660.06	666.896	661.928	665.637	659.576	665.968	651.552	664.02	651.436	662.081	653.664	657.938	656.06	652.649	677.946	637.46	682.823	633.746	682.735	632.935	685.988	627.589	673.48	641.007	655.159	650.102	675.918	633.851	661.297	646.169	650.059	658.497	654.997	652.8	653.928	662.068	661.252	662.852	658.693	664.047	654.842	681.336	654.018	655.196	659.874	660.046
652.91	659.756	661.563	671.381	660.88	666.824	662.748	665.559	660.376	666.034	651.833	664.739	651.541	662.851	653.063	658.149	655.513	652.877	678.033	638.253	682.338	634.05	682.078	633.125	685.525	627.924	672.744	641.046	654.892	650.621	676.006	634.636	660.887	646.564	649.599	658.886	654.316	652.938	654.76	661.987	662.084	662.787	658.953	664.617	654.524	682.09	653.75	655.779	659.949	660.862
652.995	660.496	662.324	671.446	661.702	666.768	663.57	665.577	660.801	665.675	652.492	664.955	651.804	663.555	652.863	658.873	655.11	653.306	677.765	638.807	681.539	634.003	681.27	633.091	685.158	628.356	672.125	641.135	654.565	651.067	676.087	635.423	660.58	647.073	649.182	659.314	654.089	653.535	655.565	662.018	662.918	662.744	659.478	665.011	654.355	682.929	653.237	656.196	660.776	661.085
653.048	661.237	663.077	671.576	662.524	666.745	664.367	665.734	661.165	665.123	652.839	665.389	652.306	663.966	652.926	659.671	654.975	653.99	677.307	639.181	680.74	633.913	680.462	632.997	684.757	628.754	672.043	641.801	653.959	651.238	676.15	636.21	659.966	647.278	648.783	659.712	653.613	653.882	656.064	662.4	663.752	662.738	660.223	665.064	654.258	683.783	652.908	656.764	661.676	661.013
652.859	661.772	663.728	671.922	663.346	666.783	664.899	666.167	661.699	664.647	653.187	665.81	652.969	664.078	653.008	660.469	655.025	654.738	676.973	639.63	680.115	634.177	679.655	632.897	684.339	629.136	671.406	642.104	654.01	652.004	676.169	636.997	659.789	647.923	648.283	660.035	653.148	654.24	656.257	663.04	664.576	662.849	661.039	664.981	654.203	684.642	652.983	657.631	662.584	660.913
652.318	661.997	664.022	672.482	663.939	667.211	665.103	666.828	662.491	664.48	653.739	666.065	652.993	664.831	653.054	661.268	654.407	654.899	677.031	640.403	679.844	634.732	678.844	632.856	683.974	629.571	670.661	642.183	653.93	652.732	676.094	637.779	659.215	648.174	647.698	660.498	652.907	654.819	657.072	663.102	664.936	663.42	661.854	664.903	654.181	685.502	653.039	658.471	663.492	660.905
652.043	662.506	664.257	672.997	664.222	667.748	665.777	666.955	663.301	664.427	653.906	666.635	653.611	664.992	652.881	661.893	654.003	655.414	676.707	640.943	679.356	635.008	678.199	633.138	683.532	629.939	669.878	642.144	653.485	653.084	675.434	637.952	658.862	648.648	647.468	661.288	652.243	654.969	657.906	663.014	665.366	663.827	662.63	664.932	654.194	686.362	652.615	658.981	663.923	661.423
652.014	663.178	664.961	673.059	664.632	668.138	665.95	667.62	664.111	664.45	654.389	667.12	653.971	665.402	652.145	661.963	653.869	656.121	676.213	641.246	678.596	635.008	677.824	633.624	683.184	630.366	669.096	642.072	652.939	653.31	675.116	638.42	658.49	649.103	647.342	662.102	652.063	655.601	658.741	662.928	665.795	664.208	662.982	665.495	654.253	687.221	651.931	659.278	664.389	661.88
651.873	663.736	665.033	673.744	665.106	668.49	666.477	667.89	664.909	664.567	655.056	667.414	654.202	665.946	651.75	662.605	653.929	656.913	675.831	641.66	677.953	635.228	677.504	634.09	682.779	630.807	668.316	641.986	652.872	654.019	675.049	639.105	657.932	649.372	647.282	662.925	651.551	655.881	659.54	662.987	666.119	664.722	663.409	665.86	654.356	688.074	651.726	660.004	664.879	662.298
651.359	663.982	665.525	674.011	665.383	669.023	666.965	668.296	665.607	664.863	655.824	667.541	654.916	666.042	651.613	663.365	654.018	657.703	675.474	642.106	677.813	635.876	676.942	634.349	682.206	631.078	667.536	641.908	652.188	654.103	674.984	639.806	657.762	650.029	647.272	663.751	651.109	656.283	660.011	663.395	666.676	664.94	663.807	666.284	654.531	688.914	651.998	660.718	665.246	662.842
651.057	664.467	665.996	674.298	666.032	669.26	667.19	669.01	666.098	665.388	656.603	667.593	655.68	666.014	651.682	664.149	654.1	658.494	674.96	642.39	677.239	636.133	676.741	634.942	681.409	631.005	666.754	641.849	651.993	654.654	674.339	640.07	657.119	650.201	647.309	664.576	650.954	656.981	660.241	664	667.238	665.466	664.209	666.691	654.883	689.667	652.547	661.123	665.92	663.118
651.015	665.125	666.063	674.989	666.063	670.023	667.175	669.835	666.297	665.942	657.384	667.58	655.958	666.488	651.994	664.782	654.108	659.285	674.701	642.927	676.964	636.637	676.194	635.203	680.612	630.925	665.972	641.837	651.971	655.399	673.571	640.002	656.845	650.749	647.399	665.397	650.995	657.752	661.05	664.085	667.478	666.229	664.678	667.034	655.47	690.104	653.034	661.474	666.385	663.823
650.899	665.711	666.806	675.005	665.98	670.841	667.107	670.658	666.849	666.223	658.163	667.52	656.261	667.047	652.659	665.017	653.797	659.802	674.204	643.228	676.964	637.4	675.841	635.644	680.161	631.309	665.211	641.92	651.805	656.036	673.164	640.338	656.326	650.994	647.6	666.196	650.377	657.909	661.883	663.988	667.57	667.055	665.272	667.458	656.02	690.369	653.341	662.105	666.545	664.718
650.403	666	667.054	675.564	666.058	671.567	667.019	671.479	667.184	666.674	658.931	667.393	656.915	667.372	652.895	665.53	653.276	660.126	673.833	643.644	676.765	638.043	675.449	636.075	679.773	631.782	665.046	642.586	651.098	656.094	672.832	640.828	655.553	651.003	648.041	666.838	649.836	658.402	662.717	663.902	667.573	667.887	665.472	668.248	655.949	691.218	654.189	662.252	666.58	665.629
650.12	666.441	667.057	676.317	666.442	672.075	666.931	672.3	667.581	667.084	659.619	667.143	657.69	667.402	653.372	665.867	652.945	660.628	673.488	644.09	676.063	638.16	674.889	636.388	679.242	632.062	664.564	642.905	651.002	656.741	672.225	641.093	654.945	651.291	648.59	667.182	649.518	659.106	663.532	663.944	667.488	668.713	665.559	669.06	656.122	692.004	655.059	662.246	666.512	666.538
649.727	666.785	666.978	677.076	667.096	672.275	666.859	673.122	668.114	667.424	659.963	666.576	658.446	667.257	653.757	666.263	653.022	661.418	672.946	644.361	675.949	638.831	674.864	637.198	678.445	631.978	663.885	642.984	650.97	657.485	671.44	641.011	654.988	652.098	649.038	667.531	649.373	659.908	663.973	664.377	667.281	669.511	665.561	669.878	656.852	692.128	655.927	662.197	666.309	667.424
649.322	667.124	666.983	677.835	667.105	673.093	666.83	673.945	668.2	668.224	660.287	665.992	658.877	666.793	654.059	666.778	652.654	661.826	673.028	645.152	676.014	639.628	674.938	638.008	677.647	631.898	663.224	643.062	650.723	658.034	670.654	640.953	654.873	652.829	649.323	668.189	649.303	660.722	664.208	664.972	666.697	669.979	665.481	670.692	657.105	692.722	656.795	662.126	665.699	667.915
649.021	667.562	667.587	677.982	667.036	673.912	666.906	674.737	668.157	669.034	660.876	665.659	659.157	666.239	654.552	667.319	652.125	662.185	672.831	645.786	676.017	640.396	675.028	638.816	677.136	632.269	663.023	643.676	650.006	658.082	670.193	641.264	654.341	653.116	650.098	668.442	649.284	661.539	664.963	665.052	666.189	670.296	665.279	671.463	657.649	692.983	657.661	662.042	665.157	668.342
648.595	667.876	668.065	678.344	666.957	674.731	667.578	674.962	668.086	669.843	661.643	665.527	659.703	666.038	655.339	667.463	651.686	662.706	672.392	646.151	675.78	641.048	675.102	639.625	676.763	632.716	662.482	643.899	650.002	658.826	669.879	641.787	653.919	653.502	650.918	668.501	649.316	662.354	664.997	665.856	665.794	670.718	664.754	671.998	658.46	693.011	658.527	661.955	665.027	669.059
648.234	668.257	668.253	679.058	667.011	675.485	667.921	675.476	668.003	670.65	662.422	665.473	659.913	665.468	656.137	667.49	651.576	663.489	671.931	646.47	675.085	641.132	675.071	640.398	676.392	633.127	662.154	644.344	649.968	659.574	669.329	642.147	653.655	654.049	651.739	668.446	649.398	663.166	665.687	665.984	665.358	671.139	664.157	672.223	659.019	693.348	659.394	661.871	664.818	669.738
647.886	668.651	668.286	679.821	667.343	676.041	667.972	676.202	667.918	671.458	663.203	665.497	660.368	665.15	656.928	667.403	651.681	664.27	671.695	647.057	675.015	641.815	674.782	641.045	675.94	633.485	661.812	644.775	649.638	660.027	668.54	642.13	652.98	654.183	652.498	668.213	649.558	663.962	666.21	666.475	664.951	671.574	664.019	672.843	659.033	694.176	660.261	661.796	664.293	670.181
647.471	668.978	668.274	680.586	668.053	676.168	668.177	676.789	667.845	672.266	663.973	665.608	660.775	664.794	657.613	667.133	652.106	664.814	670.903	646.994	674.955	642.56	674.109	641.167	675.606	633.926	661.276	645.009	649.004	660.16	667.753	642.067	652.88	654.897	652.994	667.719	649.879	664.652	666.493	667.23	665.042	672.392	663.937	673.567	659.093	694.966	661.13	661.748	663.967	670.764
647.133	669.386	668.238	681.349	668.233	676.948	668.722	677.107	667.824	673.077	664.631	665.905	661.024	664.275	658.051	666.584	652.611	665.182	670.254	647.148	674.619	643.044	674.045	641.833	675.122	634.292	661	645.586	648.957	660.906	666.967	641.987	652.258	655.091	653.096	667.008	650.457	665.089	666.616	668.057	664.697	672.952	663.578	674.076	659.835	695.07	662	661.761	663.961	671.582
646.753	669.749	668.188	682.112	668.294	677.765	668.997	677.664	668.067	673.79	665.096	666.39	661.585	663.968	658.332	666.067	653.038	665.51	669.892	647.605	673.99	643.2	673.977	642.585	674.982	634.92	661.037	646.33	649.035	661.673	666.181	641.907	651.931	655.584	653.915	667.026	650.889	665.384	666.662	668.894	664.174	673.258	662.954	674.271	660.05	695.707	662.779	662.013	663.471	672.053
646.358	670.101	668.131	682.875	668.299	678.587	669.553	677.892	668.6	674.131	665.263	666.967	662.327	664.003	659.026	666.031	653.359	666.057	669.541	648.061	673.914	643.93	673.579	643.052	674.901	635.588	660.758	646.814	649.028	662.43	665.393	641.843	651.577	656.054	654.712	667	650.886	666.1	666.642	669.731	663.805	673.706	663.021	675.086	660.595	696.026	663.051	662.643	662.927	672.466
646.005	670.514	668.069	683.636	668.273	679.41	670.093	678.349	669.027	674.471	665.834	667.199	662.787	663.738	659.665	665.873	654.122	666.001	668.747	648.041	673.208	644.001	672.785	643.043	674.51	636.025	660.273	647.141	648.765	662.984	664.606	641.866	650.954	656.256	654.98	666.448	651.071	666.834	666.543	670.563	663.39	674.128	662.862	675.765	661.157	696.424	663.519	663.029	663.043	673.372
645.613	670.814	668.004	684.398	668.226	680.232	670.422	679.032	668.984	675.264	666.161	667.65	663.081	663.205	660.102	665.455	654.728	666.185	667.954	647.946	672.447	644.033	672.071	643.118	673.943	636.349	660.021	647.661	648.048	663.035	664.156	642.275	650.886	657.012	655.37	666.011	651.596	667.348	666.313	671.359	662.956	674.527	662.375	676.117	661.269	697.224	664.026	663.388	662.646	673.915
645.129	671.16	667.938	685.16	668.173	681.054	670.549	679.842	669.155	675.975	666.52	668.08	663.555	662.686	660.409	664.931	655.125	666.633	667.268	648.094	671.978	644.368	671.918	643.788	673.883	637.092	659.484	647.919	647.983	663.745	663.783	642.743	650.137	657.094	656.18	665.994	652.381	667.547	665.809	671.858	663.021	675.344	661.979	676.517	660.946	697.925	664.26	664.015	662.062	674.308
644.666	671.627	667.874	685.922	668.111	681.875	670.579	680.665	669.798	676.134	667.087	668.333	664.316	662.539	661.207	665.006	655.409	667.098	666.908	648.571	671.827	645.02	671.367	644.049	673.939	637.89	659.166	648.377	647.461	663.997	663.276	643.015	649.96	657.725	656.947	665.973	653.195	667.577	665.262	672.205	662.74	675.947	662.007	677.311	660.133	697.991	665.055	664.114	661.959	675.07
644.466	672.342	667.817	686.684	668.047	682.696	670.525	681.488	670.023	676.69	667.056	669.109	665.089	662.503	661.776	664.778	655.953	666.755	666.595	649.062	671.047	645.052	670.56	644.001	674.025	638.688	658.79	648.805	647.023	664.332	662.492	642.933	649.942	658.517	656.965	665.175	654	667.458	664.952	672.682	662.165	676.214	661.825	677.993	660.032	698.735	665.407	664.888	662.054	675.977
644.363	673.078	667.768	687.447	667.981	683.516	670.35	682.291	670.059	677.455	666.971	669.885	665.857	662.577	662.123	664.258	656.157	666.108	665.8	649.047	670.942	645.748	669.759	643.939	674.105	639.486	658.205	649.041	646.877	664.958	662.103	643.385	649.655	659.048	657.638	664.942	654.679	667.11	664.392	672.953	662	676.826	661.168	678.149	659.394	698.948	665.539	665.743	661.866	676.716
644.303	673.82	667.728	688.211	667.915	684.337	669.872	682.839	670.299	678.048	667.055	670.587	666.567	662.794	662.523	663.729	656.7	665.695	665.007	648.952	670.415	646.007	668.985	644.072	674.138	640.286	657.427	648.956	646.133	664.992	661.7	643.766	648.901	659.147	658.45	664.956	655.039	666.527	664.03	673.49	661.928	677.568	660.882	678.687	659.084	699.482	665.569	666.61	661.351	677.174
644.281	674.565	667.703	688.975	667.852	685.158	669.333	683.21	671.039	678.118	667.401	671.089	666.998	663.339	663.298	663.54	657.455	665.476	664.289	649.067	669.638	646.022	668.921	644.816	673.797	640.858	657.125	649.44	645.386	665.011	661.284	644.14	648.434	659.799	659.273	665.02	655.305	665.975	664.034	674.257	661.576	678.087	660.462	679.095	658.656	699.929	665.508	667.475	660.997	677.676
644.299	675.31	667.717	689.739	667.79	685.979	668.887	683.55	671.351	678.834	668.046	671.209	667.294	663.798	664.097	663.504	658.239	665.349	663.928	649.542	668.991	646.184	668.366	645.068	673.302	641.201	656.708	649.86	645.028	665.424	660.948	644.644	648.161	660.569	659.927	664.87	656.116	665.958	663.756	674.799	660.969	678.291	659.923	679.383	657.854	699.997	665.319	668.315	661.003	678.527
644.372	676.051	667.853	690.479	667.741	686.801	668.521	683.98	671.476	679.624	668.032	671.974	667.692	664.171	664.893	663.579	659.03	665.273	663.65	650.09	668.948	646.926	667.96	645.466	673.012	641.658	656.1	650.052	644.785	665.954	661.04	645.428	647.97	661.368	659.966	664.09	656.929	666.04	663.284	675.19	660.78	678.935	659.762	680.04	657.135	700.085	664.855	668.888	660.541	679.095
644.498	676.784	668.273	690.897	667.701	687.623	667.849	684.294	671.47	680.432	667.96	672.75	668.118	664.525	665.594	663.859	659.824	665.228	662.865	650.171	668.23	647.05	667.695	646.001	673.051	642.424	655.321	649.968	644.068	666.005	660.656	645.845	647.848	662.181	660.662	663.695	657.699	665.973	662.92	675.647	660.19	679.183	659.054	680.161	657.009	700.84	664.18	669.126	659.651	679.003
644.723	677.469	668.847	691.106	667.675	688.446	667.558	685.025	671.332	681.219	667.998	673.476	668.394	664.958	666.038	664.366	660.618	665.211	662.068	650.126	667.441	647.009	666.905	646.013	672.731	643.033	654.541	649.917	643.674	666.649	660.226	646.239	647.785	663.001	661.452	663.51	658.025	665.464	662.426	675.992	659.848	679.672	658.974	680.865	656.26	700.916	664.003	669.82	658.974	679.288
645.193	677.979	669.012	691.743	667.678	689.269	667.403	685.832	671.003	681.926	668.277	674.049	668.977	665.258	666.176	665.005	661.413	665.223	661.272	650.054	666.656	646.985	666.155	646.069	671.981	643.026	654.134	650.338	643.446	667.376	659.98	646.779	647.773	663.823	662.273	663.444	658.311	664.843	662.07	676.477	659.425	680.1	658.906	681.618	655.898	701.572	664.062	670.686	658.731	679.928
645.75	678.175	668.971	692.491	667.732	690.09	667.322	686.652	670.25	681.983	668.933	674.148	669.217	665.895	666.907	665.081	662.207	665.268	660.478	649.97	666.037	647.187	665.968	646.683	671.324	643.151	653.749	650.749	643.325	668.142	660.038	647.54	647.821	664.643	663.097	663.459	659.056	664.542	661.615	676.844	658.934	680.456	658.524	682.074	655.816	702.399	663.42	670.927	658.064	680.221
645.993	678.622	669.322	692.865	668.004	690.827	667.292	687.476	670.051	682.592	669.108	674.745	669.277	666.666	667.063	665.712	662.997	665.351	659.684	649.888	665.989	647.918	665.485	647.066	670.895	643.542	653.337	651.098	643.265	668.917	659.587	647.936	647.928	665.458	663.914	663.559	659.859	664.397	661.175	677.277	658.982	681.274	657.865	682.282	655.862	703.257	663.055	671.479	657.971	680.981
645.969	679.339	669.915	693.093	668.658	691.028	667.311	688.302	670.02	683.364	669.569	675.071	669.27	667.444	667.54	666.031	663.776	665.498	658.888	649.819	665.258	648.121	664.691	647.125	670.592	644.047	653.005	651.56	643.255	669.694	659.19	648.324	648.113	666.258	664.7	663.792	660.672	664.325	660.982	677.912	658.797	681.937	657.569	683.03	655.944	704.114	663.008	672.269	657.832	681.735
646.184	679.943	670.342	693.68	669.01	691.483	667.39	689.123	669.767	683.913	670.032	675.382	669.231	668.221	668.111	666.332	664.506	665.772	658.09	649.798	664.468	648.136	663.881	647.053	669.796	643.96	652.566	651.88	643.292	670.47	658.796	648.712	648.402	667.023	664.958	664.48	661.488	664.296	660.946	678.641	658.11	682.131	657.51	683.846	656.036	704.97	662.74	672.822	657.252	682.118
646.717	680.147	670.46	694.429	669.01	692.293	667.541	689.933	669.118	684.066	669.994	676.155	669.17	668.997	668.342	667.084	664.982	666.259	657.352	649.968	663.666	648.069	663.073	646.958	669.159	644.179	652.149	652.294	643.379	671.242	658.394	649.102	648.822	667.722	665.416	664.852	662.305	664.315	660.449	679.033	657.691	682.7	657.556	684.662	656.124	705.826	662.161	673.155	656.709	682.631
647.088	680.502	670.479	695.189	669.116	693.002	667.878	690.638	669.039	684.796	670.091	676.856	669.102	669.773	668.419	667.883	665.079	666.954	656.987	650.457	662.866	647.985	662.263	646.883	668.838	644.676	651.965	652.89	643.541	671.996	658.004	649.496	649.395	668.304	666.104	664.926	663.118	664.388	660.059	679.47	657.533	683.505	657.758	685.44	656.183	706.684	661.872	673.842	656.528	683.511
647.291	681.034	670.397	695.942	669.919	693.019	668.434	691.053	668.375	684.934	670.67	677.068	669.032	670.549	668.437	668.685	665.812	667.009	656.749	650.996	662.065	647.901	661.478	646.955	668.477	645.111	651.973	653.596	643.809	672.719	657.616	649.898	650.122	668.673	666.784	665.072	663.923	664.52	659.617	679.849	657.519	684.335	658.217	685.961	656.106	707.531	661.923	674.709	656.523	684.419
647.919	681.158	670.196	696.661	670.304	693.674	669.015	691.276	667.877	685.404	671.039	677.474	668.958	671.324	668.436	669.488	665.993	667.619	656.004	651.048	661.262	647.849	661.021	647.357	667.945	645.381	651.521	653.94	644.456	672.979	657.22	650.279	650.911	668.872	667.118	665.709	664.683	664.802	659.162	680.277	657.625	685.155	658.921	686.079	655.575	707.905	662.025	675.573	656.686	685.297
648.003	681.776	669.589	696.939	670.49	694.46	668.987	692.096	667.652	686.144	671.032	678.24	668.89	672.099	668.421	670.29	666.428	667.971	655.986	651.828	660.478	647.917	660.82	647.959	667.764	646.021	651.062	654.347	644.773	673.37	656.833	650.689	651.725	668.919	666.999	666.527	664.952	665.455	658.958	680.91	657.969	685.883	658.965	686.831	655.149	708.346	662.116	676.439	657.142	685.987
648.039	682.467	669.18	697.322	670.556	695.278	669.086	692.836	667.665	686.948	671.079	678.964	668.831	672.875	668.391	671.092	666.96	668.239	655.377	652.017	660.071	648.351	660.05	648.05	667.011	646.006	650.91	654.988	645.105	673.824	656.377	651.025	652.534	668.819	667.439	666.854	665.372	665.859	658.902	681.619	658.725	685.982	658.977	687.632	655.047	709.071	662.128	677.304	657.985	686.036
648.236	683.036	669.018	697.886	670.542	696.098	669.707	693.049	667.846	687.733	671.772	679.054	668.784	673.652	668.353	671.894	667.047	668.983	654.985	652.423	659.836	648.933	659.243	647.956	666.324	646.123	650.969	655.768	645.671	674.234	655.596	650.906	653.302	668.558	668.005	667.258	665.837	666.193	658.441	681.997	658.988	686.549	659.475	687.955	654.936	709.798	661.743	677.846	658.007	686.919
648.877	683.126	669.03	698.599	670.447	696.914	670.223	693.493	668.522	687.904	672.248	679.515	668.757	674.43	668.306	672.695	667.017	669.763	654.768	652.999	659.092	649.05	658.454	647.971	665.906	646.528	651.063	656.547	646.447	674.289	655.056	651.284	653.916	668.039	668.399	667.885	666.079	666.78	657.811	682.379	659.386	686.984	659.921	688.321	654.25	710.094	661.239	678.246	658.835	687.006
649.088	683.652	668.552	698.956	670.188	697.688	670.462	694.268	669.067	688.344	672.513	680.233	668.783	675.207	668.255	673.496	667.572	669.971	654.032	653.051	658.294	648.949	658.06	648.393	665.64	647.076	651.103	657.328	647.224	674.274	654.957	651.944	654.013	667.286	668.549	668.693	666.693	666.935	657.554	683.138	659.968	687.234	660.152	688.895	653.399	709.964	660.873	678.722	659.72	687.001
649.436	684.05	668.211	699.345	669.529	697.942	670.554	695.086	669.409	689.013	672.66	681	669.11	675.841	668.201	674.297	668.118	670.346	653.987	653.806	657.495	648.937	657.809	648.951	664.849	647.138	650.75	657.82	648.001	674.231	654.886	652.603	654.564	667.038	668.593	669.518	667.201	667.466	657.447	683.965	660.085	687.946	660.884	688.984	653.118	710.511	660.327	679.055	659.972	687.645
650.047	684.192	667.839	699.764	669.141	698.377	670.557	695.911	669.581	689.805	672.741	681.778	669.629	676.159	668.144	675.098	668.452	671.034	653.977	654.581	657.075	649.337	657.023	648.996	664.051	647.069	650.291	658.198	648.777	674.172	654.525	653.054	655.362	667.019	668.55	670.344	667.461	668.194	657.434	684.801	660.849	688.008	661.685	688.969	652.608	710.969	660.025	679.622	660.553	687.973
650.027	684.932	667.34	700.112	669.058	699.075	670.469	696.73	669.699	690.608	672.783	682.559	670.048	676.48	668.086	675.899	668.602	671.813	653.605	654.986	656.805	649.882	656.22	648.962	663.254	646.981	649.965	658.648	649.552	674.103	653.993	653.346	655.975	666.795	668.388	671.15	667.558	669.002	657.505	685.633	660.99	688.695	661.989	689.532	651.855	711.093	659.462	679.931	660.974	688.462
650.067	685.621	666.578	700.06	668.969	699.794	670.234	697.504	669.763	691.418	672.8	683.34	670.016	677.252	668.026	676.699	668.678	672.605	653.01	655.208	656.152	650.016	656.041	649.601	662.456	646.902	650.058	659.426	650.326	674.026	654.017	654.069	656.047	666.054	667.973	671.779	667.57	669.817	657.701	686.428	661.541	688.967	662.019	690.301	650.999	711.007	659.114	680.454	661.377	688.969
650.399	686.03	665.818	699.982	668.314	700.081	669.702	697.921	669.81	692.228	672.795	684.122	669.934	678.026	667.965	677.5	668.722	673.398	652.8	655.936	656.039	650.701	655.568	649.946	661.676	646.904	649.676	659.86	651.101	673.949	653.856	654.697	656.813	665.978	667.424	672.166	667.507	670.63	658.217	687.013	661.959	689.389	662.215	690.862	650.143	710.923	658.631	680.84	661.959	689.294
651.084	686.111	665.295	700.188	667.505	699.988	669.122	698.184	669.841	693.039	672.768	684.904	670.085	678.691	667.906	678.3	668.742	674.192	652.827	656.734	655.47	650.907	655.07	650.259	660.97	647.153	649.186	660.222	651.875	673.875	653.46	655.128	657.619	665.985	666.936	672.464	667.301	671.416	658.841	687.199	662.007	690.181	662.829	691.059	649.339	710.957	658.203	681.28	662.212	689.946
651.344	686.801	664.948	700.654	667.135	700.414	669.021	698.905	669.85	693.851	672.691	685.682	670.512	679.087	667.849	679.101	668.737	674.987	652.887	657.53	655.054	651.342	654.903	650.901	660.871	647.832	648.896	660.745	652.65	673.807	652.96	655.395	657.971	665.543	666.666	673.041	666.771	671.872	659.144	687.725	662.073	690.912	662.97	691.753	649.016	711.568	657.804	681.738	662.93	690.132
651.463	687.528	664.61	701.247	666.717	700.845	669.067	699.727	669.833	694.663	672.57	686.454	671.058	679.322	667.792	679.902	668.706	675.782	652.964	658.325	654.937	652.071	654.185	650.984	660.286	648.032	648.943	661.528	653.426	673.749	652.706	655.932	658.263	664.924	666.073	673.268	666.26	672.242	659.589	688.114	662.837	690.971	663.607	691.891	648.514	711.954	657.285	682.084	663.055	690.912
651.483	688.269	663.889	701.457	666.057	701.012	668.435	699.942	669.798	695.474	672.376	687.207	671.071	680.094	667.743	680.703	668.633	676.573	653.042	659.12	655.031	652.869	654.045	651.647	659.494	647.99	649.035	662.307	654.204	673.727	652.215	656.225	658.951	664.544	665.787	673.805	666.008	672.764	660.078	688.455	662.952	691.691	664.14	692.366	647.736	711.967	656.94	682.679	663.87	690.99
651.419	689.008	663.137	701.577	665.302	701.004	668.105	700.438	669.738	696.284	672.044	687.85	670.995	680.867	667.696	681.504	668.524	677.36	653.107	659.916	655.07	653.668	653.521	651.918	658.716	647.953	649.097	663.088	654.979	673.759	651.842	656.632	659.755	664.372	665.325	674.164	666.034	673.531	660.32	689.048	663.532	691.941	664.481	693.078	647.19	712.276	657.037	683.543	664.036	691.787
651.145	689.682	662.376	701.635	665.039	701.594	667.729	700.898	669.635	697.089	671.331	687.971	671.054	681.572	667.656	682.306	668.35	678.132	653.028	660.7	654.497	653.908	653.041	652.291	658.007	648.119	648.886	663.707	655.655	673.958	651.518	657.089	660.573	664.28	664.882	674.538	665.584	673.979	661.005	689.201	664.007	692.357	664.658	693.876	646.772	712.743	656.53	683.916	664.001	692.681
650.58	689.924	661.612	701.645	664.525	701.891	667.004	701.017	669.47	697.881	671.042	688.505	671.396	682.042	667.628	683.108	668.027	678.769	652.483	660.956	654.096	654.354	652.916	653.047	657.919	648.819	648.447	664.13	656.093	674.473	650.97	657.329	661.395	664.237	664.599	675.069	665.145	674.343	661.174	689.865	664.088	693.157	664.765	694.689	646.335	713.141	656	684.361	664.608	692.949
650.12	690.207	660.85	701.59	664.181	702.347	666.201	700.963	669.185	698.6	670.997	689.209	672.116	682.132	667.606	683.91	667.367	678.97	651.904	661.296	653.99	655.06	653.014	653.855	657.323	648.996	647.936	664.402	656.391	674.849	650.738	657.871	662.217	664.231	663.981	675.266	664.753	674.762	661.762	690.133	664.002	693.986	664.824	695.507	646.015	713.645	656.178	684.8	665.195	693.463
650.054	690.877	660.1	701.459	663.79	702.807	666.045	701.653	668.605	699.04	671.058	689.987	672.379	682.859	667.615	684.713	666.864	679.438	651.524	661.944	653.987	655.786	653.056	654.665	656.56	649.021	648.007	665.181	656.841	675.228	650.234	658.184	663.039	664.259	663.782	675.887	664.344	675.168	662.017	690.679	663.966	694.817	664.848	696.328	645.488	714.175	656.695	685.206	665.506	694.279
650.053	691.604	659.427	701.176	663.173	703.052	665.485	701.914	668.112	699.341	671.053	690.748	672.526	683.618	667.661	685.513	666.605	680.126	651.37	662.727	653.323	655.926	652.498	654.911	655.989	649.257	647.799	665.758	657.117	675.781	649.968	658.689	663.859	664.326	663.246	676.173	663.91	675.547	662.036	691.466	664.662	694.946	664.835	697.148	644.64	714.219	657.129	685.626	665.643	695.18
649.611	691.955	658.906	700.706	662.376	702.975	665.133	702.369	668.035	700.003	670.431	690.911	672.599	684.391	667.791	686.298	666.488	680.91	651.331	663.523	652.97	656.498	652.006	655.322	655.939	650.007	647.325	666.119	657.083	676.556	649.97	659.425	664.671	664.451	662.867	676.62	663.565	676.015	662.314	692.063	665.185	695.445	664.789	697.967	643.78	714.183	657.547	686.083	665.704	696.09
648.934	692.043	658.798	700.103	662.093	703.506	664.787	702.861	667.887	700.657	670.013	691.384	672.62	685.169	668.108	686.926	666.434	681.702	651.378	664.317	652.884	657.239	651.815	656.056	655.154	649.991	646.771	666.446	656.993	677.328	649.719	659.989	665.443	664.711	662.514	677.094	663.091	676.356	663.029	692.178	665.48	696.19	664.709	698.783	642.923	714.109	658.024	686.47	665.704	697.003
648.2	691.96	658.271	699.861	661.669	704.076	664.105	703.05	667.466	701.103	669.828	692.057	672.59	685.946	668.839	687	666.43	682.496	651.549	665.085	652.946	658.04	651.831	656.868	654.382	650.016	646.58	667.199	657.274	677.808	649.105	660.206	665.889	665.254	661.944	677.352	662.72	676.799	663.152	692.901	665.62	697.01	664.582	699.593	642.067	714.022	658.405	686.963	665.638	697.913
648.081	692.578	657.891	699.475	660.995	704.362	663.286	702.971	666.971	701.422	669.84	692.837	672.486	686.717	668.985	687.666	666.487	683.288	651.903	665.75	653.037	658.84	651.897	657.678	653.987	650.427	646.621	667.976	657.816	678.119	648.919	660.814	666.26	665.745	661.755	677.994	662.307	677.202	663.766	693.131	665.691	697.841	664.336	700.37	641.21	713.935	658.868	687.35	665.498	698.813
647.634	692.871	657.674	698.944	660.183	704.377	663.088	703.574	667.081	702.225	669.897	693.617	672.248	687.439	668.997	688.434	666.628	684.066	652.532	666.168	653.118	659.641	651.973	658.488	653.78	651.024	646.898	668.668	658.42	678.47	648.966	661.599	666.693	666.086	661.138	678.206	661.878	677.589	664.115	693.62	665.711	698.675	663.816	700.877	640.353	713.857	659.278	687.844	665.229	699.675
647.172	693.151	657.05	698.815	659.433	704.186	662.623	704.108	666.808	702.855	669.973	694.396	671.799	687.918	669.298	688.905	666.964	684.692	653.318	666.066	653.108	660.439	652.042	659.299	653.001	651.048	647.399	669.085	658.829	679.126	649.059	662.384	667.03	666.608	660.832	678.73	661.515	678.045	664.496	694.081	665.681	699.509	663.308	701.244	639.495	713.799	659.948	688.002	664.479	700.02
647.044	693.77	656.864	698.248	658.967	703.625	661.926	704.406	666.192	703.073	670.052	695.174	671.11	687.992	669.933	689.11	667.51	685.094	653.75	666.32	652.686	660.858	652.073	660.11	652.955	651.799	648.003	669.236	659.12	679.847	649.136	663.171	667.509	666.884	660.403	679.129	661.044	678.389	665.05	694.364	665.588	700.338	662.903	701.606	638.638	713.835	660.662	688.128	664.077	700.496
646.44	693.918	656.448	697.91	658.673	703.131	661.109	704.484	665.484	703.113	670.127	695.952	670.988	688.715	670.368	689.724	667.985	685.397	654.119	666.781	652.194	661.218	651.95	660.816	652.389	652.026	648.11	669.931	659.365	680.584	648.882	663.836	668.067	667.315	659.906	679.459	660.693	678.852	665.022	695.187	665.401	701.146	662.505	702.049	638.107	714.289	661.132	688.567	664.098	701.331
646.136	694.357	655.949	697.652	658.221	702.758	660.288	704.449	665	703.419	670.19	696.732	671.023	689.477	670.523	690.506	667.957	686.136	654.643	667.217	651.963	661.817	651.283	660.982	651.998	652.429	648.759	670.197	659.562	681.336	648.374	664.152	668.415	667.978	659.679	680.056	660.256	679.228	665.14	695.924	665.005	701.779	662.07	702.408	637.719	714.802	661.493	689.058	663.684	701.939
645.868	694.843	655.835	697.006	657.816	702.333	659.484	704.278	664.766	704.121	670.222	697.513	671.062	690.248	670.603	691.303	668.173	686.721	655.437	667.297	652.05	662.617	650.683	661.425	651.758	652.984	649.526	670.278	659.716	682.098	647.916	664.468	668.556	668.783	659.014	680.221	659.843	679.627	665.814	696.101	664.371	702.115	661.687	702.887	637.112	714.991	662.011	689.417	662.89	702.031
645.251	695.027	655.205	696.873	657.437	701.888	659.07	703.689	664.062	704.417	670.168	698.288	670.916	690.88	670.627	692.105	668.613	687.129	656.235	667.283	651.521	662.895	650.315	662.097	651.014	653.039	650.311	670.263	659.836	682.867	647.715	665.068	668.592	669.604	658.812	680.809	659.485	680.083	666.287	696.626	664.052	702.564	661.029	703.001	636.378	715.073	662.365	689.93	662.245	702.237
644.517	694.959	654.906	696.407	656.948	701.55	658.692	703.21	663.268	704.565	669.826	698.812	670.203	690.94	670.599	692.906	669.067	687.495	657.033	667.244	650.987	663.305	650.132	662.88	650.965	653.822	651.094	670.217	659.929	683.639	647.086	665.198	668.548	670.425	658.26	681.105	658.968	680.394	666.502	697.417	663.546	702.907	660.354	703.114	635.902	715.521	662.861	690.31	661.802	702.737
644.134	695.305	654.613	695.934	656.64	701.053	658.099	703.046	662.46	704.634	669.319	699.146	669.945	691.576	670.513	693.704	668.992	688.285	657.83	667.19	650.72	663.93	650.092	663.686	650.974	654.6	651.876	670.155	659.979	684.414	646.867	665.776	668.39	671.231	657.738	681.546	658.669	680.853	666.573	698.251	663.166	703.364	659.899	703.524	635.568	716.018	663.26	690.766	661.186	703.022
643.863	695.8	653.963	695.817	656.101	700.725	657.369	702.984	661.649	704.645	669.045	699.594	669.899	692.321	670.281	694.467	669.262	688.79	658.626	667.127	650.875	664.642	650.189	664.491	650.58	654.979	652.657	670.083	659.989	685.192	646.364	666.097	667.933	671.83	657.499	682.324	658.084	681.184	666.563	699.088	662.741	703.772	659.576	703.998	635.05	716.364	663.742	691.184	660.387	703.059
643.28	695.957	653.867	695.138	655.993	700.072	656.909	702.488	660.838	704.597	668.557	699.894	669.966	693.096	669.74	694.872	669.792	689.131	659.421	667.053	651.462	665.031	650.49	665.242	649.914	655.183	653.438	670.007	659.971	685.969	645.584	666.115	667.376	672.184	657.41	683.144	657.657	681.743	666.454	699.918	662.304	704.162	659.096	704.348	634.691	716.859	664.057	691.742	659.908	703.547
643.091	696.517	653.369	694.882	655.897	699.374	657.012	701.672	660.038	704.462	668.194	700.311	670.055	693.869	669.227	695.239	670.309	689.567	660.217	666.979	651.809	665.394	650.974	665.877	649.552	655.888	654.219	669.93	659.907	686.744	644.799	666.028	666.917	672.503	657.418	683.971	657.485	682.535	666.15	700.684	661.964	704.644	658.722	704.783	634.225	717.252	664.077	692.517	659.508	704.031
642.682	696.855	652.947	694.539	655.511	698.892	656.7	701.144	659.342	704.12	667.824	700.717	670.127	694.645	668.968	695.778	670.542	690.323	661.012	666.904	652.211	665.895	651.602	666.366	649.37	656.668	655	669.856	659.774	687.509	644.015	665.928	666.635	673.054	657.515	684.79	657.423	683.348	665.507	700.963	661.454	705.035	658.278	705.183	633.799	717.679	664.464	693.005	658.994	704.435
642.2	697.116	652.789	693.885	654.967	698.638	656.259	700.756	658.971	703.553	667.376	701.05	670.096	695.411	669.06	696.575	670.667	691.108	661.808	666.835	652.813	666.234	652.327	666.713	649.245	657.459	655.782	669.79	659.586	688.262	643.228	665.863	666.045	673.273	657.795	685.54	657.449	684.163	665.077	701.369	660.643	704.958	657.964	705.689	633.372	718.123	665.19	693.292	658.608	704.933
642.036	697.698	652.098	693.597	654.713	698.075	655.839	700.36	658.726	703.018	667.056	701.512	669.744	695.867	669.111	697.375	670.742	691.899	662.604	666.776	653.612	666.311	653.101	666.946	649.164	658.257	656.565	669.745	659.347	688.999	642.473	665.952	665.78	673.825	658.34	685.96	657.574	684.968	664.786	701.902	660.158	705.32	658.012	706.466	632.949	718.584	665.479	694.091	658.048	705.337
641.504	697.894	651.353	693.468	654.203	697.769	655.458	699.914	657.927	703.047	666.616	701.855	669.179	696.096	668.72	697.85	670.773	692.693	663.401	666.729	654.417	666.317	653.901	667.084	649.119	659.057	657.348	669.73	659.035	689.711	641.916	666.295	665.303	674.17	658.946	686.172	657.899	685.665	664.124	702.072	659.745	705.751	657.639	706.971	633.026	719.42	665.63	694.944	658.008	706.133
641.133	698.283	650.591	693.426	653.826	697.326	654.985	699.558	657.178	702.954	666.237	702.257	668.997	696.732	668.276	698.24	670.767	693.488	664.2	666.709	655.221	666.273	654.71	667.155	649.1	659.859	658.128	669.769	658.576	690.335	641.869	666.993	664.874	674.559	659.011	686.937	658.451	686.068	664.033	702.809	659.323	706.149	657.124	707.293	632.652	719.95	665.7	695.811	657.763	706.791
640.981	698.894	649.829	693.447	653.449	696.879	654.631	699.103	656.978	702.348	665.875	702.677	669.049	697.495	667.894	698.638	670.729	694.282	664.994	666.75	656.024	666.22	655.522	667.164	649.104	660.661	658.876	669.971	658.029	690.875	641.142	667.079	664.553	675.063	659.793	686.978	659.013	686.3	663.333	702.94	658.934	706.594	657.04	707.942	632.069	720.284	665.712	696.681	657.225	707.211
641.05	699.633	649.073	693.548	652.937	696.564	654.146	698.724	656.524	701.996	665.414	703	668.662	697.871	667.453	699.007	670.643	695.071	665.671	667	656.826	666.158	656.334	667.12	649.141	661.462	659.013	670.639	657.409	691.325	640.595	667.542	663.933	675.301	659.963	687.631	658.941	687.112	663.081	703.521	658.494	706.983	656.935	708.656	631.96	720.994	665.673	697.549	656.948	707.831
640.558	699.899	648.377	693.827	652.681	695.979	653.996	698.094	655.998	701.713	665.119	703.459	668.162	698.18	667.085	699.442	670.489	695.848	666.142	667.473	657.628	666.088	657.141	667.03	649.21	662.261	659.425	670.995	656.726	691.685	640.213	668.215	664.019	676.118	660.458	687.963	659.075	687.853	662.629	703.911	658.094	707.414	656.456	709.087	632.049	721.849	665.572	698.412	657.033	708.739
640.197	700.275	648.047	694.362	652.159	695.726	653.917	697.393	655.997	700.914	664.694	703.87	667.977	698.812	666.663	699.807	670.194	696.564	666.347	667.98	658.429	666.015	657.942	666.893	649.319	663.055	659.982	671.228	655.983	691.917	639.954	668.96	663.835	676.778	660.96	688.288	659.673	688.081	662.107	704.231	657.672	707.826	655.65	708.998	631.953	722.603	665.378	699.253	656.976	709.564
639.945	700.751	647.829	694.909	651.846	695.147	653.512	696.918	655.997	700.123	664.082	704.041	668.054	699.585	666.239	700.207	669.696	697.05	666.892	668.262	659.231	665.94	658.725	666.68	649.477	663.838	660.11	671.955	655.221	692.054	639.77	669.728	663.345	677.141	661.126	688.948	660.058	688.518	661.928	704.893	657.258	708.244	655.088	709.279	631.52	723.117	664.944	699.97	656.526	710.12
639.399	701.02	647.14	694.978	651.324	694.677	653.014	696.612	655.31	699.999	663.392	704.051	667.577	699.896	665.971	700.756	668.976	697.11	667.213	668.693	660.032	665.87	659.459	666.351	649.765	664.579	660.018	672.734	654.448	692.136	639.641	670.507	662.974	677.567	661.909	688.988	660.353	689.032	661.166	705.019	656.843	708.664	654.783	709.827	630.959	723.379	664.175	700.072	655.948	710.408
638.688	700.991	646.389	694.976	650.542	694.457	652.689	696.106	654.996	699.5	663.085	704.503	667.167	700.279	666.045	701.536	668.92	697.857	667.641	669.07	660.835	665.805	659.875	665.799	650.355	664.946	660.001	673.505	653.673	692.179	639.551	671.29	663.009	678.357	661.982	689.737	661.157	688.994	660.335	704.948	656.42	709.076	654.202	710.02	630.703	723.989	663.947	700.719	655.665	711.045
638.224	701.222	646.067	695.409	649.724	694.365	652.233	695.754	654.678	699.012	662.698	705.076	666.902	700.785	665.585	701.932	668.339	698.07	668.237	669.406	661.637	665.748	660.108	665.138	650.758	665.322	660.326	673.941	652.895	692.171	639.502	672.078	662.775	679.012	662.57	689.968	661.935	689.07	660.07	705.521	656.039	709.505	653.469	710.064	630.134	724.255	663.411	701.058	655.055	711.296
637.969	701.721	645.793	695.901	648.902	694.348	651.838	695.309	654.044	698.845	662.074	705.404	666.304	700.963	665.185	702.328	667.95	698.471	668.516	670.149	662.441	665.701	660.698	664.698	651.059	665.801	660.947	674.111	652.119	692.122	639.502	672.868	662.146	679.198	662.947	690.409	662.077	689.744	659.603	705.901	655.597	709.962	652.933	710.4	629.802	724.802	662.949	701.461	654.765	711.982
637.457	702.078	645.125	696.012	648.081	694.392	651.372	694.944	654	698.085	661.307	705.536	666.099	701.519	664.787	702.727	667.716	699.025	668.666	670.931	663.246	665.696	661.498	664.563	651.591	666.312	661.247	674.802	651.344	692.056	639.57	673.655	661.843	679.722	663.251	690.922	662.569	690.062	659.114	706.252	654.856	709.987	652.727	711.036	629.191	725.014	662.646	702.027	653.965	712.145
636.753	702.106	644.369	695.976	647.268	694.508	650.582	694.982	653.988	697.299	660.527	705.582	665.658	701.847	664.385	703.124	666.999	699.097	668.766	671.723	664.046	665.752	662.307	664.504	652.371	666.482	661.323	675.575	650.571	691.969	639.702	674.431	661.416	680.123	663.897	691.093	663.037	690.403	658.885	706.864	654.264	710.207	651.952	710.989	628.433	725.085	661.8	702.037	653.057	712.099
636.011	702.044	644.081	696.438	646.519	694.769	650.031	694.684	653.465	697.022	659.747	705.545	665.209	702.173	663.998	703.518	666.929	699.812	668.825	672.519	664.705	666.034	663.119	664.513	653.169	666.539	661.345	676.358	649.801	691.853	639.905	675.19	660.911	680.443	663.981	691.829	663.236	691.01	658.162	706.979	653.852	710.67	651.271	711.144	627.916	725.463	660.938	701.926	652.149	712.003
635.27	701.961	643.758	696.874	645.997	695.257	649.784	694.035	653.048	696.636	658.981	705.411	664.99	702.734	663.604	704.002	666.373	700.044	668.848	673.317	665.148	666.507	663.921	664.607	653.969	666.524	661.339	677.142	649.033	691.729	640.197	675.918	660.699	681.053	664.671	691.951	663.974	691.081	658.044	707.696	653.375	711.045	650.87	711.594	627.633	726.046	660.111	702.041	651.24	711.916
634.529	701.884	643.107	696.976	645.932	696.001	649.166	693.75	652.816	696.063	658.338	705.084	664.404	702.933	662.884	704.016	666.02	700.456	668.838	674.115	665.39	667.018	664.656	664.846	654.764	666.435	661.317	677.927	648.267	691.593	640.602	676.591	660.029	681.21	664.963	692.512	664.054	691.808	657.448	707.932	652.547	710.946	650.517	712.039	626.779	725.959	659.96	702.761	650.417	712.028
633.786	701.869	642.353	696.946	645.116	695.963	648.442	693.884	652.058	696.013	657.89	704.581	664.124	703.434	662.299	704.19	666.031	701.225	668.795	674.913	665.951	667.296	665.006	665.469	655.518	666.239	661.272	678.71	647.502	691.451	641.202	677.106	659.821	681.791	665.001	693.294	664.649	692.031	657.099	708.411	652.103	711.369	649.714	711.982	626.101	726.197	659.365	703.026	649.902	712.519
633.24	702.114	642.029	697.445	644.322	696	647.942	694.357	652.034	695.224	657.713	704.023	663.734	703.832	661.913	704.652	665.944	701.962	668.72	675.707	666.25	667.762	665.4	665.846	655.953	665.688	661.224	679.493	646.738	691.304	641.916	677.422	659.288	682.098	665.192	693.888	665.029	692.472	656.728	708.869	651.715	711.88	649.053	712.203	625.815	726.78	659.008	703.533	649.55	713.113
632.912	702.614	641.963	698.14	644.003	696.51	647.794	695.018	651.422	694.989	657.148	703.783	663.241	704.12	661.57	705.247	665.204	702.055	668.598	676.495	666.75	668.116	665.798	666.264	656.233	665.064	661.171	680.276	645.974	691.158	642.68	677.593	658.753	682.512	665.861	694.038	665.036	693.274	656.173	709.138	651.072	712.06	648.832	712.801	625.337	727.155	658.978	704.366	648.652	713.199
632.505	702.912	641.93	698.791	643.679	697.009	647.082	695.142	650.627	694.986	656.828	703.329	663.065	704.68	660.789	705.396	664.443	702.059	668.388	677.254	667.282	668.542	666.195	666.666	656.79	664.682	661.112	681.058	645.208	691.021	643.464	677.651	658.505	683.283	665.96	694.77	665.091	694.003	656.023	709.798	650.242	711.982	648.271	713.019	624.899	727.596	658.737	704.983	647.74	713.158
632.174	703.329	641.326	698.946	643.007	697.16	646.877	695.768	650.06	694.785	656.465	702.911	662.57	705.176	659.997	705.358	664.006	702.382	667.988	677.919	667.529	669.298	666.638	667.011	657.57	664.524	661.053	681.841	644.438	690.912	644.253	677.629	658.411	684.099	666.613	694.926	665.884	694.023	655.332	710.056	649.479	711.987	647.519	713.063	624.503	728.09	658.04	705.143	646.83	713.08
631.808	703.704	641.054	699.478	642.968	697.942	646.376	696.1	649.956	694.054	655.928	702.641	661.894	705.448	659.335	705.06	663.83	703.042	667.272	677.997	667.625	670.097	667.247	667.414	658.37	664.465	660.991	682.623	643.684	690.908	645.037	677.54	658.419	684.922	667.15	695.396	666.301	694.636	654.521	710.009	648.997	712.413	646.956	713.34	623.649	728.066	657.999	705.969	645.921	712.993
631.378	703.998	640.996	700.163	642.238	698.022	645.909	696.461	649.287	693.686	655.959	701.867	661.128	705.559	658.904	704.552	663.146	703.401	667.015	678.531	667.651	670.901	667.491	668.177	659.172	664.479	660.929	683.405	642.992	691.108	645.817	677.417	658.51	685.738	667.456	696.127	666.525	695.406	653.689	709.951	648.679	713.004	646.829	714.041	622.795	727.965	657.978	706.809	645.012	712.91
630.995	704.452	640.9	700.774	642.008	698.614	645.675	697.044	648.529	693.77	656.046	701.091	660.351	705.59	658.701	703.978	662.362	703.492	666.66	678.973	667.624	671.704	667.625	668.975	659.964	664.589	660.869	684.187	642.933	691.815	646.594	677.27	658.77	686.491	667.569	696.943	666.641	696.213	653.166	710.245	647.951	713.096	646.047	714.181	622.088	728.181	657.313	707	644.101	712.84
630.959	705.123	640.313	700.947	641.98	699.401	644.956	697.157	648.066	694.265	655.948	700.399	659.576	705.534	658.068	703.792	661.571	703.477	666.015	679.13	667.536	672.502	667.691	669.784	660.655	664.904	660.81	684.97	642.39	692.043	647.368	677.113	659.286	686.949	667.588	697.769	666.699	697.027	652.863	710.801	647.12	713.027	645.232	714.189	621.864	728.847	657.028	707.579	643.19	712.815
631.029	705.864	639.995	701.49	641.739	699.963	644.865	697.96	647.941	695.004	655.594	699.914	658.821	705.37	657.825	703.235	660.799	703.34	665.959	679.909	667.357	673.274	667.709	670.597	661.092	665.425	660.753	685.752	642.002	692.424	648.145	676.969	659.94	687.105	667.518	698.593	666.711	697.845	652.207	711.027	646.289	712.946	644.413	714.139	621.303	729.307	656.997	708.411	642.339	712.991
631.054	706.575	639.925	702.179	641.058	700.093	644.907	698.778	647.944	695.711	654.981	699.778	658.252	704.986	657.358	702.882	660.154	703.013	666.001	680.698	666.957	673.927	667.685	671.409	661.252	666.03	660.705	686.536	641.984	693.173	648.805	677.121	659.976	687.894	667.304	699.384	666.659	698.66	651.376	710.944	645.516	712.973	643.596	714.068	620.48	729.505	656.683	708.954	641.908	713.562
630.592	706.918	639.998	702.939	640.936	700.861	644.997	699.598	647.373	695.913	654.833	699.147	657.875	704.454	656.954	702.49	660.013	702.301	665.494	680.963	666.255	674.042	667.605	672.217	661.93	666.152	660.661	687.319	641.94	693.908	649.09	677.648	660.73	687.963	666.792	699.852	666.553	699.469	651.104	711.504	644.974	713.357	642.779	713.987	619.623	729.563	656.064	709.197	641.505	714.076
630.204	707.292	640.089	703.698	641.012	701.673	645.084	700.419	646.986	696.465	654.326	698.874	657.566	704.045	657.005	701.708	659.453	702.094	664.893	681.266	666.021	674.579	667.44	673.011	662.116	666.749	660.626	688.103	641.302	694.037	649.475	678.07	660.965	688.553	666.258	700.214	666.358	700.258	650.617	711.906	644.727	713.985	641.962	713.904	618.764	729.537	655.928	709.925	640.601	714.08
630.02	707.814	640.095	704.458	641.024	702.477	645.111	701.233	646.916	697.204	653.912	698.506	657.131	703.682	656.81	701.052	659.134	701.634	664.565	681.975	666.015	675.361	667.08	673.694	662.6	667.07	660.605	688.887	641.005	694.511	650.26	678.075	661.382	688.96	666.006	700.761	665.96	700.854	649.894	712.007	644.011	714.148	641.144	713.84	617.911	729.425	655.121	709.986	639.693	713.992
630.084	708.537	639.692	704.85	640.66	702.929	644.925	702.003	646.994	698.012	653.685	697.946	656.768	703.283	656.193	700.846	658.791	701.19	664.422	682.758	665.83	675.997	666.531	674.122	663.054	667.431	660.608	689.671	640.977	695.258	651.045	677.986	661.944	689.218	666.097	701.581	665.254	701.039	649.259	712.132	643.18	714.134	640.324	713.81	617.168	729.044	655.035	710.755	638.784	713.899
629.647	708.98	639.245	705.195	640.05	703.153	644.171	702.075	647.078	698.819	653.034	697.809	656.374	702.894	655.981	700.304	658.242	700.96	664.366	683.553	665.051	676.021	665.963	674.324	663.049	668.226	660.644	690.454	640.927	695.981	651.831	677.903	662.055	689.922	665.554	701.941	665.04	701.634	649.009	712.715	642.348	714.066	639.548	713.915	617.018	728.312	654.383	711.104	637.876	713.851
628.997	709.049	639.01	705.711	639.895	703.928	644.003	702.681	647.113	699.627	652.845	697.21	655.908	702.521	655.966	699.549	658.054	700.35	664.364	684.351	664.979	676.758	666.044	675.132	662.947	669.022	660.765	691.219	640.219	696.027	652.582	677.99	662.806	690.003	665.175	702.366	665.056	702.411	648.424	713.164	641.518	713.984	638.976	714.278	616.435	728.039	653.535	711.157	637.051	714.068
628.398	709.125	639.09	706.467	639.989	704.746	643.992	703.487	646.534	699.933	652.39	696.879	655.963	701.748	655.722	698.937	657.507	700.121	664.419	685.145	664.453	677.027	665.863	675.827	663.052	669.765	661.071	691.83	639.893	696.579	653.073	678.368	663.612	689.983	664.762	702.8	664.684	702.862	647.603	713.207	640.687	713.9	638.912	715.013	615.605	728.012	652.668	711.089	636.949	714.867
628.041	709.485	638.687	706.918	640.08	705.564	643.694	704.045	646.119	700.375	651.915	696.574	656.043	700.975	655.024	698.827	657.121	699.678	664.546	685.929	663.867	677.342	665.329	676.124	663.582	670.067	661.723	692.018	639.795	697.327	653.181	679.029	663.946	690.459	664.161	703.025	664.214	703.226	646.766	713.171	639.855	713.833	638.101	715.024	615.059	727.709	651.803	710.994	636.185	714.979
627.687	710.001	638.047	707.058	640.084	706.379	642.976	704.146	646.001	701.032	651.764	695.952	655.897	700.346	655.036	698.116	656.993	699.006	664.802	686.678	663.561	678.052	664.937	676.545	664.039	670.401	661.906	692.582	639.824	698.104	653.958	678.976	664.309	690.915	663.41	703.01	663.942	703.755	645.93	713.102	639.023	713.82	637.287	714.949	614.856	727.057	650.938	710.904	635.319	715.024
627.069	710.206	637.374	707.049	639.763	706.916	642.925	704.917	645.904	701.69	651.127	695.834	655.498	699.905	654.958	697.371	657.016	698.278	665.443	686.947	663.452	678.848	664.941	677.348	664.021	671.191	662.394	692.876	639.89	698.88	654.707	679.049	664.886	691.148	663.004	703.486	663.342	704.035	645.095	713.02	638.304	714.045	636.497	714.972	614.034	726.988	650.071	710.846	634.989	715.601
626.327	710.238	637.099	707.51	639.131	707.118	642.251	705.061	645.394	702.03	650.906	695.253	654.975	699.64	654.539	696.948	656.412	698.048	665.818	687.361	663.438	679.652	665.032	678.156	664.076	671.952	662.834	693.233	639.967	699.654	655.065	679.5	664.993	691.854	662.604	703.902	662.543	703.971	644.26	712.937	637.867	714.538	635.99	715.325	613.192	727.02	649.22	710.935	634.486	716
625.582	710.214	636.667	707.958	639.026	707.812	641.96	705.587	645.011	702.5	650.49	694.773	655.029	698.893	653.758	696.972	656.125	697.548	666.179	687.766	663.497	680.452	664.873	678.855	664.753	672.069	663.079	693.779	640.044	700.428	655.306	680.042	665.702	691.953	662.214	704.304	662.148	704.374	643.425	712.862	637.564	715.034	635.863	716.014	613.056	726.311	649.054	711.652	634.006	716.429
624.838	710.158	636.04	708.151	638.348	707.95	641.574	706.018	645.031	703.254	649.75	694.584	654.845	698.287	653.026	696.879	655.7	697.182	666.691	688.061	663.666	681.228	664.272	679.084	665.227	672.54	663.678	693.944	640.117	701.203	656.015	680.119	665.931	692.546	661.815	704.772	661.75	704.822	642.588	712.812	636.739	714.948	635.059	716.034	612.461	725.987	648.458	711.955	633.993	717.317
624.096	710.093	635.277	708.124	638.104	708.497	640.998	706.26	644.757	703.789	648.972	694.603	654.452	697.868	652.888	696.214	655.247	696.838	666.952	688.592	664.031	681.837	663.755	679.513	665.461	673.285	664.122	694.451	640.18	701.978	656.086	680.829	666.389	692.894	661.271	705.114	661.119	705.018	641.755	712.843	636.06	715.189	634.962	716.755	611.624	725.992	647.633	711.969	633.755	717.966
623.354	710.024	634.516	708.05	637.686	708.974	640.916	706.998	644.313	704.183	648.264	694.89	653.963	697.592	652.4	695.906	654.981	696.309	667.454	688.887	664.741	681.957	663.488	680.268	665.555	674.081	664.254	695.133	640.205	702.755	656.643	681.054	667.005	693.187	660.448	705.068	660.336	704.968	641.202	713.203	635.822	715.785	634.419	717.028	610.77	726.06	647.115	712.284	633.034	718.148
622.611	709.955	633.757	707.963	636.94	709.15	640.127	707.032	643.946	704.609	648.006	695.492	653.693	697.076	651.938	695.575	654.428	696.059	667.818	689.322	665.002	682.579	663.347	681.067	665.582	674.882	664.01	695.738	640.096	703.511	657.03	681.468	667.415	693.859	659.627	704.965	660.069	705.537	640.815	713.726	635.337	716.135	633.991	717.415	610.091	725.874	646.816	712.883	632.947	718.97
621.868	709.901	632.996	707.885	636.119	709.088	639.979	707.711	643.484	704.962	647.709	695.969	653.223	696.767	651.754	694.967	654.14	695.565	668.194	689.745	665.009	683.336	663.273	681.877	665.551	675.684	663.4	696.014	639.687	703.941	657.046	682.241	667.578	694.663	658.804	704.904	659.585	705.891	640.296	714.059	634.888	716.518	633.75	717.987	609.959	725.126	646.046	713.026	632.05	718.978
621.124	709.879	632.235	707.841	635.302	708.99	639.472	708.03	643.12	705.406	647.055	696.086	652.847	696.361	651.052	694.88	653.726	695.147	668.679	690.06	664.929	684.136	663.237	682.689	665.469	676.481	663.053	696.468	639.101	704.125	656.945	683.024	667.639	695.483	658.211	705.195	658.887	705.959	639.462	713.973	634.613	717.063	633.028	718.076	609.211	725.028	645.187	712.946	631.984	719.849
620.462	709.984	631.48	707.861	634.483	708.903	638.978	708.358	642.704	705.798	646.873	696.8	652.532	695.899	650.928	694.188	653.099	694.954	668.977	690.58	664.869	684.937	663.239	683.502	665.297	677.253	663.048	697.174	639.019	704.82	657.033	683.759	667.641	696.305	657.81	705.675	658.238	706.115	638.628	713.906	633.957	717.239	632.99	718.867	609.034	724.343	645.087	713.699	632.024	720.751
619.998	710.355	631.068	708.338	633.667	708.905	638.794	708.989	642.292	706.194	646.893	697.568	652.026	695.672	650.406	693.789	652.334	695.014	669.461	690.858	664.885	685.732	663.282	684.314	664.951	677.88	662.844	697.739	639.02	705.578	657.569	684.014	667.584	697.125	657.357	706.023	657.928	706.709	638.142	714.312	634.012	718.064	632.971	719.649	608.471	724.076	644.444	714.088	631.335	720.956
619.78	710.958	630.721	708.753	633.15	709.237	638.006	709.014	641.904	706.616	646.973	698.346	651.8	695.033	649.658	693.761	652.081	694.469	669.985	691.255	665.543	685.956	663.37	685.122	664.213	677.931	662.378	698.105	638.603	705.929	657.984	684.374	667.451	697.933	656.558	705.966	658.044	707.517	637.738	714.789	633.875	718.781	632.506	719.985	607.89	723.652	643.614	714.171	630.98	721.568
619.265	711.326	630.362	709.133	632.872	709.799	637.203	709.029	641.476	706.999	647.062	699.123	651.229	694.686	649.034	694.095	651.654	693.954	670.368	691.851	665.865	686.439	663.518	685.92	663.782	678.539	662.028	698.515	638.112	706.21	657.992	685.143	667.191	698.683	656.029	706.336	657.586	707.903	637.15	715.003	633.362	719.106	631.992	720.318	607.55	722.916	642.747	714.121	631.002	722.458
618.548	711.508	629.955	709.499	632.238	710.012	636.987	709.621	641.093	707.427	647.137	699.901	650.474	694.586	649.003	694.876	651.017	693.734	670.496	692.634	666.281	686.821	663.82	686.666	663.534	679.28	661.609	698.883	637.994	706.855	658.031	685.89	666.52	698.992	655.713	706.834	657.206	708.323	636.409	715.029	633.009	719.538	631.905	721.111	607.438	722.065	641.88	714.038	631.062	723.365
617.81	711.604	629.619	709.901	631.423	709.948	636.532	710.026	640.673	707.821	647.072	700.673	649.714	694.672	648.325	694.973	650.344	693.913	670.497	693.431	666.766	687.145	664.44	686.956	663.393	680.068	661.223	699.28	637.316	706.948	658.699	686	666.111	699.415	655.273	707.213	656.81	708.76	635.959	715.489	633.027	720.338	632.002	721.926	607.42	721.206	641.014	713.949	630.708	723.929
617.066	711.646	629.17	710.256	631.098	710.454	635.743	710.08	640.28	708.229	646.539	700.951	649.066	695.048	647.956	695.479	649.959	694.482	670.37	694.216	667	687.71	664.891	687.319	663.297	680.864	660.837	699.682	637.091	707.487	658.986	686.498	666.038	700.101	654.849	707.618	656.253	709.049	635.591	715.932	632.821	721.032	632.092	722.741	607.493	720.349	640.148	713.867	630.097	724.241
616.321	711.658	628.967	710.795	630.659	710.824	634.922	709.992	639.896	708.661	646.095	701.291	648.898	695.685	647.865	696.235	649.604	694.865	669.952	694.791	667.577	687.924	665.136	687.858	663.231	681.663	660.432	700.072	636.721	707.911	659.29	686.981	665.86	700.726	654.497	708.091	655.46	708.966	635.143	716.324	632.006	721.031	632.06	723.551	607.725	719.528	639.28	713.815	629.848	724.896
615.577	711.639	628.991	711.502	630.185	711.18	634.102	709.902	639.429	709.058	645.91	701.87	648.494	696.055	647.927	697.035	649.163	695.264	669.415	695.169	667.871	688.427	665.825	687.97	663.202	682.465	660.091	700.472	636.015	708.014	659.988	687.072	665.375	701.116	653.995	708.403	655.093	709.428	634.747	716.752	631.252	721.09	631.625	723.969	608.313	719.103	638.419	713.888	629.125	725.087
614.833	711.581	628.636	711.954	629.963	711.831	633.305	709.968	638.624	708.953	645.238	701.97	647.955	696.313	648.021	697.832	648.972	695.861	668.958	695.455	668.286	688.811	665.931	688.671	663.195	683.267	659.717	701.025	635.249	707.962	659.999	687.849	665.01	701.55	653.683	708.968	654.685	709.924	634.305	717.162	630.945	721.604	631.061	724.224	608.81	718.692	638.079	714.472	629.015	725.863
614.099	711.454	628.154	712.267	630.067	712.647	633.056	710.546	638.16	709.317	645.071	702.571	647.888	697.068	648.1	698.63	648.944	696.56	668.656	695.953	668.758	689.146	666.509	688.913	663.206	684.068	659.112	701.344	635.078	708.56	660.637	687.998	664.549	701.923	652.954	708.992	654.032	710.102	633.95	717.657	630.528	722.001	630.943	724.913	608.972	718.045	637.599	714.886	628.233	726.161
613.445	711.174	627.984	712.815	629.489	712.908	632.637	710.956	637.765	709.778	644.622	702.89	647.975	697.841	648.096	699.428	648.553	696.978	668.139	696.26	669.04	689.686	666.893	689.351	663.239	684.87	658.342	701.41	634.626	708.881	660.985	688.435	664.179	702.358	652.304	709.159	653.219	710.037	634.02	718.461	629.721	722.005	630.205	724.989	609.06	717.326	636.858	714.979	627.33	726.148
612.969	710.723	627.979	713.51	629.098	713.392	631.84	710.987	637.217	710.028	644.13	703.177	648.062	698.614	647.742	699.906	648.034	697.333	667.994	696.866	669.582	689.898	667.195	689.869	663.308	685.669	657.573	701.318	634.147	709.177	661.24	688.964	663.763	702.793	651.872	709.593	652.407	709.947	633.637	718.971	629.001	722.127	630.044	725.628	609.591	716.931	636.216	715.17	626.421	726.066
612.902	710.07	627.648	714.009	629.001	714.092	631.092	711.026	636.467	710.004	644.004	703.843	648.056	699.364	647.134	700.122	647.915	698.006	667.93	697.565	670.108	690.362	667.842	690.038	663.433	686.461	657.05	700.811	634.008	709.821	661.94	689.048	663.168	703.028	651.493	710.045	651.592	709.896	633.113	719.299	628.946	722.892	629.54	725.997	609.982	716.482	635.878	715.724	625.512	725.974
612.249	709.964	627.162	714.272	628.886	714.737	631.034	711.802	636.039	710.424	643.315	703.931	647.848	700	646.998	700.803	647.977	698.796	667.59	698.074	670.426	691.033	667.976	690.725	663.64	687.231	656.787	700.296	633.341	709.935	661.999	689.766	662.416	703.016	650.672	709.956	651.117	710.312	633.039	719.971	628.257	723.034	628.764	726.051	610.438	716.096	635.32	716.009	624.604	725.939
611.511	709.994	626.817	714.674	628.325	715.031	630.358	711.953	635.676	710.939	643.041	704.48	647.121	700.039	647.043	701.596	648.065	699.586	667.049	698.307	670.554	691.822	668.562	690.922	664.06	687.797	656.398	699.914	633.095	710.47	662.582	689.975	662.035	703.489	650.104	710.262	650.745	710.813	632.912	720.694	627.976	723.587	627.951	725.969	610.913	715.65	635.046	716.605	624.141	726.364
610.77	710.071	626.468	715.089	627.97	715.569	630.052	712.475	635.01	711.045	643.001	705.212	646.977	700.676	646.561	701.916	648.123	700.378	666.762	698.815	670.588	692.624	669.091	691.347	664.629	688.141	655.903	699.566	632.717	710.874	663.334	690.004	661.611	703.934	649.786	710.802	650.179	711.06	632.394	721.085	627.58	724.028	627.145	725.96	611.021	714.937	634.49	716.911	623.762	727.022
610.027	710.13	625.922	715.343	628.013	716.354	629.681	712.924	634.203	710.961	642.915	705.848	646.551	701.034	646.13	702.294	647.733	700.888	666.323	699.177	670.537	693.426	669.407	692.031	664.949	688.544	655.862	698.791	632.159	711.096	663.931	690.178	660.904	703.993	649.213	711.018	649.366	710.997	631.594	721.027	626.976	724.258	627.071	726.692	611.187	714.291	634.127	717.418	622.999	727.438
609.334	710.01	625.992	716.102	627.683	716.818	629.082	713.154	633.461	710.986	642.23	705.957	645.98	701.24	645.877	702.833	647.24	701.228	665.884	699.536	670.377	694.211	669.493	692.836	665.415	688.893	655.943	698.011	632.039	711.756	664.001	690.892	660.298	704.174	648.48	711.067	648.563	710.932	631.018	721.311	626.89	725.005	626.486	727.019	611.699	713.887	633.665	717.811	622.109	727.624
608.985	709.576	625.835	716.705	627.139	717.186	628.917	713.883	632.948	711.397	642.033	706.579	645.939	701.967	645.223	702.973	646.988	701.726	665.593	700.042	669.952	694.786	669.466	693.647	665.807	689.306	656.04	697.233	631.435	711.928	664.699	690.969	659.898	704.637	647.956	711.404	648.1	711.335	630.751	721.914	626.113	725.054	625.704	727.061	612.244	713.444	633.19	718.232	621.203	727.732
608.833	708.999	625.426	717.098	626.73	717.731	629.019	714.702	632.669	711.889	642.021	707.315	645.211	701.991	645.071	703.608	647.007	702.468	665.021	700.296	669.414	695.169	669.286	694.435	666.2	689.703	656.121	696.453	631.108	712.377	664.986	691.507	659.463	705.086	647.732	712.055	647.755	711.89	630.072	722.004	626.041	725.759	624.887	726.987	612.281	712.6	632.97	718.897	620.292	727.798
608.096	709.018	624.822	717.321	626.765	718.531	629.038	715.518	632.217	712.246	641.813	707.854	644.467	702.023	644.558	703.881	646.666	702.998	665.052	701.016	668.963	695.475	668.761	694.867	666.633	690.071	656.133	695.684	630.808	712.85	665.031	692.256	658.644	705.014	646.945	712.095	647.149	712.156	629.361	722.115	626	726.553	624.152	727.031	611.762	712.049	632.958	719.662	619.38	727.835
607.381	708.993	624.717	718.061	627.338	718.953	628.609	715.908	631.815	712.646	641.199	708.045	644.005	702.338	644.149	704.273	646.156	703.274	664.909	701.708	668.624	695.944	668.247	695.237	667.076	690.509	655.842	695.017	630.197	713.009	665.124	692.902	657.826	704.935	646.123	712.027	646.334	712.157	628.892	722.53	625.587	727.014	624.069	727.755	611.203	711.748	632.397	719.99	618.467	727.824
607.01	708.623	624.964	718.696	627.807	719.312	628.112	716.25	631.431	713.077	641.053	708.672	643.868	702.969	643.871	704.799	645.802	703.702	664.425	702.084	668.124	696.288	667.997	695.781	666.999	691.295	655.288	694.822	630.055	713.638	665.818	692.977	657.243	705.195	645.3	711.94	645.519	712.1	628.581	723.059	624.796	727.07	623.487	728.232	610.823	711.238	631.948	720.511	617.554	727.787
606.886	708.008	625.456	719.059	628.213	719.724	627.976	716.962	630.905	713.431	640.511	708.908	643.152	703.022	643.229	704.923	645.406	704.113	663.656	702.051	668	696.92	668.06	696.577	667.283	691.781	654.935	694.389	629.547	713.888	666.249	693.565	656.835	705.666	644.534	711.979	644.706	712.019	627.748	722.964	624.039	727.083	622.742	728.509	610.247	710.974	631.985	721.336	616.644	727.72
606.15	708	626.02	719.243	628.624	720.145	628.031	717.78	630.961	714.239	640.141	709.311	642.997	703.659	642.917	705.578	644.927	704.455	663.069	702.248	667.912	697.602	667.547	696.922	667.791	692.147	654.626	693.803	629.133	714.259	666.45	694.296	656.387	706.041	643.944	712.324	643.893	711.935	627.106	723.213	623.991	727.839	621.939	728.666	609.476	710.934	632.069	722.202	615.739	727.605
605.997	707.411	626.108	719.921	629.065	720.523	627.377	717.947	631.054	715.045	639.868	709.805	642.978	704.406	642.873	706.342	645.021	705.245	662.856	702.896	667.532	698.076	667.123	697.353	668.289	692.606	653.922	693.483	628.988	714.912	666.491	695.081	655.57	705.946	643.794	713.027	643.079	711.864	626.821	723.797	623.383	728.309	621.125	728.767	608.931	710.572	631.776	722.793	614.851	727.402
605.658	707.008	626.706	720.081	629.42	720.989	626.976	718.452	630.875	715.693	639.253	709.954	642.783	704.959	642.944	707.141	644.778	705.816	662.325	703.289	667.028	698.366	667	698.007	668.463	693.384	653.154	693.332	629.052	715.681	666.432	695.864	655.107	706.341	643.041	713.111	642.263	711.828	626.256	724.027	622.609	728.563	620.307	728.834	608.686	709.931	631.278	723.213	614.205	726.923
605.03	706.896	627.051	720.502	629.892	721.338	627.216	718.845	630.427	716.125	639.085	710.568	642.05	704.993	643.039	707.938	644.28	706.156	661.545	703.399	666.71	698.841	666.896	698.665	668.482	694.184	652.378	693.231	628.5	715.927	666.223	696.62	654.744	706.868	642.217	713.06	641.504	711.923	625.496	724.066	621.786	728.696	619.487	728.853	607.831	710.029	631.01	723.781	613.796	726.286
604.988	706.199	627.28	721.031	630.261	721.784	627.756	719.179	629.932	716.45	638.603	710.868	641.903	705.73	643.125	708.736	643.9	706.595	660.764	703.336	666.234	699.201	666.421	699.037	668.398	694.978	651.596	693.168	628.186	716.347	665.619	696.927	654.132	707.086	641.395	712.975	640.934	712.332	624.947	724.393	620.955	728.773	618.666	728.854	607.157	709.802	631.039	724.595	613.243	725.926
604.439	706.006	628.038	720.985	630.687	722.186	628.043	719.709	630.018	717.257	638.173	711.226	641.908	706.497	643.096	709.531	643.928	707.386	660.099	702.967	665.961	699.715	665.997	699.47	668.09	695.649	650.813	693.134	627.9	716.859	665.203	697.318	653.312	707.024	640.572	712.896	640.737	712.937	624.776	725.103	620.122	728.815	617.846	728.835	606.824	709.241	630.52	725.119	612.333	725.986
604.031	705.677	628.754	721.047	631.134	722.554	628.629	719.96	629.765	717.843	637.928	711.771	641.985	707.271	642.611	709.881	644.022	708.175	659.95	702.298	665.983	700.464	666.029	700.232	667.561	696.103	650.028	693.134	627.314	717.275	664.862	697.737	652.495	706.928	639.755	712.867	640.052	713.02	623.943	725.141	619.287	728.826	617.027	728.785	606.272	708.981	629.662	725.003	611.425	726.084
603.913	705.057	629.044	721.523	631.478	722.996	628.906	720.508	629.202	718.156	637.321	711.918	642.075	708.044	642.172	710.275	644.093	708.967	659.483	701.972	665.665	701.001	665.762	700.77	666.943	696.268	649.245	693.177	626.542	717.363	664.343	698.016	651.675	706.864	639.065	713.134	639.24	712.95	623.108	725.09	618.453	728.802	616.211	728.695	605.481	708.95	629.155	725.335	610.516	726.166
603.219	704.977	629.299	722.027	632.148	723.297	629.384	720.852	628.774	718.616	636.974	712.473	642.145	708.819	641.999	710.899	643.939	709.651	658.991	701.669	665.103	701.263	665.307	701.167	666.995	697.065	648.465	693.25	625.765	717.394	664.099	698.531	651.094	707.239	638.877	713.779	638.495	713	622.274	725.006	617.621	728.736	615.402	728.56	604.908	708.603	628.747	725.861	609.606	726.16
602.496	704.975	630.033	722.062	632.406	724.031	629.796	721.259	628.778	719.373	636.871	713.185	642.06	709.571	642.062	711.679	643.526	710.103	658.863	701.007	665	701.898	664.968	701.648	667.068	697.862	647.691	693.365	624.987	717.396	663.628	698.9	650.769	707.743	638.315	713.995	637.93	713.342	621.439	724.928	616.795	728.624	614.622	728.32	604.719	707.951	628.094	726.107	609.026	725.67
602.046	704.709	630.031	722.815	632.494	724.842	630.132	721.737	629.155	720.008	636.926	713.964	641.613	709.929	641.476	711.938	642.963	710.31	658.112	700.962	664.916	702.599	665.075	702.454	666.967	698.577	646.931	693.542	624.21	717.38	662.964	699.005	650.372	708.147	637.537	714.023	637.752	713.954	620.637	724.942	615.986	728.442	614.138	727.803	604.052	707.78	627.229	726.049	608.668	725.139
601.948	704.063	630.03	723.563	632.461	725.66	630.678	722.008	629.836	720.12	637.016	714.741	641.089	710.173	641.146	712.405	643.034	711.098	658.001	700.288	664.563	703.101	664.649	702.91	666.595	699.082	646.239	693.882	623.432	717.349	662.312	699.076	649.898	708.497	636.957	714.298	637.174	714.199	619.973	725.211	615.258	728.123	613.767	727.28	603.826	707.14	626.364	725.955	608.159	724.725
601.334	703.709	630.321	724.023	632.268	726.427	630.961	722.569	630.085	720.681	637.1	715.518	641.035	710.904	640.737	712.792	642.872	711.768	657.989	699.518	663.992	703.299	664.225	703.288	665.961	699.232	646.046	694.527	622.655	717.303	662.014	699.596	649.634	709.042	636.866	715.017	636.839	714.687	619.871	725.955	615.003	727.427	613.27	727.002	603.158	706.995	625.531	725.941	607.741	724.264
600.628	703.558	631.03	724.088	631.802	727.035	631.454	722.848	630.515	721.067	637.113	716.296	640.307	710.956	640.278	713.138	642.416	712.116	657.707	699.013	663.763	703.873	663.828	703.716	666.027	700.027	645.64	694.896	621.879	717.253	661.541	699.932	649.063	709.286	636.12	715.098	636.449	715.117	619.152	726.164	614.519	727.085	612.477	727.055	602.392	706.913	625.006	726.375	607.17	723.856
599.887	703.526	631.314	724.77	631.125	727.143	632.003	723.258	631.056	721.343	636.817	716.81	640.028	711.479	639.991	713.656	641.936	712.411	657.008	698.92	663.285	704.187	663.333	704.05	665.895	700.717	645.102	695.141	621.103	717.199	660.84	699.95	648.77	709.815	635.918	715.719	635.923	715.412	618.319	726.19	613.784	727.046	612.063	726.588	601.92	706.507	624.689	726.983	606.653	723.272
599.145	703.573	631.397	725.513	630.899	727.738	632.387	723.895	631.18	722.035	636.274	717.098	639.996	712.219	639.46	713.928	641.768	713.031	656.997	698.132	662.885	704.607	662.541	703.964	665.46	701.097	644.961	695.85	620.327	717.139	660.233	700.139	648.321	710.18	635.426	716.059	635.732	716.038	617.481	726.151	613.217	726.789	611.672	726.124	601.609	705.971	623.933	727.103	606.471	722.385
598.431	703.769	631.298	726.25	630.435	728.082	632.505	724.705	631.919	722.118	635.992	717.626	639.939	712.893	639.135	714.409	641.108	713.158	656.341	697.991	662.518	705.062	662.058	704.351	664.945	701.373	645.026	696.622	619.551	717.078	659.93	700.703	647.889	710.582	634.972	716.414	635.098	716.217	616.645	726.087	612.842	726.298	611.02	726.012	600.765	706.011	623.067	727.043	606.424	721.476
598.115	704.292	630.986	726.863	629.974	728.438	632.496	725.529	632.029	722.792	636.052	718.384	639.233	712.97	638.72	714.785	640.879	713.721	656	697.537	661.72	704.999	661.715	704.83	664.797	702.033	644.547	696.9	618.775	717.016	660.04	701.485	647.521	711.05	635.005	717.228	634.827	716.742	615.81	726.01	612.367	725.961	610.348	725.899	600.035	705.852	622.201	726.963	606.477	720.567
597.822	704.802	630.297	726.963	629.783	729.137	632.328	726.333	632.067	723.565	635.719	718.83	639.031	713.564	638.254	715.125	640.454	714.09	655.724	697.019	661.13	705.222	661.327	705.215	664.115	702.16	644.091	697.253	618	716.954	659.624	701.889	646.705	710.964	634.931	718.007	634.387	717.114	614.975	725.93	612.061	725.452	609.909	725.463	599.878	705.141	621.442	727.05	606.663	719.685
597.284	705.049	630.102	727.518	629.024	729.438	631.836	726.866	632.391	724.062	635.261	719.182	639.005	714.296	637.952	715.68	639.938	714.37	655.043	696.908	660.871	705.829	660.936	705.647	663.869	702.725	643.972	697.963	617.224	716.892	659.24	702.283	646.107	711.233	634.166	718.062	633.972	717.502	614.139	725.859	611.569	725.053	609.562	725.018	599.204	705.005	620.948	727.5	607.14	718.96
596.543	704.966	629.699	727.881	628.216	729.583	631.316	727.224	633.088	724.2	634.972	719.666	638.842	714.876	638.04	716.476	639.806	715.036	654.984	696.175	660.396	706.289	660.576	706.257	663.449	703.109	644.052	698.743	616.448	716.834	658.86	702.7	645.81	711.788	633.948	718.67	634.009	718.295	613.302	725.802	610.831	725.025	609.086	724.653	598.402	704.951	620.686	728.22	607.948	718.869
595.802	704.923	629.177	728.129	627.398	729.669	630.887	727.602	633.401	724.925	634.452	719.918	638.171	714.981	637.619	716.852	639.117	715.148	654.361	696.005	659.617	706.456	659.807	706.506	662.932	703.389	643.442	698.896	615.672	716.777	658.386	703.061	645.256	712.02	633.485	719.023	633.816	718.959	612.465	725.779	610.241	724.806	608.723	724.244	597.933	704.537	619.854	728.466	607.957	718.047
595.236	705.101	629.082	728.752	626.576	729.705	630.531	728.09	633.489	725.725	634.097	720.391	638.02	715.634	637.188	717.26	638.875	715.7	654.026	695.548	658.815	706.495	659.007	706.636	662.79	704.043	642.998	699.341	614.895	716.729	657.602	702.962	644.511	712.055	632.677	719.025	633.204	719.154	611.648	725.861	609.846	724.334	608.226	723.873	597.661	703.949	618.995	728.595	608.068	717.211
595.008	705.664	628.531	729.204	625.753	729.7	630.072	728.38	633.463	726.532	633.996	721.049	638.012	716.371	636.98	717.857	638.461	716.088	653.74	695.039	658.018	706.407	658.197	706.706	661.999	704.025	642.807	700.05	614.118	716.688	657.176	703.323	643.958	712.36	631.974	719.142	632.886	719.656	610.966	726.178	609.41	723.957	607.703	723.409	596.949	703.788	618.128	728.66	608.699	716.92
594.511	705.936	627.845	729.468	624.93	729.666	629.761	729.034	633.299	727.314	633.929	721.702	637.759	716.86	637.021	718.614	637.957	716.371	653.04	694.944	657.316	706.104	657.385	706.728	661.291	704.114	642.812	700.833	613.341	716.653	656.796	703.804	643.771	713.037	631.957	719.93	632.515	720.1	610.927	726.956	609.006	723.504	607.475	722.628	596.872	703.002	617.258	728.669	609.067	716.378
593.853	705.978	627.094	729.591	624.111	729.593	629.106	729.406	632.915	727.922	633.395	721.992	637.183	717.058	636.508	718.931	638.024	717.157	653.024	694.164	656.992	705.526	656.572	706.704	660.935	704.567	642.87	701.615	612.563	716.64	656.273	704.134	643.001	713.087	631.238	720.164	631.969	720.365	610.163	727.003	608.589	723.148	607.383	721.814	596.144	702.883	616.389	728.626	609.541	715.937
593.26	706.095	626.331	729.643	623.299	729.465	628.311	729.602	632.153	727.996	633.099	722.472	637.003	717.698	636.108	719.372	637.889	717.872	652.372	694.013	656.722	705.022	655.763	706.624	660.657	705.172	642.941	702.397	611.786	716.659	655.484	704.112	642.182	713.018	630.426	720.21	631.839	721.104	609.346	727.031	608.032	722.751	607.36	720.994	595.908	702.272	615.526	728.525	610.059	715.54
592.979	706.621	625.567	729.629	622.525	729.219	627.495	729.714	632.046	728.677	632.668	722.795	637.03	718.449	636.01	720.032	637.324	718.111	652.021	693.568	655.927	705.081	654.968	706.457	659.928	705.476	643.019	703.177	611.014	716.733	654.698	704.03	641.364	712.93	629.6	720.175	631.087	721.376	608.964	727.488	607.648	722.127	607.395	720.176	595.401	701.933	614.696	728.322	610.379	714.944
592.525	706.857	624.807	729.567	622.077	728.718	626.673	729.784	631.496	728.933	632.216	723.153	636.688	718.863	635.904	720.68	636.914	718.492	651.78	692.944	655.152	705.009	654.291	706.087	659.139	705.611	643.097	703.958	610.335	716.944	653.912	703.945	640.58	712.949	628.776	720.11	630.287	721.496	608.684	728.114	607.507	721.311	607.498	719.365	594.959	701.519	613.996	727.895	611.057	714.706
592.043	707.228	624.057	729.44	621.865	728.052	625.848	729.823	631.11	729.341	631.885	723.699	636.196	719.155	635.425	721.052	636.687	719.058	651.092	692.622	654.954	704.353	653.95	705.505	658.341	705.683	643.167	704.74	609.975	717.493	653.125	703.891	639.923	713.252	627.953	720.028	629.472	721.523	607.929	728.381	607.474	720.478	607.718	718.599	594.647	700.969	613.943	727.093	611.22	713.959
591.653	707.76	623.354	729.211	621.209	727.64	625.023	729.826	630.865	729.959	631.942	724.478	636.031	719.762	635.064	721.47	635.989	719.145	650.298	692.58	654.968	703.562	653.681	704.979	657.541	705.71	643.202	705.523	609.606	717.888	652.428	703.994	639.817	713.947	627.13	719.945	628.658	721.478	607.094	728.399	607.516	719.646	608.156	717.963	593.804	700.964	613.188	726.941	612.057	713.876
591.514	708.488	623.046	728.606	620.399	727.501	624.197	729.804	630.208	730.371	632.034	725.254	635.408	719.927	634.646	721.851	636.001	719.903	649.539	692.758	654.756	703.028	652.972	704.866	656.739	705.696	643.166	706.304	608.979	717.973	651.959	704.42	639.111	713.986	626.307	719.867	627.856	721.348	606.317	728.149	607.654	718.824	608.879	717.874	593.011	700.924	612.324	726.987	612.379	713.054
591.508	709.232	622.683	728.152	619.58	727.427	623.373	729.76	629.407	730.494	632.102	726.033	635.117	720.42	634.243	722.249	635.931	720.641	649.116	693.252	654.033	702.941	652.919	704.11	655.94	705.639	642.849	706.836	608.342	718.083	651.674	704.946	638.354	714.072	625.482	719.799	627.117	721.033	606.064	727.496	608.073	718.205	608.999	717.215	592.964	700.106	611.458	727.077	612.399	712.149
591.592	709.967	622.127	727.961	618.757	727.406	622.551	729.691	628.597	730.526	631.974	726.685	634.754	720.837	633.848	722.65	635.548	721.067	648.813	693.775	653.829	702.196	652.284	703.936	655.148	705.509	642.253	707.084	607.952	718.531	651.009	705.023	637.895	714.474	624.657	719.76	626.992	720.319	605.602	727.119	608.688	717.862	609.048	716.451	592.319	699.681	610.591	727.153	612.136	711.308
591.836	710.61	621.366	728.024	617.936	727.441	621.732	729.588	627.787	730.49	631.448	727.044	634.213	721.072	633.439	723.031	634.984	721.276	648.253	693.954	653.811	701.401	651.877	703.449	654.424	705.206	642.012	707.642	607.575	718.909	650.223	704.953	637.68	715.061	623.841	719.802	626.52	719.827	605.119	726.765	609.231	717.476	609.401	715.96	591.493	699.478	609.739	727.135	611.415	711.053
592.367	711.02	620.604	728.079	617.123	727.55	620.925	729.413	626.989	730.37	631.105	727.44	634.045	721.675	632.994	723.446	635.013	722.055	647.942	694.584	653.856	700.598	651.767	702.664	654.071	704.64	642.045	708.393	607.193	719.303	649.497	704.979	636.98	715.173	623.091	720.022	625.773	719.583	604.873	726.158	609.464	716.683	610.122	715.817	590.639	699.389	609.022	726.853	611.08	710.479
592.85	711.284	620.193	727.71	616.341	727.785	620.231	729.037	626.283	730.102	630.695	727.82	633.503	721.88	633.022	724.192	634.923	722.792	647.958	695.347	653.927	699.797	651.788	701.851	653.78	704.12	641.714	708.842	606.808	719.695	648.971	705.347	636.861	715.862	623.034	720.773	624.963	719.491	604.164	726.06	609.574	715.856	610.388	715.051	589.78	699.37	608.965	726.059	610.57	710.076
592.996	711.823	619.834	727.229	616.03	728.444	619.953	728.402	626.071	729.443	630.321	728.21	633.119	722.302	632.79	724.76	634.403	723.068	648.038	696.141	654.011	698.996	651.852	701.04	653.126	703.985	641.237	709.174	606.419	720.08	648.711	705.852	636.293	716.105	622.38	720.94	624.147	719.472	603.711	725.397	609.624	715.023	610.472	714.239	588.922	699.415	608.177	725.978	610.083	709.644
593.012	712.498	619.377	726.815	615.598	728.819	619.592	727.878	625.617	728.893	629.988	728.636	632.982	722.965	632.364	725.165	633.997	723.431	647.9	696.755	654.094	698.196	651.932	700.23	653.031	703.261	640.998	709.705	606.027	720.462	648.272	706.204	635.926	716.551	622.061	721.45	623.334	719.544	603.524	724.6	609.634	714.189	610.448	713.423	588.071	699.535	607.992	725.295	609.723	709.089
593.339	712.972	618.62	726.731	615.182	729.235	618.815	727.76	624.933	728.583	629.551	729.139	633.054	723.724	631.949	725.535	634.002	724.202	647.308	696.987	654.163	697.394	652.014	699.421	652.437	703.07	640.438	709.929	605.653	720.861	647.859	706.582	635.609	717.051	621.711	721.93	622.555	719.751	603.498	723.767	609.601	713.356	610.272	712.644	587.285	699.852	607.415	725.006	609.098	708.799
593.865	713.238	617.856	726.726	614.968	729.871	618.043	727.97	624.139	728.427	628.806	729.252	632.454	723.913	631.563	725.956	633.921	724.947	646.937	697.542	654.203	696.591	652.097	698.612	652.01	702.631	640.156	710.405	605.256	721.237	647.539	707.047	634.966	717.228	621.081	722.129	622.109	720.251	603.614	722.945	609.514	712.529	609.85	712.082	587.067	700.549	606.822	724.584	608.877	708.108
594.067	713.763	617.092	726.747	615.011	730.641	618.023	728.776	623.333	728.332	628.026	729.273	632.105	724.385	631.151	726.344	633.253	725.066	646.913	698.291	654.166	695.794	652.173	697.802	651.872	701.907	639.772	710.823	604.867	721.621	646.982	707.325	634.88	717.966	621.024	722.9	621.81	720.797	603.944	722.263	609.33	711.726	609.103	712.008	586.545	700.917	606.533	723.787	608.124	707.949
593.999	714.505	616.329	726.786	614.466	730.963	617.397	728.967	622.524	728.272	627.245	729.248	632.006	725.048	630.755	726.752	633.033	725.587	646.99	699.086	653.947	695.112	652.228	696.99	651.932	701.108	639.16	711.025	604.509	722.035	647.017	708.059	634.19	718.102	620.268	722.97	621.246	721.006	604.6	721.949	608.939	711.013	609.033	711.248	585.76	700.977	606.431	722.926	608.03	707.146
593.914	715.246	615.566	726.84	614.12	731.438	616.593	728.97	621.713	728.242	626.464	729.199	631.984	725.731	630.363	727.155	633.024	726.348	647.062	699.88	653.227	695.005	652.232	696.177	652.028	700.311	638.383	710.934	604.08	722.378	646.858	708.695	633.913	718.655	620.051	723.569	621.055	721.64	604.917	721.489	608.185	710.939	609.047	710.445	585.172	701.201	606.428	722.057	607.238	706.989
594.175	715.804	614.804	726.9	613.675	731.801	616.057	729.249	620.901	728.242	625.685	729.131	631.394	725.965	629.963	727.547	632.834	726.999	647.06	700.649	653.063	694.392	652.091	695.396	652.109	699.513	638.093	711.458	603.724	722.799	646.465	709.127	633.51	719.079	619.596	723.951	620.498	721.882	605.396	721.126	608.033	710.305	608.603	710.073	584.935	701.836	606.517	721.192	606.343	707.035
594.619	716.151	614.042	726.962	613.23	732.196	615.891	729.915	620.09	728.274	624.906	729.06	631.121	726.466	629.583	728.038	632.079	727.053	646.496	700.909	652.57	694.099	651.588	695.022	652.119	698.715	637.668	711.817	603.34	723.184	645.955	709.392	632.942	719.333	618.831	724.007	620.11	722.348	605.802	720.694	607.999	709.503	608.099	709.744	584.221	702.149	606.791	720.38	606.058	706.41
595.05	716.447	613.28	727.023	612.971	732.783	615.147	729.98	619.281	728.341	624.127	728.987	630.698	726.826	628.826	727.998	631.307	727.044	646.035	701.357	652.139	693.741	651.041	694.761	651.851	698.138	637.258	712.182	602.932	723.547	645.711	709.942	632.825	720.031	618.127	724.08	620	723.051	606.209	720.271	607.656	708.983	607.908	709.115	583.362	702.089	607.457	720.076	605.48	706.069
594.96	717.186	612.518	727.082	613.053	733.59	615.008	730.684	618.478	728.449	623.349	728.914	630.255	727.16	628.278	728.216	630.989	727.491	645.83	702.017	651.934	693.141	650.943	694.042	651.219	697.915	636.95	712.661	602.594	724.033	645.205	710.223	632.019	720.012	618.029	724.808	619.959	723.751	606.652	719.879	607.004	708.808	607.178	709.021	582.507	701.995	607.884	719.598	605.106	705.552
595.159	717.781	611.755	727.132	612.531	733.936	615.012	731.48	617.697	728.655	622.569	728.848	630.041	727.693	627.89	728.677	630.697	728.024	645.834	702.814	651.229	692.953	650.252	693.72	651.06	697.315	636.448	712.944	601.851	723.979	644.842	710.646	631.248	720.081	617.353	724.986	619.331	723.987	607.037	719.429	606.944	708.044	607.049	708.345	581.651	701.906	607.964	718.84	604.69	704.931
595.568	718.14	610.991	727.167	612.157	734.376	614.648	731.921	617.13	729.129	621.789	728.792	629.489	728.047	627.473	729.169	629.955	728.181	645.886	703.611	650.435	693.027	649.49	693.807	650.54	696.861	636.133	713.416	601.266	724.178	644.513	711.1	630.928	720.578	616.562	724.981	619.102	724.55	607.485	719.047	606.162	708.004	606.51	708.048	580.797	701.889	608.147	718.199	603.918	704.572
596.062	718.371	610.228	727.171	611.739	734.773	614.116	732.211	616.79	729.657	621.008	728.753	628.77	728.101	626.678	729.245	629.161	728.142	645.961	704.406	650.112	692.576	649.105	694.314	649.836	696.739	635.722	713.789	600.856	724.577	643.962	711.327	630.572	721.082	616.113	725.331	618.601	724.921	607.902	718.607	605.367	707.97	605.751	708.003	580.189	702.174	608.765	717.911	603.016	704.455
596.233	718.942	609.511	727.086	611.309	735.164	613.948	732.851	616.456	730.094	620.228	728.754	627.995	728.033	625.877	729.22	628.369	728.069	646.04	705.201	649.768	692.011	648.768	694.807	649.237	697.021	635.289	714.137	600.561	725.037	643.755	711.905	629.779	721.206	615.807	725.868	617.892	725.013	608.32	718.231	604.999	707.512	605.137	707.836	579.88	702.758	609.03	717.258	602.106	704.449
596.737	719.17	609.051	726.675	610.933	735.607	613.243	732.958	615.938	730.406	619.485	728.857	627.222	727.949	625.076	729.166	627.578	727.986	646.115	705.996	649.119	691.699	648.205	695.036	648.929	697.621	635.008	714.632	600.082	725.336	643.274	712.189	628.956	721.175	615.112	726.027	617.254	725.122	608.844	717.85	604.668	707.017	604.968	707.184	579.259	703.015	608.928	716.394	601.201	704.543
597.106	719.534	608.793	726.075	610.482	735.978	613.079	733.606	615.698	730.967	618.999	729.332	626.445	727.899	624.276	729.1	626.787	727.908	646.175	706.793	648.33	691.797	647.947	695.693	648.479	697.912	634.506	714.911	599.748	725.778	642.896	712.613	628.137	721.1	614.291	725.958	616.993	725.696	609.347	717.315	604.029	706.827	604.298	707.056	578.406	702.934	609.509	716.078	600.343	704.79
597.328	720.048	608.302	725.663	610.105	736.422	612.551	733.904	615.17	731.24	618.716	729.837	626.138	728.394	623.476	729.027	625.996	727.86	646.212	707.59	648.035	692.442	648.022	696.491	648.075	698.378	634.166	715.351	599.359	726.165	642.543	713.088	627.318	721.017	614.082	726.57	616.43	726.044	609.568	716.512	603.987	706.041	604.091	706.453	578.073	703.494	609.883	715.567	600.003	705.52
597.913	720.203	607.566	725.471	609.675	736.82	612.115	734.3	614.819	731.694	618.167	730.003	625.745	728.873	622.677	728.953	625.223	727.973	646.165	708.385	647.614	692.79	647.609	696.851	647.994	699.06	633.784	715.75	598.92	726.504	641.757	713.09	626.499	720.934	613.582	726.968	615.655	726.023	609.677	715.681	603.186	705.995	603.606	706.115	577.585	703.843	610.348	715.189	599.526	706.008
598.147	720.709	606.809	725.36	609.281	737.235	611.85	734.867	614.439	732.124	617.468	730.035	625.166	729.164	621.877	728.89	625.032	728.577	645.735	708.861	647.103	693.149	647.056	697.213	647.876	699.686	633.337	716.085	598.62	726.981	640.973	712.993	625.679	720.857	612.846	727.069	614.842	725.956	609.72	714.845	602.381	705.993	603.151	705.747	577.142	704.293	610.928	714.814	598.679	706.016
598.511	721.093	606.047	725.307	608.901	737.683	611.157	735.008	613.932	732.432	616.962	730.375	624.389	729.167	621.075	728.863	624.609	729.007	645.264	709.242	646.633	693.711	646.685	697.841	647.404	700.048	633.026	716.564	598.147	727.293	640.188	712.91	624.859	720.796	612.023	726.998	614.248	726.156	609.716	714.007	602.034	705.525	602.913	705.158	576.98	704.994	611.372	714.168	597.769	705.948
599.058	721.295	605.283	725.283	608.401	738.087	611.053	735.721	613.686	733.002	616.713	730.916	623.613	729.103	620.392	729.032	623.876	729.137	644.99	709.734	646.416	694.484	646.631	698.649	646.97	700.478	632.563	716.87	597.787	727.696	639.462	712.993	624.037	720.779	611.246	726.998	613.93	726.698	609.663	713.171	601.7	705.022	602.223	704.955	576.913	705.704	611.51	713.314	597.199	706.285
599.198	721.876	604.519	725.285	607.583	738.003	610.444	735.974	613.126	733.256	616.077	730.995	622.838	729.029	619.926	729.48	623.082	729.089	645.06	710.516	646.294	695.28	646.766	699.446	647.009	701.234	632.164	717.291	597.398	728.096	638.909	713.337	623.263	720.975	611.068	727.642	613.414	727.088	609.542	712.343	600.886	704.993	601.41	705.037	576.346	706.021	611.499	712.445	596.787	706.903
599.765	722.096	603.755	725.313	606.765	737.925	609.667	735.992	612.802	733.744	615.404	731.083	622.063	728.958	619.73	730.152	622.291	729.011	644.609	710.932	646.218	696.081	647.281	699.835	646.759	701.747	631.978	717.888	596.901	728.439	638.788	713.979	622.991	721.564	610.565	728.167	612.613	727.041	609.297	711.562	600.066	705.025	601.112	704.534	575.929	706.565	611.31	711.601	596.15	707.37
600.246	722.475	602.995	725.386	606.203	738.221	609.132	736.242	612.393	734.143	614.912	731.425	621.287	728.902	618.998	730.415	621.499	728.941	644.198	711.316	646.17	696.884	647.874	700.191	646.288	702.124	632.005	718.618	596.961	729.214	638.177	714.167	622.601	721.987	609.846	728.458	611.8	726.975	608.786	710.948	600.038	704.223	600.69	704.071	575.998	707.398	610.751	711.084	595.261	707.55
600.453	723.181	602.243	725.513	605.799	738.667	608.89	736.839	611.91	734.463	614.701	731.968	620.509	728.892	618.212	730.549	620.708	728.926	643.798	711.706	646.141	697.688	648.329	700.728	645.844	702.589	631.511	718.958	597.05	729.986	637.867	714.649	622.029	722.235	609.033	728.586	611.254	727.212	608.127	710.811	599.398	703.971	599.978	703.909	576.074	708.254	610.229	710.716	594.352	707.617
600.502	723.923	601.544	725.759	605.4	739.066	608.217	737.02	611.682	735.035	614.195	732.23	620.138	729.346	617.412	730.604	620.11	729.142	643.397	712.107	646.13	698.492	648.533	701.513	645.801	703.387	631.154	719.379	596.919	730.632	637.53	715.096	621.937	722.957	608.209	728.636	610.92	727.755	607.858	710.248	598.583	703.989	599.162	703.988	575.75	708.817	609.804	710.287	593.44	707.61
600.457	724.663	600.962	726.177	604.918	739.48	607.399	736.959	611.103	735.252	613.847	732.678	619.785	729.883	616.61	730.605	620.025	729.855	642.993	712.497	646.155	699.297	648.657	702.317	645.839	704.187	631.057	720.006	596.525	731.09	636.95	715.292	621.149	723.003	607.383	728.63	610.459	728.317	607.389	709.885	597.755	704.049	598.347	704.089	575.273	709.236	609.369	709.844	592.532	707.53
600.281	725.362	600.899	726.854	605.023	740.296	607.086	737.474	610.812	735.797	613.429	733.033	619.286	730.313	615.809	730.557	619.401	730.261	642.608	712.908	646.193	700.1	648.737	703.126	645.902	704.987	630.988	720.721	595.969	731.322	636.819	715.937	620.36	723.017	606.561	728.548	609.666	728.507	606.922	709.528	597.083	703.885	597.533	704.087	574.872	709.675	608.9	709.45	591.641	707.343
599.933	725.957	600.311	726.985	604.72	740.81	606.65	737.861	610.254	736.013	612.665	732.974	618.531	730.482	615.018	730.425	618.657	730.457	642.196	713.29	646.252	700.903	648.785	703.938	645.979	705.785	630.536	721.28	596.03	732.063	636.24	716.136	620.027	723.489	605.763	728.356	608.857	728.604	606.671	708.952	597.013	703.114	597.123	703.647	574.384	710.05	608.538	708.946	591.012	706.794
599.224	725.98	599.576	727.011	604.23	741.199	606.177	738.199	609.511	736.043	612.086	733.23	617.756	730.544	614.331	730.099	617.869	730.532	641.806	713.694	646.338	701.703	648.811	704.751	646.061	706.583	629.77	721.413	595.87	732.697	635.905	716.582	619.678	723.961	605.193	727.905	608.042	728.64	605.978	708.816	596.27	703.006	596.744	703.198	574.029	710.551	608.002	708.619	590.784	706.105
599.027	726.523	598.959	727.202	603.901	741.726	605.933	738.768	608.938	736.334	611.808	733.736	616.979	730.558	613.965	729.545	617.076	730.535	641.422	714.104	646.465	702.497	648.817	705.564	646.137	707.382	628.998	721.376	595.485	733.127	635.6	717.061	618.892	724.007	604.808	727.372	607.225	728.619	605.856	708.106	595.458	703.022	596.253	702.895	573.537	710.916	607.675	708.076	590.016	706.041
598.731	726.971	598.911	727.899	603.952	742.545	605.304	738.909	608.753	736.951	611.418	734.127	616.202	730.529	613.732	728.997	616.284	730.471	640.984	714.461	646.662	703.276	648.798	706.377	646.187	708.182	628.373	721.087	594.977	733.371	634.967	717.216	618.096	724.004	604.455	726.95	606.414	728.535	605.243	707.883	595.078	702.586	596.044	702.304	573.143	711.377	607.178	707.724	589.239	705.876
598.038	727.023	598.285	728.076	604.054	743.362	604.933	739.527	608.183	737.2	610.925	734.422	615.429	730.451	612.937	729.016	615.515	730.279	640.632	714.906	647.113	703.83	648.738	707.188	646.187	708.983	627.967	720.55	594.747	733.968	634.855	717.895	618.026	724.741	603.977	726.564	605.621	728.348	604.906	707.382	594.727	702.083	595.445	701.985	572.705	711.801	606.788	707.224	588.862	705.325
598.017	727.742	597.535	728.07	604.11	744.182	604.871	740.303	607.843	737.675	610.72	735.001	614.669	730.298	612.193	728.945	615.12	729.742	640.209	715.279	647.717	704.149	648.643	707.995	645.978	709.652	627.757	719.899	594.08	734.016	634.282	718.116	617.421	724.977	603.637	726.138	605.06	727.83	604.523	706.924	593.988	701.968	594.674	702	572.278	712.224	606.191	706.981	588.403	704.888
597.51	727.989	596.774	727.991	603.824	744.794	604.943	741.125	607.472	738.113	610.156	735.22	614.143	729.855	611.973	728.36	614.764	729.227	639.81	715.676	648.235	704.527	648.49	708.79	645.507	710.105	627.064	719.611	593.415	734.102	633.907	718.532	616.631	725.001	603.046	725.79	604.781	727.276	603.941	706.665	593.171	702.017	594.212	701.71	571.874	712.695	605.43	706.916	587.917	704.459
596.793	728.01	596.014	727.913	603.356	745.191	605.036	741.945	606.933	738.374	609.837	735.682	613.849	729.264	611.583	727.856	614.225	728.972	639.433	716.097	648.428	705.303	648.212	709.524	644.995	710.381	626.304	719.434	592.937	734.438	633.637	719.058	616.078	725.239	602.644	725.199	604.391	726.878	603.806	705.956	593.049	701.311	593.891	701.149	571.348	713.089	604.916	706.52	587.508	703.954
596.073	727.991	595.301	728.015	602.899	745.534	605.114	742.766	606.76	738.997	609.49	736.11	613.48	728.777	610.834	727.728	613.434	729.051	638.988	716.455	648.5	706.104	647.716	710.101	645.04	711.141	625.529	719.313	592.749	735.074	632.935	719.165	615.939	725.915	602.51	724.392	603.899	726.549	603.063	705.856	592.511	700.83	593.329	700.652	570.497	712.98	604.61	705.945	586.637	703.949
596.034	728.692	594.994	728.487	602.567	746.027	605.099	743.587	606.148	739.191	608.949	736.337	612.719	728.638	610.078	727.939	613.126	728.568	638.634	716.882	648.502	706.907	647.106	710.235	644.822	711.746	624.751	719.217	592.003	735.084	633.009	719.948	615.168	726.005	602.509	723.568	603.675	725.999	602.874	705.202	591.758	700.626	592.538	700.446	569.653	712.808	603.747	706.028	585.973	703.706
595.554	728.997	594.744	729.019	602.003	746.331	604.549	743.909	605.847	739.696	608.771	736.93	611.943	728.665	610.029	728.703	612.742	728.024	638.176	717.258	648.43	707.705	646.829	710.772	644.401	712.159	623.97	719.139	591.229	735.014	632.931	720.682	614.366	725.986	602.632	722.754	602.959	725.813	602.35	704.889	590.94	700.662	591.726	700.34	568.808	712.647	603.118	705.758	585.836	702.889
594.853	729.047	594.008	729.151	602.021	747.083	604.14	744.354	605.427	740.1	608.245	737.175	611.288	728.967	609.472	728.945	612.162	727.639	637.986	717.836	648.219	708.448	646.376	711.134	643.936	712.483	623.187	719.088	590.456	734.929	632.526	721.091	614.075	726.491	603.07	722.128	602.638	725.139	601.915	704.495	590.257	700.953	590.908	700.28	567.957	712.518	602.798	705.177	584.997	702.553
594.113	728.957	593.246	729.097	601.834	747.727	604.011	745.022	604.952	740.441	607.884	737.601	610.926	729.486	608.715	728.973	611.384	727.507	637.967	718.549	647.792	709.03	645.992	711.521	643.633	712.992	622.404	719.047	589.693	734.891	631.952	721.297	613.683	726.938	603.683	721.871	602.514	724.341	601.64	703.942	589.988	701.623	590.089	700.257	567.102	712.437	602.172	704.946	584.099	702.409
593.374	728.959	592.486	729.021	601.401	748.151	603.93	745.713	605.021	741.243	607.538	738.021	610.699	730.006	608.107	729.15	610.589	727.508	637.583	719.03	647.073	709.1	646.048	712.309	643.149	713.294	621.62	719.016	589.05	735.168	631.863	722.002	612.909	727.008	604.082	721.452	602.516	723.529	600.977	703.781	589.482	701.961	589.268	700.267	566.245	712.423	601.308	705.01	583.189	702.357
593.074	729.402	591.726	728.939	600.915	748.473	603.368	746.021	604.823	741.905	606.764	737.927	609.93	729.956	607.991	729.849	609.811	727.646	637.111	719.336	647.059	709.808	645.821	712.982	642.796	713.774	620.835	719	588.839	735.731	631.125	722.019	612.132	726.996	604.397	720.934	602.651	722.739	600.874	703.046	588.707	701.938	588.449	700.312	565.395	712.506	600.511	704.983	582.278	702.379
592.816	729.908	590.965	728.862	600.644	749.004	603.098	746.528	604.23	742.148	606.11	738.145	609.237	730.08	607.317	729.948	609.229	728.045	636.755	719.774	647.008	710.574	645.085	713.029	642.278	714.035	620.051	718.996	588.421	736.088	630.387	722.074	612.067	727.738	605.041	720.751	603.043	722.06	600.124	702.976	588.186	702.259	587.635	700.419	564.568	712.724	599.938	704.618	581.374	702.488
592.174	730.07	590.202	728.82	600.032	749.268	602.608	746.918	603.982	742.666	605.967	738.766	608.936	730.562	607.033	730.501	608.844	728.562	636.35	720.166	646.619	711.032	644.365	713.104	641.531	714.015	619.266	719.003	587.925	736.327	629.939	722.422	611.434	727.992	605.164	720.045	603.763	721.965	599.349	702.916	587.789	702.724	586.837	700.604	563.834	713.165	599.737	703.935	580.514	702.751
591.436	729.986	589.469	728.921	599.94	749.975	601.899	746.994	603.976	743.435	605.934	739.487	608.641	731.031	606.986	731.244	608.56	729.036	635.905	720.513	645.831	711.037	643.93	713.479	640.974	714.328	618.482	719.023	588.08	736.978	629.773	723.054	610.644	728.008	605.813	719.86	604.016	721.407	598.948	702.478	587.348	703.098	586.238	701.029	563.26	713.798	598.871	703.964	580.045	703.347
590.697	729.952	589.054	729.321	600.012	750.792	601.277	747.145	603.736	744.069	605.708	740.051	607.981	731.148	606.842	731.843	608.03	729.325	635.616	721.002	645.064	711.041	643.676	714.024	640.733	714.867	617.698	719.056	588.772	737.059	629.024	723.239	610.122	728.251	606.121	719.342	604.423	721	598.66	701.85	586.987	703.574	585.851	701.596	562.842	714.542	598.007	704.055	579.697	703.914
590.144	730.139	588.922	729.938	599.961	751.529	600.919	747.645	603.047	744.18	605.047	740.167	607.919	731.866	606.197	731.975	607.739	729.813	635.076	721.295	644.975	711.756	642.871	713.977	640.274	715.197	616.915	719.098	589.04	737.568	628.238	723.259	609.935	728.918	606.529	718.916	604.997	720.759	597.892	701.563	586.517	703.937	585.499	702.058	562.544	715.344	597.26	703.898	579.1	704.209
590.032	730.774	588.183	729.962	599.608	752.066	600.445	748.01	602.854	744.79	604.866	740.775	607.33	732.065	605.882	732.628	607.275	730.17	635.002	721.958	644.449	712.037	642.161	714.103	639.865	715.584	616.134	719.175	589.355	738.032	627.449	723.228	609.289	729.374	607.056	718.614	605.049	719.992	597.057	701.498	586.136	704.39	584.681	702.022	562.332	716.174	596.885	703.363	578.864	704.878
589.448	730.99	588.031	730.581	598.962	752.256	599.636	747.909	602.38	745.11	604.409	741.106	606.933	732.453	605.833	733.399	606.948	730.635	634.893	722.629	643.977	712.367	641.916	714.671	639.553	716.073	615.356	719.273	590.033	738.133	626.66	723.175	608.489	729.546	607.021	717.802	605.852	719.977	596.223	701.562	585.703	704.794	583.866	701.931	562.191	717.022	596.433	702.96	578.142	705.057
588.76	731.01	587.637	730.951	598.932	753.038	599.082	748.283	601.937	745.468	603.922	741.407	606.745	733.041	605.882	734.199	606.993	731.394	634.526	723.101	643.808	712.998	641.498	715.062	638.996	716.321	614.584	719.404	590.054	738.885	625.872	723.112	607.672	729.628	607.139	717.078	606.025	719.334	595.437	701.803	585.289	705.208	583.048	701.877	562.12	717.879	595.612	702.949	578.022	705.838
588.02	730.941	587.007	731.123	599	753.856	598.928	748.969	601.691	746.031	603.78	742.051	606.042	733.098	605.96	734.998	606.71	731.928	633.988	723.338	643.071	713.056	640.955	715.34	638.739	716.869	613.827	719.589	590.664	739.047	625.085	723.042	606.85	729.645	607.806	716.902	606.488	718.988	595.054	702.369	584.911	705.663	582.354	702.054	562.123	718.739	594.984	702.713	577.241	705.956
587.282	730.935	586.699	731.781	598.924	754.577	598.854	749.625	600.888	745.986	603.115	742.159	605.865	733.792	606.049	735.796	606.125	732.201	633.729	723.869	642.967	713.749	640.843	716.056	638.265	717.199	613.168	719.971	591.181	739.42	624.298	722.971	606.03	729.603	608.264	716.392	606.986	718.672	594.748	702.904	584.41	706.05	581.886	702.501	562.165	719.598	594.884	701.906	577.062	706.681
587.078	731.496	586.803	732.509	598.538	755.058	598.414	749.979	600.178	746.104	602.879	742.688	605.853	734.558	606.129	736.595	605.86	732.77	633.247	724.2	642.429	714.009	640.035	715.99	637.861	717.597	613.005	720.619	591.437	740.125	623.51	722.909	605.216	729.495	608.45	715.606	607.038	717.897	593.995	702.976	583.582	705.952	581.62	703.047	562.254	720.453	594.097	701.56	576.396	706.912
586.682	731.837	587.268	732.888	597.84	755.246	597.78	750.378	599.917	746.659	602.491	743.071	605.922	735.333	606.181	737.396	605.869	733.562	633.007	724.714	642.004	714.385	639.258	716.055	637.55	718.084	612.586	720.96	591.511	740.897	622.722	722.864	604.427	729.27	608.48	714.783	607.03	717.098	593.165	702.957	583.124	706.359	580.806	702.949	562.399	721.301	593.258	701.343	576.037	707.515
586.217	732.097	587.795	733.155	597.576	756.02	597.495	751.129	599.482	746.989	601.977	743.328	606.012	736.106	606.167	738.195	605.94	734.354	633.019	725.463	641.815	715.001	638.922	716.547	636.981	718.305	611.824	720.969	591.462	741.671	621.933	722.849	604.047	728.648	608.406	713.962	607.718	716.991	593.036	703.676	582.706	706.78	580.167	703.189	562.597	722.137	592.4	701.2	576.012	708.379
586.027	732.671	587.957	733.73	597.449	756.829	597.327	751.934	598.691	746.96	602.019	744.1	606.098	736.88	605.914	738.81	606.03	735.144	632.717	726.076	641.023	715.017	638.624	717.053	636.755	718.871	611.076	721.013	591.274	742.41	621.191	723.004	603.654	728.211	608.102	713.217	608.214	716.497	592.461	703.929	582.294	707.191	579.822	703.682	562.845	722.959	591.535	701.102	575.643	708.873
585.52	732.856	588.537	733.914	597.395	757.649	597.218	752.751	597.956	747.105	601.906	744.788	606.154	737.656	605.289	739.061	606.115	735.935	631.936	726.034	640.972	715.771	637.991	717.218	636.27	719.187	611.023	721.734	590.841	742.894	621	723.616	603.257	727.804	607.406	713.043	608.472	715.754	592.1	704.392	581.892	707.624	579.443	704.118	563.16	723.758	590.668	701.029	575.117	709.277
585.013	733.208	588.837	734.357	597.398	758.471	597.143	753.573	597.929	747.905	601.413	745.072	606.089	738.404	605.069	739.608	606.164	736.727	631.303	726.167	640.421	716.02	638.008	718.009	635.864	719.58	610.475	721.969	590.186	743.057	620.638	724.155	602.866	727.356	607.049	712.571	608.56	714.943	591.747	704.866	581.464	708.024	578.921	704.42	563.585	724.505	589.8	700.977	575.004	710.091
584.606	733.769	589.154	734.808	597.458	759.29	597.093	754.397	597.934	748.673	600.963	745.395	605.794	738.974	604.547	739.885	606.076	737.474	630.912	726.589	640.001	716.398	637.933	718.763	635.541	720.064	610.024	722.306	590.066	743.694	619.914	724.427	602.408	727.039	607.028	711.778	608.571	714.126	591.167	705.11	581.054	708.444	578.721	705.036	564.204	725.086	588.93	700.952	574.877	710.82
584.456	734.497	589.748	735.036	597.591	760.1	597.079	755.223	597.502	749.025	600.814	746.031	605.076	739.011	604.174	740.31	605.73	738.089	630.587	727.121	639.782	716.975	637.41	719.047	634.925	720.294	609.892	722.962	589.504	743.916	619.133	724.537	601.816	726.602	606.918	711.092	608.489	713.314	591.037	705.805	580.643	708.862	578.107	705.227	564.983	725.355	588.059	700.94	574.22	711.082
584.405	735.239	590.505	734.955	597.947	760.822	597.087	756.048	596.864	749.283	600.039	745.994	605.008	739.723	603.836	740.758	605.098	738.211	629.796	727.197	639.042	717.033	636.979	719.416	635.014	721.089	609.151	723.002	589.131	744.319	618.344	724.551	601.575	725.865	606.139	711.04	608.257	712.542	590.327	705.933	580.217	709.273	577.823	705.75	565.667	725.127	587.189	700.948	574.032	711.769
584.416	735.983	590.861	735.36	598.627	761.005	597.112	756.873	596.527	750.002	599.308	746.047	604.504	739.998	603.295	740.999	604.84	738.743	628.999	727.158	638.994	717.784	636.76	720.003	634.844	721.738	609.01	723.639	588.88	744.848	617.557	724.499	601.504	725.051	606.019	710.307	607.734	712.125	590.09	706.537	579.8	709.678	577.387	706.129	566.044	724.501	586.319	700.976	573.296	712.059
584.496	736.72	591.216	735.773	598.997	761.478	597.165	757.697	596.356	750.796	598.959	746.483	604.013	740.283	603	741.575	604.41	739.114	628.203	727.093	638.396	717.988	635.997	720.053	634.397	722.13	608.56	723.965	588.235	745.027	616.793	724.344	601.552	724.234	606.037	709.502	607.198	711.8	589.596	706.886	579.373	710.085	576.907	706.466	566.335	723.852	585.45	701.018	572.398	711.974
584.687	737.436	591.699	736.038	599.025	762.27	597.253	758.517	596.252	751.6	598.725	747.03	603.999	741.034	603.034	742.336	603.962	739.445	627.408	727.016	638.005	718.404	636.002	720.85	633.951	722.476	608.062	724.242	587.468	744.963	616.157	724.013	601.761	723.475	605.648	709.076	607.004	711.174	589.139	707.271	578.909	710.531	576.656	707.029	567.147	723.601	584.582	701.087	572.111	712.55
585.179	737.88	591.94	736.566	598.964	763.087	597.377	759.333	596.188	752.409	597.968	747.065	604.003	741.801	602.731	742.817	604.027	740.227	626.613	726.944	637.787	718.993	635.983	721.633	634.044	723.27	607.965	724.921	587.111	745.376	616.009	723.304	602.309	722.949	605.122	708.766	607.073	710.364	588.863	707.838	578.976	711.361	575.976	707.22	568	723.498	583.718	701.188	571.587	713.145
585.63	738.212	592.406	736.847	599.013	763.889	597.58	760.13	596.152	753.22	597.93	747.804	603.419	741.992	602.268	743.174	603.844	740.908	625.816	726.898	637.03	719.04	635.544	722.004	633.804	723.91	607.233	724.968	586.776	745.83	615.445	723.099	602.867	722.734	604.972	708.082	606.507	710.099	588.19	708.01	579.059	712.19	575.945	707.978	568.86	723.484	582.859	701.322	570.778	713.437
585.992	738.526	592.814	737.229	599.713	763.988	597.986	760.809	596.138	754.032	597.408	748.048	603.031	742.378	601.968	743.66	603.287	741.145	625.16	727.123	636.982	719.79	634.983	722.257	633.268	724.175	607.046	725.566	586.213	746.037	615.122	722.632	603.191	722.243	604.298	707.661	606.117	709.631	588.059	708.706	578.787	712.776	576.029	708.793	569.714	723.557	582.013	701.512	569.872	713.533
586.331	739.06	593.037	737.802	600.218	764.497	598.604	761.116	596.148	754.844	596.844	748.364	602.825	742.94	601.449	743.946	602.9	741.536	624.913	727.719	636.395	720	634.91	722.998	632.882	724.576	606.649	725.958	586.039	746.652	614.786	722.174	603.621	721.852	603.493	707.519	606.011	708.942	587.442	708.97	578.315	713.187	575.97	709.544	570.526	723.792	581.236	701.873	568.96	713.551
587.005	739.167	592.938	738.56	600.506	765.24	599.027	761.482	596.197	755.654	596.512	749.051	602.119	743.002	601.128	744.426	602.641	742.061	624.523	728.245	636.024	720.426	634.145	723.039	632.598	725.08	606.055	726.153	585.518	746.892	614.207	721.971	604.093	721.51	602.67	707.507	605.94	708.264	586.655	708.981	577.978	713.67	575.611	710.084	570.972	724.343	581.041	702.607	568.049	713.505
587.748	739.145	593.404	738.877	600.646	766.05	599.006	762.285	596.274	756.462	596.341	749.813	602.03	743.684	600.701	744.806	601.979	742.18	623.769	728.491	635.759	720.959	634.04	723.698	631.998	725.246	606.011	726.889	585.016	747.261	613.99	721.344	604.356	720.951	601.864	707.637	605.342	707.996	586.138	709.27	578.032	714.471	574.935	710.23	571.238	724.939	580.474	702.917	567.146	713.382
588.49	739.075	593.8	739.27	600.724	766.869	599.15	762.998	596.388	757.265	596.22	750.584	601.52	743.95	600.278	745.183	601.862	742.846	622.983	728.634	635.044	721.042	634.01	724.474	631.863	725.973	605.321	726.99	584.717	747.865	614.022	720.584	604.945	720.729	601.232	707.997	605.079	707.456	585.83	709.817	577.63	714.978	575.028	711.045	571.918	725.106	579.674	702.953	566.351	713.088
589.23	738.985	593.99	739.827	600.757	767.691	599.89	763.102	596.57	758.049	596.123	751.36	601.042	744.253	599.978	745.674	601.331	743.101	622.189	728.719	635.001	721.819	633.682	724.992	631.244	726.324	604.563	726.993	584.784	748.625	613.692	720.151	605.21	720.142	600.957	708.647	604.584	707.131	585.215	710.033	577.165	715.321	574.891	711.776	572.002	725.883	579.134	703.266	565.949	712.422
589.971	738.903	593.887	740.584	600.755	768.514	600.335	763.678	596.876	758.784	596.052	752.139	600.949	744.946	599.455	746.048	600.932	743.49	621.393	728.772	635.005	722.599	632.922	725.074	630.465	726.467	604.071	727.264	585.383	748.922	613.191	719.841	605.835	719.997	600.454	708.972	604.194	706.701	585.041	710.697	576.774	715.798	574.403	712.127	572.746	725.969	578.808	703.825	565.663	711.633
590.713	738.848	594.395	740.975	600.716	769.336	600.58	764.454	597.575	758.949	596.008	752.92	600.213	744.99	598.691	746.016	600.697	744.045	620.595	728.805	634.573	722.955	632.122	725.019	629.668	726.483	603.914	727.891	585.784	749.309	612.972	719.237	606.567	719.929	599.674	708.942	603.829	706.244	584.435	710.923	576.188	716.028	573.925	712.455	573.261	726.547	578.193	704.074	564.849	711.228
591.43	738.874	595.073	741.023	600.628	770.153	600.718	765.267	597.947	759.455	595.97	753.701	600.025	745.571	597.894	745.947	600.004	744.14	619.796	728.821	634.042	723.23	632.01	725.692	628.875	726.396	603.229	727.976	586.149	749.703	613.047	718.452	607.09	719.587	599.177	709.282	603.317	705.929	584.115	711.432	575.456	716.065	573.692	713.037	573.543	727.335	578.024	704.783	563.979	710.96
591.962	739.247	595.679	741.113	600.469	770.958	600.802	766.088	598.03	760.171	595.951	754.483	599.629	745.949	597.275	746.118	599.897	744.843	618.997	728.817	633.948	723.945	631.528	726.195	628.189	726.047	603.059	728.577	586.596	750.044	612.588	718.113	607.29	718.987	598.78	709.732	603.085	705.399	583.698	711.84	574.972	716.452	572.884	712.998	573.684	728.181	577.315	704.946	563.083	710.791
592.219	739.732	596.027	741.559	600.208	771.732	600.853	766.912	597.965	760.98	595.942	755.265	598.909	746.001	596.92	746.62	599.312	745.02	618.199	728.786	633.194	723.991	630.797	726.466	628.017	725.382	602.615	728.906	586.912	750.476	612.186	717.717	607.959	718.786	598.34	710.099	602.61	704.852	583.201	712.169	574.662	717.048	572.169	713.127	573.759	729.037	577.071	705.579	562.174	710.715
592.552	740.117	596.429	741.905	599.501	771.993	600.879	767.737	597.984	761.731	595.941	756.047	598.146	745.988	596.474	746.942	598.555	745.035	617.402	728.74	633.049	724.62	629.991	726.559	627.573	725.033	602.108	729.177	587.331	750.886	611.882	717.243	608.029	718.081	597.993	710.578	601.908	704.562	582.948	712.748	573.884	717.069	571.902	713.68	573.789	729.897	576.524	705.893	561.264	710.744
593.042	740.371	596.8	742.295	599.149	772.443	600.874	768.562	598.61	761.907	595.955	756.829	598.031	746.648	596.123	747.398	597.966	745.253	616.607	728.672	633.031	725.388	629.178	726.574	626.793	725.017	602.015	729.877	587.951	751.016	611.312	717.028	608.121	717.373	597.525	710.93	601.102	704.451	582.322	712.918	573.054	716.983	571.448	714.056	573.781	730.757	576.091	706.356	560.366	710.884
593.246	740.931	597.174	742.681	598.711	772.815	600.84	769.387	599.142	762.396	595.978	757.611	597.552	746.919	595.712	747.774	597.913	746.001	615.815	728.572	632.769	725.951	628.369	726.496	626.058	724.961	601.297	729.951	588.616	751.055	611.094	716.471	608.534	716.935	597.144	711.371	600.288	704.428	581.981	713.533	572.224	716.898	570.64	714.059	573.719	731.616	575.993	707.124	559.499	711.146
593.857	741.005	597.568	743.047	598.263	773.189	600.777	770.209	599.469	763.086	596.013	758.392	597.016	747.216	595.274	748.151	597.17	746.044	615.03	728.423	632.038	726.079	627.596	726.279	626.032	724.192	601.06	730.506	588.972	751.499	610.629	716.152	609.201	716.694	596.727	711.776	599.474	704.48	581.972	714.318	571.456	716.972	569.826	713.957	573.593	732.466	575.867	707.807	558.691	711.545
594.527	741.057	597.96	743.44	597.97	773.7	600.681	771.029	599.65	763.874	596.06	759.173	596.731	747.902	594.934	748.663	596.381	745.974	614.3	728.133	631.241	725.997	627.144	725.784	625.4	723.988	600.684	730.91	589.365	751.956	610.218	715.778	609.432	715.909	596.306	712.178	598.682	704.664	582.053	715.151	570.883	717.377	569.009	713.879	573.368	733.293	575.224	708.05	557.973	712.093
595.072	741.316	598.332	743.775	597.412	774.067	600.524	771.838	599.77	764.677	596.118	759.953	596.686	748.678	595.034	749.459	595.603	745.96	614.047	727.52	631.071	726.58	626.829	725.226	624.61	723.99	600.103	731.116	590.02	752.045	609.925	715.284	609.49	715.091	595.913	712.61	598.155	705.148	581.867	715.774	570.708	717.914	568.245	714.018	572.868	733.852	574.973	708.715	557.383	712.783
595.222	741.885	598.807	744.122	596.611	773.998	600.208	772.585	599.854	765.484	596.19	760.731	596.69	749.455	594.633	749.84	594.962	746.179	613.725	726.951	630.627	727.064	626.246	724.976	624.052	723.788	599.926	731.797	590.794	751.965	609.383	715.024	609.441	714.274	595.474	712.996	597.796	705.687	581.287	716.075	570.044	718.171	567.947	714.562	572.293	734.225	575.045	709.573	556.958	713.591
595.678	742.154	599.312	744.565	595.794	773.928	599.611	772.93	599.893	766.295	596.293	761.506	596.72	750.233	594.133	750.231	594.951	746.955	613.024	726.671	629.912	727.319	625.437	725.056	623.982	723.044	600.005	732.569	591.527	751.942	609.128	714.524	609.213	713.517	595.087	713.434	597.335	705.999	580.973	716.639	569.623	718.784	567.606	715.026	571.931	734.666	574.505	709.908	556.647	714.446
596.083	742.487	599.545	745.29	595.213	774.185	599.142	773.296	599.914	767.107	596.424	762.277	596.765	751.01	593.803	750.808	594.242	746.9	612.229	726.633	629.111	727.387	625.133	724.56	623.304	722.66	600.041	733.345	591.955	752.381	608.726	714.011	608.725	713.023	594.658	713.836	596.555	705.958	581.068	717.465	569.403	719.58	566.887	715.19	571.394	735.01	574.118	710.406	556.416	715.327
596.274	743.047	599.684	746.04	594.835	774.659	598.892	773.852	599.918	767.919	596.604	763.034	596.825	751.786	593.758	751.605	593.479	746.937	611.459	726.804	628.306	727.397	624.732	724.005	622.541	722.454	599.788	733.867	592.296	752.831	608.121	713.72	608.037	712.912	594.259	714.254	596.022	706.33	580.621	717.881	569.282	720.404	566.435	715.853	571.083	735.526	574.042	711.16	556.261	716.226
597.013	742.986	599.783	746.797	594.39	774.945	598.178	773.981	599.901	768.73	596.869	763.763	596.891	752.562	593.793	752.407	592.919	747.302	611.109	727.337	627.502	727.388	624.105	723.656	621.75	722.333	599.181	734.044	592.863	752.973	607.394	713.831	608.12	712.107	593.86	714.691	595.718	706.836	580.212	718.309	569.216	721.235	566.178	716.631	570.578	735.942	573.844	711.83	556.179	717.135
597.656	743.097	599.846	747.559	593.871	775.444	598.062	774.682	599.852	769.541	597.522	763.916	596.959	753.338	593.854	753.207	592.695	748.039	610.764	727.824	626.697	727.363	623.299	723.614	620.951	722.263	599.014	734.69	593.569	752.991	607.03	714.406	608.032	711.321	593.351	715.042	595.274	707.205	579.828	718.77	569.193	722.07	565.998	717.431	569.818	735.981	573.138	712.074	556.139	718.046
598.082	743.434	599.875	748.323	593.716	776.215	597.48	774.956	599.775	770.349	598.049	764.333	597.026	754.113	593.923	754.007	592.677	748.833	610.137	727.993	625.893	727.325	622.5	723.733	620.15	722.231	599.029	735.444	594.095	753.388	606.667	714.861	607.543	710.776	592.53	714.945	594.856	707.606	579.226	719.049	569.223	722.904	565.873	718.241	569.231	736.226	572.323	712.012	556.148	718.959
598.217	744.022	599.878	749.087	593.682	777.035	596.71	774.983	599.663	771.152	598.386	764.965	597.088	754.889	593.996	754.806	592.724	749.626	609.345	727.936	625.09	727.28	622.085	724.297	619.348	722.25	598.691	735.868	594.006	754.15	606.052	714.982	606.805	710.488	592.09	715.38	594.52	708.082	578.402	718.95	569.298	723.734	565.789	719.057	568.823	736.71	572.052	712.611	556.203	719.87
598.84	744.148	599.864	749.851	593.697	777.857	596.137	775.202	599.485	771.942	598.534	765.732	597.138	755.666	594.067	755.606	592.802	750.417	609.083	728.496	624.287	727.228	621.722	724.801	618.548	722.304	598.197	736.156	594.192	754.732	605.38	715.063	605.993	710.408	591.684	715.801	593.974	708.35	578.09	719.484	569.432	724.556	565.739	719.876	568.266	736.994	571.495	713.022	556.294	720.778
599.11	744.604	599.828	750.614	593.736	778.679	595.894	775.805	599.152	772.632	598.621	766.509	597.165	756.444	594.125	756.407	592.897	751.206	608.635	728.837	623.484	727.172	621.148	725.004	617.753	722.402	598.055	736.768	594.582	755.138	604.942	715.482	605.175	710.471	591.279	716.216	593.716	708.899	577.627	719.955	569.669	725.345	565.726	720.696	567.436	736.912	570.695	713.027	556.422	721.681
599.424	745.032	599.763	751.376	593.794	779.501	595.251	775.93	598.589	773.109	598.662	767.29	597.127	757.216	594.136	757.209	592.996	751.995	608.216	729.202	622.681	727.113	620.439	725.05	616.976	722.573	597.414	736.995	595.05	755.437	604.614	715.919	604.408	710.746	590.869	716.634	593.23	709.223	576.918	720.076	570.095	725.987	565.78	721.515	566.921	737.44	569.838	712.883	556.602	722.576
600.117	745.127	599.653	752.132	593.863	780.321	594.86	776.555	598.08	773.327	598.677	768.071	596.9	757.825	593.824	757.774	593.088	752.785	607.927	729.712	621.879	727.052	620.018	725.461	616.271	722.871	596.671	736.984	595.328	755.929	604.193	716.287	604.095	711.37	590.453	717.042	592.837	709.644	576.084	719.986	570.908	726.004	565.883	722.328	566.967	738.261	568.984	712.715	556.824	723.461
600.366	745.823	599.487	752.876	593.935	781.142	594.724	777.333	597.758	773.819	598.666	768.853	596.264	757.968	593.283	758.14	593.149	753.577	607.377	729.932	621.076	726.99	619.664	726.027	616.021	723.532	596.182	737.226	595.818	756.237	603.802	716.686	603.689	711.827	590.042	717.456	592.48	710.104	575.251	719.899	570.999	726.74	566.048	723.128	566.693	738.779	568.129	712.55	557.096	724.332
600.507	746.548	599.195	753.546	594.008	781.962	594.709	778.157	597.312	774.19	598.628	769.634	595.797	758.495	592.716	758.496	593.117	754.364	607.04	730.467	620.274	726.928	618.945	726.174	615.571	723.886	595.941	737.793	595.991	756.782	603.43	717.102	603.044	711.977	589.635	717.871	591.955	710.399	574.436	719.896	571.577	726.99	566.3	723.901	566.134	739.168	567.272	712.397	557.457	725.169
600.564	747.289	598.737	754.065	594.081	782.782	594.739	778.982	596.876	774.563	598.54	770.41	595.562	759.19	592.469	759.254	592.816	754.917	607.002	731.183	619.471	726.867	618.134	726.166	614.898	723.959	595.333	738.097	595.988	757.505	602.992	717.455	602.313	712.014	589.211	718.274	591.691	710.957	573.989	720.431	571.973	727.426	566.681	724.617	565.636	739.73	566.413	712.261	557.985	725.899
600.559	748.033	598.082	754.157	594.151	783.602	594.799	779.805	596.555	775.058	598.364	771.167	595.47	759.961	592.365	760.049	592.136	755.047	606.831	731.745	618.669	726.808	617.323	726.109	614.273	724.103	594.568	738.049	596.308	758.1	602.64	717.893	602.017	712.589	588.805	718.678	591.179	711.252	573.611	720.795	572.271	727.954	567.319	725.099	565.417	740.555	565.547	712.177	558.736	726.078
600.463	748.77	598.005	754.796	594.214	784.423	594.866	780.628	596.004	775.333	597.984	771.746	595.448	760.737	592.315	760.849	592.038	755.723	606.302	732.034	617.866	726.752	616.513	726.032	613.946	724.629	593.789	737.959	597.07	758.026	602.223	718.265	601.523	712.896	588.383	719.081	590.823	711.738	573.101	721.206	572.974	728.103	568.087	725.289	565.316	741.41	564.678	712.136	558.952	725.444
600.248	749.468	597.957	755.503	594.257	785.245	594.942	781.451	595.725	775.813	597.435	772.121	595.503	761.513	592.309	761.651	591.466	755.935	605.882	732.556	617.063	726.699	615.705	725.946	613.476	724.938	593.009	737.899	597.689	758.165	601.83	718.659	601.163	713.353	587.89	719.499	590.328	712.038	572.723	721.832	573.376	728.8	568.893	725.274	565.279	742.269	563.809	712.145	559.478	725.052
599.835	749.949	597.699	756.037	594.278	786.068	595.019	782.273	595.21	776.158	597	772.441	595.675	762.265	592.347	762.452	591.094	756.355	605.883	733.329	616.259	726.655	614.895	725.869	613.133	725.398	592.278	737.958	598.099	758.557	601.463	719.08	600.755	713.765	587.97	720.321	589.56	712.014	572.594	722.657	573.497	729.62	569.7	725.139	565.296	743.129	562.948	712.25	560.354	725.037
599.115	749.974	596.981	756.103	594.245	786.887	595.095	783.095	594.814	776.677	597.047	773.181	596.088	762.793	592.43	763.249	590.812	756.86	605.957	734.124	615.455	726.615	614.084	725.81	612.716	725.784	592.024	738.56	598.379	759.089	601.013	719.414	600.309	714.137	588.06	721.143	588.956	712.297	572.542	723.494	573.529	730.453	570.461	725.028	565.366	743.985	562.116	712.482	560.907	724.7
599.007	750.637	596.711	756.758	594.045	787.61	595.167	783.917	594.711	777.474	596.818	773.737	596.616	763.144	592.605	764.03	590.169	756.991	606.046	734.918	614.651	726.592	613.272	725.793	612.295	726.166	591.565	738.837	599.154	759.04	600.682	719.872	599.966	714.614	587.822	721.754	588.754	712.888	572.542	724.333	573.486	731.285	570.977	725.357	565.515	744.829	561.344	712.856	561.247	724.113
599.03	751.358	596.621	757.504	593.543	788.092	595.231	784.741	594.709	778.285	596.376	774.13	596.969	763.507	592.932	764.746	589.634	757.53	606.118	735.712	613.846	726.586	612.51	725.897	611.954	726.627	591.135	739.231	599.926	758.951	600.267	720.232	599.48	714.95	587.35	722.165	588.25	713.188	572.557	725.171	573.346	732.101	571.296	725.854	565.835	745.593	560.667	713.379	561.873	723.83
599.086	752.098	596.701	758.246	593.024	788.364	595.272	785.565	594.745	779.096	595.924	774.491	597.379	763.885	593.455	765.061	589.331	758.24	606.117	736.507	613.042	726.599	611.949	726.32	611.473	726.942	590.884	739.845	600.607	759.058	599.869	720.63	599.123	715.416	586.958	722.585	587.863	713.608	572.585	726.009	573.028	732.793	571.761	726.222	566.382	746.105	560.113	714.04	562.082	723.125
599.057	752.837	596.987	758.936	593.041	789.107	595.279	786.39	594.798	779.906	596.016	775.268	597.787	764.269	593.968	764.816	589.144	759.011	605.632	736.894	612.239	726.642	611.716	726.86	611.135	727.403	590.945	740.626	601.091	759.426	599.483	721.055	598.687	715.804	587.057	723.399	587.533	714.087	572.625	726.847	572.318	732.941	572.174	726.612	567.032	746.279	559.7	714.806	562.878	722.94
598.417	752.957	597.691	758.996	592.834	789.743	595.202	787.205	594.864	780.716	595.755	775.768	598.178	764.64	594	764.053	589.026	759.796	605.193	737.29	611.46	726.817	611.248	727.205	610.72	727.786	591.044	741.405	601.243	760.056	598.7	720.96	598.27	716.209	586.698	723.949	586.958	714.329	572.672	727.685	571.808	733.495	572.561	727.038	567.177	747.022	559.43	715.631	563.786	723.032
598.085	753.37	598	759.481	592.393	790.162	594.868	787.801	594.936	781.525	595.291	776.134	598.572	764.988	594.711	763.722	588.969	760.589	604.999	737.861	611.075	727.358	610.846	727.623	610.299	728.164	591.102	742.186	602.006	759.978	598.15	721.245	597.899	716.659	586.207	724.26	586.752	714.942	572.725	728.522	571.578	734.255	573.215	727.343	567.865	747.163	559.238	716.477	563.927	722.286
597.858	753.877	598.039	760.21	591.92	790.488	594.315	788.139	595.01	782.333	594.835	776.554	599.167	765.349	595.487	763.576	588.977	761.384	605.005	738.591	610.682	727.791	610.508	728.094	609.949	728.612	590.876	742.761	602.681	760.101	597.797	721.691	597.415	717	585.83	724.718	586.187	715.203	572.781	729.359	571.492	735.083	573.476	728.113	568.109	747.78	559.099	717.335	564.551	721.747
597.217	753.966	597.967	760.971	591.637	791.029	594.037	788.618	595.084	783.142	594.732	777.323	599.447	766.03	596.286	763.555	589.036	762.175	604.53	738.977	610.254	728.131	609.957	728.352	609.49	728.96	590.359	743.101	603.109	760.486	597.45	722.115	597.1	717.483	585.336	725.042	585.836	715.662	572.843	730.195	571.483	735.916	573.599	728.921	568.687	748.142	559.023	718.201	565.399	721.492
597.012	754.551	597.992	761.724	591.09	791.298	593.505	788.923	595.151	783.951	594.732	778.104	599.602	766.788	597.075	763.645	589.156	762.958	604.142	739.372	609.989	728.683	609.726	728.922	609.144	729.402	590.052	743.546	603.312	761.051	596.954	722.406	596.64	717.894	584.562	725.027	585.444	716.095	572.905	731.032	571.555	736.744	573.645	729.739	569.534	748.203	559.012	719.071	566.303	721.39
596.977	755.245	598.502	761.964	590.76	791.775	593.147	789.388	595.212	784.761	594.76	778.886	599.687	767.561	597.823	763.888	589.352	763.723	603.745	739.765	609.439	728.93	609.215	729.216	608.727	729.817	589.589	743.876	603.941	761.205	596.69	722.927	595.956	717.997	583.992	725.315	584.923	716.417	572.969	731.868	571.749	737.55	573.632	730.558	570.393	748.157	559.03	719.94	567.214	721.371
596.885	755.843	599.067	762.257	590.302	792.162	592.722	789.786	595.257	785.572	594.806	779.666	599.726	768.338	597.955	764.603	589.65	764.454	603.34	740.157	609.146	729.42	608.839	729.651	608.13	730.019	589.222	744.288	604.162	761.765	596.212	723.238	595.306	718.122	583.757	725.938	584.955	717.227	573.033	732.704	572.353	737.959	573.559	731.374	571.25	748.08	559.089	720.808	568.124	721.427
596.268	755.953	599.448	762.881	589.951	792.638	592.281	790.173	595.271	786.383	594.866	780.446	599.712	769.116	598.463	764.883	590.161	765.043	602.942	740.551	608.731	729.822	608.479	730.107	607.397	730.011	588.859	744.712	604.576	762.123	595.832	723.648	594.921	718.6	583.075	726.075	585.054	718.038	573.097	733.541	572.801	738.335	573.408	732.18	572.106	747.99	559.198	721.671	569.017	721.585
595.83	756.452	599.624	763.625	589.974	793.418	591.933	790.652	595.231	787.193	594.933	781.225	599.65	769.892	599.174	764.939	590.828	765.416	602.557	740.962	608.098	729.988	607.946	730.391	607.024	730.491	588.356	745.017	605.068	762.402	595.487	724.095	594.487	718.966	582.254	726.01	584.89	718.737	573.158	734.377	573.214	738.744	572.998	732.838	572.962	747.898	559.333	722.531	569.741	721.973
595.571	757.102	599.736	764.381	589.69	793.979	591.424	790.965	594.902	787.852	595.003	782.004	599.531	770.659	599.828	765.094	591.58	765.552	602.144	741.344	607.336	729.948	607.707	730.969	606.606	730.861	587.58	744.926	605.207	763.047	594.967	724.372	594.106	719.408	581.433	725.919	584.423	719.12	573.219	735.214	573.626	739.161	572.344	733.058	573.819	747.825	559.507	723.383	570.128	722.634
595.464	757.836	599.816	765.141	589.015	794.207	591.081	791.464	594.329	788.131	595.072	782.784	599.322	771.392	600.111	765.734	592.332	765.428	601.752	741.752	606.965	730.511	607.16	731.235	606.222	731.274	587.088	745.306	605.968	763.004	594.702	724.874	593.69	719.81	580.634	725.907	583.98	719.457	573.274	736.051	574.015	739.572	572.015	733.513	574.679	747.793	559.726	724.225	570.64	723.007
595.439	758.58	599.875	765.903	588.742	794.846	590.633	791.803	593.998	788.565	595.138	783.563	598.862	771.955	600.009	766.529	592.96	764.996	601.366	742.158	607.002	731.269	606.82	731.706	605.832	731.686	586.936	745.951	606.661	763.101	594.188	725.198	593.277	720.214	579.986	726.22	584.027	720.255	573.325	736.888	574.42	740.14	572.02	734.31	575.493	747.916	559.991	725.053	571.542	722.923
595.486	759.322	599.914	766.667	588.889	795.581	590.093	792.178	594.011	789.344	595.198	784.343	598.259	772.141	600.433	766.853	592.999	764.237	600.967	742.547	606.748	731.774	606.435	732.126	605.411	732.062	586.9	746.618	607.087	763.473	593.923	725.727	592.875	720.63	579.802	726.807	583.838	720.937	573.37	737.726	575.238	740.21	571.866	735.007	576.015	748.353	560.314	725.857	571.989	723.474
595.612	760.051	599.923	767.431	589.376	796.079	589.632	792.749	593.832	790.033	595.251	785.123	598.037	772.629	600.974	767.225	593.511	763.803	600.575	743.016	606.282	732.141	605.923	732.414	605.033	732.483	586.476	746.958	607.278	764.054	593.99	726.513	592.463	721.036	579.245	727.106	583.238	721.135	573.404	738.564	576.07	740.181	571.095	735.048	576.201	749.003	560.732	726.613	572.442	723.911
595.872	760.692	599.914	768.195	590.032	796.224	589.464	793.554	593.138	790.142	595.276	785.905	598.046	773.373	601.391	767.821	594.269	763.597	599.828	742.991	605.949	732.653	605.714	732.986	604.623	732.871	585.905	747.336	608.043	764.085	594.088	727.297	592.041	721.443	578.838	727.611	582.914	721.625	573.435	739.402	576.901	740.112	570.965	735.742	577.014	749.055	561.355	727.196	572.901	724.386
596.463	760.976	599.888	768.959	589.957	797.039	589.412	794.376	592.886	790.709	595.262	786.686	597.848	774.046	601.56	768.603	595.057	763.504	599.273	743.211	606.051	733.452	605.07	733.21	604.221	733.275	585.647	747.989	608.814	764.01	593.786	727.877	591.641	721.837	578.761	728.429	582.511	722.029	573.431	740.241	577.732	740.028	570.44	736.04	577.033	749.901	561.867	726.825	573.357	724.795
596.864	761.353	599.848	769.722	590.086	797.789	589.447	795.199	592.451	791.096	595.15	787.428	597.084	774.035	601.628	769.402	595.851	763.485	598.878	743.656	605.64	733.852	604.911	733.874	603.819	733.665	585.609	748.762	609.588	763.927	593.268	728.184	591.179	722.244	578.782	729.255	581.72	722.019	573.401	741.078	578.562	739.941	569.968	736.391	577.747	750.045	562.171	726.218	573.958	725.22
597.014	761.92	599.765	770.482	590.611	798.101	589.583	796.008	591.924	791.385	594.767	788.009	596.375	774.083	601.641	770.204	596.642	763.546	598.462	744.104	605.175	734.253	604.964	734.682	603.399	734.037	585.752	749.499	610.336	763.929	592.974	728.637	590.933	722.838	578.844	730.08	581.013	722.133	573.314	741.909	579.393	739.856	569.779	737.02	578	750.626	562.796	726.017	574.41	725.898
597.023	762.594	599.645	771.237	591.062	798.459	589.931	796.677	591.776	792.045	594.186	788.202	595.952	774.427	601.599	771.004	597.4	763.734	597.666	744.068	604.93	734.83	605.059	735.49	602.935	734.468	586.264	750.007	611.018	764.125	593.011	729.391	591.004	723.656	578.925	730.903	580.906	722.855	573.045	742.648	580.225	739.794	569.013	737.059	577.932	751.465	563.573	725.938	574.6	726.786
597.458	762.894	599.467	771.976	591.313	799.016	590.474	797.12	591.083	792.15	594.009	788.747	595.78	775.023	601.485	771.795	597.891	764.176	596.873	743.978	605.017	735.63	605.116	736.29	602.968	735.239	586.794	750.241	611.088	764.807	592.752	730.004	591.08	724.469	579.011	731.726	580.286	723.07	572.549	743.155	581.059	739.792	568.638	737.758	577.908	752.306	564.09	725.544	574.691	727.693
597.985	763.25	599.203	772.679	592.12	798.989	591.007	797.367	590.884	792.744	593.978	789.468	595.013	774.939	601.256	772.545	598.09	764.813	596.078	743.903	605.093	736.43	604.825	736.969	603.045	736.036	587.148	750.661	611.611	765.055	592.195	730.212	590.642	724.929	579.093	732.549	579.476	723.032	571.976	743.33	581.741	740.072	568.468	738.546	578.181	753.033	564.345	724.948	574.718	728.605
598.376	763.78	598.587	772.981	592.856	799.096	591.293	797.929	590.384	793.064	593.722	790.05	594.249	774.799	600.68	772.982	598.732	764.943	595.393	744.023	604.674	736.883	604.226	737.175	602.895	736.67	587.484	751.108	612.042	765.395	591.864	730.677	590.158	725.297	579.167	733.372	578.664	722.937	571.745	743.955	582.174	740.568	568.413	739.363	578.911	753.366	565.017	724.762	574.688	729.518
598.577	764.494	598.211	773.351	593.07	799.695	591.807	798.24	589.838	793.408	593.106	790.201	593.48	774.721	600.174	773.29	598.924	765.552	594.919	744.457	604.226	737.27	603.879	737.621	602.44	737.081	588.008	751.333	612.189	766.01	591.452	731.043	590.006	725.917	579.224	734.197	577.855	722.867	571.161	744.209	582.457	741.061	568.438	740.181	579.731	753.189	565.184	724.031	574.584	730.424
598.692	765.23	597.846	773.717	593.526	800.046	592.18	798.694	589.705	794.174	592.848	790.726	592.726	774.782	600.022	773.868	599.387	765.886	594.651	744.97	604.016	737.816	603.543	738.083	601.975	737.439	588.225	751.95	612.938	766.046	590.688	731.007	589.918	726.616	579.226	735.023	577.099	723.06	570.828	744.675	583.04	741.33	568.556	740.988	579.897	752.465	565.958	723.975	574.387	731.315
598.768	765.971	597.401	774.058	594.014	800.373	592.56	799.132	589.975	794.918	592.44	791.11	592.02	775.055	599.963	774.573	599.85	766.217	593.929	744.931	604.033	738.563	602.968	738.304	602.046	738.209	588.88	752.088	613.317	766.648	590.06	731.208	589.51	727.087	578.981	735.772	576.932	723.716	570.383	745.073	583.279	741.869	568.852	741.741	580.417	751.994	566.712	723.877	573.835	731.971
598.813	766.715	597.135	774.482	594.174	801.065	593.058	799.446	590.712	795.009	591.918	791.374	591.563	775.662	599.576	775.071	600.052	766.806	593.256	745.107	603.589	739.069	602.826	738.995	601.791	738.777	589.659	752.04	613.532	767.385	589.843	731.792	589.046	727.405	578.408	736.081	576.452	724.037	569.772	745.422	583.852	742.185	569.534	741.95	581.202	751.838	567.074	723.35	573.132	732.184
598.829	767.46	596.714	774.95	594.97	801.244	593.299	800.067	590.965	795.546	591.765	791.979	591.274	776.365	599.081	775.332	600.691	766.953	592.908	745.625	602.82	739.025	602.073	739.009	601.366	739.178	590.438	751.947	613.65	768.152	589.329	732.071	588.687	727.926	577.947	736.43	575.925	724.38	569.479	746.198	584.153	742.786	569.863	742.43	582.061	751.852	567.477	722.762	573.039	732.92
598.814	768.205	596.104	775.204	595.791	801.269	594.109	800.02	590.984	796.327	591.092	792.144	591.108	777.118	598.761	775.843	600.925	767.517	592.957	746.387	602.268	739.233	601.352	739.091	600.945	739.536	591.219	751.872	613.711	768.927	588.548	732.046	587.998	728.007	577.724	737.031	575.758	725.158	569.333	747.023	584.171	743.615	570.254	742.851	582.92	751.904	568.301	722.518	572.903	733.735
598.774	768.949	595.341	775.221	596.613	801.246	594.74	800.187	591.171	796.957	590.695	792.683	591.03	777.89	598.172	776.016	601.357	767.855	592.706	746.916	601.875	739.673	600.938	739.505	600.604	740.06	591.865	752.139	613.719	769.705	587.763	731.949	587.348	728.146	576.987	737.114	575.768	725.975	569.253	747.857	584.111	744.448	570.795	743.141	583.778	751.97	569.164	722.429	572.357	734.127
598.708	769.69	594.577	775.178	597.434	801.193	595.1	800.685	591.921	797.015	590.524	793.429	591.027	778.667	597.456	776.06	601.92	768.14	592.125	747.195	601.449	740.129	600.673	740.082	599.829	739.993	592.157	752.656	613.684	770.482	586.977	731.879	586.911	728.569	576.908	737.853	575.824	726.789	569.214	748.694	584.025	745.278	570.938	743.782	584.636	752.042	570.033	722.433	571.902	734.567
598.608	770.428	593.816	775.108	598.255	801.124	595.494	801.244	591.993	797.744	590.494	794.208	591.089	779.442	596.925	776.388	602.374	768.718	591.829	747.771	600.649	740.154	599.866	740.13	599.255	740.208	592.495	753.091	613.6	771.255	586.281	732.049	586.559	729.097	576.272	738.048	575.897	727.603	569.218	749.532	583.933	746.107	571.6	744.128	585.494	752.108	570.895	722.545	571.52	735.083
598.428	771.15	593.055	775.031	599.075	801.049	596.264	801.518	592.574	797.967	590.58	794.983	591.212	780.208	596.708	776.942	602.518	769.498	591.79	748.562	599.847	740.089	599.056	740.055	598.861	740.653	593.069	753.311	613.453	772.014	585.915	732.503	585.739	729.06	575.675	738.463	575.979	728.417	569.266	750.369	583.851	746.938	572.389	744.201	586.354	752.152	571.686	722.85	570.955	735.415
598.044	771.74	592.295	774.954	599.895	800.973	597.074	801.673	592.947	798.398	590.863	795.691	591.415	780.954	596.196	777.224	602.57	770.289	591.833	749.359	599.047	740.005	598.248	739.967	598.461	741.093	593.203	753.933	613.168	772.727	585.666	733.014	584.922	728.965	575.275	739.171	576.064	729.229	569.364	751.201	583.81	747.771	573.207	744.169	587.213	752.142	571.965	723.526	570.667	736.065
597.537	772.111	591.534	774.881	600.715	800.9	597.892	801.778	593.206	798.959	591.435	796.001	591.727	781.656	595.834	777.662	602.55	771.082	591.908	750.155	598.246	739.921	597.438	739.893	597.663	741.077	593.776	754.145	612.525	772.935	584.941	733.108	584.103	728.885	575.004	739.949	576.142	730.043	569.53	752.022	583.946	748.547	574.025	744.101	587.799	751.829	572.415	723.942	569.77	736.137
596.977	772.247	590.771	774.829	601.536	800.843	598.715	801.845	593.985	799.03	591.99	796.225	592.369	781.946	595.477	778.107	602.446	771.865	591.988	750.949	597.445	739.858	596.654	739.916	596.867	740.979	594.012	754.658	612.131	773.34	584.797	733.874	583.382	729.02	574.804	740.75	576.201	730.858	569.877	752.77	584.366	749.114	574.842	744.018	588.103	751.185	572.939	724.282	568.861	736.046
596.837	772.857	590.01	774.829	602.358	800.812	599.539	801.888	594.787	798.975	592.026	796.967	592.825	782.313	594.947	778.383	602.223	772.606	592.068	751.744	596.642	739.845	595.986	740.163	596.069	740.908	594.024	755.397	612.031	774	584.767	734.658	582.875	729.443	574.655	741.564	576.219	731.674	570.572	752.981	585.03	749.23	575.658	743.929	588.664	750.664	573.177	724.914	567.955	735.932
596.366	773.117	589.366	775.007	603.176	800.84	600.364	801.916	594.944	799.613	592.757	797.014	593.005	782.877	594.714	778.956	601.621	772.961	592.14	752.54	596.088	740.233	595.93	740.905	595.384	741.049	594.203	756.033	612.091	774.772	584.798	735.447	582.668	729.965	574.558	742.385	576.116	732.472	570.956	753.427	585.18	749.915	576.475	743.851	589.497	750.464	573.918	725.038	567.046	735.854
595.943	773.429	588.949	775.47	603.975	800.995	601.19	801.929	595.411	800.041	592.995	797.551	593.012	783.582	593.995	778.919	601.17	773.325	592.196	753.336	595.777	740.749	595.234	740.957	594.901	741.458	594.86	756.143	611.436	774.94	584.858	736.235	582.02	730.229	574.502	743.209	575.714	732.974	571.266	753.944	585.748	750.148	577.294	743.801	590.351	750.367	574.367	725.731	566.187	736.031
595.803	774.043	588.643	775.939	604.008	801.779	602.015	801.916	596.188	800.151	593.35	797.971	593.457	783.922	593.248	779.038	601.025	773.921	592.197	754.134	595.266	740.976	594.454	740.99	594.679	742.028	595.104	756.682	611.142	775.417	584.937	737.021	581.794	730.923	574.482	744.035	575.06	733.134	571.92	754.124	586.083	750.651	578.112	743.813	591.21	750.325	574.546	726.574	565.927	736.719
595.065	774.011	588.006	776.012	604.576	802.019	602.841	801.895	596.998	800.105	593.952	798.146	594.021	784.282	592.703	779.489	600.96	774.609	591.918	754.818	594.515	740.979	593.98	741.361	593.896	741.922	595.491	757.081	610.787	775.859	585.019	737.807	581.762	731.738	574.497	744.861	574.996	733.873	571.993	754.88	586.51	751.12	578.776	744.041	592.069	750.329	574.625	727.438	565.368	737.068
594.401	774.081	587.399	776.118	604.916	801.631	603.665	801.852	597.805	800.021	594	798.87	594.373	784.874	592.471	780.248	600.519	775.039	591.382	755.142	593.909	741.305	593.961	742.156	593.219	742.122	596.045	757.316	610.143	776.046	585.098	738.594	581.806	732.56	574.577	745.684	574.299	733.983	572.728	754.981	587.331	751.208	579.065	744.669	592.927	750.383	574.635	728.307	564.941	737.554
593.96	774.387	587.014	776.502	605.194	800.997	604.488	801.789	598.613	799.935	594.675	799.002	594.523	785.631	592.422	781.046	600.119	775.393	590.972	755.48	593.98	742.102	593.985	742.942	592.935	742.671	596.145	758.026	609.371	775.953	585.167	739.381	581.875	733.38	574.733	746.495	574.04	734.537	572.956	755.577	588.164	751.177	579.582	744.929	593.774	750.511	574.576	729.174	564.521	738.048
593.867	775.046	586.718	777.125	605.88	800.607	605.31	801.708	599.422	799.869	595.429	799.014	594.574	786.408	592.51	781.84	599.728	775.835	591.034	756.263	593.824	742.74	593.236	743.006	592.944	743.421	596.882	758.012	609.127	776.468	585.221	740.169	581.956	734.199	574.965	747.283	573.634	734.945	573.396	756.09	588.996	751.104	579.887	745.447	594.561	750.781	574.419	730.023	563.969	738.361
593.136	775.138	586.077	777.437	606.687	800.449	606.129	801.605	600.228	799.872	595.942	799.248	594.541	787.185	592.788	782.555	599.136	776.015	590.844	756.957	593.385	743.126	592.986	743.57	592.727	744.024	597.611	758.069	608.719	776.919	585.232	740.959	582.042	735.017	575.299	748.029	572.996	735.177	574.129	756.26	589.826	751.019	580.33	745.811	595.075	751.38	574.067	730.738	564.211	738.958
592.397	775.135	585.338	777.624	607.506	800.373	606.938	801.441	600.881	800.089	596.022	799.943	594.431	787.954	593.32	782.969	598.432	776.043	590.238	757.147	592.955	743.499	592.61	744.002	592.084	744.213	598.071	758.416	608.074	777.14	585.032	741.694	582.122	735.837	575.767	748.69	572.708	735.897	574.805	756.009	590.656	750.931	580.779	746.184	595.337	751.894	573.373	731.027	564.957	739.119
591.654	775.075	584.584	777.75	608.328	800.342	607.673	801.118	600.987	800.817	596.761	800.112	594.133	788.616	593.97	783.108	597.978	776.442	589.892	757.584	593.021	744.29	592.031	744.226	591.989	744.857	598.225	759.044	607.298	777.09	584.507	742.013	582.186	736.657	576.394	749.207	572.851	736.693	574.979	755.285	591.487	750.852	580.994	746.791	595.844	752.258	572.991	731.543	565.029	739.957
590.913	774.996	583.823	777.824	609.15	800.351	607.976	800.51	601.651	800.969	597.531	800.101	593.626	789.09	593.965	783.899	597.643	776.884	589.591	758.068	592.786	744.901	591.988	744.992	591.919	745.572	598.995	759.048	606.525	777.004	584.012	742.292	582.219	737.478	577.169	749.481	573.488	736.91	575.598	755.034	592.32	750.8	580.824	747.594	596.226	752.708	573.04	732.372	565.922	739.976
590.172	774.919	583.06	777.873	609.97	800.406	608.285	799.91	602.424	800.973	598.309	800.024	593.034	789.239	593.98	784.679	597.226	777.26	588.97	758.231	592.203	745.162	591.979	745.783	591.584	746.083	599.772	758.967	605.75	776.954	583.902	742.972	582.182	738.289	577.986	749.573	574.039	737.319	576.393	755.057	593.15	750.801	580.66	748.398	596.685	753.125	573.101	733.238	565.978	740.831
589.429	774.866	582.297	777.907	610.784	800.518	609.034	799.608	602.883	801.307	599.086	799.934	593.033	789.94	594.497	784.962	596.829	777.66	588.858	758.907	591.925	745.686	591.393	745.993	590.939	746.243	600.514	759.009	605.226	777.186	583.169	743.024	581.855	738.963	578.81	749.55	574.35	738.01	576.852	754.681	593.894	751.05	580.568	749.211	597.131	753.615	572.768	733.814	566.74	740.978
588.705	774.891	581.533	777.922	611.563	800.761	609.849	799.483	603.171	801.835	599.865	799.859	592.924	790.621	594.962	785.3	596.464	778.086	588.26	759.105	591.977	746.488	591.021	746.444	591.012	747.038	601.039	759.317	604.983	777.749	582.994	743.636	581.225	739.149	579.629	749.447	574.467	738.816	577.241	754.216	594.047	751.734	580.616	750.019	597.151	754.471	572.278	734.229	566.974	741.651
588.028	775.068	580.768	777.911	611.917	801.364	610.672	799.436	603.788	802.015	600.626	799.945	592.57	791.088	595.115	785.95	596.022	778.42	587.918	759.55	592.048	747.276	590.971	747.214	590.877	747.732	601.114	760.004	604.489	778.248	582.561	743.992	580.895	739.637	580.442	749.296	574.51	739.632	577.736	753.887	594.579	752.029	580.896	750.751	597.077	755.328	571.874	734.669	567.564	741.965
587.965	775.74	580.005	777.878	612.321	801.822	611.497	799.439	603.889	802.656	600.929	800.439	591.966	791.24	595.873	785.995	595.683	778.922	587.604	760.032	591.812	747.921	590.91	747.934	590.437	748.115	601.882	759.982	603.772	778.485	581.899	744.196	580.511	740.086	581.251	749.122	574.499	740.448	578.013	753.32	595.031	752.415	581.476	751.301	596.98	756.184	571.408	735.08	567.953	742.479
587.497	776.011	579.242	777.829	612.94	801.983	612.319	799.498	604.447	803.095	601.247	800.905	591.822	791.852	595.981	786.676	595.028	778.995	586.882	760.153	591.209	748.144	590.178	747.994	589.965	748.418	602.613	760.042	603.011	778.634	581.497	744.859	579.929	740.33	582.062	748.959	574.441	741.262	578.587	753.068	595.248	753.032	582.251	751.568	596.89	757.039	571.045	735.533	568.396	742.938
586.77	776.023	578.481	777.754	613.653	802.032	613.125	799.643	605.19	803.304	601.952	801.005	591.251	792.093	596.493	786.973	594.362	779.097	586.609	760.893	590.856	748.66	589.737	748.59	590.006	749.209	603.026	760.42	602.24	778.735	581.329	745.628	579.81	741.021	582.781	749.106	574.312	742.065	578.92	752.532	596.004	753.102	583.062	751.676	596.848	757.897	570.569	736.06	568.923	743.315
586.064	776.043	577.725	777.643	613.984	802.566	613.828	799.951	605.998	803.358	602.721	800.974	590.768	792.498	597.25	787.011	593.893	779.476	586.506	761.677	590.785	749.451	589.54	749.35	589.848	749.891	603.214	761.001	601.465	778.804	581.261	746.412	579.048	741.122	582.949	749.685	574.011	742.726	578.945	751.783	596.062	753.905	583.881	751.71	597.032	758.646	569.759	736.12	569.234	743.905
585.99	776.707	576.983	777.463	614.45	802.977	613.984	800.685	606.81	803.363	602.917	801.537	590.596	793.245	597.908	787.119	593.632	779.938	586.517	762.471	590.82	750.255	589.51	750.159	589.249	750.109	603.937	761.057	600.688	778.838	581.289	747.197	578.664	741.736	582.94	750.47	573.384	743.011	579.18	751.158	595.978	754.729	584.7	751.701	597.5	759.131	568.894	736.041	569.897	744.148
585.589	777.19	576.336	777.123	615.192	802.988	614.557	800.936	607.621	803.344	603.337	801.928	590.606	794.02	597.983	787.831	593	780.22	586.662	763.239	590.884	751.057	589.591	750.962	588.974	750.52	604.033	761.743	599.91	778.861	581.429	747.967	578.518	742.527	583.271	751.114	572.749	743.382	579.851	750.906	595.994	755.54	585.52	751.66	598.058	759.408	568.03	735.936	570.014	744.97
584.913	777.469	575.958	776.602	615.733	803.221	615.316	800.958	608.432	803.3	604.05	802.026	590.904	794.704	598.652	788.02	592.643	780.82	587.001	763.906	590.958	751.859	589.829	751.731	589.282	751.033	604.539	762.023	599.132	778.869	581.732	748.688	578.523	743.345	584.056	751.334	572.386	744.066	580.628	750.966	596.39	755.998	586.337	751.587	598.303	760.04	567.164	735.868	569.987	745.853
584.182	777.606	575.829	775.993	616.106	803.72	615.836	801.25	609.243	803.25	604.824	801.965	591.472	794.997	599.422	787.996	592.507	781.592	587.746	763.983	591.036	752.66	590.509	751.952	590.026	751.096	605.031	762.32	598.354	778.86	582.385	749.068	578.651	744.151	584.882	751.373	572.153	744.845	580.905	750.46	596.963	756.243	587.153	751.494	598.948	760.253	566.388	735.989	570.777	745.972
583.441	777.674	575.07	776.046	616.604	804.182	616.157	801.776	610.053	803.193	604.926	802.628	591.974	795.266	600.214	787.948	592.502	782.384	587.919	764.585	591.112	753.461	590.846	752.412	590.072	751.848	605.121	763.015	597.577	778.832	583.133	749.163	578.962	744.9	585.708	751.352	571.989	745.644	581.36	749.877	596.991	757.034	587.967	751.392	599.212	760.852	565.891	736.49	570.948	746.7
582.698	777.705	574.355	775.979	617.424	804.229	616.721	802.022	610.862	803.13	605.397	803.088	592.056	795.962	600.863	788.103	592.614	783.168	588.328	765.104	591.179	754.263	591.245	752.806	590.695	751.996	605.862	763.055	596.8	778.792	583.914	749.085	579.646	745.098	586.533	751.298	571.876	746.453	582.073	749.561	597.02	757.841	588.781	751.282	599.726	761.179	565.575	736.94	571.62	746.929
581.953	777.702	573.979	775.58	618.246	804.189	616.903	802.615	611.672	803.065	606.08	803.263	592.794	795.999	600.966	788.796	592.993	783.811	589.045	765.386	591.224	755.066	591.745	753.127	591.463	752.023	606.039	763.652	596.024	778.728	584.621	749.034	579.913	744.598	587.357	751.227	571.813	747.268	582.896	749.426	597.685	758.001	589.594	751.168	600.125	761.637	564.884	737.286	571.912	747.542
581.209	777.661	573.812	774.994	619.066	804.126	617.452	803.024	612.481	802.997	606.757	803.083	592.986	796.586	601.632	788.921	593.586	784.084	589.836	765.471	591.219	755.87	591.996	753.688	592.014	752.284	606.474	763.987	595.252	778.638	584.958	749.509	580.291	744.137	588.18	751.146	571.806	748.085	583.732	749.378	597.981	758.533	590.407	751.055	600.574	762.035	564.623	738.04	572.464	747.903
580.472	777.558	573.075	774.966	619.886	804.051	618.2	803.13	613.29	802.93	606.959	802.419	593.355	796.999	601.906	789.454	594.046	784.411	590.633	765.436	591.048	756.617	592.57	753.932	592.104	752.986	607.224	764.008	594.484	778.518	585.394	749.867	580.815	743.841	589.002	751.056	571.837	748.9	584.57	749.389	598.379	758.963	591.22	750.946	601.386	762.036	564.618	738.898	572.893	748.39
579.764	777.36	572.995	774.301	620.706	803.97	619.022	803.066	614.1	802.865	607.445	802.071	593.983	797.15	602.288	789.881	594.218	785.043	591.402	765.254	590.592	757.064	592.877	754.442	592.835	753.046	607.968	764.051	593.733	778.323	585.763	750.277	580.993	743.208	589.825	750.968	571.906	749.713	585.405	749.461	598.954	759.219	592.037	750.864	602.02	762.272	564.908	739.64	573.316	748.883
579.183	777.012	572.994	773.555	621.525	803.889	619.843	802.974	614.909	802.803	608.123	801.997	594.021	797.881	602.86	790.118	594.936	785.117	591.827	764.784	589.983	757.231	593.311	754.822	592.993	753.682	608.025	764.764	593.201	777.897	586.135	750.708	581.581	742.732	590.647	750.885	572.027	750.52	586.225	749.63	599.048	759.956	592.856	750.828	602.18	763.004	565.473	740.092	573.873	749.243
579.009	776.367	572.789	773.006	622.346	803.821	620.664	802.888	615.719	802.745	608.725	801.874	594.682	797.995	602.973	790.816	595.087	785.774	592.102	764.168	590.08	758.029	593.765	755.178	593.02	754.446	608.566	765.001	592.857	777.334	586.626	751.059	582.364	742.604	591.471	750.813	572.229	751.312	586.815	750.089	599.862	759.978	593.588	750.986	602.962	763.146	566.044	740.361	574.17	749.863
578.526	776.132	572.037	773	623.168	803.78	621.486	802.89	616.53	802.694	608.979	801.339	595.431	798.013	603.645	790.937	595.6	786.025	592.639	763.686	589.972	758.796	594.041	755.706	593.276	754.98	608.984	765.363	592.556	776.781	587.41	750.971	583.175	742.665	592.297	750.767	572.526	752.071	587.167	750.68	599.981	760.692	594.096	751.407	603.818	763.121	566.245	741.033	574.85	750.098
578.176	775.75	571.993	772.282	623.988	803.797	621.885	803.375	617.341	802.657	609.442	800.822	595.956	798.247	603.95	791.463	596.371	786.02	593.422	763.531	589.397	759.044	594.607	755.945	593.975	755.071	609.145	765.983	591.8	776.614	587.821	751.338	583.778	743.025	593.117	750.785	572.922	752.776	587.613	751.078	600.525	760.994	594.264	752.019	604.675	763.043	566.966	741.173	575.022	750.838
577.927	775.243	571.556	771.976	624.67	804.03	622.303	803.821	618.153	802.631	610.137	800.591	596.046	798.922	604.003	792.199	597.042	786.17	594.215	763.446	588.608	759.042	594.888	756.47	594.001	755.848	609.915	765.995	591.026	776.566	588.21	751.801	584.124	743.623	593.879	751.011	573.43	753.4	588.448	751.074	601.334	761.006	594.917	752.2	605.531	762.954	567.146	741.859	575.802	750.983
577.366	775.059	571.089	772.174	625.123	804.518	622.926	803.999	618.964	802.63	610.91	800.517	596.764	799.004	604.114	792.838	597.082	786.925	595.012	763.412	587.968	759.187	595.339	756.836	594.65	756.004	610.074	766.684	590.252	776.602	588.747	752.12	584.548	743.971	593.991	751.718	574.047	753.916	589.283	750.996	601.94	761.196	595.172	752.763	606.388	762.879	567.753	742.124	575.925	751.724
577.119	774.557	571.013	772.865	625.414	805.015	623.662	804.024	619.774	802.677	611.688	800.548	597.514	799.011	604.789	792.972	597.751	787	595.81	763.426	587.944	759.961	595.758	757.223	594.975	756.454	610.052	767.458	589.534	776.788	589.535	752.094	584.927	744.44	594.548	751.979	574.759	754.3	590.118	750.908	602.047	761.926	595.655	753.119	607.237	762.866	568.111	742.632	576.595	752.159
576.747	774.181	570.329	772.966	626.228	804.912	623.993	804.57	620.572	802.815	612.45	800.703	597.935	799.336	604.979	793.616	598.525	787.016	596.605	763.495	587.206	759.992	596.065	757.73	594.968	757.233	609.994	768.236	588.947	777.215	590.32	752.006	585.355	744.808	594.968	752.384	575.542	754.516	590.953	750.836	602.805	762.094	596.046	753.54	607.986	763.119	568.552	743.075	577.469	752.292
576.244	773.938	569.596	772.978	626.861	805.197	624.47	804.896	620.955	803.387	612.898	801.225	598.118	799.939	604.98	794.375	599.044	787.313	597.378	763.682	586.429	760.019	596.624	758.093	595.053	757.964	610.049	768.959	588.843	777.862	591.106	751.919	585.814	745.218	595.202	752.971	576.352	754.545	591.79	750.805	603.627	762.04	596.013	754.331	608.107	763.868	569.074	743.437	578.381	752.303
576.058	773.379	569.11	773.237	627.072	805.831	624.836	805.352	621.354	803.793	613.227	801.737	598.822	800.172	605.274	794.855	599.115	788.034	597.873	764.183	585.989	760.388	597.425	758.016	595.809	758.046	610.784	768.999	588.248	777.979	591.893	751.864	586.105	745.808	595.97	753.027	577.144	754.404	592.552	750.954	604.456	761.947	596.205	755.001	608.781	764.031	569.034	744.304	579.293	752.266
575.573	773.122	568.951	773.842	627.122	806.541	625.248	805.761	621.745	804.182	613.693	802.008	599.594	800.159	605.806	795.135	599.874	788.066	598.227	764.692	585.79	760.986	598.234	757.947	596.596	758.013	611.231	769.525	587.516	778.018	592.601	751.961	586.055	746.628	596.068	753.825	577.878	754.087	593.095	751.385	605.28	761.926	596.89	755.161	609.636	763.955	568.93	745.165	580.204	752.205
575.191	772.764	568.306	773.944	627.454	807.02	625.694	806.139	622.107	804.643	614.441	801.961	600.369	800.097	605.99	795.754	600.057	788.678	598.669	764.978	585.05	761.045	598.78	758.208	596.959	758.418	611.481	770.237	586.93	778.275	593.048	752.444	585.948	747.444	595.991	754.641	578.507	753.596	593.247	752.019	605.884	762.181	597.056	755.794	610.471	763.97	569.105	745.961	581.115	752.133
574.958	772.26	568.081	774.486	628.154	807.26	626.065	806.601	622.568	804.908	614.935	802.316	601.144	800.018	605.936	796.547	600.481	789.038	599.449	764.891	584.976	761.773	599.137	758.709	597.24	758.951	611.596	771.011	586.845	778.951	593.361	752.872	585.899	748.263	595.958	755.462	578.982	752.945	593.914	752.193	606.04	762.851	596.988	756.609	611.065	764.319	569.832	746.109	582.024	752.054
574.413	772.054	567.71	774.866	628.401	808.01	626.513	806.914	623.153	805.362	615.241	802.828	601.918	799.938	606.401	796.95	601.045	789.294	600.006	765.3	584.401	762.003	599.65	759.032	597.969	759.065	611.646	771.793	586.236	779.115	593.77	753.247	586.232	748.808	596.302	755.946	579.23	752.173	594.159	752.771	606.766	762.998	596.979	757.396	611.194	765.041	569.996	746.754	582.934	751.973
574.156	771.598	567.108	775.045	628.488	808.822	627.098	807.334	623.46	806.06	615.784	803.026	602.694	799.879	607.115	797.035	601.224	790.044	600.04	766.011	583.874	762.38	600.457	758.946	598.765	758.966	611.631	772.577	585.967	779.608	594.169	753.635	586.699	749.208	596.924	756.152	579.348	751.371	594.662	753.113	607.579	762.974	597.228	758.065	611.983	765.105	570.033	747.59	583.844	751.895
573.839	771.099	566.677	775.638	628.456	809.639	627.409	808.02	623.6	806.856	616.492	803.039	603.462	799.911	607.753	797.119	601.199	790.838	600.154	766.651	583.706	763.113	600.875	759.37	599.554	758.969	611.56	773.357	585.947	780.353	594.532	754.052	586.991	749.698	597.001	756.907	579.376	750.556	595.026	753.569	607.898	763.46	597.935	758.153	612.093	765.847	570.452	748.073	584.754	751.822
573.325	770.669	566.491	776.366	628.264	810.407	627.506	808.832	623.656	807.665	617.007	803.344	603.887	800.284	607.981	797.693	601.136	791.631	600.534	767.09	583.899	763.877	601.289	759.764	599.92	759.398	611.395	774.115	585.842	781.041	595.021	754.402	586.917	750.495	596.96	757.728	579.337	749.74	595.023	754.367	608.311	763.899	597.986	758.86	612.744	766.059	571.053	748.334	585.666	751.774
572.588	770.592	566.397	777.122	627.821	811.018	627.467	809.652	623.652	808.477	617.251	803.927	604.079	800.896	608.547	797.981	601.057	792.422	601.091	767.374	584.649	763.982	601.725	760.139	600.223	759.897	611.073	774.769	585.128	781.1	594.983	755.148	587.36	751.026	597.565	757.953	579.248	748.928	595.221	755.032	609.061	763.999	598.062	759.615	613.251	766.573	571.226	749.019	586.579	751.763
571.852	770.656	566.365	777.885	627.106	811.097	627.293	810.443	623.58	809.285	617.871	804.084	604.752	801.164	609.293	797.981	600.974	793.213	601.009	768.168	584.901	764.498	602.043	760.679	600.941	760.003	610.413	774.999	584.703	781.626	595.188	755.731	588.118	751.024	597.919	758.42	579.135	748.119	595.944	755.149	609.811	764.021	598.448	760.07	613.468	767.384	572.074	748.989	587.483	751.853
571.278	770.957	566.381	778.649	626.933	811.745	626.766	810.98	623.422	810.079	618.648	804.031	605.52	801.186	609.795	798.247	600.891	794.004	601.207	768.751	585.264	765.046	601.938	761.485	601.729	759.967	610.133	775.472	584.474	782.353	595.601	756.14	588.713	751.212	598.252	758.917	579.015	747.31	595.99	755.885	609.959	764.719	599.032	760.287	613.502	768.24	572.894	749.073	587.898	752.42
570.926	771.509	566.462	779.408	626.419	812.054	626.206	811.241	623.04	810.714	619.425	803.94	606.297	801.155	610.125	798.741	600.823	794.796	601.693	769.112	585.919	765.427	602.383	761.892	601.926	760.563	609.706	775.823	584.373	783.123	596.023	756.501	589.124	751.656	598.993	759.022	578.91	746.5	596.066	756.648	610.591	764.914	599.127	761.003	613.393	769.086	573.072	749.763	588.379	752.941
570.61	771.887	566.618	780.153	625.962	812.424	625.835	811.695	622.494	811.124	620.204	803.879	607.074	801.099	610.672	799.035	600.789	795.589	602.25	769.478	586.704	765.603	602.79	762.3	602.396	760.896	609.256	776.166	584.341	783.901	595.92	757.283	589.559	752.103	599.813	758.958	578.896	745.701	596.495	757.068	610.907	765.448	599.841	761.097	613.075	769.869	573.639	750.06	589.155	753.104
570.23	772.249	566.954	780.737	625.752	813.039	625.441	812.132	621.999	811.394	620.816	804.146	607.849	801.031	611.468	798.95	600.869	796.364	602.506	770.225	587.504	765.693	603.186	762.708	602.881	761.219	609.009	776.691	584.369	784.678	596.215	757.866	590.379	752.067	599.946	759.654	579.138	745.081	597.043	757.348	611.335	765.847	600.066	761.697	612.294	769.96	574.044	750.519	590.065	753.042
569.855	772.625	567.567	781.018	624.935	812.997	624.938	812.446	622.1	812.198	621.155	804.617	608.624	800.956	611.865	799.369	601.182	796.954	602.603	771.017	588.306	765.74	603.607	763.1	603.054	761.857	608.459	776.993	584.452	785.45	596.825	758.05	591.196	751.966	600.501	759.948	579.909	745.033	597.195	758.035	611.944	766.131	600.547	762.024	612.086	770.595	574.399	751.026	590.973	752.949
569.518	773.027	567.973	781.425	624.14	813.045	624.705	813.073	621.849	812.855	621.462	805.075	609.4	800.886	612.267	799.774	601.906	797.014	602.639	771.814	589.111	765.76	603.975	763.521	603.752	761.965	607.73	776.992	584.627	786.197	597.522	758.086	592.015	751.89	601.265	759.986	579.957	744.261	597.952	758.112	612.389	766.777	601.342	762.028	612.054	771.406	575.01	751.277	591.882	752.863
569.107	773.362	568.06	782.086	623.944	813.67	623.887	812.987	621.22	813.042	622.049	805.287	610.176	800.826	612.7	800.128	601.863	797.727	602.622	772.612	589.915	765.756	604.41	763.967	603.939	762.575	607.222	777.228	584.945	786.878	598.025	758.379	592.695	752.085	601.854	760.185	580.561	744.037	598.085	758.83	612.567	767.589	602.015	762.169	611.683	771.936	575.148	752.002	592.793	752.818
568.752	773.75	568	782.847	623.479	814.003	623.219	813.169	620.49	813.089	622.231	805.855	610.952	800.78	613.014	800.615	601.918	798.475	602.547	773.405	590.719	765.729	605.129	764.002	604.402	762.906	606.915	777.734	585.658	786.977	598.274	758.958	593.145	752.538	602.074	760.809	580.941	743.602	598.699	759.018	612.641	768.419	602.053	762.957	610.909	772.048	575.952	752.056	593.662	752.911
568.39	774.132	567.915	783.607	622.68	814.009	622.853	813.649	619.948	813.358	622.806	806.12	611.73	800.762	613.499	800.929	602.283	799.045	602.402	774.187	591.521	765.658	605.71	764.194	604.858	763.232	606.395	778.096	585.904	787.496	598.946	759.049	593.415	753.049	602.734	760.966	581.203	742.981	599.505	759.033	612.651	769.252	602.778	763.132	610.187	772.089	576.027	752.852	594.034	753.579
567.983	774.471	567.842	784.368	621.989	814.155	622.44	814.026	619.79	814.025	623.274	806.565	612.492	800.871	613.85	801.378	602.981	799.338	602.016	774.845	592.317	765.547	606.099	764.653	605.035	763.841	605.625	778.052	586.25	787.954	599.732	758.983	593.99	753.308	602.92	761.588	581.884	742.633	600.042	759.349	612.597	770.083	603.592	763.13	610.045	772.782	576.671	753.27	594.54	753.931
567.645	774.874	567.839	785.13	621.947	814.923	621.647	813.995	619.009	813.984	623.459	807.314	612.877	801.321	614.26	801.773	603.775	799.387	601.357	775.027	593.1	765.371	606.534	765.12	605.72	764.068	604.845	777.987	586.807	788.015	600.461	758.994	594.252	753.846	603.434	761.937	582.696	742.582	600.186	760.038	612.459	770.901	604.41	763.063	609.336	773.026	577.513	753.424	594.922	754.475
567.247	775.233	568.083	785.718	621.216	814.985	620.982	814.224	618.3	814.1	623.501	808.093	613.197	801.806	614.683	802.15	604.569	799.35	601.036	775.457	593.718	765.021	607.345	765.103	606.504	764.007	604.279	778.16	586.934	787.338	601.032	759.292	594.747	754.182	604.174	762.01	583.477	742.757	601.019	759.992	612.176	771.644	605.226	762.976	608.503	772.986	578.38	753.43	595.429	754.846
566.859	775.577	568.552	786.107	620.426	815.018	620.812	814.854	617.9	814.531	623.423	808.868	613.785	802.006	615.006	802.617	605.361	799.286	601.063	776.238	594.038	764.411	608.153	765.024	607.301	763.944	603.999	778.683	587.478	787.019	601.23	759.89	595.02	754.701	604.799	762.15	583.884	743.285	601.824	760.038	611.54	772.027	606.042	762.891	608.141	773.427	579.227	753.293	595.931	755.338
566.539	775.93	568.935	786.434	619.998	815.416	620.294	815.142	617.623	815.063	623.169	809.569	614.557	801.932	615.493	803	606.152	799.206	600.965	776.983	594.407	763.841	608.962	764.934	607.843	764.185	603.555	779.238	588.182	786.953	601.855	759.999	595.032	755.462	605.009	762.767	584.244	743.777	602.038	760.664	611.132	772.402	606.861	762.843	607.745	774.023	579.886	752.91	596.091	756.111
565.942	776.253	569.303	786.838	619.747	815.979	619.904	815.576	616.959	815.221	622.677	809.998	614.883	802.399	616.238	802.99	606.942	799.115	600.192	777.045	595.129	763.605	609.772	764.869	608.061	764.798	602.844	779.495	588.957	787.014	602.552	760.071	595.314	756.054	605.633	763.101	584.734	744.078	602.508	761.01	610.708	772.809	607.657	762.955	607.042	774.412	579.993	752.146	596.004	757.019
565.58	776.829	569.678	787.207	619.04	816.085	619.543	816.027	616.829	815.912	622.005	810.095	615.268	802.811	616.757	803.24	607.731	799.017	599.419	777.022	595.922	763.489	610.535	764.92	608.701	765.002	602.076	779.649	589.711	787.035	603.063	760.386	595.924	756.241	606.434	763.099	584.986	744.666	603.333	761.001	610.28	773.219	608.006	763.471	606.195	774.546	580.677	751.673	595.916	757.926
565.376	777.541	570.052	787.585	618.993	816.87	618.737	815.987	616.254	816.145	622.033	810.87	615.744	803.108	617.126	803.712	608.521	798.927	599.034	777.396	596.724	763.437	611.037	765.386	609.482	764.953	601.298	779.749	589.899	786.452	603.238	761.011	596.19	756.794	607.256	763.021	585.547	744.891	604.015	761.159	609.867	773.634	608.314	763.967	605.335	774.577	581.51	751.454	596.066	758.685
565.253	778.276	570.403	788.098	618.978	817.658	618.043	816.157	615.895	816.591	622.008	811.628	615.929	803.675	617.616	804.105	609.313	798.86	598.818	777.978	597.528	763.433	611.333	765.857	609.879	765.355	600.516	779.808	590.322	785.933	603.982	760.99	596.656	757.148	608.079	762.932	585.957	745.387	604.024	761.98	609.464	774.064	609.092	763.984	604.476	774.517	582.368	751.314	596.622	759.118
565.181	779.018	571.14	788.128	618.493	817.976	617.867	816.791	615.54	817.021	621.582	811.987	616.479	804.027	618.415	804.053	610.106	798.845	598.037	778.011	598.33	763.485	611.77	766.234	610.236	765.819	599.732	779.839	590.94	785.577	604.657	761.105	597.104	757.524	608.902	762.871	586.09	746.094	604.823	762.003	609.035	774.446	609.894	764.009	603.645	774.317	583.232	751.209	597.003	759.624
565.13	779.761	571.9	788.072	618.032	818.338	617.333	817.092	614.752	816.993	621.007	812.192	617.185	804.118	619.212	803.96	610.806	798.984	597.248	777.976	599.117	763.633	612.183	766.616	610.783	766.069	598.948	779.853	591.695	785.399	605.087	761.49	597.384	758.07	609.702	762.904	586.013	746.906	605.648	762	608.645	774.944	610.002	764.716	603.135	773.785	584.098	751.128	596.9	760.517
565.098	780.506	572.659	787.982	617.99	819.129	616.969	817.538	614.056	817.145	620.99	812.957	617.96	804.06	620.01	803.898	610.97	799.667	597.036	778.554	599.744	764.011	612.581	767.022	610.982	766.689	598.164	779.84	592.466	785.292	605.323	762.042	597.997	758.266	609.965	763.548	585.915	747.717	605.994	762.481	607.93	774.994	610.55	764.98	602.746	773.235	584.967	751.07	597.431	761.071
565.085	781.251	573.418	787.891	617.999	819.924	616.977	818.334	613.887	817.771	620.265	813.01	618.733	803.969	620.672	804.053	611.522	799.936	596.642	778.964	600.142	764.547	613.245	767.339	611.536	766.887	597.38	779.798	593.241	785.229	606.108	761.98	598.2	758.937	610.456	763.889	585.901	748.529	606.328	762.994	607.287	775.167	610.96	765.386	602.17	772.989	585.836	751.035	598.309	760.998
565.114	781.996	574.18	787.863	617.233	819.968	616.829	819.029	613.39	818.078	620.005	813.526	619.507	803.886	621.08	804.539	612.241	799.968	595.877	778.995	600.426	765.032	613.47	768.118	612.076	767.303	596.599	779.733	594.018	785.2	606.772	762.125	598.875	759.057	611.17	763.936	586.403	748.906	607.129	763.035	606.854	775.606	611.217	765.946	601.411	772.951	586.706	751.007	598.858	761.343
565.161	782.739	574.759	788.134	616.98	820.59	616.065	819.106	612.94	818.438	619.675	813.972	620.284	803.865	621.439	804.935	612.812	800.157	595.085	778.957	601.225	764.941	613.593	768.918	612.457	767.945	595.822	779.628	594.796	785.199	607.1	762.603	599.693	758.976	611.816	764.133	586.798	749.325	607.96	762.929	606.51	776.084	611.954	766.036	600.976	772.482	587.577	751.009	599.288	761.892
[truncated: 4,410 more rows]
[truncated: 650 more columns]

## Sheet: Fig 5C Piezo1-GoF Boundaries
X	Y	X	Y	X	Y	X	Y	X	Y	X	Y	X	Y	X	Y	X	Y	X	Y	X	Y	X	Y	X	Y	X	Y	X	Y	X	Y	X	Y	X	Y	X	Y	X	Y	X	Y	X	Y	X	Y	X	Y	X	Y
[truncated: 5,178 more rows]
[truncated: 650 more columns]
